# Supplementary material for: Deciphering Estrus Expression in Gilts: The Role of Alternative Polyadenylation and LincRNAs in Reproductive Transcriptomics
Source: Animals (Basel). 2024 Mar 4;14(5):791. doi: 10.3390/ani14050791 (PMC10931002; doi:10.3390/ani14050791)
Supplement: Supplementary file 1 [file animals-14-00791-s001.zip]

Archive with 16 entries (16 files):
- figures1.tif
- figures2.tif
- figures3.tif
- figures4.tif
- figures5.tif
- Supplementary Figure.pdf
- Table S1.xlsx
- table S10.xlsx
- Table S2.xlsx
- Table S3.xlsx
- Table S4.xlsx
- table S5.xlsx
- table S6.xlsx
- table S7.xlsx
- table S8.xlsx
- table S9.xlsx
