# Supplementary material for: Deciphering Estrus Expression in Gilts: The Role of Alternative Polyadenylation and LincRNAs in Reproductive Transcriptomics
Source: Animals (Basel). 2024 Mar 4;14(5):791. doi: 10.3390/ani14050791 (PMC10931002; doi:10.3390/ani14050791)
Supplement: Supplementary file 1 [file animals-14-00791-s001.zip › Table S1.xlsx]

## Sheet: Sheet1
Table S1. Primer for the 3'UTRs of genes for real-time quantitative PCR
Gene name	Primer sequence
GAPDH	F	TCGGAGTGAACGGATTTGGC
	R	TGACAAGCTTCCCGTTCTCC
TOMM40L	F	AGCCCTTCAGCCCTTCTTTC
	R	CCATGCTCTTGTGGCTCTGA
ABHD2	F	GGGCTCAGGGCATACTTTGT
	R	AGATTTCAGCTGGGACACGG
CEP162	F	CTAGCCCGCTCTCTGCTTTT
	R	TGCCAGTCCTTGTTTTGTAACT
POLA2	F	TGTCCGTGGGGAATCAACAG
	R	ACCTGCAGAGGGAGAGGAG
PCNX	F	CAGGCCATGCTTTCCCTTTAC
	R	CCATGTTCAAGCGGACCTGTA
NFIB	F	CCATTTCGGCCTCCTCCTTT
	R	AAGCAACGCAAGGAAAGCTG
