# Supplementary material for: Deciphering Estrus Expression in Gilts: The Role of Alternative Polyadenylation and LincRNAs in Reproductive Transcriptomics
Source: Animals (Basel). 2024 Mar 4;14(5):791. doi: 10.3390/ani14050791 (PMC10931002; doi:10.3390/ani14050791)
Supplement: Supplementary file 1 [file animals-14-00791-s001.zip › Table S2.xlsx]

## Sheet: all-samples
Table S2. Alignment of samples used for RNA sequencing
Sample	Clean reads	mapped reads	mapping Percent
LDV1	57499147	55633527	0.9676
LDV2	55105983	53461083	0.9702
LDV3	55680809	54008692	0.97
LDY1	51048325	49552851	0.9707
LDY2	51527219	50023643	0.9708
LDY3	52824249	51200274	0.9693
LEV1	53222070	51652743	0.9705
LEV2	55528435	54030979	0.973
LEV3	55272187	53603848	0.9698
LEY1	53879996	52338678	0.9714
LEY2	53650252	52014360	0.9695
LEY3	53711422	52175083	0.9714
MDV1	57317025	55428489	0.9671
MDV2	53441720	51536576	0.9644
MDV3	54705193	52778363	0.9648
MDY1	51845790	50200609	0.9683
MDY2	51937264	50145962	0.9655
MDY3	52035560	50267796	0.966
MEV1	53956865	52136392	0.9663
MEV2	53920371	52067758	0.9656
MEV3	56220672	54375126	0.9672
MEY1	53319283	51595157	0.9677
MEY2	53316945	51727619	0.9702
MEY3	52444646	50861546	0.9698
