# Supplementary material for: Deciphering Estrus Expression in Gilts: The Role of Alternative Polyadenylation and LincRNAs in Reproductive Transcriptomics
Source: Animals (Basel). 2024 Mar 4;14(5):791. doi: 10.3390/ani14050791 (PMC10931002; doi:10.3390/ani14050791)
Supplement: Supplementary file 1 [file animals-14-00791-s001.zip › Table S3.xlsx]

## Sheet: LDV vs LEV
Analysis of differentially expressed genes in LDV vs. LEV
gene	baseMean	log2FoldChange	lfcSE	stat	pvalue	padj
ALDH1A1	4402.21	-1.88758	1.12404	-1.67928	0.0930973	0.567137
ANXA1	8570.5	-0.102393	0.635154	-0.161209	0.871929	0.969269
RORB	2.89303	-0.919466	1.82572	-0.503618	0.61453	NA
TRPM6	17.0615	-1.16355	0.73888	-1.57475	0.115315	0.597315
C9orf40	230.522	-0.0796319	0.209731	-0.379687	0.704178	0.918371
CARNMT1	547.273	-0.157234	0.369583	-0.425437	0.670518	0.906697
NMRK1	113.385	1.19505	0.647393	1.84594	0.0649016	0.51525
OSTF1	1503.21	0.345015	0.322206	1.07079	0.284264	0.732919
PCSK5	124.92	-1.02187	0.666525	-1.53313	0.125244	0.614003
ENSSSCG00000057774	19.8403	-0.31075	0.519687	-0.597956	0.549869	0.860594
RFK	624.348	-0.457376	0.386597	-1.18308	0.236777	0.7013
GCNT1	200.799	-1.37185	0.686727	-1.99767	0.045753	0.469074
ENSSSCG00000039009	95.8901	-2.57666	0.965786	-2.66794	0.00763176	0.222775
ENSSSCG00000060679	2.37628	-4.69492	2.73731	-1.71516	0.0863163	NA
VPS13A	564.849	0.114461	0.166434	0.687724	0.491627	0.836633
GRIK2	13.7401	-1.06593	0.835188	-1.27627	0.201858	0.678199
FAXC	395.209	-0.0659393	0.208783	-0.315826	0.752134	0.93271
LMBRD1	809.716	0.220646	0.305838	0.721446	0.470635	0.828866
PNISR	1039.5	0.556672	0.326258	1.70623	0.0879649	0.55781
COL19A1	12.0222	-0.80425	0.97192	-0.827485	0.407962	0.795711
ENSSSCG00000004261	2.35218	0.0775136	1.34823	0.0574927	0.954153	NA
ENSSSCG00000050732	0.331564	0.020594	4.08047	0.00504697	0.995973	NA
USP45	223.093	0.302406	0.29586	1.02213	0.306721	0.744848
KPNA5	178.721	-0.198104	0.281405	-0.703982	0.481444	0.832855
ENSSSCG00000038757	251.895	0.133878	0.410667	0.326001	0.744423	0.932225
CCNC	938.991	-0.0105631	0.372324	-0.0283707	0.977367	0.995649
GNA14	192.231	-2.00646	0.460889	-4.35345	1.3401e-05	0.00605303
ZUP1	164.106	0.201657	0.333225	0.605169	0.545066	0.858948
ABHD17B	474.887	0.657828	0.499961	1.31576	0.188255	0.66851
C9orf85	116.686	0.26348	0.499294	0.527705	0.597704	0.879246
ENSSSCG00000004355	1.76889	-0.55658	2.44665	-0.227487	0.820045	NA
GDA	17.1246	2.17516	1.37045	1.58718	0.112471	0.594255
RSPH4A	6.13498	0.655025	0.851123	0.7696	0.441537	0.812701
ENSSSCG00000032533	0.821185	-0.610366	2.17436	-0.280711	0.778932	NA
ENSSSCG00000031854	2.08402	1.20898	1.41992	0.851438	0.394526	NA
PTP4A1	1790.54	0.0594105	0.423864	0.140164	0.88853	0.974383
ZFAND5	1969.9	-0.0929899	0.314559	-0.29562	0.76752	0.937364
KLHL32	24.1376	-1.94605	0.658065	-2.95724	0.00310411	0.147997
ENSSSCG00000004243	0.310844	1.79244	4.04581	0.443037	0.657739	NA
TMC1	3.9658	0.266425	0.893374	0.298223	0.765533	NA
ENSSSCG00000004246	55.0492	0.571909	0.469962	1.21693	0.223632	0.692487
ASF1A	336.938	0.218534	0.328854	0.664532	0.50635	0.843794
CEP85L	373.165	-1.02139	0.645976	-1.58115	0.113843	0.595329
TLE4	622.137	0.409471	0.320501	1.27759	0.201392	0.677784
TXNDC16	118.53	-0.436921	0.398327	-1.09689	0.272689	0.724526
ENSSSCG00000044405	0.323824	0.020594	4.08047	0.00504697	0.995973	NA
ENSSSCG00000062089	321.798	-1.66302	0.700942	-2.37255	0.0176659	0.329372
GPR137C	7.31912	0.881736	1.06963	0.824341	0.409746	0.796527
GJA1	15785.4	0.992963	0.721008	1.37719	0.168455	0.658076
ERO1A	1199.6	-0.291104	0.345128	-0.843468	0.398967	0.793238
TBC1D32	177.674	0.298675	0.427165	0.699203	0.484425	0.834749
TLE1	910.523	-0.626018	0.45655	-1.37119	0.170315	0.659271
PSMC6	1521.34	0.153778	0.366747	0.419304	0.674994	0.908796
FAM184A	29.3776	-0.417138	0.989539	-0.421548	0.673355	0.908249
ENSSSCG00000033805	9.95631	-0.391937	0.830802	-0.471758	0.637099	0.893945
ENSSSCG00000037497	1.26706	-3.7931	2.15676	-1.7587	0.0786282	NA
GNAQ	387.583	-0.733266	0.621479	-1.17987	0.238051	0.702651
MMS22L	82.0736	-0.00498498	0.699316	-0.00712837	0.994312	0.998577
CEP78	196.27	0.181334	0.382682	0.47385	0.635607	0.893458
COL9A1	6.3151	0.187993	1.21457	0.154781	0.876994	0.970768
STYX	380.544	0.0857994	0.333043	0.257623	0.796698	0.944235
GNPNAT1	388.349	-0.204498	0.343852	-0.594727	0.552026	0.860941
SLC35F1	61.9104	-0.657236	0.78405	-0.838257	0.401886	0.794069
PSAT1	3191.44	0.987501	0.659583	1.49716	0.134352	0.624768
FERMT2	1926.16	-1.00997	0.899003	-1.12343	0.261255	0.715295
NUS1	835.302	-0.468745	0.294362	-1.59241	0.111293	0.592984
ENSSSCG00000058846	1.29229	1.53781	2.10402	0.730893	0.464845	NA
ENSSSCG00000043640	0.152119	-0.941187	4.08047	-0.230656	0.817582	NA
ENSSSCG00000004253	752.563	-0.136705	0.216891	-0.630294	0.528502	0.854405
ENSSSCG00000056780	0.158322	-0.941187	4.08047	-0.230656	0.817582	NA
ENSSSCG00000054867	0.165503	0.982367	4.08047	0.240748	0.80975	NA
ENSSSCG00000056863	0.496508	2.45554	3.99515	0.614631	0.538798	NA
ENSSSCG00000060009	125.697	0.0928735	0.340659	0.272629	0.785139	0.942589
ENSSSCG00000054181	3.09876	-0.274435	1.39564	-0.196638	0.844111	NA
ENSSSCG00000062298	3.41938	0.336702	1.20843	0.278627	0.780531	NA
ENSSSCG00000062781	1.29276	-1.61087	1.90844	-0.84408	0.398625	NA
ENSSSCG00000044318	0.155422	0.982367	4.08047	0.240748	0.80975	NA
ENSSSCG00000063502	0.691059	-1.53467	2.72193	-0.563816	0.57288	NA
ENSSSCG00000058465	0.158322	-0.941187	4.08047	-0.230656	0.817582	NA
ENSSSCG00000062448	0.152119	-0.941187	4.08047	-0.230656	0.817582	NA
HACE1	615.769	0.289918	0.361704	0.801534	0.422823	0.801963
DDHD1	483.113	-0.116048	0.370441	-0.31327	0.754076	0.933707
ENSSSCG00000053831	0.469166	0.831236	3.96447	0.209672	0.833924	NA
DCBLD1	521.304	0.555227	0.265231	2.09337	0.0363159	0.428402
ENSSSCG00000061420	0.179445	0.982367	4.08047	0.240748	0.80975	NA
ENSSSCG00000057344	0.682714	1.55734	2.72253	0.572018	0.56731	NA
ENSSSCG00000053722	0.317622	0.020594	4.08047	0.00504697	0.995973	NA
ENSSSCG00000053577	0.158322	-0.941187	4.08047	-0.230656	0.817582	NA
ROS1	0.155422	0.982367	4.08047	0.240748	0.80975	NA
BMP4	677.235	-1.95903	0.655986	-2.98639	0.00282296	0.138835
CDKN3	101.546	-0.23968	0.53091	-0.451452	0.651664	0.899841
ENSSSCG00000019939	0.81371	-0.486852	2.17221	-0.224128	0.822658	NA
BVES	141.487	0.521937	0.585534	0.891386	0.372722	0.779769
CNIH1	1721.02	-0.664383	0.423003	-1.57063	0.116268	0.599646
VGLL2	0.501239	-0.897548	2.89903	-0.309603	0.756863	NA
POPDC3	156.258	0.272414	0.542305	0.502326	0.615438	0.886983
RFX6	19.3112	-1.17288	1.15625	-1.01439	0.310397	0.748475
PREP	1625.8	0.988785	0.440099	2.24673	0.0246571	0.376525
GMFB	1244.88	-0.185246	0.35202	-0.526239	0.598722	0.879332
ENSSSCG00000053030	0.323824	0.020594	4.08047	0.00504697	0.995973	NA
MANEA	428.578	-0.243743	0.205498	-1.18611	0.23558	0.700051
FAM162B	171.997	-1.41643	1.03489	-1.36868	0.171098	0.659271
PHF3	1297.75	0.1211	0.20772	0.582997	0.559895	0.863293
CGRRF1	273.005	-0.0282089	0.208328	-0.135407	0.89229	0.974812
RPS29	4426.63	0.0646337	0.251819	0.256667	0.797436	0.94453
ENSSSCG00000042849	0.627085	-2.77695	3.60241	-0.770857	0.440792	NA
UFL1	773.784	-0.265815	0.211146	-1.25892	0.20806	0.681517
LRR1	131.154	-0.289848	0.490461	-0.590972	0.554539	0.861044
MAN1A1	1140.24	-0.878082	0.477264	-1.83983	0.0657937	0.516903
FBXL4	337.724	0.0954299	0.309631	0.308205	0.757927	0.935096
SIM1	88.2581	-0.10896	1.20411	-0.0904902	0.927898	0.98173
RPL36AL	2614.21	-0.560884	0.246763	-2.27296	0.0230284	0.364968
FAM135A	1675.63	1.18804	0.634654	1.87194	0.0612145	0.506785
MGAT2	334.698	-0.814725	0.291461	-2.79532	0.00518485	0.191745
ENSSSCG00000058931	243.743	0.0705929	0.265939	0.265448	0.790665	0.943121
DNAAF2	49.5192	-0.67122	0.790116	-0.84952	0.395592	0.790709
ASCC3	755.534	0.270423	0.310864	0.869908	0.384351	0.785127
ADGRB3	29.645	-3.68412	1.11596	-3.3013	0.000962369	0.0770011
KLHDC1	116.029	0.0722235	0.27644	0.261263	0.79389	0.943541
LRFN5	46.2076	-0.930364	0.85508	-1.08804	0.276576	0.727554
ENSSSCG00000061940	0.152119	-0.941187	4.08047	-0.230656	0.817582	NA
FHL5	264.658	-0.380262	0.933582	-0.407315	0.683777	0.912087
ENSSSCG00000055064	0.183617	-0.941187	4.08047	-0.230656	0.817582	NA
ENSSSCG00000058693	4.50565	0.241162	1.16608	0.206814	0.836155	NA
KLHDC2	733.802	-0.130388	0.161519	-0.807258	0.419518	0.799943
ENSSSCG00000063225	0.313744	0.020594	4.08047	0.00504697	0.995973	NA
GPR63	86.2321	-1.07606	0.641741	-1.67678	0.0935856	0.567738
NEMF	496.146	-0.0323962	0.193152	-0.167724	0.866801	0.967849
RAB11A	5006.54	0.17107	0.333745	0.512576	0.608248	0.884216
NDUFAF4	104.797	-0.162863	0.338037	-0.48179	0.629955	0.892469
ENSSSCG00000054004	2.69345	1.24868	1.529	0.816662	0.414122	NA
ENSSSCG00000056940	1.1579	-0.441001	1.97503	-0.223289	0.823311	NA
ENSSSCG00000056101	0.335736	-1.86432	4.03565	-0.461962	0.644108	NA
ENSSSCG00000060433	1.89158	1.58908	2.0206	0.786439	0.43161	NA
ENSSSCG00000052010	0.344947	1.92255	4.03401	0.476585	0.633658	NA
ENSSSCG00000062752	0.165503	0.982367	4.08047	0.240748	0.80975	NA
ARF6	4045.56	0.0441769	0.420443	0.105072	0.916318	0.97966
ENSSSCG00000043532	1.11545	1.37402	2.01646	0.6814	0.495619	NA
ENSSSCG00000045405	5.12548	1.05387	0.939682	1.12152	0.262066	0.716312
RTRAF	2310.62	-0.352007	0.257142	-1.36892	0.171024	0.659271
ENSSSCG00000061626	0.183617	-0.941187	4.08047	-0.230656	0.817582	NA
ENSSSCG00000060707	1.76453	-0.76567	1.35759	-0.563991	0.57276	NA
ENSSSCG00000042509	0.479246	0.877076	2.90984	0.301417	0.763096	NA
ENSSSCG00000060554	0.773001	-3.08019	3.33767	-0.922855	0.356083	NA
ENSSSCG00000042619	0.165503	0.982367	4.08047	0.240748	0.80975	NA
NID2	1249.6	-0.195883	0.998078	-0.19626	0.844407	0.959624
ENSSSCG00000053196	0.339039	0.020594	4.08047	0.00504697	0.995973	NA
ENSSSCG00000053772	0.468763	-2.35844	3.86148	-0.610761	0.541358	NA
MEGF11	9.09028	-0.499924	0.82636	-0.604971	0.545198	0.858985
ENSSSCG00000059926	3.43462	-1.31079	1.38079	-0.949304	0.342466	NA
ENSSSCG00000057553	0.179445	0.982367	4.08047	0.240748	0.80975	NA
ENSSSCG00000046110	0.165503	0.982367	4.08047	0.240748	0.80975	NA
ENSSSCG00000062113	0.165503	0.982367	4.08047	0.240748	0.80975	NA
ENSSSCG00000059823	0.316644	-1.79238	4.04212	-0.443424	0.657459	NA
ENSSSCG00000057054	25.3789	-0.419827	0.778134	-0.539531	0.589521	0.875889
PTGER2	104.717	-1.77833	0.551493	-3.22458	0.00126158	0.0894502
FRMD6	2684.38	0.157119	0.322924	0.486552	0.626576	0.891754
ENSSSCG00000057794	0.158322	-0.941187	4.08047	-0.230656	0.817582	NA
ENSSSCG00000055234	0.179445	0.982367	4.08047	0.240748	0.80975	NA
ENSSSCG00000047735	0.989094	-2.20034	2.48968	-0.883783	0.376813	NA
ENSSSCG00000028092	789.342	-0.929403	0.525574	-1.76836	0.0770012	0.539321
DIS3L	320.481	0.137778	0.387064	0.355957	0.721872	0.925956
TIPIN	142.068	-0.240429	0.395421	-0.608035	0.543164	0.858324
MAP2K1	665.269	-0.255363	0.200711	-1.27229	0.20327	0.679441
VCPKMT	116.601	0.0843888	0.368073	0.229272	0.818658	0.950256
SOS2	847.239	0.316343	0.215519	1.46782	0.142153	0.631286
ENSSSCG00000050792	0.323824	0.020594	4.08047	0.00504697	0.995973	NA
L2HGDH	406.656	0.656149	0.327616	2.0028	0.0451988	0.46755
DMAC2L	125.711	0.108623	0.361033	0.300867	0.763516	0.935772
SNAPC5	119.539	-0.188856	0.254232	-0.742851	0.457572	0.82082
RPL4	41544.3	-0.188865	0.283168	-0.666969	0.504792	0.843569
CTDP1	1001.47	0.24803	0.210717	1.17708	0.239165	0.703638
CDKL1	111.395	-1.07315	0.655833	-1.63631	0.101775	0.57805
NETO1	0.152119	-0.941187	4.08047	-0.230656	0.817582	NA
MAP4K5	1091.42	0.0694231	0.31367	0.221325	0.824839	0.952419
PCSK6	1523.96	0.0732187	0.661831	0.110631	0.911909	0.978479
ZWILCH	159.188	-0.403977	0.339824	-1.18878	0.234524	0.699849
ENSSSCG00000048049	1.32466	-0.14483	2.55894	-0.0565977	0.954866	NA
ATL1	72.6237	-0.0414894	0.337686	-0.122864	0.902215	0.97714
SNRPA1	551.69	0.0369435	0.271331	0.136157	0.891698	0.974537
ENSSSCG00000051767	0.34912	0.020594	4.08047	0.00504697	0.995973	NA
LCTL	6.7778	-0.954671	0.910095	-1.04898	0.294188	0.737851
SMAD6	183.125	-0.813522	0.651387	-1.24891	0.211699	0.685068
TLE3	1991.87	0.293383	0.239657	1.22418	0.220884	0.69105
SAV1	694.929	-0.455325	0.300647	-1.51449	0.129903	0.617818
MBP	2641.82	-1.045	0.475103	-2.19953	0.0278406	0.390086
ENSSSCG00000004963	1284.77	-0.080563	0.247479	-0.325535	0.744776	0.932225
NIN	420.589	0.147853	0.356246	0.41503	0.67812	0.909885
SPESP1	0.316644	-1.79238	4.04212	-0.443424	0.657459	NA
NOX5	137.289	-1.89096	0.713808	-2.64911	0.00807036	0.227841
GLCE	820.805	-0.0281568	0.264395	-0.106495	0.91519	0.97966
PAQR5	180.42	1.37269	0.880194	1.55953	0.118871	0.605646
PYGL	5208.12	0.723483	0.398891	1.81374	0.0697185	0.525076
KIF23	310.332	0.176535	0.894829	0.197284	0.843605	0.959624
ENSSSCG00000004970	24774.9	-0.168121	0.209147	-0.80384	0.421489	0.800713
ZNF236	431.529	0.5077	0.334814	1.51637	0.129427	0.617251
SMAD3	1775.04	-0.630932	0.329554	-1.9145	0.0555559	0.490891
ABHD12B	542.068	1.70167	0.670717	2.53709	0.0111778	0.270559
ZNF516	156.25	0.0727021	0.467439	0.155533	0.876401	0.970487
TRIM9	7.87682	-1.40025	0.978865	-1.43048	0.152579	0.637041
NFATC1	1030.44	-0.375277	0.434443	-0.863811	0.387692	0.787226
AAGAB	897.494	-0.0688002	0.197307	-0.348696	0.727318	0.926501
TMX1	1246.26	-0.0541555	0.340516	-0.15904	0.873638	0.969777
ENSSSCG00000057448	0.341939	-1.8879	4.03359	-0.468043	0.639754	NA
C15orf61	82.9877	0.357998	0.26948	1.32847	0.184021	0.666063
MDGA2	2.7867	0.540563	1.13138	0.47779	0.6328	NA
MAP2K5	464.67	0.0202078	0.262388	0.0770149	0.938612	0.984927
C14orf28	175.64	-0.269211	0.273239	-0.985259	0.324497	0.758397
KLHL28	520.572	-0.052707	0.231052	-0.228118	0.819555	0.950586
TOGARAM1	546.099	-0.320302	0.258944	-1.23695	0.216104	0.688487
ATP9B	799.391	-0.275343	0.17467	-1.57636	0.114943	0.597315
SKOR1	4.39666	-0.513341	0.880895	-0.582749	0.560062	NA
PRPF39	795.592	0.335895	0.352218	0.953655	0.340258	0.764924
FKBP3	963.707	0.095419	0.238689	0.399763	0.689331	0.914131
PIAS1	485.791	-0.264928	0.269877	-0.981662	0.326266	0.759636
ENSSSCG00000040521	0.183617	-0.941187	4.08047	-0.230656	0.817582	NA
FANCM	63.5407	0.18357	0.615029	0.298475	0.765341	0.936601
SALL3	71.3748	-5.50306	1.30048	-4.23155	2.32085e-05	0.00785219
CALML4	376.218	-1.70709	0.671642	-2.54167	0.0110326	0.270193
ENSSSCG00000060932	1.11962	0.39106	2.03289	0.192367	0.847455	NA
CLN6	748.973	-0.106663	0.329336	-0.323874	0.746034	0.932225
TSHZ1	579.371	-0.0363401	0.322383	-0.112723	0.91025	0.978479
ZADH2	1051.57	0.0684392	0.236142	0.289822	0.771953	0.938631
ENSSSCG00000053589	48.9202	0.48034	0.341601	1.40615	0.159681	0.644255
MIS18BP1	338.304	0.203851	0.358065	0.569313	0.569144	0.868045
ENSSSCG00000063467	140.545	0.582289	0.326328	1.78437	0.0743635	0.535392
ENSSSCG00000046029	0.310844	1.79244	4.04581	0.443037	0.657739	NA
ENSSSCG00000055454	0.337767	0.020594	4.08047	0.00504697	0.995973	NA
ENSSSCG00000063380	0.331005	1.87099	4.03857	0.46328	0.643163	NA
CNDP1	668.216	0.437034	0.824359	0.530151	0.596007	0.878475
FEM1B	829.469	0.0294602	0.375964	0.0783591	0.937542	0.984826
ENSSSCG00000060555	1.42823	-0.0679146	2.57546	-0.0263699	0.978962	NA
ITGA11	112.834	0.311018	0.813559	0.382293	0.702244	0.917502
CORO2B	649.375	-0.777763	0.647925	-1.20039	0.229988	0.697066
ENSSSCG00000043563	448.716	-0.389712	0.299631	-1.30064	0.193382	0.672805
ENSSSCG00000062712	0.961393	0.0310685	2.61289	0.0118905	0.990513	NA
ENSSSCG00000051922	0.337767	0.020594	4.08047	0.00504697	0.995973	NA
ENSSSCG00000063237	20.183	-0.218728	0.602133	-0.363255	0.716414	0.924065
ENSSSCG00000063081	19.8819	-0.558908	0.708137	-0.789265	0.429957	0.806121
ENSSSCG00000056226	9.81002	1.14555	0.803553	1.4256	0.153983	0.638244
ENSSSCG00000049234	7.12891	-0.719718	0.881113	-0.816828	0.414027	0.796942
ENSSSCG00000062074	2.41176	-1.39604	1.4186	-0.984098	0.325067	NA
ENSSSCG00000019885	0.993558	2.24102	2.00777	1.11617	0.264349	NA
CNDP2	3352.47	0.189292	0.329868	0.57384	0.566076	0.867004
ENSSSCG00000057267	0.642005	-1.38963	2.71698	-0.511459	0.60903	NA
ENSSSCG00000059807	1.5352	-1.0569	1.68725	-0.626403	0.531051	NA
DIPK1C	10.4541	-0.123157	1.01376	-0.121486	0.903306	0.977188
UACA	1470	-0.575977	0.400229	-1.43912	0.150117	0.635965
MPHOSPH10	384.674	-0.202326	0.405023	-0.499541	0.617398	0.887597
MCEE	248.106	0.193008	0.414045	0.466154	0.641106	0.895313
APBA2	11.6166	-1.30834	1.25489	-1.04259	0.297139	0.738911
FAM189A1	1.93266	-1.46137	1.94591	-0.750997	0.452654	NA
TJP1	2722.62	-0.271526	0.35031	-0.775101	0.43828	0.810895
LARP6	597.022	-1.31616	0.809683	-1.62552	0.104052	0.581741
LRRC49	25.5559	-1.93018	0.825761	-2.33746	0.0194153	0.343415
GALR1	58.7176	-0.179543	0.696766	-0.257681	0.796653	0.944235
THSD4	128.716	-2.13423	0.80088	-2.66486	0.00770215	0.223968
C18orf63	0.633288	-2.789	3.97521	-0.701598	0.48293	NA
CYB5A	5974.11	-1.05105	0.725628	-1.44847	0.147487	0.634915
ENSSSCG00000037781	174.163	-0.300208	0.287279	-1.04501	0.296021	0.738279
TARS3	15.7696	-0.96331	0.681628	-1.41325	0.157583	0.641848
MYO9A	394.967	0.225232	0.292776	0.769297	0.441717	0.812783
CBLN2	16.4618	-0.142794	0.844356	-0.169116	0.865705	0.967595
SENP8	236.167	-0.0747749	0.283305	-0.263938	0.791828	0.943291
ENSSSCG00000026486	1.61765	-1.17828	1.87139	-0.629631	0.528936	NA
ENSSSCG00000024102	0.179445	0.982367	4.08047	0.240748	0.80975	NA
ENSSSCG00000026167	161.588	-0.718262	0.245783	-2.92234	0.00347414	0.15817
GEMIN2	289.734	-0.230473	0.24151	-0.954303	0.33993	0.764763
MTMR10	766.162	-0.231595	0.209289	-1.10658	0.268476	0.721677
TRAPPC6B	493.996	0.0722102	0.203794	0.35433	0.723092	0.926187
FAN1	619.978	0.172443	0.19899	0.866589	0.386167	0.786447
PNN	1384.48	0.126	0.246386	0.511392	0.609077	0.88457
TIMM21	282.397	-0.0212392	0.280943	-0.0755997	0.939738	0.985359
FBXO15	21.1507	-0.615024	0.834846	-0.736691	0.46131	0.823108
ENSSSCG00000004983	820.738	-0.160309	0.528511	-0.303322	0.761645	0.935365
SOCS6	751.197	0.00605281	0.263886	0.0229372	0.9817	0.996157
RTTN	196.962	0.106451	0.544752	0.195412	0.84507	0.959682
CD226	22.1284	-0.268855	0.788901	-0.340797	0.733256	0.928553
DOK6	10.1907	-2.22417	1.05865	-2.10095	0.035645	0.425756
TM2D3	223.294	-0.303663	0.261382	-1.16176	0.245334	0.705406
ENSSSCG00000040252	332.427	0.262946	0.278529	0.944055	0.345142	0.767332
ENSSSCG00000052817	0.152119	-0.941187	4.08047	-0.230656	0.817582	NA
ENSSSCG00000041473	0.165503	0.982367	4.08047	0.240748	0.80975	NA
ENSSSCG00000038208	3.10293	-0.418213	1.01626	-0.411522	0.68069	NA
ENSSSCG00000063266	1.34294	-3.86676	2.95351	-1.30921	0.190464	NA
ENSSSCG00000062837	0.479246	0.877076	2.90984	0.301417	0.763096	NA
ENSSSCG00000041275	1.95778	1.03317	1.54979	0.666652	0.504995	NA
ENSSSCG00000056587	0.941232	-0.0213372	3.51551	-0.00606947	0.995157	NA
ENSSSCG00000060706	46.3655	1.19481	0.736074	1.62322	0.104543	0.582909
ENSSSCG00000054784	3.17794	2.48288	1.32274	1.87707	0.0605082	NA
ENSSSCG00000034069	5.12174	0.919495	1.10967	0.828618	0.407321	0.795473
ENSSSCG00000060600	329.308	-0.35925	0.378947	-0.948022	0.343118	0.766402
ENSSSCG00000060688	9.80961	-0.803925	0.832993	-0.965104	0.334493	0.761739
ENSSSCG00000051884	0.817991	1.91586	2.12441	0.901831	0.367147	NA
ENSSSCG00000051812	0.179445	0.982367	4.08047	0.240748	0.80975	NA
ENSSSCG00000053820	0.307541	0.020594	4.08047	0.00504697	0.995973	NA
ENSSSCG00000055252	0.313744	0.020594	4.08047	0.00504697	0.995973	NA
ENSSSCG00000055622	0.79009	1.85372	2.64178	0.701694	0.48287	NA
ENSSSCG00000061734	1.14557	-1.28687	1.78174	-0.722252	0.47014	NA
ENSSSCG00000048151	0.158322	-0.941187	4.08047	-0.230656	0.817582	NA
ENSSSCG00000060257	0.155422	0.982367	4.08047	0.240748	0.80975	NA
ENSSSCG00000053207	0.469741	-0.781402	3.96089	-0.197279	0.843609	NA
ENSSSCG00000054752	0.183617	-0.941187	4.08047	-0.230656	0.817582	NA
ENSSSCG00000062578	1.80941	-0.253658	1.2659	-0.200378	0.841185	NA
ENSSSCG00000061619	5.29142	0.350223	0.87402	0.400703	0.688639	0.913942
ENSSSCG00000049605	0.694626	0.0786968	2.78739	0.0282332	0.977476	NA
ENSSSCG00000043468	0.165503	0.982367	4.08047	0.240748	0.80975	NA
ENSSSCG00000047328	2.43604	-2.67441	1.71801	-1.55669	0.119544	NA
FBXO33	399.603	0.056341	0.275349	0.204616	0.837872	0.957967
ENSSSCG00000055452	0.152119	-0.941187	4.08047	-0.230656	0.817582	NA
ENSSSCG00000044382	1.99838	0.489509	1.37915	0.354936	0.722637	NA
ENSSSCG00000060848	0.487855	-2.40927	3.83301	-0.62856	0.529637	NA
ENSSSCG00000050768	3.90617	0.0593477	1.05322	0.0563487	0.955064	NA
ENSSSCG00000053104	0.183617	-0.941187	4.08047	-0.230656	0.817582	NA
ENSSSCG00000058598	1.16999	0.426325	1.97715	0.215627	0.829279	NA
ENSSSCG00000060152	13.9224	0.94079	0.867259	1.08479	0.278016	0.7282
ENSSSCG00000053633	4.40057	-0.792279	1.1012	-0.719468	0.471853	NA
ENSSSCG00000062595	2.08885	1.78544	1.85164	0.964246	0.334923	NA
ENSSSCG00000053742	11.0713	-0.502563	0.761584	-0.659892	0.509323	0.845294
ENSSSCG00000060666	0.966232	1.04259	1.81602	0.574106	0.565896	NA
ENSSSCG00000057301	0.183617	-0.941187	4.08047	-0.230656	0.817582	NA
ENSSSCG00000060731	3.79204	-1.46744	1.21564	-1.20714	0.22738	NA
ENSSSCG00000056642	771.369	-1.97172	0.724091	-2.72302	0.0064688	0.209759
ENSSSCG00000052850	1.41628	-2.82845	1.91888	-1.47401	0.140478	NA
ENSSSCG00000062224	22.1733	-0.685876	0.565154	-1.21361	0.224897	0.692864
ENSSSCG00000055457	1.83791	2.23401	1.82796	1.22213	0.221658	NA
ENSSSCG00000049454	1.18308	2.52874	1.96317	1.28809	0.197716	NA
ENSSSCG00000054354	12.0337	0.455187	0.846823	0.537523	0.590906	0.876984
ENSSSCG00000061353	0.152119	-0.941187	4.08047	-0.230656	0.817582	NA
ENSSSCG00000063030	0.469741	-0.781402	3.96089	-0.197279	0.843609	NA
ENSSSCG00000058062	4.48754	-1.53855	1.39038	-1.10657	0.268481	NA
SNORD18	7.30298	0.620319	0.904237	0.686013	0.492705	0.837347
SNORD16	0.644749	1.47126	2.7275	0.539418	0.589599	NA
ENSSSCG00000054231	0.493189	0.921406	2.90399	0.31729	0.751024	NA
IQCH	0.799768	-0.514687	2.6544	-0.1939	0.846254	NA
RGS17	11.6838	-1.67358	1.53886	-1.08754	0.276796	0.727554
MTRF1L	181.214	-0.00515894	0.240248	-0.0214734	0.982868	0.996453
FBXO5	92.932	0.378218	0.634647	0.595951	0.551208	0.860941
LRP11	165.661	-0.611893	0.735795	-0.831608	0.40563	0.795412
PCMT1	1212.49	-0.143922	0.297762	-0.483344	0.628851	0.892251
NUP43	210.339	-0.404975	0.30599	-1.32349	0.185672	0.666063
ENSSSCG00000033739	0.337767	0.020594	4.08047	0.00504697	0.995973	NA
FIG4	511.89	-0.0145689	0.248059	-0.0587316	0.953166	0.98874
ENSSSCG00000004071	442.798	-0.463071	0.378893	-1.22217	0.221643	0.691778
ENSSSCG00000046319	53.8789	-1.22947	0.494306	-2.48726	0.012873	0.287324
ULBP1	20.6132	-0.445413	0.954338	-0.466724	0.640697	0.895151
ENSSSCG00000004096	0.334867	1.8847	4.03734	0.466816	0.640631	NA
ENSSSCG00000041378	0.34912	0.020594	4.08047	0.00504697	0.995973	NA
STXBP5	564.001	0.80554	0.448884	1.79454	0.0727269	0.531649
ENSSSCG00000004404	28.5034	-1.43336	0.842326	-1.70167	0.0888165	0.55902
CDC40	183.631	-0.0914549	0.334169	-0.273678	0.784332	0.942472
METTL24	256.156	-1.38888	0.819496	-1.6948	0.090113	0.561801
DDO	181.224	0.361262	0.781685	0.462159	0.643968	0.897187
SLC22A16	26.0439	4.28403	1.42032	3.01624	0.00255932	0.131916
MARCKS	3016.44	-0.540942	0.313903	-1.72328	0.0848387	0.551295
ARMC2	25.1884	-1.15899	0.660967	-1.75348	0.0795195	0.544257
SESN1	684.708	0.0915138	0.417719	0.21908	0.826588	0.953337
ENSSSCG00000043354	2.54648	1.52173	1.31828	1.15433	0.248365	NA
RAB32	55.6312	-0.824886	0.821842	-1.0037	0.315521	0.753169
ENSSSCG00000052903	0.323824	0.020594	4.08047	0.00504697	0.995973	NA
CEP57L1	49.5328	0.281878	0.341038	0.826529	0.408504	0.796159
ENSSSCG00000052303	626.456	-0.380204	0.429209	-0.885825	0.375712	0.782042
ENSSSCG00000032525	3.96038	1.91251	1.63939	1.1666	0.243371	NA
ENSSSCG00000004415	54.1282	-0.815634	0.698486	-1.16772	0.242921	0.70474
ENSSSCG00000033578	65.6599	0.937979	1.02257	0.91728	0.358996	0.771811
GRM1	1.39196	-1.73457	2.09644	-0.827387	0.408018	NA
CD164	5180.98	-0.227367	0.281572	-0.807493	0.419382	0.799915
SHPRH	276.622	0.284585	0.217961	1.30567	0.191665	0.671925
PPIL6	7.58649	-0.117474	0.852232	-0.137843	0.890364	0.974383
FBXO30	688.897	-0.518625	0.349825	-1.48253	0.1382	0.626693
VIP	5.85281	0.209605	1.65678	0.126514	0.899325	0.976289
SMPD2	844.115	0.678254	0.36865	1.83983	0.065793	0.516903
MICAL1	769.844	-0.118779	0.344922	-0.344366	0.730571	0.927265
MYCT1	570.592	-0.629216	0.843566	-0.745901	0.455727	0.820629
ENSSSCG00000004081	84.4213	0.343739	0.517249	0.664552	0.506337	0.843794
ZBTB24	206.028	-0.0682558	0.223895	-0.304856	0.760476	0.935166
SCML4	31.6963	0.94405	0.830077	1.1373	0.255411	0.712536
ENSSSCG00000049158	55.5021	0.143649	0.687035	0.209086	0.834381	0.955983
SEC63	2272.8	-0.369385	0.214075	-1.72549	0.0844391	0.550765
ENSSSCG00000004082	2131.16	-0.579674	0.500858	-1.15736	0.247125	0.705918
OSTM1	684.401	-0.244555	0.199184	-1.22779	0.219527	0.69105
NR2E1	5.98164	-1.22022	0.823202	-1.48228	0.138265	0.626693
SNX3	2143.16	-0.147744	0.245611	-0.601536	0.547483	0.859508
AFG1L	96.4176	-0.158367	0.314479	-0.503584	0.614554	0.886689
ENSSSCG00000004387	2596.26	-0.210348	0.368502	-0.570819	0.568122	0.867656
ESR1	1322.44	-1.92918	0.766567	-2.51664	0.0118479	0.277053
HDAC2	1209.88	0.252649	0.270995	0.932303	0.35118	0.770377
ENSSSCG00000046251	0.158322	-0.941187	4.08047	-0.230656	0.817582	NA
CCDC170	413.419	-1.66795	0.604901	-2.7574	0.00582638	0.199274
HS3ST5	14.8054	-0.576388	0.812361	-0.709523	0.478	0.831455
FRK	15.5882	0.877317	0.751449	1.1675	0.243008	0.70474
ARMT1	313.757	-0.24357	0.215733	-1.12903	0.258885	0.714848
CDK19	517.387	0.337831	0.346051	0.976246	0.328942	0.760606
RMND1	142.098	0.00236595	0.39768	0.00594939	0.995253	0.99886
AMD1	1498.25	-0.0824312	0.336969	-0.244626	0.806746	0.947995
ZBTB2	249.283	-0.0382178	0.30609	-0.124858	0.900636	0.976832
AKAP12	1793.32	-2.16541	1.06377	-2.0356	0.0417902	0.452644
GTF3C6	654.773	-0.128183	0.291724	-0.439399	0.660372	0.902663
MTHFD1L	207.028	-1.69827	0.713839	-2.37906	0.017357	0.328995
RPF2	325.678	-0.0384932	0.448275	-0.0858697	0.93157	0.982427
SLC16A10	232.707	-1.2248	0.826522	-1.48188	0.138373	0.626693
MFSD4B	24.7268	0.246887	0.602431	0.409817	0.68194	0.911319
REV3L	527.867	-0.14843	0.371986	-0.399021	0.689878	0.914131
TRAF3IP2	1114.15	0.334796	0.356057	0.940287	0.347071	0.767967
FYN	1033.59	-0.0257261	0.578244	-0.04449	0.964514	0.991098
PLEKHG1	606.938	0.457542	0.365807	1.25077	0.211017	0.683763
ENSSSCG00000040966	0.316644	-1.79238	4.04212	-0.443424	0.657459	NA
CCN6	119.474	-0.217068	0.763949	-0.284139	0.776304	0.940198
IYD	38.3447	0.743167	0.795548	0.934158	0.350223	0.769833
PPP1R14C	1398.07	1.22245	0.88418	1.38259	0.166792	0.655557
TUBE1	41.8712	0.211722	0.437593	0.483833	0.628504	0.892007
ENSSSCG00000035574	4.17641	0.610336	1.41144	0.43242	0.665436	NA
FAM229B	2.10113	-2.44163	1.52829	-1.59763	0.110126	NA
LAMA4	2875.21	-0.380421	0.823903	-0.461731	0.644274	0.897227
TFB1M	264.627	-0.0319398	0.301335	-0.105994	0.915587	0.97966
TIAM2	88.1996	-0.367074	0.688096	-0.533463	0.593713	0.877356
SCAF8	869.047	-0.0733117	0.201486	-0.363855	0.715966	0.923695
ATG5	762.634	0.0236367	0.260512	0.0907317	0.927706	0.98173
PTGS1	501.973	0.172959	0.221572	0.780601	0.435037	0.810043
ENSSSCG00000031644	4.7393	-0.17893	1.06873	-0.167422	0.867038	0.967924
PPP2R5E	988.955	0.0411455	0.262876	0.156521	0.875623	0.970126
LATS1	996.386	-0.106667	0.203539	-0.524062	0.600235	0.879798
PDCL	639.065	-0.135348	0.220001	-0.615213	0.538414	0.85674
KATNA1	537.789	-0.140984	0.350717	-0.401987	0.687693	0.913552
PRDM1	791.417	1.24789	0.666263	1.87296	0.0610736	0.506785
GPHB5	0.179445	0.982367	4.08047	0.240748	0.80975	NA
RC3H2	837.562	0.0761561	0.254625	0.299092	0.76487	0.936393
RHOJ	611.039	-1.30977	0.767331	-1.70692	0.0878368	0.557448
GINM1	1394.68	-0.716075	0.257811	-2.77752	0.00547752	0.194248
PPIL4	338.417	-0.138502	0.225432	-0.614386	0.53896	0.857083
CRYBG1	3705.86	1.27484	0.717286	1.77731	0.0755166	0.537272
ZC3H12D	47.5417	-0.887424	0.541221	-1.63967	0.101074	0.577795
ENSSSCG00000061929	0.165503	0.982367	4.08047	0.240748	0.80975	NA
TAB2	1326.72	-0.0292031	0.277415	-0.105269	0.916163	0.97966
SLC24A2	26.5373	1.20052	0.525158	2.28602	0.022253	0.362488
TTLL11	9.08911	0.391279	0.647931	0.603889	0.545917	0.859122
UST	564.666	-0.286993	0.477998	-0.600406	0.548236	0.859903
ACER2	33.124	1.23578	0.745409	1.65786	0.0973457	0.574856
NDUFA8	713.082	0.0755999	0.20398	0.370624	0.710918	0.920781
RPS6	28052.4	-0.0613455	0.27855	-0.220232	0.825691	0.952942
ENSSSCG00000041504	10.9847	0.936563	0.649562	1.44184	0.149348	0.635593
SASH1	2771.57	0.069421	0.341048	0.203552	0.838704	0.95804
ENSSSCG00000005529	4.55132	-0.642592	1.07801	-0.596088	0.551116	NA
RTN4IP1	183.894	0.174976	0.309309	0.565699	0.571599	0.869069
ENSSSCG00000043818	0.165503	0.982367	4.08047	0.240748	0.80975	NA
LHX6	282.379	-0.4431	0.621196	-0.713301	0.47566	0.830621
ENSSSCG00000054030	8.08766	0.0371165	1.58755	0.0233798	0.981347	0.996157
SAMD5	64.0373	1.22273	0.649207	1.88341	0.0596444	0.503386
DENND4C	488.286	0.504071	0.397039	1.26958	0.204236	0.679572
ENSSSCG00000060764	4.95448	1.92647	1.79501	1.07324	0.283165	0.732223
ENSSSCG00000058958	0.679814	2.90209	2.56612	1.13092	0.258088	NA
ENSSSCG00000063189	4.81295	0.404893	1.09606	0.369407	0.711824	0.921608
QRSL1	251.378	0.0582003	0.376491	0.154586	0.877147	0.970823
ENSSSCG00000051971	0.310844	1.79244	4.04581	0.443037	0.657739	NA
ENSSSCG00000056379	2080.41	-0.521655	0.560197	-0.931199	0.351751	0.770641
ENSSSCG00000055261	1.27337	-0.658956	1.67491	-0.393427	0.694004	NA
MTRES1	295.705	-0.0189879	0.202565	-0.0937374	0.925318	0.981369
ENSSSCG00000054787	0.152119	-0.941187	4.08047	-0.230656	0.817582	NA
DMRTA1	0.179445	0.982367	4.08047	0.240748	0.80975	NA
ENSSSCG00000054439	0.456357	-2.32296	4.00098	-0.580598	0.561511	NA
ENSSSCG00000055819	0.310844	1.79244	4.04581	0.443037	0.657739	NA
ENSSSCG00000058871	5.7541	-0.0609697	0.840335	-0.0725541	0.942161	0.9858
CDKN2B	964.884	1.79815	0.838525	2.14441	0.0319997	0.409577
BEND3	133.049	0.112943	0.395249	0.285752	0.775068	0.939621
ENSSSCG00000052174	0.473044	0.876996	2.91812	0.300534	0.76377	NA
ENSSSCG00000052694	7.75424	-0.591553	0.73753	-0.802073	0.422511	0.801943
P14ARF	8.01435	0.548795	1.29206	0.424744	0.671023	0.906957
ENSSSCG00000043123	29.6368	-0.88382	0.649157	-1.36149	0.173359	0.661332
PDSS2	193.659	0.245573	0.285037	0.86155	0.388935	0.787598
RBM18	686.336	-0.102693	0.245894	-0.417629	0.676218	0.909097
ENSSSCG00000054729	26.966	-1.41886	0.821774	-1.72658	0.0842429	0.5507
ENSSSCG00000060161	4.39	1.5285	1.29015	1.18474	0.236119	NA
MRRF	289.19	0.00419534	0.188957	0.0222026	0.982286	0.996157
ELAVL2	5.14806	-3.87681	1.58046	-2.45295	0.0141689	0.300983
ENSSSCG00000059324	15.0375	-0.296882	0.564654	-0.525777	0.599043	0.879332
ENSSSCG00000050987	33.4143	1.05956	0.735075	1.44144	0.149461	0.635656
ENSSSCG00000043730	2.30251	-1.30537	1.65915	-0.786768	0.431418	NA
ENSSSCG00000042025	3.29457	0.980143	1.40744	0.696401	0.486177	NA
SOBP	101.647	-1.08722	0.976866	-1.11297	0.265722	0.719554
ENSSSCG00000042082	1.60523	-1.18593	1.54452	-0.767834	0.442586	NA
ENSSSCG00000054991	2.2457	1.25985	1.92777	0.653526	0.513417	NA
ENSSSCG00000062018	1.74238	1.42739	1.84897	0.77199	0.44012	NA
ENSSSCG00000059819	9.44791	1.33513	0.77917	1.71353	0.0866147	0.554722
ENSSSCG00000053361	5.4793	1.88624	1.09858	1.71698	0.0859827	0.553805
ENSSSCG00000048882	0.310844	1.79244	4.04581	0.443037	0.657739	NA
LHX2	44.3699	4.21301	1.60169	2.63035	0.00852969	0.235376
ENSSSCG00000061000	1.93375	1.01357	1.8449	0.549391	0.582737	NA
ENSSSCG00000043946	0.165503	0.982367	4.08047	0.240748	0.80975	NA
ENSSSCG00000057293	0.179445	0.982367	4.08047	0.240748	0.80975	NA
ENSSSCG00000059436	8.09178	2.12607	1.46289	1.45334	0.146131	0.633701
ENSSSCG00000053486	0.158322	-0.941187	4.08047	-0.230656	0.817582	NA
ENSSSCG00000042456	0.310441	-1.76761	4.04443	-0.437048	0.662077	NA
NEK6	588.958	-0.793981	0.604822	-1.31275	0.189267	0.668981
ENSSSCG00000044325	1.14527	-0.290904	1.97264	-0.14747	0.882761	NA
ENSSSCG00000053033	0.152119	-0.941187	4.08047	-0.230656	0.817582	NA
ENSSSCG00000051997	0.179445	0.982367	4.08047	0.240748	0.80975	NA
ENSSSCG00000060195	0.158322	-0.941187	4.08047	-0.230656	0.817582	NA
PSMB7	1450.56	0.144902	0.345438	0.419475	0.674869	0.908791
ENSSSCG00000041768	0.152119	-0.941187	4.08047	-0.230656	0.817582	NA
ENSSSCG00000057391	0.158322	-0.941187	4.08047	-0.230656	0.817582	NA
ENSSSCG00000042384	0.304238	-1.74252	4.0468	-0.430592	0.666765	NA
ENSSSCG00000052578	1.6438	-3.0525	1.76771	-1.7268	0.084203	NA
ENSSSCG00000045922	0.503269	0.954238	2.90033	0.32901	0.742148	NA
ENSSSCG00000049906	3.87317	1.20852	1.00454	1.20306	0.228953	NA
ENSSSCG00000051113	0.627085	-2.77695	3.60241	-0.770857	0.440792	NA
ENSSSCG00000062711	0.317622	0.020594	4.08047	0.00504697	0.995973	NA
ENSSSCG00000053064	17.5251	1.88195	1.18706	1.58539	0.112878	0.594307
ENSSSCG00000052646	0.155422	0.982367	4.08047	0.240748	0.80975	NA
ADGRD2	0.304238	-1.74252	4.0468	-0.430592	0.666765	NA
SGPP1	925.209	0.0992429	0.299829	0.330998	0.740646	0.931315
ENSSSCG00000055680	0.155422	0.982367	4.08047	0.240748	0.80975	NA
ENSSSCG00000049152	1.9456	-0.855615	1.8418	-0.464553	0.642252	NA
ENSSSCG00000058772	0.158322	-0.941187	4.08047	-0.230656	0.817582	NA
WDR89	129.685	-0.0344045	0.295613	-0.116383	0.907349	0.978479
ENSSSCG00000051913	1.01254	-1.00444	1.82164	-0.551393	0.581364	NA
ENSSSCG00000063343	1.17173	-3.66694	2.12894	-1.72243	0.0849924	NA
ENSSSCG00000054646	22.7278	0.0982888	0.607501	0.161792	0.87147	0.969156
ENSSSCG00000050853	2.11625	-0.588638	1.47535	-0.398982	0.689907	NA
ENSSSCG00000041638	0.310844	1.79244	4.04581	0.443037	0.657739	NA
ENSSSCG00000053219	5.33102	0.313203	0.91928	0.340704	0.733326	0.928573
ENSSSCG00000051118	1.47521	0.369005	1.5994	0.230714	0.817537	NA
ENSSSCG00000041974	2.79719	2.9833	2.54684	1.17137	0.241449	NA
ENSSSCG00000057365	4.72295	-1.34573	1.30374	-1.03221	0.301974	0.742397
ENSSSCG00000048523	1.95736	0.0449726	1.2308	0.0365392	0.970852	NA
ENSSSCG00000053065	4.83459	0.590038	1.07632	0.548198	0.583556	0.872342
ENSSSCG00000062078	0.304238	-1.74252	4.0468	-0.430592	0.666765	NA
ENSSSCG00000055924	565.74	1.01792	1.07573	0.946258	0.344017	0.766402
NR5A1	1.15692	-1.34021	1.73435	-0.77274	0.439676	NA
ENSSSCG00000055717	0.344947	1.92255	4.03401	0.476585	0.633658	NA
TEK	757.213	-0.44095	0.900041	-0.489922	0.624189	0.889988
ENSSSCG00000062520	0.155422	0.982367	4.08047	0.240748	0.80975	NA
ENSSSCG00000059442	0.179445	0.982367	4.08047	0.240748	0.80975	NA
ENSSSCG00000058168	0.158322	-0.941187	4.08047	-0.230656	0.817582	NA
ENSSSCG00000054412	0.158322	-0.941187	4.08047	-0.230656	0.817582	NA
ENSSSCG00000052367	0.158322	-0.941187	4.08047	-0.230656	0.817582	NA
ENSSSCG00000061390	1.11615	2.409	3.40552	0.707383	0.479328	NA
ENSSSCG00000047964	1.38685	-3.90486	2.2258	-1.75437	0.0793679	NA
NR6A1	77.2179	0.17328	0.33369	0.519283	0.603563	0.881932
ENSSSCG00000055198	0.341939	-1.8879	4.03359	-0.468043	0.639754	NA
ENSSSCG00000044366	1.17387	0.450887	1.56675	0.287786	0.773511	NA
ENSSSCG00000060823	0.152119	-0.941187	4.08047	-0.230656	0.817582	NA
ENSSSCG00000054892	0.158322	-0.941187	4.08047	-0.230656	0.817582	NA
ENSSSCG00000034393	0.517212	1.01012	3.90817	0.258464	0.796048	NA
ENSSSCG00000061592	147.66	-1.14912	0.362521	-3.1698	0.00152544	0.0986871
OLFML2A	3822.01	0.110912	0.219139	0.506128	0.612767	0.886453
ENSSSCG00000050067	20.0244	-0.0702301	0.615527	-0.114098	0.909161	0.978479
ENSSSCG00000042842	30.4992	1.15647	0.774259	1.49365	0.135267	0.626175
WDR38	1.16323	1.30652	1.72828	0.755963	0.449671	NA
IFT74	54.1295	0.182313	0.307549	0.592794	0.553319	0.860941
RPL35	13687.2	-0.0928937	0.247033	-0.376037	0.70689	0.919071
LRRC19	1.84711	-0.294632	1.4975	-0.19675	0.844023	NA
ARPC5L	1088.46	0.200751	0.478914	0.41918	0.675085	0.908796
PLAA	639.887	-0.120135	0.404609	-0.296915	0.766531	0.937157
GOLGA1	319.918	0.370025	0.295942	1.25033	0.211178	0.684158
PLIN2	1579.4	0.961989	0.606298	1.58666	0.11259	0.594255
SERPINB13	1079.85	0.675203	0.987091	0.684033	0.493954	0.838349
ZBTB6	223.578	0.0270851	0.358502	0.0755507	0.939777	0.985359
SERPINB12	1655.52	1.31215	0.836767	1.56812	0.116853	0.600858
ZBTB26	169.542	-0.0437777	0.294236	-0.148784	0.881724	0.97224
SERPINB11	549.139	1.04848	0.916156	1.14443	0.252444	0.710321
RABGAP1	1305.23	0.318177	0.352302	0.903136	0.366454	0.775717
HAUS6	486.704	0.127193	0.324215	0.392311	0.694828	0.915206
SERPINB5	14725	0.72742	0.913186	0.796573	0.425699	0.803905
STRBP	360.795	0.291588	0.378077	0.771239	0.440565	0.811968
DSEL	185.926	-0.109125	0.446968	-0.244146	0.807118	0.947995
KDSR	2046.79	0.56574	0.39647	1.42694	0.153596	0.638062
ADAMTSL1	376.77	-0.281061	0.522032	-0.538397	0.590303	0.876467
PHLPP1	747.646	0.731794	0.320536	2.28303	0.0224285	0.363516
HACD4	175.719	-0.0196078	0.349476	-0.0561064	0.955257	0.989146
FOCAD	557.107	0.328159	0.320944	1.02248	0.306554	0.744848
ZCCHC2	559.077	0.111513	0.293822	0.379524	0.704299	0.918371
TNFRSF11A	374.235	-0.331594	0.631051	-0.525463	0.599261	0.879332
ATP8B1	511.751	-0.318709	0.336647	-0.946716	0.343784	0.766402
MLLT3	400.287	-0.930097	0.52342	-1.77696	0.0755745	0.537272
ENSSSCG00000061715	0.790665	0.652993	2.65066	0.246351	0.805411	NA
ENSSSCG00000005135	446.79	0.0285063	0.288816	0.0987005	0.921376	0.980544
SLC51B	18.0737	-1.42752	0.64208	-2.22327	0.0261973	0.387342
CRB2	2.61886	0.397117	1.3397	0.296423	0.766907	NA
RASL12	777.043	-1.82209	0.739997	-2.4623	0.013805	0.298715
IFNE	6.42416	1.00602	1.07914	0.932241	0.351212	0.770377
UBAP1L	13.8365	0.0697261	0.549918	0.126794	0.899104	0.976228
ENSSSCG00000047263	1.32639	1.58643	1.69184	0.937695	0.348401	NA
PDCD7	395.202	0.167633	0.18496	0.906321	0.364766	0.774953
ENSSSCG00000043817	111.595	0.194418	0.408567	0.475854	0.634178	0.893426
CLPX	1390.37	0.237403	0.405081	0.586063	0.557833	0.86227
IFN-ALPHA-8	11.7524	1.24115	0.765379	1.62162	0.104885	0.583183
ENSSSCG00000038797	1.90851	-2.25844	1.78178	-1.26752	0.204968	NA
DENND1A	515.444	-0.157051	0.27788	-0.565174	0.571955	0.869296
CILP	414.615	1.66496	0.987678	1.68573	0.0918481	0.565212
ENSSSCG00000031075	4.5924	-0.235273	1.34837	-0.174487	0.861482	0.965616
ENSSSCG00000051765	0.645711	2.8373	3.57955	0.792639	0.427988	NA
IFN-ALPHA-15	19.4664	0.524303	0.518975	1.01027	0.312368	0.750559
IFN-OMEGA-6	88.6399	-0.13825	0.301612	-0.45837	0.646686	0.898327
IFNA1	0.469166	0.831236	3.96447	0.209672	0.833924	NA
PARP16	619.241	0.399319	0.293168	1.36208	0.173172	0.661332
IFNB1	0.155422	0.982367	4.08047	0.240748	0.80975	NA
ENSSSCG00000054127	17.7397	0.139851	0.611452	0.22872	0.819087	0.950495
ENSSSCG00000052428	0.628465	1.44732	2.73472	0.529239	0.59664	NA
TUSC1	106.802	0.181621	0.426224	0.426116	0.670023	0.906462
RRAGA	1672.24	0.191094	0.296588	0.644309	0.519375	0.848971
IGDCC4	343.108	-0.0837433	0.816051	-0.10262	0.918264	0.980285
ENSSSCG00000031529	0.976313	1.05668	1.81767	0.581338	0.561013	NA
ENSSSCG00000058490	0.165503	0.982367	4.08047	0.240748	0.80975	NA
ENSSSCG00000057273	1.4292	1.03582	1.66195	0.623257	0.533115	NA
ENSSSCG00000056734	7.30329	-1.11576	0.899401	-1.24056	0.214769	0.687972
DPP8	1185.09	0.0312381	0.293027	0.106605	0.915103	0.97966
ENSSSCG00000054285	1.78623	-0.692285	1.95458	-0.354186	0.7232	NA
ENSSSCG00000057864	6.2618	-0.468396	0.890882	-0.525766	0.599051	0.879332
ENSSSCG00000060359	0.152119	-0.941187	4.08047	-0.230656	0.817582	NA
ENSSSCG00000059966	17.0173	0.292382	1.12542	0.259799	0.795019	0.943599
ENSSSCG00000053403	2.82775	3.00911	2.17378	1.38428	0.166273	NA
PAPPA	32.3189	1.01478	0.628885	1.61362	0.106609	0.587388
ENSSSCG00000063341	0.644749	1.47126	2.7275	0.539418	0.589599	NA
ENSSSCG00000059082	8.37229	2.44215	1.01443	2.40742	0.0160658	0.317407
ENSSSCG00000057745	5.46401	0.0767364	0.823319	0.0932038	0.925742	0.981369
ENSSSCG00000033560	71.3841	0.41627	1.18803	0.350386	0.726049	0.926187
ENSSSCG00000052950	5.26926	-0.382663	1.34316	-0.284898	0.775722	0.939891
ENSSSCG00000060748	1.11641	-1.25327	2.55702	-0.490129	0.624043	NA
KLHL9	1037.42	-0.387004	0.195217	-1.98243	0.0474308	0.472808
ENSSSCG00000059717	2.27424	-1.39343	3.227	-0.431804	0.665884	NA
IFN-OMEGA-2	1.48686	-0.400183	1.91907	-0.20853	0.834816	NA
ASTN2	55.1203	0.876486	0.350379	2.50154	0.0123655	0.284126
HACD3	2177.26	-0.183874	0.510612	-0.360105	0.718769	0.924914
IFN-DELTA-1	4.64726	0.00671923	0.975463	0.00688825	0.994504	0.998577
ENSSSCG00000063223	2.00427	1.02932	1.43552	0.717037	0.473351	NA
ENSSSCG00000057852	0.515181	-0.897424	2.88194	-0.311395	0.7555	NA
ENSSSCG00000060250	0.465863	-0.815986	2.92282	-0.279177	0.780109	NA
ENSSSCG00000058698	0.152119	-0.941187	4.08047	-0.230656	0.817582	NA
ENSSSCG00000055846	0.801133	3.14897	3.42149	0.920351	0.35739	NA
TRIM32	395.626	-0.518192	0.28006	-1.85029	0.0642723	0.514577
ENSSSCG00000045802	0.339039	0.020594	4.08047	0.00504697	0.995973	NA
INTS14	372.999	0.0379373	0.271977	0.139487	0.889065	0.974383
ENSSSCG00000049933	0.158322	-0.941187	4.08047	-0.230656	0.817582	NA
TLR4	695.437	0.16122	0.226431	0.712005	0.476462	0.83089
ENSSSCG00000044378	0.608476	-2.73555	3.97777	-0.687711	0.491635	NA
ENSSSCG00000043340	1.13881	-0.408618	1.71398	-0.238403	0.811569	NA
ENSSSCG00000057059	0.708009	1.55709	2.70182	0.576312	0.564404	NA
BRINP1	12.0987	0.616869	0.748508	0.824132	0.409865	0.796527
ENSSSCG00000035890	0.652783	-0.0936279	2.78974	-0.0335616	0.973227	NA
ENSSSCG00000059105	2.06844	1.69091	1.68058	1.00614	0.314347	NA
ENSSSCG00000062238	0.363062	0.020594	4.08047	0.00504697	0.995973	NA
ENSSSCG00000053028	1.15906	2.50263	1.89358	1.32164	0.186289	NA
ENSSSCG00000062358	0.845317	3.21805	2.38323	1.35029	0.176922	NA
ENSSSCG00000057062	39.2914	1.14273	0.618183	1.84852	0.0645265	0.514621
ENSSSCG00000054719	5.91491	2.33917	1.00459	2.32848	0.0198865	0.347136
ENSSSCG00000054559	22.5419	-0.252554	0.885932	-0.285072	0.775589	0.939796
ENSSSCG00000051482	25.9513	-0.331049	0.689533	-0.480106	0.631152	0.892469
ENSSSCG00000042822	6.31356	0.339418	0.771327	0.440044	0.659905	0.902532
ENSSSCG00000053878	0.320924	1.83211	4.0421	0.453257	0.650364	NA
CDK5RAP2	647.106	-0.568131	0.333902	-1.70149	0.0888507	0.55903
ENSSSCG00000055858	13.6691	-0.253364	0.555127	-0.456407	0.648097	0.89905
ENSSSCG00000045852	0.367234	-1.97897	4.02596	-0.491552	0.623036	NA
ENSSSCG00000060537	8.63981	0.72748	1.03717	0.701412	0.483046	0.83377
ENSSSCG00000050165	0.524392	2.52638	3.77819	0.668675	0.503703	NA
CDH7	2.75255	-1.27273	1.82939	-0.695712	0.486609	NA
SLC24A1	24.9185	0.0769753	0.709752	0.108454	0.913636	0.978839
ENSSSCG00000020562	0.521384	-0.917959	2.88019	-0.318715	0.749942	NA
ENSSSCG00000055377	0.304238	-1.74252	4.0468	-0.430592	0.666765	NA
ENSSSCG00000053029	296.371	-0.0834986	0.251442	-0.332079	0.739829	0.931174
DENND4A	550.825	-0.36443	0.317262	-1.14867	0.250692	0.708642
RELCH	1007.25	0.251898	0.337307	0.746792	0.455189	0.820248
PIGN	431.389	0.333776	0.295995	1.12764	0.259473	0.715153
RNF152	29.5337	-0.0258247	0.487839	-0.052937	0.957782	0.989549
CDH20	4.17601	-1.43125	1.30093	-1.10018	0.271255	NA
ENSSSCG00000036234	12.1158	-4.18528	2.11805	-1.97601	0.0481536	0.475278
CDH19	47.2416	-1.59121	0.999217	-1.59245	0.111283	0.592984
PMAIP1	276.26	-0.174537	0.326815	-0.534054	0.593304	0.877299
CCBE1	258.794	-2.18531	0.524817	-4.16395	3.12788e-05	0.0086592
LMAN1	1081.55	-0.400442	0.282249	-1.41875	0.155971	0.639863
ENSSSCG00000034415	773.533	-0.17299	0.211165	-0.819214	0.412664	0.796555
LIPG	467.709	-0.221334	0.809217	-0.273516	0.784456	0.942501
CPLX4	0.766798	-3.069	3.44842	-0.889972	0.373481	NA
RAX	0.183617	-0.941187	4.08047	-0.230656	0.817582	NA
GRP	1.01381	-1.13103	2.59363	-0.43608	0.662779	NA
DYM	1100.07	-0.0480842	0.181402	-0.265071	0.790955	0.943121
SEC11C	1019.85	0.129757	0.372678	0.348175	0.727709	0.926526
ENSSSCG00000004911	8.53026	2.47586	1.52739	1.62098	0.105023	0.583283
ZNF532	852.349	-0.0375404	0.238401	-0.157467	0.874876	0.970126
CXXC1	968.091	0.137532	0.230811	0.595865	0.551265	0.860941
MALT1	501.419	0.390084	0.325702	1.19767	0.231046	0.697066
SKA1	27.0325	-0.314832	0.988449	-0.318511	0.750097	0.93271
ZBTB7C	1131.55	0.910702	0.520974	1.74807	0.0804511	0.545365
CTIF	654.35	-0.016493	0.464047	-0.0355416	0.971648	0.993883
ENSSSCG00000004489	275719	-0.0257872	0.334269	-0.0771449	0.938508	0.984927
MTO1	245.736	0.315122	0.316003	0.997212	0.318661	0.754935
ALPK2	14.4897	0.297467	0.570999	0.520959	0.602396	0.881243
CGAS	47.8119	-0.324641	0.367964	-0.882263	0.377634	0.782722
RNF165	4.45506	0.698462	1.73834	0.401798	0.687832	NA
RPL17-C18orf32	20870.7	-0.156375	0.282344	-0.553847	0.579683	0.871251
NEDD4L	490.837	-0.508192	0.50801	-1.00036	0.317137	0.753765
LOXHD1	0.304238	-1.74252	4.0468	-0.430592	0.666765	NA
ST8SIA5	22.2764	-2.24818	0.669736	-3.35681	0.000788471	0.0680315
PIAS2	716.485	-0.246912	0.212485	-1.16202	0.245228	0.705406
KATNAL2	4.45742	0.61359	0.990171	0.61968	0.535468	NA
HDHD2	353.753	0.0981741	0.356476	0.275402	0.783008	0.941967
ENSSSCG00000060420	1011.84	-0.439476	0.225228	-1.95125	0.0510272	0.483617
C18orf25	527.653	-0.020526	0.266119	-0.0771309	0.938519	0.984927
DCC	0.496508	2.45554	3.99515	0.614631	0.538798	NA
MAPK4	4.59183	-3.70905	1.65183	-2.24542	0.0247413	0.37714
SMAD7	164.267	-0.175812	0.328052	-0.535927	0.592009	0.876984
SMAD2	848.27	-0.188844	0.217276	-0.869146	0.384768	0.785217
CD109	2784.38	-0.106595	0.397322	-0.268285	0.78848	0.942955
SLC17A5	307.407	-0.138158	0.239018	-0.578022	0.563249	0.865622
SETBP1	136.757	-0.76763	0.58703	-1.30765	0.190992	0.67121
MEGF9	1707.67	0.754615	0.534377	1.41214	0.157909	0.642206
ENSSSCG00000045948	0.970405	-0.0191515	1.80114	-0.010633	0.991516	NA
ENSSSCG00000004491	4.18439	-0.874303	1.35988	-0.642926	0.520272	NA
ENSSSCG00000005508	151.402	0.222308	0.426947	0.520692	0.602581	0.881243
SLC14A1	37.5119	-2.40046	0.991682	-2.4206	0.015495	0.312938
PSMD5	799.658	0.103595	0.380466	0.272285	0.785403	0.942589
SIGLEC15	12.9353	-0.494414	0.861974	-0.573583	0.56625	0.867004
EPG5	133.441	0.724688	0.472979	1.53218	0.125479	0.614003
ATP5F1A	6724.45	0.172095	0.410029	0.419716	0.674693	0.908654
ENSSSCG00000039972	414.32	-0.0451621	0.193519	-0.233373	0.815472	0.949769
PHF19	606.954	-0.155977	0.306326	-0.509185	0.610622	0.885271
HAUS1	125.607	0.0249266	0.266713	0.0934585	0.925539	0.981369
TRAF1	236.851	-1.03984	0.564363	-1.84251	0.0654006	0.516903
MRO	8.3936	1.42704	1.50589	0.947638	0.343314	0.766402
C5	48.6949	0.309566	0.339498	0.911836	0.361855	0.773459
ME2	340.158	-0.764294	0.46598	-1.64019	0.100966	0.577795
ENSSSCG00000032297	249.011	0.402347	0.328937	1.22318	0.221263	0.69105
ELAC1	104.086	-0.210316	0.388616	-0.541193	0.588374	0.875497
SMAD4	1116.8	-0.346465	0.247069	-1.4023	0.160826	0.644957
MEX3C	874.309	-0.192244	0.401988	-0.478233	0.632484	0.89289
ACAA2	633.192	0.38004	0.366904	1.0358	0.300294	0.741009
ENSSSCG00000004511	1031.19	0.978375	0.677541	1.44401	0.148736	0.635292
ENSSSCG00000045942	1.33851	2.73663	1.84562	1.48277	0.138135	NA
ENSSSCG00000041158	0.310844	1.79244	4.04581	0.443037	0.657739	NA
ENSSSCG00000055973	77.1652	0.312418	0.32539	0.960133	0.336988	0.762969
MBD1	933.268	0.104333	0.189853	0.549545	0.582631	0.872017
ENSSSCG00000047971	2.62005	1.10288	1.38686	0.795237	0.426476	NA
ENSSSCG00000049462	4.23676	1.76638	1.70693	1.03483	0.30075	NA
ENSSSCG00000052466	0.165503	0.982367	4.08047	0.240748	0.80975	NA
ENSSSCG00000056498	15.4865	0.20522	0.599794	0.34215	0.732238	0.927872
ENSSSCG00000057366	17.6562	0.751744	0.994528	0.755881	0.449721	0.816823
ENSSSCG00000054029	1.85755	1.46022	1.63895	0.89095	0.372956	NA
ENSSSCG00000057248	0.165503	0.982367	4.08047	0.240748	0.80975	NA
ENSSSCG00000062205	3.47129	0.0949572	1.31302	0.0723197	0.942347	NA
ENSSSCG00000061702	0.158322	-0.941187	4.08047	-0.230656	0.817582	NA
ENSSSCG00000055410	0.183617	-0.941187	4.08047	-0.230656	0.817582	NA
ENSSSCG00000055877	1.17514	0.380215	1.71915	0.221164	0.824964	NA
SNORD58	1.62108	1.30658	2.54877	0.512632	0.608209	NA
ENSSSCG00000020045	1.0019	-0.0887336	2.07548	-0.0427532	0.965898	NA
ENSSSCG00000060601	39.9556	-0.092924	0.52287	-0.177719	0.858943	0.964654
VPS4B	1274.26	0.294246	0.402133	0.731715	0.464343	0.825522
TMX3	978.855	0.208631	0.356796	0.584736	0.558725	0.862508
SERPINB8	1369.11	0.715897	0.588618	1.21623	0.223896	0.692487
SERPINB10	3854.44	0.672031	0.971561	0.691702	0.489124	0.835694
SERPINB2	4069.44	1.02264	0.860677	1.18818	0.234763	0.699849
ENSSSCG00000034000	4.1177	3.49868	1.52203	2.29869	0.0215225	NA
SERPINB7	2195.28	1.38478	0.81983	1.6891	0.0912001	0.56389
KBTBD13	0.334867	1.8847	4.03734	0.466816	0.640631	NA
MC4R	2.62289	-4.83499	2.6233	-1.8431	0.0653151	NA
ENSSSCG00000037349	0.8335	0.379807	3.59552	0.105633	0.915873	NA
ENSSSCG00000050338	1.45692	4.01253	2.18578	1.83575	0.0663954	NA
ENSSSCG00000063165	0.316644	-1.79238	4.04212	-0.443424	0.657459	NA
ENSSSCG00000059873	0.307541	0.020594	4.08047	0.00504697	0.995973	NA
ENSSSCG00000063419	0.179445	0.982367	4.08047	0.240748	0.80975	NA
ENSSSCG00000060331	0.307541	0.020594	4.08047	0.00504697	0.995973	NA
ENSSSCG00000039179	15.3579	-0.543429	0.689086	-0.788623	0.430332	0.806121
ENSSSCG00000061814	622.9	-0.717359	0.368314	-1.94768	0.0514531	0.484249
ENSSSCG00000060801	0.304238	-1.74252	4.0468	-0.430592	0.666765	NA
ENSSSCG00000051885	0.646177	-2.81747	2.57853	-1.09267	0.27454	NA
ENSSSCG00000056731	0.155422	0.982367	4.08047	0.240748	0.80975	NA
ENSSSCG00000061175	0.158322	-0.941187	4.08047	-0.230656	0.817582	NA
ENSSSCG00000060219	0.152119	-0.941187	4.08047	-0.230656	0.817582	NA
ENSSSCG00000047145	0.179445	0.982367	4.08047	0.240748	0.80975	NA
ENSSSCG00000056416	0.986378	1.06196	2.51638	0.42202	0.67301	NA
ENSSSCG00000053828	0.65238	-2.82895	2.57754	-1.09754	0.272406	NA
ENSSSCG00000054621	5.59888	0.164162	1.5483	0.106027	0.915561	0.97966
ENSSSCG00000062911	0.482146	-0.830955	3.94586	-0.210589	0.833208	NA
ENSSSCG00000052729	0.313744	0.020594	4.08047	0.00504697	0.995973	NA
ENSSSCG00000060395	0.469166	0.831236	3.96447	0.209672	0.833924	NA
ENSSSCG00000061578	1.13444	-1.37187	2.45278	-0.559311	0.575949	NA
ENSSSCG00000062696	576.166	-1.32126	0.667725	-1.97875	0.0478446	0.473675
RAB14	316.071	0.49546	0.34872	1.42079	0.155376	0.639863
ENSSSCG00000034749	1750.68	-0.060489	0.243397	-0.24852	0.803732	0.946761
GSN	77647.8	-0.0931324	0.619366	-0.150367	0.880475	0.971858
STOM	5155.15	-0.7566	0.547881	-1.38096	0.167292	0.65677
ENSSSCG00000038200	1.03901	2.27129	2.47611	0.917284	0.358994	NA
ENSSSCG00000005518	1674.83	-0.216615	0.376691	-0.575047	0.565259	0.86657
ENSSSCG00000005519	0.456357	-2.32296	4.00098	-0.580598	0.561511	NA
DAB2IP	1131.18	0.166726	0.232969	0.715656	0.474204	0.830308
OR1K1	0.986953	0.128423	2.07219	0.0619745	0.950583	NA
ENSSSCG00000056140	0.152119	-0.941187	4.08047	-0.230656	0.817582	NA
ENSSSCG00000058119	1.10954	0.364861	2.58952	0.140899	0.88795	NA
ENSSSCG00000048491	0.64948	-1.46197	2.24536	-0.651108	0.514976	NA
ENSSSCG00000062052	1.53016	0.965407	1.90761	0.506081	0.6128	NA
ENSSSCG00000062283	0.179445	0.982367	4.08047	0.240748	0.80975	NA
ENSSSCG00000062930	0.158322	-0.941187	4.08047	-0.230656	0.817582	NA
ENSSSCG00000052639	0.490289	2.43867	3.82361	0.637792	0.523609	NA
ENSSSCG00000046469	0.850048	0.616945	2.17554	0.283582	0.776731	NA
ENSSSCG00000056817	2.20298	-0.412903	2.00917	-0.205509	0.837174	NA
ENSSSCG00000061402	16.5061	0.228629	0.861745	0.265309	0.790771	0.943121
ENSSSCG00000053002	21.9503	0.401612	0.866007	0.463752	0.642826	0.896138
ENSSSCG00000056449	64.1018	-0.10279	0.292608	-0.351289	0.725371	0.926187
ENSSSCG00000047129	70.4048	0.807635	0.529366	1.52566	0.127094	0.614921
ENSSSCG00000063161	150.816	-0.242241	0.305423	-0.793131	0.427701	0.805496
ENSSSCG00000048111	5.61185	0.924684	1.20424	0.767854	0.442574	0.81281
ENSSSCG00000018665	0.341939	-1.8879	4.03359	-0.468043	0.639754	NA
AP4E1	603.388	0.320586	0.266731	1.20191	0.229399	0.696684
SPPL2A	1260.01	-0.0976545	0.275681	-0.35423	0.723166	0.926187
TRPM7	1353.14	0.1753	0.311537	0.562692	0.573644	0.869945
ENSSSCG00000034352	0.997328	-0.949678	1.81772	-0.522457	0.601352	NA
USP50	0.316644	-1.79238	4.04212	-0.443424	0.657459	NA
USP8	1082.49	0.35235	0.283095	1.24464	0.213265	0.68664
GABPB1	313.497	0.168567	0.198003	0.851333	0.394584	0.79061
FBN1	3541.51	-1.16112	0.925023	-1.25523	0.209395	0.682821
DTWD1	327.488	-0.513683	0.401138	-1.28056	0.200347	0.677445
FAM227B	25.8722	-0.0466476	0.619411	-0.0753097	0.939968	0.985379
ENSSSCG00000056997	360.074	-0.654251	0.807886	-0.809831	0.418037	0.79873
COPS2	1594.65	0.00593129	0.298241	0.0198876	0.984133	0.996793
SECISBP2L	1350.65	-0.145279	0.288794	-0.503056	0.614925	0.886697
ENSSSCG00000056133	40.6051	-0.148649	0.853251	-0.174215	0.861696	0.965657
CEP152	71.1624	0.0339668	0.564366	0.0601857	0.952008	0.988374
HDC	48.0459	-0.9121	0.901456	-1.01181	0.31163	0.75008
SLC27A2	1.10093	2.42864	2.55568	0.950293	0.341964	NA
ATP8B4	39.5071	-0.0682613	0.435989	-0.156567	0.875586	0.970126
ADAM10	1262.18	-0.602061	0.387248	-1.55471	0.120014	0.608005
LIPC	39.7316	-0.694884	0.923779	-0.752218	0.45192	0.818332
ENSSSCG00000055556	0.645308	0.0718416	2.28641	0.0314211	0.974934	NA
ALDH1A2	109.408	-0.789803	0.603832	-1.30798	0.190879	0.67121
AQP9	23.6759	0.638555	0.505642	1.26286	0.206639	0.680756
POLR2M	918.603	-0.180938	0.247428	-0.731276	0.464611	0.825611
ENSSSCG00000004598	564.127	0.580849	0.532774	1.09024	0.275609	0.7267
CGNL1	1129.46	-0.659167	0.468832	-1.40598	0.159731	0.644255
TCF12	1070.6	-0.357524	0.341908	-1.04567	0.295711	0.738279
ANKS6	139.22	-1.34057	0.768048	-1.74543	0.08091	0.545789
CORO2A	265.906	0.619934	0.428735	1.44596	0.148188	0.635292
TBC1D2	228.724	0.341988	0.280846	1.21771	0.223334	0.692251
GABBR2	7.2553	0.129402	0.723293	0.178906	0.858011	0.964497
PGAP4	618.453	-0.881432	0.495208	-1.77992	0.0750889	0.536721
RNF20	827.898	0.193398	0.205359	0.941754	0.346319	0.767431
GRIN3A	122.47	-0.314814	0.792427	-0.397278	0.691163	0.914365
TGFBR1	1297.33	-0.141341	0.365828	-0.386358	0.699232	0.916422
SMC2	439.501	-0.121129	0.480032	-0.252335	0.800782	0.945842
UNC13B	606.583	-0.180861	0.293114	-0.617032	0.537214	0.856071
ENSSSCG00000005307	0.487855	-2.40927	3.83301	-0.62856	0.529637	NA
ENSSSCG00000058191	2.00773	0.0728095	1.41624	0.0514103	0.958999	NA
ENSSSCG00000041181	0.320924	1.83211	4.0421	0.453257	0.650364	NA
ENSSSCG00000043390	2.32963	-1.89181	1.40796	-1.34365	0.179062	NA
ENSSSCG00000026960	395.814	-0.165537	0.204161	-0.810818	0.41747	0.798511
MNS1	40.0336	-0.346285	0.520418	-0.665398	0.505796	0.843794
TEX9	25.5285	-0.128475	0.508258	-0.252776	0.800442	0.945712
RFX7	460.556	0.189177	0.277199	0.682459	0.494949	0.838756
ENSSSCG00000049979	0.152119	-0.941187	4.08047	-0.230656	0.817582	NA
NEDD4	580.396	0.135699	0.303681	0.446846	0.654986	0.901121
FAM214A	1359.29	0.350298	0.394894	0.887068	0.375043	0.781597
ENSSSCG00000053937	1579.21	-0.615942	0.308212	-1.99844	0.0456695	0.469074
ENSSSCG00000048649	0.341939	-1.8879	4.03359	-0.468043	0.639754	NA
MYO5C	68.5943	-1.32532	1.3027	-1.01737	0.30898	0.747061
GNB5	446.353	-1.29961	0.715567	-1.8162	0.0693401	0.524528
ENSSSCG00000004623	2.06608	-0.27213	2.51243	-0.108314	0.913747	NA
MAPK6	1272.64	0.0570309	0.50548	0.112825	0.910169	0.978479
LEO1	416.368	0.142882	0.258882	0.55192	0.581003	0.871357
TMOD3	1825.16	-0.238328	0.2772	-0.859769	0.389916	0.78852
TMOD2	543.635	-1.72613	0.839636	-2.05581	0.0398006	0.44276
LYSMD2	253.8	-0.250119	0.356658	-0.701286	0.483125	0.833821
SCG3	143.446	-1.13003	0.520595	-2.17065	0.0299574	0.40123
DMXL2	135.939	-0.696409	0.580136	-1.20042	0.229975	0.697066
GLDN	59.6718	-0.196517	0.753062	-0.260958	0.794125	0.943599
TNFAIP8L3	1361.3	-0.317411	0.537861	-0.590136	0.5551	0.861044
PRTG	0.152119	-0.941187	4.08047	-0.230656	0.817582	NA
ENSSSCG00000059778	0.155422	0.982367	4.08047	0.240748	0.80975	NA
PYGO1	115.097	-1.07499	0.549575	-1.95604	0.050461	0.480907
DNAAF4	1.97879	0.0231218	1.34205	0.0172287	0.986254	NA
ENSSSCG00000054223	3.34247	0.00835618	1.00649	0.00830228	0.993376	NA
CCPG1	1438.83	-0.795946	0.39942	-1.99275	0.0462883	0.469803
PIGB	237.51	-0.115241	0.303239	-0.380032	0.703921	0.918295
RAB27A	366.44	-0.157512	0.28905	-0.544929	0.585802	0.873714
RSL24D1	933.873	-0.174139	0.289826	-0.600839	0.547947	0.859685
ENSSSCG00000058800	0.339039	0.020594	4.08047	0.00504697	0.995973	NA
UNC13C	2.01772	-3.3744	2.25839	-1.49416	0.135134	NA
WDR72	3.76954	-0.976693	1.85022	-0.527879	0.597583	NA
ENSSSCG00000004656	232.687	-0.779507	0.336372	-2.3174	0.0204821	0.351923
ENSSSCG00000024660	59.445	-0.0441344	0.499208	-0.0884089	0.929552	0.981835
ENSSSCG00000059295	58.3533	-0.296865	0.359974	-0.824684	0.409551	0.796527
ENSSSCG00000052887	53.0234	-0.588232	0.462595	-1.27159	0.203518	0.679572
ENSSSCG00000056735	3.72027	-0.101482	1.18394	-0.0857155	0.931693	NA
ENSSSCG00000062177	0.950416	-3.37785	2.41416	-1.39918	0.161759	NA
ENSSSCG00000047459	0.152119	-0.941187	4.08047	-0.230656	0.817582	NA
ENSSSCG00000062439	3.11121	-0.481747	1.75773	-0.274073	0.784029	NA
ENSSSCG00000047357	1.66898	-0.508622	2.01839	-0.251994	0.801045	NA
ENSSSCG00000057596	16.8593	-0.03926	0.633948	-0.0619293	0.950619	0.988035
ENSSSCG00000046276	1.68141	1.99634	1.93536	1.03151	0.302302	NA
ENSSSCG00000059103	213.741	-1.57572	0.594943	-2.64853	0.00808437	0.227841
ENSSSCG00000053433	1.60163	-1.08025	1.91538	-0.563985	0.572764	NA
ENSSSCG00000058522	0.46256	-2.34114	3.87107	-0.604779	0.545326	NA
ENSSSCG00000046402	0.155422	0.982367	4.08047	0.240748	0.80975	NA
ENSSSCG00000042551	4.12885	1.16977	1.20818	0.968207	0.332941	NA
ENSSSCG00000057375	0.652488	1.50239	2.2431	0.669782	0.502996	NA
ENSSSCG00000052402	3.07628	-0.0768956	1.15495	-0.0665792	0.946917	NA
ENSSSCG00000057513	0.961952	-0.927903	2.12977	-0.435683	0.663067	NA
ENSSSCG00000063504	10.2412	0.560925	0.70322	0.797653	0.425072	0.803517
ENSSSCG00000059306	0.677675	-2.8736	2.57322	-1.11673	0.264109	NA
ssc-mir-628	0.335736	-1.86432	4.03565	-0.461962	0.644108	NA
GALK2	428.077	-0.0673077	0.198268	-0.339477	0.73425	0.928615
MYO5A	1095.02	0.350045	0.436603	0.801747	0.4227	0.801963
ALG2	296.864	-0.234194	0.328395	-0.713148	0.475754	0.830621
SEC61B	1543.63	-0.355708	0.280092	-1.26997	0.204096	0.679572
NR4A3	108.514	-0.380008	1.05566	-0.359973	0.718868	0.924914
STX17	524.085	0.291366	0.228313	1.27617	0.201896	0.678199
ERP44	1671.1	0.0154221	0.290874	0.05302	0.957716	0.989549
INVS	407.152	-0.0372639	0.491223	-0.0758594	0.939531	0.985359
CYP19A1	0.734468	-2.98833	3.96644	-0.753402	0.451208	NA
TEX10	390.73	0.117995	0.317237	0.371947	0.709933	0.92045
ENSSSCG00000055769	79.5172	-0.720197	0.492823	-1.46137	0.143913	0.632415
MSANTD3-TMEFF1	22.1979	-1.50407	0.693226	-2.16967	0.030032	0.40123
CAVIN4	2.5355	-2.08567	1.4203	-1.46847	0.141978	NA
PLPPR1	25.0614	0.364489	0.872194	0.4179	0.67602	0.909097
ENSSSCG00000042524	2.53212	0.665547	1.35199	0.492273	0.622526	NA
ENSSSCG00000038171	13.0877	1.00585	1.61529	0.622707	0.533477	0.855635
ENSSSCG00000005398	2.0266	0.170401	3.28155	0.0519271	0.958587	NA
BAAT	0.165503	0.982367	4.08047	0.240748	0.80975	NA
MRPL50	273.797	-0.180529	0.22885	-0.788852	0.430198	0.806121
ZNF189	295.296	-0.0488456	0.270373	-0.18066	0.856634	0.964497
ALDOB	0.826894	-1.90055	2.57266	-0.73875	0.460059	NA
GALNT12	47.4827	-1.0676	0.78446	-1.36094	0.173533	0.661332
COL15A1	3997.81	0.701862	0.931786	0.753243	0.451304	0.817711
ALDH1B1	226.447	-0.11765	0.45971	-0.255922	0.798011	0.944951
IGFBPL1	0.155422	0.982367	4.08047	0.240748	0.80975	NA
ENSSSCG00000040711	3.7811	0.744035	1.43692	0.5178	0.604598	NA
CCDC180	1.43684	-0.963336	1.66563	-0.578362	0.56302	NA
ENSSSCG00000053078	354.009	-0.598029	0.549202	-1.08891	0.276195	0.72729
NCBP1	377.289	0.240075	0.348078	0.689717	0.490372	0.836114
TSTD2	370.094	-0.326287	0.297357	-1.09729	0.272514	0.724173
XPA	74.4781	0.131199	0.314446	0.417238	0.676504	0.909097
TRMO	317.297	0.0844562	0.262405	0.321854	0.747563	0.932393
ENSSSCG00000062892	3538.58	-0.253669	0.207633	-1.22172	0.221814	0.691778
TRIM14	61.8652	-0.49263	0.317788	-1.55018	0.121097	0.609276
ENSSSCG00000022044	1.01051	-2.24615	2.49657	-0.899696	0.368282	NA
PHF24	9.43914	-2.84622	1.02321	-2.78165	0.00540827	0.192989
DNAJB5	208.641	-1.04986	0.422668	-2.48389	0.0129958	0.288192
VCP	6853.57	0.0700099	0.290743	0.240796	0.809713	0.948183
C9orf131	0.179445	0.982367	4.08047	0.240748	0.80975	NA
FANCG	405.51	-0.260867	0.621198	-0.419942	0.674528	0.908654
PIGO	704.447	0.38028	0.385424	0.986654	0.323812	0.757927
STOML2	1057.8	0.204973	0.304762	0.672569	0.501221	0.842479
FAM214B	695.356	-0.073681	0.276774	-0.266214	0.790075	0.9431
RUSC2	1339.32	-0.155485	0.439871	-0.353477	0.723731	0.926187
FAM166B	4.91032	-0.560197	0.892532	-0.627649	0.530234	0.855229
TESK1	1044.16	-0.322126	0.361014	-0.892282	0.372242	0.779658
ENSSSCG00000005311	69.1685	-1.98508	0.464863	-4.27024	1.95261e-05	0.00713077
SIT1	48.4422	-1.18565	0.598489	-1.98107	0.0475832	0.473533
CCDC107	168.052	-0.729433	0.460657	-1.58346	0.113317	0.595244
ARHGEF39	92.2395	0.644865	0.800857	0.805219	0.420694	0.800494
ENSSSCG00000059309	259.974	0.23988	0.635789	0.377295	0.705954	0.91886
ENSSSCG00000005316	7618.14	-2.2171	0.904106	-2.45225	0.0141964	0.301196
TLN1	8104.61	-0.59023	0.467079	-1.26366	0.206351	0.680756
CREB3	461.587	-0.293111	0.200123	-1.46466	0.143015	0.631931
GBA2	1079.42	0.600103	0.31839	1.8848	0.0594563	0.503386
RGP1	345.819	-0.0643744	0.212054	-0.303576	0.761451	0.935365
NPR2	551.162	-0.940404	0.690993	-1.36095	0.173531	0.661332
SPAG8	578.788	0.0180468	0.30204	0.0597499	0.952355	0.988386
FAM221B	30.1676	-0.123362	0.673178	-0.183254	0.854599	0.963712
TMEM8B	132.528	-0.352926	0.667847	-0.528453	0.597185	0.87908
RECK	385.923	-1.63163	0.57118	-2.8566	0.00428201	0.175371
GLIPR2	822.916	-0.752134	0.748821	-1.00442	0.315175	0.75291
CLTA	2032.52	-0.135091	0.251321	-0.537523	0.590907	0.876984
GNE	311.426	-0.298557	0.310875	-0.960377	0.336865	0.762934
RNF38	1763.6	-0.538564	0.308897	-1.74351	0.0812451	0.545789
MELK	105.028	-0.0979192	1.08101	-0.090581	0.927826	0.98173
PAX5	14.2591	-2.21607	1.22131	-1.8145	0.0696009	0.525076
ZCCHC7	365.866	0.106184	0.242341	0.43816	0.66127	0.903153
GRHPR	498.648	0.109197	0.29322	0.372408	0.709589	0.920409
ZBTB5	247.831	0.0739021	0.316246	0.233686	0.815229	0.949769
POLR1E	404.632	-0.1128	0.222903	-0.50605	0.612822	0.886453
FBXO10	110.523	-0.366111	0.41488	-0.88245	0.377533	0.782703
ENSSSCG00000058091	582.029	-0.252754	0.276075	-0.915527	0.359915	0.772198
FRMPD1	977.889	2.43013	0.744176	3.26553	0.00109261	0.0833654
TRMT10B	198.069	0.307939	0.337168	0.91331	0.361079	0.773063
EXOSC3	72.624	-0.232143	0.354794	-0.654305	0.512916	0.847103
DCAF10	632.16	0.135991	0.261268	0.520506	0.602711	0.881243
SLC25A51	1262.02	-0.595042	0.234407	-2.5385	0.011133	0.270193
ENSSSCG00000005358	630.401	0.371442	0.371112	1.00089	0.31688	0.753605
FOXE1	12.7474	1.22521	1.37108	0.893611	0.37153	0.779566
ENSSSCG00000055084	39.9578	-0.332126	0.776702	-0.42761	0.668935	0.905764
ENSSSCG00000058329	49.072	-0.166544	0.819453	-0.203238	0.838949	0.958129
ENSSSCG00000052192	0.473044	0.876996	2.91812	0.300534	0.76377	NA
CCIN	0.331005	1.87099	4.03857	0.46328	0.643163	NA
ENSSSCG00000055284	0.317622	0.020594	4.08047	0.00504697	0.995973	NA
ENSSSCG00000059392	4.24266	0.0912763	1.08243	0.0843254	0.932798	NA
ENSSSCG00000053578	0.682714	1.55734	2.72253	0.572018	0.56731	NA
ENSSSCG00000058813	0.66201	2.87036	3.97325	0.72242	0.470036	NA
ENSSSCG00000062097	0.721952	1.59826	3.66235	0.436402	0.662545	NA
ENSSSCG00000056356	6.01483	-1.0206	1.00328	-1.01727	0.309027	0.747061
ENSSSCG00000061681	0.158322	-0.941187	4.08047	-0.230656	0.817582	NA
ENSSSCG00000056508	0.773404	-0.564237	2.65199	-0.21276	0.831514	NA
ENSSSCG00000042369	150.524	-0.227987	0.447356	-0.509632	0.610309	0.885138
ENSSSCG00000056034	0.780585	0.629203	2.65034	0.237404	0.812343	NA
ENSSSCG00000042952	0.666431	1.53431	2.72893	0.562241	0.573952	NA
ENSSSCG00000049199	21.0623	0.778658	0.93432	0.833395	0.404622	0.795257
ENSSSCG00000049366	0.519353	-2.49065	3.79045	-0.657085	0.511126	NA
ENSSSCG00000041432	0.812083	0.542759	2.17073	0.250035	0.80256	NA
RNase_MRP	0.648611	1.47938	2.72671	0.542549	0.58744	NA
ENSSSCG00000063066	108.361	-1.94895	0.844996	-2.30646	0.0210851	0.353688
NANS	400.83	-0.16469	0.50328	-0.327233	0.743492	0.932225
DACT2	164.884	2.78673	0.934962	2.98058	0.00287703	0.140402
ENSSSCG00000037372	79.9253	0.433605	0.346061	1.25297	0.210217	0.683702
PSMB1	2082.7	0.0364275	0.289799	0.125699	0.89997	0.976566
PNLDC1	1.82752	-0.813258	1.30783	-0.621838	0.534048	NA
SMOC2	1086.16	-0.50014	0.49237	-1.01578	0.309734	0.747925
MRPL18	574.048	0.129576	0.236433	0.548043	0.583662	0.872342
TCP1	1038.59	0.254549	0.337695	0.753783	0.450979	0.817555
ACAT2	1443.78	0.285967	0.801803	0.356655	0.72135	0.92583
SNX9	2027.43	-0.406285	0.383497	-1.05942	0.289408	0.734604
WTAP	1533.34	-0.137408	0.198201	-0.693274	0.488138	0.83568
SOD2	701.144	-0.0850587	0.420425	-0.202316	0.83967	0.958437
FNDC1	442.181	0.174639	0.799344	0.218478	0.827057	0.953352
DYNLT1	641.516	-0.0418159	0.230357	-0.181526	0.855954	0.964497
TMEM181	831.224	-0.0825392	0.230009	-0.358851	0.719706	0.924914
ENSSSCG00000031776	115.857	0.356963	0.467261	0.763948	0.444898	0.81281
ENSSSCG00000024019	255.412	0.0795358	0.291252	0.273083	0.78479	0.942589
SERAC1	281.252	0.131766	0.279178	0.47198	0.636941	0.893905
SYNJ2	1027.6	-0.505076	0.350183	-1.44232	0.149212	0.635502
ENSSSCG00000004017	11.9258	-1.17413	1.08369	-1.08346	0.278606	0.7282
ENSSSCG00000004016	17.0848	-0.776318	0.771572	-1.00615	0.314343	0.752453
AFDN	2603.5	0.535244	0.277439	1.92923	0.053702	0.488888
ERMARD	594.312	0.37225	0.280329	1.32791	0.184209	0.666063
DYNLT2	3.69129	0.285037	0.938777	0.303626	0.761413	NA
PHF10	877.854	-0.188591	0.246511	-0.765039	0.444248	0.81281
C6orf120	615.777	-0.132863	0.307065	-0.432689	0.665241	0.904235
WDR27	39.7258	-0.0523108	0.639627	-0.0817833	0.934819	0.983534
THBS2	5152.79	-1.29523	0.673217	-1.92394	0.0543618	0.490336
FAM120B	775.461	0.298587	0.197554	1.51141	0.130683	0.618771
ENSSSCG00000049216	3.35652	0.909302	1.05288	0.863631	0.38779	NA
DLL1	480.412	0.360157	0.364298	0.988633	0.322843	0.757045
TAGAP	180.955	-0.663044	0.648107	-1.02305	0.306286	0.744848
RSPH3	82.4981	-0.182309	0.317778	-0.573699	0.566172	0.867004
EZR	10147.8	0.573261	0.509492	1.12516	0.26052	0.715161
SYTL3	75.7115	-0.26058	0.581854	-0.447844	0.654266	0.900547
QKI	3004.42	-0.0570588	0.314135	-0.181638	0.855867	0.964497
PACRG	9.10095	-0.697795	1.00925	-0.691398	0.489315	0.835694
PRKN	52.211	0.274518	0.53964	0.508706	0.610958	0.885459
ENSSSCG00000053549	0.475944	-0.816186	2.90918	-0.280556	0.779051	NA
AGPAT4	218.523	-0.0421649	0.325854	-0.129398	0.897043	0.976036
MAP3K4	711.163	0.0963016	0.257113	0.37455	0.707995	0.919602
PLG	0.658691	1.50238	2.23977	0.670778	0.502362	NA
SLC22A3	194.985	-0.24069	1.01866	-0.236281	0.813215	0.949543
ENSSSCG00000004024	1882.07	-0.635291	0.368943	-1.72192	0.0850839	0.551295
RPS6KA2	301.535	-0.908048	0.850505	-1.06766	0.285675	0.733874
ENSSSCG00000032916	1636.86	0.236548	0.714257	0.33118	0.740508	0.931315
SFT2D1	831.994	-0.11356	0.320263	-0.354584	0.722901	0.926187
TBXT	0.155422	0.982367	4.08047	0.240748	0.80975	NA
PDE10A	33.8274	-0.726354	1.10062	-0.659948	0.509287	0.845294
ZDHHC14	294.442	-1.11114	0.615823	-1.80431	0.0711823	0.528375
ENSSSCG00000060508	54.7742	0.415995	0.479327	0.867872	0.385464	0.785854
ARID1B	1250.28	0.531464	0.349764	1.51949	0.128639	0.616249
SLC22A2	4.03107	-1.08261	1.45898	-0.742036	0.458066	NA
SLC22A1	0.490289	2.43867	3.82361	0.637792	0.523609	NA
IGF2R	1938.66	0.471106	0.29908	1.57518	0.115215	0.597315
ENSSSCG00000051789	1.03901	2.27129	2.47611	0.917284	0.358994	NA
UNC93A	298.837	2.33985	0.72345	3.23429	0.00121944	0.0875749
ENSSSCG00000022580	0.831374	3.19846	2.46664	1.29669	0.194739	NA
ENSSSCG00000032403	2.50143	-0.21391	1.18707	-0.180201	0.856995	NA
CCR6	7.28779	0.234481	0.882036	0.26584	0.790362	0.943121
CEP43	178.279	0.0941459	0.263387	0.357443	0.72076	0.925775
ENSSSCG00000038527	2.98323	2.30082	1.30402	1.76441	0.0776626	NA
ENSSSCG00000059431	1.40227	1.82756	2.50329	0.730063	0.465352	NA
ENSSSCG00000062590	14.6969	-1.51509	0.554482	-2.73245	0.00628659	0.207589
ENSSSCG00000048769	223.996	0.201096	0.221328	0.908588	0.363568	0.774803
ENSSSCG00000053918	2.13203	-1.08256	1.56229	-0.692932	0.488352	NA
ENSSSCG00000049642	0.310441	-1.76761	4.04443	-0.437048	0.662077	NA
ENSSSCG00000054333	3.48364	0.428002	1.08461	0.394613	0.693129	NA
ENSSSCG00000047676	41.0832	-0.392667	0.525295	-0.747516	0.454752	0.819936
ENSSSCG00000047753	18.0245	0.159327	0.627421	0.253939	0.799542	0.945544
ENSSSCG00000043814	4.53484	2.24677	1.25367	1.79216	0.0731069	NA
ENSSSCG00000048885	5.11645	1.51545	1.56023	0.971304	0.331397	0.761644
ENSSSCG00000062746	0.967505	0.948302	2.1281	0.44561	0.655879	NA
ENSSSCG00000062461	3.09733	-1.12349	1.16651	-0.963119	0.335488	NA
ENSSSCG00000036448	0.697929	1.53411	2.70245	0.567675	0.570256	NA
ENSSSCG00000061338	0.804049	1.89112	2.64515	0.714937	0.474648	NA
ENSSSCG00000052194	0.320924	1.83211	4.0421	0.453257	0.650364	NA
ENSSSCG00000054024	4.84457	1.16645	0.936964	1.24492	0.21316	0.68664
ENSSSCG00000050646	2.99055	0.0416936	1.23883	0.0336555	0.973152	NA
ENSSSCG00000058194	1.35546	-0.754331	1.69305	-0.445545	0.655926	NA
ENSSSCG00000053277	2.92959	-0.313198	1.13091	-0.276943	0.781824	NA
ENSSSCG00000059587	3.8288	0.756453	1.11844	0.676349	0.498819	NA
ENSSSCG00000063447	2.95428	-0.920074	1.26084	-0.729729	0.465556	NA
ENSSSCG00000053023	2.37061	-0.804086	1.43663	-0.559703	0.575682	NA
ENSSSCG00000060777	0.954121	-0.0457178	2.61154	-0.0175061	0.986033	NA
ENSSSCG00000052920	4.35848	-0.499572	0.929851	-0.537261	0.591088	NA
ENSSSCG00000046349	9.07672	-0.302527	0.909014	-0.332807	0.73928	0.93085
ENSSSCG00000061525	19.0672	0.0357158	0.90153	0.0396169	0.968399	0.992343
ENSSSCG00000058060	0.165503	0.982367	4.08047	0.240748	0.80975	NA
ENSSSCG00000046713	1.31205	0.0338057	1.48308	0.0227943	0.981814	NA
ENSSSCG00000057897	0.165503	0.982367	4.08047	0.240748	0.80975	NA
ENSSSCG00000050758	0.155422	0.982367	4.08047	0.240748	0.80975	NA
ENSSSCG00000050351	10.5862	1.53449	0.974537	1.57458	0.115353	0.597315
ENSSSCG00000018530	3.04307	0.636501	1.21016	0.525966	0.598912	NA
ENSSSCG00000018769	0.165503	0.982367	4.08047	0.240748	0.80975	NA
ssc-mir-9824	0.158322	-0.941187	4.08047	-0.230656	0.817582	NA
ssc-mir-9831	0.152119	-0.941187	4.08047	-0.230656	0.817582	NA
COL12A1	9651.7	-2.67335	0.703886	-3.79799	0.000145873	0.0236205
ME1	684.174	1.43957	0.56717	2.53817	0.0111434	0.270193
SH3BGRL2	3216.6	0.681223	0.640867	1.06297	0.287795	0.733874
LCA5	28.4887	-0.221704	0.609295	-0.36387	0.715955	0.923695
ENSSSCG00000046076	0.183617	-0.941187	4.08047	-0.230656	0.817582	NA
ENSSSCG00000004470	845.289	-0.0143982	0.190429	-0.0756093	0.93973	0.985359
PHIP	234.873	0.161053	0.476846	0.337747	0.735554	0.929111
IMPG1	0.344947	1.92255	4.03401	0.476585	0.633658	NA
MYO6	1498.48	0.691174	0.492336	1.40387	0.160358	0.644255
SENP6	1634.66	-0.11207	0.177492	-0.631408	0.527774	0.853871
RWDD2A	118.048	-0.213183	0.370208	-0.575847	0.564719	0.866282
PGM3	257.604	-0.0529609	0.338061	-0.156661	0.875512	0.970126
DOP1A	527.278	0.35055	0.299238	1.17148	0.241407	0.704602
UBE3D	97.386	0.142067	0.342613	0.414657	0.678393	0.909915
ENSSSCG00000053568	0.494058	-2.42494	2.7847	-0.870811	0.383858	NA
TPBG	804.305	0.0087507	0.388941	0.0224988	0.98205	0.996157
IBTK	691.102	-0.518228	0.229189	-2.26114	0.0237506	0.37027
IRAK1BP1	146.849	-0.326003	0.277835	-1.17337	0.240647	0.704602
MEI4	0.693757	2.93178	3.54122	0.827899	0.407727	NA
RWDD1	932.887	-0.0859766	0.271616	-0.316538	0.751594	0.93271
ENSSSCG00000043963	0.522656	-1.01595	3.91047	-0.259802	0.795016	NA
ENSSSCG00000062898	0.152119	-0.941187	4.08047	-0.230656	0.817582	NA
SNAP91	19.0051	-1.40981	0.925467	-1.52335	0.127672	0.614964
PRSS35	60.0597	2.56296	0.84413	3.03622	0.00239566	0.12652
FILIP1	339.562	-0.783917	0.896677	-0.874247	0.381984	0.783766
TMEM30A	2190.33	-0.484673	0.234803	-2.06417	0.0390013	0.43992
COX7A2	931.942	-0.0388667	0.32227	-0.120603	0.904006	0.977249
ENSSSCG00000053516	0.80791	1.89989	2.12311	0.894863	0.37086	NA
NT5DC1	537.225	-0.0593649	0.351992	-0.168654	0.866069	0.967716
COL10A1	12.4726	-2.90399	1.396	-2.08022	0.0375052	0.433787
TSPYL1	384.191	0.207337	0.383631	0.54046	0.58888	0.875793
ENSSSCG00000004441	452.72	-0.400608	0.452832	-0.884671	0.376334	0.782249
CALHM6	11.9206	-0.987823	0.802868	-1.23037	0.218559	0.69105
TRAPPC3L	0.45966	-0.781211	3.98501	-0.196038	0.844581	NA
CALHM5	354.747	-0.439963	0.705656	-0.623482	0.532968	0.8555
CALHM4	4.15246	-0.241574	1.54811	-0.156044	0.875998	NA
TENT5A	1307.61	-0.0121113	0.507354	-0.0238714	0.980955	0.996157
ENSSSCG00000046535	0.152119	-0.941187	4.08047	-0.230656	0.817582	NA
BCKDHB	378.252	0.156139	0.328112	0.475871	0.634166	0.893426
TTK	336.233	1.03559	0.935267	1.10727	0.268177	0.721677
ELOVL4	2957.69	1.26264	0.808168	1.56234	0.118207	0.604674
ENSSSCG00000049571	1.04705	0.947753	2.07658	0.456401	0.648102	NA
HTR1B	101.012	1.25204	0.488753	2.5617	0.010416	0.262869
ENSSSCG00000047800	295.562	-1.26099	0.686118	-1.83787	0.0660819	0.517677
ENSSSCG00000059566	1.5037	-1.02152	1.59957	-0.638623	0.523068	NA
ENSSSCG00000058663	3.5094	1.06726	1.13215	0.942682	0.345844	NA
ENSSSCG00000062560	582.952	-0.313618	0.401565	-0.780987	0.43481	0.810008
ENSSSCG00000050897	0.155422	0.982367	4.08047	0.240748	0.80975	NA
ENSSSCG00000063246	0.798699	-0.622858	2.65251	-0.234818	0.81435	NA
ENSSSCG00000054792	0.501239	-0.897548	2.89903	-0.309603	0.756863	NA
ENSSSCG00000060383	0.152119	-0.941187	4.08047	-0.230656	0.817582	NA
ENSSSCG00000057254	0.655388	0.0989369	2.28633	0.0432733	0.965484	NA
ENSSSCG00000045384	0.935432	2.14681	3.50157	0.613099	0.539811	NA
ENSSSCG00000053627	1.46763	-1.6892	1.89039	-0.893573	0.371551	NA
ENSSSCG00000063024	1.64335	-0.0229326	1.51772	-0.0151099	0.987945	NA
ENSSSCG00000059782	0.811105	-0.652343	2.6532	-0.24587	0.805783	NA
ENSSSCG00000056387	0.483124	0.909274	3.95373	0.229979	0.818108	NA
ENSSSCG00000054905	0.155422	0.982367	4.08047	0.240748	0.80975	NA
ENSSSCG00000052113	0.155422	0.982367	4.08047	0.240748	0.80975	NA
ENSSSCG00000055630	0.639105	0.104561	2.79024	0.0374736	0.970107	NA
ENSSSCG00000050407	0.980578	3.43814	3.18051	1.081	0.279695	NA
ENSSSCG00000053341	0.179445	0.982367	4.08047	0.240748	0.80975	NA
ENSSSCG00000059851	0.179445	0.982367	4.08047	0.240748	0.80975	NA
ENSSSCG00000054079	0.507442	-0.918157	2.897	-0.316934	0.751294	NA
ENSSSCG00000059005	0.152119	-0.941187	4.08047	-0.230656	0.817582	NA
ENSSSCG00000051809	40.5936	-0.905792	0.50993	-1.7763	0.0756827	0.537272
ENSSSCG00000061057	95.533	-0.347504	0.451608	-0.769483	0.441607	0.812701
ENSSSCG00000055281	0.862159	1.98292	2.63919	0.751338	0.452449	NA
ENSSSCG00000061232	0.152119	-0.941187	4.08047	-0.230656	0.817582	NA
ENSSSCG00000054854	0.152119	-0.941187	4.08047	-0.230656	0.817582	NA
UBE2J1	1068.68	-0.311756	0.256557	-1.21515	0.224308	0.692612
RRAGD	153.409	0.20984	0.24921	0.842021	0.399776	0.793238
ANKRD6	170.88	0.181356	0.400032	0.453353	0.650295	0.899655
ENSSSCG00000004324	225.913	-0.139155	0.264949	-0.525213	0.599435	0.879332
MDN1	879.48	0.434753	0.35371	1.22912	0.219026	0.69105
ENSSSCG00000054691	0.152119	-0.941187	4.08047	-0.230656	0.817582	NA
MAP3K7	704.757	0.0399218	0.260874	0.153031	0.878374	0.971121
NT5E	633.468	-1.84234	0.695406	-2.6493	0.00806594	0.227841
SNX14	1198.19	0.0314986	0.245789	0.128153	0.898028	0.976036
ENSSSCG00000004294	3627.82	-0.0831412	0.3744	-0.222065	0.824263	0.952397
RNGTT	552.803	-0.148573	0.194449	-0.764072	0.444824	0.81281
PNRC1	2285.05	0.182222	0.342979	0.531293	0.595216	0.878299
SRSF12	40.0556	0.326118	0.507207	0.642969	0.520244	0.848971
PM20D2	529.074	-0.00578253	0.219104	-0.0263917	0.978945	0.995867
GABRR2	2.13483	2.51454	1.78697	1.40716	0.159381	NA
CYB5R4	136.792	-0.470754	0.233636	-2.01491	0.0439144	0.463072
MRAP2	135.683	-2.33351	0.754548	-3.09259	0.00198418	0.112464
CEP162	229.108	0.203402	0.322754	0.630206	0.52856	0.854417
TBX18	127.451	-1.12731	0.953061	-1.18283	0.236875	0.70135
ENSSSCG00000051834	84.0508	-0.415291	0.292702	-1.41882	0.155953	0.639863
B3GAT2	29.5777	0.415783	0.498884	0.833425	0.404605	0.795257
OGFRL1	462.289	-0.687642	0.367419	-1.87155	0.0612691	0.506785
HTR1E	2.97735	-2.3071	1.36852	-1.68584	0.0918273	NA
CGA	3.82372	-3.40387	1.37305	-2.47906	0.013173	NA
ZNF292	434.461	0.138709	0.356056	0.389571	0.696854	0.915904
SMIM8	70.8094	-0.0205822	0.355446	-0.0579051	0.953824	0.988891
ENSSSCG00000055021	4.7638	-0.512448	1.32452	-0.386892	0.698836	0.916413
ENSSSCG00000004302	0.948987	0.0549266	2.06455	0.0266046	0.978775	NA
SLC35A1	498.165	-0.103343	0.286441	-0.360784	0.718261	0.924914
RARS2	245.654	-0.0298964	0.378813	-0.0789212	0.937095	0.984779
ORC3	217.878	0.107031	0.269671	0.396894	0.691446	0.914365
ENSSSCG00000004307	876.41	0.234832	0.306409	0.766401	0.443438	0.81281
SPACA1	4.81038	-0.619996	1.77977	-0.348358	0.727571	0.92652
CNR1	15.7126	-1.00377	0.81573	-1.23052	0.218504	0.69105
ENSSSCG00000050040	7.36164	-0.349133	0.88369	-0.395085	0.69278	0.91496
CASP8AP2	269.396	0.141709	0.361473	0.392034	0.695033	0.915206
GJA10	5.95982	1.2346	0.847014	1.45759	0.144953	0.632749
BACH2	72.736	0.886893	0.625002	1.41903	0.155892	0.639863
ENSSSCG00000044269	0.165503	0.982367	4.08047	0.240748	0.80975	NA
RIMS1	33.5808	-3.1528	1.0183	-3.09615	0.00196048	0.112166
KCNQ5	32.6142	0.0720775	0.911393	0.079085	0.936965	0.984757
ENSSSCG00000046325	0.630388	-1.41409	3.75075	-0.377016	0.706162	NA
ENSSSCG00000053554	0.532737	-1.01572	3.89035	-0.261088	0.794025	NA
ENSSSCG00000058051	0.155422	0.982367	4.08047	0.240748	0.80975	NA
EPHA7	23.2597	-0.359129	0.878951	-0.408589	0.682842	0.911781
ENSSSCG00000057761	0.618385	1.41291	3.75733	0.37604	0.706887	NA
ENSSSCG00000029003	344.658	-0.131351	0.320241	-0.410162	0.681687	0.911319
ENSSSCG00000057380	0.973707	0.931423	2.12914	0.437465	0.661774	NA
ENSSSCG00000051452	0.661591	0.0952321	2.78916	0.0341436	0.972763	NA
ENSSSCG00000057615	0.367234	-1.97897	4.02596	-0.491552	0.623036	NA
GJB7	1.85628	1.53138	1.92401	0.795934	0.42607	NA
ENSSSCG00000052938	1.64544	-0.547926	1.84222	-0.297427	0.76614	NA
ENSSSCG00000058397	141.457	0.381703	0.805323	0.473974	0.635518	0.893458
ENSSSCG00000061089	31.5661	0.0431984	0.759428	0.0568827	0.954639	0.98913
ENSSSCG00000062109	0.655388	0.0989369	2.28633	0.0432733	0.965484	NA
ENSSSCG00000042663	22.9421	0.56837	0.636252	0.893311	0.371691	0.779566
ENSSSCG00000060021	0.158322	-0.941187	4.08047	-0.230656	0.817582	NA
ENSSSCG00000050380	1.44401	-0.302153	1.64917	-0.183215	0.854629	NA
ENSSSCG00000062121	0.70297	-2.9267	3.54075	-0.826578	0.408476	NA
ENSSSCG00000060869	0.770504	0.609268	3.60845	0.168845	0.865919	NA
ENSSSCG00000057321	0.317622	0.020594	4.08047	0.00504697	0.995973	NA
ENSSSCG00000063094	4.72928	0.69561	0.999964	0.695635	0.486657	0.835327
ENSSSCG00000043035	0.155422	0.982367	4.08047	0.240748	0.80975	NA
ENSSSCG00000045140	0.866331	0.620322	2.17795	0.28482	0.775782	NA
ENSSSCG00000060394	7.21403	0.828525	0.71015	1.16669	0.243335	0.70474
ENSSSCG00000051930	18.6268	0.0412869	0.690256	0.059814	0.952304	0.988386
ENSSSCG00000060291	9.06872	1.03578	0.731677	1.41563	0.156885	0.641135
ENSSSCG00000058267	1.69108	0.647774	1.45208	0.4461	0.655525	NA
ENSSSCG00000053987	0.155422	0.982367	4.08047	0.240748	0.80975	NA
ENSSSCG00000048267	0.155422	0.982367	4.08047	0.240748	0.80975	NA
ENSSSCG00000053017	0.517212	1.01012	3.90817	0.258464	0.796048	NA
ENSSSCG00000061618	0.648611	1.47938	2.72671	0.542549	0.58744	NA
ENSSSCG00000058739	0.462963	0.831131	3.97924	0.208867	0.834552	NA
ENSSSCG00000062627	0.165503	0.982367	4.08047	0.240748	0.80975	NA
ENSSSCG00000060016	0.183617	-0.941187	4.08047	-0.230656	0.817582	NA
ENSSSCG00000044841	1038	0.18949	0.226952	0.834934	0.403755	0.795257
ENSSSCG00000038663	14.2876	4.09174	1.49474	2.73743	0.00619216	0.206067
ENSSSCG00000037982	1.48248	0.419819	1.91724	0.21897	0.826673	NA
ENSSSCG00000019135	0.641446	0.0728289	2.79059	0.0260981	0.979179	NA
SMAP1	342.56	0.347221	0.419334	0.828028	0.407654	0.795473
FREM1	39.8571	-3.01276	0.940192	-3.20441	0.00135339	0.0925484
CER1	0.155422	0.982367	4.08047	0.240748	0.80975	NA
ZDHHC21	280.903	0.649121	0.346188	1.87506	0.0607851	0.506648
SH3GL2	77.4744	-0.53002	0.501504	-1.05686	0.290575	0.735199
CNTLN	217.485	-1.0142	0.25529	-3.97273	7.10533e-05	0.0154375
ENSSSCG00000044896	0.475944	-0.816186	2.90918	-0.280556	0.779051	NA
BNC2	125.654	-0.268013	0.361578	-0.74123	0.458554	0.82141
CCDC171	7.80114	-0.469663	0.818814	-0.57359	0.566245	0.867004
PSIP1	386.61	-0.522018	0.28896	-1.80654	0.0708336	0.527364
SNAPC3	598.548	-0.186049	0.229145	-0.811929	0.416833	0.798369
TTC39B	415.801	0.53177	0.519474	1.02367	0.305991	0.744848
PTPRD	35.9973	-1.49748	0.924134	-1.62042	0.105143	0.583283
DMAC1	131.45	0.0200496	0.232566	0.0862105	0.931299	0.982353
ENSSSCG00000062923	0.331005	1.87099	4.03857	0.46328	0.643163	NA
NFIB	1002.77	0.239142	0.472064	0.506588	0.612444	0.886453
MPDZ	609.752	-0.95693	0.730272	-1.31038	0.190069	0.670178
LURAP1L	183.603	-0.59257	0.600425	-0.986917	0.323683	0.757924
ENSSSCG00000046128	0.479246	0.877076	2.90984	0.301417	0.763096	NA
ENSSSCG00000046197	0.34912	0.020594	4.08047	0.00504697	0.995973	NA
ENSSSCG00000054669	13.8571	1.29434	1.36632	0.947321	0.343475	0.766402
ENSSSCG00000057687	0.179445	0.982367	4.08047	0.240748	0.80975	NA
ENSSSCG00000046665	0.155422	0.982367	4.08047	0.240748	0.80975	NA
ENSSSCG00000054565	0.767201	-0.550656	3.61191	-0.152456	0.878828	NA
ENSSSCG00000041617	5.66224	0.438447	0.851905	0.514666	0.606786	0.883591
ENSSSCG00000061754	131.338	0.46073	0.495859	0.929154	0.352809	0.771072
ENSSSCG00000052760	0.331005	1.87099	4.03857	0.46328	0.643163	NA
ENSSSCG00000059040	0.158322	-0.941187	4.08047	-0.230656	0.817582	NA
ENSSSCG00000061808	0.316644	-1.79238	4.04212	-0.443424	0.657459	NA
ENSSSCG00000052256	0.158322	-0.941187	4.08047	-0.230656	0.817582	NA
ENSSSCG00000061890	71.3977	-0.85586	1.13652	-0.753056	0.451416	0.817829
ENSSSCG00000053877	0.550851	-2.57006	3.98631	-0.644722	0.519107	NA
ENSSSCG00000052866	0.165503	0.982367	4.08047	0.240748	0.80975	NA
ENSSSCG00000057962	0.734468	-2.98833	3.96644	-0.753402	0.451208	NA
ENSSSCG00000062118	0.978144	0.0124056	2.06982	0.00599357	0.995218	NA
ENSSSCG00000054940	3.97202	-0.291811	1.38046	-0.211387	0.832585	NA
ENSSSCG00000054761	4.96937	-1.39707	1.06763	-1.30858	0.190676	0.671062
ENSSSCG00000063121	0.310441	-1.76761	4.04443	-0.437048	0.662077	NA
ENSSSCG00000057969	0.158322	-0.941187	4.08047	-0.230656	0.817582	NA
ECPAS	2403.11	0.227317	0.276622	0.82176	0.411214	0.796555
ENSSSCG00000045611	0.310844	1.79244	4.04581	0.443037	0.657739	NA
ZNF483	20.4814	-0.435904	0.519203	-0.839563	0.401153	0.793572
PTGR1	1216.25	0.46183	0.591403	0.780906	0.434858	0.810008
ENSSSCG00000042365	23.8413	0.734685	0.602307	1.21979	0.222546	0.691864
ENSSSCG00000005460	480.611	-0.232277	0.172537	-1.34625	0.178223	0.662385
GNG10	1681.2	-0.935849	0.396897	-2.35791	0.0183781	0.334863
SHOC1	0.977275	2.227	2.48991	0.894408	0.371103	NA
UGCG	245.646	0.82034	0.521004	1.57454	0.115363	0.597315
PTBP3	2980.62	0.315095	0.455355	0.691977	0.488952	0.835694
HSDL2	800.254	0.305367	0.419036	0.728736	0.466163	0.825976
KIAA1958	11.2909	-0.81943	1.01185	-0.809837	0.418034	0.79873
INIP	552.01	-0.31822	0.232469	-1.36887	0.17104	0.659271
SNX30	137.095	0.428145	0.232454	1.84184	0.0654981	0.516903
SLC46A2	602.017	1.4541	0.671236	2.1663	0.030288	0.403008
ENSSSCG00000005473	0.331564	0.020594	4.08047	0.00504697	0.995973	NA
SAL1	72.3459	-0.813845	0.828743	-0.982023	0.326088	0.759324
ENSSSCG00000047560	2.69868	-1.64801	1.57918	-1.04358	0.296679	NA
ENSSSCG00000005475	37.7199	-0.97372	0.754158	-1.29113	0.196657	0.675489
ENSSSCG00000005440	296.79	-0.0939302	0.256602	-0.366054	0.714325	0.922908
ELP1	401.959	-0.0338574	0.258115	-0.131172	0.895639	0.975738
TMEM245	1531.97	-0.317565	0.218322	-1.45457	0.145789	0.633552
ENSSSCG00000048786	0.969132	0.0612286	1.80108	0.0339956	0.972881	NA
FRRS1L	1.79185	-0.216038	1.30169	-0.165968	0.868182	NA
EPB41L4B	594.826	0.567825	0.567517	1.00054	0.317048	0.753765
PTPN3	1106.01	0.643508	0.503893	1.27707	0.201576	0.678199
PALM2AKAP2	2182.37	-0.876559	0.835534	-1.0491	0.294132	0.737851
C9orf152	85.7398	0.059597	0.937573	0.0635652	0.949316	0.987699
ENSSSCG00000005453	3424.77	-0.172002	0.469359	-0.366462	0.71402	0.922908
TXNDC8	1.50274	-1.81122	1.80005	-1.00621	0.314317	NA
SVEP1	2396.87	-2.06785	0.618657	-3.34249	0.000830306	0.0702038
MUSK	0.734468	-2.98833	3.96644	-0.753402	0.451208	NA
LPAR1	722.642	-1.28922	0.73695	-1.74939	0.0802231	0.544821
ENSSSCG00000063540	0.532737	-1.01572	3.89035	-0.261088	0.794025	NA
ENSSSCG00000057569	0.307541	0.020594	4.08047	0.00504697	0.995973	NA
ENSSSCG00000035397	0.165503	0.982367	4.08047	0.240748	0.80975	NA
ENSSSCG00000053039	338.676	0.293134	0.278193	1.05371	0.292017	0.736341
NIPSNAP3A	165.525	0.440529	0.34943	1.26071	0.207414	0.681481
ABCA1	1060.94	-0.911892	0.625014	-1.45899	0.144567	0.632415
SLC44A1	3294.44	0.2773	0.31312	0.885603	0.375831	0.782101
FSD1L	259.467	-0.031115	0.220852	-0.140886	0.88796	0.974383
TAL2	0.152119	-0.941187	4.08047	-0.230656	0.817582	NA
TMEM38B	138.038	-0.490147	0.264054	-1.85624	0.0634192	0.511843
ZNF462	222.239	0.625039	0.427086	1.4635	0.143332	0.632207
RAD23B	3498.9	0.37803	0.354518	1.06632	0.286279	0.733874
KLF4	9332.2	0.489965	0.501558	0.976886	0.328625	0.760606
COL27A1	497.446	0.254186	0.576725	0.440741	0.659401	0.902532
ENSSSCG00000005488	3.01205	-0.393737	1.36003	-0.289506	0.772194	NA
AKNA	135.746	-0.61776	0.390918	-1.58028	0.114043	0.595869
WHRN	43.5832	-0.438067	0.660309	-0.663427	0.507057	0.843955
ENSSSCG00000053522	1785.9	-0.249261	0.284261	-0.876871	0.380556	0.783766
FAM189A2	380.171	-0.447438	0.584696	-0.765249	0.444123	0.81281
ENSSSCG00000048487	2.10027	-1.13828	1.27822	-0.890521	0.373186	NA
VLDLR	1205.94	-0.565703	0.411627	-1.37431	0.169345	0.658742
TEX48	0.456357	-2.32296	4.00098	-0.580598	0.561511	NA
ENSSSCG00000059646	19.5595	1.28146	0.49688	2.57901	0.00990842	0.257259
TNFSF8	21.8438	-0.459511	0.558079	-0.823379	0.410293	0.796555
TNC	846.384	0.0650324	0.470421	0.138243	0.890048	0.974383
ENSSSCG00000041522	2.35524	0.419966	1.27809	0.328588	0.742467	NA
SMARCA2	2580.06	-0.743962	0.30555	-2.43483	0.0148987	0.306954
SUSD1	20.923	0.331437	0.503007	0.658911	0.509953	0.845684
FKBP15	825.384	-0.0328834	0.202945	-0.162031	0.871281	0.969156
KDM4C	327.471	0.118458	0.203658	0.581649	0.560803	0.864292
GLDC	6.9718	0.123633	0.854458	0.144691	0.884954	0.973802
UHRF2	537.749	-0.203839	0.216086	-0.943325	0.345515	0.767332
RANBP6	696.81	-0.279483	0.24383	-1.14622	0.251703	0.70988
TPD52L3	0.158322	-0.941187	4.08047	-0.230656	0.817582	NA
IL33	1310.73	-0.796359	0.364091	-2.18725	0.0287242	0.394165
DMRT2	53.0287	1.25109	0.924213	1.35368	0.175837	0.661332
DMRT3	10.291	-0.858308	1.54452	-0.55571	0.578409	0.870458
KANK1	3984.86	0.0503151	0.432013	0.116467	0.907283	0.978479
ZNF618	66.8446	-0.252459	0.457586	-0.551719	0.581141	0.871381
AMBP	1.57693	1.09956	2.57416	0.427152	0.669269	NA
ENSSSCG00000004185	0.155422	0.982367	4.08047	0.240748	0.80975	NA
SLC31A2	284.175	0.629171	0.408915	1.53864	0.123893	0.611943
DOCK8	595.651	0.153495	0.416121	0.368871	0.712224	0.921886
KIF12	44.8083	0.974233	0.668003	1.45843	0.144723	0.632415
SLC31A1	1188.74	-0.547328	0.554261	-0.987491	0.323402	0.757591
SMPDL3A	686.204	-0.921845	0.561841	-1.64076	0.100848	0.577795
CDC26	368.427	0.0789914	0.228491	0.345709	0.729561	0.92702
PRPF4	586.077	-0.00344525	0.291694	-0.0118112	0.990576	0.997734
FABP7	23.4403	-2.73863	1.07731	-2.54209	0.0110191	0.270193
PKIB	301.02	0.35007	0.405648	0.862989	0.388144	0.787226
RNF183	28.8006	-0.507603	0.482071	-1.05296	0.292358	0.736379
WDR31	126.436	0.720247	0.421505	1.70875	0.0874973	0.55643
ENSSSCG00000005241	220.067	0.249262	0.351486	0.709166	0.478221	0.831455
SERINC1	4924.71	-0.581209	0.35847	-1.62136	0.104941	0.583283
BSPRY	76.2986	0.0449475	0.570414	0.078798	0.937193	0.984779
HDHD3	150.76	0.0999941	0.340179	0.293945	0.7688	0.937815
ALAD	480.811	-0.0604004	0.439949	-0.13729	0.890802	0.974516
ENSSSCG00000005478	721.393	-0.151428	0.160693	-0.942344	0.346016	0.767431
C9orf43	3.53366	0.815619	1.14854	0.710133	0.477622	NA
PERP	47787.7	0.963414	0.883726	1.09017	0.275637	0.7267
HSF2	314.638	-0.221664	0.286286	-0.774274	0.438769	0.811375
SLC2A12	531.481	0.185155	0.42826	0.432343	0.665492	0.904251
PGM5	1531.71	-2.03229	0.761715	-2.66804	0.00762944	0.222775
ENSSSCG00000053708	1641.16	-0.970663	0.755267	-1.28519	0.198725	0.676725
RNF217	99.3063	-0.367774	0.361633	-1.01698	0.309162	0.747072
TBPL1	172.292	-0.281293	0.325784	-0.863433	0.387899	0.787226
NKAIN2	9.65438	-1.08001	1.10029	-0.981568	0.326313	0.759641
TMEM252	1.08095	-0.393781	2.55899	-0.153881	0.877703	NA
PIP5K1B	52.0735	-1.16093	0.827294	-1.40329	0.160531	0.644255
ACTL7B	0.304238	-1.74252	4.0468	-0.430592	0.666765	NA
TRDN	1.42219	-1.6837	1.99104	-0.84564	0.397754	NA
TCF21	204.566	-5.17594	1.26964	-4.07669	4.56821e-05	0.0114052
ENSSSCG00000050248	0.179445	0.982367	4.08047	0.240748	0.80975	NA
EYA4	153.786	-3.50724	1.20528	-2.9099	0.00361548	0.161005
FXN	186.497	0.0730733	0.291203	0.250936	0.801864	0.946128
ENSSSCG00000005247	1512.92	0.527084	0.400039	1.31758	0.187643	0.668058
TNFAIP3	540.931	0.416629	0.591794	0.70401	0.481427	0.832855
OR2K2	0.307541	0.020594	4.08047	0.00504697	0.995973	NA
ENSSSCG00000053150	3.15092	1.52534	1.06305	1.43487	0.151325	NA
ENSSSCG00000048390	0.304238	-1.74252	4.0468	-0.430592	0.666765	NA
ENSSSCG00000005432	2.2054	-1.72903	1.44434	-1.1971	0.231266	NA
ENSSSCG00000051392	6.50919	1.04163	1.08615	0.95901	0.337554	0.763176
CLVS2	3.91422	-1.94284	1.38956	-1.39817	0.162063	NA
ENSSSCG00000060565	0.367234	-1.97897	4.02596	-0.491552	0.623036	NA
REPS1	871.437	0.143055	0.235511	0.607426	0.543568	0.858447
ENSSSCG00000049191	0.504542	0.877394	2.87752	0.304913	0.760432	NA
ENSSSCG00000057298	0.179445	0.982367	4.08047	0.240748	0.80975	NA
ENSSSCG00000058964	0.673503	-1.46193	2.23259	-0.654814	0.512587	NA
ENSSSCG00000053631	0.155422	0.982367	4.08047	0.240748	0.80975	NA
ENSSSCG00000047702	0.465863	-0.815986	2.92282	-0.279177	0.780109	NA
RPS12	19486.8	0.11709	0.262218	0.446535	0.655211	0.901156
ENSSSCG00000043047	1.52685	0.334231	1.61265	0.207255	0.83581	NA
ENSSSCG00000051799	19.9896	0.299086	0.501943	0.595856	0.551271	0.860941
ENSSSCG00000058641	0.35889	1.97278	4.02973	0.489557	0.624447	NA
SLC18B1	105.341	-0.104686	0.33078	-0.316482	0.751637	0.93271
ENSSSCG00000059950	0.675534	0.1566	3.71411	0.0421634	0.966368	NA
ENSSSCG00000054311	1.26949	-0.679186	1.92596	-0.352648	0.724352	NA
ENSSSCG00000061287	17.2427	-0.580197	1.11292	-0.521328	0.602138	0.881243
ENSSSCG00000045607	0.155422	0.982367	4.08047	0.240748	0.80975	NA
ENSSSCG00000055774	0.684856	-1.52029	2.72243	-0.558431	0.57655	NA
ENSSSCG00000054387	0.310844	1.79244	4.04581	0.443037	0.657739	NA
ENSSSCG00000041449	836.717	0.337066	0.381584	0.883333	0.377056	0.782563
ENSSSCG00000062879	0.165503	0.982367	4.08047	0.240748	0.80975	NA
ENSSSCG00000043626	0.793968	1.87311	2.56886	0.729158	0.465905	NA
ENSSSCG00000060784	2.24562	-0.825391	1.4724	-0.560575	0.575088	NA
ENSSSCG00000047804	0.323824	0.020594	4.08047	0.00504697	0.995973	NA
ENSSSCG00000004179	30.6273	-0.156452	0.817999	-0.191261	0.848321	0.961059
ENSSSCG00000062611	8.95608	0.0115483	0.750428	0.015389	0.987722	0.997271
ENSSSCG00000055985	1.45266	1.83995	1.64853	1.11612	0.264371	NA
ENSSSCG00000062181	0.152119	-0.941187	4.08047	-0.230656	0.817582	NA
TNFSF15	140.86	0.588162	0.297182	1.97913	0.0478012	0.473675
ENSSSCG00000049638	1.76813	-0.851503	1.78283	-0.477614	0.632925	NA
ENSSSCG00000004180	4.03278	-0.0472001	2.004	-0.0235529	0.981209	NA
ENSSSCG00000051325	9.54887	0.735523	0.669465	1.09867	0.271911	0.723974
ECT2L	2.73761	-0.784878	1.47254	-0.533008	0.594028	NA
ENSSSCG00000044363	13.3461	0.271877	0.664883	0.40891	0.682606	0.911629
CCDC28A	315.254	-0.228725	0.435296	-0.525447	0.599273	0.879332
ssc-mir-32	0.310844	1.79244	4.04581	0.443037	0.657739	NA
NHSL1	975.913	0.797186	0.512254	1.55623	0.119653	0.607636
ssc-mir-378b	0.323824	0.020594	4.08047	0.00504697	0.995973	NA
ENSSSCG00000004150	1141.41	0.290812	0.452589	0.642552	0.520515	0.848971
SMIM28	0.496089	-0.831077	3.91482	-0.21229	0.831881	NA
VNN1	14.8113	-2.80101	0.957416	-2.9256	0.00343797	0.15694
ENSSSCG00000004151	1.8721	0.229483	1.80695	0.127	0.89894	NA
ENSSSCG00000054150	12.3028	-0.213927	0.739449	-0.289306	0.772347	0.938631
ARFGEF3	30.5245	-0.934056	0.759701	-1.2295	0.218883	0.69105
ENPP1	690.652	-1.2192	0.577905	-2.10969	0.0348847	0.422717
SGK1	1869.66	-0.423724	0.493482	-0.858641	0.390539	0.788808
CCDC68	100.599	0.0333336	0.696427	0.0478637	0.961825	0.990495
MBD2	656.412	0.223676	0.499215	0.448056	0.654113	0.900547
MYB	71.8375	-1.19982	1.03332	-1.16113	0.245591	0.705406
ENPP3	239.759	-1.8378	0.974886	-1.88514	0.059411	0.503386
POLI	140.055	-0.392525	0.354482	-1.10732	0.268156	0.721677
ATP6V1G1	121.747	-0.624242	0.602983	-1.03526	0.300549	0.741289
MED23	689.979	0.200963	0.289369	0.694487	0.487377	0.8356
RGS3	360.671	-1.08461	0.648988	-1.67124	0.094675	0.569552
CITED2	1647.16	-0.076331	0.320669	-0.238037	0.811852	0.948981
TXLNB	33.8259	-1.0639	0.933435	-1.13977	0.254382	0.712233
STARD6	12.6012	-0.935083	0.615941	-1.51814	0.12898	0.616897
C18orf54	83.2942	-0.184913	0.432757	-0.427291	0.669167	0.905793
HECA	2294.69	0.544792	0.44015	1.23774	0.215812	0.688431
ABRACL	212.74	0.114386	0.547438	0.208948	0.834489	0.956025
ENSSSCG00000060550	242.012	0.0764644	0.276844	0.276201	0.782394	0.941967
APBA1	165.435	-1.26947	0.683608	-1.85702	0.0633079	0.51159
ENSSSCG00000038606	1.84189	0.235444	1.49528	0.157458	0.874884	NA
ENSSSCG00000042812	4.76777	-0.626338	1.34338	-0.466241	0.641043	0.895313
ALDH8A1	12.5498	1.61521	1.08933	1.48275	0.13814	0.626693
PTAR1	102.65	0.397979	0.517801	0.768595	0.442134	0.81281
RAB27B	1572.51	0.943341	0.766661	1.23045	0.218527	0.69105
RNF111	535.151	-0.0252923	0.232528	-0.108771	0.913384	0.978764
NMBR	0.152119	-0.941187	4.08047	-0.230656	0.817582	NA
C9orf135	2.85555	-0.609611	1.21004	-0.503794	0.614406	NA
MAMDC2	385.852	-0.834822	0.415389	-2.00973	0.0444593	0.465304
UTRN	2689.91	-0.501325	0.428494	-1.16997	0.242013	0.704602
ENSSSCG00000005255	569.674	-0.47835	0.209391	-2.28448	0.0223432	0.362818
SLTM	1150.02	0.282881	0.316114	0.894869	0.370857	0.779118
KLF9	1367.19	-0.18987	0.412713	-0.460054	0.645478	0.897956
TRPM3	16.6472	-1.6197	0.901128	-1.79742	0.0722694	0.530769
ENSSSCG00000057517	3.82009	0.352815	0.994127	0.354899	0.722665	NA
STX11	233.062	-0.613194	0.412421	-1.48681	0.137064	0.626693
PLAGL1	329.05	0.452968	0.405205	1.11787	0.26362	0.717389
ZC2HC1B	0.158322	-0.941187	4.08047	-0.230656	0.817582	NA
ENSSSCG00000034769	0.783485	-0.535059	2.16955	-0.246622	0.8052	NA
MINDY2	175.815	0.113281	0.423663	0.267385	0.789173	0.942955
CEMIP2	417.754	-0.28121	0.343994	-0.817485	0.413651	0.796847
RORA	1379.13	1.19662	0.705759	1.6955	0.0899805	0.561628
RFX3	17.1096	-0.189417	0.532814	-0.355504	0.722212	0.926078
HDDC2	154.444	-0.0100989	0.470171	-0.0214793	0.982863	0.996453
TPD52L1	55.994	-1.42489	1.13114	-1.25969	0.207781	0.681517
ENSSSCG00000039823	0.494058	-2.42494	2.7847	-0.870811	0.383858	NA
PUM3	580.963	-0.00579086	0.250389	-0.0231274	0.981549	0.996157
SPATA6L	30.778	-0.0540851	0.436514	-0.123902	0.901393	0.976882
SLC1A1	104.364	1.40299	0.820627	1.70965	0.0873304	0.556298
ENSSSCG00000040918	463.848	0.104932	0.374266	0.280368	0.779195	0.941175
GLIS3	159.939	-1.47295	0.690701	-2.13255	0.0329617	0.413611
ENSSSCG00000039614	0.337767	0.020594	4.08047	0.00504697	0.995973	NA
ICE2	310.782	-0.0350158	0.246632	-0.141976	0.887099	0.974383
PHACTR2	427.622	-0.966546	0.663614	-1.45649	0.145258	0.633543
KIAA2026	584.56	-0.029479	0.311717	-0.0945696	0.924657	0.981369
ANXA2	32574.1	0.572986	0.540981	1.05916	0.289526	0.734687
ERMP1	635.621	0.433409	0.59189	0.732245	0.464019	0.825328
ARG1	8.75518	2.52654	1.27212	1.98609	0.0470232	0.47116
FUCA2	1586.75	-0.676274	0.495761	-1.36411	0.172533	0.660627
RIC1	513.764	0.0674898	0.293977	0.229575	0.818422	0.950256
PEX3	573.621	0.31044	0.435096	0.713497	0.475538	0.830621
AKAP7	430.115	-1.86047	0.555267	-3.35058	0.000806424	0.0692073
ADAT2	103.961	0.438875	0.358323	1.2248	0.22065	0.69105
PDCD1LG2	20.3229	-1.55793	0.768296	-2.02777	0.0425835	0.456814
AIG1	732.28	0.245487	0.29955	0.81952	0.41249	0.796555
CD274	164.608	0.11362	0.882506	0.128746	0.897558	0.976036
ENSSSCG00000044542	0.341939	-1.8879	4.03359	-0.468043	0.639754	NA
HIVEP2	707.763	-0.0646042	0.362336	-0.178299	0.858488	0.964654
PLGRKT	357.365	0.143607	0.427058	0.336271	0.736667	0.929666
EPB41L2	2059.79	-1.09092	0.782349	-1.39441	0.163192	0.64929
ADGRG6	473.791	-0.301493	0.2087	-1.44463	0.148563	0.635292
FOXB1	1.60911	-1.16815	1.43809	-0.812295	0.416622	NA
ENSSSCG00000005216	1.48045	-0.268323	1.60212	-0.16748	0.866992	NA
BNIP2	877.577	-0.281685	0.230134	-1.224	0.220952	0.69105
ENSSSCG00000004583	482.718	-0.411557	0.248979	-1.65298	0.0983352	0.576475
INSL6	0.323824	0.020594	4.08047	0.00504697	0.995973	NA
VTA1	950.728	-0.120994	0.279535	-0.43284	0.665131	0.904235
JAK2	597.357	-0.243515	0.286803	-0.849066	0.395845	0.790709
GCNT3	35.2388	0.787004	0.463526	1.69786	0.0895337	0.5607
FAM81A	67.9181	-0.182648	0.507771	-0.359705	0.719067	0.924914
MYO1E	1859.89	0.574563	0.281558	2.04065	0.0412854	0.451655
IFNGR1	1485.25	-0.392298	0.381018	-1.0296	0.303197	0.742706
IL22RA2	1.9634	1.57024	1.50913	1.0405	0.298108	NA
ENSSSCG00000052472	0.82145	-0.415066	2.65704	-0.156214	0.875864	NA
CCNB2	184.181	-0.0772814	0.924349	-0.0836063	0.933369	0.982837
RCL1	337.429	-0.00962182	0.264878	-0.0363255	0.971023	0.993599
IL20RA	2909.05	1.07065	0.950337	1.12661	0.25991	0.715153
SLC35D3	6.17519	0.814313	0.969109	0.840269	0.400757	0.793562
AK3	1530.03	0.430758	0.468872	0.91871	0.358247	0.771811
PEX7	364.129	0.158758	0.405317	0.391689	0.695288	0.915261
TCF4	161.888	-0.631594	0.696378	-0.906971	0.364422	0.774803
CDC37L1	618.017	-0.140752	0.251344	-0.559999	0.57548	0.870363
MAP3K5	679.094	0.379936	0.333467	1.13935	0.254557	0.712268
HEY2	106.973	-0.967068	0.678875	-1.42452	0.154297	0.638621
ENSSSCG00000052990	0.155422	0.982367	4.08047	0.240748	0.80975	NA
ENSSSCG00000044946	5.47531	0.249211	1.85467	0.134369	0.893111	0.97509
ENSSSCG00000046709	0.320924	1.83211	4.0421	0.453257	0.650364	NA
ENSSSCG00000046403	4.5704	2.99097	2.0717	1.44372	0.148817	0.635292
ENSSSCG00000057474	169.441	-0.242826	0.246067	-0.986826	0.323728	0.757924
STX7	293.563	0.0840091	0.290209	0.289478	0.772215	0.938631
PLPP6	70.4324	0.38014	0.401616	0.946527	0.34388	0.766402
MAP7	902.675	1.09652	0.738163	1.48547	0.137419	0.626693
ENSSSCG00000042982	2.08986	1.6128	2.03702	0.791744	0.42851	NA
ENSSSCG00000057706	0.341939	-1.8879	4.03359	-0.468043	0.639754	NA
ENSSSCG00000061106	0.809833	-0.51841	2.72735	-0.190078	0.849248	NA
ENSSSCG00000061367	0.165503	0.982367	4.08047	0.240748	0.80975	NA
ENSSSCG00000056124	22.2494	-0.414609	0.555967	-0.745745	0.455822	0.820629
ENSSSCG00000057368	0.690454	1.59853	3.70468	0.431489	0.666113	NA
ENSSSCG00000051776	0.344947	1.92255	4.03401	0.476585	0.633658	NA
ENSSSCG00000043234	2.00717	0.533094	1.54137	0.345857	0.729451	NA
ENSSSCG00000054958	0.827653	-0.430159	2.65744	-0.16187	0.871409	NA
ENSSSCG00000062438	0.183617	-0.941187	4.08047	-0.230656	0.817582	NA
ENSSSCG00000060676	2.1788	1.18021	1.51515	0.778935	0.436018	NA
ENSSSCG00000054547	0.152119	-0.941187	4.08047	-0.230656	0.817582	NA
ENSSSCG00000057292	1.85765	0.0124915	2.41542	0.00517156	0.995874	NA
MOXD1	530.93	1.08259	0.532087	2.0346	0.0418908	0.452644
ENSSSCG00000056901	0.645308	0.0718416	2.28641	0.0314211	0.974934	NA
ENSSSCG00000053418	8.29006	0.0389791	0.755265	0.0516098	0.95884	0.990164
ENSSSCG00000062478	0.493189	0.921406	2.90399	0.31729	0.751024	NA
ENSSSCG00000053718	100.847	-2.58616	0.782286	-3.3059	0.000946707	0.0766476
ENSSSCG00000056909	0.310441	-1.76761	4.04443	-0.437048	0.662077	NA
ENSSSCG00000060432	0.152119	-0.941187	4.08047	-0.230656	0.817582	NA
ENSSSCG00000061171	3.72411	0.321464	1.11554	0.288168	0.773218	NA
ENSSSCG00000041641	0.158322	-0.941187	4.08047	-0.230656	0.817582	NA
ENSSSCG00000058961	6.61495	-0.529916	0.810089	-0.654145	0.513019	0.847103
ENSSSCG00000061136	16.7692	0.161882	0.586767	0.275888	0.782634	0.941967
CCN2	3412.99	-1.66303	0.729557	-2.2795	0.0226371	0.364456
ENSSSCG00000058411	0.165503	0.982367	4.08047	0.240748	0.80975	NA
ENSSSCG00000062003	0.152119	-0.941187	4.08047	-0.230656	0.817582	NA
ENSSSCG00000061837	1.76732	-4.27014	1.90332	-2.24353	0.0248628	NA
TMEM200A	56.1569	-2.48414	0.767919	-3.2349	0.00121684	0.0875749
TMEM260	591.013	0.286936	0.21025	1.36473	0.172336	0.660627
TXNL1	1823.14	-0.015171	0.319542	-0.0474773	0.962133	0.990495
PTPRK	1238.72	0.0987332	0.414331	0.238295	0.811652	0.948981
ENSSSCG00000019937	9.83895	-2.41905	1.0635	-2.27461	0.0229292	0.36481
ssc-mir-204	0.152119	-0.941187	4.08047	-0.230656	0.817582	NA
ENSSSCG00000057314	85.4285	-0.116734	0.42354	-0.275616	0.782843	0.941967
ENSSSCG00000050857	0.45966	-0.781211	3.98501	-0.196038	0.844581	NA
ENSSSCG00000058562	94.6002	0.430323	0.315816	1.36258	0.173016	0.661097
HIF1A	2217.3	0.211592	0.225579	0.937998	0.348245	0.76837
WDR7	565.077	-0.00523341	0.200267	-0.0261322	0.979152	0.99592
SNAPC1	86.4938	-0.297292	0.316427	-0.939527	0.34746	0.76837
ST8SIA3	0.501239	-0.897548	2.89903	-0.309603	0.756863	NA
SYT16	0.983385	-0.976518	2.06723	-0.472379	0.636656	NA
ONECUT2	0.155422	0.982367	4.08047	0.240748	0.80975	NA
ENSSSCG00000041512	99.3179	-0.279421	0.319807	-0.873716	0.382273	0.783766
FECH	774.984	-0.0730341	0.178874	-0.4083	0.683054	0.911781
ENSSSCG00000037043	2.45657	-0.568307	1.22481	-0.463997	0.64265	NA
ISG20	41.8291	0.694302	0.525932	1.32014	0.186789	0.667094
ENSSSCG00000033063	0.339039	0.020594	4.08047	0.00504697	0.995973	NA
ENSSSCG00000047303	1.32084	0.112476	2.01668	0.055773	0.955523	NA
SAMD4A	1530.38	-2.45356	0.730942	-3.35671	0.00078876	0.0680315
THEMIS	3.82078	-1.8841	1.15686	-1.62863	0.103391	NA
NARS1	2020.84	-0.0929367	0.29306	-0.317125	0.751149	0.93271
ENSSSCG00000004212	0.950416	-3.37785	2.41416	-1.39918	0.161759	NA
GCH1	142.519	-0.216035	0.373602	-0.57825	0.563096	0.865494
AEN	560.092	0.304026	0.308473	0.985581	0.324339	0.75813
ENSSSCG00000004213	68.2835	1.67855	0.841301	1.99518	0.0460236	0.469598
MTFMT	232.022	-0.0456425	0.235482	-0.193826	0.846312	0.959936
OTX2	2.16654	-4.55791	2.69695	-1.69003	0.0910229	NA
SPG21	1533	0.0849284	0.278068	0.305423	0.760044	0.935166
ENSSSCG00000038602	6.18571	3.11149	1.3467	2.31046	0.0208629	0.353241
EXOC5	1299.1	0.0717338	0.415106	0.172808	0.862802	0.966212
ANKDD1A	9.49267	-0.438834	1.29246	-0.339535	0.734207	0.928615
KIAA0408	73.0144	-0.0593963	0.872458	-0.0680793	0.945723	0.986719
ENSSSCG00000037998	6.45421	1.7177	1.23357	1.39246	0.163782	0.650367
ECHDC1	1503.71	0.336738	0.519661	0.647995	0.516988	0.84874
ENSSSCG00000004547	705.367	-1.06604	0.651579	-1.63608	0.101823	0.578129
RNF146	1009.86	-0.147651	0.27494	-0.53703	0.591247	0.876984
BCLAF1	2626.35	-0.036029	0.250755	-0.143682	0.885751	0.973992
RSPO3	273.158	-1.11498	1.0104	-1.10351	0.269807	0.722234
ENSSSCG00000057184	75.0248	0.139168	0.678997	0.204962	0.837602	0.957967
TRMT11	153.485	0.0031531	0.361484	0.00872266	0.99304	0.998183
HINT3	350.669	-0.7661	0.333987	-2.2938	0.0218018	0.358741
PIF1	30.7152	0.882222	0.828723	1.06456	0.287077	0.733874
NCOA7	940.598	-0.804671	0.501831	-1.60347	0.108831	0.590232
MTFR2	33.6149	-0.0137838	0.930242	-0.0148174	0.988178	0.997271
RBPMS2	238.886	-1.16588	0.861748	-1.35293	0.176079	0.661332
PDE7B	223.047	-1.464	0.671835	-2.17911	0.0293233	0.397968
OAZ2	1916.17	0.0526904	0.322477	0.163392	0.870209	0.968819
ZNF609	1024.7	0.209742	0.258927	0.810044	0.417915	0.79873
SAMD3	6.40529	-1.27349	1.18008	-1.07915	0.280519	0.729852
TRIP4	437.636	-0.0928796	0.226452	-0.410151	0.681695	0.911319
AHI1	247.09	-0.6357	0.353131	-1.80018	0.0718322	0.529531
PCLAF	314.992	-0.591842	0.847815	-0.69808	0.485127	0.835262
L3MBTL3	419.787	0.134293	0.29404	0.456716	0.647875	0.898994
CSNK1G1	481.695	0.12973	0.303036	0.428101	0.668577	0.905764
TMEM244	0.818285	0.525876	2.17146	0.242176	0.808644	NA
ARHGAP18	664.163	0.224808	0.370913	0.606094	0.544452	0.858676
PPIB	1594.03	-0.0529224	0.37822	-0.139925	0.888719	0.974383
ENSSSCG00000043584	0.94939	2.18625	2.48879	0.878441	0.379704	NA
ENSSSCG00000004170	122.605	0.402158	0.435176	0.924128	0.35542	0.771189
ENSSSCG00000062397	692.813	-0.118167	0.271189	-0.435738	0.663027	0.903409
SNX22	82.3963	0.90747	0.651536	1.39282	0.163675	0.650304
ENSSSCG00000062051	0.80791	1.89989	2.12311	0.894863	0.37086	NA
ENSSSCG00000057824	0.307541	0.020594	4.08047	0.00504697	0.995973	NA
ENSSSCG00000004207	1714.64	-1.63177	0.754691	-2.16217	0.0306049	0.404929
ENSSSCG00000062411	3.34004	0.791923	1.61121	0.491509	0.623067	NA
ENSSSCG00000054762	570.747	-1.11589	0.74502	-1.4978	0.134186	0.624768
ENSSSCG00000052089	44.6518	0.321819	0.448853	0.716981	0.473386	0.830308
ENSSSCG00000043315	2.79045	-0.49534	1.04104	-0.475811	0.634209	NA
ENSSSCG00000042703	2046.96	0.0192883	0.243832	0.0791048	0.936949	0.984757
ENSSSCG00000060727	0.310844	1.79244	4.04581	0.443037	0.657739	NA
ENSSSCG00000056436	5.22205	-3.8648	1.30093	-2.9708	0.00297027	0.143207
ENSSSCG00000053034	0.316644	-1.79238	4.04212	-0.443424	0.657459	NA
ENSSSCG00000063525	0.8364	-0.709219	2.65418	-0.267208	0.789309	NA
ENSSSCG00000052043	0.675952	2.89783	3.5549	0.815166	0.414977	NA
ENSSSCG00000053390	7.6611	0.422265	0.892682	0.47303	0.636192	0.89366
ENSSSCG00000063202	0.323824	0.020594	4.08047	0.00504697	0.995973	NA
ENSSSCG00000033894	135.561	-1.33751	1.0139	-1.31918	0.18711	0.667544
ENSSSCG00000043068	0.152119	-0.941187	4.08047	-0.230656	0.817582	NA
ENSSSCG00000059813	0.179445	0.982367	4.08047	0.240748	0.80975	NA
ENSSSCG00000062947	0.335736	-1.86432	4.03565	-0.461962	0.644108	NA
ENSSSCG00000047685	0.671472	-2.86583	3.48772	-0.82169	0.411253	NA
ENSSSCG00000060593	0.158322	-0.941187	4.08047	-0.230656	0.817582	NA
AP5M1	393.865	0.149085	0.226336	0.658687	0.510097	0.845769
ENSSSCG00000049389	0.152119	-0.941187	4.08047	-0.230656	0.817582	NA
ENSSSCG00000062824	0.158322	-0.941187	4.08047	-0.230656	0.817582	NA
ENSSSCG00000055584	0.79299	0.588281	2.65183	0.221839	0.824439	NA
ENSSSCG00000059090	1.2895	1.60741	2.41441	0.665755	0.505567	NA
ENSSSCG00000055062	0.465863	-0.815986	2.92282	-0.279177	0.780109	NA
ENSSSCG00000059141	17.8692	0.82975	0.613846	1.35172	0.176464	0.661332
ENSSSCG00000059897	15.8327	-0.259268	0.782599	-0.33129	0.740425	0.931315
ENSSSCG00000063357	0.165503	0.982367	4.08047	0.240748	0.80975	NA
ENSSSCG00000052966	1.29133	0.715416	1.677	0.426604	0.669668	NA
ENSSSCG00000061365	1.79623	0.337058	1.5663	0.215194	0.829616	NA
ENSSSCG00000057690	0.179445	0.982367	4.08047	0.240748	0.80975	NA
ENSSSCG00000054580	0.158322	-0.941187	4.08047	-0.230656	0.817582	NA
ENSSSCG00000062099	0.183617	-0.941187	4.08047	-0.230656	0.817582	NA
ENSSSCG00000061558	1.0328	2.2618	2.47544	0.913695	0.360877	NA
ENSSSCG00000058113	3.04174	0.740436	1.39536	0.530641	0.595667	NA
ENSSSCG00000061985	1.29559	2.66367	2.52261	1.05592	0.291007	NA
NAA30	807.528	0.0976382	0.277744	0.351541	0.725183	0.926187
ENSSSCG00000056139	302.762	-1.20508	0.70799	-1.70212	0.0887338	0.55902
ENSSSCG00000061500	0.155422	0.982367	4.08047	0.240748	0.80975	NA
ENSSSCG00000050757	29.7501	1.4039	0.633393	2.21647	0.0266592	0.388171
CCDC198	0.179445	0.982367	4.08047	0.240748	0.80975	NA
ENSSSCG00000042942	0.158322	-0.941187	4.08047	-0.230656	0.817582	NA
ENSSSCG00000053009	0.155422	0.982367	4.08047	0.240748	0.80975	NA
ENSSSCG00000059697	0.337767	0.020594	4.08047	0.00504697	0.995973	NA
ENSSSCG00000062659	0.310844	1.79244	4.04581	0.443037	0.657739	NA
ENSSSCG00000062201	5.93996	-3.00642	1.83245	-1.64066	0.100869	0.577795
ENSSSCG00000057397	0.826894	-1.90055	2.57266	-0.73875	0.460059	NA
ENSSSCG00000048279	0.152119	-0.941187	4.08047	-0.230656	0.817582	NA
ENSSSCG00000060884	19.7603	0.490254	0.619289	0.791641	0.42857	0.805958
ENSSSCG00000061752	41.8884	0.879588	0.548897	1.60246	0.109053	0.590756
ENSSSCG00000052476	2.09989	0.275697	1.48109	0.186144	0.852332	NA
ENSSSCG00000056433	63.1312	-1.744	0.643246	-2.71125	0.0067031	0.213771
ENSSSCG00000047502	0.313744	0.020594	4.08047	0.00504697	0.995973	NA
ENSSSCG00000052935	1.45519	1.59948	3.342	0.478599	0.632224	NA
ENSSSCG00000052386	0.304238	-1.74252	4.0468	-0.430592	0.666765	NA
SLC35F4	1.42242	1.81858	2.09676	0.86733	0.385761	NA
CIAO2A	396.298	0.0446173	0.345245	0.129233	0.897173	0.976036
ENSSSCG00000062236	1.09963	-2.40685	2.56328	-0.938971	0.347745	NA
ENSSSCG00000053164	0.310441	-1.76761	4.04443	-0.437048	0.662077	NA
ENSSSCG00000043973	0.152119	-0.941187	4.08047	-0.230656	0.817582	NA
ENSSSCG00000062940	0.183617	-0.941187	4.08047	-0.230656	0.817582	NA
ENSSSCG00000054947	0.320924	1.83211	4.0421	0.453257	0.650364	NA
ENSSSCG00000058558	0.787921	-1.77573	3.59307	-0.494209	0.621159	NA
ENSSSCG00000058264	0.304238	-1.74252	4.0468	-0.430592	0.666765	NA
ENSSSCG00000060280	24.7377	-0.371498	0.877786	-0.423222	0.672134	0.9076
ENSSSCG00000053899	0.152119	-0.941187	4.08047	-0.230656	0.817582	NA
ENSSSCG00000056089	0.152119	-0.941187	4.08047	-0.230656	0.817582	NA
DAAM1	1650.26	-0.520604	0.466275	-1.11652	0.2642	0.717829
ENSSSCG00000059612	0.304238	-1.74252	4.0468	-0.430592	0.666765	NA
ENSSSCG00000052570	0.665764	-1.47777	2.72476	-0.542349	0.587578	NA
ENSSSCG00000060378	1.1211	2.45615	2.40894	1.01959	0.307921	NA
HBS1L	986.588	-0.0471443	0.315637	-0.149363	0.881268	0.972238
ENSSSCG00000059079	0.158322	-0.941187	4.08047	-0.230656	0.817582	NA
ENSSSCG00000059265	0.80791	1.89989	2.12311	0.894863	0.37086	NA
DAPK2	568.64	1.27818	0.8121	1.57392	0.115507	0.597376
ENSSSCG00000050451	11.0203	0.0512951	0.695403	0.0737631	0.941199	0.985706
ENSSSCG00000063217	0.487855	-2.40927	3.83301	-0.62856	0.529637	NA
ENSSSCG00000055354	339.885	-0.989019	0.47115	-2.09916	0.0358029	0.426159
ENSSSCG00000044767	9.17377	0.624575	0.670358	0.931705	0.351489	0.770641
L3HYPDH	110.033	0.307193	0.345695	0.888625	0.374205	0.780569
ENSSSCG00000058967	0.490289	2.43867	3.82361	0.637792	0.523609	NA
ENSSSCG00000058521	8.11962	-0.420086	0.68934	-0.609403	0.542258	0.858212
JKAMP	437.415	-0.2973	0.207817	-1.43059	0.152549	0.637041
ENSSSCG00000018450	5.45112	0.079832	0.844102	0.0945762	0.924651	0.981369
ENSSSCG00000018972	20.4653	0.139001	0.697925	0.199163	0.842135	0.95923
HERC1	1137.42	0.228961	0.302937	0.755804	0.449767	0.816823
ENSSSCG00000018352	1.51224	-1.04996	1.9028	-0.551797	0.581088	NA
FBXL22	36.1277	-1.5588	0.769706	-2.02518	0.0428485	0.458511
CCDC175	0.627488	-0.0196003	3.73892	-0.00524222	0.995817	NA
RTN1	118.383	-1.24187	0.824589	-1.50605	0.132055	0.621124
USP3	610.674	0.464449	0.436116	1.06497	0.286891	0.733874
ENSSSCG00000038358	0.780585	0.629203	2.65034	0.237404	0.812343	NA
WDHD1	204.905	-0.297247	0.373887	-0.795016	0.426604	0.804719
ALDH1A3	340.165	1.31171	0.701709	1.86931	0.06158	0.508154
SOCS4	517.174	-0.209761	0.254606	-0.823863	0.410018	0.796527
CHSY1	519.897	-0.326874	0.33954	-0.962698	0.335699	0.762363
PLA2G4D	496.856	1.73381	1.08456	1.59863	0.109904	0.591839
PLA2G4E	2233.76	1.54566	0.830792	1.86047	0.0628196	0.511183
MAPK1IP1L	1048.92	-0.540233	0.271677	-1.98851	0.0467554	0.470404
MEIS2	463.317	-1.55794	0.595924	-2.61432	0.00894053	0.241282
PLA2G4F	909.955	1.50048	0.890908	1.68422	0.0921391	0.565418
LGALS3	8763.61	0.431588	0.385186	1.12047	0.262515	0.716669
ENSSSCG00000053306	207.717	-0.00242146	0.379569	-0.00637951	0.99491	0.998821
CCDC9B	801.343	-0.413723	0.378106	-1.0942	0.273868	0.725299
DLGAP5	233.931	-0.0559492	0.968636	-0.0577608	0.953939	0.988912
PLCB2	286.113	-0.728469	0.619247	-1.17638	0.239444	0.703976
FBXO34	146.755	-0.422439	0.355428	-1.18854	0.234622	0.699849
ENSSSCG00000040895	84.8363	-0.0844285	0.28099	-0.300468	0.76382	0.935772
ENSSSCG00000059505	0.542507	1.00973	3.85791	0.26173	0.793529	NA
ATG14	140.932	0.473635	0.438369	1.08045	0.279943	0.729172
APH1B	712.213	-1.2064	0.644082	-1.87305	0.0610612	0.506785
PAK6	868.187	0.97059	0.72358	1.34137	0.1798	0.663291
BUB1B	302.449	0.0639171	1.04526	0.0611493	0.95124	0.988374
CA12	1683.69	1.36255	0.944947	1.44193	0.149321	0.635593
KTN1	2505.26	-0.0476531	0.282655	-0.168591	0.866118	0.967716
ENSSSCG00000043097	0.814113	1.89991	2.12056	0.895945	0.370282	NA
RAB8B	1189	-0.556651	0.284489	-1.95667	0.0503865	0.480907
TYRO3	1963.99	1.35393	0.692173	1.95606	0.0504583	0.480907
GABRG3	0.313744	0.020594	4.08047	0.00504697	0.995973	NA
CTXN2	0.183617	-0.941187	4.08047	-0.230656	0.817582	NA
RPS27L	817.622	-0.109496	0.224156	-0.48848	0.62521	0.890661
GABRA5	3.96665	-0.225605	0.937601	-0.240619	0.80985	NA
MYEF2	62.9154	-1.50688	0.681099	-2.21242	0.0269378	0.388171
LACTB	269.986	0.12991	0.27115	0.479107	0.631863	0.89289
GABRB3	1.59757	-3.00458	2.38064	-1.26209	0.206917	NA
TPM1	8883.44	-1.42774	0.643879	-2.2174	0.0265956	0.388171
SCG5	27.7628	-2.49588	1.11138	-2.24576	0.0247195	0.37714
LINS1	238.483	-0.0868429	0.221962	-0.391252	0.695611	0.915336
PELI2	30.1546	-0.405217	0.726299	-0.557921	0.576898	0.870363
ASB7	258.26	-0.0639403	0.229479	-0.278632	0.780527	0.941789
ARMH4	93.5451	-1.15609	0.772358	-1.49684	0.134436	0.624987
ENSSSCG00000004839	18.8013	0.788064	0.907635	0.868261	0.385252	0.785607
ENSSSCG00000049460	2.28691	-0.352688	1.92169	-0.183531	0.854382	NA
ACTR10	1511.61	-0.134726	0.253586	-0.531285	0.595221	0.878299
CERS3	1213.2	1.17611	0.812281	1.44791	0.147641	0.634915
SELENOS	683.518	-0.459916	0.235255	-1.95497	0.0505868	0.481304
ENSSSCG00000055131	38.3226	-0.292889	0.748867	-0.39111	0.695716	0.915349
PSMA3	1634.79	-0.0636196	0.311765	-0.204062	0.838305	0.957967
MKRN3	1.67277	0.0390909	1.83097	0.0213498	0.982967	NA
LRRK1	553.487	-0.51937	0.426267	-1.21841	0.223066	0.692251
ARID4A	559.439	-0.461643	0.252507	-1.82824	0.0675143	0.521157
IGF1R	726.317	0.14064	0.343908	0.408946	0.682579	0.911629
SLC24A5	26.9396	-1.12942	0.667547	-1.6919	0.0906651	0.562416
ENSSSCG00000041479	0.331005	1.87099	4.03857	0.46328	0.643163	NA
SEMA6D	371.299	0.359063	0.482329	0.744437	0.456612	0.820659
TOMM20L	2.94405	0.026463	1.02766	0.0257508	0.979456	NA
TLN2	832.1	-0.0773146	0.558532	-0.138424	0.889905	0.974383
CDIN1	179.753	-0.140706	0.228641	-0.615403	0.538288	0.85674
ENSSSCG00000027270	163.867	-0.163888	0.29281	-0.559707	0.575679	0.870363
EHD4	643.358	-0.0989552	0.466755	-0.212007	0.832102	0.955362
KIAA0586	227.995	0.168236	0.290235	0.579653	0.562148	0.865264
SPTBN5	16.8504	-0.0493074	0.500008	-0.0986133	0.921445	0.980544
ENSSSCG00000061849	0.45966	-0.781211	3.98501	-0.196038	0.844581	NA
ENSSSCG00000048762	0.304238	-1.74252	4.0468	-0.430592	0.666765	NA
ENSSSCG00000057228	1.97705	2.3699	1.49416	1.58611	0.112715	NA
ENSSSCG00000043519	12.1013	-0.447081	1.22299	-0.365565	0.71469	0.923059
ENSSSCG00000004572	23.4383	-0.126949	1.02234	-0.124176	0.901176	0.976882
ENSSSCG00000004573	16.8785	0.278653	0.781911	0.356375	0.72156	0.925853
ENSSSCG00000004830	322.403	-0.335267	0.747756	-0.448365	0.65389	0.900547
VPS13C	584.46	-0.09927	0.343934	-0.288631	0.772864	0.938631
DACT1	618.671	-1.18489	0.921095	-1.28639	0.198307	0.676725
ENSSSCG00000036551	0.514312	2.50079	3.79101	0.659665	0.509469	NA
ENSSSCG00000054906	4.22032	-0.397754	0.9311	-0.427187	0.669243	NA
PLA2G4B	1689.41	1.28115	0.617332	2.07531	0.037958	0.435012
ENSSSCG00000005103	263.217	-0.0865922	0.288078	-0.300586	0.763731	0.935772
UBE3A	1386.78	-0.251936	0.201601	-1.24968	0.211418	0.684676
MRPS11	377.231	0.0855316	0.279301	0.306234	0.759427	0.935131
ENSSSCG00000057430	103.347	0.560664	0.420016	1.33486	0.181921	0.664946
MRPL46	333.554	-0.140641	0.263026	-0.534702	0.592856	0.877226
MAPKBP1	740.955	0.654752	0.388208	1.6866	0.0916806	0.565212
NTRK3	200.839	-0.903161	0.807398	-1.11861	0.263308	0.717389
OTUD7A	72.6438	1.02377	0.476003	2.15076	0.0314948	0.4086
KLF13	2921.64	0.298153	0.362952	0.821466	0.411381	0.796555
ENSSSCG00000035223	199.851	-2.69983	0.792623	-3.4062	0.000658741	0.0607883
FAM163B	5.48002	1.40675	1.37508	1.02303	0.306293	0.744848
ENSSSCG00000005683	730.471	-0.018545	0.254887	-0.0727577	0.941999	0.9858
MGA	471.359	0.274588	0.38583	0.711681	0.476662	0.830971
TTC23	40.1725	-0.119171	0.411316	-0.28973	0.772022	0.938631
BRD3	1776.57	0.295391	0.201107	1.46882	0.141881	0.631128
ENSSSCG00000063327	3.1021	1.07529	1.21663	0.883828	0.376789	NA
ESR2	6.32962	0.106305	0.770262	0.138011	0.890232	0.974383
ENSSSCG00000056777	143.158	0.0671804	0.327245	0.205291	0.837345	0.957919
ENSSSCG00000056368	0.995297	-2.20724	2.01051	-1.09785	0.27227	NA
NTNG2	13.7672	-2.19112	0.853918	-2.56596	0.0102891	0.261633
RPAP1	487.304	0.294831	0.260006	1.13394	0.256821	0.712695
SETX	1175.23	-0.15097	0.236669	-0.637896	0.523541	0.851713
MEF2A	1802.75	-0.110339	0.268979	-0.410215	0.681648	0.911319
ENSSSCG00000005725	322.564	0.326254	0.307861	1.05974	0.289261	0.734527
BMF	721.276	0.0215146	0.450314	0.0477768	0.961894	0.990495
CFAP77	0.501239	-0.897548	2.89903	-0.309603	0.756863	NA
SRP14	519.667	0.0200487	0.215778	0.0929134	0.925972	0.981376
ENSSSCG00000055870	0.331564	0.020594	4.08047	0.00504697	0.995973	NA
SYNE2	3199.26	0.735648	0.379329	1.93934	0.0524598	0.485663
ENSSSCG00000059580	1.37531	0.0573203	1.96518	0.029168	0.976731	NA
ENSSSCG00000059979	1.80513	-1.38774	1.36778	-1.01459	0.310302	NA
TOR1A	469.369	-0.295423	0.287116	-1.02893	0.303511	0.742706
ENSSSCG00000055844	771.267	-1.21959	0.597765	-2.04025	0.041325	0.451785
LYSMD4	413.015	0.368607	0.350111	1.05283	0.292418	0.736379
MYMK	0.152119	-0.941187	4.08047	-0.230656	0.817582	NA
ENSSSCG00000059577	0.158322	-0.941187	4.08047	-0.230656	0.817582	NA
EIF2AK4	780.634	0.224094	0.304713	0.735427	0.462079	0.824014
ENSSSCG00000057874	197.7	-0.152062	0.221585	-0.686246	0.492558	0.837305
ENSSSCG00000051803	4.68619	-0.589232	0.942669	-0.625067	0.531927	0.855243
ENSSSCG00000058109	2.10745	-0.64775	1.28905	-0.502503	0.615314	NA
ENSSSCG00000051882	1.00837	0.0428096	1.8061	0.0237027	0.98109	NA
ADAMTS17	51.4697	-0.559758	0.408329	-1.37085	0.170422	0.659271
ENSSSCG00000059248	3.13205	1.49547	1.20965	1.23628	0.216355	NA
ENSSSCG00000059569	0.152119	-0.941187	4.08047	-0.230656	0.817582	NA
ENSSSCG00000055636	22.647	-0.774662	0.693003	-1.11783	0.263638	0.717389
ENSSSCG00000062745	1.45082	-2.83546	3.3245	-0.852899	0.393715	NA
DDX31	232.957	-0.0460183	0.381486	-0.120629	0.903985	0.977249
ENSSSCG00000056799	1.07805	0.441853	3.44925	0.128101	0.898069	NA
GREM1	1102.22	-2.01283	0.851662	-2.36341	0.0181075	0.333325
GTF3C4	503.685	0.0698165	0.195743	0.356675	0.721335	0.92583
FMN1	98.1253	1.08306	0.398583	2.71727	0.00658224	0.211965
ENSSSCG00000061963	1.62677	0.617035	1.56199	0.395031	0.69282	NA
ENSSSCG00000055290	197.645	-0.387065	0.422746	-0.915597	0.359878	0.772198
ENSSSCG00000044554	0.493189	0.921406	2.90399	0.31729	0.751024	NA
RAPGEF1	1511.29	0.133493	0.164319	0.812404	0.41656	0.798369
ENSSSCG00000027232	7.66576	-0.140143	0.722873	-0.193869	0.846278	0.959936
GPR176	171.2	-0.533092	0.406869	-1.31023	0.190119	0.670198
DPH6	312.601	0.144853	0.313877	0.461496	0.644442	0.897319
MED27	299.9	0.0574605	0.192463	0.298553	0.765281	0.936601
ENSSSCG00000004786	1.14237	0.502722	1.71444	0.293228	0.769348	NA
ENSSSCG00000057289	5.16309	2.13389	1.73331	1.23111	0.218283	0.69105
FSIP1	2.11221	0.405928	1.94354	0.20886	0.834558	NA
ENSSSCG00000059601	2.37969	3.64417	2.33653	1.55965	0.118842	NA
LRRC9	7.51548	-2.23899	1.07951	-2.07408	0.0380723	0.435012
AQR	370.618	0.143435	0.267046	0.537117	0.591187	0.876984
THBS1	3960.3	-1.46234	0.770269	-1.89847	0.0576336	0.499104
PRRX2	756.388	-0.777161	0.675274	-1.15088	0.249781	0.707663
PTGES	300.973	-0.380882	0.452931	-0.840929	0.400388	0.793427
ENSSSCG00000061897	2.8254	-0.962889	1.81112	-0.531653	0.594966	NA
DBH	13.4781	2.0792	1.12346	1.85071	0.0642109	0.514577
PCNX4	450.048	-0.089044	0.256894	-0.346618	0.728879	0.926839
RASGRP1	814.364	0.880562	0.6839	1.28756	0.197899	0.676725
SARDH	17.786	0.370441	1.25722	0.29465	0.768261	0.937638
DHRS7	1231.62	0.289681	0.253869	1.14107	0.253842	0.711972
ZNF770	223.032	-0.0995229	0.295644	-0.33663	0.736396	0.929511
FAM98B	374.367	0.0481107	0.345429	0.139278	0.889231	0.974383
PPM1A	953.521	-0.187491	0.22705	-0.825771	0.408934	0.796159
VAV2	1257.68	0.452896	0.340903	1.32852	0.184007	0.666063
ACTC1	29.4651	-5.90061	1.66098	-3.55248	0.000381616	0.0471228
SPRED1	1149.93	-0.115985	0.230999	-0.5021	0.615597	0.886983
TGM7	4.0634	3.55918	1.48791	2.39207	0.0167535	NA
C14orf39	7.5579	-5.36624	1.77887	-3.01666	0.00255578	0.131916
TGM5	721.957	1.56302	0.721519	2.16629	0.030289	0.403008
SCAI	20.9365	0.422311	0.617933	0.683426	0.494338	0.838421
SIX6	0.335736	-1.86432	4.03565	-0.461962	0.644108	NA
SIX1	358.452	-1.49236	1.10037	-1.35623	0.175025	0.661332
SIX4	52.4965	-1.52714	0.874088	-1.74713	0.080615	0.545789
MNAT1	243.634	-0.000608321	0.239747	-0.00253735	0.997975	0.999241
GJD2	0.304238	-1.74252	4.0468	-0.430592	0.666765	NA
PPP6C	1352.95	0.0488026	0.246454	0.19802	0.84303	0.959511
ENSSSCG00000004806	252.753	-0.133042	0.690372	-0.192711	0.847186	0.960252
TRMT5	230.971	-0.0457361	0.283477	-0.161339	0.871826	0.969269
NDN	382.166	-0.893577	0.620484	-1.44013	0.149831	0.635656
RABEPK	229.61	0.384189	0.384553	0.999053	0.317769	0.754105
SLC38A6	185.016	-0.287206	0.332335	-0.864207	0.387474	0.787226
ENSSSCG00000050569	1.95792	-0.410837	1.47368	-0.278783	0.780411	NA
ENSSSCG00000030003	7.17739	-1.51846	0.950851	-1.59695	0.110277	0.591975
HSPA5	4610.21	-0.257365	0.314127	-0.819303	0.412613	0.796555
ENSSSCG00000054331	16.7787	-0.214627	0.748458	-0.286759	0.774297	0.939424
ENSSSCG00000055023	12.1042	0.642436	0.717585	0.895275	0.37064	0.778852
EPB42	50.4772	-1.51781	0.759527	-1.99836	0.0456773	0.469074
ENSSSCG00000062007	0.519353	-2.49065	3.79045	-0.657085	0.511126	NA
ENSSSCG00000005095	949.624	0.316279	0.263179	1.20177	0.229454	0.696684
ENSSSCG00000055632	0.335736	-1.86432	4.03565	-0.461962	0.644108	NA
ENSSSCG00000062543	0.307541	0.020594	4.08047	0.00504697	0.995973	NA
ENSSSCG00000059867	0.344947	1.92255	4.03401	0.476585	0.633658	NA
ENSSSCG00000054502	0.367234	-1.97897	4.02596	-0.491552	0.623036	NA
ENSSSCG00000057613	0.317622	0.020594	4.08047	0.00504697	0.995973	NA
ENSSSCG00000056845	72.6955	0.685314	0.505586	1.35548	0.175264	0.661332
ENSSSCG00000059729	2818.22	-2.05226	0.864469	-2.37401	0.0175961	0.329369
ENSSSCG00000044231	12.4711	1.40735	0.774756	1.81651	0.0692917	0.524434
GAPVD1	1017.28	0.272694	0.264975	1.02913	0.303417	0.742706
ENSSSCG00000049674	0.165503	0.982367	4.08047	0.240748	0.80975	NA
GPR135	4.47678	-0.706517	1.01772	-0.694218	0.487546	NA
ENSSSCG00000060230	11.4213	-0.076578	0.614838	-0.12455	0.90088	0.976832
ENSSSCG00000052653	6.28089	-0.0237504	0.899277	-0.0264106	0.97893	0.995867
ENSSSCG00000051349	4.11728	1.39122	1.63645	0.850146	0.395244	NA
ENSSSCG00000061900	191.229	0.580377	0.446444	1.3	0.193601	0.672823
ENSSSCG00000058387	0.489886	-0.816458	2.89094	-0.28242	0.777621	NA
ENSSSCG00000053884	0.179445	0.982367	4.08047	0.240748	0.80975	NA
ENSSSCG00000060612	5.8399	-1.52533	0.83479	-1.8272	0.0676702	0.521157
ENSSSCG00000058001	0.640468	-1.41414	3.73522	-0.378597	0.704987	NA
ENSSSCG00000058801	5.40653	-1.35678	1.35232	-1.00329	0.315719	0.753169
ENSSSCG00000056778	85.9575	1.61573	0.550548	2.93477	0.00333797	0.154549
ENSSSCG00000056118	0.158322	-0.941187	4.08047	-0.230656	0.817582	NA
ENSSSCG00000056355	0.152119	-0.941187	4.08047	-0.230656	0.817582	NA
ENSSSCG00000046956	1.32514	1.70623	2.41532	0.706419	0.479928	NA
ENSSSCG00000042837	15.857	-0.149021	0.492041	-0.302863	0.761994	0.935365
CCNDBP1	695.402	0.217503	0.235354	0.924152	0.355407	0.771189
ENSSSCG00000051146	2.44378	0.621175	1.14267	0.543618	0.586704	NA
ENSSSCG00000056613	1.14945	-1.26068	1.72842	-0.729382	0.465768	NA
ENSSSCG00000061741	29.7345	0.780322	0.466199	1.6738	0.0941707	0.568442
ENSSSCG00000047955	0.155422	0.982367	4.08047	0.240748	0.80975	NA
ENSSSCG00000055676	1.75836	-2.12436	2.12201	-1.00111	0.316776	NA
ENSSSCG00000058025	0.155422	0.982367	4.08047	0.240748	0.80975	NA
TMEM62	307.172	-0.460483	0.56718	-0.811881	0.41686	0.798369
ENSSSCG00000054949	3.30701	0.457009	1.40588	0.32507	0.745128	NA
ENSSSCG00000051867	0.504542	0.877394	2.87752	0.304913	0.760432	NA
ENSSSCG00000060976	320.67	-0.636068	0.342395	-1.8577	0.0632113	0.51159
ENSSSCG00000053803	8.33115	0.0321193	0.659172	0.0487267	0.961137	0.990493
ENSSSCG00000048238	0.155422	0.982367	4.08047	0.240748	0.80975	NA
ENSSSCG00000057176	1.0298	-0.00893631	2.08107	-0.0042941	0.996574	NA
ENSSSCG00000057545	2.03645	-1.04508	2.35929	-0.442965	0.657791	NA
ENSSSCG00000051207	0.501239	-0.897548	2.89903	-0.309603	0.756863	NA
ENSSSCG00000060694	10.1351	-0.634583	1.25934	-0.5039	0.614332	0.886605
ENSSSCG00000053134	16.761	0.0487442	0.594604	0.0819776	0.934665	0.983534
ENSSSCG00000062562	0.972451	1.07166	2.68539	0.39907	0.689841	NA
ENSSSCG00000062715	2.69289	1.67985	1.77978	0.943854	0.345244	NA
ENSSSCG00000053298	0.658691	1.50238	2.23977	0.670778	0.502362	NA
ENSSSCG00000026014	2.81691	0.540528	1.06548	0.507308	0.611939	NA
ENSSSCG00000061720	0.152119	-0.941187	4.08047	-0.230656	0.817582	NA
ENSSSCG00000055525	10.1895	1.01113	0.805599	1.25513	0.209431	0.682821
ENSSSCG00000062037	0.883282	3.27905	3.37936	0.970317	0.331889	NA
ENSSSCG00000059991	1.64564	0.67561	1.51107	0.447106	0.654799	NA
ENSSSCG00000057496	54.6434	-1.47047	0.895494	-1.64208	0.100574	0.577795
ENSSSCG00000051017	0.947516	-2.15293	2.59738	-0.828886	0.407169	NA
LRRC28	1132.51	-0.178851	0.224602	-0.796302	0.425857	0.804115
UBR1	590.014	0.455919	0.361132	1.26247	0.206779	0.680756
TTBK2	44.1124	-0.215658	0.732531	-0.294402	0.768451	0.937638
ENSSSCG00000061305	40.5821	0.367852	0.400548	0.918373	0.358424	0.771811
NTMT1	371.948	0.0388157	0.319337	0.121551	0.903255	0.977188
CDAN1	478.293	0.129242	0.322552	0.400686	0.688652	0.913942
ENSSSCG00000022039	277.939	-0.386433	0.596905	-0.647394	0.517377	0.848949
ASB6	451.451	0.14463	0.176233	0.820675	0.411832	0.796555
ENSSSCG00000044105	61.2512	-0.153663	0.753524	-0.203926	0.838412	0.957981
ENSSSCG00000044127	10.8427	-0.391357	0.955154	-0.409732	0.682003	0.911319
ADAMTSL2	28.3043	-0.32766	0.64096	-0.511201	0.60921	0.88457
C9orf78	843.509	-0.153062	0.192565	-0.794856	0.426697	0.804728
HAUS2	285.48	-0.0351495	0.252932	-0.138968	0.889476	0.974383
MAPKAP1	1164.48	-0.128069	0.227868	-0.562031	0.574095	0.870026
LRRC57	572.173	-0.116397	0.208511	-0.558231	0.576687	0.870363
SNAP23	819.502	-0.258873	0.215113	-1.20343	0.228811	0.696684
PBX3	382.304	-1.20414	0.494256	-2.43627	0.0148396	0.306613
MVB12B	406.093	-0.479378	0.509046	-0.941719	0.346337	0.767431
LMX1B	15.0051	-0.126911	1.06929	-0.118687	0.905523	0.977628
ZBTB43	691.176	1.12855	0.474493	2.37843	0.0173864	0.328995
ZBTB34	326.778	0.34836	0.278433	1.25115	0.210881	0.683709
RALGPS1	130.666	-0.266002	0.447702	-0.594151	0.552411	0.860941
ZNF106	451.481	0.253199	0.358975	0.705338	0.4806	0.832218
CAPN3	78.1214	-0.641997	0.664903	-0.96555	0.334269	0.761644
ANGPTL2	5293.07	-0.90833	0.722331	-1.2575	0.208573	0.682067
ASS1	535.419	1.05551	0.500343	2.10958	0.034895	0.422717
FUBP3	796.975	0.0774631	0.292492	0.264839	0.791134	0.943121
ENSSSCG00000004729	113.184	0.60471	0.404437	1.49519	0.134865	0.626175
TMEM87A	1296.59	-0.212108	0.411415	-0.515557	0.606164	0.882858
ENSSSCG00000033472	1.68401	2.08755	1.68295	1.24041	0.214824	NA
VPS39	1261.08	0.310071	0.253259	1.22432	0.220831	0.69105
ENSSSCG00000004746	9.76399	-0.701435	1.41067	-0.497235	0.619023	0.888245
AK8	60.4237	0.0363192	0.433067	0.0838652	0.933164	0.982837
SPACA9	28.4101	0.141401	0.397017	0.356159	0.721722	0.925901
RTF1	1202.71	-0.0858304	0.222509	-0.385739	0.69969	0.916499
TSC1	1132.61	0.106849	0.221441	0.482516	0.629439	0.892469
DUT	661.835	0.112788	0.445705	0.253055	0.800226	0.945703
PRDM12	0.476346	2.40174	3.84398	0.624805	0.532099	NA
SLC12A1	23.4611	-0.957665	0.481258	-1.98992	0.0465994	0.470304
EXOSC2	328.74	0.249694	0.327957	0.761361	0.446442	0.813971
BAHD1	773.355	-0.0668082	0.163292	-0.409133	0.682442	0.911629
GFI1B	2.02595	-2.33068	1.5455	-1.50804	0.131544	NA
NDUFAF1	417.4	0.274098	0.264485	1.03635	0.30004	0.740778
ENSSSCG00000035544	699.897	0.00379137	0.596735	0.00635352	0.994931	0.998821
[truncated: 22,938 more rows]

## Sheet: MDV vs MEV
Analysis of differentially expressed genes in MDV vs. MEV
gene	baseMean	log2FoldChange	lfcSE	stat	pvalue	padj
ALDH1A1	679.608	-1.07107	0.639145	-1.67579	0.0937799	0.81292
ANXA1	13183.9	0.625519	0.451211	1.38631	0.165652	0.974412
RORB	1.92692	0.589067	1.7804	0.330863	0.740748	NA
TRPM6	19.9192	1.05879	0.703057	1.50597	0.132074	0.905861
C9orf40	207.147	0.446827	0.324828	1.37558	0.168952	0.976736
CARNMT1	640.727	0.112019	0.341027	0.328474	0.742553	0.999956
NMRK1	136.209	-0.296934	0.429775	-0.690905	0.489625	0.999956
OSTF1	1843.89	-0.148761	0.385874	-0.385517	0.699854	0.999956
PCSK5	78.9415	1.1943	0.539386	2.21419	0.026816	0.53845
ENSSSCG00000057774	20.1021	0.258342	0.640454	0.403373	0.686674	0.999956
RFK	491.905	-0.0723171	0.383053	-0.188791	0.850256	0.999956
GCNT1	77.0145	0.95091	0.520531	1.82681	0.0677286	0.730772
ENSSSCG00000039009	68.3541	2.86205	0.91628	3.12356	0.00178678	0.183541
ENSSSCG00000060679	2.25194	1.96642	2.36428	0.83172	0.405567	NA
VPS13A	695.714	-0.0348428	0.383415	-0.0908749	0.927592	0.999956
GRIK2	7.94161	1.64265	0.873222	1.88114	0.0599529	0.705714
FAXC	297.397	0.38897	0.357385	1.08838	0.276429	0.999956
LMBRD1	1008.15	-0.373029	0.414898	-0.899087	0.368606	0.999956
PNISR	1065.74	0.239718	0.332468	0.721025	0.470894	0.999956
COL19A1	24.6963	-0.0902548	0.74955	-0.120412	0.904157	0.999956
ENSSSCG00000004261	1.15521	-0.332262	1.99527	-0.166525	0.867744	NA
ENSSSCG00000050732	0.165936	1.02525	4.08047	0.251257	0.801615	NA
USP45	265.508	-0.000190086	0.448222	-0.00042409	0.999662	0.999956
KPNA5	128.975	-0.0662806	0.394357	-0.168072	0.866526	0.999956
ENSSSCG00000038757	261.465	-0.372085	0.341306	-1.09018	0.275635	0.999956
CCNC	1272.48	-0.0786776	0.406872	-0.193372	0.846668	0.999956
GNA14	89.7147	-0.362429	0.387664	-0.934906	0.349837	0.999956
ZUP1	186.869	-0.0487232	0.514883	-0.0946297	0.924609	0.999956
ABHD17B	550.049	0.0691849	0.421669	0.164074	0.869673	0.999956
C9orf85	119.913	0.364886	0.509097	0.716733	0.473539	0.999956
ENSSSCG00000004355	10.3385	0.268907	0.971619	0.276761	0.781963	0.999956
GDA	339.501	-0.490852	0.693754	-0.70753	0.479237	0.999956
RSPH4A	6.85747	0.863415	0.886474	0.973988	0.330063	0.999956
ENSSSCG00000032533	0.350573	1.95382	4.03501	0.484217	0.628232	NA
ENSSSCG00000031854	1.50922	0.422649	2.0983	0.201425	0.840367	NA
PTP4A1	2401.33	0.13508	0.355467	0.380007	0.70394	0.999956
ZFAND5	2414.11	0.309822	0.439856	0.704373	0.481201	0.999956
KLHL32	15.5359	0.569227	0.889183	0.640169	0.522063	0.999956
ENSSSCG00000004243	0.162502	1.02525	4.08047	0.251257	0.801615	NA
TMC1	5.19671	-0.469211	1.01894	-0.460487	0.645166	0.999956
ENSSSCG00000004246	108.192	-0.0706629	0.576937	-0.122479	0.902519	0.999956
ASF1A	441.242	-0.0680313	0.412685	-0.16485	0.869062	0.999956
CEP85L	260.022	1.20368	0.487059	2.47132	0.0134614	0.415768
TLE4	910.067	-0.41534	0.33251	-1.2491	0.211627	0.999956
TXNDC16	53.9431	0.209552	0.430207	0.487097	0.62619	0.999956
ENSSSCG00000044405	0.492501	0.914364	3.3344	0.274222	0.783914	NA
ENSSSCG00000062089	331.992	2.77792	0.911703	3.04695	0.00231175	0.198216
GPR137C	2.70134	1.31563	1.88273	0.698789	0.484684	NA
GJA1	23365	0.140829	0.502511	0.28025	0.779285	0.999956
ERO1A	1072.7	0.247679	0.244293	1.01386	0.310651	0.999956
TBC1D32	208.05	-0.00509899	0.491696	-0.0103702	0.991726	0.999956
ENSSSCG00000035799	0.343291	0.0634756	4.08047	0.015556	0.987589	NA
TLE1	661.644	0.175229	0.323809	0.54115	0.588404	0.999956
PSMC6	1938.39	0.00742371	0.330847	0.0224385	0.982098	0.999956
FAM184A	32.6392	0.140664	0.799803	0.175874	0.860393	0.999956
ENSSSCG00000033805	4.76838	-0.247095	1.33403	-0.185225	0.853053	0.999956
ENSSSCG00000037497	0.840375	0.650189	2.17413	0.299058	0.764896	NA
GNAQ	329.849	0.269918	0.332687	0.811327	0.417178	0.999956
MMS22L	88.3759	-0.125613	0.576652	-0.217832	0.82756	0.999956
CEP78	192.636	0.0181502	0.320866	0.0565663	0.954891	0.999956
COL9A1	3.59039	-0.340618	1.56649	-0.21744	0.827865	0.999956
STYX	647.029	0.196421	0.409541	0.479613	0.631503	0.999956
GNPNAT1	367.046	0.0851578	0.414284	0.205554	0.837139	0.999956
SLC35F1	38.1413	0.807493	0.78715	1.02584	0.304965	0.999956
PSAT1	5186.93	-0.394479	0.480109	-0.821644	0.41128	0.999956
FERMT2	678.098	1.13582	0.663638	1.71151	0.0869872	0.802002
NUS1	1485.39	-0.377302	0.549514	-0.686611	0.492328	0.999956
ENSSSCG00000058846	0.350573	1.95382	4.03501	0.484217	0.628232	NA
ENSSSCG00000004252	0.165936	1.02525	4.08047	0.251257	0.801615	NA
ENSSSCG00000043640	0.329999	0.0634756	4.08047	0.015556	0.987589	NA
ENSSSCG00000004253	890.421	-0.0161834	0.339764	-0.0476313	0.96201	0.999956
ENSSSCG00000044537	1.88978	0.278146	1.68057	0.165507	0.868545	NA
ENSSSCG00000041232	0.162502	1.02525	4.08047	0.251257	0.801615	NA
ENSSSCG00000060009	160.95	-0.486436	0.560486	-0.867883	0.385459	0.999956
ENSSSCG00000054181	3.48496	-0.333344	1.21025	-0.275435	0.782982	0.999956
ENSSSCG00000062298	3.64464	-1.04269	1.12255	-0.928861	0.352961	0.999956
ENSSSCG00000049009	0.149943	-0.898305	4.08047	-0.220147	0.825756	NA
ENSSSCG00000044318	0.184638	1.02525	4.08047	0.251257	0.801615	NA
ENSSSCG00000063502	0.514637	0.989442	3.30554	0.299329	0.764689	NA
ENSSSCG00000057281	0.165936	1.02525	4.08047	0.251257	0.801615	NA
ENSSSCG00000062448	0.164063	-0.898305	4.08047	-0.220147	0.825756	NA
HACE1	741.328	0.201087	0.388473	0.517636	0.604713	0.999956
DDHD1	336.944	0.0330699	0.283854	0.116503	0.907254	0.999956
ENSSSCG00000053831	0.177356	-0.898305	4.08047	-0.220147	0.825756	NA
ENSSSCG00000052615	0.328438	1.87251	4.04232	0.463226	0.643203	NA
DCBLD1	857.452	-0.15835	0.462427	-0.342431	0.732026	0.999956
ENSSSCG00000061420	0.328126	-1.7996	4.03749	-0.445723	0.655797	NA
ENSSSCG00000057344	0.184638	1.02525	4.08047	0.251257	0.801615	NA
ENSSSCG00000055999	0.516509	2.5168	3.99403	0.630141	0.528602	NA
ROS1	1.56532	0.506352	2.60583	0.194315	0.845929	NA
BMP4	195.397	0.900823	0.471071	1.91229	0.0558395	0.686039
CDKN3	118.925	0.231729	0.33487	0.691996	0.48894	0.999956
ENSSSCG00000019939	0.615766	-1.30566	3.94052	-0.331342	0.740386	NA
BVES	78.1729	0.935469	0.714827	1.30866	0.190648	0.999956
CNIH1	1456.89	0.461014	0.273459	1.68586	0.0918223	0.809355
VGLL2	94.3125	23.2921	3.90724	5.96126	NA	NA
POPDC3	91.2091	1.58853	0.930228	1.70768	0.0876953	0.802602
RFX6	5.66836	-3.94979	1.74771	-2.25998	0.0238223	0.516637
PREP	1800.47	-0.3426	0.394678	-0.868048	0.385368	0.999956
GMFB	1399.75	0.219307	0.387771	0.565557	0.571695	0.999956
ENSSSCG00000053030	1.1491	-0.234028	2.26554	-0.103299	0.917726	NA
MANEA	222.546	-0.314639	0.308169	-1.02099	0.307257	0.999956
FAM162B	39.2046	-1.1953	1.16184	-1.0288	0.303575	0.999956
PHF3	1354.2	-0.108571	0.317484	-0.341971	0.732373	0.999956
CGRRF1	248.597	-0.134884	0.277403	-0.486237	0.626799	0.999956
RPS29	4341.37	0.0959502	0.279273	0.343571	0.731169	0.999956
ENSSSCG00000042849	0.341419	-1.84928	4.03314	-0.458522	0.646578	NA
UFL1	888.485	-0.0991385	0.400641	-0.24745	0.80456	0.999956
LRR1	118.91	-0.16413	0.364663	-0.450086	0.652649	0.999956
MAN1A1	1126.35	0.770469	0.432046	1.7833	0.0745369	0.763492
FBXL4	311.486	-0.387742	0.353826	-1.09586	0.273141	0.999956
SIM1	64.5708	1.49114	0.97153	1.53483	0.124825	0.892043
RPL36AL	2074.31	0.0467275	0.318353	0.146779	0.883306	0.999956
FAM135A	2419.4	0.0881264	0.542596	0.162416	0.870978	0.999956
MGAT2	235.568	0.412511	0.368414	1.11969	0.262844	0.999956
ENSSSCG00000058931	268.203	-0.0244636	0.343397	-0.07124	0.943207	0.999956
DNAAF2	48.3395	0.190042	0.595516	0.319122	0.749634	0.999956
ASCC3	1081.77	0.0833869	0.388348	0.214722	0.829984	0.999956
ADGRB3	6.52705	2.22942	1.1391	1.95718	0.0503269	0.661103
KLHDC1	129.82	-0.00085683	0.424678	-0.0020176	0.99839	0.999956
LRFN5	26.8505	2.95956	0.930437	3.18083	0.00146854	0.166061
FHL5	144.393	1.93346	0.622949	3.10372	0.00191107	0.183541
ENSSSCG00000058693	2.60874	-0.266074	1.48643	-0.179003	0.857936	NA
KLHDC2	746.574	-0.0677612	0.271284	-0.24978	0.802758	0.999956
ENSSSCG00000043582	0.177356	-0.898305	4.08047	-0.220147	0.825756	NA
GPR63	26.9677	1.45049	0.964639	1.50366	0.132668	0.907778
NEMF	643.709	0.0236084	0.420602	0.05613	0.955238	0.999956
RAB11A	6718.79	-0.135995	0.359811	-0.377962	0.705459	0.999956
NDUFAF4	126.377	0.421608	0.359753	1.17194	0.241222	0.999956
ENSSSCG00000054004	2.96377	0.0673338	1.17839	0.0571406	0.954433	NA
ENSSSCG00000056940	1.69656	0.166749	2.07215	0.0804712	0.935862	NA
ENSSSCG00000056101	0.149943	-0.898305	4.08047	-0.220147	0.825756	NA
ENSSSCG00000060433	0.511203	0.977734	3.30983	0.295403	0.767686	NA
ENSSSCG00000062752	0.348701	0.0634756	4.08047	0.015556	0.987589	NA
ARF6	5620.55	0.130514	0.354767	0.367888	0.712957	0.999956
ENSSSCG00000043532	0.341419	-1.84928	4.03314	-0.458522	0.646578	NA
ENSSSCG00000045405	11.8496	-0.786626	0.820283	-0.958969	0.337575	0.999956
ENSSSCG00000063275	0.553913	2.6091	3.98868	0.654126	0.51303	NA
RTRAF	2033.35	0.184056	0.255903	0.719243	0.471991	0.999956
ENSSSCG00000061626	0.343291	0.0634756	4.08047	0.015556	0.987589	NA
ENSSSCG00000060707	2.89455	2.23051	1.66034	1.34341	0.179139	NA
ENSSSCG00000060554	0.943892	-2.09275	2.75517	-0.759573	0.44751	NA
NID2	563.302	1.69669	0.762286	2.2258	0.0260279	0.533543
ENSSSCG00000053196	0.312446	0.0634756	4.08047	0.015556	0.987589	NA
MEGF11	9.06116	0.466473	0.954476	0.488722	0.625039	0.999956
ENSSSCG00000059926	0.840063	-1.83518	2.42167	-0.757815	0.448562	NA
ENSSSCG00000059823	0.162502	1.02525	4.08047	0.251257	0.801615	NA
ENSSSCG00000057054	75.0921	-0.660747	0.801494	-0.824394	0.409716	0.999956
PTGER2	90.885	0.595861	0.662665	0.899189	0.368552	0.999956
FRMD6	2704.96	0.239373	0.292497	0.818378	0.413141	0.999956
ENSSSCG00000055234	0.149943	-0.898305	4.08047	-0.220147	0.825756	NA
ENSSSCG00000028092	563.34	0.18444	0.5276	0.349582	0.726652	0.999956
DIS3L	347.494	0.0875455	0.482201	0.181554	0.855933	0.999956
TIPIN	142.249	0.224425	0.463913	0.483765	0.628553	0.999956
ENSSSCG00000046948	0.149943	-0.898305	4.08047	-0.220147	0.825756	NA
MAP2K1	696.448	0.236578	0.266482	0.887783	0.374657	0.999956
VCPKMT	145.385	-0.370543	0.446251	-0.830347	0.406343	0.999956
SOS2	927.53	-0.0474768	0.321801	-0.147535	0.88271	0.999956
ENSSSCG00000050792	0.474948	0.897625	4.04353	0.22199	0.824322	NA
L2HGDH	540.392	0.195854	0.424809	0.46104	0.64477	0.999956
DMAC2L	149.767	-0.287544	0.36061	-0.797384	0.425228	0.999956
SNAPC5	97.8891	-0.199577	0.40677	-0.490638	0.623682	0.999956
RPL4	37177.3	0.0981234	0.310915	0.315596	0.752309	0.999956
CTDP1	1007.32	-0.0758236	0.253551	-0.299046	0.764905	0.999956
CDKL1	49.2189	0.61735	0.41059	1.50357	0.132692	0.907778
NETO1	0.149943	-0.898305	4.08047	-0.220147	0.825756	NA
MAP4K5	1353.48	-0.0317492	0.367305	-0.0864383	0.931118	0.999956
PCSK6	1686.42	-0.0937332	0.60273	-0.155514	0.876416	0.999956
ZWILCH	162.045	0.115449	0.341548	0.338018	0.73535	0.999956
ENSSSCG00000048049	1.14938	2.49507	2.61813	0.952997	0.340592	NA
ATL1	75.5771	-0.3815	0.448136	-0.851305	0.3946	0.999956
SNRPA1	608.861	-0.014398	0.320239	-0.0449603	0.964139	0.999956
ENSSSCG00000051767	0.505482	-2.41953	3.99233	-0.606045	0.544485	NA
LCTL	5.27252	0.242184	0.953243	0.254063	0.799447	0.999956
SMAD6	53.1037	1.70646	0.720334	2.36898	0.0178372	0.461032
TLE3	2579.14	-0.0308723	0.279829	-0.110326	0.912151	0.999956
SAV1	553.834	0.238468	0.261026	0.913577	0.360939	0.999956
MBP	1413.82	-0.493446	0.307777	-1.60326	0.108878	0.850678
ENSSSCG00000004963	1218.4	0.168424	0.271435	0.620494	0.534933	0.999956
NIN	579.105	0.0965556	0.453283	0.213014	0.831316	0.999956
SPESP1	0.681721	1.5893	3.05255	0.520644	0.602615	NA
NOX5	59.2314	-0.442208	0.662155	-0.667831	0.504242	0.999956
GLCE	908.934	-0.128579	0.380494	-0.337925	0.735419	0.999956
PAQR5	413.627	0.282269	0.603701	0.467564	0.640097	0.999956
PYGL	6735.64	0.0228462	0.38579	0.0592194	0.952777	0.999956
KIF23	367.678	0.131523	0.525024	0.250509	0.802194	0.999956
ENSSSCG00000004970	21996	0.0259703	0.352044	0.07377	0.941193	0.999956
ZNF236	525.041	-0.339963	0.360704	-0.942499	0.345937	0.999956
SMAD3	1397.2	0.344158	0.35212	0.977387	0.328377	0.999956
ABHD12B	890.093	-0.461196	0.485669	-0.94961	0.34231	0.999956
ZNF516	197.357	-0.501031	0.446631	-1.1218	0.261947	0.999956
TRIM9	4.07704	-0.733051	1.07163	-0.684054	0.493941	0.999956
NFATC1	1032.52	0.589029	0.349537	1.68517	0.0919559	0.809702
AAGAB	929.206	0.0139719	0.224012	0.0623713	0.950267	0.999956
TMX1	1698.72	-0.0210957	0.441836	-0.0477455	0.961919	0.999956
ENSSSCG00000057448	0.835792	0.567205	2.46444	0.230155	0.817971	NA
C15orf61	68.5745	-0.391369	0.549465	-0.712272	0.476296	0.999956
MDGA2	3.25911	1.36272	2.01925	0.674867	0.49976	NA
MAP2K5	379.233	0.0629445	0.306104	0.205631	0.837079	0.999956
C14orf28	171.865	-0.482425	0.339904	-1.4193	0.155812	0.954076
KLHL28	424.591	0.302745	0.338537	0.894272	0.371176	0.999956
TOGARAM1	573.949	0.0321007	0.333042	0.0963861	0.923214	0.999956
ATP9B	851.383	-0.388811	0.281362	-1.38189	0.167006	0.975483
SKOR1	5.38864	-0.300576	1.06677	-0.281762	0.778126	0.999956
PRPF39	918.35	-0.00717659	0.338107	-0.0212258	0.983066	0.999956
FKBP3	895.008	0.269492	0.308813	0.87267	0.382843	0.999956
PIAS1	476.34	-0.0612336	0.292386	-0.209427	0.834115	0.999956
ENSSSCG00000040521	0.659998	0.0228511	3.87413	0.00589838	0.995294	NA
FANCM	66.8611	0.103091	0.595456	0.173129	0.86255	0.999956
SALL3	7.72934	3.09742	1.24388	2.49013	0.0127697	0.408725
CALML4	122.895	0.792313	0.562375	1.40887	0.158874	0.961184
ENSSSCG00000060932	0.639745	-1.38396	3.09025	-0.447848	0.654263	NA
CLN6	480.227	-0.228034	0.38737	-0.588671	0.556082	0.999956
TSHZ1	547.448	-0.254056	0.34161	-0.743701	0.457058	0.999956
ZADH2	1041.88	-0.0624161	0.310171	-0.201231	0.840518	0.999956
ENSSSCG00000053589	48.2895	0.202711	0.448255	0.452222	0.651109	0.999956
MIS18BP1	345.917	0.0656283	0.388382	0.168979	0.865813	0.999956
ENSSSCG00000063467	200.244	0.228954	0.53266	0.429832	0.667318	0.999956
ENSSSCG00000051927	0.369276	2.01981	4.02936	0.501272	0.616179	NA
ENSSSCG00000055454	0.165936	1.02525	4.08047	0.251257	0.801615	NA
ENSSSCG00000063380	0.165936	1.02525	4.08047	0.251257	0.801615	NA
CNDP1	407.049	-0.790829	0.559296	-1.41397	0.15737	0.959175
FEM1B	1368.37	-0.0835643	0.405639	-0.206006	0.836786	0.999956
ENSSSCG00000051962	0.184638	1.02525	4.08047	0.251257	0.801615	NA
ENSSSCG00000060555	1.37985	1.67695	2.54057	0.66007	0.509209	NA
ITGA11	92.857	1.82886	0.816226	2.24063	0.0250502	0.528494
CORO2B	261.365	0.546128	0.801252	0.681593	0.495497	0.999956
ENSSSCG00000043563	412.187	0.356976	0.314794	1.134	0.256796	0.999956
ENSSSCG00000062712	0.669857	-0.0195563	2.62333	-0.00745474	0.994052	NA
ENSSSCG00000051922	0.673706	1.53767	3.05211	0.503806	0.614398	NA
ENSSSCG00000063237	14.1628	-0.592676	0.605917	-0.978148	0.328001	0.999956
ENSSSCG00000063081	26.0027	0.338176	0.652967	0.517906	0.604524	0.999956
ENSSSCG00000056226	6.32304	0.0414891	0.870314	0.0476714	0.961978	0.999956
ENSSSCG00000049234	7.17345	-0.409721	1.13184	-0.361995	0.717355	0.999956
ENSSSCG00000062074	1.86581	-0.694104	1.71781	-0.404063	0.686167	NA
ENSSSCG00000019885	1.35488	0.658886	2.57834	0.255546	0.798301	NA
CNDP2	3907.7	-0.362796	0.283821	-1.27825	0.20116	0.999956
ENSSSCG00000057267	1.85622	0.808276	1.68724	0.479051	0.631902	NA
ENSSSCG00000059807	0.852934	1.94652	2.41015	0.807635	0.419301	NA
DIPK1C	16.7365	1.13021	1.47699	0.765211	0.444146	0.999956
UACA	1071.04	0.942027	0.382841	2.46062	0.0138696	0.418229
MPHOSPH10	608.61	0.114092	0.443396	0.257315	0.796936	0.999956
MCEE	236.108	-0.249219	0.323975	-0.769255	0.441742	0.999956
APBA2	2.18093	-0.62574	1.54112	-0.406029	0.684721	NA
FAM189A1	1.46413	-0.90958	2.1105	-0.430978	0.666484	NA
TJP1	2825.59	0.0234194	0.268152	0.0873365	0.930404	0.999956
LARP6	255.865	1.48334	0.477918	3.10376	0.0019108	0.183541
LRRC49	10.3435	0.276572	0.934861	0.295843	0.76735	0.999956
GALR1	18.7312	-0.713319	0.635865	-1.12181	0.261944	0.999956
THSD4	83.8321	0.437249	0.742271	0.589069	0.555815	0.999956
CYB5A	2864.57	-0.147659	0.370725	-0.398298	0.69041	0.999956
ENSSSCG00000037781	145.162	0.532271	0.340326	1.564	0.117817	0.879301
TARS3	10.6515	-0.826633	1.13231	-0.730038	0.465367	0.999956
MYO9A	519.234	0.0668917	0.413942	0.161597	0.871623	0.999956
CBLN2	4.95906	0.948804	1.12938	0.840107	0.400848	0.999956
TRPM1	7.56667	-0.894055	1.02537	-0.871934	0.383244	0.999956
SENP8	161.157	0.113461	0.434065	0.261391	0.793791	0.999956
ENSSSCG00000026486	2.5018	-0.929969	1.3046	-0.71284	0.475945	NA
ENSSSCG00000024102	0.184638	1.02525	4.08047	0.251257	0.801615	NA
ENSSSCG00000026167	92.1682	0.375825	0.396555	0.947726	0.343269	0.999956
GEMIN2	195.204	0.412656	0.375678	1.09843	0.272017	0.999956
MTMR10	826.149	-0.109957	0.333578	-0.329629	0.74168	0.999956
TRAPPC6B	495.739	0.00666764	0.369289	0.0180554	0.985595	0.999956
FAN1	666.574	0.0918273	0.315684	0.290884	0.77114	0.999956
PNN	1587.27	0.0624794	0.31908	0.195811	0.844758	0.999956
TIMM21	301.848	-0.0277547	0.299189	-0.0927667	0.926089	0.999956
FBXO15	10.5287	-0.433822	0.819493	-0.529379	0.596542	0.999956
ENSSSCG00000004983	1148.96	-0.582142	0.483759	-1.20337	0.228833	0.999956
SOCS6	718.853	-0.0533401	0.318174	-0.167644	0.866863	0.999956
RTTN	189.779	-0.412494	0.369717	-1.1157	0.264549	0.999956
CD226	14.9613	-2.13528	0.756338	-2.82318	0.00475497	0.278821
DOK6	2.42086	0.956583	1.45422	0.657798	0.510668	NA
TM2D3	182.215	0.173132	0.315698	0.548409	0.583411	0.999956
ENSSSCG00000040252	337.043	-0.316314	0.323312	-0.978357	0.327898	0.999956
ENSSSCG00000052817	0.326566	0.0634756	4.08047	0.015556	0.987589	NA
ENSSSCG00000041473	0.164063	-0.898305	4.08047	-0.220147	0.825756	NA
ENSSSCG00000038208	2.38595	0.126889	1.77987	0.0712914	0.943166	NA
ENSSSCG00000063266	0.339858	0.0634756	4.08047	0.015556	0.987589	NA
ENSSSCG00000062837	0.478381	0.91418	3.36171	0.271939	0.785669	NA
ENSSSCG00000041275	1.47567	-0.186092	1.80554	-0.103068	0.917909	NA
ENSSSCG00000060706	48.0206	0.240998	0.904128	0.266553	0.789813	0.999956
ENSSSCG00000054784	2.47999	1.05576	1.51888	0.695093	0.486997	NA
ENSSSCG00000034069	6.06399	-0.133098	1.02191	-0.130244	0.896374	0.999956
ENSSSCG00000060600	337.812	-0.205911	0.43743	-0.470729	0.637835	0.999956
ENSSSCG00000060688	6.48749	-0.117469	1.03669	-0.113312	0.909783	0.999956
ENSSSCG00000054425	0.95614	-3.34557	3.31855	-1.00814	0.313385	NA
ENSSSCG00000051884	0.516509	2.5168	3.99403	0.630141	0.528602	NA
ENSSSCG00000051812	0.34714	1.94125	4.03611	0.48097	0.630538	NA
ENSSSCG00000053820	0.498644	-0.786116	3.32278	-0.236584	0.81298	NA
ENSSSCG00000055252	0.826245	3.19943	3.52574	0.907448	0.36417	NA
ENSSSCG00000055622	1.62019	0.654522	2.09179	0.3129	0.754357	NA
ENSSSCG00000061734	3.73433	0.441719	1.22087	0.361806	0.717497	0.999956
ENSSSCG00000054884	0.326566	0.0634756	4.08047	0.015556	0.987589	NA
ENSSSCG00000053207	0.334581	0.0634756	4.08047	0.015556	0.987589	NA
ENSSSCG00000044321	0.149943	-0.898305	4.08047	-0.220147	0.825756	NA
ENSSSCG00000061619	6.41281	0.311358	0.930126	0.334749	0.737815	0.999956
ENSSSCG00000049605	0.671418	-1.45476	3.06368	-0.474841	0.6349	NA
ENSSSCG00000043468	0.164063	-0.898305	4.08047	-0.220147	0.825756	NA
ENSSSCG00000047328	0.690431	1.54556	2.56397	0.6028	0.546642	NA
FBXO33	483.59	-0.171852	0.425064	-0.404296	0.685995	0.999956
ENSSSCG00000055452	0.162502	1.02525	4.08047	0.251257	0.801615	NA
ENSSSCG00000050191	0.329999	0.0634756	4.08047	0.015556	0.987589	NA
ENSSSCG00000044382	1.51481	0.392853	1.76004	0.223207	0.823374	NA
ENSSSCG00000060848	0.511203	0.977734	3.30983	0.295403	0.767686	NA
ENSSSCG00000050768	0.628325	0.116181	3.14062	0.036993	0.970491	NA
ENSSSCG00000058598	1.31688	0.0714069	1.68458	0.0423886	0.966189	NA
ENSSSCG00000062021	0.348701	0.0634756	4.08047	0.015556	0.987589	NA
ENSSSCG00000060152	11.0154	-0.176028	0.804707	-0.218748	0.826846	0.999956
ENSSSCG00000053633	5.6197	-0.418709	1.0547	-0.396993	0.691373	0.999956
ENSSSCG00000062595	2.67148	0.0586964	1.31065	0.0447843	0.964279	NA
ENSSSCG00000053742	14.7063	-0.749935	0.619219	-1.2111	0.225858	0.999956
ENSSSCG00000059000	0.162502	1.02525	4.08047	0.251257	0.801615	NA
ENSSSCG00000060666	1.06585	1.16116	2.84134	0.408667	0.682784	NA
ENSSSCG00000059856	0.149943	-0.898305	4.08047	-0.220147	0.825756	NA
ENSSSCG00000057301	0.162502	1.02525	4.08047	0.251257	0.801615	NA
ENSSSCG00000055014	0.162502	1.02525	4.08047	0.251257	0.801615	NA
ENSSSCG00000060731	1.19605	-0.237031	2.71149	-0.0874173	0.93034	NA
ENSSSCG00000056642	385.602	1.06905	0.440214	2.42847	0.0151625	0.431479
ENSSSCG00000052850	0.865914	-0.568785	2.4599	-0.231223	0.817142	NA
ENSSSCG00000062224	17.2193	1.05374	0.64806	1.62599	0.103952	0.83923
ENSSSCG00000055457	1.83224	0.852294	1.60277	0.531763	0.59489	NA
ENSSSCG00000049454	3.2243	0.0768759	1.68014	0.0457556	0.963505	NA
ENSSSCG00000054354	9.82451	0.532927	1.07289	0.496723	0.619384	0.999956
ENSSSCG00000061353	0.328438	1.87251	4.04232	0.463226	0.643203	NA
ENSSSCG00000059984	0.329999	0.0634756	4.08047	0.015556	0.987589	NA
ENSSSCG00000050242	0.149943	-0.898305	4.08047	-0.220147	0.825756	NA
ENSSSCG00000063030	0.719849	2.99077	3.67758	0.813242	0.416079	NA
ENSSSCG00000058062	3.61907	4.28765	2.24608	1.90895	0.0562692	0.686983
SNORD18	14.5079	0.423046	0.788633	0.53643	0.591662	0.999956
ENSSSCG00000020140	0.312446	0.0634756	4.08047	0.015556	0.987589	NA
SNORD16	2.25588	-1.81571	1.652	-1.0991	0.271725	NA
ENSSSCG00000020093	0.162502	1.02525	4.08047	0.251257	0.801615	NA
ENSSSCG00000054231	1.19124	-1.35232	2.71292	-0.498473	0.618151	NA
ssc-mir-339-2	0.149943	-0.898305	4.08047	-0.220147	0.825756	NA
IQCH	1.86018	-1.32922	1.75685	-0.756593	0.449294	NA
RGS17	3.21883	1.9509	1.27471	1.53047	0.1259	NA
MTRF1L	173.428	0.0787279	0.278858	0.282322	0.777696	0.999956
FBXO5	97.4512	0.0607366	0.540842	0.1123	0.910586	0.999956
LRP11	118.327	1.44118	0.774463	1.86087	0.062762	0.714149
PCMT1	1203.81	0.154643	0.291019	0.531384	0.595152	0.999956
NUP43	205.163	0.175099	0.315983	0.55414	0.579483	0.999956
ENSSSCG00000033739	0.165936	1.02525	4.08047	0.251257	0.801615	NA
FIG4	485.094	-0.0612456	0.291092	-0.210399	0.833356	0.999956
ENSSSCG00000004071	750.676	0.0180495	0.390924	0.0461713	0.963174	0.999956
ENSSSCG00000046319	55.3265	0.131928	0.551481	0.239225	0.810931	0.999956
ULBP1	16.1965	1.78238	1.21055	1.47237	0.140921	0.924836
ENSSSCG00000004096	1.45157	-1.68665	2.17922	-0.77397	0.438949	NA
ENSSSCG00000041378	1.58236	1.93138	2.16564	0.891826	0.372486	NA
STXBP5	924.924	0.113301	0.458612	0.247053	0.804867	0.999956
ENSSSCG00000004404	9.09128	1.53691	1.21549	1.26443	0.206075	0.999956
CDC40	216.453	-0.162387	0.417712	-0.388754	0.697458	0.999956
METTL24	114.842	1.88816	0.793633	2.37914	0.0173531	0.454164
DDO	57.748	1.22652	1.09477	1.12035	0.262566	0.999956
SLC22A16	22.4123	4.07688	1.6608	2.45476	NA	NA
MARCKS	2191.8	-0.147969	0.293245	-0.504592	0.613845	0.999956
ARMC2	7.6149	0.495844	0.899868	0.551019	0.581621	0.999956
SESN1	544.619	0.742583	0.601158	1.23525	0.216736	0.999956
ENSSSCG00000043354	2.69658	-0.345523	1.53193	-0.225547	0.821554	NA
RAB32	25.328	-0.168269	0.719429	-0.233893	0.815068	0.999956
ENSSSCG00000052903	0.361993	0.0634756	4.08047	0.015556	0.987589	NA
CEP57L1	34.7073	0.730243	0.542471	1.34614	0.178257	0.989491
ENSSSCG00000052303	451.687	0.672755	0.420463	1.60003	0.109592	0.852426
ENSSSCG00000032525	1.53094	1.15925	1.86344	0.622101	0.533875	NA
ENSSSCG00000004415	23.8393	-0.212892	0.967057	-0.220144	0.825759	0.999956
ENSSSCG00000033578	24.5068	0.373087	0.789492	0.472566	0.636523	0.999956
GRM1	0.177356	-0.898305	4.08047	-0.220147	0.825756	NA
CD164	4914.25	0.128881	0.297346	0.433436	0.664698	0.999956
SHPRH	309.74	0.290121	0.455151	0.637417	0.523853	0.999956
PPIL6	7.17501	-0.0743879	1.05945	-0.0702134	0.944024	0.999956
FBXO30	602.722	0.266045	0.308439	0.86255	0.388385	0.999956
VIP	4.89739	0.0178717	1.26924	0.0140806	0.988766	0.999956
SMPD2	1165.05	-0.0904851	0.396164	-0.228403	0.819333	0.999956
MICAL1	679.061	0.0551866	0.349124	0.158071	0.874401	0.999956
MYCT1	230.682	1.58432	0.676117	2.34326	0.019116	0.478994
ENSSSCG00000004081	163.652	-0.0467325	0.554837	-0.0842274	0.932876	0.999956
ZBTB24	261.764	0.0470757	0.448717	0.104912	0.916446	0.999956
SCML4	23.9014	0.56159	0.850945	0.65996	0.509279	0.999956
ENSSSCG00000049158	70.3025	0.327618	0.712243	0.45998	0.64553	0.999956
SEC63	2337.83	0.0626572	0.305841	0.204868	0.837675	0.999956
ENSSSCG00000004082	1679.57	0.353326	0.247626	1.42686	0.153621	0.950679
OSTM1	713.908	-0.173474	0.311531	-0.556843	0.577635	0.999956
NR2E1	4.47755	-1.42128	1.08729	-1.30717	0.191154	0.999956
SNX3	1800.16	0.395554	0.277279	1.42656	0.153708	0.950679
AFG1L	92.9	0.00965307	0.440648	0.0219065	0.982523	0.999956
ENSSSCG00000004387	2490.41	-0.122874	0.371365	-0.330871	0.740742	0.999956
ESR1	670.737	-0.05842	0.581853	-0.100403	0.920024	0.999956
HDAC2	1361.81	0.108594	0.352206	0.308325	0.757835	0.999956
CCDC170	186.767	0.800651	0.3648	2.19477	0.0281802	0.548541
HS3ST5	6.29254	0.862003	0.971342	0.887435	0.374845	0.999956
FRK	27.2917	-1.61211	0.836091	-1.92815	0.0538359	0.67621
ARMT1	255.605	0.284326	0.33635	0.845328	0.397928	0.999956
CDK19	487.481	0.36622	0.375867	0.974336	0.32989	0.999956
RMND1	122.128	-0.260715	0.406812	-0.640874	0.521604	0.999956
AMD1	2741.61	0.13339	0.446881	0.298491	0.765328	0.999956
ZBTB2	292.024	-0.0864192	0.294401	-0.293543	0.769107	0.999956
AKAP12	568.848	1.38286	0.823156	1.67994	0.0929681	0.812198
GTF3C6	734.732	0.153642	0.38602	0.398016	0.690619	0.999956
MTHFD1L	133.523	1.37471	0.69718	1.97182	0.0486307	0.654553
RPF2	405.268	0.137113	0.360889	0.37993	0.703998	0.999956
SLC16A10	269.62	-1.29464	0.79997	-1.61836	0.105584	0.842516
MFSD4B	37.2142	0.2681	0.476328	0.562848	0.573539	0.999956
REV3L	556.801	0.19239	0.36416	0.528311	0.597284	0.999956
TRAF3IP2	1173.24	-0.245092	0.227516	-1.07726	0.281366	0.999956
FYN	690.099	0.723304	0.43801	1.65134	0.0986685	0.82286
PLEKHG1	984.088	-0.356297	0.407405	-0.874553	0.381817	0.999956
CCN6	66.4393	-0.536494	0.606415	-0.884697	0.37632	0.999956
IYD	13.3951	3.67154	1.15308	3.18412	0.00145196	0.165274
PPP1R14C	2277.23	-0.533438	0.610319	-0.874031	0.382101	0.999956
TUBE1	43.033	0.103181	0.623697	0.165434	0.868603	0.999956
ENSSSCG00000035574	2.84841	0.910142	1.29021	0.70542	0.480549	NA
FAM229B	1.31619	0.226937	2.65995	0.0853164	0.93201	NA
LAMA4	1297.09	1.49376	0.674589	2.21433	0.0268061	0.53845
TFB1M	259.466	-0.054106	0.264276	-0.204733	0.837781	0.999956
TIAM2	92.1264	1.28295	0.620145	2.06879	0.0385659	0.604258
SCAF8	991.434	-0.0940876	0.304823	-0.308663	0.757578	0.999956
ATG5	823.683	-0.0420712	0.288868	-0.145642	0.884204	0.999956
PTGS1	386.599	0.0789429	0.479723	0.164559	0.869291	0.999956
ENSSSCG00000031644	6.93002	-0.590575	0.930156	-0.63492	0.52548	0.999956
PPP2R5E	1230.56	0.118002	0.353786	0.333542	0.738725	0.999956
LATS1	1137.76	0.0362437	0.404725	0.0895514	0.928644	0.999956
PDCL	652.831	-0.105622	0.31351	-0.336901	0.736192	0.999956
KATNA1	653.217	-0.221497	0.377122	-0.587334	0.556979	0.999956
PRDM1	1249.52	-0.0233083	0.401346	-0.0580753	0.953689	0.999956
GPHB5	0.162502	1.02525	4.08047	0.251257	0.801615	NA
RC3H2	937.041	0.113275	0.357846	0.316546	0.751588	0.999956
RHOJ	330.159	1.67348	0.625031	2.67743	0.00741892	0.331459
GINM1	1276.84	-0.00307194	0.280181	-0.0109641	0.991252	0.999956
PPIL4	334.078	-0.133145	0.289756	-0.459508	0.64587	0.999956
CRYBG1	5573.09	-0.370055	0.476692	-0.776298	0.437573	0.999956
ZC3H12D	33.252	-0.293766	0.524438	-0.560153	0.575375	0.999956
TAB2	1433.24	-0.0944595	0.303902	-0.310822	0.755936	0.999956
SLC24A2	46.3911	-0.688064	0.660089	-1.04238	0.297235	0.999956
TTLL11	7.23026	0.683477	0.825492	0.827964	0.407691	0.999956
UST	468.862	0.308669	0.341686	0.903372	0.366329	0.999956
ACER2	57.6741	-0.54899	0.465938	-1.17825	0.238698	0.999956
NDUFA8	711.86	0.308239	0.311784	0.98863	0.322844	0.999956
RPS6	25742.9	0.138775	0.280749	0.494303	0.621092	0.999956
ENSSSCG00000041504	17.3001	0.245282	0.940287	0.260858	0.794202	0.999956
SASH1	3234.47	-0.0341336	0.2789	-0.122386	0.902593	0.999956
ENSSSCG00000005529	6.29752	0.821595	1.02473	0.801764	0.42269	0.999956
RTN4IP1	206.509	0.275365	0.290066	0.949318	0.342459	0.999956
LHX6	208.25	1.90021	0.710603	2.67408	0.00749355	0.331459
ENSSSCG00000054030	175.84	0.35252	0.621368	0.567329	0.570491	0.999956
SAMD5	51.9536	-0.603649	0.879395	-0.686437	0.492438	0.999956
DENND4C	721.241	-0.144669	0.507011	-0.285338	0.775385	0.999956
ENSSSCG00000060764	1.80668	-0.204088	1.52224	-0.134071	0.893346	NA
ENSSSCG00000063189	10.9272	-0.368618	0.696161	-0.5295	0.596458	0.999956
QRSL1	338.397	0.140826	0.305155	0.461489	0.644448	0.999956
ENSSSCG00000051971	0.149943	-0.898305	4.08047	-0.220147	0.825756	NA
ENSSSCG00000054849	0.149943	-0.898305	4.08047	-0.220147	0.825756	NA
ENSSSCG00000056379	2882.53	1.24766	0.617473	2.02059	0.0433218	0.626256
ENSSSCG00000055261	0.847345	-0.404528	2.90996	-0.139015	0.889438	NA
MTRES1	257.581	0.0414502	0.260374	0.159195	0.873515	0.999956
ENSSSCG00000054787	0.524496	0.977657	3.28639	0.297487	0.766095	NA
DMRTA1	0.34714	1.94125	4.03611	0.48097	0.630538	NA
ENSSSCG00000054439	0.481815	0.923752	4.04112	0.228588	0.819189	NA
ENSSSCG00000055819	0.177356	-0.898305	4.08047	-0.220147	0.825756	NA
ENSSSCG00000058871	4.83055	0.672682	1.12652	0.597132	0.550419	0.999956
CDKN2B	1310.08	-0.167723	0.713946	-0.234924	0.814268	0.999956
BEND3	178.706	0.104384	0.425618	0.245253	0.806261	0.999956
ENSSSCG00000052174	0.524496	0.977657	3.28639	0.297487	0.766095	NA
ENSSSCG00000052694	3.6395	0.706825	1.52809	0.462554	0.643684	0.999956
P14ARF	6.76928	-0.393606	0.896725	-0.438937	0.660707	0.999956
ENSSSCG00000043123	20.8912	-0.487693	0.636213	-0.766557	0.443345	0.999956
PDSS2	213.465	-0.0912376	0.389063	-0.234506	0.814592	0.999956
ENSSSCG00000049297	0.325005	1.8594	4.04353	0.459845	0.645628	NA
RBM18	762.526	0.337328	0.298417	1.13039	0.258312	0.999956
ENSSSCG00000054729	12.5451	0.855768	0.667597	1.28186	0.199891	0.999956
ENSSSCG00000060161	2.85795	0.863196	1.5431	0.559391	0.575895	NA
MRRF	217.67	0.0783418	0.323059	0.2425	0.808393	0.999956
ELAVL2	0.703412	-1.48613	3.03178	-0.490183	0.624005	NA
ENSSSCG00000059324	24.1382	0.030345	0.750503	0.0404329	0.967748	0.999956
ENSSSCG00000050987	49.5831	0.209846	0.646967	0.324354	0.74567	0.999956
ENSSSCG00000043730	1.00787	0.0697395	2.05224	0.0339822	0.972891	NA
ENSSSCG00000042025	3.42199	-0.937789	1.15798	-0.809846	0.418029	NA
SOBP	39.1256	0.963657	0.763878	1.26153	0.207117	0.999956
ENSSSCG00000042082	1.5125	-1.83106	2.09871	-0.872471	0.382952	NA
ENSSSCG00000054991	2.13293	-0.204998	1.68695	-0.12152	0.903279	NA
ENSSSCG00000062018	1.54423	1.1351	1.86367	0.609064	0.542482	NA
ENSSSCG00000053439	0.162502	1.02525	4.08047	0.251257	0.801615	NA
ENSSSCG00000054300	0.495934	0.923752	4.04112	0.228588	0.819189	NA
ENSSSCG00000059819	12.0692	-0.257331	0.754818	-0.340918	0.733165	0.999956
ENSSSCG00000053361	8.36849	-0.433845	0.937104	-0.462963	0.643391	0.999956
ENSSSCG00000048882	0.520647	-0.935944	4.02903	-0.2323	0.816305	NA
LHX2	37.0958	-0.724536	1.25148	-0.578943	0.562627	0.999956
ENSSSCG00000061000	0.329999	0.0634756	4.08047	0.015556	0.987589	NA
ENSSSCG00000057293	0.299887	-1.68717	4.0479	-0.416801	0.676824	NA
ENSSSCG00000059436	1.00374	0.273118	3.49237	0.0782042	0.937666	NA
ENSSSCG00000061336	0.162502	1.02525	4.08047	0.251257	0.801615	NA
NEK6	355.438	0.405546	0.721916	0.561763	0.574278	0.999956
ENSSSCG00000044325	1.6629	1.34515	2.07165	0.649312	0.516137	NA
PSMB7	1457.21	-0.132733	0.228109	-0.581885	0.560644	0.999956
ENSSSCG00000057391	0.177356	-0.898305	4.08047	-0.220147	0.825756	NA
ENSSSCG00000052578	1.83541	0.508353	2.53268	0.200717	0.84092	NA
ENSSSCG00000045922	0.685155	1.59731	3.05001	0.523707	0.600482	NA
ENSSSCG00000052875	0.149943	-0.898305	4.08047	-0.220147	0.825756	NA
ENSSSCG00000049906	6.22583	-0.726201	0.900737	-0.80623	0.42011	0.999956
ENSSSCG00000063171	0.177356	-0.898305	4.08047	-0.220147	0.825756	NA
ENSSSCG00000053064	11.2892	0.0729864	0.918427	0.0794689	0.93666	0.999956
ENSSSCG00000045749	0.315879	0.0634756	4.08047	0.015556	0.987589	NA
SGPP1	1088.06	-0.225894	0.400422	-0.56414	0.572659	0.999956
ENSSSCG00000049152	1.80212	1.4656	2.13741	0.685689	0.492909	NA
ENSSSCG00000058772	0.149943	-0.898305	4.08047	-0.220147	0.825756	NA
ENSSSCG00000052081	0.339858	0.0634756	4.08047	0.015556	0.987589	NA
WDR89	132.881	0.0144668	0.396936	0.0364462	0.970927	0.999956
ENSSSCG00000051913	3.82864	-0.323656	1.11828	-0.289422	0.772259	0.999956
ENSSSCG00000063343	0.599774	-2.67935	3.97836	-0.673481	0.500642	NA
ENSSSCG00000054646	30.0576	-0.190761	0.887298	-0.214991	0.829774	0.999956
ENSSSCG00000032084	0.164063	-0.898305	4.08047	-0.220147	0.825756	NA
ENSSSCG00000047924	0.184638	1.02525	4.08047	0.251257	0.801615	NA
ENSSSCG00000050853	2.61891	0.443654	1.31706	0.336853	0.736228	NA
ENSSSCG00000053219	5.80165	0.539518	1.22736	0.439578	0.660243	0.999956
ENSSSCG00000051118	3.10874	-0.0792872	1.56819	-0.0505596	0.959676	NA
ENSSSCG00000041974	0.315879	0.0634756	4.08047	0.015556	0.987589	NA
ENSSSCG00000057365	3.1213	0.875753	1.26668	0.691379	0.489328	NA
ENSSSCG00000048523	1.31762	-0.654781	1.89831	-0.344929	0.730148	NA
ENSSSCG00000053065	4.87899	0.160335	1.22615	0.130763	0.895962	0.999956
ENSSSCG00000062078	0.350573	1.95382	4.03501	0.484217	0.628232	NA
ENSSSCG00000055924	499.321	1.25965	0.739998	1.70224	0.0887113	0.8046
NR5A1	1.33514	-1.59945	2.14335	-0.746235	0.455525	NA
ENSSSCG00000055717	0.149943	-0.898305	4.08047	-0.220147	0.825756	NA
TEK	459.002	2.39909	0.77253	3.10549	0.00189963	0.183541
ENSSSCG00000057869	0.331871	1.88552	4.04112	0.466585	0.640797	NA
ENSSSCG00000059442	0.164063	-0.898305	4.08047	-0.220147	0.825756	NA
ENSSSCG00000054412	0.334581	0.0634756	4.08047	0.015556	0.987589	NA
ENSSSCG00000061390	0.328126	-1.7996	4.03749	-0.445723	0.655797	NA
ENSSSCG00000047964	3.61732	0.847361	1.54782	0.547454	0.584067	0.999956
NR6A1	109.195	0.182863	0.523198	0.349511	0.726706	0.999956
ENSSSCG00000055198	0.299887	-1.68717	4.0479	-0.416801	0.676824	NA
ENSSSCG00000060766	1.18109	1.43998	2.25301	0.639138	0.522733	NA
ENSSSCG00000026396	0.165936	1.02525	4.08047	0.251257	0.801615	NA
ENSSSCG00000044366	0.162502	1.02525	4.08047	0.251257	0.801615	NA
ENSSSCG00000034393	1.84638	4.35235	3.72939	1.16704	0.243194	NA
ENSSSCG00000061592	114.8	0.24835	0.613622	0.404728	0.685677	0.999956
OLFML2A	3040.31	-0.308156	0.294943	-1.0448	0.296116	0.999956
ENSSSCG00000050067	16.9465	0.431058	0.626482	0.688061	0.491414	0.999956
ENSSSCG00000042842	32.086	0.649257	0.81805	0.793663	0.427391	0.999956
WDR38	0.861777	1.98315	2.4128	0.821928	0.411118	NA
IFT74	59.9511	0.175212	0.389177	0.450212	0.652558	0.999956
RPL35	11396	0.100747	0.363668	0.277031	0.781756	0.999956
LRRC19	1.00444	0.0632427	1.86647	0.0338837	0.97297	NA
ARPC5L	1572.91	-0.00502935	0.314499	-0.0159916	0.987241	0.999956
PLAA	952.632	-0.172932	0.350378	-0.493558	0.621619	0.999956
GOLGA1	458.808	-0.265594	0.434697	-0.610986	0.541209	0.999956
PLIN2	2005.93	-0.713539	0.67043	-1.0643	0.287192	0.999956
SERPINB13	2369.07	0.479049	0.531586	0.901171	0.367497	0.999956
ZBTB6	232.438	-0.176012	0.348609	-0.504898	0.613631	0.999956
SERPINB12	3878.39	1.65175	1.01883	1.62121	0.104972	0.840448
ZBTB26	172.198	0.232166	0.346676	0.669693	0.503053	0.999956
SERPINB11	786.642	0.360108	0.952751	0.377967	0.705455	0.999956
RABGAP1	1692.97	-0.469219	0.352244	-1.33209	0.182832	0.995726
HAUS6	486.819	0.184672	0.42588	0.433625	0.664561	0.999956
SERPINB5	21816.8	0.201254	0.483855	0.415938	0.677456	0.999956
STRBP	456.585	-0.249556	0.429704	-0.580762	0.561401	0.999956
DSEL	142.613	0.302529	0.411598	0.73501	0.462333	0.999956
KDSR	2188.5	-0.207319	0.388569	-0.533544	0.593657	0.999956
ADAMTSL1	548.681	-1.34578	0.37315	-3.60654	0.000310305	0.0751201
PHLPP1	780.022	0.0167291	0.306302	0.0546163	0.956444	0.999956
HACD4	141.347	0.564521	0.326535	1.72882	0.0838413	0.795698
FOCAD	509.528	0.203565	0.368026	0.553128	0.580176	0.999956
ZCCHC2	615.378	0.130818	0.271008	0.48271	0.629302	0.999956
TNFRSF11A	238.579	0.840615	0.629443	1.33549	0.181716	0.993868
ATP8B1	525.992	-0.287173	0.349694	-0.821212	0.411526	0.999956
ENSSSCG00000050047	0.314007	-1.7442	4.04252	-0.431463	0.666132	NA
MLLT3	271.018	0.225195	0.290934	0.77404	0.438907	0.999956
ENSSSCG00000005135	394.8	0.60959	0.344389	1.77007	0.0767163	0.770511
SLC51B	9.83486	0.716657	0.987918	0.725422	0.468193	0.999956
CRB2	1.88835	0.901221	1.54138	0.584683	0.558761	NA
RASL12	270.105	0.639914	0.557977	1.14685	0.251445	0.999956
IFNE	8.60328	0.570378	0.946001	0.602935	0.546552	0.999956
UBAP1L	9.39471	0.182169	0.775968	0.234763	0.814393	0.999956
ENSSSCG00000047263	0.67329	-0.01826	3.10601	-0.00587893	0.995309	NA
PDCD7	409.373	-0.0917171	0.373807	-0.245359	0.806178	0.999956
ENSSSCG00000043817	121.634	0.0986087	0.423479	0.232854	0.815875	0.999956
CLPX	1576.78	0.0725695	0.375216	0.193407	0.84664	0.999956
IFN-ALPHA-8	37.7759	1.23277	0.639813	1.92676	0.0540092	0.676645
ENSSSCG00000038797	1.03302	3.51706	3.24891	1.08253	0.279015	NA
DENND1A	444.205	0.313886	0.428307	0.732853	0.463648	0.999956
CILP	196.015	1.98693	0.753482	2.637	0.00836431	0.345591
ENSSSCG00000031075	0.34714	1.94125	4.03611	0.48097	0.630538	NA
ENSSSCG00000051765	0.658437	1.5016	3.06406	0.490068	0.624086	NA
IFN-ALPHA-15	12.4091	0.514897	0.753559	0.683287	0.494425	0.999956
IFN-OMEGA-6	74.7906	0.280117	0.397976	0.703855	0.481523	0.999956
IFNA1	0.820939	1.91148	2.85445	0.669649	0.503082	NA
PARP16	655.431	-0.11333	0.286814	-0.395135	0.692743	0.999956
ENSSSCG00000054127	13.0889	0.839216	1.06198	0.790238	0.429389	0.999956
ENSSSCG00000052428	0.526057	-0.883226	3.28894	-0.268545	0.78828	NA
TUSC1	98.1074	-0.0311366	0.577102	-0.0539535	0.956972	0.999956
RRAGA	1874.39	-0.168408	0.248029	-0.678985	0.497147	0.999956
IGDCC4	221.898	1.77017	0.766709	2.30879	0.0209554	0.48542
ENSSSCG00000031529	3.03448	0.637486	1.42501	0.447356	0.654618	NA
ENSSSCG00000058490	1.0223	2.26896	2.32233	0.97702	0.328559	NA
ENSSSCG00000063314	0.162502	1.02525	4.08047	0.251257	0.801615	NA
ENSSSCG00000062062	0.516509	2.5168	3.99403	0.630141	0.528602	NA
ENSSSCG00000057273	0.348701	0.0634756	4.08047	0.015556	0.987589	NA
ENSSSCG00000056734	1.02012	-0.939937	2.38062	-0.394829	0.692969	NA
DPP8	1400.55	-0.22234	0.362858	-0.612746	0.540044	0.999956
ENSSSCG00000054285	0.65046	0.18926	3.12249	0.0606118	0.951668	NA
ENSSSCG00000057864	4.29859	0.913355	1.21037	0.754609	0.450484	0.999956
ENSSSCG00000060359	0.327299	-1.79528	4.03788	-0.444611	0.656601	NA
ENSSSCG00000059966	196.729	0.413067	0.79436	0.519999	0.603064	0.999956
ENSSSCG00000053403	7.89518	-1.06976	0.810689	-1.31956	0.186981	0.999956
PAPPA	24.9	-0.197992	0.891509	-0.222086	0.824247	0.999956
ENSSSCG00000063341	2.73941	0.807054	1.30498	0.618443	0.536283	NA
ENSSSCG00000059082	27.3178	0.273569	0.481343	0.568345	0.569801	0.999956
ENSSSCG00000057745	0.546631	1.05804	4.02936	0.262581	0.792873	NA
ENSSSCG00000033560	131.138	1.69494	0.634538	2.67114	0.00755945	0.331459
ENSSSCG00000052950	1.36344	1.78296	2.56027	0.696395	0.486181	NA
ENSSSCG00000060748	0.149943	-0.898305	4.08047	-0.220147	0.825756	NA
KLHL9	881.619	0.120573	0.262507	0.459314	0.646009	0.999956
ENSSSCG00000059717	1.34328	0.112189	2.15525	0.0520535	0.958486	NA
IFN-OMEGA-2	6.76192	1.18709	1.32527	0.89573	0.370397	0.999956
ASTN2	30.4454	0.321277	0.70178	0.457803	0.647094	0.999956
HACD3	2120.08	-0.418859	0.574197	-0.729469	0.465715	0.999956
IFN-DELTA-1	7.05093	0.203916	0.96252	0.211856	0.832219	0.999956
ENSSSCG00000063223	2.87105	-0.815883	1.43883	-0.567046	0.570683	NA
ENSSSCG00000057852	0.184638	1.02525	4.08047	0.251257	0.801615	NA
ENSSSCG00000060250	4.71907	-0.565386	1.14105	-0.495498	0.620249	0.999956
ENSSSCG00000058698	0.329999	0.0634756	4.08047	0.015556	0.987589	NA
ENSSSCG00000055846	4.24682	0.577499	1.37274	0.420691	0.673981	0.999956
TRIM32	217.106	0.243032	0.262256	0.926697	0.354084	0.999956
ENSSSCG00000045802	0.343291	0.0634756	4.08047	0.015556	0.987589	NA
INTS14	346.069	-0.243686	0.236771	-1.02921	0.303382	0.999956
TLR4	752.212	0.361952	0.325076	1.11344	0.265521	0.999956
ENSSSCG00000043340	0.841936	-0.501186	2.17539	-0.23039	0.817789	NA
ENSSSCG00000057059	3.32648	0.337458	1.14939	0.293597	0.769066	NA
ENSSSCG00000055315	0.327299	-1.79528	4.03788	-0.444611	0.656601	NA
BRINP1	10.1202	0.396665	1.47822	0.268339	0.788439	0.999956
ENSSSCG00000035890	0.841936	-0.501186	2.17539	-0.23039	0.817789	NA
ENSSSCG00000059105	0.87393	-0.468553	2.8984	-0.161659	0.871574	NA
ENSSSCG00000062238	0.328438	1.87251	4.04232	0.463226	0.643203	NA
ENSSSCG00000053028	1.3523	1.59917	1.96297	0.814668	0.415262	NA
ENSSSCG00000062358	1.86123	-0.734977	1.6262	-0.451961	0.651297	NA
ENSSSCG00000057062	52.7941	-0.484407	0.739355	-0.655175	0.512355	0.999956
ENSSSCG00000062309	0.184638	1.02525	4.08047	0.251257	0.801615	NA
ENSSSCG00000054719	13.7364	0.636556	0.782304	0.813694	0.41582	0.999956
ENSSSCG00000054559	3.3499	0.418667	1.23569	0.338811	0.734752	NA
ENSSSCG00000051482	9.68936	0.232579	0.934451	0.248894	0.803443	0.999956
ENSSSCG00000042822	4.33887	0.216575	1.23103	0.17593	0.860349	0.999956
ENSSSCG00000053878	0.84838	3.23458	3.50462	0.922946	0.356035	NA
CDK5RAP2	371.024	-0.0430456	0.403563	-0.106664	0.915056	0.999956
ENSSSCG00000055858	11.008	0.579684	0.681597	0.850479	0.395059	0.999956
ENSSSCG00000060537	7.31009	-0.959205	1.13839	-0.842598	0.399454	0.999956
CDH7	1.17382	-1.15537	2.64886	-0.436178	0.662707	NA
SLC24A1	29.0068	-0.956718	0.595776	-1.60584	0.10831	0.849673
ENSSSCG00000020562	0.666423	-0.0418516	3.11113	-0.0134522	0.989267	NA
MIR491	0.164063	-0.898305	4.08047	-0.220147	0.825756	NA
ENSSSCG00000053029	314.642	-0.0962655	0.378088	-0.254611	0.799023	0.999956
DENND4A	630.654	0.593528	0.373872	1.58752	0.112396	0.861468
RELCH	1426.18	-0.188356	0.402396	-0.468085	0.639724	0.999956
PIGN	478.484	-0.196588	0.435706	-0.451195	0.651849	0.999956
RNF152	30.776	-0.258519	0.545778	-0.473671	0.635735	0.999956
CDH20	1.68571	-0.561134	1.56585	-0.358358	0.720076	NA
ENSSSCG00000036234	0.369276	2.01981	4.02936	0.501272	0.616179	NA
CDH19	28.7643	0.366785	0.532995	0.688158	0.491353	0.999956
PMAIP1	378.398	0.482414	0.48194	1.00098	0.316834	0.999956
CCBE1	124.589	0.371577	0.511419	0.72656	0.467496	0.999956
LMAN1	1220.99	-0.018967	0.391697	-0.0484227	0.961379	0.999956
ENSSSCG00000034415	697.117	-0.273182	0.365558	-0.747302	0.454881	0.999956
LIPG	652.812	-0.478691	0.653009	-0.733055	0.463525	0.999956
RAX	0.343291	0.0634756	4.08047	0.015556	0.987589	NA
GRP	0.184638	1.02525	4.08047	0.251257	0.801615	NA
DYM	1069.47	0.0903483	0.281225	0.321267	0.748008	0.999956
SEC11C	1376.29	-0.0164398	0.351436	-0.046779	0.962689	0.999956
ENSSSCG00000004911	1.43595	1.74852	3.24646	0.538592	0.590168	NA
ZNF532	777.71	0.147057	0.271615	0.541415	0.588221	0.999956
CXXC1	876.347	-0.0692491	0.271596	-0.254971	0.798745	0.999956
MALT1	811.716	-0.241163	0.451952	-0.533604	0.593615	0.999956
SKA1	19.8185	0.0822568	0.610345	0.134771	0.892793	0.999956
ZBTB7C	1532.39	-0.325414	0.506649	-0.642287	0.520687	0.999956
CTIF	500.384	0.484122	0.475693	1.01772	0.308812	0.999956
ENSSSCG00000004489	248905	-0.0112322	0.2588	-0.0434012	0.965382	0.999956
MTO1	244.314	0.250586	0.400704	0.625364	0.531732	0.999956
ALPK2	31.9051	-0.156029	0.699066	-0.223196	0.823383	0.999956
CGAS	33.587	0.257285	0.54869	0.468908	0.639135	0.999956
RNF165	3.34618	0.519507	1.48162	0.350634	0.725863	NA
RPL17-C18orf32	18451.2	-0.0334285	0.288886	-0.115715	0.907878	0.999956
NEDD4L	512.727	-0.780624	0.377828	-2.06608	0.0388206	0.605521
ST8SIA5	13.1688	1.70933	1.03955	1.64429	0.100115	0.826477
PIAS2	684.703	0.135923	0.27171	0.500249	0.6169	0.999956
KATNAL2	3.38322	0.353102	1.48254	0.238174	0.811746	NA
HDHD2	249.895	0.0137602	0.38944	0.0353334	0.971814	0.999956
ENSSSCG00000060420	1103.81	-0.0413921	0.305461	-0.135507	0.892211	0.999956
C18orf25	580.787	0.102183	0.263225	0.388197	0.697871	0.999956
MAPK4	1.73202	-1.32833	1.82953	-0.72605	0.467808	NA
SMAD7	134.662	0.145096	0.363919	0.398702	0.690113	0.999956
SMAD2	833.594	0.0377952	0.281984	0.134033	0.893376	0.999956
CD109	3851.58	0.235011	0.493307	0.476399	0.63379	0.999956
SLC17A5	331.746	-0.00114002	0.278018	-0.00410053	0.996728	0.999956
SETBP1	113.809	0.214827	0.539327	0.398324	0.690392	0.999956
MEGF9	3238.72	-0.208208	0.527056	-0.395041	0.692813	0.999956
ENSSSCG00000045948	1.00787	0.0697395	2.05224	0.0339822	0.972891	NA
ENSSSCG00000004491	1.18638	-0.313338	2.21295	-0.141593	0.887402	NA
ENSSSCG00000005508	244.234	-0.190951	0.473432	-0.403333	0.686704	0.999956
SLC14A1	26.4581	-3.17231	1.37253	-2.31129	NA	NA
PSMD5	1061.44	-0.0066679	0.383475	-0.0173881	0.986127	0.999956
SIGLEC15	8.49624	-4.62074	2.05834	-2.24489	0.0247753	0.527427
EPG5	182.944	-0.0107355	0.509449	-0.0210727	0.983188	0.999956
ATP5F1A	8121.25	0.11009	0.235091	0.468285	0.639581	0.999956
ENSSSCG00000039972	335.52	0.11116	0.300738	0.369625	0.711662	0.999956
PHF19	354.756	0.700018	0.339114	2.06426	0.0389933	0.605521
HAUS1	113.422	0.124109	0.381976	0.324915	0.745246	0.999956
TRAF1	108.121	0.696816	0.581854	1.19758	0.231081	0.999956
MRO	0.982302	0.0215445	2.05544	0.0104817	0.991637	NA
C5	44.4637	0.549579	0.485816	1.13125	0.25795	0.999956
ME2	280.161	0.685868	0.429151	1.5982	0.109999	0.853588
ENSSSCG00000032297	188.196	0.0169719	0.488467	0.0347453	0.972283	0.999956
ELAC1	103.348	0.334136	0.349034	0.957318	0.338407	0.999956
SMAD4	1179.93	0.326974	0.288905	1.13177	0.257731	0.999956
MEX3C	1025.52	0.0824711	0.461084	0.178864	0.858045	0.999956
ACAA2	430.156	0.494711	0.489838	1.00995	0.31252	0.999956
ENSSSCG00000004511	2003.27	-0.339517	0.5608	-0.605415	0.544903	0.999956
ENSSSCG00000045942	0.967138	-0.967931	2.81082	-0.344358	0.730577	NA
ENSSSCG00000041158	0.615766	-1.30566	3.94052	-0.331342	0.740386	NA
ENSSSCG00000055973	71.8937	0.338331	0.494782	0.683798	0.494103	0.999956
MBD1	1034.92	-0.0995394	0.274502	-0.362618	0.71689	0.999956
ENSSSCG00000047971	1.39114	-0.694064	2.21886	-0.312802	0.754431	NA
ENSSSCG00000049462	1.49809	0.408345	1.80465	0.226274	0.820988	NA
ENSSSCG00000058081	0.165936	1.02525	4.08047	0.251257	0.801615	NA
ENSSSCG00000056498	16.4459	-0.258671	0.763008	-0.339015	0.734599	0.999956
ENSSSCG00000057366	14.823	2.38681	1.17236	2.0359	0.0417602	0.61984
ENSSSCG00000059607	0.184638	1.02525	4.08047	0.251257	0.801615	NA
ENSSSCG00000054029	2.76691	0.632679	1.58858	0.398267	0.690433	NA
ENSSSCG00000062205	2.20681	0.284485	1.37703	0.206593	0.836328	NA
ENSSSCG00000048066	0.162502	1.02525	4.08047	0.251257	0.801615	NA
ENSSSCG00000055410	0.361993	0.0634756	4.08047	0.015556	0.987589	NA
ENSSSCG00000059417	0.164063	-0.898305	4.08047	-0.220147	0.825756	NA
SNORD58	2.00016	1.07306	1.63351	0.656908	0.51124	NA
ENSSSCG00000020045	0.885785	3.29195	3.39901	0.968503	0.332793	NA
ENSSSCG00000060601	84.3403	-0.335455	0.64316	-0.521573	0.601968	0.999956
VPS4B	1688.66	-0.00204861	0.423321	-0.00483939	0.996139	0.999956
TMX3	1388.33	0.161082	0.437472	0.368211	0.712716	0.999956
SERPINB8	2027.17	0.333527	0.496488	0.671773	0.501728	0.999956
SERPINB10	5747.17	-0.66081	0.616887	-1.0712	0.284078	0.999956
SERPINB2	7814.31	-0.134975	0.576299	-0.234209	0.814822	0.999956
ENSSSCG00000034000	4.66892	1.21018	1.53457	0.788611	0.43034	0.999956
SERPINB7	2150.38	0.161664	0.716757	0.22555	0.821551	0.999956
KBTBD13	0.325005	1.8594	4.04353	0.459845	0.645628	NA
ENSSSCG00000050338	0.697714	2.94737	2.91648	1.01059	0.312211	NA
ENSSSCG00000063165	0.354711	-1.89772	4.02903	-0.471013	0.637632	NA
ENSSSCG00000061862	0.184638	1.02525	4.08047	0.251257	0.801615	NA
ENSSSCG00000062442	0.489801	-0.833026	3.34682	-0.248901	0.803438	NA
ENSSSCG00000063419	2.47084	3.71073	2.27594	1.63042	0.103014	NA
ENSSSCG00000039179	4.55972	-0.705036	1.19843	-0.5883	0.556331	0.999956
ENSSSCG00000041383	0.369276	2.01981	4.02936	0.501272	0.616179	NA
ENSSSCG00000061814	509.242	-0.556316	0.471408	-1.18012	0.237954	0.999956
ENSSSCG00000051885	0.162502	1.02525	4.08047	0.251257	0.801615	NA
ENSSSCG00000056731	0.162502	1.02525	4.08047	0.251257	0.801615	NA
ENSSSCG00000047145	0.149943	-0.898305	4.08047	-0.220147	0.825756	NA
ENSSSCG00000056416	1.61916	-1.11993	1.81553	-0.616864	0.537324	NA
ENSSSCG00000062600	0.177356	-0.898305	4.08047	-0.220147	0.825756	NA
ENSSSCG00000054621	10.3281	-0.840386	0.805151	-1.04376	0.296596	0.999956
ENSSSCG00000062911	0.164063	-0.898305	4.08047	-0.220147	0.825756	NA
ENSSSCG00000060408	0.328438	1.87251	4.04232	0.463226	0.643203	NA
ENSSSCG00000052729	0.177356	-0.898305	4.08047	-0.220147	0.825756	NA
ENSSSCG00000060395	0.164063	-0.898305	4.08047	-0.220147	0.825756	NA
ENSSSCG00000061578	0.177356	-0.898305	4.08047	-0.220147	0.825756	NA
ENSSSCG00000062696	268.41	0.581722	0.446698	1.30227	0.192824	0.999956
RAB14	475.658	-0.126445	0.476135	-0.265566	0.790573	0.999956
ENSSSCG00000034749	1731.11	0.0402623	0.244484	0.164683	0.869194	0.999956
GSN	54711.2	0.362447	0.575546	0.629745	0.528861	0.999956
STOM	3631.79	1.07282	0.571835	1.8761	0.0606418	0.707132
ENSSSCG00000038200	1.31126	-0.728438	2.68234	-0.271568	0.785954	NA
ENSSSCG00000005518	1682.7	0.118588	0.335835	0.353113	0.724004	0.999956
DAB2IP	1219.54	-0.225978	0.326503	-0.692116	0.488864	0.999956
OR1K1	0.315879	0.0634756	4.08047	0.015556	0.987589	NA
ENSSSCG00000058119	0.859077	0.689096	2.45852	0.280289	0.779256	NA
ENSSSCG00000048491	0.177356	-0.898305	4.08047	-0.220147	0.825756	NA
ENSSSCG00000062052	0.162502	1.02525	4.08047	0.251257	0.801615	NA
ENSSSCG00000062283	0.165936	1.02525	4.08047	0.251257	0.801615	NA
ENSSSCG00000052639	0.184638	1.02525	4.08047	0.251257	0.801615	NA
ENSSSCG00000046469	0.162502	1.02525	4.08047	0.251257	0.801615	NA
ENSSSCG00000056817	2.82912	0.619646	1.24829	0.496395	0.619615	NA
ENSSSCG00000059466	0.149943	-0.898305	4.08047	-0.220147	0.825756	NA
ENSSSCG00000061402	6.99869	1.23008	0.966435	1.27281	0.203087	0.999956
ENSSSCG00000045923	0.328438	1.87251	4.04232	0.463226	0.643203	NA
ENSSSCG00000053002	26.3753	-0.563874	0.584363	-0.964938	0.334576	0.999956
ENSSSCG00000056449	65.0506	-0.31351	0.55617	-0.563694	0.572962	0.999956
ENSSSCG00000047129	70.7999	-0.496656	0.452697	-1.0971	0.272596	0.999956
ENSSSCG00000063161	125.063	0.097428	0.35646	0.273321	0.784606	0.999956
ENSSSCG00000048111	9.94296	-3.7989	1.3696	-2.77372	0.00554191	0.294905
ENSSSCG00000018665	0.648588	-1.35084	3.07216	-0.439703	0.660152	NA
AP4E1	830.769	0.0410203	0.379764	0.108015	0.913984	0.999956
SPPL2A	1701.22	0.0107018	0.389888	0.0274483	0.978102	0.999956
TRPM7	1655.32	-0.0119151	0.38614	-0.030857	0.975384	0.999956
ENSSSCG00000034352	1.00829	1.11896	2.32865	0.48052	0.630858	NA
USP50	0.162502	1.02525	4.08047	0.251257	0.801615	NA
USP8	1329.28	0.0319718	0.443212	0.0721366	0.942493	0.999956
GABPB1	321.357	0.0354814	0.305257	0.116235	0.907467	0.999956
FBN1	2182.01	2.32604	0.793193	2.9325	0.00336242	0.22664
DTWD1	189.232	0.326577	0.473654	0.689484	0.490518	0.999956
FAM227B	10.3783	0.518059	0.903495	0.573394	0.566378	0.999956
ENSSSCG00000056997	164.877	1.60101	0.81937	1.95395	0.0507075	0.661103
COPS2	1614.67	0.352784	0.260857	1.3524	0.176247	0.987124
SECISBP2L	1523.74	-0.295875	0.470665	-0.628631	0.529591	0.999956
ENSSSCG00000056133	37.5658	-0.703225	0.706115	-0.995907	0.319295	0.999956
CEP152	72.2219	-0.0582118	0.410551	-0.141789	0.887246	0.999956
HDC	48.2613	0.49559	0.800017	0.619474	0.535604	0.999956
SLC27A2	2.72275	0.958052	1.97086	0.486108	0.626891	NA
ATP8B4	24.267	0.134482	0.607942	0.221208	0.82493	0.999956
ADAM10	1282.77	0.330907	0.21755	1.52106	0.128245	0.899337
LIPC	7.48693	1.85539	1.0966	1.69195	0.0906563	0.806176
ENSSSCG00000055556	1.32417	0.85731	1.84996	0.463421	0.643062	NA
ALDH1A2	159.834	0.151157	0.767979	0.196824	0.843965	0.999956
AQP9	45.8703	-0.507042	1.03529	-0.489759	0.624304	0.999956
POLR2M	804.917	0.132312	0.245283	0.539428	0.589591	0.999956
ENSSSCG00000004598	1064.53	-0.295594	0.413125	-0.715508	0.474295	0.999956
CGNL1	678.67	0.320778	0.480758	0.667234	0.504622	0.999956
TCF12	1007.66	0.131347	0.394093	0.333288	0.738917	0.999956
ANKS6	66.3412	1.30276	0.643985	2.02297	0.0430765	0.625685
CORO2A	222.729	-0.437852	0.395658	-1.10664	0.268448	0.999956
TBC1D2	227.13	-0.442198	0.360351	-1.22713	0.219773	0.999956
GABBR2	5.02213	-0.788075	1.14144	-0.690424	0.489928	0.999956
PGAP4	473.938	-0.103328	0.276382	-0.373861	0.708508	0.999956
RNF20	895.048	-0.207244	0.337486	-0.614081	0.539162	0.999956
GRIN3A	50.9985	1.16782	0.676655	1.72587	0.0843708	0.795698
TGFBR1	1247.53	0.0915756	0.359191	0.25495	0.798762	0.999956
SMC2	498.707	0.0737868	0.454771	0.16225	0.871109	0.999956
UNC13B	656.189	0.102178	0.296387	0.344745	0.730286	0.999956
ENSSSCG00000005307	0.164063	-0.898305	4.08047	-0.220147	0.825756	NA
ENSSSCG00000058191	1.87398	-0.880891	2.10694	-0.418091	0.675881	NA
ENSSSCG00000043390	1.91564	-0.233335	2.05729	-0.113419	0.909699	NA
ENSSSCG00000026960	317.952	0.0308269	0.306634	0.100533	0.919921	0.999956
ENSSSCG00000058998	0.149943	-0.898305	4.08047	-0.220147	0.825756	NA
MNS1	52.6006	0.0614085	0.626569	0.0980077	0.921926	0.999956
TEX9	23.3418	0.408921	0.636809	0.642141	0.520782	0.999956
RFX7	559.342	0.111399	0.307855	0.361857	0.717459	0.999956
ENSSSCG00000049979	0.177356	-0.898305	4.08047	-0.220147	0.825756	NA
NEDD4	514.816	0.00740101	0.32351	0.0228772	0.981748	0.999956
FAM214A	1469.67	-0.332685	0.328845	-1.01168	0.311692	0.999956
ENSSSCG00000053937	1557.54	0.3993	0.346354	1.15287	0.248966	0.999956
ENSSSCG00000048649	0.162502	1.02525	4.08047	0.251257	0.801615	NA
MYO5C	39.8443	-3.24544	1.23718	-2.62325	0.00870943	0.350749
GNB5	224.662	0.953425	0.535838	1.77932	0.0751879	0.766962
ENSSSCG00000004623	3.1333	4.07704	2.16217	1.88562	0.0593462	NA
MAPK6	2285.62	0.244332	0.433507	0.563617	0.573015	0.999956
LEO1	483.452	0.0944338	0.412084	0.229162	0.818743	0.999956
TMOD3	2076.29	0.209416	0.309507	0.676612	0.498652	0.999956
TMOD2	210.93	1.51157	0.538264	2.80824	0.00498127	0.280715
LYSMD2	257.909	0.229489	0.353653	0.64891	0.516396	0.999956
SCG3	49.0661	0.418282	0.600515	0.696539	0.486091	0.999956
DMXL2	123.735	0.238098	0.408334	0.583097	0.559828	0.999956
ENSSSCG00000039810	0.184638	1.02525	4.08047	0.251257	0.801615	NA
GLDN	25.1966	0.264216	0.694171	0.38062	0.703485	0.999956
ENSSSCG00000054479	7.39333	-4.39954	2.24868	-1.9565	0.0504059	0.661103
TNFAIP8L3	1157.65	0.261079	0.407491	0.6407	0.521718	0.999956
PRTG	0.328438	1.87251	4.04232	0.463226	0.643203	NA
ENSSSCG00000059778	0.162502	1.02525	4.08047	0.251257	0.801615	NA
PYGO1	82.4285	1.4129	0.66123	2.13678	0.0326161	0.578411
DNAAF4	1.39102	-3.89116	2.49954	-1.55675	0.11953	NA
ENSSSCG00000054223	2.9272	-0.588852	1.25009	-0.471049	0.637606	NA
CCPG1	1453.75	0.219227	0.398323	0.550374	0.582063	0.999956
PIGB	238.912	0.0288314	0.296496	0.0972405	0.922535	0.999956
RAB27A	564.277	-0.335254	0.416779	-0.804392	0.421171	0.999956
RSL24D1	1136.34	0.0757777	0.349353	0.216908	0.82828	0.999956
ENSSSCG00000058800	0.832388	1.9582	2.90713	0.673585	0.500575	NA
UNC13C	1.14369	-0.295383	2.26593	-0.130359	0.896283	NA
WDR72	1.26776	-2.59814	2.16804	-1.19838	0.230769	NA
ENSSSCG00000004656	203.269	0.157476	0.395435	0.398234	0.690458	0.999956
ENSSSCG00000024660	59.3808	0.151118	0.471404	0.32057	0.748536	0.999956
ENSSSCG00000059295	70.1155	-0.235382	0.417906	-0.563242	0.57327	0.999956
ENSSSCG00000052887	31.0184	0.89068	0.556049	1.6018	0.1092	0.85209
ENSSSCG00000056735	1.15282	0.493532	1.94909	0.253211	0.800105	NA
ENSSSCG00000042537	0.165936	1.02525	4.08047	0.251257	0.801615	NA
ENSSSCG00000062177	0.474948	0.897625	4.04353	0.22199	0.824322	NA
ENSSSCG00000047459	0.165936	1.02525	4.08047	0.251257	0.801615	NA
ENSSSCG00000062439	2.39934	-0.796104	2.01007	-0.396059	0.692062	NA
ENSSSCG00000047357	4.38656	-1.41238	1.11287	-1.26913	0.204393	0.999956
ENSSSCG00000057596	21.9189	0.559807	0.547498	1.02248	0.306553	0.999956
ENSSSCG00000046276	2.12308	-1.09883	1.4818	-0.74155	0.45836	NA
ENSSSCG00000059103	92.6095	1.29661	0.604336	2.14552	0.0319116	0.573134
ENSSSCG00000053433	0.149943	-0.898305	4.08047	-0.220147	0.825756	NA
ENSSSCG00000058974	0.164063	-0.898305	4.08047	-0.220147	0.825756	NA
ENSSSCG00000046402	1.2929	0.120894	1.89739	0.0637163	0.949196	NA
ENSSSCG00000042551	2.86512	-0.894293	1.87672	-0.47652	0.633704	NA
ENSSSCG00000057375	1.31619	0.226937	2.65995	0.0853164	0.93201	NA
ENSSSCG00000052402	4.51512	-0.494994	0.991815	-0.49908	0.617723	0.999956
ENSSSCG00000063504	8.84289	0.697295	0.788978	0.883795	0.376807	0.999956
ENSSSCG00000059306	0.659586	1.53766	3.0697	0.500917	0.616429	NA
ENSSSCG00000056674	0.177356	-0.898305	4.08047	-0.220147	0.825756	NA
ssc-mir-628	0.341419	-1.84928	4.03314	-0.458522	0.646578	NA
GALK2	390.999	-0.226486	0.357214	-0.634035	0.526058	0.999956
MYO5A	1619.84	-0.455228	0.460736	-0.988045	0.323131	0.999956
ALG2	229.206	-0.26661	0.399383	-0.667555	0.504418	0.999956
SEC61B	1226.72	-0.0547018	0.290644	-0.188209	0.850713	0.999956
NR4A3	274.14	0.241636	1.26567	0.190915	0.848592	0.999956
STX17	633.74	0.0847476	0.378427	0.223947	0.822798	0.999956
ERP44	1832	0.209912	0.338156	0.620756	0.53476	0.999956
INVS	188.796	0.687993	0.448296	1.53468	0.124862	0.892043
CYP19A1	0.162502	1.02525	4.08047	0.251257	0.801615	NA
TEX10	473.323	-0.0877485	0.335531	-0.261521	0.793691	0.999956
ENSSSCG00000055769	62.0823	0.625735	0.643179	0.972879	0.330614	0.999956
MSANTD3-TMEFF1	6.65276	0.899474	1.30697	0.688213	0.491319	0.999956
CAVIN4	37.372	7.7272	3.38541	2.2825	NA	NA
PLPPR1	14.6384	-1.37031	0.723831	-1.89314	0.0583396	0.696348
ENSSSCG00000042524	3.47411	-0.691997	1.33757	-0.517355	0.604908	NA
ENSSSCG00000038171	14.7376	-1.25547	0.899663	-1.39549	0.162869	0.96731
ENSSSCG00000005398	3.97339	-0.472778	1.48803	-0.317721	0.750697	0.999956
BAAT	1.0496	-3.48295	3.94795	-0.882217	0.377659	NA
MRPL50	312.986	0.31666	0.310888	1.01857	0.308408	0.999956
ZNF189	316.278	0.046168	0.352092	0.131125	0.895677	0.999956
ALDOB	0.981991	-2.15771	2.34605	-0.919717	0.357721	NA
GALNT12	37.0792	-0.236897	0.955709	-0.247875	0.804231	0.999956
COL15A1	1717.37	1.63771	0.761843	2.14967	0.0315814	0.571999
ALDH1B1	116.277	1.11056	0.699606	1.58741	0.11242	0.861468
IGFBPL1	1.14709	2.50943	2.7264	0.920419	0.357354	NA
ENSSSCG00000040711	3.05716	1.0752	1.19454	0.90009	0.368072	NA
CCDC180	0.491362	-2.38162	3.24968	-0.732879	0.463632	NA
ENSSSCG00000053078	271.731	0.20575	0.454634	0.452562	0.650864	0.999956
NCBP1	504.633	0.260949	0.450987	0.578618	0.562847	0.999956
TSTD2	410.387	0.0755456	0.33994	0.222232	0.824133	0.999956
XPA	74.9966	-0.246795	0.448092	-0.550768	0.581793	0.999956
TRMO	271.534	-0.328053	0.333385	-0.984008	0.325112	0.999956
ENSSSCG00000062892	3152.56	0.134382	0.28227	0.476075	0.634021	0.999956
TRIM14	43.3208	0.0613171	0.550269	0.111431	0.911274	0.999956
ENSSSCG00000022044	0.531778	2.55497	3.99178	0.640058	0.522135	NA
PHF24	3.99749	1.95105	1.25129	1.55923	0.118942	0.881071
DNAJB5	316.666	2.21918	0.932217	2.38053	NA	NA
VCP	8617.86	-0.157487	0.265646	-0.592844	0.553285	0.999956
C9orf131	2.5502	-0.116362	1.49192	-0.0779947	0.937832	NA
FANCG	337.585	-0.543155	0.323647	-1.67823	0.0933016	0.81292
PIGO	758.586	-0.247122	0.303754	-0.813561	0.415896	0.999956
STOML2	1046.06	0.00180654	0.249197	0.00724946	0.994216	0.999956
FAM214B	820.098	0.0258903	0.306719	0.0844103	0.93273	0.999956
RUSC2	762.213	0.535018	0.507497	1.05423	0.291778	0.999956
FAM166B	9.85187	0.655907	1.08237	0.605991	0.544521	0.999956
TESK1	823.688	0.0876437	0.424091	0.206663	0.836273	0.999956
ENSSSCG00000005311	27.2109	-0.234174	0.620574	-0.377351	0.705913	0.999956
SIT1	25.8586	-0.647843	0.599014	-1.08151	0.279468	0.999956
CCDC107	74.3053	0.480733	0.550755	0.872863	0.382738	0.999956
ARHGEF39	74.3065	0.0209746	0.520519	0.0402956	0.967857	0.999956
ENSSSCG00000059309	524.725	0.0903522	0.624595	0.144657	0.884981	0.999956
ENSSSCG00000005316	4572.4	3.00468	1.10748	2.71307	NA	NA
TLN1	4735.92	0.249756	0.355004	0.70353	0.481726	0.999956
CREB3	415.06	0.00833468	0.290487	0.0286921	0.97711	0.999956
GBA2	1106.89	-0.104252	0.348538	-0.299112	0.764855	0.999956
RGP1	295.326	-0.134275	0.334327	-0.401626	0.687959	0.999956
NPR2	247.505	1.38062	0.582584	2.36982	0.0177968	0.46068
SPAG8	403.693	-0.206976	0.495998	-0.417292	0.676465	0.999956
FAM221B	11.0223	1.07106	0.936982	1.1431	0.252999	0.999956
TMEM8B	65.6223	0.789267	0.780176	1.01165	0.311704	0.999956
RECK	257.678	-0.289354	0.526365	-0.549722	0.58251	0.999956
GLIPR2	502.746	2.28568	0.752063	3.03922	0.00237195	0.198216
CLTA	1486.86	0.343799	0.359621	0.956004	0.33907	0.999956
GNE	177.716	-0.528185	0.493176	-1.07099	0.284176	0.999956
RNF38	1364.64	0.019756	0.320574	0.0616271	0.95086	0.999956
MELK	115.772	0.232769	0.550568	0.42278	0.672456	0.999956
PAX5	8.51586	2.06274	1.27178	1.62193	0.104819	0.840448
ZCCHC7	381.714	0.193627	0.312721	0.619168	0.535806	0.999956
GRHPR	439.927	-0.212845	0.341802	-0.622715	0.533472	0.999956
ZBTB5	228.468	-0.638519	0.304788	-2.09496	0.0361747	0.599409
POLR1E	331.079	0.229864	0.338626	0.678813	0.497256	0.999956
FBXO10	91.0782	0.455679	0.582826	0.781843	0.434307	0.999956
ENSSSCG00000058091	548.872	-0.0769604	0.23284	-0.330529	0.741	0.999956
FRMPD1	1151.55	0.0113195	0.642818	0.0176092	0.985951	0.999956
TRMT10B	299.381	-0.348814	0.364213	-0.957719	0.338204	0.999956
EXOSC3	98.068	0.227698	0.443407	0.51352	0.607588	0.999956
DCAF10	825.323	0.118644	0.372941	0.318129	0.750387	0.999956
SLC25A51	1179.7	0.203206	0.287406	0.707035	0.479545	0.999956
ENSSSCG00000005358	745.725	0.517136	0.270733	1.91014	0.0561158	0.686983
FOXE1	30.1023	-1.19372	0.705921	-1.69101	0.0908355	0.806176
ENSSSCG00000054674	0.165936	1.02525	4.08047	0.251257	0.801615	NA
ENSSSCG00000055084	58.6402	1.895	0.998761	1.89736	0.057781	0.693197
ENSSSCG00000058329	52.7387	2.0163	1.07606	1.87377	0.0609615	0.707649
CCIN	0.184638	1.02525	4.08047	0.251257	0.801615	NA
ENSSSCG00000055284	0.350573	1.95382	4.03501	0.484217	0.628232	NA
ENSSSCG00000059392	2.44796	0.106939	1.69934	0.0629301	0.949822	NA
ENSSSCG00000053578	0.164063	-0.898305	4.08047	-0.220147	0.825756	NA
ENSSSCG00000058813	0.533339	1.05804	4.02936	0.262581	0.792873	NA
ENSSSCG00000062097	0.793949	-1.78298	2.88013	-0.619064	0.535874	NA
ENSSSCG00000056356	1.92378	0.905047	1.76683	0.512244	0.60848	NA
ENSSSCG00000061681	0.361993	0.0634756	4.08047	0.015556	0.987589	NA
ENSSSCG00000056508	0.184638	1.02525	4.08047	0.251257	0.801615	NA
ENSSSCG00000042369	127.436	0.392709	0.455501	0.862147	0.388606	0.999956
ENSSSCG00000054952	0.184638	1.02525	4.08047	0.251257	0.801615	NA
ENSSSCG00000053254	0.184638	1.02525	4.08047	0.251257	0.801615	NA
ENSSSCG00000056034	0.149943	-0.898305	4.08047	-0.220147	0.825756	NA
ENSSSCG00000042952	0.494374	2.45972	3.99751	0.615313	0.538348	NA
ENSSSCG00000049199	21.6292	0.0166345	0.718258	0.0231596	0.981523	0.999956
ENSSSCG00000049366	0.553913	2.6091	3.98868	0.654126	0.51303	NA
ENSSSCG00000041432	0.859904	0.68789	2.90052	0.237161	0.812532	NA
RNase_MRP	1.17079	1.4257	2.25374	0.632594	0.526999	NA
ENSSSCG00000063066	198.348	1.49276	0.589031	2.53426	0.0112685	0.392989
NANS	263.012	-0.0401524	0.436581	-0.0919699	0.926722	0.999956
DACT2	147.337	-0.800605	0.609726	-1.31306	0.189164	0.999956
ENSSSCG00000037372	87.6587	0.0989633	0.478697	0.206735	0.836217	0.999956
PSMB1	2321.08	-0.0572976	0.221045	-0.259212	0.795472	0.999956
PNLDC1	2.35802	0.990226	1.54007	0.642973	0.520241	NA
SMOC2	916.435	-0.707417	0.603927	-1.17136	0.241453	0.999956
MRPL18	477.695	0.0842164	0.278991	0.301861	0.762758	0.999956
TCP1	1380.82	0.27501	0.42418	0.648332	0.51677	0.999956
ACAT2	3030.62	-0.130097	0.512003	-0.254093	0.799423	0.999956
SNX9	1950.66	-0.0623301	0.31287	-0.19922	0.84209	0.999956
WTAP	1683.27	0.0768401	0.312204	0.246121	0.805588	0.999956
SOD2	973.758	0.616305	0.434338	1.41895	0.155913	0.954332
FNDC1	423.342	0.291983	0.679997	0.429388	0.667641	0.999956
DYNLT1	435.098	0.182729	0.484159	0.377414	0.705866	0.999956
TMEM181	1146.33	-0.112669	0.400682	-0.281193	0.778562	0.999956
ENSSSCG00000031776	136.974	-0.10453	0.413576	-0.252747	0.800463	0.999956
ENSSSCG00000024019	241.786	0.138833	0.272952	0.508634	0.611009	0.999956
SERAC1	366.926	-0.283706	0.372498	-0.761632	0.44628	0.999956
SYNJ2	1163.09	-0.251028	0.432664	-0.580191	0.561786	0.999956
ENSSSCG00000004017	4.40397	-1.04054	1.40634	-0.739894	0.459364	0.999956
ENSSSCG00000004016	6.70378	0.473448	1.0216	0.46344	0.643049	0.999956
AFDN	3742.32	-0.286092	0.322232	-0.887846	0.374624	0.999956
ERMARD	612.733	-0.440825	0.24596	-1.79226	0.0730913	0.76139
DYNLT2	3.86438	-0.848869	1.12815	-0.752446	0.451783	0.999956
PHF10	784.294	0.316343	0.226429	1.3971	0.162384	0.966733
C6orf120	778.699	-0.308896	0.343213	-0.900012	0.368114	0.999956
WDR27	27.4408	-0.648298	0.749157	-0.865371	0.386835	0.999956
THBS2	2787.27	0.687324	0.57145	1.20277	0.229064	0.999956
FAM120B	704.367	0.00267758	0.354826	0.00754617	0.993979	0.999956
ENSSSCG00000049216	6.28502	-0.766613	1.40111	-0.547146	0.584278	0.999956
DLL1	660.441	-0.152946	0.471519	-0.324369	0.745659	0.999956
TAGAP	181.981	-0.377602	0.587454	-0.642778	0.520368	0.999956
RSPH3	56.4451	-0.00684025	0.457642	-0.0149467	0.988075	0.999956
EZR	17803.1	-0.297759	0.495715	-0.600665	0.548063	0.999956
SYTL3	64.7933	-0.85575	0.549253	-1.55802	0.119228	0.88159
QKI	3003.98	0.452981	0.231893	1.95341	0.0507712	0.661103
PACRG	8.2759	-0.377634	0.812816	-0.464599	0.642219	0.999956
PRKN	47.1919	0.0742996	0.462599	0.160613	0.872398	0.999956
ENSSSCG00000053549	0.327299	-1.79528	4.03788	-0.444611	0.656601	NA
AGPAT4	176.847	0.0118701	0.356029	0.0333404	0.973403	0.999956
MAP3K4	878.037	-0.219329	0.314886	-0.696535	0.486094	0.999956
PLG	0.65157	1.48012	3.87927	0.381546	0.702798	NA
SLC22A3	83.8863	1.61746	0.714428	2.26399	0.0235747	0.516637
ENSSSCG00000004024	1298.23	0.17017	0.569592	0.298757	0.765125	0.999956
RPS6KA2	122.908	1.77704	0.758231	2.34366	0.0190955	0.478994
ENSSSCG00000032916	958.066	0.314322	0.700487	0.448719	0.653635	0.999956
SFT2D1	884.855	-0.24838	0.336349	-0.738461	0.460235	0.999956
TBXT	0.328438	1.87251	4.04232	0.463226	0.643203	NA
PDE10A	14.9509	1.29126	0.804741	1.60457	0.108589	0.850001
ZDHHC14	135.471	0.892424	0.552663	1.61477	0.106361	0.844791
ENSSSCG00000060508	53.2148	0.0312557	0.580238	0.053867	0.957041	0.999956
ARID1B	1688.29	-0.508115	0.295362	-1.72031	0.0853754	0.797517
SLC22A2	4.21299	3.62764	1.52575	2.37761	0.0174255	0.45449
SLC22A1	2.29644	1.8444	2.09647	0.879765	0.378987	NA
IGF2R	2373.44	-0.203475	0.262117	-0.776278	0.437585	0.999956
ENSSSCG00000051789	0.829659	-0.609614	2.9176	-0.208944	0.834492	NA
UNC93A	284.967	0.0055714	0.494882	0.011258	0.991018	0.999956
ENSSSCG00000022580	0.341419	-1.84928	4.03314	-0.458522	0.646578	NA
ENSSSCG00000032403	2.23088	-1.1283	1.90701	-0.591656	0.554081	NA
CCR6	11.4124	-1.42327	0.91584	-1.55406	0.12017	0.882687
CEP43	169.474	0.0698238	0.459995	0.151793	0.87935	0.999956
ENSSSCG00000038527	2.21453	1.92114	1.87742	1.02329	0.306171	NA
ENSSSCG00000059431	0.184638	1.02525	4.08047	0.251257	0.801615	NA
ENSSSCG00000062590	17.4302	-0.92987	1.13612	-0.818463	0.413093	0.999956
ENSSSCG00000048769	206.767	0.0288038	0.329327	0.0874625	0.930304	0.999956
ENSSSCG00000053918	3.15554	-2.41289	1.57793	-1.52914	0.126229	NA
ENSSSCG00000049642	0.498644	-0.786116	3.32278	-0.236584	0.81298	NA
ENSSSCG00000054333	1.02386	1.0204	2.37474	0.429687	0.667424	NA
ENSSSCG00000047676	42.9448	0.138494	0.575281	0.240742	0.809755	0.999956
ENSSSCG00000047753	16.6813	0.463683	0.631352	0.734429	0.462687	0.999956
ENSSSCG00000043814	3.38797	-0.538282	1.30685	-0.411893	0.680418	NA
ENSSSCG00000048885	1.42513	1.6188	2.55743	0.632981	0.526746	NA
ENSSSCG00000062746	0.691992	0.0452149	2.61233	0.0173082	0.986191	NA
ENSSSCG00000062461	2.90869	0.592938	1.51826	0.390538	0.696138	NA
ENSSSCG00000036448	0.177356	-0.898305	4.08047	-0.220147	0.825756	NA
ENSSSCG00000061338	1.30359	0.0920686	1.85239	0.0497025	0.960359	NA
ENSSSCG00000052194	0.828955	1.95234	2.42645	0.804607	0.421047	NA
ENSSSCG00000054024	4.06802	0.281728	1.12312	0.250844	0.801934	0.999956
ENSSSCG00000050646	1.98031	0.0617032	1.50356	0.041038	0.967266	NA
ENSSSCG00000058194	1.04829	3.5348	2.56371	1.37878	0.167962	NA
ENSSSCG00000053277	1.0247	-0.865015	2.33013	-0.37123	0.710466	NA
ENSSSCG00000059587	6.70593	-0.100795	0.838119	-0.120263	0.904275	0.999956
ENSSSCG00000063447	3.79469	-0.0623468	1.17308	-0.0531477	0.957614	0.999956
ENSSSCG00000058272	0.514637	0.989442	3.30554	0.299329	0.764689	NA
ENSSSCG00000053023	1.00444	0.0632427	1.86647	0.0338837	0.97297	NA
ENSSSCG00000060777	0.943892	-2.09275	2.75517	-0.759573	0.44751	NA
ENSSSCG00000052920	5.30874	-2.07346	1.12607	-1.84132	0.065574	0.722205
ENSSSCG00000046349	4.61294	1.95824	1.36486	1.43476	0.151356	0.949106
ENSSSCG00000061525	18.1795	0.238681	0.6349	0.375935	0.706965	0.999956
ENSSSCG00000046713	1.28947	0.115608	1.89734	0.0609315	0.951414	NA
ENSSSCG00000050351	32.9935	-1.60302	0.927951	-1.72749	0.08408	0.795698
ENSSSCG00000018530	5.21069	0.997991	1.14757	0.869653	0.38449	0.999956
ssc-mir-9824	0.462389	-0.725386	4.04789	-0.179201	0.85778	NA
ssc-mir-9831	0.164063	-0.898305	4.08047	-0.220147	0.825756	NA
COL12A1	3204.61	1.0514	0.524927	2.00295	0.045183	0.638334
ME1	1239.1	-0.529697	0.344504	-1.53757	0.124155	0.891382
SH3BGRL2	5274.36	-0.68634	0.426353	-1.60979	0.107443	0.848108
LCA5	21.951	-0.436175	0.608988	-0.71623	0.473849	0.999956
ENSSSCG00000046076	0.177356	-0.898305	4.08047	-0.220147	0.825756	NA
ENSSSCG00000004470	585.207	0.206884	0.384985	0.537381	0.591004	0.999956
PHIP	397.364	-0.0361397	0.520644	-0.0694135	0.94466	0.999956
IMPG1	0.326566	0.0634756	4.08047	0.015556	0.987589	NA
MYO6	2303.46	-0.0267428	0.544419	-0.0491218	0.960822	0.999956
SENP6	1704.49	-0.0702377	0.281146	-0.249827	0.802721	0.999956
RWDD2A	122.078	-0.536396	0.318703	-1.68306	0.0923638	0.810461
PGM3	253.112	-0.0639157	0.502444	-0.12721	0.898774	0.999956
DOP1A	796.012	-0.172562	0.458276	-0.376547	0.70651	0.999956
UBE3D	140.587	-0.207458	0.517411	-0.400954	0.688454	0.999956
ENSSSCG00000053568	0.66187	1.5073	3.86515	0.389972	0.696557	NA
TPBG	632.741	-0.0309566	0.344517	-0.0898553	0.928402	0.999956
IBTK	816.695	-0.1484	0.347589	-0.426941	0.669422	0.999956
IRAK1BP1	90.5888	-0.026917	0.310106	-0.0867991	0.930831	0.999956
MEI4	0.149943	-0.898305	4.08047	-0.220147	0.825756	NA
RWDD1	922.049	0.275197	0.239889	1.14718	0.251306	0.999956
SNAP91	12.1742	-1.28824	1.6377	-0.786615	0.431507	0.999956
PRSS35	30.3345	-0.617731	0.673693	-0.916933	0.359178	0.999956
FILIP1	255.687	2.65047	0.896721	2.95573	0.00311928	0.220904
TMEM30A	2531.13	0.072848	0.328563	0.221717	0.824534	0.999956
COX7A2	886.835	0.198309	0.22568	0.878719	0.379554	0.999956
ENSSSCG00000053516	0.494374	2.45972	3.99751	0.615313	0.538348	NA
NT5DC1	468.898	0.0935331	0.386092	0.242256	0.808582	0.999956
COL10A1	2.53711	2.00139	1.57744	1.26876	0.204528	NA
TSPYL1	519.641	-0.55391	0.439357	-1.26073	0.207406	0.999956
ENSSSCG00000004441	429.636	0.218163	0.399227	0.546463	0.584748	0.999956
CALHM6	5.32305	-0.420471	1.10869	-0.379251	0.704502	0.999956
TRAPPC3L	1.73001	3.16255	2.0039	1.5782	0.114519	NA
CALHM5	151.65	0.367832	0.714069	0.515121	0.606469	0.999956
CALHM4	5.04921	0.522663	1.28052	0.408166	0.683152	0.999956
TENT5A	2658.85	-0.171627	0.676293	-0.253777	0.799668	0.999956
BCKDHB	360.132	-0.466515	0.566334	-0.823745	0.410085	0.999956
TTK	365.769	-0.453349	0.490748	-0.923792	0.355594	0.999956
ELOVL4	4394.26	0.0976871	0.571859	0.170824	0.864362	0.999956
ENSSSCG00000049571	0.805369	-3.09774	2.74487	-1.12856	0.259085	NA
HTR1B	63.6488	-0.647257	0.579026	-1.11784	0.263636	0.999956
ENSSSCG00000047800	116.918	0.407069	0.582532	0.698792	0.484682	0.999956
ENSSSCG00000059566	1.02845	1.09341	2.32515	0.470256	0.638172	NA
ENSSSCG00000058663	2.14812	0.737318	1.52261	0.484247	0.628211	NA
ENSSSCG00000062560	484.53	0.0447853	0.245524	0.182407	0.855264	0.999956
ENSSSCG00000050897	5.08569	0.568888	1.3307	0.427511	0.669007	0.999956
ENSSSCG00000042605	0.184638	1.02525	4.08047	0.251257	0.801615	NA
ENSSSCG00000063246	0.491362	-2.38162	3.24968	-0.732879	0.463632	NA
ENSSSCG00000054792	0.164063	-0.898305	4.08047	-0.220147	0.825756	NA
ENSSSCG00000057254	0.164063	-0.898305	4.08047	-0.220147	0.825756	NA
ENSSSCG00000053627	1.77656	0.318525	1.7137	0.18587	0.852547	NA
ENSSSCG00000063024	1.17651	1.37259	2.7098	0.506526	0.612487	NA
ENSSSCG00000059782	0.669545	-2.82634	3.75633	-0.752421	0.451798	NA
ENSSSCG00000056387	0.164063	-0.898305	4.08047	-0.220147	0.825756	NA
ENSSSCG00000054452	0.162502	1.02525	4.08047	0.251257	0.801615	NA
ENSSSCG00000054905	0.165936	1.02525	4.08047	0.251257	0.801615	NA
ENSSSCG00000052113	0.165936	1.02525	4.08047	0.251257	0.801615	NA
ENSSSCG00000059547	0.184638	1.02525	4.08047	0.251257	0.801615	NA
ENSSSCG00000050407	0.369276	2.01981	4.02936	0.501272	0.616179	NA
ENSSSCG00000053341	0.149943	-0.898305	4.08047	-0.220147	0.825756	NA
ENSSSCG00000054079	0.858632	-1.91124	2.90116	-0.658786	0.510033	NA
ENSSSCG00000059005	0.149943	-0.898305	4.08047	-0.220147	0.825756	NA
ENSSSCG00000051809	27.6691	0.735102	0.524528	1.40145	0.161078	0.964323
ENSSSCG00000061057	79.1522	0.989964	0.66275	1.49372	0.135248	0.914875
ENSSSCG00000055281	0.184638	1.02525	4.08047	0.251257	0.801615	NA
ENSSSCG00000054854	0.34714	1.94125	4.03611	0.48097	0.630538	NA
UBE2J1	1152.08	0.0977297	0.261781	0.373327	0.708905	0.999956
RRAGD	374.972	-0.233012	0.3785	-0.61562	0.538146	0.999956
ANKRD6	282.883	-0.682819	0.500257	-1.36493	0.172274	0.983407
ENSSSCG00000004324	138.422	0.112061	0.421652	0.265766	0.790419	0.999956
MDN1	1022.72	0.125037	0.381328	0.327898	0.742988	0.999956
ENSSSCG00000054691	0.494374	2.45972	3.99751	0.615313	0.538348	NA
MAP3K7	785.245	0.0519732	0.37734	0.137736	0.890449	0.999956
NT5E	286.757	0.758078	0.580194	1.30659	0.191351	0.999956
SNX14	1452.25	-0.22343	0.332702	-0.671563	0.501862	0.999956
ENSSSCG00000004294	5735.68	0.0397345	0.450785	0.0881451	0.929761	0.999956
RNGTT	562.669	0.206468	0.302723	0.682035	0.495217	0.999956
PNRC1	2272.29	0.0968696	0.294243	0.329216	0.741992	0.999956
SRSF12	41.2667	-0.630179	0.506141	-1.24507	0.213107	0.999956
PM20D2	444.51	-0.474525	0.640584	-0.74077	0.458833	0.999956
GABRR2	9.79607	0.0445421	0.893512	0.0498505	0.960241	0.999956
CYB5R4	100.488	-0.0468775	0.362497	-0.129318	0.897106	0.999956
MRAP2	39.3926	-0.644945	0.596457	-1.08129	0.279567	0.999956
CEP162	165.789	-0.237009	0.368384	-0.643374	0.519982	0.999956
TBX18	60.0077	1.11751	0.628399	1.77834	0.0753478	0.768137
ENSSSCG00000051834	56.7176	-0.0286242	0.414743	-0.0690168	0.944976	0.999956
B3GAT2	35.9174	0.429356	0.635131	0.676012	0.499033	0.999956
OGFRL1	338.985	0.177083	0.324222	0.546178	0.584944	0.999956
HTR1E	0.149943	-0.898305	4.08047	-0.220147	0.825756	NA
CGA	2.08228	-1.62747	1.54741	-1.05174	0.292919	NA
ZNF292	518.886	-0.0220619	0.436718	-0.0505174	0.95971	0.999956
SMIM8	52.1398	0.175628	0.426122	0.412154	0.680227	0.999956
ENSSSCG00000055021	7.73367	-1.04342	0.872441	-1.19598	0.231704	0.999956
ENSSSCG00000004302	0.532067	-2.48719	3.98845	-0.623599	0.532891	NA
SLC35A1	458.191	-0.0747052	0.337515	-0.221339	0.824828	0.999956
RARS2	244.598	-0.0829268	0.293586	-0.282462	0.777589	0.999956
ORC3	229.143	-0.125026	0.352632	-0.35455	0.722927	0.999956
ENSSSCG00000004307	909.111	0.302896	0.31335	0.966639	0.333725	0.999956
SPACA1	3.67062	5.3436	2.6542	2.01326	0.0440874	0.632005
CNR1	10.2434	2.82011	1.17013	2.41009	0.0159486	0.4386
ENSSSCG00000050040	4.52169	2.23635	1.25543	1.78135	0.0748555	0.765388
CASP8AP2	334.395	-0.0977968	0.448628	-0.217991	0.827436	0.999956
GJA10	5.27148	-0.287601	0.946723	-0.303786	0.761291	0.999956
BACH2	138.332	-0.171208	0.419019	-0.408592	0.682839	0.999956
ENSSSCG00000044269	0.951457	0.0702645	2.82259	0.0248937	0.98014	NA
RIMS1	7.63217	-1.45306	1.0628	-1.36719	0.171565	0.981234
KCNQ5	39.2387	2.53692	0.935678	2.71132	0.00670155	0.318915
ENSSSCG00000046325	0.184638	1.02525	4.08047	0.251257	0.801615	NA
ENSSSCG00000053554	0.162502	1.02525	4.08047	0.251257	0.801615	NA
DPPA5	0.662708	-1.38709	3.0612	-0.453119	0.650463	NA
ENSSSCG00000058051	0.519219	1.05804	4.02936	0.262581	0.792873	NA
ENSSSCG00000004287	0.325005	1.8594	4.04353	0.459845	0.645628	NA
EPHA7	10.6507	-1.09549	0.817297	-1.34038	0.180122	0.991108
ENSSSCG00000057761	0.165936	1.02525	4.08047	0.251257	0.801615	NA
ENSSSCG00000029003	367.534	0.146215	0.283504	0.515742	0.606035	0.999956
ENSSSCG00000051452	0.462389	-0.725386	4.04789	-0.179201	0.85778	NA
GJB7	1.27348	-0.60042	2.22324	-0.270065	0.78711	NA
ENSSSCG00000052938	0.500517	0.989565	3.33117	0.297062	0.766419	NA
ENSSSCG00000058397	34.1046	0.598846	1.03934	0.576179	0.564494	0.999956
ENSSSCG00000061089	12.5289	0.0831432	1.15052	0.072266	0.94239	0.999956
ENSSSCG00000062109	0.497084	0.977817	3.33572	0.293135	0.769419	NA
ENSSSCG00000042663	25.199	-0.133103	0.698286	-0.190613	0.848829	0.999956
ENSSSCG00000050380	1.46224	-0.280359	1.75923	-0.159364	0.873382	NA
ENSSSCG00000056220	0.149943	-0.898305	4.08047	-0.220147	0.825756	NA
ENSSSCG00000062121	0.495934	0.923752	4.04112	0.228588	0.819189	NA
ENSSSCG00000060869	0.164063	-0.898305	4.08047	-0.220147	0.825756	NA
ENSSSCG00000057321	0.825521	1.94647	2.42737	0.801883	0.42262	NA
ENSSSCG00000063094	3.91355	-1.25622	1.37401	-0.914275	0.360572	0.999956
ENSSSCG00000045140	0.165936	1.02525	4.08047	0.251257	0.801615	NA
ENSSSCG00000055444	0.184638	1.02525	4.08047	0.251257	0.801615	NA
ENSSSCG00000060394	6.34694	-0.0235053	1.01506	-0.0231567	0.981525	0.999956
ENSSSCG00000051930	26.201	-0.46188	0.622292	-0.742223	0.457952	0.999956
ENSSSCG00000060291	11.6665	-0.613034	0.690357	-0.887996	0.374543	0.999956
ENSSSCG00000058267	5.55535	-1.88299	1.10743	-1.70033	0.0890693	0.804721
ENSSSCG00000053987	0.666452	1.55412	3.06432	0.507165	0.612039	NA
ENSSSCG00000048267	0.164063	-0.898305	4.08047	-0.220147	0.825756	NA
ENSSSCG00000053017	0.808069	-1.81044	2.92536	-0.618877	0.535997	NA
ENSSSCG00000061618	1.14182	-1.20271	2.00778	-0.599028	0.549154	NA
ENSSSCG00000062627	0.149943	-0.898305	4.08047	-0.220147	0.825756	NA
ENSSSCG00000044841	1122.7	0.162567	0.274613	0.591988	0.553859	0.999956
ENSSSCG00000038663	3.06217	2.42408	2.42369	1.00016	0.317233	NA
ENSSSCG00000037982	4.25725	-0.883593	1.2764	-0.692256	0.488777	0.999956
ENSSSCG00000019135	0.329999	0.0634756	4.08047	0.015556	0.987589	NA
ssc-mir-30a	1.16781	-0.181686	2.71698	-0.0668703	0.946685	NA
SMAP1	455.674	-0.15256	0.419321	-0.363827	0.715987	0.999956
FREM1	32.2004	-1.89558	0.899444	-2.1075	0.0350745	0.596892
CER1	0.612333	-1.30561	3.94751	-0.330744	0.740838	NA
ZDHHC21	481.903	0.5818	0.596952	0.974616	0.329751	0.999956
SH3GL2	61.4329	-0.0883493	0.565243	-0.156303	0.875794	0.999956
CNTLN	153.444	0.430765	0.382423	1.12641	0.259992	0.999956
ENSSSCG00000044896	0.867787	0.568862	2.45587	0.231634	0.816822	NA
BNC2	146.544	-0.0313085	0.38864	-0.0805591	0.935793	0.999956
CCDC171	3.66921	0.39783	1.27307	0.312498	0.754662	0.999956
PSIP1	302.466	0.361655	0.376252	0.961203	0.33645	0.999956
SNAPC3	422.796	0.477789	0.313203	1.52549	0.127136	0.897541
TTC39B	742.896	0.139657	0.518415	0.269392	0.787628	0.999956
PTPRD	16.232	0.0889306	1.25685	0.0707566	0.943592	0.999956
DMAC1	60.4222	0.285362	0.445425	0.64065	0.52175	0.999956
NFIB	725.951	0.279494	0.588292	0.475094	0.63472	0.999956
MPDZ	359.08	1.36613	0.66441	2.05615	0.0397679	0.611388
LURAP1L	91.2057	0.62678	0.449914	1.39311	0.163586	0.969225
TYRP1	47.2227	-0.290297	1.11271	-0.260891	0.794176	0.999956
ENSSSCG00000046128	0.658437	1.5016	3.06406	0.490068	0.624086	NA
ENSSSCG00000046197	0.856367	1.95236	2.40932	0.810337	0.417747	NA
ENSSSCG00000054669	16.6143	-0.279023	0.907713	-0.307391	0.758546	0.999956
ENSSSCG00000057687	0.329999	0.0634756	4.08047	0.015556	0.987589	NA
ENSSSCG00000054565	0.334581	0.0634756	4.08047	0.015556	0.987589	NA
ENSSSCG00000062321	0.149943	-0.898305	4.08047	-0.220147	0.825756	NA
ENSSSCG00000041617	1.1811	-0.20729	2.71425	-0.076371	0.939124	NA
ENSSSCG00000061754	130.511	0.0540727	0.509989	0.106027	0.915561	0.999956
ENSSSCG00000059040	0.149943	-0.898305	4.08047	-0.220147	0.825756	NA
ENSSSCG00000061808	0.613893	-2.71078	3.8403	-0.705879	0.480264	NA
ENSSSCG00000059068	0.334581	0.0634756	4.08047	0.015556	0.987589	NA
ENSSSCG00000061890	36.9088	0.276014	1.14036	0.242041	0.808748	0.999956
ENSSSCG00000062118	0.165936	1.02525	4.08047	0.251257	0.801615	NA
ENSSSCG00000054940	1.31813	-2.62867	2.15931	-1.21737	0.223465	NA
ENSSSCG00000054761	1.58822	-1.86338	1.92874	-0.966111	0.333989	NA
ENSSSCG00000063121	0.504654	-2.41683	3.99249	-0.605345	0.54495	NA
ENSSSCG00000056585	0.177356	-0.898305	4.08047	-0.220147	0.825756	NA
ECPAS	2694.25	0.013821	0.226184	0.061105	0.951276	0.999956
ZNF483	11.6338	-0.323701	0.81192	-0.398685	0.690125	0.999956
PTGR1	1360.57	-0.320974	0.579464	-0.553915	0.579637	0.999956
ENSSSCG00000042365	21.0342	-0.11236	0.691268	-0.162542	0.870879	0.999956
ENSSSCG00000005460	597.668	0.218609	0.260858	0.838039	0.402009	0.999956
GNG10	1346.64	0.617208	0.266895	2.31255	0.0207474	0.48515
SHOC1	2.28693	1.36088	1.66277	0.818439	0.413107	NA
UGCG	384.657	-0.114989	0.483639	-0.237759	0.812068	0.999956
PTBP3	4512.66	0.244682	0.481806	0.507843	0.611564	0.999956
HSDL2	635.6	0.597109	0.404059	1.47778	0.139468	0.924836
KIAA1958	6.15921	-0.204352	0.98056	-0.208403	0.834914	0.999956
INIP	562.836	0.144736	0.263865	0.548523	0.583333	0.999956
SNX30	218.912	-0.381499	0.349316	-1.09213	0.274775	0.999956
SLC46A2	1200.1	-0.536749	0.625272	-0.858425	0.390658	0.999956
SAL1	34.9881	-1.96195	0.87568	-2.24048	0.0250595	0.528494
ENSSSCG00000047560	1.006	-0.918268	2.06515	-0.44465	0.656573	NA
ENSSSCG00000005475	19.5281	1.18096	0.638431	1.84979	0.0643445	0.719543
ENSSSCG00000005440	304.943	0.069462	0.307287	0.226049	0.821163	0.999956
ELP1	542.691	0.192869	0.364008	0.529849	0.596216	0.999956
TMEM245	1360.88	0.15165	0.254666	0.595487	0.551518	0.999956
ENSSSCG00000048786	0.809113	-0.519743	2.92748	-0.177539	0.859085	NA
FRRS1L	5.90322	1.20449	1.26107	0.955132	0.339511	0.999956
EPB41L4B	653.749	-0.454679	0.491844	-0.924437	0.355259	0.999956
PTPN3	1418.56	-0.566434	0.373153	-1.51797	0.129022	0.901144
PALM2AKAP2	1357.12	1.72279	0.695358	2.47756	0.0132285	0.414441
C9orf152	75.9639	-1.47544	0.701705	-2.10265	0.0354962	0.598586
ENSSSCG00000005453	4432.63	0.0273709	0.420047	0.0651615	0.948045	0.999956
TXNDC8	0.164063	-0.898305	4.08047	-0.220147	0.825756	NA
SVEP1	1043.27	2.27395	0.713664	3.1863	0.00144105	0.165126
MUSK	8.06234	3.94191	2.57319	1.53191	0.125544	0.892043
LPAR1	507.306	1.45253	0.473455	3.06794	0.0021554	0.195397
ENSSSCG00000044924	0.553913	2.6091	3.98868	0.654126	0.51303	NA
ENSSSCG00000059028	0.184638	1.02525	4.08047	0.251257	0.801615	NA
ENSSSCG00000057569	0.184638	1.02525	4.08047	0.251257	0.801615	NA
ENSSSCG00000053039	299.055	-0.163935	0.296313	-0.553248	0.580094	0.999956
NIPSNAP3A	114.188	0.193429	0.363795	0.531698	0.594935	0.999956
ABCA1	1067.11	-0.690552	0.259223	-2.66393	0.00772331	0.335223
SLC44A1	3429.61	0.279464	0.323789	0.863104	0.38808	0.999956
FSD1L	223.555	-0.186109	0.390813	-0.47621	0.633925	0.999956
TAL2	0.923189	3.34978	3.95599	0.84676	0.397129	NA
TMEM38B	215.644	0.614912	0.342497	1.79538	0.0725935	0.759427
ZNF462	223.089	0.0171691	0.294296	0.0583397	0.953478	0.999956
RAD23B	4381.01	-0.0196979	0.32359	-0.060873	0.95146	0.999956
KLF4	15617.5	-0.278215	0.460044	-0.604757	0.545341	0.999956
ENSSSCG00000031596	0.312446	0.0634756	4.08047	0.015556	0.987589	NA
COL27A1	303.147	1.19651	0.630377	1.89808	0.0576854	0.693197
ENSSSCG00000005488	0.315879	0.0634756	4.08047	0.015556	0.987589	NA
AKNA	135.533	0.483851	0.559336	0.865045	0.387014	0.999956
WHRN	21.3469	0.709441	0.657278	1.07936	0.280426	0.999956
ENSSSCG00000053522	1885.98	0.0655476	0.232298	0.28217	0.777813	0.999956
FAM189A2	821.807	-0.421299	0.497242	-0.847271	0.396844	0.999956
ENSSSCG00000048487	1.19979	1.46507	2.2514	0.65074	0.515215	NA
VLDLR	957.833	-0.167131	0.265521	-0.629445	0.529058	0.999956
TEX48	0.184638	1.02525	4.08047	0.251257	0.801615	NA
ENSSSCG00000059646	11.7237	-0.75272	0.846873	-0.888823	0.374098	0.999956
TNFSF8	21.5621	0.136532	0.700226	0.194983	0.845406	0.999956
TNC	799.39	0.89202	0.515896	1.72907	0.0837969	0.795698
ENSSSCG00000041522	1.94477	2.29872	2.11959	1.08451	0.278138	NA
SMARCA2	1621.69	0.0653527	0.378589	0.172622	0.862949	0.999956
SUSD1	27.6528	-0.552657	0.514835	-1.07346	0.283063	0.999956
FKBP15	757.148	-0.136919	0.281981	-0.485561	0.627279	0.999956
KDM4C	350.937	0.0620746	0.317372	0.195589	0.844932	0.999956
GLDC	5.23554	0.0704609	0.967895	0.0727981	0.941967	0.999956
UHRF2	489.516	0.228707	0.267635	0.854548	0.392802	0.999956
RANBP6	992.311	-0.0751377	0.417698	-0.179885	0.857243	0.999956
IL33	1381.3	2.3971	0.641092	3.73909	0.00018469	0.055692
DMRT2	28.4434	1.91677	1.35914	1.41028	0.158457	0.960969
DMRT3	7.17417	-4.35185	1.6197	-2.68683	0.00721332	0.327996
DMRT1	0.694569	-1.52453	3.83385	-0.397648	0.69089	NA
KANK1	4695.51	0.006595	0.439039	0.0150214	0.988015	0.999956
ZNF618	63.9998	-0.60734	0.429808	-1.41305	0.157641	0.960147
AMBP	2.28861	-2.49323	1.61997	-1.53906	0.123789	NA
SLC31A2	324.014	-0.933213	0.470372	-1.98399	0.0472573	0.64825
DOCK8	836.3	-0.549873	0.467848	-1.17532	0.239865	0.999956
KIF12	30.048	0.130573	0.638469	0.204509	0.837956	0.999956
SLC31A1	1181.48	-0.749011	0.503693	-1.48704	0.137005	0.920094
SMPDL3A	534.964	-0.67574	0.486409	-1.38924	0.164759	0.973086
CDC26	323.87	0.226866	0.308368	0.735699	0.461914	0.999956
PRPF4	564.451	-0.0775797	0.273468	-0.283688	0.776649	0.999956
FABP7	6.34807	-2.14525	1.29619	-1.65505	0.097915	0.820557
PKIB	415.267	-0.497135	0.680185	-0.730882	0.464851	0.999956
RNF183	29.1369	-0.0920892	0.605486	-0.152091	0.879115	0.999956
WDR31	101.61	0.141091	0.56257	0.250798	0.80197	0.999956
ENSSSCG00000005241	253.427	-0.111989	0.291165	-0.384624	0.700516	0.999956
SERINC1	3635.68	0.266245	0.265829	1.00157	0.316553	0.999956
BSPRY	94.1148	-0.272558	0.573012	-0.475658	0.634318	0.999956
HDHD3	75.5491	-0.0289177	0.594047	-0.0486791	0.961175	0.999956
ALAD	296.077	0.0538806	0.549294	0.0980906	0.92186	0.999956
ENSSSCG00000005478	673.907	-0.190333	0.274797	-0.692633	0.48854	0.999956
ENSSSCG00000041279	0.177356	-0.898305	4.08047	-0.220147	0.825756	NA
C9orf43	3.40444	1.3597	1.38595	0.981061	0.326563	NA
PERP	70713.5	-0.204196	0.521744	-0.391372	0.695522	0.999956
HSF2	445.508	0.489988	0.325651	1.50464	0.132416	0.907778
SLC2A12	402.737	-0.33189	0.404889	-0.819706	0.412384	0.999956
PGM5	494.514	0.972458	0.580621	1.67486	0.093962	0.81292
ENSSSCG00000053708	615.654	1.39117	0.676241	2.05721	0.0396657	0.610908
RNF217	146.277	0.350347	0.538562	0.650522	0.515355	0.999956
TBPL1	161.084	0.253913	0.375207	0.676728	0.498578	0.999956
NKAIN2	2.89766	-0.440911	1.29544	-0.340357	0.733587	NA
TMEM252	0.462389	-0.725386	4.04789	-0.179201	0.85778	NA
PIP5K1B	24.2446	-0.840024	1.0807	-0.777297	0.436984	0.999956
TRDN	451.084	8.33115	2.57639	3.23365	NA	NA
TCF21	17.4866	3.0081	1.12486	2.67419	0.00749106	0.331459
ACTL7A	0.184638	1.02525	4.08047	0.251257	0.801615	NA
EYA4	74.7784	5.17952	1.14291	4.53187	5.8465e-06	0.00717783
FXN	198.494	0.212837	0.472174	0.450761	0.652162	0.999956
ENSSSCG00000005413	0.164063	-0.898305	4.08047	-0.220147	0.825756	NA
ENSSSCG00000005247	2146.49	-0.088898	0.352369	-0.252286	0.80082	0.999956
ENSSSCG00000061470	0.184638	1.02525	4.08047	0.251257	0.801615	NA
TNFAIP3	941.348	-0.881926	0.78373	-1.12529	0.260465	0.999956
ENSSSCG00000053150	6.82728	-0.322081	0.86123	-0.373978	0.708421	0.999956
ENSSSCG00000048390	0.553913	2.6091	3.98868	0.654126	0.51303	NA
ENSSSCG00000005432	2.09427	0.561893	1.73445	0.32396	0.745968	NA
ENSSSCG00000051392	7.0241	0.0285425	0.93952	0.0303799	0.975764	0.999956
CLVS2	1.17308	-0.296641	1.94993	-0.152129	0.879085	NA
REPS1	1025.36	0.00510513	0.326043	0.0156579	0.987507	0.999956
ENSSSCG00000049191	0.354711	-1.89772	4.02903	-0.471013	0.637632	NA
ENSSSCG00000057298	0.491362	-2.38162	3.24968	-0.732879	0.463632	NA
ENSSSCG00000058964	0.361993	0.0634756	4.08047	0.015556	0.987589	NA
ENSSSCG00000053631	0.327299	-1.79528	4.03788	-0.444611	0.656601	NA
RPS12	17995.7	0.25693	0.316586	0.811566	0.417041	0.999956
ENSSSCG00000061663	0.165936	1.02525	4.08047	0.251257	0.801615	NA
ENSSSCG00000043047	0.497807	2.46879	3.99695	0.617667	0.536795	NA
ENSSSCG00000051799	22.678	0.0757423	0.599446	0.126354	0.899452	0.999956
SLC18B1	59.4845	0.4007	0.435742	0.919581	0.357792	0.999956
ENSSSCG00000054311	1.63318	-1.89744	1.78	-1.06598	0.286434	NA
ENSSSCG00000061287	14.9726	-1.35472	1.02167	-1.326	0.184841	0.999956
ENSSSCG00000055774	0.315879	0.0634756	4.08047	0.015556	0.987589	NA
ENSSSCG00000054387	0.47807	-2.34636	3.99673	-0.587069	0.557157	NA
ENSSSCG00000041449	1072.15	-0.0533842	0.282091	-0.189244	0.849901	0.999956
ENSSSCG00000062879	0.164063	-0.898305	4.08047	-0.220147	0.825756	NA
ENSSSCG00000043626	0.484525	-0.725386	4.04789	-0.179201	0.85778	NA
ENSSSCG00000060784	2.35376	0.993408	1.64877	0.602513	0.546833	NA
ENSSSCG00000047804	0.334581	0.0634756	4.08047	0.015556	0.987589	NA
ENSSSCG00000004179	38.9177	-0.31047	0.872478	-0.355849	0.721954	0.999956
ENSSSCG00000062611	8.72334	-0.362418	0.915156	-0.396018	0.692092	0.999956
ENSSSCG00000055985	1.31844	-0.658331	1.69012	-0.389517	0.696894	NA
TNFSF15	86.4727	-0.229842	0.53751	-0.427605	0.668939	0.999956
ENSSSCG00000049638	1.84182	1.58435	1.97632	0.801666	0.422746	NA
ENSSSCG00000051325	6.20324	0.433162	0.906937	0.47761	0.632928	0.999956
ECT2L	3.66533	-0.176676	1.08675	-0.162573	0.870855	0.999956
ENSSSCG00000044363	9.33816	-0.218159	0.898583	-0.242782	0.808175	0.999956
CCDC28A	200.208	0.119708	0.441562	0.271101	0.786314	0.999956
ENSSSCG00000060050	0.314007	-1.7442	4.04252	-0.431463	0.666132	NA
NHSL1	1380.26	-0.221771	0.423263	-0.523956	0.600309	0.999956
ENSSSCG00000004150	1110.15	-0.0331955	0.371512	-0.0893525	0.928802	0.999956
SMIM28	0.494062	-0.837821	4.03749	-0.20751	0.835611	NA
VNN1	4.91487	1.73538	1.19275	1.45494	0.145685	0.938503
ENSSSCG00000004151	2.66141	-1.02283	1.57836	-0.648036	0.516962	NA
ENSSSCG00000054150	16.9757	0.827836	0.927385	0.892656	0.372041	0.999956
ARFGEF3	23.9027	0.423068	1.08063	0.391499	0.695428	0.999956
ENPP1	416.875	1.24372	0.707925	1.75686	0.0789423	0.777125
SGK1	1847.43	0.730668	0.358728	2.03683	0.0416668	0.619523
CCDC68	75.4906	-0.704965	0.85033	-0.829048	0.407077	0.999956
MBD2	938.628	-0.0229471	0.427197	-0.0537156	0.957162	0.999956
MYB	40.9243	-0.573235	0.773331	-0.741255	0.458539	0.999956
ENPP3	114.056	-1.62193	0.920349	-1.7623	0.0780188	0.773795
POLI	109.444	-0.0557927	0.434302	-0.128465	0.897781	0.999956
ATP6V1G1	71.2927	0.980414	0.563164	1.7409	0.0817007	0.787125
MED23	699.286	-0.094695	0.309893	-0.305573	0.75993	0.999956
RGS3	155.183	1.54186	0.624564	2.4687	0.0135605	0.415768
CITED2	1266.18	0.159761	0.494806	0.322876	0.746789	0.999956
TXLNB	168.534	3.96501	1.85993	2.13181	NA	NA
STARD6	14.5379	0.611044	0.749708	0.815043	0.415047	0.999956
C18orf54	51.4241	0.39928	0.412287	0.968451	0.332819	0.999956
HECA	2788.07	-0.0591772	0.38472	-0.153819	0.877753	0.999956
ABRACL	348.197	-0.359524	0.454233	-0.791496	0.428655	0.999956
ENSSSCG00000060550	290.624	0.151543	0.403623	0.375456	0.707322	0.999956
APBA1	87.247	0.521921	0.522338	0.999202	0.317697	0.999956
ENSSSCG00000038606	1.00745	3.48481	2.57689	1.35233	0.176269	NA
ENSSSCG00000042812	8.30361	2.86344	1.84871	1.54889	0.121409	0.883993
ALDH8A1	9.60679	-0.570216	1.25265	-0.455208	0.64896	0.999956
PTAR1	182.179	0.311911	0.578287	0.539371	0.589631	0.999956
RAB27B	2335.61	-0.0607832	0.615506	-0.0987532	0.921334	0.999956
ENSSSCG00000043320	0.149943	-0.898305	4.08047	-0.220147	0.825756	NA
RNF111	550.752	0.189009	0.341457	0.553536	0.579897	0.999956
C9orf135	6.83751	-1.03976	0.97169	-1.07006	0.284594	0.999956
MAMDC2	414.195	1.40264	0.6934	2.02284	0.0430899	0.625685
UTRN	1955.91	0.0651072	0.346913	0.187676	0.851131	0.999956
ENSSSCG00000005255	594.574	-0.00505164	0.368637	-0.0137036	0.989066	0.999956
SLTM	1572.02	-0.137333	0.338855	-0.405286	0.685267	0.999956
KLF9	1567.23	0.413156	0.372215	1.10999	0.267002	0.999956
TRPM3	5.53788	-0.00585339	0.990964	-0.00590676	0.995287	0.999956
ENSSSCG00000057517	4.29994	0.245251	1.12007	0.21896	0.826681	0.999956
STX11	313.185	0.176752	0.459185	0.384926	0.700292	0.999956
PLAGL1	299.095	-0.0568801	0.453042	-0.125551	0.900087	0.999956
ZC2HC1B	1.00329	-0.00684532	2.80676	-0.00243887	0.998054	NA
ENSSSCG00000034769	1.79485	-0.219269	1.73766	-0.126187	0.899584	NA
MINDY2	220.968	0.383695	0.573155	0.669445	0.503212	0.999956
CEMIP2	413.918	0.49555	0.357815	1.38493	0.166073	0.975483
RORA	2408.81	-0.201281	0.473682	-0.424928	0.670889	0.999956
RFX3	20.1239	-0.182748	0.742879	-0.246	0.805682	0.999956
HDDC2	124.524	-0.317472	0.346199	-0.917023	0.35913	0.999956
TPD52L1	27.7682	-2.29554	1.1246	-2.0412	0.0412307	0.616507
ENSSSCG00000039823	4.68903	1.11451	1.22438	0.91027	0.36268	0.999956
PUM3	705.452	0.00924846	0.375924	0.024602	0.980372	0.999956
SPATA6L	27.2702	-0.173039	0.577838	-0.29946	0.764589	0.999956
SLC1A1	129.534	-0.171597	0.471903	-0.363627	0.716137	0.999956
ENSSSCG00000040918	712.029	-0.0947822	0.430614	-0.220109	0.825786	0.999956
GLIS3	89.091	1.52161	0.691694	2.19983	0.027819	0.544593
ENSSSCG00000039614	0.495934	0.923752	4.04112	0.228588	0.819189	NA
ICE2	403.735	-0.00635244	0.306898	-0.0206989	0.983486	0.999956
PHACTR2	289.818	1.44769	0.458815	3.15528	0.00160344	0.17755
KIAA2026	716.04	0.0301746	0.349104	0.0864343	0.931121	0.999956
MLANA	2.24748	-0.747369	1.60225	-0.46645	0.640894	NA
ANXA2	33160.6	0.312357	0.247512	1.26198	0.206955	0.999956
ERMP1	917.438	-0.32556	0.52931	-0.615065	0.538512	0.999956
ARG1	28.2336	2.08093	1.08753	1.91344	0.0556912	0.685368
FUCA2	608.704	1.13655	0.470516	2.41554	0.015712	0.434875
RIC1	810.827	0.204206	0.446391	0.457461	0.647339	0.999956
PEX3	964.63	-0.570364	0.501301	-1.13777	0.255217	0.999956
AKAP7	167.621	0.298597	0.497538	0.600149	0.548407	0.999956
ADAT2	109.044	0.268155	0.341866	0.784387	0.432813	0.999956
PDCD1LG2	36.5497	-0.960734	0.962354	-0.998317	0.318126	0.999956
AIG1	584.966	0.355985	0.317373	1.12166	0.262006	0.999956
CD274	224.066	0.569809	0.668502	0.852366	0.394011	0.999956
ENSSSCG00000044542	0.494374	2.45972	3.99751	0.615313	0.538348	NA
HIVEP2	1347.47	0.224318	0.501242	0.447524	0.654497	0.999956
ENSSSCG00000048426	0.165936	1.02525	4.08047	0.251257	0.801615	NA
PLGRKT	483.798	-0.100765	0.367484	-0.274202	0.783929	0.999956
EPB41L2	945.958	1.2923	0.619192	2.08708	0.0368808	0.600502
ADGRG6	488.782	0.0527535	0.313574	0.168233	0.8664	0.999956
FOXB1	0.329999	0.0634756	4.08047	0.015556	0.987589	NA
ENSSSCG00000005216	0.833092	-0.589892	2.46904	-0.238915	0.811171	NA
BNIP2	1000.51	-0.00666888	0.380347	-0.0175337	0.986011	0.999956
ENSSSCG00000004583	441.735	0.113847	0.313399	0.363265	0.716407	0.999956
INSL6	10.3451	0.686512	1.20957	0.567566	0.57033	0.999956
VTA1	945.768	-0.0562323	0.251118	-0.223928	0.822814	0.999956
JAK2	888.2	0.218695	0.467094	0.468203	0.639639	0.999956
GCNT3	47.2155	-0.491048	0.697417	-0.704096	0.481373	0.999956
FAM81A	52.0341	0.662758	0.522101	1.2694	0.204297	0.999956
MYO1E	2729.2	-0.157986	0.339529	-0.465309	0.64171	0.999956
IFNGR1	1778.87	-0.125586	0.39115	-0.321069	0.748158	0.999956
IL22RA2	23.8511	-3.31573	1.36289	-2.43287	0.0149796	0.43061
ENSSSCG00000052472	0.67059	-1.45188	3.06417	-0.473824	0.635625	NA
CCNB2	171.096	0.00376937	0.486233	0.00775219	0.993815	0.999956
RCL1	400.699	0.0482898	0.26923	0.179363	0.857653	0.999956
IL20RA	3248.12	-1.07562	0.590557	-1.82136	0.0685516	0.732413
SLC35D3	10.3417	-2.17319	0.93225	-2.33113	0.0197467	0.478994
AK3	1823.92	0.142905	0.536961	0.266137	0.790134	0.999956
PEX7	315.71	-0.450725	0.415448	-1.08491	0.27796	0.999956
TCF4	162.987	0.345143	0.560425	0.615859	0.537987	0.999956
CDC37L1	663.497	0.177509	0.257546	0.689231	0.490678	0.999956
MAP3K5	721.648	-0.27584	0.39435	-0.69948	0.484252	0.999956
HEY2	28.0919	0.660874	0.695997	0.949536	0.342348	0.999956
ENSSSCG00000052990	0.165936	1.02525	4.08047	0.251257	0.801615	NA
ENSSSCG00000044946	3.67737	1.14978	1.17359	0.979713	0.327228	0.999956
ENSSSCG00000046709	0.68201	-2.85048	3.73905	-0.762353	0.445849	NA
ENSSSCG00000046403	0.177356	-0.898305	4.08047	-0.220147	0.825756	NA
ENSSSCG00000057474	171.346	-0.139679	0.286625	-0.487322	0.62603	0.999956
STX7	349.435	-0.219717	0.393937	-0.557746	0.577018	0.999956
PLPP6	102.871	-0.157487	0.344401	-0.457278	0.647471	0.999956
MAP7	1081.45	-0.525874	0.394542	-1.33287	0.182574	0.99527
ENSSSCG00000042982	7.39162	-0.0170946	0.860188	-0.0198731	0.984145	0.999956
ENSSSCG00000057706	1.31074	0.755509	1.89444	0.398804	0.690037	NA
ENSSSCG00000061106	1.97685	-0.485711	1.7153	-0.283163	0.777052	NA
ENSSSCG00000052809	0.331871	1.88552	4.04112	0.466585	0.640797	NA
ENSSSCG00000061367	4.17329	-0.545532	1.11191	-0.490626	0.623691	0.999956
ENSSSCG00000056124	15.8743	0.212535	0.770905	0.275696	0.782782	0.999956
ENSSSCG00000057368	1.00527	0.0598212	2.38091	0.0251254	0.979955	NA
ENSSSCG00000051776	0.497807	2.46879	3.99695	0.617667	0.536795	NA
ENSSSCG00000043234	1.35044	-0.641517	1.85407	-0.346005	0.729339	NA
ENSSSCG00000054958	0.476509	-0.785829	3.36533	-0.233507	0.815368	NA
ENSSSCG00000042244	0.177356	-0.898305	4.08047	-0.220147	0.825756	NA
ENSSSCG00000060676	1.60607	0.679983	2.1383	0.318001	0.750484	NA
ENSSSCG00000057292	0.818661	-3.1181	2.73767	-1.13896	0.25472	NA
MOXD1	640.625	0.113203	0.838969	0.134931	0.892666	0.999956
ENSSSCG00000056901	0.348701	0.0634756	4.08047	0.015556	0.987589	NA
ENSSSCG00000053418	9.82891	-0.0495682	0.808244	-0.0613284	0.951098	0.999956
ENSSSCG00000062478	1.17568	1.37824	2.32115	0.593775	0.552663	NA
ENSSSCG00000053718	21.8008	0.937262	0.608921	1.53922	0.123751	0.890344
ENSSSCG00000061171	2.91953	-0.22495	1.31935	-0.170501	0.864616	NA
ENSSSCG00000058961	8.43838	1.53103	1.24923	1.22558	0.220357	0.999956
ENSSSCG00000047862	0.343291	0.0634756	4.08047	0.015556	0.987589	NA
ENSSSCG00000061136	15.874	0.526914	0.650538	0.809965	0.41796	0.999956
CCN2	1364.71	1.07884	0.718584	1.50133	0.133269	0.907778
ENSSSCG00000062003	0.164063	-0.898305	4.08047	-0.220147	0.825756	NA
ENSSSCG00000055809	0.177356	-0.898305	4.08047	-0.220147	0.825756	NA
ENSSSCG00000061837	0.615766	-1.30566	3.94052	-0.331342	0.740386	NA
TMEM200A	17.2127	1.26706	0.797282	1.58922	0.11201	0.860156
Metazoa_SRP	0.327299	-1.79528	4.03788	-0.444611	0.656601	NA
TMEM260	666.389	-0.147669	0.337009	-0.438176	0.661259	0.999956
TXNL1	2243.71	0.0932042	0.341786	0.272698	0.785086	0.999956
PTPRK	1603.25	-0.178331	0.335321	-0.53182	0.59485	0.999956
ENSSSCG00000019937	5.52374	-1.14669	1.07383	-1.06785	0.28559	0.999956
ssc-mir-9823	0.164063	-0.898305	4.08047	-0.220147	0.825756	NA
ENSSSCG00000057314	90.1177	-0.448113	0.392502	-1.14168	0.253586	0.999956
ENSSSCG00000058562	135.858	0.00701764	0.404731	0.017339	0.986166	0.999956
HIF1A	2695.51	0.153046	0.353255	0.433245	0.664837	0.999956
WDR7	582.675	0.208803	0.355733	0.586965	0.557227	0.999956
SNAPC1	89.9324	0.190065	0.566635	0.335427	0.737303	0.999956
SYT16	1.9192	0.864215	1.96132	0.440628	0.659482	NA
ENSSSCG00000041512	78.7963	0.0981781	0.408638	0.240257	0.810131	0.999956
FECH	779.337	-0.275116	0.247493	-1.11161	0.266304	0.999956
ENSSSCG00000037043	2.04516	1.79149	2.35434	0.760928	0.4467	NA
ISG20	31.3008	-0.632685	0.661337	-0.956676	0.338731	0.999956
ENSSSCG00000033063	0.177356	-0.898305	4.08047	-0.220147	0.825756	NA
ENSSSCG00000047303	6.27641	0.347936	0.90822	0.383096	0.701648	0.999956
SAMD4A	928.209	1.99441	0.590101	3.37977	0.000725458	0.119464
THEMIS	1.44511	-2.80906	2.04762	-1.37187	0.170105	NA
NARS1	2440.46	0.222745	0.281934	0.790061	0.429492	0.999956
GCH1	128.438	0.788059	0.385972	2.04175	0.041176	0.616507
AEN	882.518	-0.185948	0.308998	-0.601778	0.547322	0.999956
ENSSSCG00000004213	99.6729	-0.179279	0.550167	-0.325864	0.744527	0.999956
MTFMT	183.57	0.214354	0.342068	0.62664	0.530895	0.999956
OTX2	0.354711	-1.89772	4.02903	-0.471013	0.637632	NA
SPG21	1741.64	-0.274414	0.305853	-0.89721	0.369607	0.999956
ENSSSCG00000038602	14.3804	-0.169829	1.30534	-0.130103	0.896485	0.999956
EXOC5	1632.41	0.302569	0.440516	0.68685	0.492177	0.999956
ANKDD1A	5.19564	-0.0266231	1.22659	-0.021705	0.982683	0.999956
KIAA0408	87.5434	0.500831	0.650503	0.769914	0.441351	0.999956
ENSSSCG00000037998	5.65736	2.2438	1.28293	1.74896	0.0802972	0.780941
ECHDC1	9857.79	-2.7566	1.02595	-2.68687	0.00721249	0.327996
ENSSSCG00000004547	374.115	1.16881	0.600307	1.94702	0.0515324	0.664194
RNF146	1071.08	0.0755004	0.232162	0.325205	0.745026	0.999956
BCLAF1	3348.58	-0.0841928	0.382748	-0.219969	0.825895	0.999956
RSPO3	112.964	2.14483	0.844081	2.54103	0.0110528	0.391276
ENSSSCG00000057184	77.8294	-0.0369447	0.464683	-0.0795052	0.936631	0.999956
TRMT11	168.058	-0.18	0.376478	-0.478114	0.632569	0.999956
HINT3	442.84	-0.261728	0.331565	-0.789372	0.429895	0.999956
PIF1	23.729	0.58897	0.576529	1.02158	0.30698	0.999956
NCOA7	662.874	-0.347411	0.645984	-0.537801	0.590715	0.999956
MTFR2	37.5612	0.384362	0.667397	0.575912	0.564675	0.999956
RBPMS2	90.5036	0.583844	0.738198	0.790905	0.428999	0.999956
PDE7B	144.824	1.45486	0.678747	2.14345	0.0320768	0.573859
OAZ2	2134.25	0.252678	0.335551	0.753026	0.451434	0.999956
ZNF609	1126.82	-0.158933	0.323332	-0.491548	0.623039	0.999956
SAMD3	3.91879	0.117438	1.3137	0.0893947	0.928768	0.999956
TRIP4	457.212	-0.00584225	0.266484	-0.0219235	0.982509	0.999956
AHI1	269.233	0.414502	0.388461	1.06703	0.285956	0.999956
PCLAF	296.967	0.239768	0.569116	0.421299	0.673537	0.999956
L3MBTL3	412.849	0.117281	0.242584	0.483465	0.628766	0.999956
CSNK1G1	586.028	-0.0887889	0.339495	-0.261532	0.793682	0.999956
TMEM244	0.497084	0.977817	3.33572	0.293135	0.769419	NA
ARHGAP18	677.398	0.345297	0.257942	1.33866	0.180681	0.992439
PPIB	1290.54	0.239919	0.340411	0.704793	0.480939	0.999956
ENSSSCG00000043584	0.717977	1.64624	3.79426	0.433876	0.664378	NA
ENSSSCG00000004170	93.417	0.164532	0.455016	0.361596	0.717654	0.999956
ENSSSCG00000062397	563.255	0.0918846	0.318811	0.28821	0.773186	0.999956
SNX22	61.6675	-0.542274	0.819718	-0.661537	0.508268	0.999956
ENSSSCG00000062051	0.80568	-0.528699	2.47651	-0.213485	0.830949	NA
ENSSSCG00000057824	1.17839	0.537019	2.21011	0.242983	0.808018	NA
ENSSSCG00000004207	909.136	1.25799	0.581491	2.16339	0.030511	0.567427
ENSSSCG00000062411	6.39694	0.0564693	0.977718	0.0577562	0.953943	0.999956
ENSSSCG00000054762	309.961	1.0654	0.421848	2.52554	0.0115519	0.396409
ENSSSCG00000052089	58.584	0.235326	0.474057	0.496408	0.619606	0.999956
ENSSSCG00000062566	0.184638	1.02525	4.08047	0.251257	0.801615	NA
ENSSSCG00000043315	3.14029	1.18857	1.45311	0.817952	0.413385	NA
ENSSSCG00000042703	1925.73	0.0385822	0.277963	0.138804	0.889605	0.999956
ENSSSCG00000060727	2.69743	1.64268	1.43809	1.14227	0.253344	NA
ENSSSCG00000062594	0.505793	0.914535	3.3097	0.27632	0.782303	NA
ENSSSCG00000056436	3.90839	0.336131	1.17643	0.285721	0.775092	0.999956
ENSSSCG00000053034	0.985314	3.4541	3.26195	1.05891	0.289643	NA
ENSSSCG00000063525	0.640572	-1.38697	3.08971	-0.448901	0.653503	NA
ENSSSCG00000052043	0.954579	-2.11536	2.75254	-0.768509	0.442185	NA
ENSSSCG00000053390	4.32436	1.19538	1.11409	1.07296	0.283287	0.999956
ENSSSCG00000063202	0.477242	-2.34352	3.99691	-0.586333	0.557652	NA
ENSSSCG00000033894	129.906	0.455861	0.892015	0.511046	0.609319	0.999956
ENSSSCG00000043068	0.629886	-1.35062	3.09693	-0.436117	0.662752	NA
ENSSSCG00000059813	0.165936	1.02525	4.08047	0.251257	0.801615	NA
ENSSSCG00000062947	0.350573	1.95382	4.03501	0.484217	0.628232	NA
ENSSSCG00000047685	0.833226	-0.368688	2.91628	-0.126424	0.899396	NA
ENSSSCG00000060593	0.149943	-0.898305	4.08047	-0.220147	0.825756	NA
AP5M1	527.733	0.0619389	0.377801	0.163946	0.869774	0.999956
ENSSSCG00000052868	0.164063	-0.898305	4.08047	-0.220147	0.825756	NA
ENSSSCG00000055584	0.177356	-0.898305	4.08047	-0.220147	0.825756	NA
ENSSSCG00000059090	1.16881	1.37086	1.95844	0.699975	0.483943	NA
ENSSSCG00000055062	0.546631	1.05804	4.02936	0.262581	0.792873	NA
ENSSSCG00000042590	0.369276	2.01981	4.02936	0.501272	0.616179	NA
ENSSSCG00000059141	20.6834	0.108736	0.577388	0.188323	0.850623	0.999956
ENSSSCG00000059897	22.3758	0.506217	0.519587	0.974268	0.329923	0.999956
ENSSSCG00000063357	0.328126	-1.7996	4.03749	-0.445723	0.655797	NA
ENSSSCG00000052966	1.17037	0.471843	1.77285	0.26615	0.790124	NA
ENSSSCG00000061365	1.67959	4.22196	2.17129	1.94445	0.0518411	NA
ENSSSCG00000057690	0.492501	0.914364	3.3344	0.274222	0.783914	NA
ENSSSCG00000054580	0.47807	-2.34636	3.99673	-0.587069	0.557157	NA
ENSSSCG00000062099	0.341419	-1.84928	4.03314	-0.458522	0.646578	NA
ENSSSCG00000061558	3.04458	-0.929986	1.38618	-0.670898	0.502285	NA
ENSSSCG00000058113	4.55773	-0.0622514	1.18353	-0.0525981	0.958052	0.999956
ENSSSCG00000061985	0.49094	2.45061	3.99808	0.612946	0.539912	NA
NAA30	886.047	0.19057	0.357985	0.532342	0.594489	0.999956
ENSSSCG00000056139	152.202	0.289196	0.824175	0.350892	0.72567	0.999956
ENSSSCG00000050757	19.7347	-1.27109	1.12945	-1.12541	0.260417	0.999956
CCDC198	0.149943	-0.898305	4.08047	-0.220147	0.825756	NA
ENSSSCG00000042942	0.500517	0.989565	3.33117	0.297062	0.766419	NA
ENSSSCG00000059697	0.162502	1.02525	4.08047	0.251257	0.801615	NA
ENSSSCG00000062659	0.164063	-0.898305	4.08047	-0.220147	0.825756	NA
ENSSSCG00000062201	1.37631	2.77055	2.55877	1.08277	0.278911	NA
ENSSSCG00000060884	15.9181	0.700527	0.795058	0.881102	0.378263	0.999956
ENSSSCG00000061752	55.4952	-0.0164831	0.580323	-0.0284034	0.97734	0.999956
ENSSSCG00000052476	1.76369	-1.34753	1.7187	-0.784042	0.433016	NA
ENSSSCG00000052032	0.162502	1.02525	4.08047	0.251257	0.801615	NA
ENSSSCG00000056433	26.1822	1.75542	0.896344	1.95842	0.0501804	0.661103
ENSSSCG00000057631	0.162502	1.02525	4.08047	0.251257	0.801615	NA
ENSSSCG00000052935	1.54693	1.93545	1.87217	1.0338	0.30123	NA
ENSSSCG00000052386	0.184638	1.02525	4.08047	0.251257	0.801615	NA
SLC35F4	0.667984	-1.45478	3.06794	-0.47419	0.635365	NA
CIAO2A	363.636	-0.0211346	0.239768	-0.0881463	0.92976	0.999956
ENSSSCG00000062236	0.162502	1.02525	4.08047	0.251257	0.801615	NA
ENSSSCG00000054811	0.165936	1.02525	4.08047	0.251257	0.801615	NA
ENSSSCG00000053164	0.149943	-0.898305	4.08047	-0.220147	0.825756	NA
ENSSSCG00000063232	0.184638	1.02525	4.08047	0.251257	0.801615	NA
ENSSSCG00000058558	0.348701	0.0634756	4.08047	0.015556	0.987589	NA
ENSSSCG00000060280	20.3169	0.835036	0.957758	0.871865	0.383282	0.999956
DAAM1	2045.18	-0.143011	0.374123	-0.382257	0.702271	0.999956
ENSSSCG00000059612	0.361993	0.0634756	4.08047	0.015556	0.987589	NA
ENSSSCG00000052570	2.42701	1.0744	1.85997	0.577645	0.563504	NA
ENSSSCG00000060378	1.81781	-0.193589	1.74018	-0.111246	0.911421	NA
HBS1L	962.047	0.0378944	0.255578	0.14827	0.88213	0.999956
ENSSSCG00000059265	0.648588	-1.35084	3.07216	-0.439703	0.660152	NA
DAPK2	167.099	-0.986092	0.524429	-1.88032	0.0600651	0.705714
ENSSSCG00000058128	0.184638	1.02525	4.08047	0.251257	0.801615	NA
ENSSSCG00000050451	11.0291	0.516106	0.806809	0.639687	0.522376	0.999956
ENSSSCG00000063217	0.149943	-0.898305	4.08047	-0.220147	0.825756	NA
ENSSSCG00000055354	260.847	0.447292	0.356522	1.2546	0.209625	0.999956
ENSSSCG00000044767	13.1976	-0.27493	0.729668	-0.376788	0.706331	0.999956
L3HYPDH	81.5707	-0.559372	0.431862	-1.29526	0.195232	0.999956
ENSSSCG00000058967	0.627186	-2.7389	3.81894	-0.71719	0.473257	NA
ENSSSCG00000058521	6.54461	0.0667024	1.13877	0.0585741	0.953291	0.999956
JKAMP	382.225	-0.150365	0.292963	-0.513256	0.607772	0.999956
ENSSSCG00000018450	8.44899	1.08917	0.88183	1.23513	0.216784	0.999956
ENSSSCG00000018972	29.7285	0.219888	0.667825	0.329261	0.741959	0.999956
HERC1	1280.78	-0.248529	0.346461	-0.717335	0.473167	0.999956
ENSSSCG00000018352	6.83218	0.0982034	0.95932	0.102368	0.918465	0.999956
FBXL22	10.6863	-0.111353	0.911046	-0.122225	0.902721	0.999956
CCDC175	1.2639	0.0797445	2.66883	0.02988	0.976163	NA
RTN1	36.745	0.946753	0.858216	1.10316	0.269956	0.999956
USP3	804.942	0.0729404	0.361969	0.20151	0.8403	0.999956
ENSSSCG00000038358	0.299887	-1.68717	4.0479	-0.416801	0.676824	NA
WDHD1	195.755	-0.0296531	0.364294	-0.0813988	0.935125	0.999956
ALDH1A3	308.163	-0.930738	0.566263	-1.64365	0.100248	0.826477
SOCS4	627.494	0.0795191	0.390405	0.203684	0.838601	0.999956
CHSY1	509.263	0.00430797	0.417157	0.010327	0.99176	0.999956
PLA2G4D	704.805	0.739434	0.723089	1.02261	0.306494	0.999956
PLA2G4E	2513.6	-0.015143	0.53623	-0.0282397	0.977471	0.999956
MAPK1IP1L	1313.13	0.0596784	0.368122	0.162116	0.871214	0.999956
MEIS2	262.394	-0.0378254	0.369054	-0.102493	0.918365	0.999956
PLA2G4F	2454.07	-0.324703	0.695597	-0.466798	0.640644	0.999956
LGALS3	10499.4	-0.11523	0.397604	-0.28981	0.771962	0.999956
ENSSSCG00000053306	154.968	0.211007	0.339857	0.62087	0.534685	0.999956
CCDC9B	465.213	0.78749	0.571549	1.37782	0.16826	0.976506
DLGAP5	260.827	0.311963	0.560813	0.556269	0.578027	0.999956
PLCB2	187.641	-0.558179	0.481689	-1.1588	0.246539	0.999956
FBXO34	122.881	0.282537	0.404187	0.699026	0.484536	0.999956
ENSSSCG00000040895	74.5041	-0.171809	0.335941	-0.511426	0.609053	0.999956
ENSSSCG00000059505	0.967044	-2.1342	2.74782	-0.776688	0.437343	NA
ATG14	145.361	-0.0878341	0.507414	-0.173101	0.862572	0.999956
APH1B	197.264	1.1673	0.687799	1.69716	0.0896671	0.805327
PAK6	996.69	-0.453368	0.485255	-0.934289	0.350155	0.999956
BUB1B	306.612	-0.151659	0.532401	-0.284859	0.775752	0.999956
CA12	2434.32	-0.251406	0.476289	-0.527842	0.597609	0.999956
KTN1	3376.74	0.14037	0.343858	0.408222	0.683111	0.999956
ENSSSCG00000043097	0.177356	-0.898305	4.08047	-0.220147	0.825756	NA
TMCO5A	0.348701	0.0634756	4.08047	0.015556	0.987589	NA
RAB8B	1136.72	0.30364	0.229045	1.32568	0.184946	0.999956
TYRO3	2967.4	-0.412739	0.560405	-0.736501	0.461426	0.999956
GABRG3	2.20197	-0.331199	2.47317	-0.133917	0.893468	NA
RPS27L	739.753	-0.149944	0.304759	-0.492007	0.622714	0.999956
GABRA5	19.4223	-2.05561	1.36434	-1.50667	0.131894	0.905311
MYEF2	31.7749	0.192906	0.722942	0.266834	0.789597	0.999956
LACTB	221.239	-0.0639942	0.392596	-0.163002	0.870517	0.999956
GABRB3	0.299887	-1.68717	4.0479	-0.416801	0.676824	NA
TPM1	2945.8	1.15491	0.63069	1.83118	0.0670739	0.727361
SCG5	7.64316	0.00641771	0.979709	0.00655063	0.994773	0.999956
LINS1	269.107	0.0288956	0.272912	0.105879	0.915679	0.999956
PELI2	22.7059	0.501596	0.717409	0.699178	0.484441	0.999956
ASB7	247.85	0.0515978	0.398402	0.129512	0.896953	0.999956
ARMH4	36.5044	0.989784	0.672962	1.47079	0.141349	0.92652
ENSSSCG00000004839	5.5074	-2.42834	1.17157	-2.07273	0.0381971	0.600769
ENSSSCG00000049460	2.21739	0.683795	1.62892	0.419784	0.674643	NA
ACTR10	1478.56	-0.0779076	0.274728	-0.283581	0.776731	0.999956
CERS3	1825.56	0.120751	0.577094	0.209239	0.834261	0.999956
SELENOS	934.517	-0.152489	0.382384	-0.398785	0.690052	0.999956
ENSSSCG00000055131	20.4612	1.25827	0.907793	1.38607	0.165725	0.974507
PSMA3	1851.31	-0.0604185	0.285382	-0.211711	0.832332	0.999956
MKRN3	0.822088	1.93911	2.91248	0.665793	0.505543	NA
LRRK1	504.383	0.0543619	0.251791	0.215901	0.829065	0.999956
ENSSSCG00000004811	0.369276	2.01981	4.02936	0.501272	0.616179	NA
ARID4A	509.323	-0.101107	0.384122	-0.263215	0.792385	0.999956
IGF1R	1015.15	-0.198013	0.39487	-0.501463	0.616045	0.999956
SLC24A5	9.6287	0.879509	0.781117	1.12596	0.260181	0.999956
ENSSSCG00000041479	1.7297	1.36212	1.84358	0.738847	0.46	NA
SEMA6D	304.547	-0.144699	0.474487	-0.304958	0.760398	0.999956
TOMM20L	4.20866	-0.387604	1.1682	-0.331796	0.740044	0.999956
TLN2	484.714	1.23813	0.659214	1.87818	0.060356	0.705714
CDIN1	149.041	0.194642	0.30645	0.635151	0.52533	0.999956
ENSSSCG00000027270	169.123	0.298704	0.304829	0.979906	0.327133	0.999956
EHD4	899.943	0.358706	0.505615	0.709446	0.478048	0.999956
KIAA0586	227.064	0.0466726	0.318822	0.146391	0.883613	0.999956
SPTBN5	15.4497	-0.137575	0.717916	-0.191631	0.848032	0.999956
ENSSSCG00000061849	0.149943	-0.898305	4.08047	-0.220147	0.825756	NA
ENSSSCG00000057228	0.361993	0.0634756	4.08047	0.015556	0.987589	NA
ENSSSCG00000043519	9.7513	0.216941	0.786106	0.275969	0.782572	0.999956
ENSSSCG00000004572	25.4279	-0.553987	1.18797	-0.466329	0.64098	0.999956
ENSSSCG00000004573	26.6424	-0.448578	0.855111	-0.524584	0.599872	0.999956
ENSSSCG00000004830	245.956	0.346834	0.52734	0.657705	0.510727	0.999956
VPS13C	494.274	0.342993	0.292384	1.17309	0.24076	0.999956
DACT1	209.277	1.82067	0.655717	2.77661	0.00549298	0.293374
ENSSSCG00000036551	8.68443	3.28339	1.64607	1.99468	0.0460779	0.641846
ENSSSCG00000054906	4.59947	-0.726105	1.17674	-0.61705	0.537202	0.999956
PLA2G4B	2310.73	-0.0783262	0.602502	-0.130002	0.896565	0.999956
ENSSSCG00000005103	212.435	-0.251955	0.339408	-0.742335	0.457884	0.999956
UBE3A	1568.15	0.234963	0.269214	0.872774	0.382786	0.999956
MRPS11	379.541	0.31489	0.386327	0.815087	0.415023	0.999956
ENSSSCG00000057430	123.969	-0.313293	0.467327	-0.670393	0.502607	0.999956
MRPL46	342.906	-0.00584055	0.288385	-0.0202526	0.983842	0.999956
MAPKBP1	1088.81	-0.404117	0.41643	-0.970433	0.331831	0.999956
NTRK3	64.5364	-0.640277	0.91737	-0.697949	0.485209	0.999956
OTUD7A	63.5749	-0.291126	0.451001	-0.645511	0.518596	0.999956
KLF13	5599.93	-0.282419	0.477597	-0.591334	0.554297	0.999956
ENSSSCG00000035223	159.353	1.17612	1.19945	0.980553	NA	NA
FAM163B	1.24149	-3.71517	3.94185	-0.942493	0.34594	NA
ENSSSCG00000005683	509.898	0.0618527	0.242928	0.254614	0.799022	0.999956
MGA	561.884	-0.0727615	0.433511	-0.167842	0.866707	0.999956
TTC23	30.8648	0.356367	0.566094	0.629519	0.529009	0.999956
BRD3	1456.38	-0.408759	0.357296	-1.14404	0.252609	0.999956
ENSSSCG00000063327	0.800404	-0.389676	2.98262	-0.130649	0.896053	NA
ESR2	6.16334	-2.09003	1.13248	-1.84553	0.0649608	0.72032
ENSSSCG00000056777	155.018	0.10914	0.302281	0.361056	0.718057	0.999956
ENSSSCG00000056368	1.23519	0.472054	2.25715	0.209137	0.834341	NA
NTNG2	10.1446	0.38721	0.875395	0.442326	0.658253	0.999956
RPAP1	521.533	-0.0821819	0.269202	-0.305279	0.760153	0.999956
SETX	1223.02	-0.228012	0.238686	-0.95528	0.339436	0.999956
MEF2A	1770.01	-0.20036	0.35677	-0.561593	0.574393	0.999956
ENSSSCG00000005725	362.251	-0.16134	0.272321	-0.592463	0.553541	0.999956
BMF	463.024	-0.475597	0.347685	-1.3679	0.171345	0.981234
CFAP77	0.312446	0.0634756	4.08047	0.015556	0.987589	NA
SRP14	523.873	-0.0950228	0.257929	-0.368407	0.71257	0.999956
ENSSSCG00000055870	1.00974	1.06272	2.37726	0.447037	0.654848	NA
SYNE2	3934.2	-0.0811161	0.340983	-0.237889	0.811967	0.999956
ENSSSCG00000059580	1.5962	-1.15663	1.77022	-0.653382	0.51351	NA
ENSSSCG00000059979	2.77583	-0.0525439	1.51098	-0.0347746	0.972259	NA
ENSSSCG00000054682	0.164063	-0.898305	4.08047	-0.220147	0.825756	NA
TOR1A	350.041	0.166042	0.265456	0.625497	0.531645	0.999956
ENSSSCG00000055844	603.317	0.411685	0.512158	0.803824	0.421499	0.999956
LYSMD4	352.832	-0.0360119	0.376986	-0.0955257	0.923897	0.999956
MYMK	2.76228	3.87508	2.90096	1.3358	0.181616	NA
ENSSSCG00000059577	0.184638	1.02525	4.08047	0.251257	0.801615	NA
EIF2AK4	841.055	-0.20539	0.38092	-0.539195	0.589753	0.999956
ENSSSCG00000057874	220.149	-0.0204086	0.355694	-0.0573769	0.954245	0.999956
ENSSSCG00000051803	7.86125	-0.130134	1.03536	-0.125689	0.899978	0.999956
ENSSSCG00000058109	2.20492	0.699375	1.56123	0.447963	0.65418	NA
ENSSSCG00000051882	0.474948	0.897625	4.04353	0.22199	0.824322	NA
ADAMTS17	56.3112	-0.255084	0.65282	-0.390742	0.695988	0.999956
BARHL1	0.149943	-0.898305	4.08047	-0.220147	0.825756	NA
ENSSSCG00000059248	4.83709	-0.346086	1.18047	-0.293177	0.769387	0.999956
ENSSSCG00000059569	0.184638	1.02525	4.08047	0.251257	0.801615	NA
ENSSSCG00000055636	14.2381	0.929576	0.781098	1.19009	0.234011	0.999956
ENSSSCG00000062745	0.703857	1.64638	3.81728	0.431296	0.666253	NA
DDX31	267.895	-0.0856395	0.301493	-0.284052	0.776371	0.999956
ENSSSCG00000056799	0.478381	0.91418	3.36171	0.271939	0.785669	NA
GREM1	590.367	1.23855	0.726094	1.70577	0.0880505	0.802871
GTF3C4	532.419	0.00459411	0.303708	0.0151267	0.987931	0.999956
FMN1	174.248	-0.569731	0.538966	-1.05708	0.290474	0.999956
ENSSSCG00000061963	2.79898	-0.816987	1.29542	-0.630675	0.528253	NA
ENSSSCG00000059422	0.149943	-0.898305	4.08047	-0.220147	0.825756	NA
ENSSSCG00000055290	129.892	0.654047	0.503469	1.29908	0.193916	0.999956
ENSSSCG00000044554	0.341419	-1.84928	4.03314	-0.458522	0.646578	NA
RAPGEF1	1657.26	-0.0962056	0.329341	-0.292115	0.770199	0.999956
ENSSSCG00000027232	1.60151	-1.87116	2.15246	-0.869314	0.384675	NA
GPR176	139.858	0.282212	0.44986	0.627333	0.530441	0.999956
DPH6	396.223	-0.0567048	0.459769	-0.123333	0.901843	0.999956
MED27	293.493	-0.202957	0.380537	-0.533344	0.593796	0.999956
ENSSSCG00000004786	1.21264	-0.415483	2.26132	-0.183735	0.854221	NA
ENSSSCG00000057289	0.974316	1.06331	2.38399	0.446021	0.655582	NA
FSIP1	1.24434	2.59274	2.26037	1.14704	0.251364	NA
ENSSSCG00000059601	1.47284	-0.980073	2.08903	-0.469153	0.638961	NA
LRRC9	4.20155	-0.784803	1.25949	-0.623112	0.533211	0.999956
AQR	476.337	-0.0387965	0.405868	-0.0955889	0.923847	0.999956
THBS1	2374.98	0.471229	0.518463	0.908896	0.363405	0.999956
PRRX2	351.608	2.48543	0.866018	2.86995	0.0041054	0.257963
PTGES	254.757	0.493537	0.650773	0.758386	0.44822	0.999956
ENSSSCG00000061897	0.34714	1.94125	4.03611	0.48097	0.630538	NA
DBH	4.0472	-1.00744	1.31287	-0.767358	0.442869	0.999956
PCNX4	295.155	0.148665	0.355757	0.417884	0.676032	0.999956
RASGRP1	2191.65	-0.708395	0.54067	-1.31022	0.190123	0.999956
SARDH	38.4322	-2.85156	1.05323	-2.70744	0.0067805	0.318915
DHRS7	1372.07	-0.0828604	0.297648	-0.278384	0.780718	0.999956
ZNF770	216.488	0.112944	0.305665	0.369504	0.711752	0.999956
FAM98B	387.556	0.111358	0.354521	0.314109	0.753438	0.999956
PPM1A	987.551	-0.00932961	0.260685	-0.0357889	0.971451	0.999956
VAV2	1147.62	0.126091	0.42557	0.296288	0.76701	0.999956
ACTC1	91.5246	7.53487	2.24966	3.34934	0.000810057	0.128919
SPRED1	1133.26	0.113881	0.3246	0.350836	0.725712	0.999956
TGM7	8.99807	-2.7075	1.43412	-1.88792	0.0590373	0.701271
C14orf39	1.07042	3.56465	3.22581	1.10504	0.269142	NA
TGM5	891.387	0.0746892	0.547868	0.136327	0.891563	0.999956
SCAI	23.0718	-0.245421	0.682013	-0.359847	0.718961	0.999956
SIX6	0.64775	1.50724	3.89129	0.387337	0.698507	NA
SIX1	102.11	3.18273	0.828157	3.84315	0.000121464	0.0442405
SIX4	26.1039	2.48554	1.30965	1.89787	0.0577133	0.693197
MNAT1	214.515	0.0317417	0.283426	0.111993	0.910829	0.999956
GJD2	0.164063	-0.898305	4.08047	-0.220147	0.825756	NA
PPP6C	1473.17	-0.0511107	0.28544	-0.179059	0.857891	0.999956
ENSSSCG00000004806	267.155	0.0151317	0.42981	0.0352054	0.971916	0.999956
TRMT5	300.146	0.00672994	0.33965	0.0198143	0.984191	0.999956
NDN	172.525	0.437347	0.546007	0.800992	0.423136	0.999956
RABEPK	205.763	-0.295908	0.29241	-1.01196	0.311555	0.999956
ENSSSCG00000057776	0.184638	1.02525	4.08047	0.251257	0.801615	NA
SLC38A6	171.367	0.276031	0.282568	0.976866	0.328635	0.999956
ENSSSCG00000050569	0.846518	-0.401493	2.91018	-0.137961	0.890271	NA
ENSSSCG00000032719	0.184638	1.02525	4.08047	0.251257	0.801615	NA
ENSSSCG00000030003	8.38329	0.00925672	0.943616	0.00980983	0.992173	0.999956
HSPA5	5889.26	0.667628	0.411477	1.62252	0.104693	0.840448
ENSSSCG00000054331	8.97145	0.544688	0.839347	0.648943	0.516375	0.999956
ENSSSCG00000055023	9.11601	-0.101581	0.741622	-0.136971	0.891053	0.999956
EPB42	14.9198	0.48296	0.684468	0.705599	0.480437	0.999956
ENSSSCG00000062007	0.655004	1.49317	3.06679	0.486885	0.62634	NA
ENSSSCG00000005095	1112.32	0.225643	0.267613	0.843168	0.399135	0.999956
ENSSSCG00000055632	0.162502	1.02525	4.08047	0.251257	0.801615	NA
ENSSSCG00000062543	0.184638	1.02525	4.08047	0.251257	0.801615	NA
ENSSSCG00000059867	0.315879	0.0634756	4.08047	0.015556	0.987589	NA
ENSSSCG00000054502	0.331871	1.88552	4.04112	0.466585	0.640797	NA
ENSSSCG00000057613	0.149943	-0.898305	4.08047	-0.220147	0.825756	NA
ENSSSCG00000057411	0.507354	-0.883484	3.32204	-0.265946	0.790281	NA
ENSSSCG00000056845	163.596	-0.30268	0.546743	-0.553605	0.579849	0.999956
ENSSSCG00000059729	950.089	0.708404	0.886707	0.798915	0.42434	0.999956
ENSSSCG00000044231	10.1762	-0.020479	0.753682	-0.027172	0.978323	0.999956
GAPVD1	1301.67	0.018506	0.401001	0.0461496	0.963191	0.999956
ENSSSCG00000049674	1.33857	-1.58325	1.91325	-0.827519	0.407943	NA
GPR135	1.37756	1.72921	2.20202	0.785282	0.432288	NA
ENSSSCG00000060230	13.0823	0.494967	0.626783	0.789694	0.429707	0.999956
ENSSSCG00000052653	2.07169	-0.492089	1.95887	-0.251211	0.801651	NA
ENSSSCG00000051349	1.36872	1.66819	2.18191	0.764556	0.444536	NA
ENSSSCG00000048650	0.533339	1.05804	4.02936	0.262581	0.792873	NA
ENSSSCG00000057237	0.184638	1.02525	4.08047	0.251257	0.801615	NA
ENSSSCG00000061900	228.321	-0.746436	0.531174	-1.40526	0.159945	0.963809
ENSSSCG00000058387	1.76312	0.629398	1.82872	0.344173	0.730716	NA
ENSSSCG00000060612	4.94305	0.228292	1.38846	0.164421	0.8694	0.999956
ENSSSCG00000052657	0.162502	1.02525	4.08047	0.251257	0.801615	NA
ENSSSCG00000058001	0.67329	-0.01826	3.10601	-0.00587893	0.995309	NA
ENSSSCG00000058801	9.60871	0.248238	1.00125	0.247929	0.804189	0.999956
ENSSSCG00000056778	89.7281	0.530454	0.725074	0.731586	0.464421	0.999956
ENSSSCG00000052302	0.184638	1.02525	4.08047	0.251257	0.801615	NA
ENSSSCG00000046956	0.177356	-0.898305	4.08047	-0.220147	0.825756	NA
ENSSSCG00000042837	10.2306	-0.147224	0.751833	-0.19582	0.844751	0.999956
CCNDBP1	627.29	0.206831	0.318731	0.64892	0.51639	0.999956
ENSSSCG00000051146	4.96527	0.631791	1.12872	0.559743	0.575655	0.999956
ENSSSCG00000056613	1.16964	1.36447	2.20307	0.619351	0.535685	NA
ENSSSCG00000061741	31.281	-0.365928	0.558973	-0.654644	0.512697	0.999956
ENSSSCG00000047955	0.505482	-2.41953	3.99233	-0.606045	0.544485	NA
ENSSSCG00000055676	0.348701	0.0634756	4.08047	0.015556	0.987589	NA
ENSSSCG00000057575	0.184638	1.02525	4.08047	0.251257	0.801615	NA
ENSSSCG00000052690	0.184638	1.02525	4.08047	0.251257	0.801615	NA
ENSSSCG00000051993	0.149943	-0.898305	4.08047	-0.220147	0.825756	NA
TMEM62	272.557	-0.272806	0.316658	-0.861516	0.388954	0.999956
ENSSSCG00000054949	1.54149	1.01062	1.80018	0.561399	0.574525	NA
ENSSSCG00000051867	0.640572	-1.38697	3.08971	-0.448901	0.653503	NA
ENSSSCG00000060976	253.192	-0.134437	0.306755	-0.438257	0.6612	0.999956
ENSSSCG00000053803	2.90946	-1.66774	1.4353	-1.16195	0.245255	NA
ENSSSCG00000057176	0.369276	2.01981	4.02936	0.501272	0.616179	NA
ENSSSCG00000057545	0.719849	2.99077	3.67758	0.813242	0.416079	NA
ENSSSCG00000059303	0.162502	1.02525	4.08047	0.251257	0.801615	NA
ENSSSCG00000060694	7.91672	-0.134531	0.841373	-0.159895	0.872964	0.999956
ENSSSCG00000053134	10.9329	0.4633	0.902617	0.513285	0.607752	0.999956
ENSSSCG00000062562	1.23519	0.472054	2.25715	0.209137	0.834341	NA
ENSSSCG00000062715	5.17786	-0.392634	0.969182	-0.405119	0.68539	0.999956
ENSSSCG00000053298	1.20393	-0.333377	1.94967	-0.170991	0.86423	NA
ENSSSCG00000046397	0.149943	-0.898305	4.08047	-0.220147	0.825756	NA
ENSSSCG00000026014	2.34873	0.0454922	1.30183	0.0349449	0.972124	NA
ENSSSCG00000061720	1.14367	-1.30397	2.21344	-0.589115	0.555784	NA
ENSSSCG00000055525	19.7243	-0.370044	0.575117	-0.643425	0.519949	0.999956
ENSSSCG00000062037	1.75258	0.3617	2.03515	0.177727	0.858937	NA
ENSSSCG00000059991	3.95367	-0.179197	1.08269	-0.16551	0.868542	0.999956
ENSSSCG00000057496	20.0255	-1.46499	1.10968	-1.32019	0.186771	0.999956
ENSSSCG00000043508	0.184638	1.02525	4.08047	0.251257	0.801615	NA
ENSSSCG00000051017	0.505793	0.914535	3.3097	0.27632	0.782303	NA
LRRC28	1052.06	0.256402	0.317809	0.806781	0.419792	0.999956
UBR1	762.274	-0.0017698	0.38986	-0.00453957	0.996378	0.999956
TTBK2	44.7416	0.554646	0.520449	1.06571	0.286556	0.999956
ENSSSCG00000061305	36.5991	-0.213589	0.47776	-0.447064	0.654829	0.999956
NTMT1	399.793	0.276802	0.310819	0.890557	0.373167	0.999956
CDAN1	372.176	0.156068	0.28016	0.557067	0.577481	0.999956
ENSSSCG00000022039	144.832	1.17121	0.609127	1.92277	0.0545093	0.679902
ASB6	448.034	-0.182536	0.324029	-0.563332	0.573209	0.999956
ENSSSCG00000044105	34.3108	1.22378	0.622849	1.96481	0.0494364	0.658428
ENSSSCG00000044127	8.82721	0.815577	0.783848	1.04048	0.298118	0.999956
ADAMTSL2	20.4013	0.0210813	0.801631	0.026298	0.97902	0.999956
C9orf78	765.469	-0.0369876	0.241526	-0.153141	0.878287	0.999956
HAUS2	198.949	-0.00534131	0.282968	-0.0188761	0.98494	0.999956
MAPKAP1	1243.61	-0.0922295	0.304533	-0.302856	0.762	0.999956
LRRC57	409.109	0.331972	0.284407	1.16724	0.243112	0.999956
SNAP23	822.947	0.123481	0.236173	0.522842	0.601084	0.999956
PBX3	234.902	0.32309	0.335066	0.96426	0.334915	0.999956
MVB12B	276.855	0.309252	0.588103	0.525846	0.598995	0.999956
LMX1B	9.52267	-0.570014	1.59052	-0.358383	0.720057	0.999956
ZBTB43	908.68	0.156026	0.417759	0.373482	0.70879	0.999956
ZBTB34	371.077	0.289823	0.342978	0.845019	0.3981	0.999956
RALGPS1	130.137	-0.608837	0.464592	-1.31048	0.190035	0.999956
ZNF106	1280.93	2.11719	0.78079	2.7116	0.006696	0.318915
CAPN3	162.176	3.50307	1.10319	3.17541	NA	NA
ANGPTL2	2583.93	1.36014	0.581855	2.33758	0.0194088	0.478994
ASS1	243.674	-0.0675965	0.763851	-0.0884943	0.929484	0.999956
FUBP3	950.656	-0.124253	0.379212	-0.32766	0.743169	0.999956
ENSSSCG00000004729	142.512	0.169655	0.589745	0.287675	0.773595	0.999956
TMEM87A	1371.11	-0.399576	0.381893	-1.0463	0.295421	0.999956
ENSSSCG00000033472	1.58821	-0.492761	2.06404	-0.238736	0.81131	NA
VPS39	1017.85	-0.0736794	0.304401	-0.242048	0.808743	0.999956
ENSSSCG00000004746	12.721	-0.684331	0.935147	-0.73179	0.464297	0.999956
AK8	65.1609	-0.854489	0.394375	-2.16669	0.0302584	0.567427
SPACA9	42.0217	-0.411517	0.674354	-0.610239	0.541703	0.999956
RTF1	1236.24	-0.0471833	0.270271	-0.174578	0.861412	0.999956
TSC1	1037.03	-0.0306568	0.260773	-0.117561	0.906415	0.999956
DUT	664.763	-0.0689223	0.294484	-0.234044	0.814951	0.999956
PRDM12	0.329999	0.0634756	4.08047	0.015556	0.987589	NA
SLC12A1	12.8629	-0.0885537	0.672372	-0.131703	0.895219	0.999956
EXOSC2	401.739	-0.152961	0.317637	-0.481561	0.630118	0.999956
BAHD1	741.434	-0.0435598	0.265478	-0.164081	0.869668	0.999956
GFI1B	0.961034	-0.849924	2.39025	-0.35558	0.722155	NA
NDUFAF1	374.162	0.140094	0.456129	0.307136	0.75874	0.999956
ENSSSCG00000035544	834.443	-0.0277642	0.40022	-0.0693724	0.944693	0.999956
ABL1	1967.68	0.173123	0.31354	0.552155	0.580842	0.999956
OIP5	376.702	0.298742	0.287156	1.04035	0.298178	0.999956
ENSSSCG00000032110	626.023	-0.15913	0.306396	-0.51936	0.60351	0.999956
FIBCD1	37.158	-1.96866	1.1908	-1.65323	0.0982832	0.82124
CHP1	4107.96	0.0511923	0.440275	0.116273	0.907436	0.999956
LAMC3	944.181	-0.711673	0.625902	-1.13704	0.255523	0.999956
EXD1	32.4065	-0.499005	0.51688	-0.965418	0.334336	0.999956
CEL	8.94392	-2.27585	0.895934	-2.5402	0.011079	0.391276
INO80	1003.7	-0.166866	0.291725	-0.571998	0.567323	0.999956
CHAC1	88.3617	0.534791	0.622324	0.859346	0.39015	0.999956
AIF1L	1137.28	-0.590938	0.53797	-1.09846	0.272004	0.999956
DLL4	185.786	0.992363	0.851724	1.16512	0.243969	0.999956
VPS18	490.085	-0.0851758	0.291583	-0.292115	0.770199	0.999956
RHOV	3515.25	-0.445454	0.535156	-0.832382	0.405193	0.999956
SPINT1	1505.79	-0.723798	0.40579	-1.78368	0.074476	0.763383
ENSSSCG00000004760	60.5561	-0.337533	0.485548	-0.69516	0.486955	0.999956
ENSSSCG00000005612	3.26105	-1.11619	1.38657	-0.805001	0.420819	NA
ENSSSCG00000005738	1715.72	0.342939	0.545281	0.628922	0.5294	0.999956
ZFYVE19	123.183	0.338615	0.537305	0.630211	0.528557	0.999956
DNAJC17	252.124	0.131717	0.27135	0.485413	0.627384	0.999956
NUP214	1372.85	-0.240558	0.268508	-0.895903	0.370304	0.999956
ENSSSCG00000061289	126.725	-0.0367254	0.667281	-0.0550373	0.956109	0.999956
RMDN3	175.278	-0.662443	0.505908	-1.30941	0.190395	0.999956
RAD51	129.995	-0.0859229	0.453868	-0.189313	0.849848	0.999956
ENSSSCG00000042522	193.949	0.148098	0.64817	0.228486	0.819268	0.999956
ENSSSCG00000036700	241.528	-0.0759083	0.416438	-0.18228	0.855363	0.999956
CCDC32	247.875	0.369103	0.472283	0.781529	0.434491	0.999956
ENSSSCG00000004771	136.002	0.164009	0.43617	0.376022	0.706901	0.999956
ENSSSCG00000004666	1236.07	0.368203	0.545358	0.675159	0.499575	0.999956
BLOC1S6	817.375	0.360314	0.329012	1.09514	0.273456	0.999956
SLC30A4	544.621	0.337519	0.364693	0.925488	0.354712	0.999956
GBGT1	383.277	0.102	0.344672	0.295933	0.767281	0.999956
[truncated: 22,717 more rows]

## Sheet: LDY vs LEY
Analysis of differentially expressed genes in LDY vs. LEY
gene	baseMean	log2FoldChange	lfcSE	stat	pvalue	padj
ALDH1A1	4903.57	0.184248	1.14654	0.160699	0.87233	0.955003
ANXA1	35620.3	2.62994	0.796266	3.30284	0.000957099	0.0226044
RORB	65.2034	2.68084	1.71775	1.56067	NA	NA
TRPM6	31.9729	0.876343	0.743018	1.17944	0.238224	0.544014
C9orf40	307.723	0.062326	0.276325	0.225553	0.821549	0.933471
CARNMT1	1037.13	-0.143111	0.335273	-0.42685	0.669489	0.859832
NMRK1	140.719	0.238936	0.521868	0.457849	0.647061	0.84658
OSTF1	1542.7	0.683356	0.529619	1.29028	0.196954	0.494399
PCSK5	179.666	0.283942	0.3872	0.733321	0.463363	0.735057
ENSSSCG00000057774	16.0134	0.427573	0.482136	0.886832	0.375169	0.669488
RFK	2509.67	0.573047	0.593059	0.966256	0.333916	0.634316
GCNT1	1208.22	0.0943947	0.681147	0.138582	0.889781	0.961018
ENSSSCG00000039009	888.08	1.87903	1.49426	1.2575	NA	NA
ENSSSCG00000060679	76.5709	1.77509	1.813	0.979092	NA	NA
ENSSSCG00000005279	3.09275	2.5632	2.3649	1.08385	0.278432	NA
VPS13A	836.447	-0.797977	0.345952	-2.30661	0.0210764	0.15208
GRIK2	44.1597	4.45756	1.43727	3.10142	0.00192598	0.0358508
FAXC	471.047	0.0257334	0.404073	0.063685	0.949221	0.981706
LMBRD1	844.35	-0.109849	0.339919	-0.323162	0.746572	0.900726
PNISR	1611.36	-0.296198	0.265605	-1.11518	0.264773	0.572301
COL19A1	5.78029	1.74276	1.19628	1.45682	0.145166	0.424252
ENSSSCG00000004261	1.30564	-0.340303	1.43594	-0.23699	0.812665	NA
ENSSSCG00000050732	0.42694	-2.01623	3.99614	-0.504544	0.613879	NA
USP45	298.896	0.13453	0.191834	0.701285	0.483125	0.749213
KPNA5	270.584	-0.656054	0.382983	-1.71301	0.0867106	0.32653
ENSSSCG00000038757	317.862	0.0302859	0.262066	0.115566	0.907997	0.967432
CCNC	986.679	0.206574	0.238212	0.867186	0.38584	0.6774
GNA14	761.342	2.19788	0.584263	3.76179	0.000168699	0.00680566
ENSSSCG00000050902	0.898317	2.26803	2.59561	0.873796	0.382229	NA
ZUP1	333.776	-0.291312	0.314948	-0.924954	0.35499	0.652721
ABHD17B	711.759	0.162279	0.404973	0.400716	0.688629	0.870818
C9orf85	192.291	-0.384044	0.352152	-1.09056	0.275465	0.582466
ENSSSCG00000004355	3.19519	-0.639946	2.18394	-0.293024	0.769504	NA
GDA	60.0068	-5.84341	1.83574	-3.18314	NA	NA
RSPH4A	367.675	-6.1166	1.46155	-4.18502	2.85142e-05	0.00190536
ENSSSCG00000032533	4.27664	-5.33836	3.18837	-1.67432	0.0940676	NA
ENSSSCG00000031854	1.47763	0.670514	1.53397	0.437111	0.662031	NA
PTP4A1	2823.58	-0.473478	0.433533	-1.09214	0.274772	0.581892
ZFAND5	4753.44	1.09303	0.295132	3.70354	0.000212614	0.00820436
KLHL32	65.635	-0.286596	1.06593	-0.26887	0.78803	0.919933
TMC1	19.0133	0.236737	1.16681	0.202893	0.839219	0.940848
ENSSSCG00000004246	87.5959	-0.588987	0.29932	-1.96775	0.0490966	0.241808
ASF1A	309.695	-0.190475	0.218282	-0.872609	0.382876	0.675352
CEP85L	343.67	0.452592	0.67379	0.671711	0.501768	0.75918
TLE4	784.701	0.766534	0.299162	2.56227	0.010399	0.102268
TXNDC16	130.534	1.37643	0.793606	1.73441	0.0828462	0.319615
ENSSSCG00000062089	865.553	1.78221	1.23418	1.44404	NA	NA
GPR137C	8.04192	1.82216	1.05068	1.73426	0.0828713	0.319638
GJA1	5918.39	2.75278	0.696866	3.95023	7.80775e-05	0.00389524
ERO1A	2880.77	1.57943	0.357602	4.41674	1.002e-05	0.000898766
TBC1D32	320.407	-0.346444	0.342532	-1.01142	0.311815	0.615851
ENSSSCG00000035799	0.284627	-1.43241	4.03998	-0.354559	0.72292	NA
TLE1	1565.64	0.91939	0.41398	2.22086	0.0263606	0.17294
PSMC6	1944.63	0.430895	0.275405	1.56458	0.11768	0.382507
FAM184A	27.449	-0.774262	1.42352	-0.543905	0.586507	0.812381
ENSSSCG00000033805	16.8081	1.85816	0.519818	3.57464	0.000350709	0.0116189
ENSSSCG00000037497	1.19441	0.0212722	1.66765	0.0127558	0.989823	NA
GNAQ	2000.05	0.553287	0.368133	1.50295	0.132851	0.405625
MMS22L	152.374	-0.474058	0.609903	-0.777268	0.437001	0.717139
CEP78	309.944	-0.203715	0.437037	-0.466127	0.641124	0.843511
COL9A1	1.41228	3.0008	2.58027	1.16298	0.244837	NA
STYX	526.554	0.229149	0.204481	1.12064	0.262443	0.569939
GNPNAT1	387.801	-0.0132438	0.232064	-0.0570697	0.95449	0.983464
SLC35F1	245.641	-3.32976	1.06036	-3.14023	0.00168814	0.0330245
PSAT1	2307.27	0.359143	0.774612	0.463642	0.642904	0.844273
FERMT2	3950.91	1.40055	1.00558	1.39277	NA	NA
NUS1	1285.89	-0.102216	0.374561	-0.272896	0.784933	0.918691
ENSSSCG00000058846	0.58506	-2.46611	2.58415	-0.954321	0.339921	NA
ENSSSCG00000004252	0.285956	-1.43824	4.03945	-0.356049	0.721804	NA
ENSSSCG00000004253	996.904	0.153866	0.199252	0.772216	0.439986	0.719387
ENSSSCG00000044537	0.215857	1.36248	4.08047	0.333902	0.738454	NA
ENSSSCG00000056780	0.177636	1.36248	4.08047	0.333902	0.738454	NA
ENSSSCG00000051979	0.142313	-0.561077	4.08047	-0.137503	0.890633	NA
ENSSSCG00000054867	0.215857	1.36248	4.08047	0.333902	0.738454	NA
ENSSSCG00000056863	0.291865	-1.4638	4.03716	-0.362581	0.716918	NA
ENSSSCG00000060009	83.5777	0.695336	0.458115	1.51782	0.12906	0.399864
ENSSSCG00000054181	9.83488	0.953556	0.94671	1.00723	0.313823	0.617453
ENSSSCG00000062298	6.39968	0.276523	0.981946	0.281607	0.778245	0.915876
ENSSSCG00000062781	0.730818	0.513553	3.9392	0.13037	0.896274	NA
ENSSSCG00000044318	12.4827	2.19134	1.8784	1.1666	0.243372	0.550058
ENSSSCG00000063502	1.03866	-2.05716	2.64588	-0.777496	0.436866	NA
HACE1	743.775	0.5793	0.321243	1.80331	0.0713396	0.296525
DDHD1	633.677	0.261483	0.34358	0.761053	0.446626	0.723856
ENSSSCG00000053831	0.355272	2.16432	4.04679	0.534824	0.592772	NA
ENSSSCG00000043786	0.177636	1.36248	4.08047	0.333902	0.738454	NA
DCBLD1	715.195	0.839249	0.469129	1.78895	0.0736226	0.301206
ENSSSCG00000061420	0.285956	-1.43824	4.03945	-0.356049	0.721804	NA
ROS1	0.142313	-0.561077	4.08047	-0.137503	0.890633	NA
BMP4	618.251	1.45019	0.696124	2.08323	0.0372303	0.207679
CDKN3	100.597	0.504643	0.626827	0.805076	0.420776	0.704832
ENSSSCG00000019939	1.04634	1.40122	1.73775	0.806343	0.420045	NA
BVES	340.101	2.59404	1.34558	1.92782	NA	NA
CNIH1	2010.3	0.463695	0.400888	1.15667	0.247407	0.553686
VGLL2	0.710544	3.15737	3.97776	0.793757	0.427337	NA
POPDC3	134.572	0.82066	0.828005	0.991129	0.321623	0.624255
RFX6	31.6301	-2.28236	1.04522	-2.18363	0.0289896	0.182068
PREP	937.663	0.0212317	0.220258	0.0963946	0.923207	0.971727
GMFB	1595.08	0.297633	0.452128	0.658294	0.510349	0.76532
ENSSSCG00000053030	1.56678	-3.89028	3.4137	-1.13961	0.254449	NA
MANEA	622.211	0.108274	0.306296	0.353496	0.723716	0.889786
FAM162B	257.32	-1.25431	0.807317	-1.55368	0.12026	0.386719
PHF3	2641.81	-0.232254	0.114279	-2.03234	0.0421191	0.22331
CGRRF1	381.106	0.222511	0.32144	0.692232	0.488792	0.752053
RPS29	3950.14	-0.0677663	0.287612	-0.235617	0.81373	0.930357
ENSSSCG00000042849	0.399305	2.30954	4.0336	0.572575	0.566932	NA
UFL1	1174.38	0.0647139	0.196318	0.329638	0.741674	0.898532
LRR1	186.479	-0.142174	0.311956	-0.455751	0.648569	0.847326
MAN1A1	441.455	0.929654	0.502111	1.85149	0.0640989	0.279293
FBXL4	454.692	0.340088	0.266904	1.27419	0.202595	0.501962
SIM1	33.7136	-4.27639	1.43384	-2.98246	0.00285938	0.0457908
RPL36AL	1976.81	0.188763	0.246652	0.765303	0.444091	0.722151
FAM135A	990.056	0.93665	0.408559	2.29257	0.0218727	0.15609
MGAT2	309.681	0.218929	0.291772	0.750342	0.453049	0.72728
ENSSSCG00000058931	379.86	-0.539738	0.311009	-1.73544	0.0826628	0.319263
DNAAF2	44.0159	-0.177239	0.948274	-0.186907	0.851734	0.946152
ASCC3	1470.33	-0.045133	0.144322	-0.312724	0.75449	0.904966
ADGRB3	15.3182	-0.301355	0.882888	-0.341328	0.732856	0.894482
KLHDC1	139.589	0.182756	0.233351	0.783178	0.433523	0.713994
LRFN5	376.252	-0.450425	0.792401	-0.568431	0.569742	0.802212
FHL5	212.94	2.05948	1.11465	1.84764	0.0646539	0.280705
ENSSSCG00000058693	4.16374	0.446521	1.24924	0.357433	0.720768	NA
KLHDC2	928.114	0.176356	0.281431	0.626641	0.530895	0.779154
ENSSSCG00000043582	0.361084	2.18449	4.04488	0.540065	0.589152	NA
ENSSSCG00000063225	0.215857	1.36248	4.08047	0.333902	0.738454	NA
GPR63	182.509	1.53619	1.23108	1.24784	0.21209	0.513491
NEMF	1094.9	0.0361264	0.149632	0.241434	0.809219	0.928449
RAB11A	8354.51	0.621353	0.496053	1.25259	0.210354	0.511266
NDUFAF4	114.496	-0.565522	0.233233	-2.42471	0.0153206	0.127581
ENSSSCG00000054004	2.44479	0.860838	1.35926	0.633315	0.526528	NA
ENSSSCG00000056940	1.15909	-0.831634	1.94018	-0.428639	0.668186	NA
ENSSSCG00000060433	0.365409	0.400704	4.08047	0.0982003	0.921773	NA
ENSSSCG00000062752	0.183448	1.36248	4.08047	0.333902	0.738454	NA
ENSSSCG00000045756	0.177636	1.36248	4.08047	0.333902	0.738454	NA
ARF6	5014.82	0.999053	0.519968	1.92137	0.0546846	0.255797
ENSSSCG00000043532	0.215857	1.36248	4.08047	0.333902	0.738454	NA
ENSSSCG00000050274	0.177636	1.36248	4.08047	0.333902	0.738454	NA
ENSSSCG00000045405	11.0249	-0.402372	0.683438	-0.588747	0.556031	0.795281
ENSSSCG00000049406	0.215857	1.36248	4.08047	0.333902	0.738454	NA
RTRAF	2468.68	0.187217	0.290899	0.643579	0.519849	0.771135
ENSSSCG00000061626	0.431713	2.40925	4.02526	0.598534	0.549484	NA
ENSSSCG00000060707	2.08104	-3.20585	1.71194	-1.87264	0.0611183	NA
ENSSSCG00000063200	0.142313	-0.561077	4.08047	-0.137503	0.890633	NA
ENSSSCG00000042509	0.319949	0.400704	4.08047	0.0982003	0.921773	NA
ENSSSCG00000060554	1.32146	-2.47602	2.41292	-1.02615	0.30482	NA
NID2	1487.29	1.88898	0.999522	1.88988	0.0587739	0.267026
ENSSSCG00000056194	0.143642	-0.561077	4.08047	-0.137503	0.890633	NA
MEGF11	7.72277	1.9239	1.04258	1.84532	0.0649907	0.281732
ENSSSCG00000059926	0.142313	-0.561077	4.08047	-0.137503	0.890633	NA
ENSSSCG00000059866	0.149552	-0.561077	4.08047	-0.137503	0.890633	NA
ENSSSCG00000057054	76.9655	0.858196	1.32438	0.647998	0.516986	0.76966
PTGER2	154.468	0.704579	0.981163	0.718106	0.472692	0.742041
FRMD6	2500.5	0.491001	0.418072	1.17444	0.240218	0.546252
ENSSSCG00000057794	0.448656	-2.08132	3.99224	-0.521342	0.602128	NA
ENSSSCG00000047735	1.46968	-2.65255	1.85954	-1.42646	0.153737	NA
ENSSSCG00000028092	1132.15	-0.493895	0.37078	-1.33204	0.182846	0.477333
DIS3L	481.928	0.34052	0.215947	1.57686	0.114827	0.377464
TIPIN	175.838	-0.411238	0.305592	-1.34571	0.178397	0.469828
MAP2K1	1199.61	0.447013	0.302669	1.4769	0.139702	0.416659
VCPKMT	138.239	-0.0922867	0.349755	-0.263861	0.791887	0.92145
SOS2	1153.38	0.0972757	0.247317	0.393324	0.69408	0.874017
ENSSSCG00000050792	0.476642	-0.505753	2.85618	-0.177073	0.859451	NA
L2HGDH	284.313	-0.0706374	0.329028	-0.214685	0.830013	0.936647
DMAC2L	149.945	0.206798	0.214608	0.96361	0.335242	0.635594
SNAPC5	137.439	-0.475826	0.305028	-1.55994	0.118773	0.38429
RPL4	30173.8	-0.177029	0.200876	-0.881284	0.378164	0.671999
CTDP1	1118.15	-0.0277064	0.194048	-0.142781	0.886463	0.959695
CDKL1	168.932	0.828255	1.02376	0.809033	0.418496	0.703032
MAP4K5	1204.8	0.331175	0.190033	1.74273	0.0813809	0.316605
PCSK6	504.672	-0.779943	0.590107	-1.3217	0.186269	0.481682
ZWILCH	208.345	0.0596725	0.248667	0.23997	0.810354	0.929023
ENSSSCG00000048049	0.183448	1.36248	4.08047	0.333902	0.738454	NA
ATL1	97.8209	0.704531	0.28397	2.481	0.0131013	0.116893
SNRPA1	643.678	-0.250508	0.330374	-0.758255	0.448298	0.724521
ENSSSCG00000051767	0.543045	1.32216	2.79523	0.473006	0.636209	NA
LCTL	6.03116	0.138718	0.904418	0.153378	0.8781	0.956869
SMAD6	183.122	-0.603081	0.31746	-1.89971	0.0574715	0.262854
TLE3	1870.61	-0.489891	0.22672	-2.16077	0.0307128	0.187174
SAV1	893.605	0.139142	0.229536	0.606187	0.544391	0.787825
MBP	1933.1	-1.37297	0.575852	-2.38424	0.0171143	0.135367
ENSSSCG00000004963	1666.79	-0.504758	0.208829	-2.41708	0.0156454	0.128948
NIN	601.896	0.214755	0.344413	0.623539	0.53293	0.780522
SPESP1	0.42694	-2.01623	3.99614	-0.504544	0.613879	NA
NOX5	24.7209	0.733005	1.10202	0.665144	0.505958	0.762011
GLCE	1271.35	0.0336542	0.417641	0.0805816	0.935775	0.97739
PAQR5	53.213	2.66874	1.3104	2.03658	NA	NA
PYGL	4504.17	0.675908	0.391028	1.72854	0.0838913	0.321294
KIF23	465.283	0.591511	0.94174	0.628104	0.529936	0.778625
ENSSSCG00000004970	18624.8	0.454421	0.331177	1.37214	0.17002	0.458397
ZNF236	676.24	-0.315937	0.175172	-1.80359	0.0712962	0.296525
SMAD3	2702.05	-0.115664	0.239572	-0.482794	0.629242	0.83702
ABHD12B	42.5602	-0.490898	0.518878	-0.946076	0.34411	0.643381
ZNF516	701.619	-0.0535738	0.846507	-0.063288	0.949537	0.981792
TRIM9	58.4348	-0.575326	1.26333	-0.455403	0.648819	0.847459
NFATC1	423.08	0.387872	0.517538	0.749455	0.453583	0.72728
AAGAB	1322.07	-0.0275904	0.333386	-0.0827581	0.934044	0.976672
TMX1	1744.53	0.129314	0.277422	0.466129	0.641123	0.843511
ENSSSCG00000057448	7.12822	-6.07562	2.26212	-2.6858	0.00723556	0.0821638
C15orf61	102.48	0.226311	0.309887	0.730302	0.465206	0.736044
MDGA2	5.96731	0.205661	2.08565	0.0986079	0.92145	0.970924
MAP2K5	622.37	0.308899	0.236955	1.30362	0.192364	0.488749
C14orf28	222.411	0.107287	0.230913	0.464621	0.642203	0.844205
KLHL28	789.826	0.164448	0.241362	0.681333	0.495661	0.755301
TOGARAM1	1423.12	-0.389834	0.345225	-1.12922	0.258806	0.565098
ATP9B	889.679	-0.241383	0.243763	-0.990236	0.322059	0.624834
SKOR1	3.2178	0.841164	0.990121	0.849557	0.395572	NA
PRPF39	773.85	-0.234365	0.247823	-0.945698	0.344302	0.643535
FKBP3	920.422	-0.165883	0.198215	-0.836884	0.402657	0.690603
PIAS1	927.331	0.38645	0.249674	1.54782	0.121666	0.38848
ENSSSCG00000040521	0.441418	-2.05989	3.99351	-0.51581	0.605987	NA
FANCM	118.804	-0.322624	0.343102	-0.940313	0.347057	0.646248
SALL3	85.2528	8.21391	2.54428	3.22838	NA	NA
CALML4	1245.87	0.603046	0.401484	1.50204	0.133086	0.406048
ENSSSCG00000060932	0.796592	-0.222169	1.8335	-0.121172	0.903555	NA
CLN6	1348.46	0.141337	0.424915	0.332624	0.739418	0.897425
TSHZ1	1236.2	-0.432219	0.209203	-2.06603	0.0388256	0.213054
ZADH2	1024.77	-0.0785964	0.254037	-0.30939	0.757025	0.905953
ENSSSCG00000053589	83.3958	-0.0179864	0.224416	-0.0801474	0.93612	0.977569
MIS18BP1	627.652	0.0397061	0.473122	0.0839235	0.933117	0.976366
ENSSSCG00000063467	429.637	-0.0644821	0.251998	-0.255883	0.798041	0.923912
ENSSSCG00000046029	0.149552	-0.561077	4.08047	-0.137503	0.890633	NA
ENSSSCG00000055454	0.901117	1.06181	2.1083	0.503631	0.61452	NA
ENSSSCG00000063380	0.177636	1.36248	4.08047	0.333902	0.738454	NA
CNDP1	504.316	0.61952	0.917681	0.675092	0.499617	0.757716
FEM1B	1237.03	-0.165182	0.230063	-0.717988	0.472765	0.742087
ENSSSCG00000060555	2.49104	2.21216	1.4439	1.53207	0.125506	NA
ITGA11	430.621	1.41345	0.844339	1.67404	0.0941237	0.340812
ENSSSCG00000047397	0.142313	-0.561077	4.08047	-0.137503	0.890633	NA
CORO2B	375.074	1.5353	0.722533	2.12489	0.033596	0.19601
ENSSSCG00000062675	0.142313	-0.561077	4.08047	-0.137503	0.890633	NA
ENSSSCG00000043563	264.497	0.721702	0.431414	1.67288	0.0943518	0.341135
ENSSSCG00000062712	1.193	1.64917	1.95468	0.843703	0.398835	NA
ENSSSCG00000051922	1.61994	0.350936	1.5177	0.231228	0.817137	NA
ENSSSCG00000063237	10.7098	0.637588	0.730018	0.873387	0.382452	0.67508
ENSSSCG00000063081	18.4357	0.483125	0.677618	0.712977	0.47586	0.743898
ENSSSCG00000056226	6.99062	-0.488502	0.694819	-0.703063	0.482016	0.74854
ENSSSCG00000049234	20.6208	-0.640746	0.843549	-0.759583	0.447504	0.72407
ENSSSCG00000062074	2.60802	1.33073	1.62454	0.819142	0.412705	NA
ENSSSCG00000019885	1.30564	-0.340303	1.43594	-0.23699	0.812665	NA
CNDP2	7122.91	0.356602	0.702531	0.507596	0.611737	0.827891
ENSSSCG00000057267	0.35817	0.400704	4.08047	0.0982003	0.921773	NA
ENSSSCG00000059807	1.70125	2.23505	1.86702	1.19712	0.231258	NA
DIPK1C	27.1123	1.95393	1.15596	1.69031	0.0909685	0.334935
UACA	2064.24	1.06035	0.237454	4.46549	7.9885e-06	0.000769772
MPHOSPH10	499.511	-0.490978	0.250358	-1.9611	0.0498669	0.244165
MCEE	285.825	-0.217236	0.281352	-0.772116	0.440046	0.719387
APBA2	43.1422	0.441668	1.37568	0.321055	0.748169	0.902192
FAM189A1	3.79186	-0.889749	0.98304	-0.905099	0.365413	NA
TJP1	6566.33	0.659366	0.279062	2.3628	0.0181377	0.139025
LARP6	268.763	0.979026	0.693261	1.4122	0.15789	0.442128
LRRC49	63.5273	-2.53641	0.945917	-2.68143	0.00733087	0.0825788
GALR1	26.4227	0.774316	1.23504	0.626958	0.530687	0.778984
THSD4	1004.46	-0.277984	0.416052	-0.668148	0.504039	0.760796
C18orf63	0.319949	0.400704	4.08047	0.0982003	0.921773	NA
CYB5A	4456.8	-0.28536	0.348853	-0.817995	0.41336	0.700059
ENSSSCG00000037781	126.807	0.477214	0.569867	0.837413	0.402361	0.690515
TARS3	6.60732	0.862726	0.991492	0.870129	0.38423	0.676375
MYO9A	677.026	0.0417759	0.396665	0.105318	0.916124	0.969656
CBLN2	46.989	3.8981	2.40394	1.62154	NA	NA
TRPM1	1.00609	-3.25229	2.28719	-1.42196	0.155038	NA
SENP8	344.895	0.0065107	0.354672	0.0183569	0.985354	0.994834
ENSSSCG00000026486	6.50759	-4.04323	1.66215	-2.43253	0.0149937	0.12623
ENSSSCG00000026167	76.609	1.2966	0.789462	1.64239	0.100509	0.353102
GEMIN2	384.651	0.220514	0.262615	0.839685	0.401085	0.689239
MTMR10	1005.7	0.202323	0.145515	1.39039	0.16441	0.451098
TRAPPC6B	492.61	0.545501	0.246484	2.21313	0.0268887	0.174865
FAN1	870.829	-0.371328	0.287712	-1.29063	0.196833	0.49437
PNN	2162.53	-0.535732	0.140251	-3.81981	0.000133555	0.00572049
TIMM21	361.819	-0.308257	0.226206	-1.36273	0.172967	0.462609
FBXO15	82.7201	-2.37614	0.929768	-2.55563	0.0105997	0.103001
ENSSSCG00000004983	1455.08	0.175361	0.644332	0.27216	0.785499	0.918831
SOCS6	1092.93	-0.00958467	0.156633	-0.0611917	0.951207	0.982434
RTTN	537.691	-0.12373	0.471166	-0.262603	0.792857	0.922129
CD226	44.5499	-1.11666	0.669966	-1.66675	0.0955644	0.34349
DOK6	38.7896	2.00669	1.46132	1.3732	0.169689	0.457937
TM2D3	221.68	0.108784	0.240142	0.452997	0.650551	0.848499
ENSSSCG00000040252	537.787	-0.358216	0.290961	-1.23115	0.218268	0.520242
ENSSSCG00000052817	0.142313	-0.561077	4.08047	-0.137503	0.890633	NA
ENSSSCG00000061777	0.149552	-0.561077	4.08047	-0.137503	0.890633	NA
ENSSSCG00000041473	0.183448	1.36248	4.08047	0.333902	0.738454	NA
ENSSSCG00000038208	2.32833	-0.420972	1.23905	-0.339755	0.734041	NA
ENSSSCG00000063266	0.888181	3.47777	3.96373	0.877399	0.38027	NA
ENSSSCG00000062837	2.89615	-0.928526	1.30899	-0.709347	0.478109	NA
ENSSSCG00000041275	1.75633	-0.927736	1.96255	-0.47272	0.636413	NA
ENSSSCG00000060706	38.8061	-0.891225	1.27346	-0.699848	0.484022	0.749922
ENSSSCG00000054784	6.81272	-1.89459	1.29655	-1.46125	0.143946	0.422308
ENSSSCG00000034069	11.8494	-2.23445	0.862145	-2.59174	0.00954922	0.0971874
ENSSSCG00000060600	907.905	0.153316	0.842492	0.181979	0.855599	0.947899
ENSSSCG00000060688	16.7483	-0.230342	0.794509	-0.289918	0.771879	0.912534
ENSSSCG00000054425	0.149552	-0.561077	4.08047	-0.137503	0.890633	NA
ENSSSCG00000051884	0.657274	-1.09573	2.70441	-0.405164	0.685357	NA
ENSSSCG00000051812	0.355272	2.16432	4.04679	0.534824	0.592772	NA
ENSSSCG00000053820	0.436836	-2.04622	3.99432	-0.512283	0.608453	NA
ENSSSCG00000055622	0.35817	0.400704	4.08047	0.0982003	0.921773	NA
ENSSSCG00000061734	2.07815	0.91439	1.41109	0.648002	0.516984	NA
ENSSSCG00000054884	0.570582	-2.43383	3.91873	-0.621076	0.534549	NA
ENSSSCG00000054752	1.34598	1.80254	2.61337	0.689738	0.490359	NA
ENSSSCG00000062578	0.607234	-1.06482	2.73086	-0.389921	0.696595	NA
ENSSSCG00000061619	5.48295	-1.33213	0.904046	-1.47352	0.140612	0.418185
ENSSSCG00000049605	0.577821	-2.45138	2.58305	-0.949026	0.342608	NA
ENSSSCG00000043468	0.469502	-0.500889	2.8624	-0.174989	0.861088	NA
ENSSSCG00000047328	2.13384	0.487432	1.6007	0.304513	0.760737	NA
FBXO33	522.588	0.673184	0.245892	2.73772	0.00618668	0.0746786
ENSSSCG00000050191	0.35817	0.400704	4.08047	0.0982003	0.921773	NA
ENSSSCG00000044382	1.21905	-1.23032	1.87935	-0.654651	0.512692	NA
ENSSSCG00000050768	2.95719	-1.48635	1.11644	-1.33133	0.18308	NA
ENSSSCG00000058598	2.65982	0.365326	1.18684	0.307814	0.758224	NA
ENSSSCG00000062021	0.177636	1.36248	4.08047	0.333902	0.738454	NA
ENSSSCG00000060152	26.1445	0.177301	0.985899	0.179837	0.857281	0.948733
ENSSSCG00000053633	13.3219	-0.422767	0.724511	-0.583521	0.559543	0.796789
ENSSSCG00000062595	7.3764	-0.486869	1.13705	-0.428185	0.668517	0.858975
ENSSSCG00000053742	14.287	-0.0246789	1.06046	-0.0232718	0.981433	0.993185
ENSSSCG00000059000	0.177636	1.36248	4.08047	0.333902	0.738454	NA
ENSSSCG00000060666	0.798019	-0.280976	2.67046	-0.105216	0.916204	NA
ENSSSCG00000040442	0.177636	1.36248	4.08047	0.333902	0.738454	NA
ENSSSCG00000061086	0.142313	-0.561077	4.08047	-0.137503	0.890633	NA
ENSSSCG00000056642	1815.38	0.150009	0.435254	0.344647	0.73036	0.892921
ENSSSCG00000052850	0.762696	-1.50288	2.07239	-0.725194	0.468333	NA
ENSSSCG00000062224	22.2072	-0.515135	0.704923	-0.730768	0.464921	0.735956
ENSSSCG00000055457	2.61587	-0.342722	1.07354	-0.319245	0.749541	NA
ENSSSCG00000049454	2.46755	-0.181572	1.11163	-0.163338	0.870252	NA
ENSSSCG00000054354	5.44587	-0.662777	0.859973	-0.770695	0.440888	0.720206
ENSSSCG00000060066	0.142313	-0.561077	4.08047	-0.137503	0.890633	NA
ENSSSCG00000059984	0.448656	-2.08132	3.99224	-0.521342	0.602128	NA
ENSSSCG00000053960	0.775845	-1.53539	3.91701	-0.391979	0.695074	NA
ENSSSCG00000050242	1.49552	-3.82088	3.93256	-0.971602	0.331248	NA
ENSSSCG00000063030	31.7946	-1.04568	1.43138	-0.730536	0.465062	0.735956
ENSSSCG00000056908	0.940764	1.11585	2.75019	0.405735	0.684938	NA
ENSSSCG00000058062	51.306	-0.644862	0.908193	-0.710049	0.477673	0.745186
SNORD18	3.48989	-0.736646	1.04281	-0.706403	0.479937	NA
SNORD16	0.149552	-0.561077	4.08047	-0.137503	0.890633	NA
ENSSSCG00000054231	1.40901	3.03335	2.34709	1.29239	0.196223	NA
IQCH	14.6464	-3.82439	1.60725	-2.37947	0.0173377	0.136287
RGS17	17.5824	0.876261	1.1548	0.758799	0.447973	0.724242
MTRF1L	200.483	-0.130991	0.267825	-0.489093	0.624776	0.834957
FBXO5	122.214	0.0525951	0.680082	0.0773364	0.938356	0.978571
LRP11	291.087	1.51108	0.603983	2.50185	0.0123546	0.113175
PCMT1	1021.46	0.414297	0.327151	1.26638	0.205377	0.505146
ENSSSCG00000004410	63.2535	-8.25861	2.50761	-3.29341	0.000989787	0.0230218
NUP43	233.757	-0.175551	0.242414	-0.72418	0.468955	0.738582
ENSSSCG00000033739	43.3214	-5.80501	1.98897	-2.9186	NA	NA
FIG4	601.239	0.355151	0.203912	1.74169	0.0815626	0.316648
ENSSSCG00000004071	663.665	0.575219	0.443428	1.29721	0.194559	0.49166
ENSSSCG00000046319	59.3063	-0.981816	0.465951	-2.10712	0.0351068	0.200633
OPRM1	0.448656	-2.08132	3.99224	-0.521342	0.602128	NA
ULBP1	18.9363	1.55482	0.789128	1.9703	0.0488039	0.241272
ENSSSCG00000004096	0.843539	0.925416	2.73237	0.338686	0.734846	NA
ENSSSCG00000041378	0.365409	0.400704	4.08047	0.0982003	0.921773	NA
STXBP5	700.424	0.523594	0.324496	1.61356	0.106623	0.363287
ENSSSCG00000004404	30.131	0.507169	0.566291	0.895596	0.370468	0.665277
CDC40	555.95	-0.215535	0.257931	-0.83563	0.403363	0.691392
METTL24	299.575	1.91857	0.975595	1.96656	0.0492336	0.242119
DDO	346.921	-0.962806	0.759731	-1.2673	0.205048	0.504778
SLC22A16	1.3715	-2.49007	1.78432	-1.39553	0.162856	NA
MARCKS	5805.46	0.505741	0.546435	0.925528	0.354691	0.652721
ARMC2	95.2246	-0.963182	1.14327	-0.842481	0.399518	0.688052
SESN1	701.547	1.01382	0.554461	1.82848	0.0674779	0.287253
ENSSSCG00000043354	6.41814	1.28059	1.29565	0.988377	0.322968	0.625589
RAB32	233.817	-3.40384	1.17829	-2.8888	0.00386717	0.0554524
ENSSSCG00000052903	1.08599	1.42125	1.74606	0.813978	0.415657	NA
CEP57L1	53.1112	0.777132	0.419013	1.85468	0.0636426	0.278252
ENSSSCG00000052303	450.103	0.466485	0.303578	1.53662	0.124385	0.392842
ENSSSCG00000032525	8.52411	-0.6334	1.23762	-0.51179	0.608798	0.826335
ENSSSCG00000004415	153.726	-4.20777	1.33717	-3.14677	NA	NA
ENSSSCG00000033578	22.2687	-0.365388	1.2669	-0.288412	0.773031	0.913179
GRM1	0.393493	2.29062	4.03524	0.567654	0.57027	NA
CD164	7033.94	-0.0502637	0.214683	-0.23413	0.814884	0.930967
SHPRH	581.542	-0.471875	0.179988	-2.6217	0.00874912	0.0920611
PPIL6	187.014	-5.85678	1.49977	-3.9051	NA	NA
FBXO30	1025.35	0.706521	0.821496	0.860042	0.389766	0.680748
VIP	24.573	-2.14657	3.58107	-0.599422	NA	NA
SMPD2	565.081	-0.55318	0.535118	-1.03375	0.301252	0.606061
MICAL1	590.484	1.72574	0.834861	2.0671	0.0387244	0.212706
MYCT1	273.539	1.77665	0.728569	2.43855	0.0147463	0.12562
ENSSSCG00000004081	85.6174	-1.63891	0.916193	-1.78883	0.0736426	0.301206
ZBTB24	230.171	-0.384211	0.26087	-1.4728	0.140804	0.418393
SCML4	28.2835	-1.15979	0.676063	-1.7155	0.0862533	0.325423
ENSSSCG00000049158	154.999	-0.0359586	1.02337	-0.0351375	0.97197	0.98993
SEC63	3271.61	-0.024352	0.1676	-0.145299	0.884475	0.959228
ENSSSCG00000004082	2391.97	0.311634	0.834644	0.373374	0.70887	0.88248
OSTM1	987.5	0.73968	0.242803	3.04642	0.00231587	0.0402188
NR2E1	9.854	-0.0852859	0.578954	-0.14731	0.882887	0.958738
SNX3	2373.97	0.44247	0.27205	1.62643	0.103859	0.358734
AFG1L	204.199	-0.631049	0.327251	-1.92833	0.0538136	0.253871
ENSSSCG00000004387	5328.7	0.48187	0.192708	2.50052	0.012401	0.113221
ESR1	13687.6	0.107518	0.42069	0.255576	0.798278	0.923912
HDAC2	1938.22	-0.166593	0.288678	-0.57709	0.563879	0.798714
ENSSSCG00000046251	4.59413	-1.1236	1.35334	-0.830245	0.4064	NA
CCDC170	896.141	0.105854	0.75008	0.141123	0.887773	0.960195
HS3ST5	6.65629	1.43562	2.20213	0.651922	0.514451	0.768028
FRK	731.039	-0.290323	0.72882	-0.398346	0.690375	0.871914
ARMT1	605.111	0.473284	0.20008	2.36548	0.0180069	0.13878
CDK19	966.157	0.537737	0.180292	2.98258	0.00285828	0.0457908
RMND1	194.593	-0.231535	0.301695	-0.767445	0.442817	0.721149
AMD1	1758.67	-0.542339	0.365152	-1.48524	0.13748	0.413396
ZBTB2	269.151	-0.333424	0.309863	-1.07604	0.281911	0.587623
AKAP12	3322.47	0.346653	0.841235	0.412076	0.680284	0.866699
GTF3C6	688.495	-0.00992861	0.193663	-0.0512675	0.959112	0.98523
MTHFD1L	365.528	-1.3867	0.711913	-1.94785	0.0514333	0.248231
RPF2	346.251	-0.827621	0.351291	-2.35594	0.0184757	0.140658
SLC16A10	17.7884	-0.910326	1.04735	-0.86917	0.384754	0.67641
MFSD4B	31.905	-0.25447	0.509218	-0.499727	0.617267	0.830553
REV3L	1305.62	-0.491059	0.266855	-1.84017	0.0657432	0.283691
TRAF3IP2	1113	0.232222	0.284874	0.815174	0.414973	0.701031
FYN	409.632	0.8289	0.569212	1.45622	0.145331	0.424439
PLEKHG1	525.639	0.218137	0.387703	0.562639	0.573681	0.804551
ENSSSCG00000040966	0.541618	1.33845	2.80251	0.477591	0.632942	NA
CCN6	25.0255	0.983957	0.820395	1.19937	0.230384	0.534752
IYD	34.808	-1.32594	1.25184	-1.0592	0.289509	0.595075
PPP1R14C	456.436	0.46492	1.12988	0.411477	0.680723	0.866863
TUBE1	74.4899	-0.518593	0.297006	-1.74607	0.0807985	0.315322
ENSSSCG00000035574	12.6925	1.40896	0.901334	1.56319	0.118007	0.382978
FAM229B	18.331	-2.31384	1.81912	-1.27196	0.203388	0.50252
LAMA4	3960.65	1.60052	0.863914	1.85264	0.0639345	0.279048
TFB1M	267.888	-0.135332	0.335747	-0.403078	0.686891	0.870055
TIAM2	64.7836	0.298095	0.632377	0.471388	0.637364	0.841806
SCAF8	1671.66	-0.391359	0.117685	-3.32548	0.000882675	0.0215718
ATG5	1076.08	0.210283	0.197935	1.06238	0.288063	0.593549
PTGS1	94.2753	1.80956	0.48052	3.76583	0.000165994	0.0067126
ENSSSCG00000031644	4.19914	-0.736296	1.08397	-0.679261	0.496973	NA
PPP2R5E	1848.09	0.0841016	0.132035	0.636966	0.524147	0.774169
LATS1	1465.96	-0.388204	0.173101	-2.24265	0.0249194	0.167698
PDCL	1087.52	-0.151829	0.262954	-0.577396	0.563672	0.798585
KATNA1	584.639	-0.0366967	0.255584	-0.14358	0.885832	0.959695
PRDM1	579.933	2.81085	0.742056	3.78793	0.000151908	0.00630187
GPHB5	3.42084	-5.01645	2.95349	-1.69848	0.0894168	NA
RC3H2	1040.27	0.0736076	0.263045	0.279829	0.779608	0.91639
RHOJ	466.898	0.978091	0.841406	1.16245	0.245054	0.551567
GINM1	1630.16	0.375947	0.117347	3.20371	0.0013567	0.0285617
PPIL4	458.635	-0.108364	0.181985	-0.595457	0.551538	0.792213
CRYBG1	3915.15	0.80071	0.747934	1.07056	0.284366	0.590323
ZC3H12D	53.5224	-0.3535	0.620805	-0.569421	0.56907	0.801787
TAB2	2232.14	0.377606	0.172767	2.18564	0.028842	0.181682
SLC24A2	23.8303	1.65146	1.67635	0.985153	0.324549	0.627061
TTLL11	12.1365	-0.0774398	0.726533	-0.106588	0.915116	0.969133
UST	686.549	0.349227	0.380052	0.918893	0.358151	0.655545
ACER2	220.067	-0.800528	0.607875	-1.31693	0.187862	0.483461
NDUFA8	742.665	0.0658158	0.235151	0.279887	0.779564	0.91639
RPS6	20752.3	-0.118972	0.287625	-0.413635	0.679141	0.865969
ENSSSCG00000041504	10.9898	-0.0184371	1.0975	-0.0167992	0.986597	0.995054
SASH1	1880.23	1.44248	0.48938	2.94756	0.00320294	0.0493568
ENSSSCG00000005529	103.527	-5.37654	1.59084	-3.37968	0.000725715	0.019135
RTN4IP1	185.603	-0.264362	0.312439	-0.846125	0.397483	0.6865
LHX6	146.677	2.62379	0.659538	3.97823	6.94312e-05	0.00359147
ENSSSCG00000054030	0.727981	3.19079	3.67165	0.869033	0.384829	NA
SAMD5	28.9056	0.0852966	0.757266	0.112637	0.910318	0.968344
DENND4C	1644.64	-0.410024	0.376608	-1.08873	0.276274	0.582705
ENSSSCG00000060764	1.0882	-2.08196	1.91906	-1.08489	0.277971	NA
ENSSSCG00000063189	7.73667	1.48238	0.78601	1.88596	0.0593008	0.268088
QRSL1	330.34	-0.151597	0.367633	-0.412358	0.680077	0.866699
ENSSSCG00000051971	0.177636	1.36248	4.08047	0.333902	0.738454	NA
ENSSSCG00000056379	3097.25	4.23913	1.18544	3.57601	NA	NA
ENSSSCG00000054741	0.143642	-0.561077	4.08047	-0.137503	0.890633	NA
ENSSSCG00000055261	0.319949	0.400704	4.08047	0.0982003	0.921773	NA
MTRES1	274.697	0.0768636	0.308201	0.249395	0.803056	0.925817
ENSSSCG00000054787	0.365409	0.400704	4.08047	0.0982003	0.921773	NA
DMRTA1	4.11528	1.2922	2.04415	0.632146	0.527292	NA
ENSSSCG00000054439	0.613144	-1.08027	2.17073	-0.497655	0.618727	NA
ENSSSCG00000058871	2.67336	0.384932	1.03648	0.371386	0.71035	NA
CDKN2B	2123.67	1.35652	0.787884	1.72173	0.0851186	0.323406
BEND3	187.634	-0.744581	0.373897	-1.99141	0.0464363	0.234782
ENSSSCG00000052174	0.733793	3.20042	3.97569	0.804996	0.420822	NA
ENSSSCG00000052694	3.04582	0.402943	1.07468	0.374943	0.707703	NA
P14ARF	27.7332	1.43177	0.8433	1.69782	0.0895417	0.332317
ENSSSCG00000043123	17.0749	0.390899	0.556715	0.702153	0.482584	0.748786
PDSS2	243.694	-0.378924	0.190002	-1.99432	0.0461175	0.234268
RBM18	872.343	0.500203	0.185061	2.70291	0.00687349	0.0798263
ENSSSCG00000054729	27.4974	0.617992	0.911983	0.677635	0.498003	0.757038
ENSSSCG00000060161	7.15187	-0.489143	0.736151	-0.66446	0.506396	0.762248
MRRF	494.76	0.29429	0.225047	1.30768	0.190981	0.487439
ELAVL2	4.2363	-1.02029	1.52257	-0.670111	0.502787	NA
ENSSSCG00000055791	0.149552	-0.561077	4.08047	-0.137503	0.890633	NA
ENSSSCG00000059324	42.3106	-0.656559	1.49905	-0.437983	0.661399	0.85408
ENSSSCG00000050987	69.3144	-0.878937	0.397785	-2.20958	0.0271344	0.175884
ENSSSCG00000042025	5.75149	-1.05984	0.799707	-1.32529	0.185076	0.480185
SOBP	118.508	0.730148	0.841441	0.867735	0.38554	0.677073
ENSSSCG00000042082	0.758804	1.95791	2.66172	0.735582	0.461985	NA
ENSSSCG00000054991	0.177636	1.36248	4.08047	0.333902	0.738454	NA
ENSSSCG00000054300	0.177636	1.36248	4.08047	0.333902	0.738454	NA
ENSSSCG00000059819	2.6699	4.02559	2.22488	1.80935	0.0703962	NA
ENSSSCG00000053361	2.75638	3.09859	1.49878	2.0674	0.038696	NA
LHX2	0.319949	0.400704	4.08047	0.0982003	0.921773	NA
ENSSSCG00000061000	0.470733	-0.482275	4.03893	-0.119407	0.904953	NA
ENSSSCG00000043946	0.177636	1.36248	4.08047	0.333902	0.738454	NA
ENSSSCG00000047473	0.504824	1.20254	4.04678	0.29716	0.766344	NA
ENSSSCG00000059436	3.33309	2.25494	1.47625	1.52747	0.126643	NA
ENSSSCG00000053486	0.183448	1.36248	4.08047	0.333902	0.738454	NA
ENSSSCG00000042456	0.142313	-0.561077	4.08047	-0.137503	0.890633	NA
NEK6	631.542	-0.45688	0.295914	-1.54396	0.122597	0.38977
ENSSSCG00000004396	0.142313	-0.561077	4.08047	-0.137503	0.890633	NA
ENSSSCG00000049293	0.142313	-0.561077	4.08047	-0.137503	0.890633	NA
ENSSSCG00000044325	1.42445	-1.38641	1.97024	-0.703677	0.481634	NA
ENSSSCG00000051997	0.177636	1.36248	4.08047	0.333902	0.738454	NA
ENSSSCG00000037071	0.177636	1.36248	4.08047	0.333902	0.738454	NA
PSMB7	1080.66	0.090024	0.295619	0.304527	0.760727	0.907801
ENSSSCG00000056148	0.431713	2.40925	4.02526	0.598534	0.549484	NA
ENSSSCG00000052578	3.91587	-0.707774	1.09999	-0.643439	0.51994	NA
ENSSSCG00000044869	0.863427	3.41919	3.96607	0.86211	0.388627	NA
ENSSSCG00000045922	1.17649	-2.28093	2.50084	-0.912066	0.361734	NA
ENSSSCG00000049906	3.67898	-1.38214	1.29829	-1.06459	0.287062	NA
ENSSSCG00000053064	17.162	-1.38096	0.838931	-1.64609	0.0997445	0.35166
ENSSSCG00000052646	0.177636	1.36248	4.08047	0.333902	0.738454	NA
ENSSSCG00000045749	0.183448	1.36248	4.08047	0.333902	0.738454	NA
SGPP1	1446.24	0.599776	0.324	1.85116	0.0641464	0.279293
ENSSSCG00000055680	0.143642	-0.561077	4.08047	-0.137503	0.890633	NA
ENSSSCG00000049152	5.33915	0.0772339	1.00406	0.0769215	0.938686	0.978673
ENSSSCG00000058772	0.32709	0.400704	4.08047	0.0982003	0.921773	NA
WDR89	190.455	-0.281368	0.253533	-1.10979	0.267091	0.574438
ENSSSCG00000051913	0.434179	-2.0382	3.99481	-0.510212	0.609903	NA
ENSSSCG00000063343	1.13984	-3.43156	3.53257	-0.971404	0.331347	NA
ENSSSCG00000047452	0.399305	2.30954	4.0336	0.572575	0.566932	NA
ENSSSCG00000054646	20.2539	-0.346968	0.499248	-0.694981	0.487067	0.751444
ENSSSCG00000032084	0.149552	-0.561077	4.08047	-0.137503	0.890633	NA
ENSSSCG00000047924	0.291865	-1.4638	4.03716	-0.362581	0.716918	NA
ENSSSCG00000050853	2.9532	-1.48038	1.19681	-1.23695	0.216107	NA
ENSSSCG00000053219	15.1294	-0.757866	0.722766	-1.04856	0.294379	0.599831
ENSSSCG00000051118	7.21831	-1.09846	0.894668	-1.22779	0.219526	0.521574
ENSSSCG00000041974	0.59097	-2.48078	3.90297	-0.635615	0.525028	NA
ENSSSCG00000057365	5.89493	0.61882	1.24426	0.497339	0.61895	0.830801
ENSSSCG00000048523	5.514	-0.458748	0.885131	-0.518282	0.604261	0.824139
ENSSSCG00000053065	2.09402	1.40128	1.40538	0.997087	0.318723	NA
ENSSSCG00000062078	1.58701	2.13538	2.72488	0.783661	0.433239	NA
ENSSSCG00000061300	0.359499	0.400704	4.08047	0.0982003	0.921773	NA
ENSSSCG00000055924	553.075	10.3196	1.28104	8.05565	7.90568e-16	2.22189e-12
NR5A1	1.54721	-1.57806	1.75846	-0.897411	0.3695	NA
ENSSSCG00000055717	0.215857	1.36248	4.08047	0.333902	0.738454	NA
TEK	919.294	0.730071	0.319831	2.28268	0.0224494	0.158461
ENSSSCG00000047964	0.430927	-2.02841	3.9954	-0.507686	0.611674	NA
NR6A1	191.703	-0.634126	0.315907	-2.00732	0.0447159	0.23018
ENSSSCG00000060766	0.142313	-0.561077	4.08047	-0.137503	0.890633	NA
ENSSSCG00000061205	0.393493	2.29062	4.03524	0.567654	0.57027	NA
ENSSSCG00000026396	0.299104	-1.49468	4.03444	-0.370481	0.711024	NA
ENSSSCG00000044366	0.615162	2.93144	3.82575	0.766238	0.443535	NA
ENSSSCG00000061592	149.684	0.714249	0.96863	0.73738	0.460891	0.733021
OLFML2A	10014.7	0.297625	0.392627	0.758035	0.44843	0.724665
ENSSSCG00000050067	21.6854	-0.301364	0.469765	-0.64152	0.521185	0.771703
ENSSSCG00000042842	18.2861	-0.560102	0.791172	-0.70794	0.478983	0.746427
WDR38	102.844	-5.34357	1.68676	-3.16795	0.00153516	0.0311146
IFT74	215.945	-0.917893	0.652107	-1.40758	0.159255	0.443529
RPL35	9240.89	0.204012	0.242066	0.842798	0.399342	0.688052
LRRC19	1.2086	-2.31393	2.45198	-0.943697	0.345324	NA
ARPC5L	977.311	0.580252	0.479101	1.21113	0.225847	0.52954
ENSSSCG00000045059	0.299104	-1.49468	4.03444	-0.370481	0.711024	NA
PLAA	720.445	0.202158	0.166875	1.21144	0.225728	0.529511
GOLGA1	617.706	0.197697	0.283568	0.697177	0.485692	0.750707
PLIN2	745.552	0.713652	0.468817	1.52224	0.127949	0.39829
SERPINB13	1.13161	2.64778	2.45705	1.07763	0.2812	NA
ZBTB6	262.5	-0.355686	0.185333	-1.91918	0.0549618	0.256524
SERPINB12	17.0607	4.49801	1.79832	2.50124	0.012376	0.113176
ZBTB26	320.976	-0.282331	0.300122	-0.940722	0.346847	0.645929
SERPINB11	2837.05	3.22675	0.787868	4.09554	4.21177e-05	0.00248636
RABGAP1	2068	0.188224	0.207317	0.907904	0.363929	0.660528
HAUS6	726.649	-0.166117	0.167271	-0.993103	0.32066	0.623384
SERPINB5	7419.16	0.71033	0.888693	0.799298	0.424118	0.707401
STRBP	1051.89	-0.55748	0.446916	-1.24739	0.212254	0.513559
DSEL	219.41	0.33932	0.409238	0.82915	0.40702	0.694202
KDSR	1252.9	0.11174	0.408404	0.273602	0.784391	0.918236
ADAMTSL1	535.882	1.7541	0.664465	2.63987	0.00829388	0.0889747
PHLPP1	787.018	0.0213288	0.361604	0.0589837	0.952965	0.982926
HACD4	559.733	0.177342	0.907963	0.195319	0.845143	0.943335
FOCAD	948.764	-0.408579	0.186394	-2.19201	0.0283787	0.179771
ZCCHC2	1382.26	-0.389666	0.334754	-1.16404	0.244409	0.550852
TNFRSF11A	273.737	1.34015	0.566062	2.36749	0.0179092	0.138406
ATP8B1	2084.94	-0.315519	0.310279	-1.01689	0.309206	0.613284
ENSSSCG00000050047	0.664513	-1.1195	3.9691	-0.282053	0.777903	NA
MLLT3	777.386	-0.228459	0.401665	-0.568781	0.569505	0.802169
ENSSSCG00000061715	0.299104	-1.49468	4.03444	-0.370481	0.711024	NA
ENSSSCG00000005135	811.146	0.271285	0.39625	0.684631	0.493577	0.754649
SLC51B	94.7936	2.19777	1.55351	1.41472	NA	NA
CRB2	7.50215	-0.350311	0.76125	-0.460179	0.645388	0.845859
RASL12	2212.62	1.88999	1.49568	1.26364	NA	NA
IFNE	49.5505	-1.61803	1.26229	-1.28182	0.199904	0.498036
UBAP1L	32.0934	2.16479	0.951244	2.27574	0.0228613	0.160255
ENSSSCG00000047263	4.52913	-1.2774	1.26602	-1.00899	0.31298	NA
PDCD7	490.537	-0.046232	0.30821	-0.150001	0.880764	0.957887
ENSSSCG00000043817	210.016	-0.268625	0.530988	-0.505896	0.612929	0.828152
CLPX	1982.43	0.535074	0.190952	2.80214	0.00507649	0.0657304
IFN-ALPHA-8	17.3559	0.997312	1.07666	0.926302	0.354289	0.652721
ENSSSCG00000038797	6.10572	0.0015883	0.9133	0.00173908	0.998612	0.999669
DENND1A	752.556	0.00378779	0.264484	0.0143214	0.988574	0.995837
CILP	50.754	-0.30747	0.319354	-0.962788	0.335654	0.635755
ENSSSCG00000031075	10.0654	-2.16471	1.04217	-2.07712	0.0377908	0.209146
ENSSSCG00000051765	1.33672	-0.298536	1.58526	-0.18832	0.850626	NA
IFN-ALPHA-15	29.9653	0.490944	0.655545	0.74891	0.453912	0.72755
IFN-OMEGA-6	181.202	-0.480921	0.340319	-1.41315	0.157613	0.441645
IFNA1	0.974758	2.38426	2.60946	0.913698	0.360875	NA
PARP16	1063.6	-0.115944	0.421177	-0.275286	0.783097	0.917901
IFNB1	0.177636	1.36248	4.08047	0.333902	0.738454	NA
IFN-ALPHAOMEGA	0.215857	1.36248	4.08047	0.333902	0.738454	NA
ENSSSCG00000054127	21.334	0.39525	0.782992	0.504794	0.613704	0.828268
ENSSSCG00000052428	0.293194	-1.46953	4.03665	-0.364048	0.715822	NA
TUSC1	56.162	-0.0401479	0.350813	-0.114442	0.908887	0.967892
RRAGA	1760.43	0.208388	0.172799	1.20596	0.227834	0.531908
IGDCC4	224.279	0.831526	0.780049	1.06599	0.286427	0.592014
ENSSSCG00000031529	17.9437	-1.39173	1.298	-1.07221	0.283627	0.589603
ENSSSCG00000058490	3.11353	-3.81512	1.48576	-2.56779	0.010235	NA
ENSSSCG00000063314	0.291865	-1.4638	4.03716	-0.362581	0.716918	NA
ENSSSCG00000062062	2.50788	-3.49624	1.5956	-2.19118	0.028439	NA
ENSSSCG00000057273	5.29888	-1.10728	1.07789	-1.02727	0.304292	0.608681
ENSSSCG00000056734	17.7087	-0.7408	0.803557	-0.921901	0.35658	0.654371
DPP8	1916.55	-0.264752	0.194824	-1.35893	0.174169	0.463984
ENSSSCG00000054285	1.98085	-0.536507	1.44625	-0.370964	0.710665	NA
ENSSSCG00000057864	8.09758	0.592275	0.923634	0.641245	0.521364	0.771703
ENSSSCG00000060359	0.541618	1.33845	2.80251	0.477591	0.632942	NA
ENSSSCG00000059966	4.14956	5.69806	2.68367	2.12323	0.0337346	NA
ENSSSCG00000053403	2.00384	4.65319	2.15014	2.16413	0.0304541	NA
PAPPA	25.586	0.670738	1.01633	0.659961	0.509279	0.764462
ENSSSCG00000059082	12.1053	0.681577	1.01886	0.668957	0.503523	0.760357
ENSSSCG00000057745	8.17004	-2.343	1.10867	-2.11334	0.0345718	0.199341
ENSSSCG00000033560	89.3949	10.1248	1.7135	5.90888	3.44443e-09	1.26299e-06
ENSSSCG00000052950	10.8713	-1.03123	0.867797	-1.18833	0.234704	0.540168
ENSSSCG00000060748	3.14266	-1.1745	1.23511	-0.950929	0.341641	NA
KLHL9	1876.55	-0.300937	0.117667	-2.55754	0.0105416	0.102814
ENSSSCG00000059717	1.18584	0.0485699	2.02971	0.0239295	0.980909	NA
IFN-OMEGA-2	3.91323	0.772627	1.94257	0.397734	0.690826	NA
ASTN2	6.57727	0.833665	1.00482	0.829664	0.406729	0.693987
HACD3	2050.95	0.102788	0.36849	0.278944	0.780288	0.91655
IFN-DELTA-1	6.81076	-2.29919	1.01677	-2.26126	0.0237432	0.163755
ENSSSCG00000063223	0.514961	-0.532904	4.03444	-0.132089	0.894914	NA
ENSSSCG00000057852	2.38659	0.773715	2.585	0.29931	0.764704	NA
ENSSSCG00000060250	0.284627	-1.43241	4.03998	-0.354559	0.72292	NA
ENSSSCG00000056145	0.177636	1.36248	4.08047	0.333902	0.738454	NA
TRIM32	549.123	-0.045178	0.416517	-0.108466	0.913626	0.968656
ENSSSCG00000045802	0.32709	0.400704	4.08047	0.0982003	0.921773	NA
INTS14	518.31	-0.333362	0.224698	-1.4836	0.137915	0.414102
TLR4	1386.54	0.642542	0.624299	1.02922	0.303376	0.607652
ENSSSCG00000043340	1.20304	0.811526	2.00971	0.403802	0.686358	NA
ENSSSCG00000057059	3.42914	-0.823156	1.56389	-0.52635	0.598645	NA
ENSSSCG00000061638	0.177636	1.36248	4.08047	0.333902	0.738454	NA
ENSSSCG00000052000	0.149552	-0.561077	4.08047	-0.137503	0.890633	NA
BRINP1	2.14593	-4.34476	2.18415	-1.98922	0.0466765	NA
ENSSSCG00000035890	0.660091	0.345438	2.76455	0.124953	0.900561	NA
ENSSSCG00000059105	0.442746	-2.06386	3.99327	-0.516835	0.605272	NA
ENSSSCG00000054155	0.469404	-0.479423	2.85461	-0.167947	0.866625	NA
ENSSSCG00000062238	1.08325	3.7642	3.27313	1.15003	0.25013	NA
ENSSSCG00000053028	0.726395	1.89624	2.65637	0.713844	0.475324	NA
ENSSSCG00000062358	0.393493	2.29062	4.03524	0.567654	0.57027	NA
ENSSSCG00000057062	65.5731	0.199469	0.708334	0.281603	0.778248	0.915876
ENSSSCG00000062309	0.946046	-0.630785	2.02096	-0.312121	0.754949	NA
ENSSSCG00000054719	39.4116	-1.73746	0.743336	-2.33739	0.0194191	0.14541
ENSSSCG00000054559	51.7215	-2.00477	0.685254	-2.92559	0.00343799	0.0514294
ENSSSCG00000051482	54.424	-0.954475	0.777965	-1.22689	0.219865	0.521828
ENSSSCG00000042822	4.65836	0.184901	1.05068	0.175982	0.860308	NA
ENSSSCG00000053878	0.902446	1.07371	2.65704	0.404099	0.68614	NA
CDK5RAP2	983.227	0.0180921	0.361886	0.0499941	0.960127	0.985338
ENSSSCG00000055858	23.9885	-0.576415	0.632884	-0.910776	0.362414	0.659118
ENSSSCG00000045852	0.940764	1.11585	2.75019	0.405735	0.684938	NA
ENSSSCG00000060537	38.9018	-0.645943	0.576848	-1.11978	0.262808	0.570143
ENSSSCG00000050165	3.16442	2.17351	1.1695	1.8585	0.0630987	NA
CDH7	0.142313	-0.561077	4.08047	-0.137503	0.890633	NA
SLC24A1	36.0505	-1.24031	0.714597	-1.73567	0.0826219	0.319263
ENSSSCG00000020562	0.576941	2.84628	2.62395	1.08473	0.278041	NA
ENSSSCG00000055377	0.428269	-2.0203	3.99589	-0.505594	0.613142	NA
MIR491	0.581266	1.44744	4.02206	0.359876	0.71894	NA
ssc-mir-31	0.183448	1.36248	4.08047	0.333902	0.738454	NA
ENSSSCG00000053029	399.678	0.0336653	0.24444	0.137724	0.890458	0.961057
DENND4A	726.422	0.22303	0.231453	0.963607	0.335243	0.635594
RELCH	1715.4	0.149839	0.397047	0.377383	0.705889	0.88069
PIGN	929.077	0.0483766	0.440881	0.109727	0.912626	0.968407
RNF152	27.6927	0.49722	0.77902	0.638264	0.523302	0.773531
CDH20	4.64856	1.83785	2.19841	0.835991	0.40316	NA
ENSSSCG00000036234	29.531	2.44203	2.25154	1.08461	0.278096	0.584512
CDH19	21.9909	0.665972	1.6287	0.408898	0.682614	0.867701
PMAIP1	251.808	0.104903	0.316294	0.331664	0.740143	0.897835
CCBE1	242.537	-0.0777498	0.957814	-0.0811742	0.935303	0.977212
LMAN1	1475.47	-0.122584	0.149139	-0.821947	0.411107	0.697926
ENSSSCG00000034415	1003.23	0.341442	0.269126	1.26871	0.204545	0.503834
LIPG	79.3397	1.35253	0.943569	1.43342	0.151737	0.433392
CPLX4	0.652693	-1.08386	2.70287	-0.401003	0.688418	NA
GRP	0.142313	-0.561077	4.08047	-0.137503	0.890633	NA
DYM	1350.14	0.249273	0.247687	1.0064	0.314222	0.617871
SEC11C	681.785	0.317176	0.342316	0.926559	0.354156	0.652671
ENSSSCG00000004911	2.22348	1.06479	1.29047	0.825118	0.409305	NA
ZNF532	1037.92	0.644557	0.546891	1.17858	0.238564	0.544445
CXXC1	1164.59	0.079994	0.157989	0.506328	0.612626	0.828121
MALT1	555.058	0.399216	0.171845	2.32312	0.0201728	0.148613
SKA1	35.2719	0.999876	1.20676	0.828563	0.407352	0.694461
ZBTB7C	1831.29	-0.0186457	0.735751	-0.0253425	0.979782	0.993169
CTIF	848.359	1.35778	0.652983	2.07935	0.0375853	0.208487
ENSSSCG00000004489	266111	0.0569597	0.215717	0.264049	0.791742	0.92145
MTO1	354.928	-0.615195	0.220569	-2.78913	0.00528498	0.0673117
ALPK2	16.9663	-0.150704	0.553306	-0.272369	0.785338	0.918707
CGAS	143.978	-0.544222	0.648718	-0.83892	0.401514	0.689835
RNF165	2.90528	-0.560732	1.24114	-0.451787	0.651423	NA
RPL17-C18orf32	16214.9	0.179683	0.228883	0.785044	0.432428	0.713356
NEDD4L	1574.35	0.0992522	0.321403	0.308809	0.757467	0.906027
LOXHD1	1.01924	-3.26824	2.24816	-1.45374	0.146018	NA
ST8SIA5	15.4195	-0.359517	0.877046	-0.409918	0.681866	0.867242
PIAS2	937.106	0.0883928	0.311362	0.283891	0.776494	0.914706
KATNAL2	18.8043	-1.32467	1.0663	-1.24231	0.214123	0.515269
HDHD2	439.811	0.369865	0.440541	0.83957	0.401149	0.689279
ENSSSCG00000060420	1178.78	0.0161546	0.199224	0.0810878	0.935372	0.977212
C18orf25	806.198	-0.22181	0.23986	-0.924746	0.355098	0.652788
DCC	12.1287	6.25958	2.16463	2.89175	0.00383106	0.0551221
MAPK4	27.8652	0.566588	1.40464	0.403369	0.686677	0.869869
SMAD7	353.553	0.354574	0.57635	0.615206	0.538418	0.78373
SMAD2	1214.47	0.0228436	0.154919	0.147455	0.882773	0.958738
CD109	2621.32	0.649259	0.447879	1.44963	0.147162	0.427124
SLC17A5	505.906	-0.16888	0.441898	-0.38217	0.702335	0.878466
SETBP1	808.565	-0.753715	0.547262	-1.37725	0.168435	0.45628
MEGF9	1207.07	0.756272	0.372396	2.03082	0.0422728	0.223603
ENSSSCG00000045948	0.962506	0.329767	2.64931	0.124473	0.900941	NA
ENSSSCG00000004491	22.2334	1.86193	0.598792	3.10947	0.00187423	0.0353526
ENSSSCG00000005508	316.64	0.580968	0.300947	1.93046	0.0535495	0.253511
SLC14A1	690.487	0.654489	1.20839	0.541621	NA	NA
PSMD5	979.826	0.535231	0.181221	2.95347	0.00314221	0.0486667
SIGLEC15	169.066	-0.816158	0.966755	-0.844224	0.398544	0.687464
EPG5	446.27	-0.363042	0.370261	-0.980503	0.326838	0.628596
ATP5F1A	8413.99	-0.369424	0.333046	-1.10923	0.267332	0.574624
ENSSSCG00000039972	540.083	-0.22704	0.26637	-0.852349	0.394021	0.683446
PHF19	688.764	1.5655	0.42524	3.68145	0.00023191	0.00872925
HAUS1	177.06	0.0678394	0.439499	0.154356	0.877329	0.956639
TRAF1	283.79	0.895957	0.470162	1.90563	0.0566976	0.261013
MRO	2.62401	1.40546	1.22259	1.14958	0.250318	NA
C5	83.2257	1.57983	0.849499	1.85973	0.0629244	0.276831
ME2	1028.33	0.168767	0.657149	0.256817	0.79732	0.923824
ENSSSCG00000032297	541.378	-0.370402	0.593272	-0.624338	0.532406	0.780332
ELAC1	202.268	-0.254253	0.318898	-0.797284	0.425286	0.708026
SMAD4	2019.81	0.278766	0.259601	1.07382	0.282902	0.588742
MEX3C	1108.53	-0.0755125	0.250464	-0.30149	0.763041	0.908357
ACAA2	496.581	0.160093	0.439278	0.364447	0.715524	0.885711
ENSSSCG00000004511	2456.1	-0.396362	0.790102	-0.501659	0.615907	0.829622
ENSSSCG00000045942	0.469404	-0.479423	2.85461	-0.167947	0.866625	NA
ENSSSCG00000041158	3.8497	-5.18666	3.204	-1.61881	0.105488	NA
ENSSSCG00000055973	213.639	-1.47276	0.839382	-1.75458	0.079331	0.312544
MBD1	1383.1	-0.135452	0.204907	-0.661043	0.508584	0.763711
ENSSSCG00000047971	1.01245	0.400119	1.57843	0.253491	0.799889	NA
ENSSSCG00000049462	1.94727	-0.0869929	1.6707	-0.0520698	0.958473	NA
ENSSSCG00000062247	0.149552	-0.561077	4.08047	-0.137503	0.890633	NA
ENSSSCG00000056498	18.1387	0.254927	0.466722	0.546208	0.584923	0.811548
ENSSSCG00000057366	12.1053	-0.682053	0.991079	-0.688192	0.491332	0.753417
ENSSSCG00000056811	0.143642	-0.561077	4.08047	-0.137503	0.890633	NA
ENSSSCG00000062617	0.215857	1.36248	4.08047	0.333902	0.738454	NA
ENSSSCG00000054029	0.359499	0.400704	4.08047	0.0982003	0.921773	NA
ENSSSCG00000062205	9.28896	0.724646	1.01686	0.712631	0.476074	0.744094
ENSSSCG00000061702	0.143642	-0.561077	4.08047	-0.137503	0.890633	NA
ENSSSCG00000048066	0.291865	-1.4638	4.03716	-0.362581	0.716918	NA
ENSSSCG00000055877	0.498914	1.20254	4.04678	0.29716	0.766344	NA
SNORD58	0.149552	-0.561077	4.08047	-0.137503	0.890633	NA
ENSSSCG00000020491	0.435508	-2.04216	2.76987	-0.737275	0.460955	NA
ENSSSCG00000020045	2.43232	-0.593711	1.10235	-0.538588	0.590171	NA
ENSSSCG00000060601	176.972	2.17746	0.828356	2.62865	0.00857241	0.0910879
VPS4B	2572.61	0.171016	0.39212	0.436132	0.662741	0.855007
TMX3	1315.9	0.279928	0.180269	1.55284	0.120462	0.387024
SERPINB8	1483.24	1.10887	0.583624	1.89998	0.057436	0.262763
SERPINB10	1529.17	0.829735	1.13858	0.728747	0.466156	0.736678
SERPINB2	1239.74	1.12659	1.13785	0.990105	0.322123	0.624834
ENSSSCG00000034000	114.339	-0.484402	0.863776	-0.560796	0.574936	0.805513
SERPINB7	80.2627	-1.35098	0.837656	-1.61281	0.106786	0.363489
KBTBD13	2.16528	2.65903	1.77279	1.49991	0.133638	NA
MC4R	6.20764	1.85148	2.15689	0.8584	0.390672	0.681224
ENSSSCG00000037349	0.607234	-1.06482	2.73086	-0.389921	0.696595	NA
ENSSSCG00000050338	1.19229	-2.30115	1.80644	-1.27386	0.202715	NA
ENSSSCG00000043518	0.482552	-0.532904	4.03444	-0.132089	0.894914	NA
ENSSSCG00000062284	0.149552	-0.561077	4.08047	-0.137503	0.890633	NA
ENSSSCG00000060331	0.510636	1.23571	2.79465	0.442169	0.658367	NA
ENSSSCG00000039179	11.8948	0.482936	0.617845	0.781646	0.434422	0.71449
ENSSSCG00000061814	348.113	1.16886	0.650848	1.79591	0.0725093	0.298486
ENSSSCG00000060801	0.142313	-0.561077	4.08047	-0.137503	0.890633	NA
ENSSSCG00000051885	0.143642	-0.561077	4.08047	-0.137503	0.890633	NA
ENSSSCG00000060219	0.215857	1.36248	4.08047	0.333902	0.738454	NA
ENSSSCG00000047145	0.142313	-0.561077	4.08047	-0.137503	0.890633	NA
ENSSSCG00000047436	0.143642	-0.561077	4.08047	-0.137503	0.890633	NA
ENSSSCG00000056416	1.61658	-2.80671	1.93437	-1.45097	0.146788	NA
ENSSSCG00000053828	0.333	0.400704	4.08047	0.0982003	0.921773	NA
ENSSSCG00000054621	7.13143	1.79782	0.964264	1.86445	0.0622587	0.274942
ENSSSCG00000062911	0.177636	1.36248	4.08047	0.333902	0.738454	NA
ENSSSCG00000060408	0.215857	1.36248	4.08047	0.333902	0.738454	NA
ENSSSCG00000052729	0.142313	-0.561077	4.08047	-0.137503	0.890633	NA
ENSSSCG00000062161	0.183448	1.36248	4.08047	0.333902	0.738454	NA
ENSSSCG00000055336	0.537135	1.32221	2.80081	0.472083	0.636868	NA
ENSSSCG00000060395	0.177636	1.36248	4.08047	0.333902	0.738454	NA
ENSSSCG00000061578	0.977224	-0.586786	2.02953	-0.289124	0.772486	NA
ENSSSCG00000062696	841.151	-0.548133	0.953351	-0.574955	0.565322	0.799697
RAB14	720.779	0.0147526	0.371181	0.039745	0.968296	0.988726
ENSSSCG00000034749	1552.82	0.107019	0.242662	0.441022	0.659197	0.85298
GSN	19394	0.44281	0.571144	0.775304	0.43816	0.717906
STOM	4757.25	0.909152	0.426582	2.13125	0.0330686	0.194773
ENSSSCG00000038200	0.694085	1.82158	2.64629	0.688353	0.49123	NA
ENSSSCG00000005518	2298.5	0.414521	0.291387	1.42258	0.154858	0.437709
ENSSSCG00000005519	1.79042	-0.364641	1.99561	-0.182721	0.855017	NA
DAB2IP	1432.91	0.270905	0.300496	0.901526	0.367309	0.663019
OR1K1	0.359499	0.400704	4.08047	0.0982003	0.921773	NA
ENSSSCG00000041164	0.299104	-1.49468	4.03444	-0.370481	0.711024	NA
ENSSSCG00000058119	1.9473	0.722994	1.39182	0.519459	0.603441	NA
ENSSSCG00000048491	0.365409	0.400704	4.08047	0.0982003	0.921773	NA
ENSSSCG00000062052	3.45371	5.42739	3.92159	1.38398	0.166365	NA
ENSSSCG00000062930	0.215857	1.36248	4.08047	0.333902	0.738454	NA
ENSSSCG00000052639	0.35817	0.400704	4.08047	0.0982003	0.921773	NA
ENSSSCG00000046469	1.50491	-1.62744	1.93339	-0.841754	0.399926	NA
ENSSSCG00000056817	3.36146	-0.141387	1.23808	-0.114198	0.909081	NA
ENSSSCG00000061402	6.2659	1.40119	1.1257	1.24472	0.213233	0.514414
ENSSSCG00000053002	30.6579	-0.187948	0.437167	-0.429923	0.667252	0.8582
ENSSSCG00000056449	47.7489	0.000255191	0.358085	0.000712654	0.999431	0.999906
ENSSSCG00000047129	42.5441	-1.06284	0.636404	-1.67007	0.0949052	0.342036
ENSSSCG00000056634	0.149552	-0.561077	4.08047	-0.137503	0.890633	NA
ENSSSCG00000063161	330.088	0.200931	0.368726	0.544932	0.5858	0.812049
ENSSSCG00000048111	20.3455	-0.371157	0.823775	-0.450556	0.652309	0.849599
ENSSSCG00000018665	0.319949	0.400704	4.08047	0.0982003	0.921773	NA
AP4E1	632.406	0.0368803	0.152106	0.242465	0.80842	0.928013
SPPL2A	2433.88	-0.040194	0.326992	-0.12292	0.90217	0.966292
TRPM7	2162.98	-0.0291859	0.163125	-0.178918	0.858002	0.948888
ENSSSCG00000034352	1.56289	1.36713	1.52745	0.895038	0.370767	NA
USP8	2145.16	0.18689	0.281483	0.663947	0.506724	0.762477
GABPB1	401.86	-0.0158511	0.160155	-0.0989734	0.921159	0.970908
FBN1	4280.71	2.29035	0.603288	3.79645	0.000146782	0.00615717
DTWD1	386.399	0.558666	0.516775	1.08106	0.27967	0.585484
FAM227B	35.2693	0.380165	0.52097	0.729726	0.465558	0.736325
ENSSSCG00000056997	108.814	2.08305	0.938744	2.21898	0.026488	0.173328
COPS2	2768.48	0.865866	0.379376	2.28234	0.0224691	0.158534
SECISBP2L	1942.75	0.318247	0.194099	1.63961	0.101086	0.353876
ENSSSCG00000056133	18.6234	0.502531	0.764869	0.657016	0.511171	0.766001
CEP152	121.252	-0.168722	0.574856	-0.293503	0.769137	0.911397
HDC	252.697	5.00132	0.521006	9.59935	8.04474e-22	6.78293e-18
SLC27A2	186.169	-3.39303	1.82253	-1.86172	0.0626428	0.275952
ATP8B4	72.3725	-0.348258	0.709661	-0.490738	0.623612	0.834269
ADAM10	4772.77	0.130585	0.381999	0.341845	0.732467	0.894345
LIPC	33.4376	0.962867	0.357233	2.69535	0.00703157	0.0806928
ENSSSCG00000055556	1.25058	1.73971	1.97049	0.882879	0.377301	NA
ALDH1A2	1356.7	0.88886	0.556452	1.59737	0.110183	0.369445
AQP9	5.38771	1.60885	1.288	1.24911	0.211626	0.512858
POLR2M	1458.45	0.29737	0.286219	1.03896	0.298824	0.603343
ENSSSCG00000004598	905.924	2.27212	0.670305	3.38968	0.00069975	0.0187597
CGNL1	1189.14	0.959886	0.635468	1.51052	0.130911	0.402838
TCF12	1662.41	-0.111344	0.291167	-0.382405	0.702161	0.878466
ANKS6	526.967	-0.585377	0.4513	-1.29709	0.1946	0.491689
CORO2A	895.461	0.106832	0.746984	0.143018	0.886276	0.959695
TBC1D2	770.856	0.37535	0.73315	0.51197	0.608672	0.826335
GABBR2	19.1845	-0.32041	0.983497	-0.325787	0.744586	0.900146
PGAP4	1545.71	0.266053	0.557112	0.477557	0.632966	0.839061
RNF20	1673.7	-0.0784658	0.320291	-0.244983	0.80647	0.927218
GRIN3A	147.829	1.7176	0.659401	2.60479	0.00919315	0.0948159
TGFBR1	1844.92	0.163976	0.27181	0.603273	0.546327	0.788962
SMC2	818.809	0.110376	0.446631	0.24713	0.804808	0.92618
UNC13B	914.455	0.465687	0.419037	1.11133	0.266428	0.573896
ENSSSCG00000005307	4.04402	-1.54774	1.83041	-0.845571	0.397792	NA
ENSSSCG00000058191	3.42245	-1.71392	1.25528	-1.36537	0.172137	NA
ENSSSCG00000041181	0.215857	1.36248	4.08047	0.333902	0.738454	NA
ENSSSCG00000043390	1.18717	0.0318881	1.66476	0.0191547	0.984718	NA
ENSSSCG00000026960	685.912	0.00517049	0.297014	0.0174082	0.986111	0.994898
ENSSSCG00000058998	0.428269	-2.0203	3.99589	-0.505594	0.613142	NA
MNS1	206.041	-3.4759	1.09166	-3.18405	NA	NA
TEX9	78.707	-1.47492	0.792205	-1.86179	0.0626329	0.275952
RFX7	1019.47	-0.309855	0.141552	-2.18898	0.0285981	0.180791
ENSSSCG00000049979	0.143642	-0.561077	4.08047	-0.137503	0.890633	NA
NEDD4	409.594	0.493841	0.541262	0.912389	0.361564	0.658074
FAM214A	3583.68	-0.211855	0.327428	-0.647029	0.517613	0.770382
ENSSSCG00000053937	2615.91	0.589269	0.190117	3.09951	0.00193841	0.035942
ENSSSCG00000048649	0.658762	0.350283	2.76387	0.126736	0.899149	NA
MYO5C	2373.63	-0.487294	0.98285	-0.495797	0.620038	0.831665
GNB5	683.127	1.42931	0.810515	1.76345	0.077824	0.309173
ENSSSCG00000004623	0.355272	2.16432	4.04679	0.534824	0.592772	NA
MAPK6	2540.92	1.44583	0.624688	2.31449	0.020641	0.150425
LEO1	855.692	0.213428	0.459998	0.463975	0.642666	0.844273
TMOD3	3185.01	0.990561	0.435188	2.27617	0.0228359	0.160184
TMOD2	291.134	1.72193	1.13048	1.52318	0.127714	0.39816
LYSMD2	133.882	1.1989	0.634604	1.88921	0.058864	0.267188
SCG3	43.0846	1.42262	0.725122	1.9619	0.049774	0.243994
DMXL2	608.881	0.888465	0.518377	1.71394	0.0865405	0.326035
GLDN	90.9079	3.09253	0.912185	3.39025	0.000698301	0.0187507
TNFAIP8L3	944.031	2.33484	1.04873	2.22635	0.0259906	0.171538
PRTG	4.42261	1.7051	1.74121	0.979265	0.327449	NA
PYGO1	252.534	-0.261051	0.796968	-0.327556	0.743248	0.89938
DNAAF4	34.9303	-3.60427	1.54938	-2.32626	NA	NA
ENSSSCG00000054223	7.69002	-1.57547	0.907964	-1.73517	0.0827113	0.319313
CCPG1	2823.93	0.519806	0.407564	1.2754	0.202169	0.501494
PIGB	333.275	-0.188868	0.411266	-0.459236	0.646065	0.84605
RAB27A	1454.45	0.327485	0.689786	0.474763	0.634956	0.840402
RSL24D1	1171.46	-0.234241	0.167896	-1.39516	0.162968	0.449572
ENSSSCG00000059207	0.177636	1.36248	4.08047	0.333902	0.738454	NA
UNC13C	11.4655	0.466104	0.617709	0.754569	0.450507	0.725708
WDR72	1.56545	-3.88881	3.93137	-0.989172	0.322579	NA
ENSSSCG00000004656	337.898	0.967455	0.806505	1.19957	0.230308	0.53472
ENSSSCG00000024660	34.3627	0.140429	0.561471	0.25011	0.802503	0.925452
ENSSSCG00000046774	0.532908	2.74478	4.00097	0.686027	0.492696	NA
ENSSSCG00000059295	70.3916	0.394682	0.394774	0.999768	0.317423	0.620816
ENSSSCG00000052887	115.677	-0.149934	0.376743	-0.397974	0.69065	0.872034
ENSSSCG00000056735	5.48116	0.765401	0.779144	0.982362	0.325922	0.627848
ENSSSCG00000062177	3.01192	-0.755673	1.25312	-0.603032	0.546487	NA
ENSSSCG00000062439	4.05339	-2.11397	1.31116	-1.61228	0.1069	NA
ENSSSCG00000047357	1.4049	-1.38069	2.13722	-0.646023	0.518264	NA
ENSSSCG00000057596	37.1209	-1.17597	0.458778	-2.56327	0.0103692	0.102164
ENSSSCG00000046276	0.931666	-0.62996	2.09399	-0.300841	0.763535	NA
ENSSSCG00000059103	326.254	0.444747	0.868929	0.511833	0.608768	0.826335
ENSSSCG00000062614	0.177636	1.36248	4.08047	0.333902	0.738454	NA
ENSSSCG00000053433	0.711567	-2.75219	3.96067	-0.694881	0.48713	NA
ENSSSCG00000058522	0.142313	-0.561077	4.08047	-0.137503	0.890633	NA
ENSSSCG00000046402	0.355272	2.16432	4.04679	0.534824	0.592772	NA
ENSSSCG00000042551	4.6385	-1.31812	0.968526	-1.36095	0.173529	NA
ENSSSCG00000057375	3.56174	0.487447	1.66125	0.293422	0.769199	NA
ENSSSCG00000052402	4.63613	-0.731159	1.12777	-0.648323	0.516776	NA
ENSSSCG00000057513	0.548857	1.33836	2.79575	0.478712	0.632144	NA
ENSSSCG00000063504	5.58526	-0.45796	0.946794	-0.483695	0.628602	0.836727
ENSSSCG00000059306	0.431713	2.40925	4.02526	0.598534	0.549484	NA
SNORA70	0.149552	-0.561077	4.08047	-0.137503	0.890633	NA
ssc-mir-628	0.365409	0.400704	4.08047	0.0982003	0.921773	NA
GALK2	771.803	-0.503652	0.330243	-1.5251	0.127235	0.397323
MYO5A	1201.97	0.779773	0.537399	1.45101	0.146776	0.426813
ALG2	543.642	-0.368707	0.346503	-1.06408	0.287293	0.592688
SEC61B	1513.41	-0.111058	0.250688	-0.443012	0.657757	0.852032
NR4A3	59.5831	1.52501	1.01237	1.50637	0.131972	0.404404
STX17	694.866	0.24202	0.166428	1.4542	0.145891	0.425118
ERP44	2241.32	0.550234	0.24491	2.24668	0.0246608	0.166876
INVS	734.086	0.594211	0.472756	1.25691	0.208787	0.50893
CYP19A1	13.4551	2.59861	2.65067	0.980359	0.326909	0.628596
TEX10	543.418	-0.31411	0.320885	-0.978885	0.327637	0.629049
ENSSSCG00000055769	140.958	0.132845	0.52648	0.252327	0.800788	0.925279
MSANTD3-TMEFF1	44.7064	0.0332291	0.819953	0.0405256	0.967674	0.988723
CAVIN4	6.03225	0.221723	0.982084	0.225768	0.821382	0.933471
PLPPR1	21.5972	-1.81323	1.13066	-1.60369	0.108783	0.36677
ENSSSCG00000042524	7.71353	-0.315981	1.39904	-0.225855	0.821314	0.933471
ENSSSCG00000038171	137.506	-3.01214	1.5425	-1.95276	0.050848	0.247032
ENSSSCG00000005398	335.474	-4.87532	1.50685	-3.23545	0.00121452	0.0266326
BAAT	0.788024	-0.223739	2.75221	-0.0812941	0.935208	NA
MRPL50	401.797	-0.175504	0.245546	-0.714752	0.474763	0.743263
ZNF189	434.412	-0.199054	0.251275	-0.792178	0.428257	0.710028
ALDOB	2.40498	0.377013	2.56158	0.14718	0.88299	NA
GALNT12	933.86	-0.893123	0.717911	-1.24406	0.213478	0.514858
COL15A1	5418.11	1.05482	0.630118	1.674	0.0941301	0.340812
ALDH1B1	519.702	0.308097	0.349836	0.88069	0.378486	0.672046
IGFBPL1	1.1747	-3.47288	3.31679	-1.04706	0.295072	NA
ENSSSCG00000040711	4.5387	0.12294	1.00806	0.121957	0.902933	NA
CCDC180	196.575	-7.49197	1.87374	-3.9984	6.3773e-05	0.00336549
ENSSSCG00000053078	779.897	-0.147209	0.334874	-0.439594	0.660231	0.85314
NCBP1	801.692	-0.158039	0.257273	-0.614285	0.539027	0.784037
TSTD2	851.025	-0.017827	0.161818	-0.110167	0.912277	0.968407
XPA	173.95	0.449535	0.242255	1.85562	0.0635072	0.278024
TRMO	464.327	-0.0444882	0.257104	-0.173036	0.862623	0.951023
ENSSSCG00000062892	4106.24	0.0316201	0.296995	0.106467	0.915212	0.969133
TRIM14	170.83	-0.629628	0.30401	-2.07108	0.0383515	0.211416
ENSSSCG00000022044	0.576492	-2.44758	3.91412	-0.625319	0.531762	NA
ENSSSCG00000059160	0.142313	-0.561077	4.08047	-0.137503	0.890633	NA
PHF24	34.1328	1.7154	1.53776	1.11551	0.26463	0.572293
DNAJB5	472.538	1.60686	0.996076	1.61319	0.106703	0.363287
VCP	7977.59	-0.0227897	0.209175	-0.10895	0.913242	0.968645
C9orf131	1.33195	-2.48842	1.9175	-1.29774	0.194376	NA
FANCG	420.772	-0.755753	0.487517	-1.55021	0.121091	0.387811
PIGO	1048.71	-0.416617	0.320834	-1.29854	0.194101	0.491165
STOML2	1131.34	-0.010201	0.225014	-0.0453349	0.96384	0.986779
FAM214B	587.967	0.906254	0.292403	3.09933	0.00193958	0.035942
RUSC2	1100.25	1.48084	1.15819	1.27859	0.201042	0.499632
FAM166B	162.993	-4.08818	1.43216	-2.85456	NA	NA
TESK1	963.057	0.176203	0.543646	0.324114	0.745852	0.900452
ENSSSCG00000005311	53.1325	0.0582862	0.812479	0.0717387	0.94281	0.979696
SIT1	36.8876	-0.373373	0.362414	-1.03024	0.302899	0.60713
CCDC107	166.175	0.383156	0.762983	0.502182	0.615539	0.829326
ARHGEF39	126.48	0.055115	0.681465	0.0808772	0.93554	0.977266
ENSSSCG00000059309	90.4345	-0.581009	0.44651	-1.30122	0.193182	0.489869
ENSSSCG00000005316	22590.3	2.73017	1.49898	1.82135	0.0685536	0.289656
TLN1	11971.4	0.839787	0.79627	1.05465	0.291585	0.59721
CREB3	845.709	0.220758	0.326039	0.677091	0.498348	0.757153
GBA2	933.881	-0.244484	0.183654	-1.33122	0.183117	0.477633
RGP1	342.953	0.407025	0.310524	1.31077	0.189936	0.486171
NPR2	605.996	1.3673	0.944949	1.44696	0.147909	0.427748
SPAG8	590.22	-0.617701	0.449836	-1.37317	0.1697	0.457937
FAM221B	47.0181	-0.987598	0.847886	-1.16478	0.244109	0.550764
TMEM8B	226.632	0.0887002	0.506444	0.175143	0.860967	0.950225
ENSSSCG00000050197	0.142313	-0.561077	4.08047	-0.137503	0.890633	NA
RECK	433.525	1.27672	0.837342	1.52472	0.127328	0.397396
GLIPR2	1307.01	-0.0452146	0.335865	-0.134621	0.892911	0.961505
CLTA	2765.62	0.0865825	0.215763	0.401285	0.68821	0.870666
GNE	1087.46	1.04451	0.465062	2.24597	0.0247062	0.166982
RNF38	3019.91	0.409618	0.31763	1.2896	0.197188	0.494671
MELK	197.463	0.671737	1.10708	0.606766	0.544006	0.787693
PAX5	5.0264	0.193631	1.68792	0.114716	0.90867	0.967844
ZCCHC7	521.359	-0.0706206	0.291455	-0.242304	0.808545	0.928015
GRHPR	562.709	-0.0404209	0.225758	-0.179045	0.857902	0.948888
ZBTB5	409.303	-0.408627	0.210562	-1.94065	0.0523005	0.249784
POLR1E	431.733	0.150807	0.429724	0.35094	0.725634	0.890519
FBXO10	60.4634	0.1461	0.5854	0.249573	0.802918	0.925722
ENSSSCG00000058091	589.317	-0.0770229	0.290348	-0.265278	0.790795	0.921327
FRMPD1	15.9368	-0.352389	0.788614	-0.446845	0.654987	0.850404
TRMT10B	281.321	-0.274442	0.211602	-1.29697	0.194641	0.491713
EXOSC3	96.019	-0.244897	0.334441	-0.732257	0.464012	0.735467
DCAF10	1004.14	0.212134	0.284088	0.746721	0.455232	0.72857
SLC25A51	1434.98	0.413094	0.347961	1.18719	0.235154	0.540541
ENSSSCG00000005358	297.575	1.11408	0.391931	2.84253	0.00447566	0.0607185
FOXE1	277.86	0.394878	0.948988	0.416105	0.677333	0.864743
ENSSSCG00000055084	49.5795	2.26722	1.12436	2.01644	0.0437535	0.227721
ENSSSCG00000058329	38.5527	1.66863	0.740948	2.25203	0.0243205	0.16557
CCIN	1.29909	1.81202	2.48233	0.729965	0.465411	NA
ENSSSCG00000055591	0.143642	-0.561077	4.08047	-0.137503	0.890633	NA
ENSSSCG00000055284	0.535806	1.32222	2.80207	0.471874	0.637017	NA
ENSSSCG00000059392	6.88497	1.21614	1.31832	0.922496	0.35627	0.654229
ENSSSCG00000053578	0.333	0.400704	4.08047	0.0982003	0.921773	NA
ENSSSCG00000062097	0.285956	-1.43824	4.03945	-0.356049	0.721804	NA
ENSSSCG00000056356	8.12943	0.706929	0.803397	0.879925	0.3789	0.672284
ENSSSCG00000061681	0.504726	1.2356	2.80066	0.441182	0.659081	NA
ENSSSCG00000052960	0.215857	1.36248	4.08047	0.333902	0.738454	NA
ENSSSCG00000056508	0.863427	3.41919	3.96607	0.86211	0.388627	NA
ENSSSCG00000042369	234.502	-0.398623	0.328571	-1.2132	0.225053	0.52883
ENSSSCG00000055191	0.143642	-0.561077	4.08047	-0.137503	0.890633	NA
ENSSSCG00000053898	0.142313	-0.561077	4.08047	-0.137503	0.890633	NA
ENSSSCG00000055263	0.284627	-1.43241	4.03998	-0.354559	0.72292	NA
ENSSSCG00000042952	1.74786	-0.919733	2.71521	-0.338733	0.734811	NA
ENSSSCG00000049199	46.3026	-0.98853	0.893581	-1.10626	0.268616	0.576367
ENSSSCG00000049366	1.90987	2.45342	1.64404	1.49231	0.135619	NA
ENSSSCG00000041432	1.7272	-0.0454272	1.95548	-0.0232307	0.981466	NA
RNase_MRP	1.57855	-0.821021	1.51171	-0.543106	0.587057	NA
ENSSSCG00000063066	219.422	0.985836	1.555	0.63398	0.526094	0.775901
NANS	822.278	-0.214764	0.658156	-0.326311	0.744189	0.900026
DACT2	9.84001	3.35155	1.79238	1.86989	0.0614984	0.273714
ENSSSCG00000037372	148.554	-0.23353	0.209589	-1.11423	0.265181	0.572862
PSMB1	1932.11	0.334433	0.189678	1.76316	0.0778732	0.309238
PNLDC1	0.760389	3.24855	2.44733	1.32739	0.184381	NA
SMOC2	2083.69	1.05469	0.97078	1.08643	0.277287	0.583454
MRPL18	602.627	-0.286057	0.20157	-1.41915	0.155856	0.439426
TCP1	1595.41	-0.456384	0.223544	-2.04159	0.0411926	0.220483
ACAT2	1024.29	0.163405	0.912789	0.179017	0.857924	0.948888
SNX9	1834.39	0.668976	0.316143	2.11606	0.0343401	0.198657
WTAP	1967.13	-0.0332063	0.20855	-0.159225	0.873492	0.955526
SOD2	1380.44	-0.41367	0.392191	-1.05477	0.291532	0.59721
FNDC1	469.931	-2.58013	1.37422	-1.87753	0.0604461	0.27096
DYNLT1	648.27	0.320273	0.322719	0.992423	0.320991	0.623675
TMEM181	993.926	-0.374078	0.341383	-1.09577	0.273179	0.580629
ENSSSCG00000031776	219.791	-0.170746	0.251401	-0.679179	0.497024	0.756369
ENSSSCG00000024019	241.68	0.284874	0.242734	1.1736	0.240554	0.546252
SERAC1	281.79	-0.0480563	0.155278	-0.309485	0.756953	0.905953
SYNJ2	1450.49	1.50299	0.685114	2.19378	0.0282514	0.179166
ENSSSCG00000004017	59.4812	-2.67152	0.976487	-2.73585	0.00622199	0.0748369
ENSSSCG00000004016	14.6682	1.45327	0.790528	1.83835	0.0660107	0.283819
AFDN	3139	0.307028	0.403237	0.761408	0.446413	0.723856
ERMARD	511.747	-0.190384	0.128255	-1.48442	0.137698	0.41363
DYNLT2	4.16215	-0.755228	0.966763	-0.781192	0.434689	NA
PHF10	1014.82	-0.154941	0.395652	-0.39161	0.695346	0.874554
C6orf120	945.298	0.0223047	0.315423	0.0707135	0.943626	0.979946
WDR27	83.1994	-1.35219	0.671101	-2.01488	0.0439172	0.22808
THBS2	1502.74	1.90122	0.857933	2.21604	0.0266885	0.17437
FAM120B	1477.05	-0.325795	0.162971	-1.9991	0.0455977	0.232441
ENSSSCG00000049216	5.90748	-0.840991	0.736207	-1.14233	0.253317	0.55997
DLL1	258.938	0.252204	0.525849	0.479613	0.631503	0.838308
TAGAP	95.7407	-0.355599	0.451764	-0.787135	0.431203	0.712251
RSPH3	160.336	-1.35833	0.855834	-1.58714	0.112482	0.373088
EZR	17153.1	0.209526	0.503403	0.416221	0.677249	0.864743
SYTL3	84.6758	0.779307	0.863445	0.902556	0.366762	0.66253
QKI	3104.55	0.718397	0.449717	1.59744	0.110167	0.369445
PACRG	126.019	-4.42912	1.37309	-3.22566	0.00125683	0.0273289
ENSSSCG00000047165	0.142313	-0.561077	4.08047	-0.137503	0.890633	NA
PRKN	115.41	0.339877	0.862579	0.394025	0.693563	0.87365
ENSSSCG00000053549	0.359499	0.400704	4.08047	0.0982003	0.921773	NA
AGPAT4	166.461	1.20882	0.447048	2.70401	0.00685076	0.079672
MAP3K4	1100.07	-0.241483	0.205696	-1.17398	0.240404	0.546252
PLG	0.215857	1.36248	4.08047	0.333902	0.738454	NA
SLC22A3	80.7991	2.09975	0.914529	2.29599	0.0216764	0.155412
ENSSSCG00000004024	2276.78	-0.0917916	0.279152	-0.328823	0.742289	0.898805
RPS6KA2	337.783	0.750969	1.02086	0.735625	0.461959	0.733937
ENSSSCG00000032916	979.31	-0.301231	0.335363	-0.898224	0.369066	0.664211
SFT2D1	1232.57	-0.0800413	0.494222	-0.161954	0.871342	0.954634
PDE10A	116.958	1.56863	1.25977	1.24517	NA	NA
ZDHHC14	224.093	0.903142	0.763449	1.18298	0.236819	0.542371
ENSSSCG00000060508	74.9707	0.137798	0.303167	0.454528	0.649449	0.847921
ARID1B	2117.36	-0.0434674	0.167858	-0.258954	0.795671	0.923174
SLC22A2	25.5458	-3.13745	1.68766	-1.85905	NA	NA
SLC22A1	0.215857	1.36248	4.08047	0.333902	0.738454	NA
IGF2R	3674.81	0.228322	0.352191	0.648289	0.516798	0.769507
ENSSSCG00000051789	0.682363	1.80957	2.64944	0.683002	0.494605	NA
UNC93A	173.033	2.15794	0.980255	2.2014	0.0277075	0.177526
ENSSSCG00000032403	3.35901	-0.612741	1.21987	-0.502301	0.615456	NA
CCR6	13.2198	-1.06236	0.77585	-1.36929	0.17091	0.459365
CEP43	361.588	-0.700817	0.398755	-1.75751	0.0788302	0.311533
ENSSSCG00000038527	5.54026	-1.41587	0.933556	-1.51664	0.129359	0.400326
ENSSSCG00000059431	2.97279	4.18052	1.81504	2.30326	0.021264	NA
ENSSSCG00000062590	28.0942	-1.16757	0.698756	-1.67093	0.094735	0.341858
ENSSSCG00000048769	229.862	-0.0838701	0.212302	-0.39505	0.692806	0.873348
ENSSSCG00000053918	3.6466	-0.876788	2.50256	-0.350357	0.726071	NA
ENSSSCG00000054333	1.78452	0.601358	2.02058	0.297616	0.765996	NA
ENSSSCG00000047676	36.3987	0.869522	0.701733	1.23911	0.215306	0.516753
ENSSSCG00000047753	16.5025	0.0647868	0.899843	0.0719979	0.942604	0.979612
ENSSSCG00000043814	5.12234	-3.03463	1.47658	-2.05518	0.0398619	0.216766
ENSSSCG00000048885	28.5521	-1.18354	1.71673	-0.689416	0.490561	0.753263
ENSSSCG00000062746	1.07161	1.45045	2.52224	0.575063	0.565249	NA
ENSSSCG00000062461	4.98927	-0.574923	1.79147	-0.320922	0.748269	0.902192
ENSSSCG00000036448	6.80077	3.41765	1.91139	1.78805	0.0737686	0.301206
ENSSSCG00000061338	0.509051	-0.505652	2.82172	-0.1792	0.857781	NA
ENSSSCG00000052194	0.498914	1.20254	4.04678	0.29716	0.766344	NA
ENSSSCG00000054024	2.69143	-2.63175	1.4636	-1.79813	0.0721563	NA
ENSSSCG00000050646	3.8382	-0.209638	1.23297	-0.170026	0.864989	NA
ENSSSCG00000058194	0.972545	-0.553354	2.1043	-0.262963	0.792579	NA
ENSSSCG00000053277	2.21426	0.613797	1.15353	0.532102	0.594655	NA
ENSSSCG00000059587	3.30279	-0.45523	1.19499	-0.380949	0.703241	NA
ENSSSCG00000063447	4.50733	-2.19243	1.43883	-1.52376	0.12757	NA
ENSSSCG00000058272	0.359499	0.400704	4.08047	0.0982003	0.921773	NA
ENSSSCG00000053023	4.46437	-1.27449	1.08804	-1.17136	0.241455	NA
ENSSSCG00000060777	0.908515	2.2958	2.60261	0.882114	0.377715	NA
ENSSSCG00000052920	7.09497	1.05127	0.896235	1.17299	0.240801	0.546367
ENSSSCG00000046349	10.5192	0.591671	0.74626	0.792849	0.427866	0.709961
ENSSSCG00000061525	14.7362	0.771354	1.15492	0.667883	0.504208	0.760847
ENSSSCG00000046713	0.215857	1.36248	4.08047	0.333902	0.738454	NA
ENSSSCG00000057897	0.685358	0.415194	2.19971	0.188749	0.850289	NA
ENSSSCG00000050351	85.7867	-3.27973	1.02562	-3.19781	0.00138477	0.0289998
ENSSSCG00000018530	4.98218	-0.662604	0.802519	-0.825656	0.408999	0.695749
ssc-mir-9824	0.142313	-0.561077	4.08047	-0.137503	0.890633	NA
ssc-mir-9831	0.215857	1.36248	4.08047	0.333902	0.738454	NA
COL12A1	9493.88	2.3819	0.948775	2.5105	0.0120561	0.111626
ME1	304.122	3.04823	0.860462	3.54255	0.000396276	0.0127771
SH3BGRL2	12585.5	0.62212	0.666815	0.932972	0.350834	0.649719
LCA5	162.161	-1.44872	0.848521	-1.70734	0.0877585	0.328947
ENSSSCG00000046076	0.215857	1.36248	4.08047	0.333902	0.738454	NA
ENSSSCG00000004470	1357.78	-0.543172	0.32746	-1.65874	0.0971678	0.346699
PHIP	1101.47	-0.579602	0.36378	-1.59328	0.111098	0.37098
MYO6	2983.55	0.696999	0.598182	1.1652	0.24394	0.550724
SENP6	2379.04	0.00189081	0.314368	0.00601466	0.995201	0.998339
RWDD2A	210.255	0.136164	0.202261	0.67321	0.500813	0.758664
PGM3	608.517	-0.0631995	0.511096	-0.123655	0.901589	0.965946
DOP1A	1161.8	-0.21849	0.373482	-0.585007	0.558543	0.796306
UBE3D	87.1965	-1.02576	0.31592	-3.2469	0.00116669	0.0258188
ENSSSCG00000053568	0.333	0.400704	4.08047	0.0982003	0.921773	NA
TPBG	826.991	0.233312	0.568038	0.410734	0.681268	0.866863
IBTK	1468.99	0.255846	0.312212	0.819463	0.412522	0.699362
IRAK1BP1	217.581	-0.967864	0.359959	-2.68882	0.00717054	0.0815903
MEI4	0.642797	-1.05448	3.97639	-0.265184	0.790868	NA
RWDD1	977.342	0.384861	0.22334	1.7232	0.0848517	0.323185
ENSSSCG00000062898	0.365409	0.400704	4.08047	0.0982003	0.921773	NA
SNAP91	1.94217	-1.16042	1.7057	-0.680318	0.496303	NA
PRSS35	21.0067	4.30082	0.914431	4.70327	2.56025e-06	0.000326402
FILIP1	490.872	1.20031	0.794027	1.51168	0.130616	0.402529
TMEM30A	3116.65	0.150922	0.160031	0.94308	0.34564	0.644963
COX7A2	1001.07	0.100825	0.199228	0.506077	0.612803	0.828152
ENSSSCG00000053516	1.68146	0.874127	2.49165	0.350822	0.725722	NA
NT5DC1	911.646	0.63139	0.565209	1.11709	0.263956	0.571605
COL10A1	11.5453	5.28973	1.44791	3.65335	0.00025884	0.00932655
TSPYL1	986.407	-0.162639	0.325727	-0.499311	0.61756	0.830655
ENSSSCG00000004441	755.822	0.64059	0.502788	1.27408	0.202637	0.501993
CALHM6	10.4726	-0.0788551	0.6245	-0.126269	0.899519	0.964861
CALHM5	187.327	2.04502	0.956968	2.13698	0.0325998	0.19365
CALHM4	0.934855	1.15485	3.82026	0.302296	0.762426	NA
TENT5A	1579.34	-1.53637	0.423149	-3.63081	0.000282532	0.0099257
BCKDHB	334.548	-0.531681	0.223428	-2.37965	0.0173289	0.136287
TTK	227.433	0.673761	1.10643	0.608949	0.542558	0.78688
ELOVL4	87.7967	1.39956	0.476577	2.93668	0.00331742	0.0504572
ENSSSCG00000049571	0.428269	-2.0203	3.99589	-0.505594	0.613142	NA
HTR1B	110.523	1.53857	0.825748	1.86325	0.0624274	0.275363
ENSSSCG00000047800	417.114	0.302857	0.706183	0.428864	0.668022	0.858708
ENSSSCG00000059566	1.10884	-1.0226	2.76208	-0.370228	0.711212	NA
ENSSSCG00000058663	4.2714	0.30447	0.925927	0.328827	0.742286	NA
ENSSSCG00000062560	610.665	0.259865	0.233375	1.11351	0.265491	0.573236
ENSSSCG00000050897	0.177636	1.36248	4.08047	0.333902	0.738454	NA
ENSSSCG00000042605	0.142313	-0.561077	4.08047	-0.137503	0.890633	NA
ENSSSCG00000063246	0.428269	-2.0203	3.99589	-0.505594	0.613142	NA
ENSSSCG00000054792	0.441418	-2.05989	3.99351	-0.51581	0.605987	NA
ENSSSCG00000060383	0.284627	-1.43241	4.03998	-0.354559	0.72292	NA
ENSSSCG00000057254	1.26766	-1.14964	2.0073	-0.57273	0.566827	NA
ENSSSCG00000045384	0.361084	2.18449	4.04488	0.540065	0.589152	NA
ENSSSCG00000053627	0.965404	-0.566139	2.02406	-0.279705	0.779703	NA
ENSSSCG00000063024	0.925397	-1.85779	3.83805	-0.484046	0.628354	NA
ENSSSCG00000056387	1.15044	0.771705	1.90988	0.40406	0.686169	NA
ENSSSCG00000054452	0.855209	-3.01733	3.66831	-0.822538	0.410771	NA
ENSSSCG00000054905	0.284627	-1.43241	4.03998	-0.354559	0.72292	NA
ENSSSCG00000061044	0.142313	-0.561077	4.08047	-0.137503	0.890633	NA
ENSSSCG00000052113	0.728702	-2.78382	2.40339	-1.15829	0.246747	NA
ENSSSCG00000055630	0.177636	1.36248	4.08047	0.333902	0.738454	NA
ENSSSCG00000050407	1.22688	0.872021	1.93634	0.450344	0.652462	NA
ENSSSCG00000053341	2.87181	-0.312993	1.98347	-0.157801	0.874614	NA
ENSSSCG00000057027	0.142313	-0.561077	4.08047	-0.137503	0.890633	NA
ENSSSCG00000054079	0.462263	-0.470633	4.03998	-0.116494	0.907261	NA
ENSSSCG00000059005	0.67812	0.447053	2.76499	0.161683	0.871555	NA
ENSSSCG00000051809	68.0449	0.502492	0.908603	0.553038	0.580237	0.808506
ENSSSCG00000061057	98.793	1.11488	0.791732	1.40815	0.159086	0.443269
ENSSSCG00000055281	0.149552	-0.561077	4.08047	-0.137503	0.890633	NA
ENSSSCG00000054854	0.544532	2.7734	3.88024	0.71475	0.474764	NA
UBE2J1	1442.57	0.559394	0.211196	2.64869	0.00808045	0.0875149
RRAGD	186.924	-0.725193	0.467436	-1.55143	0.1208	0.387417
ANKRD6	320.395	-1.23978	0.651735	-1.90227	0.0571354	0.262099
ENSSSCG00000004324	388.496	-0.199902	0.268711	-0.743931	0.456918	0.730194
MDN1	1422.63	-1.22173	0.276064	-4.42551	9.62131e-06	0.000876996
MAP3K7	1106.62	0.134893	0.238082	0.566583	0.570997	0.802996
NT5E	329.633	2.77944	1.2754	2.17926	0.0293122	0.18273
SNX14	1783.55	-0.00260253	0.260361	-0.00999583	0.992025	0.997166
ENSSSCG00000004294	4221.26	-0.381355	0.29107	-1.31018	0.190134	0.486234
RNGTT	856.843	0.192775	0.22331	0.863264	0.387993	0.678916
PNRC1	4008.55	0.433254	0.417041	1.03887	0.298863	0.603343
SRSF12	46.9831	-0.48389	0.488868	-0.989816	0.322264	0.624834
PM20D2	1182.08	-0.681173	0.378707	-1.79868	0.0720688	0.297721
GABRR2	3.85972	3.59799	1.76504	2.03847	0.0415031	NA
CYB5R4	284.687	0.390186	0.300646	1.29782	0.194348	0.491504
MRAP2	2669.98	1.96143	1.46655	1.33744	0.181078	0.474223
CEP162	476.934	-0.0199172	0.268568	-0.0741607	0.940883	0.978966
TBX18	68.5432	2.00099	1.83617	1.08976	NA	NA
ENSSSCG00000051834	116.119	-0.0758062	0.207103	-0.366032	0.714341	0.885536
B3GAT2	23.3325	-0.135917	0.418598	-0.324696	0.745412	0.900356
OGFRL1	415.804	0.148363	0.396175	0.374489	0.708041	0.881874
HTR1E	4.54069	2.73649	1.94774	1.40496	0.160034	NA
CGA	1.00374	1.29855	2.71465	0.478349	0.632402	NA
ZNF292	1179.32	-0.0519485	0.2298	-0.22606	0.821155	0.933471
SMIM8	91.5124	0.315411	0.228874	1.3781	0.168174	0.456081
ENSSSCG00000055021	1.80957	1.03501	1.41385	0.732047	0.46414	NA
ENSSSCG00000004302	125.256	-3.19868	1.41452	-2.26131	0.0237399	0.163755
SLC35A1	1116.29	0.276237	0.260151	1.06183	0.288311	0.593771
RARS2	378.972	-0.163171	0.451577	-0.361335	0.717849	0.886759
ORC3	505.133	-0.138365	0.244133	-0.566761	0.570876	0.802893
ENSSSCG00000004307	1012.22	0.0103778	0.21603	0.0480385	0.961686	0.986031
SPACA1	3.50951	-0.405743	1.34349	-0.302007	0.762646	NA
CNR1	6.58714	0.852056	0.971094	0.877419	0.380259	0.673138
ENSSSCG00000050040	1.99445	1.23563	1.54175	0.80145	0.422871	NA
CASP8AP2	557.732	-0.117435	0.202608	-0.579618	0.562172	0.798039
GJA10	4.53243	-0.10865	0.936689	-0.115994	0.907657	NA
BACH2	21.2258	0.834209	0.844414	0.987914	0.323195	0.625793
ENSSSCG00000044269	0.215857	1.36248	4.08047	0.333902	0.738454	NA
RIMS1	129.704	2.14907	1.79943	1.1943	0.23236	0.537027
KCNQ5	481.302	-0.667066	0.717476	-0.929739	0.352506	0.6514
ENSSSCG00000046325	0.47083	-0.505771	2.86268	-0.176677	0.859762	NA
ENSSSCG00000053554	0.327188	0.400704	4.08047	0.0982003	0.921773	NA
ENSSSCG00000058051	0.142313	-0.561077	4.08047	-0.137503	0.890633	NA
OOEP	0.35817	0.400704	4.08047	0.0982003	0.921773	NA
EPHA7	68.9231	1.0097	1.17177	0.861689	0.388858	0.679797
ENSSSCG00000057761	1.14171	-0.00454824	2.01398	-0.00225833	0.998198	NA
ENSSSCG00000029003	265.883	-0.0568976	0.212704	-0.267496	0.789087	0.920645
ENSSSCG00000057380	0.509051	-0.505652	2.82172	-0.1792	0.857781	NA
ENSSSCG00000051452	0.950469	-1.83006	2.03366	-0.899885	0.368181	NA
ENSSSCG00000057615	3.23183	-2.74927	2.35812	-1.16587	0.243667	NA
GJB7	111.151	-6.86308	1.76475	-3.88898	0.000100667	0.00471543
ENSSSCG00000052938	1.71441	0.482317	2.57136	0.187573	0.851212	NA
ENSSSCG00000058397	90.4092	-0.675269	0.700644	-0.963783	0.335155	0.635594
ENSSSCG00000061089	28.5575	-1.52257	0.586773	-2.59483	0.00946391	0.0967798
ENSSSCG00000042663	14.115	-0.775847	0.786261	-0.986754	0.323763	0.62639
ENSSSCG00000061122	1.20915	-1.25008	3.73374	-0.334806	0.737772	NA
ENSSSCG00000060021	0.768606	-1.51666	2.68819	-0.564192	0.572623	NA
ENSSSCG00000050380	2.06116	-0.312718	1.48957	-0.209938	0.833716	NA
ENSSSCG00000056220	0.365409	0.400704	4.08047	0.0982003	0.921773	NA
ENSSSCG00000055243	0.327188	0.400704	4.08047	0.0982003	0.921773	NA
ENSSSCG00000062121	1.16253	1.52321	3.74494	0.406738	0.6842	NA
ENSSSCG00000041858	0.431713	2.40925	4.02526	0.598534	0.549484	NA
ENSSSCG00000060869	0.907027	1.04545	2.11075	0.495296	0.620391	NA
ENSSSCG00000057321	1.2888	1.78211	1.98197	0.899161	0.368567	NA
ENSSSCG00000063094	4.6691	-0.496832	1.09347	-0.454362	0.649569	NA
ENSSSCG00000045140	1.82785	-1.89715	1.61021	-1.1782	0.238718	NA
ENSSSCG00000060394	12.3853	-0.147401	0.666404	-0.221189	0.824946	0.934633
ENSSSCG00000051930	9.63529	0.281662	0.584937	0.481525	0.630143	0.837691
ENSSSCG00000060291	3.86574	1.4619	1.35975	1.07512	0.28232	NA
ENSSSCG00000058267	0.865909	2.21752	2.58993	0.856208	0.391883	NA
ENSSSCG00000053987	0.366896	2.20447	4.04301	0.545253	0.585579	NA
ENSSSCG00000048267	0.143642	-0.561077	4.08047	-0.137503	0.890633	NA
ENSSSCG00000053017	1.73213	-4.03504	1.9826	-2.03523	0.0418282	NA
ENSSSCG00000061618	1.98796	-1.37262	2.51448	-0.545884	0.585145	NA
ENSSSCG00000058739	0.215857	1.36248	4.08047	0.333902	0.738454	NA
ENSSSCG00000060016	0.355272	2.16432	4.04679	0.534824	0.592772	NA
ENSSSCG00000044841	917.882	0.665922	0.415666	1.60206	0.109142	0.367358
ENSSSCG00000038663	12.5199	-4.42416	2.02377	-2.18609	0.0288087	0.18157
ENSSSCG00000037982	0.842149	-0.193032	2.76873	-0.0697187	0.944418	NA
ENSSSCG00000019135	0.470733	-0.482275	4.03893	-0.119407	0.904953	NA
SMAP1	445.187	0.0517474	0.188797	0.27409	0.784015	0.918062
FREM1	11.8985	1.03587	0.753906	1.37401	0.169439	0.457893
CER1	0.42694	-2.01623	3.99614	-0.504544	0.613879	NA
ZDHHC21	1023.99	0.291496	0.604139	0.482499	0.629452	0.837103
SH3GL2	24.8084	0.37569	0.678118	0.554019	0.579566	0.808128
CNTLN	305.713	-0.486657	0.495604	-0.981949	0.326125	0.627915
ENSSSCG00000044896	0.768606	-1.51666	2.68819	-0.564192	0.572623	NA
BNC2	328.284	1.19081	0.9696	1.22814	0.219393	0.521515
CCDC171	30.9923	-1.95953	0.867221	-2.25955	0.023849	0.163882
PSIP1	890.007	-0.406578	0.35661	-1.14012	0.254237	0.560786
SNAPC3	574.396	0.0114833	0.296781	0.0386928	0.969135	0.989018
TTC39B	428.485	0.200439	0.321289	0.623859	0.53272	0.780522
PTPRD	125.003	2.06562	1.03543	1.99494	0.0460497	0.234108
DMAC1	134.477	-0.0699271	0.341871	-0.204542	0.83793	0.940496
ENSSSCG00000062923	0.299104	-1.49468	4.03444	-0.370481	0.711024	NA
NFIB	562.351	0.366989	0.405421	0.905206	0.365356	0.661482
MPDZ	1042.77	0.285558	0.493592	0.578531	0.562906	0.798441
LURAP1L	685.806	0.0163363	0.434856	0.0375672	0.970033	0.989419
ENSSSCG00000046128	0.741851	-2.8087	3.75707	-0.747576	0.454716	NA
ENSSSCG00000046197	4.47078	2.35835	1.81245	1.30119	0.193194	NA
ENSSSCG00000054669	8.91077	0.734991	1.31714	0.558019	0.576831	0.806663
ENSSSCG00000054565	1.04106	3.69154	3.50976	1.05179	0.292895	NA
ENSSSCG00000041617	6.26918	0.728798	1.10961	0.656803	0.511307	0.766007
ENSSSCG00000061754	208.678	-0.130322	0.29934	-0.435366	0.663297	0.855284
ENSSSCG00000052760	0.142313	-0.561077	4.08047	-0.137503	0.890633	NA
ENSSSCG00000061890	10.6694	0.707147	1.03564	0.682812	0.494726	0.754946
ENSSSCG00000053877	0.619054	-1.09583	2.73413	-0.400798	0.688569	NA
ENSSSCG00000052866	0.215857	1.36248	4.08047	0.333902	0.738454	NA
ENSSSCG00000057962	0.177636	1.36248	4.08047	0.333902	0.738454	NA
ENSSSCG00000062118	1.87429	1.13416	2.10907	0.537754	0.590747	NA
ENSSSCG00000054940	1.73101	-0.457047	1.42068	-0.321709	0.747673	NA
ENSSSCG00000054761	9.79477	0.0836933	0.85323	0.0980899	0.921861	0.971038
ENSSSCG00000063121	5.06629	0.0931728	0.813377	0.114551	0.908801	0.967892
ECPAS	3853.33	0.53608	0.167038	3.20933	0.00133046	0.02815
ENSSSCG00000039753	0.177636	1.36248	4.08047	0.333902	0.738454	NA
ENSSSCG00000045611	0.327188	0.400704	4.08047	0.0982003	0.921773	NA
ZNF483	27.7346	-0.200283	0.721867	-0.277451	0.781434	0.917281
PTGR1	465.837	-0.108931	0.479577	-0.227139	0.820316	0.932847
ENSSSCG00000042365	21.865	-0.220838	0.491861	-0.448984	0.653443	0.849671
ENSSSCG00000005460	395.588	0.0944473	0.250725	0.376697	0.706399	0.880887
GNG10	1575.96	0.0202068	0.154994	0.130371	0.896273	0.963095
SHOC1	0.857867	-3.02169	3.49543	-0.864468	0.387331	NA
UGCG	168.431	0.0303	0.321238	0.0943229	0.924853	0.972306
PTBP3	6741.91	0.501754	0.623523	0.804708	0.420988	0.704855
HSDL2	772.991	0.717875	0.281727	2.54813	0.0108303	0.104257
KIAA1958	33.8436	-1.50778	0.597497	-2.52349	0.0116198	0.109101
INIP	793.443	-0.473218	0.219508	-2.15581	0.0310981	0.188636
SNX30	148.076	-0.865376	0.424585	-2.03817	0.041533	0.221847
SLC46A2	1258.81	0.609459	1.2095	0.503894	0.614336	0.828518
ENSSSCG00000005473	0.863427	3.41919	3.96607	0.86211	0.388627	NA
SAL1	82.7256	-1.8473	1.17304	-1.5748	0.115303	0.377984
ENSSSCG00000047560	9.84543	1.54946	1.04024	1.48953	0.136349	0.411315
ENSSSCG00000005475	76.5411	0.413064	0.739303	0.55872	0.576353	0.806492
ENSSSCG00000005440	463.084	-0.0819643	0.316062	-0.25933	0.795381	0.92315
ELP1	619.857	-0.536756	0.171252	-3.13431	0.0017226	0.0333767
TMEM245	1497.19	0.314936	0.268115	1.17463	0.240143	0.546252
ENSSSCG00000048786	2.16652	-0.967609	1.31081	-0.738179	0.460406	NA
FRRS1L	1.39723	1.92963	2.07734	0.928892	0.352945	NA
EPB41L4B	916.006	-0.859526	0.74077	-1.16031	0.245921	0.55208
PTPN3	1064.49	-0.352359	0.648037	-0.543733	0.586625	0.812439
PALM2AKAP2	1953.17	1.48475	0.975663	1.52178	0.128063	0.39829
C9orf152	103.647	-0.0955234	1.01953	-0.0936939	0.925352	0.972574
ENSSSCG00000005453	6903.47	1.58977	0.682441	2.32954	0.0198307	0.147078
TXNDC8	1.11417	2.62556	2.45274	1.07046	0.284412	NA
SVEP1	1876.89	2.25619	0.851424	2.6499	0.00805158	0.0874267
MUSK	1.07674	-0.970715	1.91349	-0.507301	0.611944	NA
LPAR1	774.77	-0.49665	0.225623	-2.20124	0.027719	0.177526
ENSSSCG00000044924	1.00231	1.34366	2.06168	0.651732	0.514574	NA
ENSSSCG00000047454	0.431713	2.40925	4.02526	0.598534	0.549484	NA
ENSSSCG00000035397	0.215857	1.36248	4.08047	0.333902	0.738454	NA
ENSSSCG00000053039	612.914	0.290096	0.24921	1.16406	0.2444	0.550852
NIPSNAP3A	242.172	-0.499211	0.32297	-1.54569	0.12218	0.389026
ABCA1	1714.8	0.729796	0.540331	1.35065	0.176808	0.468204
SLC44A1	4437.36	0.460454	0.192212	2.39555	0.0165955	0.133525
FSD1L	509.231	-0.0596159	0.393179	-0.151625	0.879482	0.9575
TAL2	0.183448	1.36248	4.08047	0.333902	0.738454	NA
TMEM38B	195.88	0.0401498	0.586276	0.0684828	0.945401	0.980522
ZNF462	319.901	0.0267511	0.525034	0.0509511	0.959364	0.985247
RAD23B	4339.67	0.384781	0.221909	1.73396	0.0829254	0.319774
KLF4	3568.04	0.53283	0.514371	1.03589	0.300255	0.604867
ENSSSCG00000031596	0.183448	1.36248	4.08047	0.333902	0.738454	NA
COL27A1	510.87	0.820337	0.86272	0.950872	0.341669	0.64042
ENSSSCG00000005488	3.32469	-1.75395	1.73457	-1.01117	0.311933	NA
AKNA	244.836	-1.30772	0.589311	-2.21907	0.0264822	0.173328
WHRN	41.6959	-1.4123	0.769887	-1.83443	0.0665901	0.285365
ENSSSCG00000053522	1962.44	0.191028	0.172017	1.11052	0.266775	0.574171
FAM189A2	1001.19	-1.17524	0.504545	-2.32931	0.0198424	0.147078
ENSSSCG00000048487	1.0919	1.40983	2.01181	0.700779	0.483441	NA
VLDLR	977.168	1.62591	0.658408	2.46946	0.0135316	0.119218
TEX48	0.143642	-0.561077	4.08047	-0.137503	0.890633	NA
ENSSSCG00000059646	23.7665	-0.956861	0.552819	-1.73088	0.0834739	0.320531
TNFSF8	36.0577	-0.299721	0.702297	-0.426773	0.669545	0.859838
TNC	3890.85	2.88876	1.19041	2.42669	0.0152371	0.127262
ENSSSCG00000041522	1.44283	1.18704	1.63991	0.723844	0.469161	NA
SMARCA2	3171.21	0.497881	0.363842	1.3684	0.171187	0.459722
SUSD1	60.137	0.893315	0.73335	1.21813	0.223175	0.526552
FKBP15	1349.04	0.0290064	0.189846	0.152789	0.878565	0.95705
KDM4C	551.102	0.0402599	0.183162	0.219805	0.826023	0.935002
GLDC	6.20454	-1.87753	1.22052	-1.53831	0.123973	0.392079
UHRF2	1162.07	-0.194098	0.249941	-0.776577	0.437409	0.71742
RANBP6	947.086	-0.118251	0.156537	-0.755418	0.449998	0.725589
TPD52L3	0.143642	-0.561077	4.08047	-0.137503	0.890633	NA
IL33	550.534	1.6212	0.490807	3.30313	0.000956126	0.0226044
DMRT2	23.6779	7.31044	3.22596	2.26613	NA	NA
DMRT3	1.95131	0.282292	2.56403	0.110097	0.912332	NA
DMRT1	0.149552	-0.561077	4.08047	-0.137503	0.890633	NA
KANK1	5515.79	1.5919	0.593145	2.68384	0.00727827	0.0824268
ZNF618	188.685	-0.296877	0.294525	-1.00799	0.313461	0.617312
ENSSSCG00000035807	7.12232	1.76431	1.85261	0.952335	0.340927	0.63995
AMBP	2.06223	-0.761936	1.5542	-0.490244	0.623961	NA
SLC31A2	546.575	1.15398	0.818449	1.40996	0.158552	0.442511
DOCK8	869.305	-1.50075	0.487918	-3.07582	0.00209925	0.0375941
KIF12	190.574	-1.86577	0.765417	-2.43758	0.0147858	0.12562
SLC31A1	2651.92	1.15865	0.62836	1.84393	0.0651932	0.282002
SMPDL3A	180.691	0.287071	0.616835	0.465394	0.64165	0.843939
CDC26	408.046	-0.167294	0.316249	-0.528993	0.59681	0.819099
PRPF4	624.026	-0.384163	0.211246	-1.81856	0.0689787	0.290852
FABP7	1.36441	0.362976	2.66064	0.136424	0.891486	NA
PKIB	704.555	1.72421	1.02201	1.68707	0.0915898	0.336049
RNF183	27.8093	-1.5041	0.640403	-2.34868	0.01884	0.142722
WDR31	189.993	-1.25353	0.644307	-1.94554	0.0517098	0.248711
ENSSSCG00000005241	304.647	-0.496811	0.359887	-1.38047	0.167443	0.454978
SERINC1	6967.41	0.652332	0.372329	1.75203	0.0797682	0.313624
BSPRY	176.013	-0.179064	0.981116	-0.182511	0.855182	0.9476
HDHD3	166.662	-0.246978	0.389192	-0.634592	0.525694	0.775707
ALAD	541.78	-0.394125	0.323719	-1.21749	0.223417	0.52692
ENSSSCG00000005478	807.536	-0.19244	0.258316	-0.744979	0.456284	0.729596
C9orf43	2.76789	0.805093	1.33029	0.605202	0.545045	NA
PERP	23465	1.35621	0.85247	1.59092	0.111628	0.372057
HSF2	506.649	0.0488213	0.399114	0.122324	0.902642	0.966304
SLC2A12	789.762	-0.0981428	0.330151	-0.297266	0.766263	0.91011
PGM5	5821.73	2.66596	1.25005	2.13268	NA	NA
ENSSSCG00000053708	1799.53	0.532529	0.326193	1.63256	0.102562	0.356745
RNF217	203.21	0.463165	0.415277	1.11532	0.264715	0.572293
TBPL1	352.154	-0.138788	0.24296	-0.571237	0.567839	0.80116
NKAIN2	108.719	3.54411	1.87734	1.88784	0.0590479	0.267538
TMEM252	5.57785	3.55354	1.93704	1.83452	0.066577	0.285365
PIP5K1B	41.9716	-0.134385	0.961841	-0.139717	0.888884	0.960603
TRDN	12.8414	3.31946	1.24336	2.66975	0.00759069	0.0847133
TCF21	242.71	1.80578	1.18296	1.52649	0.126887	0.396607
ENSSSCG00000050248	0.435508	-2.04216	2.76987	-0.737275	0.460955	NA
EYA4	158.408	3.26482	1.69321	1.92818	0.0538323	0.253871
FXN	181.994	-0.723062	0.337812	-2.14043	0.0323203	0.193062
ENSSSCG00000005247	3077.36	0.59106	0.370094	1.59706	0.110253	0.369445
ENSSSCG00000054772	0.149552	-0.561077	4.08047	-0.137503	0.890633	NA
ENSSSCG00000005419	0.284627	-1.43241	4.03998	-0.354559	0.72292	NA
TNFAIP3	235.33	0.281988	0.462371	0.609875	0.541945	0.78654
ENSSSCG00000053150	3.66477	0.135992	0.974406	0.139564	0.889004	NA
ENSSSCG00000048390	2.08635	3.63186	3.49652	1.03871	0.298941	NA
ENSSSCG00000005432	1.26944	1.73176	1.66069	1.0428	0.297043	NA
ENSSSCG00000051392	2.03924	-0.350219	1.88449	-0.185843	0.852568	NA
ENSSSCG00000045877	0.576941	2.84628	2.62395	1.08473	0.278041	NA
ENSSSCG00000061308	0.149552	-0.561077	4.08047	-0.137503	0.890633	NA
ENSSSCG00000051531	0.42694	-2.01623	3.99614	-0.504544	0.613879	NA
CLVS2	1.09623	0.518153	3.80206	0.136282	0.891598	NA
REPS1	1591.95	0.0936918	0.360596	0.259825	0.794999	0.92315
ENSSSCG00000057779	1.58849	3.19942	2.43736	1.31266	0.189298	NA
ENSSSCG00000058964	0.177636	1.36248	4.08047	0.333902	0.738454	NA
ENSSSCG00000053631	0.47674	-0.532904	4.03444	-0.132089	0.894914	NA
ENSSSCG00000047702	0.359499	0.400704	4.08047	0.0982003	0.921773	NA
RPS12	12906.8	0.225274	0.276846	0.813714	0.415809	0.70155
ENSSSCG00000043047	1.01403	1.33786	1.98682	0.673368	0.500713	NA
ENSSSCG00000051799	12.5149	0.495728	0.693222	0.715107	0.474543	0.743084
ENSSSCG00000058641	0.142313	-0.561077	4.08047	-0.137503	0.890633	NA
SLC18B1	302.797	-0.101864	0.382946	-0.266001	0.790238	0.921116
ENSSSCG00000042821	1.1621	-0.0415684	2.02375	-0.0205403	0.983612	NA
ENSSSCG00000059950	0.516448	1.24269	4.04301	0.307368	0.758563	NA
ENSSSCG00000054311	1.16206	0.782437	2.65126	0.295119	0.767903	NA
ENSSSCG00000058632	0.183448	1.36248	4.08047	0.333902	0.738454	NA
ENSSSCG00000061287	9.729	0.0847894	1.51682	0.0558994	0.955422	0.983895
ENSSSCG00000041449	315.455	0.191144	0.219656	0.870197	0.384193	0.676375
ENSSSCG00000062879	0.215857	1.36248	4.08047	0.333902	0.738454	NA
ENSSSCG00000043626	0.814065	-1.53532	3.87641	-0.396067	0.692056	NA
ENSSSCG00000060784	11.8539	-2.3826	0.824886	-2.8884	0.00387204	0.0554751
ENSSSCG00000047804	1.26662	0.880334	2.02996	0.43367	0.664528	NA
ENSSSCG00000004179	3490.81	-0.47026	1.40819	-0.333946	0.73842	0.897258
ENSSSCG00000043950	0.60935	2.91876	3.82972	0.762133	0.44598	NA
ENSSSCG00000062611	30.1005	-0.200002	0.386717	-0.517179	0.605031	0.824456
ENSSSCG00000055985	2.97132	0.302093	1.31807	0.229194	0.818718	NA
TNFSF15	86.6307	-0.743284	0.645474	-1.15153	0.249513	0.555923
ENSSSCG00000049638	1.61678	0.337849	1.61336	0.209407	0.834131	NA
ENSSSCG00000004180	11.5561	1.1122	1.28127	0.868045	0.385369	0.676928
ENSSSCG00000051325	30.036	1.00077	0.47805	2.09345	0.0363092	0.204708
ECT2L	225.785	-7.43241	2.00708	-3.7031	NA	NA
ENSSSCG00000044363	21.8614	0.102954	0.424204	0.242699	0.808239	0.928013
CCDC28A	563.686	0.125452	0.558943	0.224446	0.82241	0.933558
ENSSSCG00000060050	0.581266	1.44744	4.02206	0.359876	0.71894	NA
NHSL1	1350.5	-0.519356	0.591628	-0.877843	0.380029	0.672942
ssc-mir-378b	0.142313	-0.561077	4.08047	-0.137503	0.890633	NA
ENSSSCG00000004150	1198.88	1.23857	0.528446	2.34381	0.0190881	0.143698
SMIM28	0.183448	1.36248	4.08047	0.333902	0.738454	NA
VNN1	291.411	-0.230384	1.12685	-0.204449	NA	NA
ENSSSCG00000004151	0.143642	-0.561077	4.08047	-0.137503	0.890633	NA
ENSSSCG00000054150	41.0145	-1.65944	1.22313	-1.35671	0.174873	0.464757
ARFGEF3	476.432	-2.47805	0.622248	-3.98241	6.82196e-05	0.00355058
ENPP1	399.359	1.00454	0.758408	1.32454	0.185324	0.480493
SGK1	3760.53	1.19832	0.545765	2.19567	0.0281154	0.178774
CCDC68	227.682	-1.65874	0.360784	-4.59759	4.27412e-06	0.00048699
MBD2	709.692	0.373548	0.497905	0.750239	0.453111	0.72728
MYB	187.753	-5.02337	1.60192	-3.13585	0.00171357	0.0332631
ENPP3	1009.52	-3.1057	0.599853	-5.17743	2.24958e-07	4.50345e-05
POLI	228.879	-0.627424	0.284889	-2.20234	0.0276411	0.177431
ATP6V1G1	140.202	0.309677	0.549008	0.564066	0.572709	0.803894
MED23	1349.28	-0.516098	0.190633	-2.70729	0.00678359	0.0790543
RGS3	636.607	0.366633	0.425765	0.861116	0.389174	0.680208
CITED2	1895.95	1.36787	0.338683	4.03879	5.37271e-05	0.00295114
TXLNB	24.2837	-1.0241	0.64307	-1.59252	0.111268	0.371252
STARD6	12.842	1.41061	0.880106	1.60278	0.108984	0.367045
C18orf54	85.3104	0.680855	0.551569	1.2344	0.217055	0.51878
HECA	2822.32	0.8937	0.28959	3.08609	0.00202808	0.036853
ABRACL	405.928	0.396123	0.722081	0.548586	0.58329	0.810349
ENSSSCG00000060550	501	0.088945	0.23436	0.379523	0.704299	0.879852
APBA1	256.969	1.75737	1.1418	1.53912	NA	NA
ENSSSCG00000038606	1.36445	-0.17933	2.66622	-0.0672601	0.946375	NA
ENSSSCG00000042812	5.40983	5.07815	2.34275	2.16761	0.0301887	0.185589
ALDH8A1	4.9235	3.39267	1.89943	1.78615	0.0740751	0.301213
PTAR1	351.618	-0.489766	0.36084	-1.35729	0.174688	0.464631
RAB27B	1818.81	0.419216	0.747013	0.561189	0.574669	0.805338
ENSSSCG00000043320	0.42694	-2.01623	3.99614	-0.504544	0.613879	NA
RNF111	1122.95	-0.0196021	0.203079	-0.0965242	0.923104	0.971707
C9orf135	79.8673	-5.86553	1.6334	-3.59099	0.000329423	0.0110879
MAMDC2	357.744	0.162496	1.03107	0.1576	0.874772	0.956079
UTRN	4817.7	0.331144	0.322971	1.0253	0.30522	0.609897
ENSSSCG00000005255	993.133	-0.0826965	0.235745	-0.350788	0.725748	0.890519
SLTM	1406.03	-0.154295	0.307334	-0.502043	0.615637	0.829391
KLF9	1645.98	1.1812	0.687572	1.71793	0.0858086	0.324583
TRPM3	38.8335	0.255535	0.524112	0.487558	0.625863	0.835359
ENSSSCG00000057517	3.46745	1.29338	1.26459	1.02277	0.306418	NA
STX11	199.531	0.644075	0.615853	1.04583	0.295642	0.600796
PLAGL1	194.714	0.110454	0.445816	0.247757	0.804323	0.92615
ZC2HC1B	1.54259	0.204005	2.68035	0.0761113	0.939331	NA
ENSSSCG00000034769	2.01486	0.845988	1.32361	0.639153	0.522723	NA
MINDY2	643.697	0.373857	0.331337	1.12833	0.259181	0.565664
CEMIP2	1045.45	0.896542	0.36388	2.46384	0.0137458	0.120601
RORA	209.566	0.945804	0.367201	2.57571	0.0100035	0.0995559
RFX3	89.9521	-1.564	0.867251	-1.8034	0.0713247	0.296525
HDDC2	197.72	0.00960233	0.377263	0.0254526	0.979694	0.993169
TPD52L1	49.9142	-4.10414	1.1758	-3.4905	0.000482115	0.0145959
ENSSSCG00000039823	1.87788	-0.345425	2.71232	-0.127354	0.89866	NA
PUM3	822.366	-0.514485	0.149488	-3.44164	0.000578191	0.016505
SPATA6L	119.244	-2.02129	0.938458	-2.15384	0.031253	0.188998
SLC1A1	183.687	0.127757	0.931468	0.137156	0.890907	0.961057
ENSSSCG00000040918	455.289	0.0469887	0.287586	0.16339	0.870211	0.953828
GLIS3	883.168	-2.08803	0.490496	-4.25698	2.07211e-05	0.00148059
ENSSSCG00000039614	0.798019	-0.280976	2.67046	-0.105216	0.916204	NA
ICE2	527.154	-0.210274	0.181201	-1.16045	0.245865	0.55208
PHACTR2	1139.95	0.396329	0.358475	1.1056	0.2689	0.576439
KIAA2026	1163.58	-0.279783	0.161695	-1.73031	0.0835749	0.320531
MLANA	0.721463	-2.77194	2.40125	-1.15438	0.248345	NA
ANXA2	34565.5	0.12999	0.543819	0.239031	0.811081	0.929219
ERMP1	1435.79	0.211199	0.716203	0.294887	0.76808	0.910734
ARG1	97.596	6.17446	1.55481	3.9712	NA	NA
FUCA2	1988	0.0156354	0.336535	0.0464599	0.962944	0.98622
RIC1	626.629	0.202649	0.28485	0.711424	0.476822	0.744696
PEX3	398.415	0.100356	0.247991	0.404676	0.685716	0.869415
AKAP7	788.818	0.00799586	0.21181	0.0377502	0.969887	0.989419
ADAT2	81.9632	-0.128732	0.277551	-0.463813	0.642782	0.844273
PDCD1LG2	32.0217	-1.44396	0.551351	-2.61894	0.0088203	0.092383
AIG1	384.694	1.04546	0.782198	1.33657	0.181364	0.474676
CD274	82.2907	-0.138835	0.474509	-0.292586	0.769838	0.912026
ENSSSCG00000044542	0.469502	-0.500889	2.8624	-0.174989	0.861088	NA
HIVEP2	1185.72	0.430851	0.268911	1.60221	0.10911	0.367322
ENSSSCG00000048426	0.149552	-0.561077	4.08047	-0.137503	0.890633	NA
PLGRKT	452.733	0.54505	0.408735	1.3335	0.182366	0.476634
EPB41L2	1833.57	1.27901	0.688334	1.85812	0.0631516	0.277397
ADGRG6	836.606	1.7067	0.730961	2.33488	0.01955	0.145887
FOXB1	0.497586	1.20254	4.04678	0.29716	0.766344	NA
ENSSSCG00000005216	3.29857	-0.182392	1.31678	-0.138513	0.889835	NA
BNIP2	1239.19	0.369732	0.286577	1.29017	0.196992	0.494399
ENSSSCG00000004583	536.139	0.149617	0.160727	0.930879	0.351916	0.65084
INSL6	1.62372	-2.80828	1.79501	-1.5645	0.117701	NA
VTA1	1441.81	0.251192	0.314805	0.79793	0.424911	0.70771
JAK2	1207.22	-0.228743	0.417081	-0.548437	0.583392	0.810355
GCNT3	287.109	2.81864	0.850966	3.31228	0.000925374	0.0221028
FAM81A	161.341	-1.54707	0.950742	-1.62722	0.10369	0.358379
MYO1E	2976.97	0.295527	0.250595	1.1793	0.238278	0.544014
IFNGR1	2584.67	0.421181	0.479523	0.878334	0.379763	0.672827
IL22RA2	2.97369	-1.49273	1.42232	-1.0495	0.293946	NA
ENSSSCG00000052472	0.574027	1.44748	4.02526	0.359599	0.719147	NA
CCNB2	237.804	1.20635	1.16822	1.03264	0.301774	0.606386
RCL1	379.958	-0.138685	0.271307	-0.511174	0.609229	0.826437
IL20RA	1543.57	0.374617	0.932985	0.401526	0.688033	0.870521
SLC35D3	3.39025	-0.31087	0.989512	-0.314165	0.753396	NA
AK3	2949.54	0.355075	0.655126	0.541994	0.587822	0.813496
PEX7	541.227	-0.222016	0.325164	-0.682782	0.494744	0.754946
TCF4	246.736	0.570223	0.597263	0.954726	0.339716	0.639
CDC37L1	835.093	-0.0702062	0.198458	-0.353758	0.72352	0.889654
MAP3K5	1180.79	-0.403194	0.116346	-3.46546	0.000529327	0.0155904
HEY2	163.649	1.70336	0.538408	3.16369	0.00155784	0.0314986
ENSSSCG00000044946	3.40552	-0.284067	1.14439	-0.248226	0.80396	NA
ENSSSCG00000046709	0.355272	2.16432	4.04679	0.534824	0.592772	NA
ENSSSCG00000046403	1.65076	-0.158404	1.47217	-0.107599	0.914314	NA
ENSSSCG00000057474	215.801	-0.0310583	0.246355	-0.126071	0.899675	0.964907
STX7	1119.9	0.0811407	0.385992	0.210213	0.833501	0.938602
PLPP6	115.627	-0.105466	0.391757	-0.269213	0.787766	0.919899
MAP7	1193.47	-0.245843	0.81878	-0.300255	0.763983	0.90893
ENSSSCG00000042982	2.30346	-0.408355	1.31306	-0.310994	0.755805	NA
ENSSSCG00000057706	1.232	-1.20883	1.88334	-0.641851	0.52097	NA
ENSSSCG00000061106	1.16421	-3.46016	2.05153	-1.68662	0.0916758	NA
ENSSSCG00000052809	0.299104	-1.49468	4.03444	-0.370481	0.711024	NA
ENSSSCG00000061367	0.611815	-1.07684	2.73211	-0.394143	0.693476	NA
ENSSSCG00000056124	28.4685	-0.686541	0.516649	-1.32883	0.183903	0.478942
ENSSSCG00000057368	0.284627	-1.43241	4.03998	-0.354559	0.72292	NA
ENSSSCG00000051776	1.93006	-3.08332	1.6884	-1.82618	0.0678236	NA
ENSSSCG00000043234	1.22028	-1.2161	1.99285	-0.610232	0.541708	NA
ENSSSCG00000054958	1.18771	-2.29581	2.0385	-1.12622	0.260071	NA
ENSSSCG00000060676	2.07165	-0.331469	1.89573	-0.17485	0.861198	NA
ENSSSCG00000054547	0.143642	-0.561077	4.08047	-0.137503	0.890633	NA
MOXD1	318.883	1.86954	0.960161	1.94712	0.0515209	0.248364
ENSSSCG00000053418	4.74754	1.59245	1.35075	1.17894	0.238423	NA
ENSSSCG00000062478	0.325761	0.400704	4.08047	0.0982003	0.921773	NA
ENSSSCG00000053718	308.473	3.01134	1.32129	2.27909	NA	NA
ENSSSCG00000056909	0.355272	2.16432	4.04679	0.534824	0.592772	NA
ENSSSCG00000061171	1.77963	-0.416848	1.29925	-0.320837	0.748334	NA
ENSSSCG00000058961	4.46571	-0.750377	1.39807	-0.536725	0.591458	NA
ENSSSCG00000061136	18.4207	2.88261	0.925511	3.11462	0.00184183	0.0348426
CCN2	6582.94	-1.78977	0.48126	-3.71893	0.000200071	0.00780972
ENSSSCG00000058411	0.284627	-1.43241	4.03998	-0.354559	0.72292	NA
ENSSSCG00000062003	0.42694	-2.01623	3.99614	-0.504544	0.613879	NA
ENSSSCG00000061837	2.61553	0.674928	1.60993	0.419227	0.67505	NA
TMEM200A	129.978	1.20451	1.00334	1.2005	0.229945	0.534394
TMEM260	867.511	-0.306419	0.282282	-1.08551	0.277697	0.583751
TXNL1	2313.95	0.321461	0.17185	1.87059	0.0614024	0.27352
PTPRK	3433.28	0.604444	0.649802	0.930197	0.352269	0.651207
ENSSSCG00000019937	4.21534	-1.1492	1.0095	-1.13839	0.254957	NA
ssc-mir-204	0.183448	1.36248	4.08047	0.333902	0.738454	NA
ENSSSCG00000057314	375.494	0.15275	0.294623	0.518459	0.604138	0.824098
ENSSSCG00000050857	12.6564	-2.84783	1.6698	-1.70549	0.0881022	0.329489
ENSSSCG00000058562	148.843	-0.293084	0.259095	-1.13118	0.257978	0.564154
HIF1A	5130.68	0.815425	0.386303	2.11084	0.034786	0.19959
WDR7	930.976	-0.27999	0.188559	-1.4849	0.137571	0.413522
SNAPC1	136.651	0.109902	0.346791	0.316912	0.75131	0.903498
ST8SIA3	0.291865	-1.4638	4.03716	-0.362581	0.716918	NA
SYT16	13.9869	1.02549	1.14524	0.895433	0.370556	0.665319
ENSSSCG00000041512	76.9904	-0.0947686	0.545415	-0.173755	0.862058	0.95062
FECH	765.664	-0.047876	0.19221	-0.249082	0.803297	0.925843
ENSSSCG00000037043	0.569253	-2.43065	3.97402	-0.611636	0.540778	NA
ISG20	280.903	0.65894	0.961804	0.685108	0.493275	0.754581
ENSSSCG00000033063	0.143642	-0.561077	4.08047	-0.137503	0.890633	NA
ENSSSCG00000047303	3.20293	0.0305352	1.41696	0.0215498	0.982807	NA
SAMD4A	1112.95	2.53658	1.07777	2.35355	0.0185949	0.141374
THEMIS	8.89858	-0.691598	0.604557	-1.14397	0.252634	0.559224
NARS1	2626.75	-0.155396	0.160032	-0.971032	0.331532	0.632242
GCH1	85.5131	0.139337	0.297385	0.468542	0.639397	0.842598
AEN	894.738	-1.04501	0.442916	-2.3594	0.0183047	0.139756
ENSSSCG00000004213	0.177636	1.36248	4.08047	0.333902	0.738454	NA
MTFMT	304.216	0.298805	0.299011	0.999311	0.317644	0.620964
SPG21	1134.56	0.111221	0.253079	0.439471	0.66032	0.85319
ENSSSCG00000038602	5.22289	1.12637	1.92271	0.585822	0.557995	0.796198
EXOC5	1736.43	0.722168	0.389942	1.85199	0.0640277	0.279228
ANKDD1A	4.73664	2.14502	1.20259	1.78367	0.074478	NA
KIAA0408	65.3062	1.61246	0.953316	1.69142	0.0907571	0.334644
ENSSSCG00000037998	5.73471	0.56621	0.749207	0.755746	0.449801	0.725492
ECHDC1	3695.87	1.13816	0.688474	1.65316	0.0982986	0.348897
ENSSSCG00000004547	534.075	0.84601	0.743395	1.13804	0.255106	0.561509
RNF146	1544.39	0.238912	0.195682	1.22092	0.222115	0.525119
BCLAF1	4417.16	-0.445983	0.244455	-1.8244	0.0680918	0.288591
RSPO3	306.114	0.739024	1.43097	0.516451	0.605539	0.824549
ENSSSCG00000057184	90.523	0.513862	0.410328	1.25232	0.210453	0.511266
TRMT11	168.274	-0.261399	0.227459	-1.14921	0.250468	0.556915
HINT3	421.013	0.032947	0.446717	0.0737535	0.941206	0.979097
PIF1	41.9478	0.850507	0.700488	1.21416	0.224685	0.528581
NCOA7	1458.22	0.535953	0.317865	1.6861	0.091776	0.336512
MTFR2	48.5973	0.457874	1.36842	0.334602	0.737926	0.897258
RBPMS2	324.978	1.36959	1.17748	1.16316	0.244766	0.551418
PDE7B	578.402	-0.0172402	0.279941	-0.0615853	0.950893	0.982351
OAZ2	1631.4	-0.0410303	0.344667	-0.119043	0.905241	0.966957
ZNF609	2696.22	-0.270592	0.220795	-1.22554	0.220373	0.522613
SAMD3	14.3913	-0.31826	0.557507	-0.570862	0.568093	0.801318
TRIP4	547.384	0.0885228	0.206412	0.428866	0.668021	0.858708
AHI1	417.028	0.0186365	0.533321	0.0349441	0.972124	0.989971
PCLAF	354.582	0.777392	1.13183	0.686846	0.49218	0.753964
L3MBTL3	734.981	0.236231	0.284723	0.829686	0.406717	0.693987
CSNK1G1	955.299	0.0150822	0.298345	0.0505529	0.959682	0.985338
TMEM244	5.42046	-5.68068	2.22819	-2.54946	0.0107891	0.104023
ARHGAP18	521.231	-0.0345649	0.470638	-0.0734426	0.941454	0.979198
PPIB	1714.58	-0.217586	0.32124	-0.677333	0.498195	0.75708
ENSSSCG00000043584	0.83491	-0.178495	2.11964	-0.0842097	0.93289	NA
ENSSSCG00000004170	448.521	0.322507	0.641559	0.502693	0.61518	0.829166
ENSSSCG00000062397	630.439	-0.236462	0.373629	-0.632878	0.526813	0.776313
SNX22	10.3242	-0.256815	0.583534	-0.440102	0.659863	0.853091
ENSSSCG00000062051	0.293194	-1.46953	4.03665	-0.364048	0.715822	NA
ENSSSCG00000057824	0.611717	-1.0613	2.72568	-0.389369	0.697003	NA
ENSSSCG00000004207	902.978	0.307353	0.862149	0.356497	0.721469	0.888567
ENSSSCG00000062411	3.18256	-0.0284483	1.03478	-0.027492	0.978067	NA
ENSSSCG00000054762	916.565	0.532927	0.479032	1.11251	0.26592	0.573649
ENSSSCG00000052089	36.676	-0.0123699	0.352741	-0.0350679	0.972026	0.98993
ENSSSCG00000062566	0.319949	0.400704	4.08047	0.0982003	0.921773	NA
ENSSSCG00000043315	4.08597	0.41249	2.03594	0.202604	0.839445	NA
ENSSSCG00000042703	2249.96	0.0492191	0.311485	0.158014	0.874446	0.956079
ENSSSCG00000060727	1.40698	-0.631277	1.63329	-0.386506	0.699122	NA
ENSSSCG00000062594	0.143642	-0.561077	4.08047	-0.137503	0.890633	NA
ENSSSCG00000056436	2.09184	-0.299627	1.30161	-0.230197	0.817938	NA
ENSSSCG00000053034	0.857084	0.989377	2.09592	0.472049	0.636892	NA
ENSSSCG00000052043	0.90368	-1.81767	2.54123	-0.715272	0.474441	NA
ENSSSCG00000053390	3.64157	1.65408	1.05233	1.57182	0.115992	NA
ENSSSCG00000063202	0.143642	-0.561077	4.08047	-0.137503	0.890633	NA
ENSSSCG00000033894	264.193	0.434326	0.814028	0.533551	0.593652	0.81712
ENSSSCG00000043068	0.149552	-0.561077	4.08047	-0.137503	0.890633	NA
ENSSSCG00000060593	0.215857	1.36248	4.08047	0.333902	0.738454	NA
AP5M1	660.491	-0.110411	0.213064	-0.518206	0.604314	0.824145
ENSSSCG00000055584	0.786986	3.29254	3.55174	0.927023	0.353914	NA
ENSSSCG00000059090	1.08615	2.60224	1.98764	1.30921	0.190462	NA
ENSSSCG00000060293	0.143642	-0.561077	4.08047	-0.137503	0.890633	NA
ENSSSCG00000056275	0.142313	-0.561077	4.08047	-0.137503	0.890633	NA
ENSSSCG00000055062	0.183448	1.36248	4.08047	0.333902	0.738454	NA
ENSSSCG00000059141	13.8154	0.355028	0.587576	0.604225	0.545694	0.788386
ENSSSCG00000059897	1.7657	1.6165	1.43234	1.12857	0.259078	NA
ENSSSCG00000063357	0.177636	1.36248	4.08047	0.333902	0.738454	NA
ENSSSCG00000052966	0.177636	1.36248	4.08047	0.333902	0.738454	NA
ENSSSCG00000061365	0.361084	2.18449	4.04488	0.540065	0.589152	NA
ENSSSCG00000057690	0.355272	2.16432	4.04679	0.534824	0.592772	NA
ENSSSCG00000057475	0.319949	0.400704	4.08047	0.0982003	0.921773	NA
ENSSSCG00000054580	0.321278	0.400704	4.08047	0.0982003	0.921773	NA
ENSSSCG00000062099	0.183448	1.36248	4.08047	0.333902	0.738454	NA
ENSSSCG00000061558	0.177636	1.36248	4.08047	0.333902	0.738454	NA
ENSSSCG00000058113	1.04354	2.53451	2.56455	0.988285	0.323013	NA
ENSSSCG00000061985	0.968416	0.327266	2.09029	0.156565	0.875588	NA
NAA30	891.671	-0.0278743	0.2352	-0.118513	0.905661	0.966957
ENSSSCG00000056139	1025.08	-2.2989	0.616793	-3.72718	0.000193633	0.00757596
ENSSSCG00000050757	107.655	0.0182846	0.788669	0.0231841	0.981503	0.993185
ENSSSCG00000042942	0.215857	1.36248	4.08047	0.333902	0.738454	NA
ENSSSCG00000053009	0.366896	2.20447	4.04301	0.545253	0.585579	NA
ENSSSCG00000062659	3.88044	-4.16921	2.51782	-1.65588	0.0977461	NA
TAAR9	0.544532	2.7734	3.88024	0.71475	0.474764	NA
ENSSSCG00000062201	5.09424	1.29356	1.2281	1.0533	0.292204	0.597611
ENSSSCG00000057397	1.12288	1.48171	2.09583	0.706982	0.479578	NA
ENSSSCG00000048279	0.149552	-0.561077	4.08047	-0.137503	0.890633	NA
ENSSSCG00000046186	0.365409	0.400704	4.08047	0.0982003	0.921773	NA
ENSSSCG00000060884	22.6007	-0.0824623	1.06928	-0.0771193	0.938529	0.97863
ENSSSCG00000061752	42.3397	-0.436626	0.556173	-0.785055	0.432422	0.713356
ENSSSCG00000052476	1.21048	-1.23913	2.62546	-0.471967	0.636951	NA
ENSSSCG00000056433	98.776	-1.27207	0.591654	-2.15002	0.0315535	0.189963
ENSSSCG00000057631	0.507722	-0.500821	2.8213	-0.177514	0.859104	NA
ENSSSCG00000054094	0.215857	1.36248	4.08047	0.333902	0.738454	NA
ENSSSCG00000047502	0.333	0.400704	4.08047	0.0982003	0.921773	NA
ENSSSCG00000052935	0.142313	-0.561077	4.08047	-0.137503	0.890633	NA
ENSSSCG00000052386	0.569253	-2.43065	3.97402	-0.611636	0.540778	NA
SLC35F4	0.149552	-0.561077	4.08047	-0.137503	0.890633	NA
CIAO2A	648.27	0.0532928	0.342652	0.15553	0.876403	0.95634
ENSSSCG00000062236	0.648369	0.350085	2.76042	0.126823	0.89908	NA
ENSSSCG00000043973	0.393493	2.29062	4.03524	0.567654	0.57027	NA
ENSSSCG00000058558	0.215857	1.36248	4.08047	0.333902	0.738454	NA
ENSSSCG00000058264	1.41574	-0.702018	2.51498	-0.279134	0.780142	NA
ENSSSCG00000060280	31.1774	2.33659	0.87514	2.66996	0.007586	0.0847133
ENSSSCG00000056089	0.365409	0.400704	4.08047	0.0982003	0.921773	NA
DAAM1	1442.86	0.747279	0.340892	2.19213	0.0283703	0.179771
ENSSSCG00000052570	2.17323	-0.924376	2.0922	-0.441819	0.65862	NA
ENSSSCG00000060378	3.17799	-1.69093	1.65811	-1.01979	0.307828	NA
HBS1L	1311.61	0.428706	0.124489	3.44371	0.000573789	0.0164275
ENSSSCG00000059265	1.41289	-0.646306	1.91606	-0.337309	0.735884	NA
DAPK2	224.691	-0.405435	0.671781	-0.603523	0.546161	0.788789
ENSSSCG00000058128	0.462263	-0.470633	4.03998	-0.116494	0.907261	NA
ENSSSCG00000050451	14.2247	-0.0339733	0.737749	-0.0460499	0.96327	0.986435
ENSSSCG00000063217	1.36825	2.95328	2.44153	1.2096	0.226431	NA
ENSSSCG00000055354	250.64	0.949264	0.506823	1.87297	0.0610729	0.272886
ENSSSCG00000051186	0.142313	-0.561077	4.08047	-0.137503	0.890633	NA
ENSSSCG00000044767	6.56674	0.883637	0.804387	1.09852	0.271976	0.579651
ENSSSCG00000063337	0.183448	1.36248	4.08047	0.333902	0.738454	NA
L3HYPDH	140.468	0.56668	0.60152	0.942079	0.346152	0.64544
ENSSSCG00000058521	6.0857	0.38294	1.06349	0.36008	0.718788	0.887354
JKAMP	525.106	0.632588	0.231188	2.73625	0.00621446	0.074818
ENSSSCG00000018450	1.80982	-1.94131	1.65848	-1.17054	0.241785	NA
ENSSSCG00000018972	8.59307	-0.619091	0.694323	-0.891647	0.372582	0.667679
HERC1	2039.59	0.272179	0.259358	1.04943	0.293978	0.59967
ENSSSCG00000018352	0.428269	-2.0203	3.99589	-0.505594	0.613142	NA
FBXL22	73.165	2.7074	1.05964	2.55502	0.0106183	0.103084
CCDC175	8.96707	-6.40632	3.11804	-2.0546	0.0399176	0.216859
RTN1	26.2906	-0.826533	1.12179	-0.7368	0.461244	0.733285
USP3	967.051	0.387155	0.284021	1.36312	0.172845	0.462429
ENSSSCG00000038358	0.143642	-0.561077	4.08047	-0.137503	0.890633	NA
WDHD1	292.185	-0.552907	0.346685	-1.59484	0.110748	0.370376
ALDH1A3	206.845	2.52549	0.575529	4.38811	1.14338e-05	0.000968884
SOCS4	766.976	-0.0597029	0.193772	-0.308109	0.757999	0.906406
CHSY1	555.338	0.298599	0.294896	1.01256	0.311272	0.615399
PLA2G4E	29.308	2.00526	1.57295	1.27484	0.202366	0.50169
MAPK1IP1L	1785.68	-0.0222637	0.132695	-0.167781	0.866756	0.952709
MEIS2	949.711	1.0302	1.06305	0.969102	0.332494	0.633042
PLA2G4F	305.646	3.55209	1.02623	3.4613	0.000537567	0.0157652
LGALS3	10215.4	-0.610453	0.583223	-1.04669	0.295243	0.600565
ENSSSCG00000053306	285.152	0.531112	0.178663	2.9727	0.0029519	0.0466522
CCDC9B	1237.03	0.845793	0.828191	1.02125	0.307135	0.611589
DLGAP5	365.788	1.08344	1.14123	0.94936	0.342437	0.641115
PLCB2	111.669	-0.254723	0.419792	-0.606784	0.543994	0.787693
FBXO34	322.595	0.243986	0.461182	0.529044	0.596775	0.819099
ENSSSCG00000040895	53.3231	0.295545	0.4269	0.692305	0.488746	0.752053
ENSSSCG00000059505	0.469404	-0.479423	2.85461	-0.167947	0.866625	NA
ATG14	334.639	0.127858	0.242215	0.52787	0.597589	0.819657
APH1B	367.17	0.609141	0.541151	1.12564	0.260318	0.566949
PAK6	1237.25	0.0724447	0.838947	0.0863519	0.931187	0.975902
BUB1B	393.78	0.774146	1.09884	0.704514	0.481113	0.747742
CA12	680.455	1.11114	0.807037	1.37681	0.16857	0.456443
KTN1	3935.12	-0.0294787	0.160687	-0.183454	0.854442	0.947365
ENSSSCG00000043097	1.90441	-0.615122	1.42075	-0.432956	0.665046	NA
RAB8B	1649.39	0.973139	0.330135	2.9477	0.00320152	0.0493568
TYRO3	1269.48	0.0134185	0.453606	0.0295819	0.976401	0.99181
GABRG3	4.15021	-1.79837	1.66591	-1.07951	0.28036	NA
RPS27L	709.686	0.0972618	0.141916	0.685349	0.493123	0.754581
GABRA5	0.284627	-1.43241	4.03998	-0.354559	0.72292	NA
MYEF2	116.904	0.254943	1.03265	0.246882	0.805	0.926276
LACTB	254.216	-0.335302	0.319429	-1.04969	0.293859	0.59967
GABRB3	1.20756	0.0162973	2.6945	0.00604836	0.995174	NA
TPM1	34434.1	2.50039	1.13516	2.20268	0.0276172	0.177413
SCG5	60.4708	-0.572185	0.887185	-0.644945	0.518963	0.770697
LINS1	383.278	0.0518426	0.25715	0.201605	0.840226	0.940882
PELI2	55.6876	0.344844	0.602127	0.57271	0.566841	0.800623
ASB7	414.382	0.0311048	0.25419	0.122368	0.902607	0.966304
ARMH4	785.89	-1.49096	0.463159	-3.21912	0.00128586	0.0275954
ENSSSCG00000004839	11.2467	0.59437	1.90742	0.311609	0.755338	0.905236
ENSSSCG00000049460	20.5997	-1.8648	0.518903	-3.59374	0.000325963	0.0110376
ACTR10	2078.45	0.421633	0.152378	2.76701	0.00565729	0.0699405
CERS3	252.855	5.88374	0.942792	6.24076	4.3544e-10	2.62244e-07
SELENOS	556.841	0.113705	0.20545	0.553445	0.579959	0.808386
ENSSSCG00000055131	22.6615	0.458161	0.679016	0.674743	0.499839	0.757984
PSMA3	1827.86	0.101237	0.191034	0.52994	0.596153	0.818776
MKRN3	4.64077	-0.0263155	1.84763	-0.0142428	0.988636	NA
LRRK1	1206.64	-0.191652	0.325866	-0.588131	0.556444	0.795408
ENSSSCG00000004811	14.7201	-1.96526	1.30379	-1.50734	0.131723	0.404218
ARID4A	1080.85	0.344509	0.23501	1.46593	0.142667	0.42074
IGF1R	2341.12	-0.542769	0.281205	-1.93015	0.053588	0.253524
SLC24A5	25.0586	0.984712	1.04545	0.941907	0.34624	0.64544
ENSSSCG00000041479	0.293194	-1.46953	4.03665	-0.364048	0.715822	NA
SEMA6D	139.74	1.34801	0.62287	2.16419	0.0304494	0.186177
TOMM20L	2.59798	-0.700095	1.32573	-0.528082	0.597443	NA
TLN2	1051.93	1.15893	0.793116	1.46124	0.14395	0.422308
CDIN1	325.619	-0.590354	0.336237	-1.75577	0.0791282	0.312053
ENSSSCG00000027270	199.11	-0.378612	0.397962	-0.951378	0.341413	0.640263
EHD4	2162.33	0.450092	0.541231	0.831609	0.40563	0.692952
KIAA0586	464.749	-0.0787605	0.212617	-0.370434	0.711059	0.883741
SPTBN5	14.5786	1.43792	0.72564	1.98159	0.0475255	0.237629
ENSSSCG00000061849	0.287284	-1.44406	4.03893	-0.357534	0.720692	NA
ENSSSCG00000048762	0.149552	-0.561077	4.08047	-0.137503	0.890633	NA
ENSSSCG00000057228	1.80888	-0.394363	1.44538	-0.272843	0.784974	NA
ENSSSCG00000043519	26.4252	0.712631	0.780178	0.913421	0.361021	0.657654
ENSSSCG00000004572	314.436	1.44678	0.738185	1.95992	0.0500052	0.244629
ENSSSCG00000004573	694.546	0.0938741	0.900852	0.104206	0.917006	0.969922
ENSSSCG00000004830	363.418	0.888855	0.886445	1.00272	0.315996	0.619644
VPS13C	2795.04	-0.561352	0.365271	-1.53681	0.12434	0.392842
DACT1	441.475	1.48566	0.912132	1.62877	0.103361	0.357753
ENSSSCG00000036551	1.20993	-2.31394	1.92032	-1.20498	0.228212	NA
ENSSSCG00000054906	4.00723	0.16921	0.867282	0.195104	0.845312	NA
PLA2G4B	171.916	0.291147	0.571382	0.509548	0.610368	0.827116
ENSSSCG00000005103	448.407	-0.397075	0.214622	-1.85011	0.0642974	0.279589
UBE3A	1789.34	0.0211579	0.160479	0.131842	0.895109	0.96258
MRPS11	390.287	-0.169754	0.296404	-0.572711	0.56684	0.800623
ENSSSCG00000057430	92.6051	0.446264	0.313056	1.42551	0.15401	0.436629
MRPL46	319.144	-0.0271392	0.187447	-0.144783	0.884882	0.959439
MAPKBP1	766.234	0.274843	0.522255	0.526262	0.598706	0.820241
NTRK3	663.666	2.03732	1.32102	1.54224	NA	NA
OTUD7A	56.5413	0.502602	0.704209	0.713711	0.475406	0.743617
KLF13	1823.59	0.478723	0.344497	1.38963	0.164642	0.451367
ENSSSCG00000035223	2270.33	2.03898	1.21457	1.67876	0.0931979	0.33894
FAM163B	136.395	5.68523	0.829336	6.85516	7.12347e-12	7.06606e-09
ENSSSCG00000005683	992.128	0.158646	0.350064	0.453192	0.650411	0.848447
MGA	1478.11	-0.838425	0.212361	-3.94812	7.87688e-05	0.00389524
TTC23	112.976	0.692819	0.601287	1.15223	0.249228	0.555509
BRD3	2081.75	-0.14859	0.173248	-0.857671	0.391074	0.681224
ENSSSCG00000063327	0.723579	0.52274	2.77695	0.188242	0.850687	NA
ESR2	3.60266	0.812115	0.946128	0.858357	0.390695	NA
ENSSSCG00000056777	184.536	0.674294	0.439462	1.53436	0.124941	0.393594
NTNG2	9.61514	1.09416	1.05902	1.03318	0.301519	0.606248
RPAP1	726.887	-0.435273	0.173482	-2.50904	0.0121059	0.111945
SETX	4343.63	0.115193	0.562192	0.204899	0.837651	0.94037
MEF2A	2120.59	0.548859	0.528429	1.03866	0.298962	0.60347
ENSSSCG00000005725	461.557	-0.200734	0.250532	-0.801233	0.422997	0.706404
BMF	1464.41	-0.216563	0.43844	-0.49394	0.621348	0.832628
CFAP77	59.1271	-8.16118	2.15401	-3.78884	NA	NA
SRP14	455.375	0.172788	0.178996	0.965313	0.334388	0.634819
ENSSSCG00000055870	0.149552	-0.561077	4.08047	-0.137503	0.890633	NA
SYNE2	8255.29	-0.644295	0.485565	-1.3269	0.184543	0.479869
ENSSSCG00000059580	0.177636	1.36248	4.08047	0.333902	0.738454	NA
ENSSSCG00000059979	0.507722	-0.500821	2.8213	-0.177514	0.859104	NA
TOR1A	502.228	-0.177268	0.163583	-1.08366	0.278517	0.58474
ENSSSCG00000055844	568.344	0.76199	0.700267	1.08814	0.276532	0.582749
LYSMD4	434.355	-0.0187675	0.190277	-0.0986326	0.92143	0.970924
MYMK	0.361084	2.18449	4.04488	0.540065	0.589152	NA
EIF2AK4	1845.66	-0.295283	0.295592	-0.998953	0.317817	0.621047
ENSSSCG00000057874	178.09	-0.193067	0.318789	-0.605628	0.544762	0.787902
ENSSSCG00000051803	3.46911	0.951968	1.85243	0.513902	0.607321	NA
ENSSSCG00000058109	3.66471	-1.92902	1.145	-1.68473	0.09204	NA
ENSSSCG00000051882	0.355272	2.16432	4.04679	0.534824	0.592772	NA
ADAMTS17	253.9	0.672545	1.18845	0.565901	0.571461	0.80318
ENSSSCG00000059248	4.10204	0.214709	1.44166	0.148932	0.881608	NA
ENSSSCG00000059569	1.28984	-0.317832	1.72699	-0.184039	0.853983	NA
ENSSSCG00000055636	13.1906	1.61818	1.06004	1.52653	0.126877	0.396607
ENSSSCG00000062745	24.7092	-1.66485	0.856248	-1.94435	0.0518531	0.248937
DDX31	295.19	-0.89109	0.259275	-3.43685	0.000588519	0.0166513
ENSSSCG00000056799	0.727373	-2.78163	2.40299	-1.15757	0.24704	NA
GREM1	245.378	7.10145	1.90963	3.71875	NA	NA
ENSSSCG00000054915	0.177636	1.36248	4.08047	0.333902	0.738454	NA
GTF3C4	516.03	-0.156422	0.16754	-0.933643	0.350488	0.649552
FMN1	529.791	-0.603713	0.828558	-0.728631	0.466227	0.736678
ENSSSCG00000061963	2.01097	2.57567	1.47984	1.7405	0.0817718	NA
ENSSSCG00000055290	396.339	0.728644	0.459428	1.58598	0.112743	0.373295
ENSSSCG00000044554	0.177636	1.36248	4.08047	0.333902	0.738454	NA
ENSSSCG00000040466	0.177636	1.36248	4.08047	0.333902	0.738454	NA
RAPGEF1	1389.71	-0.0566176	0.253448	-0.223389	0.823233	0.933787
ENSSSCG00000027232	72.0729	-1.37787	0.789066	-1.7462	0.080776	0.315307
GPR176	162.65	0.445648	0.608159	0.732781	0.463692	0.735236
DPH6	351.86	-0.272297	0.153644	-1.77226	0.0763511	0.306091
MED27	258.768	-0.108198	0.230754	-0.46889	0.639148	0.842598
ENSSSCG00000004786	1.05216	1.41181	2.07543	0.68025	0.496346	NA
ENSSSCG00000057289	2.06392	-0.320445	1.32868	-0.241175	0.80942	NA
FSIP1	50.9398	-4.69607	1.3756	-3.41384	NA	NA
ENSSSCG00000059601	1.17356	-0.82113	2.66702	-0.307883	0.758171	NA
LRRC9	90.8568	-5.50387	1.69196	-3.25295	NA	NA
AQR	967.226	-0.365475	0.148296	-2.4645	0.0137203	0.12044
THBS1	3559.94	2.97338	0.893773	3.32677	0.000878591	0.0215032
PRRX2	309.509	3.41265	1.19322	2.86003	NA	NA
PTGES	1508.01	1.65957	0.65484	2.53431	0.0112668	0.107219
ENSSSCG00000061897	10.5667	2.23052	2.169	1.02837	0.303777	0.60824
DBH	137.388	1.61394	0.826138	1.9536	0.0507486	0.246905
PCNX4	848.93	-1.02551	0.511709	-2.00408	0.0450613	0.230797
RASGRP1	805.077	1.15686	0.838115	1.38031	0.167492	0.455037
SARDH	40.0387	1.64372	0.447905	3.66979	0.000242749	0.00899667
DHRS7	537.142	0.186653	0.286297	0.651956	0.51443	0.768028
ZNF770	380.927	-0.208284	0.283533	-0.734603	0.462581	0.7344
FAM98B	728.859	-0.0473843	0.348853	-0.135829	0.891957	0.961464
PPM1A	1575.08	0.32971	0.208794	1.57912	0.114309	0.376335
VAV2	1370.02	-0.80903	0.667812	-1.21146	0.225718	0.529511
ACTC1	11.9144	2.69464	1.25283	2.15085	0.0314878	0.189703
SPRED1	884.681	0.257918	0.375833	0.686257	0.492551	0.754121
C14orf39	6.90849	-0.905263	1.11863	-0.809258	0.418367	0.703032
TGM5	20.7325	3.58692	0.714515	5.02007	5.16524e-07	9.02622e-05
SCAI	141.641	0.0148031	0.612062	0.0241855	0.980705	0.993185
SIX6	1.90854	-1.12764	1.49886	-0.752331	0.451852	NA
SIX1	2398.69	-1.17526	1.02321	-1.1486	0.250722	0.557279
SIX4	1032.42	-1.87943	0.924787	-2.03229	0.0421247	0.22331
MNAT1	494.658	-0.221087	0.360136	-0.613899	0.539282	0.784192
PPP6C	1364.86	0.20877	0.120284	1.73565	0.0826259	0.319263
ENSSSCG00000004806	285.964	0.53338	0.752328	0.708973	0.478341	0.745979
TRMT5	350.142	-0.147431	0.28166	-0.523434	0.600672	0.821937
NDN	358.319	0.753124	0.659981	1.14113	0.253816	0.560442
RABEPK	238.634	-0.219098	0.372831	-0.58766	0.556761	0.795446
ENSSSCG00000057776	0.142313	-0.561077	4.08047	-0.137503	0.890633	NA
SLC38A6	290.022	-0.0610975	0.328227	-0.186144	0.852332	0.94658
ENSSSCG00000050569	2.48902	0.862089	1.20456	0.715689	0.474183	NA
ENSSSCG00000030003	2.03914	-0.336819	1.88445	-0.178736	0.858145	NA
HSPA5	6720.3	-0.646411	0.241628	-2.67524	0.00746765	0.0836169
ENSSSCG00000054331	32.1363	0.366655	1.02999	0.355977	0.721858	0.888777
ENSSSCG00000055023	11.508	0.0389067	0.624694	0.0622812	0.950339	0.982184
EPB42	16.3785	1.58088	1.09786	1.43997	0.149877	0.430632
ENSSSCG00000062007	0.35817	0.400704	4.08047	0.0982003	0.921773	NA
ENSSSCG00000005095	1087.05	0.767242	0.392449	1.95501	0.0505816	0.246519
ENSSSCG00000062543	0.435508	-2.04216	2.76987	-0.737275	0.460955	NA
ENSSSCG00000059867	0.32709	0.400704	4.08047	0.0982003	0.921773	NA
ENSSSCG00000054502	0.664513	-1.1195	3.9691	-0.282053	0.777903	NA
ENSSSCG00000057411	0.142313	-0.561077	4.08047	-0.137503	0.890633	NA
ENSSSCG00000056845	583.59	-0.559805	0.781194	-0.716602	0.47362	0.742543
ENSSSCG00000054105	0.863776	-3.03209	2.324	-1.30468	0.192	NA
ENSSSCG00000059729	9201.13	2.16385	1.2005	1.80246	0.0714727	0.296712
ENSSSCG00000044231	2.45547	-1.7205	1.2748	-1.34963	0.177136	NA
GAPVD1	1846.08	0.18798	0.239591	0.784588	0.432695	0.713356
ENSSSCG00000049674	7.83662	0.294043	1.52998	0.192187	0.847595	0.944177
GPR135	4.13401	0.258199	1.28996	0.200161	0.841355	NA
ENSSSCG00000060230	9.48592	0.139886	0.60032	0.233019	0.815747	0.93127
ENSSSCG00000052653	2.79971	-2.72022	1.61398	-1.68541	0.0919099	NA
ENSSSCG00000051349	1.04274	-2.07311	1.92478	-1.07706	0.281452	NA
ENSSSCG00000061900	1241.11	-0.403203	0.689743	-0.58457	0.558837	0.796388
ENSSSCG00000058387	2.26907	-2.36084	1.93799	-1.21819	0.223152	NA
ENSSSCG00000060612	2.96733	0.305264	1.31681	0.231821	0.816677	NA
ENSSSCG00000058001	0.462263	-0.470633	4.03998	-0.116494	0.907261	NA
ENSSSCG00000058801	7.47455	1.4075	0.962007	1.46309	0.143444	0.42179
ENSSSCG00000054165	0.215857	1.36248	4.08047	0.333902	0.738454	NA
ENSSSCG00000056778	101.216	-0.573277	0.474637	-1.20782	0.227116	0.531377
ENSSSCG00000052302	0.35817	0.400704	4.08047	0.0982003	0.921773	NA
ENSSSCG00000061428	0.291865	-1.4638	4.03716	-0.362581	0.716918	NA
ENSSSCG00000046956	0.507722	-0.500821	2.8213	-0.177514	0.859104	NA
ENSSSCG00000054064	0.284627	-1.43241	4.03998	-0.354559	0.72292	NA
ENSSSCG00000042837	8.8688	0.0637183	0.614042	0.103769	0.917353	0.970168
CCNDBP1	810.951	0.437319	0.313656	1.39426	0.163239	0.450008
ENSSSCG00000051146	6.63168	0.234203	0.703426	0.332946	0.739175	0.897387
ENSSSCG00000056613	0.619054	-1.09583	2.73413	-0.400798	0.688569	NA
ENSSSCG00000061741	12.3054	-0.224637	0.894745	-0.251062	0.801766	0.925279
ENSSSCG00000055676	1.08018	1.41772	2.00702	0.706378	0.479953	NA
ENSSSCG00000057575	0.177636	1.36248	4.08047	0.333902	0.738454	NA
ENSSSCG00000051993	0.42694	-2.01623	3.99614	-0.504544	0.613879	NA
TMEM62	421.636	0.0135348	0.579172	0.0233692	0.981356	0.993185
ENSSSCG00000054949	2.61753	-0.696998	1.53618	-0.453723	0.650028	NA
ENSSSCG00000051867	0.548857	1.33836	2.79575	0.478712	0.632144	NA
ENSSSCG00000060976	342.551	0.422363	0.394759	1.06993	0.284652	0.590404
ENSSSCG00000053803	9.52611	-0.313555	0.884239	-0.354604	0.722886	0.889394
ENSSSCG00000048238	0.183448	1.36248	4.08047	0.333902	0.738454	NA
ENSSSCG00000049905	0.325761	0.400704	4.08047	0.0982003	0.921773	NA
ENSSSCG00000057176	1.01826	0.409406	1.73641	0.235777	0.813606	NA
ENSSSCG00000059483	0.149552	-0.561077	4.08047	-0.137503	0.890633	NA
ENSSSCG00000048005	0.143642	-0.561077	4.08047	-0.137503	0.890633	NA
ENSSSCG00000054862	0.177636	1.36248	4.08047	0.333902	0.738454	NA
ENSSSCG00000057545	21.4869	-1.30615	1.11188	-1.17472	0.240106	0.546252
ENSSSCG00000051207	0.321278	0.400704	4.08047	0.0982003	0.921773	NA
ENSSSCG00000060694	4.52739	3.21727	1.35352	2.37696	0.017456	NA
ENSSSCG00000053134	13.6052	0.280984	0.58095	0.483664	0.628625	0.836727
ENSSSCG00000062562	7.51333	1.44608	0.961827	1.50347	0.132717	0.405363
ENSSSCG00000062715	31.8993	0.601848	1.23369	0.487843	0.625661	0.835303
ENSSSCG00000053298	11.394	0.13711	1.15493	0.118717	0.905499	0.966957
ENSSSCG00000046397	3.50264	1.01686	1.35202	0.752105	0.451988	NA
ENSSSCG00000026014	2.08873	-0.809923	1.62483	-0.498465	0.618156	NA
ENSSSCG00000061720	7.39056	-0.930619	1.46913	-0.633451	0.526439	0.775992
ENSSSCG00000055525	15.2629	-0.189265	0.686388	-0.27574	0.782747	0.917727
ENSSSCG00000062037	1.98692	-0.063355	1.50503	-0.0420955	0.966423	NA
ENSSSCG00000059991	2.0513	-0.791677	1.89571	-0.417614	0.676229	NA
ENSSSCG00000057496	180.737	2.68404	1.29012	2.08046	NA	NA
ENSSSCG00000043508	0.142313	-0.561077	4.08047	-0.137503	0.890633	NA
ENSSSCG00000051017	0.504726	1.2356	2.80066	0.441182	0.659081	NA
LRRC28	1181.01	0.53335	0.442919	1.20417	0.228524	0.532636
UBR1	1372.97	0.281491	0.332392	0.846865	0.39707	0.686454
TTBK2	195.619	-1.01518	0.595489	-1.70479	0.0882337	0.329762
ENSSSCG00000061305	58.6146	-0.813338	0.615353	-1.32174	0.186254	0.481682
NTMT1	338.396	-0.200856	0.222444	-0.902947	0.366554	0.662508
CDAN1	553.879	-0.197581	0.221385	-0.892477	0.372138	0.667247
ENSSSCG00000022039	135.643	1.03205	0.511945	2.01593	0.0438074	0.227833
ASB6	433.743	0.410113	0.168881	2.42842	0.0151647	0.127079
ENSSSCG00000044105	49.4632	1.11302	0.500944	2.22185	0.0262936	0.172876
ENSSSCG00000044127	18.986	0.521378	0.728344	0.71584	0.47409	0.742646
ADAMTSL2	24.264	3.02405	0.997155	3.03268	0.00242394	0.0414132
C9orf78	970.356	0.00928297	0.165168	0.0562031	0.95518	0.98385
HAUS2	294.65	0.212128	0.180803	1.17325	0.240694	0.546367
MAPKAP1	1281.02	0.0463616	0.163758	0.283111	0.777092	0.915091
LRRC57	532.856	1.13186	0.396792	2.85252	0.00433746	0.0595444
SNAP23	1145.06	0.301938	0.171493	1.76064	0.0782991	0.310234
PBX3	669.786	0.856229	0.759871	1.12681	0.259823	0.566512
MVB12B	358.286	0.0717371	0.576622	0.124409	0.900991	0.965642
ZBTB43	584.191	-0.138574	0.323886	-0.427847	0.668762	0.859095
ZBTB34	360.089	-0.324028	0.178504	-1.81524	0.0694868	0.292228
RALGPS1	202.269	-1.23021	0.393899	-3.12315	0.00178926	0.0342868
ZNF106	1013.43	-0.0303149	0.179806	-0.168598	0.866113	0.952663
CAPN3	71.9245	0.479108	0.627525	0.763488	0.445173	0.723073
ANGPTL2	2886.63	1.77864	0.9526	1.86715	0.0618811	0.274205
ASS1	287.851	2.24351	0.613443	3.65724	0.000254945	0.0092654
FUBP3	1086.06	0.0407432	0.186441	0.218531	0.827015	0.935257
ENSSSCG00000004729	281.119	-0.865253	0.413448	-2.09277	0.0363693	0.20491
TMEM87A	2161.17	-0.567394	0.37107	-1.52907	0.126246	0.395352
ENSSSCG00000033472	4.85686	-2.04807	1.07868	-1.89868	0.0576067	NA
VPS39	1558.9	0.0655875	0.111849	0.586395	0.55761	0.795986
ENSSSCG00000004746	493.068	-3.35699	0.824609	-4.07101	4.68101e-05	0.00268489
AK8	137.616	-1.68792	1.05054	-1.60671	0.108117	0.365675
SPACA9	304.963	-4.35393	1.45399	-2.99446	0.00274927	0.0447664
RTF1	1809.36	0.0278834	0.269546	0.103446	0.917609	0.970378
TSC1	1485.99	0.486192	0.479273	1.01444	0.310374	0.614444
DUT	482.445	0.508842	0.315344	1.61361	0.106612	0.363287
PRDM12	0.291865	-1.4638	4.03716	-0.362581	0.716918	NA
SLC12A1	13.1871	-0.0470253	0.698765	-0.0672977	0.946345	0.980649
EXOSC2	254.217	-0.591406	0.362411	-1.63187	0.102708	0.35709
BAHD1	958.883	0.0377554	0.225864	0.16716	0.867244	0.95285
GFI1B	3.01193	-1.66304	1.76342	-0.943077	0.345642	NA
NDUFAF1	832.93	-0.226767	0.199754	-1.13523	0.256277	0.562709
ENSSSCG00000035544	923.666	0.472784	0.70656	0.669136	0.503409	0.760321
ABL1	4855.04	0.162828	0.86492	0.188258	0.850674	0.945429
OIP5	359.67	0.504992	0.186461	2.7083	0.0067629	0.0789536
ENSSSCG00000032110	688.201	-0.025836	0.176117	-0.146698	0.88337	0.959114
FIBCD1	5.46178	-3.09772	1.61353	-1.91985	0.0548771	0.256341
CHP1	5002.57	-0.065279	0.542136	-0.120411	0.904158	0.966885
LAMC3	3513.94	0.916521	0.915512	1.0011	0.316777	0.620492
EXD1	65.403	0.240656	0.467091	0.515222	0.606398	0.825251
CEL	64.8709	1.19576	0.837232	1.42823	0.153225	0.435868
INO80	822.321	-0.420568	0.210947	-1.99371	0.0461832	0.234278
CHAC1	11.8652	1.19452	0.849929	1.40544	0.159892	0.444346
AIF1L	1217.71	3.91094	1.17736	3.32179	0.00089442	0.0216393
DLL4	310.579	1.10308	0.557138	1.97991	0.0477138	0.238188
[truncated: 22,959 more rows]

## Sheet: MDY vs MEY
Analysis of differentially expressed genes in MDY vs. MEY
gene	baseMean	log2FoldChange	lfcSE	stat	pvalue	padj
ALDH1A1	2456.74	2.116	0.874213	2.42046	0.0155007	0.0609776
ANXA1	23443	1.79851	0.610493	2.94599	0.00321923	0.0185315
RORB	40.5154	5.67948	1.77369	3.20206	NA	NA
TRPM6	22.7948	1.33246	0.930553	1.4319	0.152172	0.308764
C9orf40	221.172	0.576284	0.353986	1.62798	0.103528	0.2375
CARNMT1	732.388	0.441572	0.454634	0.971269	0.331415	0.516801
NMRK1	137.247	-0.301187	0.329478	-0.914134	0.360646	0.545366
OSTF1	1576.68	-0.723839	0.648838	-1.11559	0.264596	0.447016
PCSK5	70.7731	0.953737	0.618331	1.54244	0.122967	0.267285
ENSSSCG00000057774	15.597	-0.541587	0.690259	-0.784613	0.43268	0.612616
RFK	1165.25	1.84603	0.683192	2.70207	0.00689101	0.0332161
GCNT1	500.596	4.1667	0.799631	5.21078	1.88051e-07	5.14893e-06
ENSSSCG00000039009	877.682	6.72217	1.35169	4.97317	NA	NA
ENSSSCG00000060679	91.3133	7.62072	1.90807	3.99395	NA	NA
ENSSSCG00000005279	0.162514	0.997819	4.08047	0.244535	0.806816	NA
VPS13A	620.885	-0.42407	0.283372	-1.49651	0.13452	0.283324
GRIK2	4.3627	0.325553	1.12149	0.290287	0.771597	0.867896
FAXC	301.813	0.405667	0.503514	0.805672	0.420432	0.601395
LMBRD1	885.995	-0.889035	0.357259	-2.48849	0.0128288	0.0533333
PNISR	1350.91	0.797822	0.172569	4.62321	3.77853e-06	7.28532e-05
COL19A1	15.0315	-2.61675	0.841698	-3.10889	0.0018779	0.0122797
ENSSSCG00000004261	0.957114	-1.00662	2.14717	-0.468813	0.639203	NA
USP45	267.441	-0.00541721	0.252641	-0.0214423	0.982893	0.991299
KPNA5	150.732	0.34059	0.355107	0.959119	0.337499	0.52307
ENSSSCG00000038757	241.15	-0.68733	0.243032	-2.82814	0.0046819	0.0246698
CCNC	1056.04	-0.732753	0.331248	-2.2121	0.0269596	0.0914016
GNA14	587.126	3.38964	0.479985	7.06197	1.64157e-12	1.26739e-10
ENSSSCG00000050902	0.312395	1.79486	4.04758	0.44344	0.657448	NA
ZUP1	252.277	0.702804	0.333551	2.10704	0.0351145	0.110665
ABHD17B	608.027	0.309067	0.515205	0.599891	0.548579	0.71169
C9orf85	124.43	0.430138	0.495978	0.867253	0.385803	0.570132
ENSSSCG00000004355	9.84188	0.130866	0.865546	0.151194	0.879822	0.933093
GDA	202.503	-8.66547	1.08896	-7.95757	1.75452e-15	2.06288e-13
RSPH4A	5.19447	0.18126	0.853836	0.212289	0.831882	0.905112
ENSSSCG00000031854	0.7946	-1.83189	2.69565	-0.679572	0.496775	NA
PTP4A1	2248.65	-0.0767359	0.49985	-0.153518	0.87799	0.932176
ZFAND5	4205.33	1.51821	0.293528	5.17228	2.3126e-07	6.19992e-06
KLHL32	18.4512	0.958527	1.20747	0.793834	0.427292	0.607518
TMC1	11.2968	1.44891	1.00918	1.43572	0.151081	0.307269
ENSSSCG00000004246	84.2969	-0.979808	0.301603	-3.24867	0.00115946	0.00840015
ASF1A	355.683	-0.840765	0.257135	-3.26975	0.00107644	0.00792638
CEP85L	163.976	0.102688	0.752857	0.136398	0.891507	0.940109
TLE4	1009.03	-0.128176	0.398409	-0.321719	0.747666	0.852562
TXNDC16	99.1703	1.55026	0.786977	1.96989	0.0488504	0.140722
ENSSSCG00000044405	0.165384	-0.925735	4.08047	-0.226869	0.820525	NA
ENSSSCG00000062089	819.844	4.19588	1.39324	3.01159	NA	NA
GPR137C	1.7819	0.37898	1.51088	0.250833	0.801943	NA
GJA1	14843	-1.63971	0.847615	-1.9345	0.0530522	0.148885
ERO1A	3534.79	2.61712	0.664215	3.94017	8.14251e-05	0.000984379
TBC1D32	254.624	0.50927	0.328719	1.54926	0.121319	0.26492
ENSSSCG00000035799	0.495169	0.847818	2.91349	0.290997	0.771054	NA
TLE1	1539.55	1.96855	0.250643	7.854	4.02983e-15	4.42028e-13
PSMC6	1726.05	-0.380377	0.303394	-1.25374	0.209937	0.382745
FAM184A	19.8162	-1.95837	1.33534	-1.46656	0.142495	0.294694
ENSSSCG00000033805	15.6782	2.32286	1.12553	2.0638	0.0390365	0.119502
ENSSSCG00000037497	0.331342	-1.8256	4.03773	-0.452136	0.651171	NA
GNAQ	1539.72	3.20562	0.346335	9.25582	2.12593e-20	4.55278e-18
MMS22L	74.6548	-0.712039	0.499704	-1.42492	0.15418	0.311425
CEP78	187.377	-0.0906585	0.259345	-0.349567	0.726664	0.839668
COL9A1	1.98182	-4.41347	2.88615	-1.52919	0.126217	NA
STYX	597.014	-0.0583624	0.255462	-0.228458	0.81929	0.896703
GNPNAT1	335.831	-0.193211	0.447983	-0.431291	0.666257	0.798806
SLC35F1	22.1515	-0.767544	0.958792	-0.800532	0.423402	0.604443
PSAT1	3820.2	-1.81344	0.782749	-2.31675	0.0205171	0.0748949
FERMT2	3684.41	4.03167	1.1669	3.45503	NA	NA
NUS1	1313.35	-0.840606	0.478226	-1.75776	0.0787883	0.196932
ENSSSCG00000043640	0.165384	-0.925735	4.08047	-0.226869	0.820525	NA
ENSSSCG00000004253	867.93	-0.119959	0.243413	-0.49282	0.62214	0.765907
ENSSSCG00000044537	0.879091	-3.22835	3.39604	-0.950621	0.341797	NA
ENSSSCG00000056780	0.162514	0.997819	4.08047	0.244535	0.806816	NA
ENSSSCG00000060009	133.347	-1.31455	0.666616	-1.97198	0.0486118	0.140267
ENSSSCG00000054181	12.8413	2.48307	1.02895	2.4132	0.0158132	0.0619612
ENSSSCG00000062298	7.36548	0.995172	0.937868	1.0611	0.288644	0.472941
ENSSSCG00000049009	0.347296	0.036046	4.08047	0.00883378	0.992952	NA
ENSSSCG00000062781	0.7587	3.04527	3.60731	0.844193	0.398562	NA
ENSSSCG00000063502	0.315265	0.036046	4.08047	0.00883378	0.992952	NA
ENSSSCG00000062448	0.165384	-0.925735	4.08047	-0.226869	0.820525	NA
HACE1	851.579	0.52497	0.493783	1.06316	0.287709	0.472089
DDHD1	517.613	1.05678	0.227332	4.64864	3.34139e-06	6.59805e-05
ENSSSCG00000053831	0.182774	-0.925735	4.08047	-0.226869	0.820525	NA
DCBLD1	783.821	-0.49687	0.478628	-1.03811	0.299217	0.483874
ENSSSCG00000061420	0.330768	-1.82518	4.03777	-0.452026	0.65125	NA
ROS1	0.644719	-2.79086	3.70283	-0.75371	0.451024	NA
BMP4	191.266	0.825736	0.762007	1.08363	0.278527	0.463191
CDKN3	102.561	-0.221923	0.485684	-0.456929	0.647722	0.785583
ENSSSCG00000019939	0.608215	-1.30926	3.88198	-0.337267	0.735916	NA
BVES	336.516	3.50958	1.23529	2.8411	NA	NA
CNIH1	1460.68	0.448264	0.576617	0.777404	0.43692	0.616328
POPDC3	56.4338	0.51934	1.04729	0.49589	0.619972	0.764458
RFX6	7.44435	-1.29583	1.38865	-0.933156	0.350739	0.536381
PREP	1454.99	-1.23359	0.447085	-2.75919	0.00579446	0.0289787
GMFB	1249.41	-0.128911	0.467653	-0.275656	0.782813	0.875152
ENSSSCG00000053030	0.809814	-1.76811	2.66243	-0.664095	0.50663	NA
MANEA	244.203	-0.0569174	0.368075	-0.154635	0.877109	0.931879
FAM162B	46.5956	-0.476158	1.30538	-0.364767	0.715286	0.832618
PHF3	2070.64	0.93979	0.266533	3.52598	0.000421921	0.00382172
CGRRF1	261.012	-0.0205813	0.357098	-0.057635	0.954039	0.975902
RPS29	3477.77	-0.649884	0.32888	-1.97605	0.0481487	0.139386
ENSSSCG00000042849	0.546887	-0.917443	2.89324	-0.317099	0.751168	NA
UFL1	946.538	0.0621184	0.343239	0.180977	0.856386	0.919682
LRR1	115.925	-0.2753	0.339722	-0.81037	0.417728	0.599069
MAN1A1	524.756	-1.98792	0.848524	-2.34279	0.0191401	0.0713155
FBXL4	418.04	0.423207	0.33719	1.2551	0.209443	0.382193
SIM1	19.8667	-2.59625	1.38126	-1.87962	0.0601592	0.162567
RPL36AL	1704.88	-0.615788	0.406534	-1.51473	0.129842	0.27704
FAM135A	1906.99	-0.724618	0.548232	-1.32174	0.186256	0.353658
MGAT2	211.835	0.108081	0.382959	0.282228	0.777769	0.87206
ENSSSCG00000058931	263.712	-0.10918	0.359818	-0.303432	0.761561	0.860958
DNAAF2	29.8146	-1.68316	0.561973	-2.99509	0.00274366	0.0163052
ASCC3	1159.51	0.247245	0.197439	1.25226	0.210476	0.383379
ADGRB3	1.79626	-0.821917	1.47722	-0.556393	0.577942	NA
KLHDC1	139.498	0.171999	0.368625	0.466596	0.640789	0.780126
LRFN5	142.133	5.49993	1.07166	5.13215	2.86456e-07	7.46821e-06
FHL5	64.3353	0.185796	0.790764	0.234958	0.814242	0.893297
ENSSSCG00000055064	0.162514	0.997819	4.08047	0.244535	0.806816	NA
ENSSSCG00000058693	2.30619	-0.710686	1.78439	-0.39828	0.690424	0.815927
KLHDC2	869.424	0.324663	0.321043	1.01128	0.311884	0.495714
ENSSSCG00000043582	0.182774	-0.925735	4.08047	-0.226869	0.820525	NA
GPR63	110.197	3.84256	1.38923	2.76596	NA	NA
NEMF	828.597	0.656452	0.279425	2.3493	0.0188089	0.0703116
RAB11A	7712.66	0.221133	0.541251	0.408559	0.682864	0.811095
NDUFAF4	85.0894	-0.836539	0.401831	-2.08182	0.0373591	0.115791
ENSSSCG00000054004	2.17845	-1.06612	1.37328	-0.776331	0.437554	0.616772
ENSSSCG00000056940	0.992015	-2.13434	2.51263	-0.849444	0.395634	NA
ENSSSCG00000056101	0.148567	-0.925735	4.08047	-0.226869	0.820525	NA
ENSSSCG00000060433	0.165384	-0.925735	4.08047	-0.226869	0.820525	NA
ENSSSCG00000062752	0.165384	-0.925735	4.08047	-0.226869	0.820525	NA
ENSSSCG00000045756	0.162514	0.997819	4.08047	0.244535	0.806816	NA
ARF6	5581.42	0.0834222	0.467052	0.178614	0.85824	0.920735
ENSSSCG00000043532	0.348158	-1.88921	4.03218	-0.468534	0.639403	NA
ENSSSCG00000045405	12.6585	-0.559278	0.636247	-0.879026	0.379387	0.563567
RTRAF	2285.91	0.458661	0.443079	1.03517	0.300591	0.485152
ENSSSCG00000061626	0.182774	-0.925735	4.08047	-0.226869	0.820525	NA
ENSSSCG00000060707	0.892175	-0.565012	2.19903	-0.256937	0.797228	NA
ENSSSCG00000060554	0.938983	-2.10818	2.53023	-0.833196	0.404734	NA
NID2	790.969	2.30915	1.32682	1.74036	NA	NA
ENSSSCG00000053196	0.148567	-0.925735	4.08047	-0.226869	0.820525	NA
MEGF11	6.19728	-0.643144	1.01562	-0.633253	0.526568	0.694104
ENSSSCG00000059926	1.05957	-0.8289	2.09894	-0.394913	0.692907	NA
ENSSSCG00000059866	0.397457	2.0983	4.02129	0.521797	0.601812	NA
ENSSSCG00000057054	135.748	0.919555	0.903292	1.018	0.308676	0.492529
PTGER2	177.77	1.9336	0.845209	2.28772	0.0221541	0.0792464
FRMD6	2449.34	-0.0718062	0.42518	-0.168884	0.865888	0.926067
ENSSSCG00000057794	0.149881	0.997819	4.08047	0.244535	0.806816	NA
ENSSSCG00000055234	0.148567	-0.925735	4.08047	-0.226869	0.820525	NA
ENSSSCG00000028092	561.189	0.149108	0.284417	0.524258	0.600099	0.749757
DIS3L	365.356	0.198053	0.298626	0.663212	0.507195	0.677848
TIPIN	104.449	-0.782785	0.496198	-1.57757	0.114665	0.255539
ENSSSCG00000046948	0.148567	-0.925735	4.08047	-0.226869	0.820525	NA
MAP2K1	1010.16	1.09427	0.384963	2.84252	0.00447584	0.023772
VCPKMT	135.995	-0.617197	0.464002	-1.33016	0.183466	0.350189
SOS2	1098.85	0.381783	0.310013	1.23151	0.218134	0.392513
ENSSSCG00000050792	0.473595	0.882778	4.0429	0.218353	0.827154	NA
L2HGDH	377.377	-1.04605	0.420431	-2.48805	0.0128445	0.0533604
DMAC2L	149.675	-0.325628	0.282253	-1.15367	0.248634	0.428089
SNAPC5	88.3314	-0.57776	0.445388	-1.2972	0.194561	0.364237
RPL4	27722.9	-0.928258	0.421559	-2.20197	0.0276678	0.0929268
CTDP1	1018.08	-0.077035	0.242354	-0.317862	0.75059	0.854362
CDKL1	242.213	3.50368	1.39555	2.51061	NA	NA
NETO1	0.473595	0.882778	4.0429	0.218353	0.827154	NA
MAP4K5	1298.96	-0.190596	0.277476	-0.686892	0.492151	0.665512
PCSK6	980.112	-3.18377	0.689212	-4.61944	3.84782e-06	7.39513e-05
ZWILCH	138.963	-0.379216	0.380555	-0.996482	0.319016	0.503186
ENSSSCG00000048049	0.652925	1.46574	3.83663	0.382039	0.702432	NA
ATL1	87.3428	0.0265972	0.400027	0.0664887	0.946989	0.971547
SNRPA1	513.837	-0.584011	0.265557	-2.19919	0.0278644	0.0934477
ENSSSCG00000051767	0.825937	-0.653211	2.18987	-0.298288	0.765484	NA
LCTL	4.78723	-0.0541281	1.00278	-0.0539783	0.956952	0.977449
SMAD6	62.3231	1.98408	0.527344	3.7624	0.000168292	0.00180203
TLE3	2232.03	-0.525711	0.465114	-1.13028	0.258356	0.439653
SAV1	639.061	0.57279	0.240271	2.38393	0.0171288	0.0655736
MBP	1345.09	-0.709305	0.562973	-1.25993	0.207695	0.379929
ENSSSCG00000004963	1119.18	-0.099666	0.228833	-0.43554	0.66317	0.796859
NIN	592.482	0.136667	0.454731	0.300544	0.763762	0.862167
SPESP1	0.148567	-0.925735	4.08047	-0.226869	0.820525	NA
NOX5	53.175	-0.841873	1.22402	-0.687794	0.491583	0.664993
GLCE	873.588	-0.28245	0.427626	-0.660506	0.508929	0.679505
PAQR5	227.726	-2.28944	0.943378	-2.42685	0.0152304	0.0603081
PYGL	5874.09	-0.439564	0.377077	-1.16571	0.24373	0.422639
KIF23	308.836	-0.421755	0.506538	-0.832622	0.405058	0.587723
ENSSSCG00000004970	17180.3	-0.845856	0.515635	-1.64042	0.100918	0.233135
ZNF236	584.956	-0.0385879	0.327929	-0.117671	0.906328	0.948046
SMAD3	1771.27	0.888346	0.273614	3.24671	0.00116746	0.00844107
ABHD12B	535.508	-5.29228	0.45226	-11.7019	1.24685e-31	8.97184e-29
ZNF516	562.671	1.93169	0.810944	2.38203	0.0172175	0.0658431
TRIM9	25.3516	3.14127	0.832842	3.77175	0.000162108	0.00174621
NFATC1	682.259	-0.643854	0.708161	-0.909192	0.363249	0.547701
AAGAB	975.224	0.124371	0.462736	0.268773	0.788104	0.879043
TMX1	1452.86	-0.547782	0.301704	-1.81563	0.0694275	0.180221
ENSSSCG00000057448	0.348158	-1.88921	4.03218	-0.468534	0.639403	NA
C15orf61	89.403	0.338889	0.528502	0.641226	0.521376	0.689939
MDGA2	2.25131	0.578711	1.93709	0.298752	0.765129	0.862887
MAP2K5	502.198	0.748144	0.247896	3.01797	0.00254474	0.0153843
C14orf28	206.257	0.0569171	0.32901	0.172995	0.862655	0.92389
KLHL28	538.377	0.847576	0.284587	2.97827	0.00289885	0.0170806
TOGARAM1	941.566	1.19424	0.345504	3.4565	0.00054723	0.00467432
ATP9B	845.827	-0.446854	0.27994	-1.59625	0.110433	0.248913
SKOR1	5.01896	-0.616387	1.14434	-0.53864	0.590136	0.742478
PRPF39	781.351	-0.552324	0.211776	-2.60805	0.00910586	0.0412873
FKBP3	675.283	-0.626475	0.395926	-1.5823	0.113581	0.254035
PIAS1	673.692	0.803147	0.199933	4.01709	5.89215e-05	0.000755481
ENSSSCG00000040521	0.529497	-0.863393	3.97877	-0.217	0.828208	NA
FANCM	66.5628	0.0596012	0.491649	0.121227	0.903511	0.946769
SALL3	2.72294	1.24701	1.5123	0.824582	0.409609	0.591829
CALML4	662.829	3.76469	0.418317	8.99962	2.26507e-19	4.2444e-17
ENSSSCG00000060932	1.03988	0.165717	2.09991	0.0789163	0.937099	NA
CLN6	917.748	1.32032	0.514721	2.56511	0.0103142	0.0452815
TSHZ1	893.986	0.976142	0.310241	3.1464	0.00165291	0.0111303
ZADH2	1053.9	-0.0655897	0.369833	-0.17735	0.859234	0.921636
ENSSSCG00000053589	65.1987	0.912008	0.318289	2.86534	0.00416558	0.0225299
MIS18BP1	361.75	0.164964	0.438884	0.375872	0.707012	0.827702
ENSSSCG00000063467	305.011	1.19073	0.325079	3.6629	0.000249373	0.00247843
ENSSSCG00000055454	0.348609	1.92911	4.03529	0.47806	0.632608	NA
CNDP1	449.52	-0.448372	0.918359	-0.488232	0.625386	0.768395
FEM1B	1237.31	-0.433436	0.243658	-1.77887	0.0752614	0.190983
ENSSSCG00000060134	0.162514	0.997819	4.08047	0.244535	0.806816	NA
ENSSSCG00000060555	0.69201	0.101654	2.8284	0.0359405	0.97133	NA
ITGA11	476.619	4.47658	1.14227	3.91903	8.89067e-05	0.00105627
ENSSSCG00000055510	0.162514	0.997819	4.08047	0.244535	0.806816	NA
ENSSSCG00000047397	0.162514	0.997819	4.08047	0.244535	0.806816	NA
CORO2B	290.553	0.78411	0.707752	1.10789	0.26791	0.450676
ENSSSCG00000043563	294.239	-0.705312	0.394662	-1.78713	0.0739168	0.188501
ENSSSCG00000062712	0.823067	0.510697	2.18494	0.233735	0.815191	NA
ENSSSCG00000051922	0.952687	2.16777	2.5181	0.860876	0.389306	NA
ENSSSCG00000063237	11.3164	-1.67266	0.623127	-2.68431	0.00726806	0.0347357
ENSSSCG00000063081	27.6565	0.467145	0.453817	1.02937	0.303307	0.487469
ENSSSCG00000056226	5.9455	-0.162294	0.780356	-0.207974	0.835249	0.90716
ENSSSCG00000049234	11.7529	0.907617	1.15799	0.783789	0.433164	0.613076
ENSSSCG00000062074	2.6313	0.36404	1.15188	0.31604	0.751972	0.855342
ENSSSCG00000019885	0.873351	-0.73025	3.69392	-0.19769	0.843288	NA
CNDP2	6039.79	0.778047	0.685518	1.13498	0.256385	0.437084
ENSSSCG00000057267	1.09377	-0.859127	2.59151	-0.331516	0.740255	NA
ENSSSCG00000059807	1.67824	3.07712	2.35612	1.30601	0.191548	NA
DIPK1C	6.46176	-2.37424	1.7059	-1.39178	0.163988	0.324443
UACA	1485.63	1.5927	0.209392	7.6063	2.82048e-14	2.80318e-12
MPHOSPH10	455.497	-0.874557	0.308874	-2.83144	0.00463388	0.024467
MCEE	206.437	-0.740564	0.47339	-1.56439	0.117727	0.260171
APBA2	17.3021	3.57396	1.27245	2.80871	0.00497397	0.0258305
FAM189A1	1.48357	-0.898275	1.94954	-0.460762	0.644969	NA
TJP1	7428.51	2.08633	0.341141	6.11573	9.61147e-10	4.59842e-08
LARP6	211.411	1.07712	0.533318	2.01965	0.0434199	0.129233
LRRC49	9.79487	0.123763	1.09787	0.11273	0.910245	0.950176
GALR1	19.5001	-0.613536	0.841297	-0.729274	0.465834	0.641596
THSD4	738.627	4.29566	0.513312	8.36852	5.83484e-17	8.46476e-15
CYB5A	3261.07	0.194401	0.411429	0.472501	0.636569	0.776659
NR2E3	0.325028	1.84455	4.0429	0.456244	0.648214	NA
ENSSSCG00000037781	109.492	-0.273079	0.429262	-0.636158	0.524673	0.692672
TARS3	7.48568	-3.29685	1.36955	-2.40724	0.0160735	0.0626638
MYO9A	572.585	0.307152	0.442669	0.693863	0.487768	0.661874
CBLN2	17.2834	3.16536	1.60699	1.96974	0.0488686	0.140722
TRPM1	5.10673	-4.77136	1.52786	-3.12291	0.00179072	0.0118046
SENP8	208.915	0.737287	0.432514	1.70465	0.0882592	0.21316
ENSSSCG00000026486	3.54256	0.216945	1.24058	0.174874	0.861179	0.923172
ENSSSCG00000026167	65.0638	-0.725326	0.868165	-0.835471	0.403453	0.586336
GEMIN2	206.243	0.528353	0.410111	1.28832	0.197636	0.368002
MTMR10	928.386	0.192918	0.283668	0.680085	0.49645	0.668874
TRAPPC6B	481.855	-0.11169	0.321196	-0.347732	0.728041	0.840342
FAN1	660.71	0.0414937	0.34167	0.121444	0.90334	0.946769
PNN	1705.38	0.238755	0.25538	0.9349	0.34984	0.535324
TIMM21	266.355	-0.450733	0.264122	-1.70653	0.0879092	0.212496
FBXO15	15.785	0.678607	0.660905	1.02678	0.304522	0.488544
ENSSSCG00000004983	1499.02	0.218278	0.63402	0.344276	0.730638	0.841646
SOCS6	900.313	0.521533	0.335896	1.55266	0.120504	0.263812
RTTN	331.03	1.0263	0.595237	1.72419	0.0846738	0.206984
CD226	16.6223	-1.51591	0.598752	-2.53178	0.0113485	0.0486761
DOK6	35.3957	5.38507	1.39391	3.86327	0.000111877	0.00127863
TM2D3	151.672	-0.404475	0.280338	-1.44281	0.149073	0.30439
ENSSSCG00000040252	356.305	-0.178964	0.312272	-0.573104	0.566574	0.724745
ENSSSCG00000052817	0.165384	-0.925735	4.08047	-0.226869	0.820525	NA
ENSSSCG00000041473	0.165384	-0.925735	4.08047	-0.226869	0.820525	NA
ENSSSCG00000038208	1.3396	-2.65174	2.5751	-1.02976	0.303122	NA
ENSSSCG00000063266	0.182774	-0.925735	4.08047	-0.226869	0.820525	NA
ENSSSCG00000062837	0.448329	0.782088	4.05255	0.192987	0.846969	NA
ENSSSCG00000041275	1.68839	0.244024	1.91855	0.127191	0.898789	NA
ENSSSCG00000060706	25.8265	-2.69912	0.840382	-3.21178	0.00131914	0.00930491
ENSSSCG00000054784	1.90535	0.390315	1.54658	0.252373	0.800753	NA
ENSSSCG00000034069	3.95288	-2.20098	1.34551	-1.6358	0.101881	0.234726
ENSSSCG00000060600	716.542	1.54244	0.779238	1.97941	0.0477693	0.138511
ENSSSCG00000056177	0.325028	1.84455	4.0429	0.456244	0.648214	NA
ENSSSCG00000060688	12.175	1.35411	0.833856	1.62391	0.104395	0.238866
ENSSSCG00000054425	1.1574	-2.40506	2.47344	-0.972355	0.330874	NA
ENSSSCG00000051884	0.348609	1.92911	4.03529	0.47806	0.632608	NA
ENSSSCG00000051812	0.511123	2.48494	2.80011	0.887444	0.37484	NA
ENSSSCG00000053820	0.93874	0.995506	2.06848	0.481274	0.630322	NA
ENSSSCG00000055622	0.790416	-1.80088	2.60761	-0.690627	0.4898	NA
ENSSSCG00000061734	2.57375	-0.688119	1.17945	-0.583424	0.559608	0.719621
ENSSSCG00000054884	0.562841	1.1358	3.97262	0.285908	0.774949	NA
ENSSSCG00000053207	0.148567	-0.925735	4.08047	-0.226869	0.820525	NA
ENSSSCG00000044321	0.148567	-0.925735	4.08047	-0.226869	0.820525	NA
[truncated: 24,341 more rows]
