# Supplementary material for: Deciphering Estrus Expression in Gilts: The Role of Alternative Polyadenylation and LincRNAs in Reproductive Transcriptomics
Source: Animals (Basel). 2024 Mar 4;14(5):791. doi: 10.3390/ani14050791 (PMC10931002; doi:10.3390/ani14050791)
Supplement: Supplementary file 1 [file animals-14-00791-s001.zip › Table S4.xlsx]

## Sheet: lincRNA-vulva
Differential expression analysis of lincRNA in vulva
culster	gene	log2FoldChange	pvalue
LD vs. LE	MSTRG.18.2	-0.0262713	0.994863
LD vs. LE	MSTRG.650.1	0.443679	0.767949
LD vs. LE	MSTRG.637.1	-0.988052	0.80867
LD vs. LE	MSTRG.794.1	-0.0262713	0.994863
LD vs. LE	MSTRG.795.1	0.935501	0.818665
LD vs. LE	MSTRG.868.1	0.491579	0.835046
LD vs. LE	MSTRG.1266.1	-1.63969	0.341154
LD vs. LE	MSTRG.1581.1	-0.139719	0.840724
LD vs. LE	MSTRG.1617.3	-0.482361	0.510638
LD vs. LE	MSTRG.1870.2	-0.747524	0.488337
LD vs. LE	MSTRG.2181.1	-0.781168	0.83456
LD vs. LE	MSTRG.2633.2	1.74551	0.103566
LD vs. LE	MSTRG.2685.1	0.789127	0.313401
LD vs. LE	MSTRG.2692.1	0.266439	0.740755
LD vs. LE	MSTRG.2916.1	2.0177	0.0964546
LD vs. LE	MSTRG.3359.2	-1.23807	0.0710262
LD vs. LE	MSTRG.3589.1	-0.026271	0.994785
LD vs. LE	MSTRG.242.1	-1.67524	0.224112
LD vs. LE	MSTRG.246.4	0.935501	0.818665
LD vs. LE	MSTRG.374.1	-1.39168	0.100741
LD vs. LE	MSTRG.375.1	-1.2187	0.397126
LD vs. LE	MSTRG.586.1	-0.988052	0.80867
LD vs. LE	MSTRG.590.1	-4.02083	0.161655
LD vs. LE	MSTRG.706.1	2.32995	0.530107
LD vs. LE	MSTRG.1435.1	-1.23053	0.60438
LD vs. LE	MSTRG.1449.1	-3.09202	0.232641
LD vs. LE	MSTRG.1481.1	-1.08478	0.125364
LD vs. LE	MSTRG.1587.1	0.68633	0.324716
LD vs. LE	MSTRG.1699.1	-0.748883	0.223747
LD vs. LE	MSTRG.1804.1	1.35489	0.588358
LD vs. LE	MSTRG.2174.1	0.64348	0.571177
LD vs. LE	MSTRG.2359.1	-0.816125	0.757336
LD vs. LE	MSTRG.2649.1	2.04763	0.020227
LD vs. LE	MSTRG.3244.5	-2.14478	0.0053691
LD vs. LE	MSTRG.3564.4	-1.3413	0.134893
LD vs. LE	MSTRG.3637.1	4.8202	0.0138954
LD vs. LE	MSTRG.3731.1	-0.110022	0.875076
LD vs. LE	MSTRG.4155.1	1.34436	0.453501
LD vs. LE	MSTRG.4222.1	-2.31272	0.538663
LD vs. LE	MSTRG.4263.1	-1.53063	0.605962
LD vs. LE	MSTRG.4299.1	-1.09871	0.305649
LD vs. LE	MSTRG.4391.1	0.297036	0.830106
LD vs. LE	MSTRG.4580.1	1.00508	0.370331
LD vs. LE	MSTRG.4896.1	-0.0382777	0.948782
LD vs. LE	MSTRG.5009.11	-1.19287	0.248012
LD vs. LE	MSTRG.5233.1	2.39232	0.0497557
LD vs. LE	MSTRG.4228.4	0.316854	0.681643
LD vs. LE	MSTRG.4314.1	0.0620118	0.922184
LD vs. LE	MSTRG.4377.1	-1.63088	0.203898
LD vs. LE	MSTRG.4390.1	-1.94792	0.354566
LD vs. LE	MSTRG.4454.1	-0.796475	0.812652
LD vs. LE	MSTRG.4907.1	-2.07058	0.0275584
LD vs. LE	MSTRG.5085.1	-1.04678	0.642668
LD vs. LE	MSTRG.5194.1	3.80206	0.00116126
LD vs. LE	MSTRG.5267.1	0.0119745	0.992037
LD vs. LE	MSTRG.5640.1	0.231606	0.821916
LD vs. LE	MSTRG.5838.1	0.0212675	0.991231
LD vs. LE	MSTRG.5487.1	-0.583763	0.34543
LD vs. LE	MSTRG.5675.1	-0.252199	0.690248
LD vs. LE	MSTRG.5677.1	-0.159938	0.840396
LD vs. LE	MSTRG.5779.1	0.510124	0.701194
LD vs. LE	MSTRG.6409.1	-0.649416	0.350268
LD vs. LE	MSTRG.6415.1	0.141483	0.915734
LD vs. LE	MSTRG.6477.1	3.26446	0.272029
LD vs. LE	MSTRG.6478.1	-2.84024	0.077157
LD vs. LE	MSTRG.6515.1	-0.302491	0.796463
LD vs. LE	MSTRG.6613.1	0.935501	0.818665
LD vs. LE	MSTRG.6976.1	0.935501	0.818665
LD vs. LE	MSTRG.7017.1	1.43551	0.135746
LD vs. LE	MSTRG.7268.1	0.0555753	0.936224
LD vs. LE	MSTRG.7414.1	-0.575847	0.722431
LD vs. LE	MSTRG.6482.1	-0.152983	0.955834
LD vs. LE	MSTRG.6703.1	0.934281	0.536445
LD vs. LE	MSTRG.7231.1	-1.68215	0.21407
LD vs. LE	MSTRG.7810.1	-0.391127	0.764394
LD vs. LE	MSTRG.8003.1	-0.756272	0.573145
LD vs. LE	MSTRG.8321.1	-0.624581	0.752701
LD vs. LE	MSTRG.8351.6	0.230136	0.684393
LD vs. LE	MSTRG.8418.1	1.28722	0.0902973
LD vs. LE	MSTRG.8949.1	-1.1456	0.0797242
LD vs. LE	MSTRG.9216.5	0.573566	0.355605
LD vs. LE	MSTRG.9355.2	0.653473	0.686998
LD vs. LE	MSTRG.9428.1	-1.19558	0.596772
LD vs. LE	MSTRG.9477.1	1.87194	0.0361143
LD vs. LE	MSTRG.9588.1	-0.0262713	0.994863
LD vs. LE	MSTRG.9743.1	-1.01932	0.354384
LD vs. LE	MSTRG.10034.1	1.42546	0.255314
LD vs. LE	MSTRG.10508.5	1.64318	0.0237022
LD vs. LE	MSTRG.10580.1	-2.06144	0.0974988
LD vs. LE	MSTRG.10806.2	0.853009	0.225698
LD vs. LE	MSTRG.11114.1	1.35866	0.361804
LD vs. LE	MSTRG.11377.1	0.935501	0.818665
LD vs. LE	MSTRG.8058.1	2.22374	0.359984
LD vs. LE	MSTRG.8756.1	2.32995	0.530107
LD vs. LE	MSTRG.9369.1	-1.52109	0.439887
LD vs. LE	MSTRG.9392.2	-1.23616	0.512684
LD vs. LE	MSTRG.9475.1	4.23056	0.125105
LD vs. LE	MSTRG.9497.1	3.5278	0.002461
LD vs. LE	MSTRG.10028.1	-0.388125	0.677989
LD vs. LE	MSTRG.10107.1	1.07168	0.264023
LD vs. LE	MSTRG.10440.1	0.527864	0.609059
LD vs. LE	MSTRG.10597.1	-2.84952	0.385167
LD vs. LE	MSTRG.10837.1	0.935501	0.818665
LD vs. LE	MSTRG.11133.1	-1.02168	0.22477
LD vs. LE	MSTRG.11381.1	-0.988052	0.80867
LD vs. LE	MSTRG.11781.1	-1.10284	0.173006
LD vs. LE	MSTRG.12265.1	-5.30884	0.00407974
LD vs. LE	MSTRG.12352.1	-0.0870133	0.890581
LD vs. LE	MSTRG.12447.1	1.11278	0.531825
LD vs. LE	MSTRG.12511.1	-1.14275	0.160391
LD vs. LE	MSTRG.13196.1	-2.28818	0.3394
LD vs. LE	MSTRG.13570.1	0.940026	0.799251
LD vs. LE	MSTRG.13579.1	0.22818	0.826319
LD vs. LE	MSTRG.13670.1	0.714418	0.498531
LD vs. LE	MSTRG.13803.1	-0.79019	0.697375
LD vs. LE	MSTRG.11808.2	-0.988052	0.80867
LD vs. LE	MSTRG.11883.2	0.850825	0.201271
LD vs. LE	MSTRG.12473.1	-1.84775	0.0866593
LD vs. LE	MSTRG.13136.1	-3.56527	0.152614
LD vs. LE	MSTRG.13553.1	-0.735793	0.288669
LD vs. LE	MSTRG.13847.1	1.45684	0.459424
LD vs. LE	MSTRG.14146.2	1.85331	0.0978611
LD vs. LE	MSTRG.14181.1	-0.988052	0.80867
LD vs. LE	MSTRG.14247.1	-0.910658	0.30552
LD vs. LE	MSTRG.14299.1	-0.988052	0.80867
LD vs. LE	MSTRG.14398.1	-0.228073	0.862635
LD vs. LE	MSTRG.15480.1	0.437019	0.660147
LD vs. LE	MSTRG.15627.1	3.83215	0.00378652
LD vs. LE	MSTRG.13897.2	0.935501	0.818665
LD vs. LE	MSTRG.14120.1	0.843785	0.440264
LD vs. LE	MSTRG.14276.1	-0.721039	0.328416
LD vs. LE	MSTRG.15165.2	-0.404876	0.794947
LD vs. LE	MSTRG.15233.1	-0.720917	0.461441
LD vs. LE	MSTRG.15546.1	-2.62535	0.173387
LD vs. LE	MSTRG.15715.1	-1.6036	0.100177
LD vs. LE	MSTRG.15798.5	-1.56038	0.363055
LD vs. LE	MSTRG.15858.1	-3.63705	0.0330866
LD vs. LE	MSTRG.15936.2	0.455991	0.549228
LD vs. LE	MSTRG.15949.1	1.93851	0.630432
LD vs. LE	MSTRG.16692.1	0.25127	0.851582
LD vs. LE	MSTRG.17053.1	-1.01754	0.473004
LD vs. LE	MSTRG.17059.3	1.65331	0.0352403
LD vs. LE	MSTRG.16286.1	-1.17777	0.302812
LD vs. LE	MSTRG.16674.1	3.10256	NA
LD vs. LE	MSTRG.16694.2	0.55423	0.465442
LD vs. LE	MSTRG.17002.1	-0.0262713	0.994863
LD vs. LE	MSTRG.17221.1	0.709127	0.587301
LD vs. LE	MSTRG.17353.1	2.17771	0.0888333
LD vs. LE	MSTRG.17414.1	0.363332	0.715765
LD vs. LE	MSTRG.17430.1	1.4846	0.621998
LD vs. LE	MSTRG.17804.1	2.8837	0.022214
LD vs. LE	MSTRG.18059.1	1.80593	0.654925
LD vs. LE	MSTRG.18208.1	-0.412233	0.667767
LD vs. LE	MSTRG.17129.7	-3.73841	0.012229
LD vs. LE	MSTRG.17217.8	0.098493	0.943671
LD vs. LE	MSTRG.17409.1	0.454516	0.791457
LD vs. LE	MSTRG.17475.1	-0.0795195	0.952178
LD vs. LE	MSTRG.18030.1	-0.19652	0.914745
LD vs. LE	MSTRG.18074.2	0.935501	0.818665
LD vs. LE	MSTRG.18250.1	0.0667987	0.981169
LD vs. LE	MSTRG.18325.2	0.701499	0.587049
LD vs. LE	MSTRG.18515.1	-3.92641	0.0694692
LD vs. LE	MSTRG.18602.1	0.156945	0.795797
LD vs. LE	MSTRG.18742.1	0.935501	0.818665
LD vs. LE	MSTRG.19011.1	3.42882	0.108913
LD vs. LE	MSTRG.19203.1	-0.988052	0.80867
LD vs. LE	MSTRG.18290.1	-0.620407	0.672726
LD vs. LE	MSTRG.18513.4	0.28988	0.630674
LD vs. LE	MSTRG.18591.2	-0.393271	0.542613
LD vs. LE	MSTRG.19085.1	0.152389	0.892188
LD vs. LE	MSTRG.19408.1	-0.988052	0.80867
LD vs. LE	MSTRG.19403.1	-1.62392	0.510601
LD vs. LE	MSTRG.19465.1	-0.391264	0.662136
LD vs. LE	MSTRG.19813.1	-2.62607	0.0358427
LD vs. LE	MSTRG.20176.1	-2.72232	0.418552
LD vs. LE	MSTRG.20276.1	-3.9457	0.0953378
LD vs. LE	MSTRG.21239.1	-0.402999	0.481884
LD vs. LE	MSTRG.21529.1	-0.557193	0.683773
LD vs. LE	MSTRG.21786.1	-1.73991	0.667428
LD vs. LE	MSTRG.21938.1	-0.437729	0.527242
LD vs. LE	MSTRG.22286.1	-0.774817	0.68355
LD vs. LE	MSTRG.22753.1	0.935501	0.818665
LD vs. LE	MSTRG.19447.2	-0.201001	0.776267
LD vs. LE	MSTRG.19466.4	0.382209	0.730488
LD vs. LE	MSTRG.20271.1	1.80593	0.654925
LD vs. LE	MSTRG.20376.1	0.837794	0.354842
LD vs. LE	MSTRG.20418.1	1.72073	0.0832863
LD vs. LE	MSTRG.20886.1	0.293925	0.824108
LD vs. LE	MSTRG.21160.1	-0.322057	0.696487
LD vs. LE	MSTRG.21737.1	-0.988052	0.80867
LD vs. LE	MSTRG.22124.2	-0.732182	0.206589
LD vs. LE	MSTRG.22311.1	0.153849	0.919023
LD vs. LE	MSTRG.22783.1	-0.0262713	0.994863
LD vs. LE	MSTRG.22906.1	1.70814	0.0505104
LD vs. LE	MSTRG.23464.1	-0.463607	0.797221
LD vs. LE	MSTRG.23511.2	-0.988052	0.80867
LD vs. LE	MSTRG.23719.1	-0.125865	0.927536
LD vs. LE	MSTRG.23866.1	0.170769	0.863775
LD vs. LE	MSTRG.24368.1	1.64932	0.143894
LD vs. LE	MSTRG.24394.2	-2.16302	0.0297576
LD vs. LE	MSTRG.24410.1	0.567889	0.401748
LD vs. LE	MSTRG.25178.1	2.49269	0.0666039
LD vs. LE	MSTRG.25224.2	-1.73991	0.667428
LD vs. LE	MSTRG.25280.1	0.935501	0.818665
LD vs. LE	MSTRG.25304.1	0.704086	0.61067
LD vs. LE	MSTRG.22827.1	0.541132	0.635622
LD vs. LE	MSTRG.22924.1	-1.40582	0.42569
LD vs. LE	MSTRG.23643.12	-0.0201089	0.977502
LD vs. LE	MSTRG.23705.1	0.078835	0.918658
LD vs. LE	MSTRG.23924.1	0.0392994	0.987012
LD vs. LE	MSTRG.23955.1	0.351871	0.610025
LD vs. LE	MSTRG.24128.1	2.13157	0.414263
LD vs. LE	MSTRG.24710.1	0.663849	0.37127
LD vs. LE	MSTRG.24927.3	0.491043	0.389163
LD vs. LE	MSTRG.25058.1	-2.20789	0.582201
LD vs. LE	MSTRG.25201.1	-1.99648	0.0962121
LD vs. LE	MSTRG.25205.1	0.935501	0.818665
LD vs. LE	MSTRG.26049.1	1.66202	0.495722
LD vs. LE	MSTRG.26084.1	0.821264	0.445526
LD vs. LE	MSTRG.26134.1	0.902279	0.525157
LD vs. LE	MSTRG.26428.1	0.501669	0.523839
LD vs. LE	MSTRG.27166.1	0.0363177	0.989808
LD vs. LE	MSTRG.27437.1	-0.40528	0.777609
LD vs. LE	MSTRG.27595.1	-0.425489	0.576021
LD vs. LE	MSTRG.27612.1	-0.988052	0.80867
LD vs. LE	MSTRG.27665.1	-1.0132	0.409978
LD vs. LE	MSTRG.25418.1	2.53647	0.470597
LD vs. LE	MSTRG.25553.1	-0.108791	0.900124
LD vs. LE	MSTRG.25814.1	-0.282221	0.677422
LD vs. LE	MSTRG.26092.1	0.949849	0.247145
LD vs. LE	MSTRG.26164.1	-2.48574	0.440373
LD vs. LE	MSTRG.26361.1	-3.66588	NA
LD vs. LE	MSTRG.27058.1	0.935501	0.818665
LD vs. LE	MSTRG.27389.1	-0.988052	0.80867
LD vs. LE	MSTRG.27572.1	-1.84216	0.440759
LD vs. LE	MSTRG.27626.1	-0.791392	0.761015
LD vs. LE	MSTRG.27741.1	0.560071	0.596916
LD vs. LE	MSTRG.27746.2	0.810719	0.393099
LD vs. LE	MSTRG.28010.1	-0.467185	0.791301
LD vs. LE	MSTRG.28207.1	1.96967	0.186644
LD vs. LE	MSTRG.28724.1	-0.404262	0.668681
LD vs. LE	MSTRG.28747.1	-0.988052	0.80867
LD vs. LE	MSTRG.28752.1	0.0357421	0.952981
LD vs. LE	MSTRG.28894.1	0.692376	0.384639
LD vs. LE	MSTRG.29361.1	-0.896406	0.355124
LD vs. LE	MSTRG.27816.1	0.651326	0.818025
LD vs. LE	MSTRG.28188.1	1.39045	0.137457
LD vs. LE	MSTRG.28223.2	-3.06317	0.0191028
LD vs. LE	MSTRG.28603.1	3.54872	0.00487441
LD vs. LE	MSTRG.28968.11	-1.41992	0.222754
LD vs. LE	MSTRG.29466.1	-0.486667	0.44839
LD vs. LE	MSTRG.29598.1	-0.556809	0.543655
LD vs. LE	MSTRG.29899.1	0.788481	0.478965
LD vs. LE	MSTRG.29939.1	-0.420271	0.650922
LD vs. LE	MSTRG.30034.1	1.61681	0.0805293
LD vs. LE	MSTRG.30119.7	-1.3518	0.66499
LD vs. LE	MSTRG.30339.1	1.52968	0.14306
LD vs. LE	MSTRG.30793.2	-1.98877	0.621683
LD vs. LE	MSTRG.30793.3	1.68733	0.0778709
LD vs. LE	MSTRG.31463.3	-0.0285977	0.960936
LD vs. LE	MSTRG.31551.1	0.935501	0.818665
LD vs. LE	MSTRG.31715.1	-0.762941	0.691251
LD vs. LE	MSTRG.31847.1	-0.238536	0.81108
LD vs. LE	MSTRG.32130.1	0.985577	0.380371
LD vs. LE	MSTRG.32263.1	0.158284	0.848657
LD vs. LE	MSTRG.32291.1	1.42573	0.180861
LD vs. LE	MSTRG.32315.1	0.664855	0.864133
LD vs. LE	MSTRG.32354.1	-0.28201	0.856191
LD vs. LE	MSTRG.32664.2	2.42389	0.455828
LD vs. LE	MSTRG.32887.2	-2.20789	0.582201
LD vs. LE	MSTRG.33170.1	-1.73991	0.667428
LD vs. LE	MSTRG.33214.1	2.83291	0.0261638
LD vs. LE	MSTRG.33418.1	1.29026	0.0892734
LD vs. LE	MSTRG.29981.1	-0.535203	0.651618
LD vs. LE	MSTRG.29995.1	2.24526	0.00326623
LD vs. LE	MSTRG.30169.2	0.0285558	0.982766
LD vs. LE	MSTRG.30350.1	3.97453	0.00322513
LD vs. LE	MSTRG.31014.1	-2.48574	0.440373
LD vs. LE	MSTRG.31844.1	1.11777	0.246653
LD vs. LE	MSTRG.32236.1	-0.988052	0.80867
LD vs. LE	MSTRG.32382.1	-0.988052	0.80867
LD vs. LE	MSTRG.32390.2	0.256338	0.639853
LD vs. LE	MSTRG.32811.1	0.621774	0.563701
LD vs. LE	MSTRG.33219.1	0.626433	0.757057
LD vs. LE	MSTRG.33622.4	1.32041	0.115505
LD vs. LE	MSTRG.33662.1	-0.112757	0.927319
LD vs. LE	MSTRG.33671.1	-0.382074	0.796987
LD vs. LE	MSTRG.33719.1	-0.152983	0.955834
LD vs. LE	MSTRG.33769.1	0.0677562	0.938634
LD vs. LE	MSTRG.33930.1	1.60169	0.208824
LD vs. LE	MSTRG.34215.1	-1.10904	0.320998
LD vs. LE	MSTRG.34232.1	1.62353	0.689127
LD vs. LE	MSTRG.34409.1	0.266865	0.921457
LD vs. LE	MSTRG.34547.1	0.935501	0.818665
LD vs. LE	MSTRG.36143.1	-3.5078	0.271033
LD vs. LE	MSTRG.33655.1	0.775705	0.747125
LD vs. LE	MSTRG.33779.1	0.28432	0.816807
LD vs. LE	MSTRG.33824.1	-0.988052	0.80867
LD vs. LE	MSTRG.34739.1	-1.591	0.238897
LD vs. LE	MSTRG.34944.1	0.344258	0.824073
LD vs. LE	MSTRG.35270.1	-0.988052	0.80867
LD vs. LE	MSTRG.35619.1	-1.94514	0.15103
LD vs. LE	MSTRG.35928.1	-2.04526	0.0141235
LD vs. LE	MSTRG.36128.1	-1.01609	0.753871
LD vs. LE	MSTRG.36236.1	-0.686124	0.543337
LD vs. LE	MSTRG.36310.1	2.14495	0.128962
LD vs. LE	MSTRG.36372.2	1.05096	0.552848
LD vs. LE	MSTRG.36579.1	-0.0262713	0.994863
LD vs. LE	MSTRG.36804.3	2.24247	0.199239
LD vs. LE	MSTRG.37413.1	1.62536	0.332369
LD vs. LE	MSTRG.37901.1	-1.73991	0.667428
LD vs. LE	MSTRG.37931.1	-0.0350647	0.9785
LD vs. LE	MSTRG.36272.2	0.154092	0.832834
LD vs. LE	MSTRG.36286.1	-0.644855	0.786619
LD vs. LE	MSTRG.36368.1	-0.988052	0.80867
LD vs. LE	MSTRG.36377.1	-0.475864	0.763934
LD vs. LE	MSTRG.36410.2	-1.24447	0.116193
LD vs. LE	MSTRG.36685.2	0.844856	0.802533
LD vs. LE	MSTRG.36709.1	-0.988052	0.80867
LD vs. LE	MSTRG.36813.1	-1.01573	0.7526
LD vs. LE	MSTRG.37238.3	0.338067	0.791003
LD vs. LE	MSTRG.37254.1	-3.28391	0.0668649
LD vs. LE	MSTRG.38068.2	-1.08002	0.534356
LD vs. LE	MSTRG.38073.1	0.844845	0.802974
LD vs. LE	MSTRG.38116.1	-0.0250955	0.981901
LD vs. LE	MSTRG.38814.1	1.26678	0.293124
LD vs. LE	MSTRG.38941.1	1.02402	0.667055
LD vs. LE	MSTRG.39059.9	-1.87905	0.252037
LD vs. LE	MSTRG.39106.1	-0.179951	0.762731
LD vs. LE	MSTRG.39111.1	1.58815	0.302657
LD vs. LE	MSTRG.39461.2	0.450729	0.747672
LD vs. LE	MSTRG.40140.3	-0.864943	0.384422
LD vs. LE	MSTRG.40388.3	0.418337	0.697514
LD vs. LE	MSTRG.40511.1	-2.34835	0.00141512
LD vs. LE	MSTRG.40566.1	1.9439	0.261412
LD vs. LE	MSTRG.40570.8	0.384547	0.528817
LD vs. LE	MSTRG.40575.1	-1.83601	0.295291
LD vs. LE	MSTRG.40589.1	0.0857964	0.955202
LD vs. LE	MSTRG.40640.1	-1.89478	0.463001
LD vs. LE	MSTRG.38488.1	0.620585	0.44025
LD vs. LE	MSTRG.38833.1	0.638025	0.360145
LD vs. LE	MSTRG.39058.1	-0.988052	0.80867
LD vs. LE	MSTRG.39166.1	-0.38135	0.882675
LD vs. LE	MSTRG.39527.1	-0.988052	0.80867
LD vs. LE	MSTRG.39568.2	-2.07961	0.0568349
LD vs. LE	MSTRG.39704.2	-0.822399	0.475622
LD vs. LE	MSTRG.39961.1	-0.71274	0.49804
LD vs. LE	MSTRG.40561.1	0.935501	0.818665
LD vs. LE	MSTRG.40667.2	-0.496197	0.5257
LD vs. LE	MSTRG.40763.1	-0.988052	0.80867
LD vs. LE	MSTRG.40799.1	3.60572	0.245354
LD vs. LE	MSTRG.40837.1	-0.988052	0.80867
LD vs. LE	MSTRG.40997.1	-0.285566	0.746172
LD vs. LE	MSTRG.41060.1	0.0846914	0.940592
LD vs. LE	MSTRG.41070.2	2.94051	0.353082
LD vs. LE	MSTRG.41212.1	1.24411	0.723382
LD vs. LE	MSTRG.41281.1	-0.395905	0.519257
LD vs. LE	MSTRG.41418.1	1.3322	0.504486
LD vs. LE	MSTRG.41438.1	0.664644	0.438591
LD vs. LE	MSTRG.41542.1	0.111025	0.86693
LD vs. LE	MSTRG.41792.1	-0.105861	0.964841
LD vs. LE	MSTRG.41859.5	1.97268	0.624174
LD vs. LE	MSTRG.41853.1	3.53825	0.20093
LD vs. LE	MSTRG.41993.1	0.935501	0.818665
LD vs. LE	MSTRG.42188.1	-1.06577	0.292371
LD vs. LE	MSTRG.42208.1	-1.10917	0.216923
LD vs. LE	MSTRG.42227.1	2.96027	0.202194
LD vs. LE	MSTRG.42391.2	-0.617017	0.266543
LD vs. LE	MSTRG.42714.1	0.935501	0.818665
LD vs. LE	MSTRG.42778.1	2.30155	0.0804011
LD vs. LE	MSTRG.43515.1	-2.30318	0.541392
LD vs. LE	MSTRG.43864.1	-1.75076	0.665429
LD vs. LE	MSTRG.42715.1	0.414176	0.766678
LD vs. LE	MSTRG.42804.1	2.90717	0.423053
LD vs. LE	MSTRG.43366.1	-0.969386	0.344703
LD vs. LE	MSTRG.43488.2	-0.217183	0.710827
LD vs. LE	MSTRG.43721.1	-0.0262713	0.994863
LD vs. LE	MSTRG.44118.2	0.029371	0.962242
LD vs. LE	MSTRG.44122.5	0.935501	0.818665
LD vs. LE	MSTRG.44122.6	-0.988052	0.80867
LD vs. LE	MSTRG.44147.1	1.22089	0.452307
LD vs. LE	MSTRG.44147.3	0.827745	0.521675
LD vs. MD	MSTRG.18.2	-0.777362	0.848911
LD vs. MD	MSTRG.650.1	-1.55728	0.485453
LD vs. MD	MSTRG.637.1	-0.777362	0.848911
LD vs. MD	MSTRG.794.1	-0.777362	0.848911
LD vs. MD	MSTRG.795.1	2.98171	0.453258
LD vs. MD	MSTRG.868.1	1.16482	0.618371
LD vs. MD	MSTRG.1266.1	-1.98229	0.257884
LD vs. MD	MSTRG.1581.1	-1.41999	0.0437034
LD vs. MD	MSTRG.1617.3	-0.122884	0.8345
LD vs. MD	MSTRG.1870.2	-2.66203	0.0596134
LD vs. MD	MSTRG.2181.1	1.2011	0.665866
LD vs. MD	MSTRG.2633.2	2.64087	0.00303245
LD vs. MD	MSTRG.2685.1	0.152807	0.843959
LD vs. MD	MSTRG.2692.1	1.07904	0.0963431
LD vs. MD	MSTRG.2916.1	-1.21535	0.436401
LD vs. MD	MSTRG.3359.2	-1.45355	0.0155618
LD vs. MD	MSTRG.3589.1	-0.777362	0.848911
LD vs. MD	MSTRG.117.1	5.30052	0.09673
LD vs. MD	MSTRG.242.1	-1.17803	0.363751
LD vs. MD	MSTRG.246.4	2.6572	0.497319
LD vs. MD	MSTRG.374.1	0.106133	0.857111
LD vs. MD	MSTRG.375.1	-4.46139	0.0281882
LD vs. MD	MSTRG.586.1	-0.777362	0.848911
LD vs. MD	MSTRG.590.1	-2.98007	0.335823
LD vs. MD	MSTRG.1435.1	2.09956	0.208375
LD vs. MD	MSTRG.1449.1	-2.7864	0.376537
LD vs. MD	MSTRG.1481.1	-1.88581	0.00635802
LD vs. MD	MSTRG.1587.1	1.57344	0.0151291
LD vs. MD	MSTRG.1699.1	0.0603675	0.912637
LD vs. MD	MSTRG.1804.1	4.67102	0.00269822
LD vs. MD	MSTRG.2174.1	-0.326969	0.803797
LD vs. MD	MSTRG.2359.1	-0.145804	0.948216
LD vs. MD	MSTRG.2649.1	0.883568	0.319296
LD vs. MD	MSTRG.3244.5	-2.92474	4.35e-05
LD vs. MD	MSTRG.3564.4	-0.446831	0.593599
LD vs. MD	MSTRG.3637.1	3.35912	0.312949
LD vs. MD	MSTRG.3731.1	-1.36093	0.0180082
LD vs. MD	MSTRG.4155.1	2.51603	0.103956
LD vs. MD	MSTRG.4222.1	-2.08732	0.602383
LD vs. MD	MSTRG.4263.1	0.931262	0.675508
LD vs. MD	MSTRG.4299.1	-0.992374	0.3076
LD vs. MD	MSTRG.4391.1	-0.204568	0.897155
LD vs. MD	MSTRG.4580.1	0.655831	0.594159
LD vs. MD	MSTRG.4896.1	-0.408596	0.423588
LD vs. MD	MSTRG.5009.11	-1.07662	0.361646
LD vs. MD	MSTRG.5233.1	-0.416917	0.802218
LD vs. MD	MSTRG.5287.1	1.14619	0.77879
LD vs. MD	MSTRG.4228.4	-0.346201	0.639556
LD vs. MD	MSTRG.4314.1	-0.541376	0.387875
LD vs. MD	MSTRG.4377.1	-1.97476	0.186407
LD vs. MD	MSTRG.4390.1	-1.21544	0.56346
LD vs. MD	MSTRG.4454.1	-1.54762	0.70235
LD vs. MD	MSTRG.4907.1	-2.1099	0.0286595
LD vs. MD	MSTRG.5085.1	-1.70981	0.489804
LD vs. MD	MSTRG.5194.1	1.98679	0.196351
LD vs. MD	MSTRG.5267.1	1.67285	0.0644693
LD vs. MD	MSTRG.5640.1	-1.39151	0.318117
LD vs. MD	MSTRG.5838.1	-4.02768	0.175748
LD vs. MD	MSTRG.5487.1	-0.330327	0.549014
LD vs. MD	MSTRG.5675.1	-1.34256	0.0973315
LD vs. MD	MSTRG.5677.1	-1.28474	0.199817
LD vs. MD	MSTRG.5779.1	1.33223	0.250443
LD vs. MD	MSTRG.6409.1	-0.529492	0.514936
LD vs. MD	MSTRG.6415.1	-2.52065	0.161329
LD vs. MD	MSTRG.6477.1	1.14619	0.77879
LD vs. MD	MSTRG.6478.1	-5.47641	0.0214364
LD vs. MD	MSTRG.6515.1	-1.3437	0.305791
LD vs. MD	MSTRG.6613.1	1.98576	0.623309
LD vs. MD	MSTRG.6976.1	7.04561	0.0716199
LD vs. MD	MSTRG.7017.1	0.0898129	0.932595
LD vs. MD	MSTRG.7268.1	-0.206046	0.750998
LD vs. MD	MSTRG.7414.1	-2.9878	0.158252
LD vs. MD	MSTRG.6482.1	-1.79724	0.655492
LD vs. MD	MSTRG.6703.1	-1.09536	0.656033
LD vs. MD	MSTRG.7231.1	-1.14358	0.344336
LD vs. MD	MSTRG.7435.1	1.14619	0.77879
LD vs. MD	MSTRG.7810.1	-0.241188	0.828949
LD vs. MD	MSTRG.8003.1	-0.128481	0.899798
LD vs. MD	MSTRG.8321.1	-1.07994	0.589455
LD vs. MD	MSTRG.8351.6	-0.0805592	0.870867
LD vs. MD	MSTRG.8418.1	1.3086	0.0837308
LD vs. MD	MSTRG.8949.1	-1.25795	0.0435605
LD vs. MD	MSTRG.9216.5	1.27268	0.0117798
LD vs. MD	MSTRG.9355.2	0.530385	0.763179
LD vs. MD	MSTRG.9428.1	-0.11739	0.94901
LD vs. MD	MSTRG.9477.1	1.3625	0.106764
LD vs. MD	MSTRG.9588.1	1.15047	0.775372
LD vs. MD	MSTRG.9743.1	-1.35438	0.18228
LD vs. MD	MSTRG.10034.1	1.71762	0.142432
LD vs. MD	MSTRG.10508.5	-5.15427	3.01e-07
LD vs. MD	MSTRG.10580.1	1.03255	0.485005
LD vs. MD	MSTRG.10806.2	1.1273	0.0750482
LD vs. MD	MSTRG.11114.1	-3.11972	0.36484
LD vs. MD	MSTRG.8058.1	1.73756	0.643307
LD vs. MD	MSTRG.8756.1	1.14619	0.77879
LD vs. MD	MSTRG.9369.1	-1.90471	0.369045
LD vs. MD	MSTRG.9392.2	-3.43528	0.179135
LD vs. MD	MSTRG.9475.1	4.20338	0.0687798
LD vs. MD	MSTRG.9497.1	3.82784	0.0021861
LD vs. MD	MSTRG.10028.1	1.66322	0.0715543
LD vs. MD	MSTRG.10107.1	0.821785	0.478902
LD vs. MD	MSTRG.10440.1	-2.12225	0.158595
LD vs. MD	MSTRG.10597.1	-0.903457	0.747013
LD vs. MD	MSTRG.11133.1	0.374483	0.608041
LD vs. MD	MSTRG.11228.3	1.14619	0.77879
LD vs. MD	MSTRG.11381.1	0.184418	0.963952
LD vs. MD	MSTRG.11781.1	0.788548	0.33313
LD vs. MD	MSTRG.12265.1	-1.53417	0.255169
LD vs. MD	MSTRG.12352.1	-0.041068	0.945117
LD vs. MD	MSTRG.12447.1	1.39421	0.351635
LD vs. MD	MSTRG.12511.1	-6.94809	9.11e-07
LD vs. MD	MSTRG.13196.1	-3.05492	0.267759
LD vs. MD	MSTRG.13554.2	1.14619	0.77879
LD vs. MD	MSTRG.13570.1	0.184418	0.963952
LD vs. MD	MSTRG.13579.1	0.487931	0.612051
LD vs. MD	MSTRG.13670.1	0.313842	0.777902
LD vs. MD	MSTRG.13803.1	-1.09001	0.594491
LD vs. MD	MSTRG.11808.2	-0.777362	0.848911
LD vs. MD	MSTRG.11883.2	0.568142	0.413635
LD vs. MD	MSTRG.12473.1	-0.735507	0.609812
LD vs. MD	MSTRG.13136.1	-1.5025	0.488923
LD vs. MD	MSTRG.13553.1	-1.83214	0.00088336
LD vs. MD	MSTRG.13847.1	-2.75078	0.488391
LD vs. MD	MSTRG.14146.2	0.959308	0.480706
LD vs. MD	MSTRG.14181.1	-0.777362	0.848911
LD vs. MD	MSTRG.14247.1	-3.96143	0.00123024
LD vs. MD	MSTRG.14299.1	-0.777362	0.848911
LD vs. MD	MSTRG.14398.1	-2.33307	0.194166
LD vs. MD	MSTRG.15480.1	0.492489	0.655456
LD vs. MD	MSTRG.15627.1	4.60778	0.000605844
LD vs. MD	MSTRG.13897.2	2.07107	0.607781
LD vs. MD	MSTRG.14120.1	0.0531582	0.962802
LD vs. MD	MSTRG.14276.1	-0.130881	0.832633
LD vs. MD	MSTRG.15165.2	-0.773163	0.70618
LD vs. MD	MSTRG.15233.1	-1.71311	0.212639
LD vs. MD	MSTRG.15546.1	0.866745	0.584475
LD vs. MD	MSTRG.15715.1	-2.10309	0.0403598
LD vs. MD	MSTRG.15798.5	0.0206449	0.986829
LD vs. MD	MSTRG.15858.1	0.686595	0.487337
LD vs. MD	MSTRG.15936.2	0.147914	0.853591
LD vs. MD	MSTRG.16692.1	0.05899	0.967226
LD vs. MD	MSTRG.17053.1	-2.22302	0.165705
LD vs. MD	MSTRG.17059.3	0.627758	0.442543
LD vs. MD	MSTRG.16286.1	-3.10476	0.0128333
LD vs. MD	MSTRG.16674.1	0.477001	0.603172
LD vs. MD	MSTRG.16694.2	1.68806	0.0428553
LD vs. MD	MSTRG.17002.1	2.08808	0.459745
LD vs. MD	MSTRG.17221.1	0.783816	0.563235
LD vs. MD	MSTRG.17353.1	1.59697	0.222794
LD vs. MD	MSTRG.17414.1	0.244269	0.830941
LD vs. MD	MSTRG.17430.1	1.08757	0.745506
LD vs. MD	MSTRG.17804.1	1.20261	0.342775
LD vs. MD	MSTRG.18043.1	2.07107	0.607781
LD vs. MD	MSTRG.18208.1	-2.35551	0.0184338
LD vs. MD	MSTRG.17129.7	2.97838	0.0125875
LD vs. MD	MSTRG.17217.8	0.650953	0.741551
LD vs. MD	MSTRG.17409.1	-2.75839	0.35222
LD vs. MD	MSTRG.17475.1	-1.67715	0.381274
LD vs. MD	MSTRG.17777.1	5.88511	0.0511813
LD vs. MD	MSTRG.17961.1	9.29647	1.87e-07
LD vs. MD	MSTRG.18030.1	-3.59151	0.362285
LD vs. MD	MSTRG.18250.1	-1.54762	0.70235
LD vs. MD	MSTRG.18325.2	1.23421	0.286902
LD vs. MD	MSTRG.18515.1	0.560259	0.716629
LD vs. MD	MSTRG.18602.1	0.0694225	0.892956
LD vs. MD	MSTRG.18742.1	2.98171	0.453258
LD vs. MD	MSTRG.19011.1	-0.777362	0.848911
LD vs. MD	MSTRG.19203.1	-0.777362	0.848911
LD vs. MD	MSTRG.18290.1	0.661149	0.581358
LD vs. MD	MSTRG.18513.4	-1.02148	0.066248
LD vs. MD	MSTRG.18591.2	-0.503201	0.446293
LD vs. MD	MSTRG.19085.1	1.55248	0.141309
LD vs. MD	MSTRG.19408.1	5.91628	0.000150698
LD vs. MD	MSTRG.19403.1	-0.694011	0.745377
LD vs. MD	MSTRG.19465.1	1.27125	0.0890054
LD vs. MD	MSTRG.19813.1	-1.76687	0.160739
LD vs. MD	MSTRG.20176.1	-1.57892	0.589673
LD vs. MD	MSTRG.20276.1	-3.81535	0.129725
LD vs. MD	MSTRG.21239.1	-0.272396	0.583947
LD vs. MD	MSTRG.21529.1	-2.22774	0.16238
LD vs. MD	MSTRG.21786.1	-1.62566	0.687648
LD vs. MD	MSTRG.21938.1	0.341209	0.553879
LD vs. MD	MSTRG.22286.1	-0.115579	0.95386
LD vs. MD	MSTRG.22753.1	1.98576	0.623309
LD vs. MD	MSTRG.19447.2	-0.0416431	0.943722
LD vs. MD	MSTRG.19466.4	2.75458	0.00141096
LD vs. MD	MSTRG.20271.1	1.98576	0.623309
LD vs. MD	MSTRG.20376.1	1.00905	0.258308
LD vs. MD	MSTRG.20418.1	1.59014	0.186628
LD vs. MD	MSTRG.20886.1	0.418253	0.747663
LD vs. MD	MSTRG.21160.1	-5.40238	6.72e-05
LD vs. MD	MSTRG.21559.1	1.14619	0.77879
LD vs. MD	MSTRG.21737.1	0.184418	0.963952
LD vs. MD	MSTRG.22124.2	0.0561175	0.911771
LD vs. MD	MSTRG.22311.1	-0.55625	0.751768
LD vs. MD	MSTRG.22783.1	0.184418	0.963952
LD vs. MD	MSTRG.22906.1	0.306921	0.674323
LD vs. MD	MSTRG.23464.1	-1.40902	0.575222
LD vs. MD	MSTRG.23511.2	-0.777362	0.848911
LD vs. MD	MSTRG.23719.1	-0.830915	0.575068
LD vs. MD	MSTRG.23866.1	0.805732	0.380253
LD vs. MD	MSTRG.24368.1	1.4055	0.248711
LD vs. MD	MSTRG.24394.2	-2.42251	0.0187923
LD vs. MD	MSTRG.24410.1	1.21138	0.0528009
LD vs. MD	MSTRG.24587.2	5.37087	0.0899526
LD vs. MD	MSTRG.25178.1	2.95383	0.0348816
LD vs. MD	MSTRG.25224.2	-1.62566	0.687648
LD vs. MD	MSTRG.25304.1	-0.221986	0.89359
LD vs. MD	MSTRG.22827.1	-1.80189	0.216551
LD vs. MD	MSTRG.22924.1	-1.8925	0.343875
LD vs. MD	MSTRG.23643.12	-0.720303	0.309489
LD vs. MD	MSTRG.23705.1	-1.07091	0.253466
LD vs. MD	MSTRG.23924.1	0.695858	0.7474
LD vs. MD	MSTRG.23955.1	0.421437	0.735758
LD vs. MD	MSTRG.24128.1	2.92731	0.186945
LD vs. MD	MSTRG.24710.1	0.60265	0.39311
LD vs. MD	MSTRG.24718.1	2.07107	0.607781
LD vs. MD	MSTRG.24927.3	1.52311	7.47e-05
LD vs. MD	MSTRG.25058.1	-1.95503	0.626393
LD vs. MD	MSTRG.25201.1	-3.97624	0.0155906
LD vs. MD	MSTRG.26049.1	1.66946	0.507699
LD vs. MD	MSTRG.26084.1	0.267736	0.848888
LD vs. MD	MSTRG.26134.1	0.571999	0.721649
LD vs. MD	MSTRG.26428.1	-1.44286	0.114243
LD vs. MD	MSTRG.27166.1	1.6495	0.479007
LD vs. MD	MSTRG.27437.1	0.0664267	0.959103
LD vs. MD	MSTRG.27482.1	2.07107	0.607781
LD vs. MD	MSTRG.27595.1	-0.211702	0.719633
LD vs. MD	MSTRG.27612.1	-0.777362	0.848911
LD vs. MD	MSTRG.27665.1	-3.35063	0.0250257
LD vs. MD	MSTRG.25553.1	-0.954643	0.404856
LD vs. MD	MSTRG.25814.1	-0.773169	0.21153
LD vs. MD	MSTRG.26092.1	0.0174458	0.98363
LD vs. MD	MSTRG.26164.1	0.235394	0.921505
LD vs. MD	MSTRG.26361.1	-5.36622	NA
LD vs. MD	MSTRG.26914.1	3.30276	0.404501
LD vs. MD	MSTRG.27389.1	-0.777362	0.848911
LD vs. MD	MSTRG.27492.1	3.03958	0.294453
LD vs. MD	MSTRG.27494.1	1.14619	0.77879
LD vs. MD	MSTRG.27572.1	-3.29471	0.31092
LD vs. MD	MSTRG.27626.1	2.40427	0.094833
LD vs. MD	MSTRG.27741.1	1.18109	0.310898
LD vs. MD	MSTRG.27746.2	2.54666	0.00022726
LD vs. MD	MSTRG.28010.1	-1.66897	0.448454
LD vs. MD	MSTRG.28207.1	-1.29514	0.505765
LD vs. MD	MSTRG.28724.1	-1.05577	0.290981
LD vs. MD	MSTRG.28747.1	-0.777362	0.848911
LD vs. MD	MSTRG.28752.1	0.80343	0.13749
LD vs. MD	MSTRG.28894.1	0.134349	0.857994
LD vs. MD	MSTRG.29361.1	-0.803529	0.432692
LD vs. MD	MSTRG.27816.1	-0.514928	0.898929
LD vs. MD	MSTRG.28188.1	1.24491	0.213302
LD vs. MD	MSTRG.28223.2	-1.00234	0.578354
LD vs. MD	MSTRG.28603.1	-2.52918	0.324422
LD vs. MD	MSTRG.28968.11	-1.27955	0.264153
LD vs. MD	MSTRG.29466.1	-0.573134	0.321736
LD vs. MD	MSTRG.29598.1	-0.938855	0.27399
LD vs. MD	MSTRG.29852.1	1.14619	0.77879
LD vs. MD	MSTRG.29899.1	-1.92461	0.207271
LD vs. MD	MSTRG.29939.1	-0.193528	0.831265
LD vs. MD	MSTRG.30034.1	2.25503	0.0262941
LD vs. MD	MSTRG.30119.7	0.693594	0.755734
LD vs. MD	MSTRG.30339.1	0.536411	0.586575
LD vs. MD	MSTRG.30793.2	-1.71879	0.670132
LD vs. MD	MSTRG.30793.3	2.35417	0.026828
LD vs. MD	MSTRG.31463.3	-0.53711	0.315299
LD vs. MD	MSTRG.31715.1	-2.52379	0.237076
LD vs. MD	MSTRG.31847.1	-0.674865	0.499926
LD vs. MD	MSTRG.32130.1	1.03398	0.279325
LD vs. MD	MSTRG.32263.1	-0.360619	0.641579
LD vs. MD	MSTRG.32291.1	0.452935	0.680418
LD vs. MD	MSTRG.32315.1	4.47374	0.020087
LD vs. MD	MSTRG.32354.1	1.23133	0.284218
LD vs. MD	MSTRG.32887.2	-1.95503	0.626393
LD vs. MD	MSTRG.33170.1	0.195523	0.950067
LD vs. MD	MSTRG.33214.1	4.14618	0.000957989
LD vs. MD	MSTRG.33418.1	1.94796	0.0204078
LD vs. MD	MSTRG.29981.1	0.4249	0.753327
LD vs. MD	MSTRG.29995.1	2.51774	0.000758124
LD vs. MD	MSTRG.30169.2	-1.73166	0.313505
LD vs. MD	MSTRG.30350.1	2.62852	0.0510053
LD vs. MD	MSTRG.31014.1	0.593679	0.741934
LD vs. MD	MSTRG.31844.1	2.80065	0.00490662
LD vs. MD	MSTRG.31992.1	1.14619	0.77879
LD vs. MD	MSTRG.32236.1	-0.777362	0.848911
LD vs. MD	MSTRG.32382.1	-0.777362	0.848911
LD vs. MD	MSTRG.32390.2	0.203576	0.660276
LD vs. MD	MSTRG.32811.1	-0.884076	0.397581
LD vs. MD	MSTRG.33219.1	2.33057	0.219887
LD vs. MD	MSTRG.33622.4	1.66066	0.0478729
LD vs. MD	MSTRG.33662.1	0.861234	0.543126
LD vs. MD	MSTRG.33671.1	0.986264	0.413732
LD vs. MD	MSTRG.33719.1	-0.82586	0.803402
LD vs. MD	MSTRG.33769.1	-0.0565295	0.956517
LD vs. MD	MSTRG.33930.1	1.43131	0.291957
LD vs. MD	MSTRG.34215.1	-1.02247	0.402503
LD vs. MD	MSTRG.34232.1	2.64275	0.500975
LD vs. MD	MSTRG.34409.1	-1.95503	0.626393
LD vs. MD	MSTRG.34547.1	1.14619	0.77879
LD vs. MD	MSTRG.36143.1	-2.46641	0.451264
LD vs. MD	MSTRG.33655.1	2.56801	0.243104
LD vs. MD	MSTRG.33779.1	1.93971	0.0850448
LD vs. MD	MSTRG.33824.1	-0.777362	0.848911
LD vs. MD	MSTRG.34739.1	-2.48242	0.0928981
LD vs. MD	MSTRG.34944.1	-0.763225	0.711521
LD vs. MD	MSTRG.35303.1	1.14619	0.77879
LD vs. MD	MSTRG.35270.1	-0.777362	0.848911
LD vs. MD	MSTRG.35619.1	-4.1369	0.0200662
LD vs. MD	MSTRG.35928.1	-2.5699	0.00218652
LD vs. MD	MSTRG.36128.1	0.720341	0.806437
LD vs. MD	MSTRG.36236.1	-2.46895	0.0539701
LD vs. MD	MSTRG.36310.1	-0.395834	0.800043
LD vs. MD	MSTRG.36372.2	-1.62182	0.581876
LD vs. MD	MSTRG.36579.1	2.47638	0.463223
LD vs. MD	MSTRG.36804.3	1.09669	0.67742
LD vs. MD	MSTRG.37413.1	1.26277	0.444944
LD vs. MD	MSTRG.37901.1	0.218263	0.954299
LD vs. MD	MSTRG.37931.1	0.107414	0.933367
LD vs. MD	MSTRG.36272.2	0.0693098	0.914815
LD vs. MD	MSTRG.36286.1	0.155947	0.940338
LD vs. MD	MSTRG.36368.1	5.65116	0.0295925
LD vs. MD	MSTRG.36377.1	-0.820885	0.678872
LD vs. MD	MSTRG.36410.2	-1.39726	0.114664
LD vs. MD	MSTRG.36543.1	1.14619	0.77879
LD vs. MD	MSTRG.36685.2	-0.777362	0.848911
LD vs. MD	MSTRG.36709.1	-0.777362	0.848911
LD vs. MD	MSTRG.36813.1	3.69872	0.0673652
LD vs. MD	MSTRG.37074.1	2.11224	0.600343
LD vs. MD	MSTRG.37238.3	-0.644366	0.732878
LD vs. MD	MSTRG.37254.1	-4.85205	0.0209742
LD vs. MD	MSTRG.38068.2	0.322848	0.811224
LD vs. MD	MSTRG.38073.1	2.43944	0.364614
LD vs. MD	MSTRG.38116.1	-1.91499	0.104998
LD vs. MD	MSTRG.38814.1	0.560131	0.666788
LD vs. MD	MSTRG.38941.1	0.0229322	0.994082
LD vs. MD	MSTRG.39059.9	-2.26252	0.25732
LD vs. MD	MSTRG.39106.1	-0.233481	0.669948
LD vs. MD	MSTRG.39111.1	2.53801	0.023515
LD vs. MD	MSTRG.39461.2	-1.73874	0.366204
LD vs. MD	MSTRG.39497.2	2.07107	0.607781
LD vs. MD	MSTRG.40140.3	2.33529	0.0648091
LD vs. MD	MSTRG.40388.3	3.93934	0.000985478
LD vs. MD	MSTRG.40448.1	2.62798	0.407905
LD vs. MD	MSTRG.40511.1	-3.54527	1.87e-05
LD vs. MD	MSTRG.40566.1	1.61864	0.312385
LD vs. MD	MSTRG.40570.8	0.952629	0.0786218
LD vs. MD	MSTRG.40575.1	-2.19649	0.229531
LD vs. MD	MSTRG.40589.1	-4.54959	0.103684
LD vs. MD	MSTRG.40640.1	0.500767	0.759288
LD vs. MD	MSTRG.38488.1	0.896366	0.192541
LD vs. MD	MSTRG.38833.1	1.15281	0.0341263
LD vs. MD	MSTRG.39058.1	-0.777362	0.848911
LD vs. MD	MSTRG.39166.1	0.986446	0.599318
LD vs. MD	MSTRG.39527.1	-0.777362	0.848911
LD vs. MD	MSTRG.39568.2	-1.41341	0.10889
LD vs. MD	MSTRG.39704.2	-2.87858	0.0720313
LD vs. MD	MSTRG.39961.1	-0.405986	0.699143
LD vs. MD	MSTRG.40667.2	-1.47281	0.0435425
LD vs. MD	MSTRG.40763.1	-0.777362	0.848911
LD vs. MD	MSTRG.40776.2	2.56809	0.520675
LD vs. MD	MSTRG.40799.1	23.1453	NA
LD vs. MD	MSTRG.40837.1	-0.777362	0.848911
LD vs. MD	MSTRG.40997.1	-1.53535	0.0799729
LD vs. MD	MSTRG.41060.1	0.251029	0.818769
LD vs. MD	MSTRG.41070.2	1.14619	0.77879
LD vs. MD	MSTRG.41212.1	-0.777362	0.848911
LD vs. MD	MSTRG.41281.1	-0.0273711	0.963472
LD vs. MD	MSTRG.41418.1	3.68449	0.00963458
LD vs. MD	MSTRG.41438.1	0.248993	0.744475
LD vs. MD	MSTRG.41542.1	-0.361364	0.557721
LD vs. MD	MSTRG.41792.1	0.103137	0.964983
LD vs. MD	MSTRG.41859.3	2.02901	0.615418
LD vs. MD	MSTRG.41859.5	6.88852	9.87e-05
LD vs. MD	MSTRG.41853.1	1.14619	0.77879
LD vs. MD	MSTRG.42188.1	0.221615	0.770705
LD vs. MD	MSTRG.42208.1	-2.66764	0.00588974
LD vs. MD	MSTRG.42227.1	5.08247	0.0052448
LD vs. MD	MSTRG.42391.2	-0.508991	0.279651
LD vs. MD	MSTRG.42778.1	2.44162	0.130749
LD vs. MD	MSTRG.43515.1	-2.14866	0.591383
LD vs. MD	MSTRG.43864.1	-0.592795	0.86062
LD vs. MD	MSTRG.42715.1	-0.170411	0.912962
LD vs. MD	MSTRG.42804.1	1.14619	0.77879
LD vs. MD	MSTRG.43366.1	-1.90297	0.090785
LD vs. MD	MSTRG.43488.2	0.0938371	0.849954
LD vs. MD	MSTRG.43721.1	-0.777362	0.848911
LD vs. MD	MSTRG.44118.2	-0.135201	0.802245
LD vs. MD	MSTRG.44122.6	-0.777362	0.848911
LD vs. MD	MSTRG.44147.1	3.33789	0.00264742
LD vs. MD	MSTRG.44147.3	1.65593	0.152944
MD vs. ME	MSTRG.18.2	1.0809	0.791089
MD vs. ME	MSTRG.650.1	2.36054	0.316369
MD vs. ME	MSTRG.795.1	-1.75344	0.627229
MD vs. ME	MSTRG.868.1	4.74031	0.00460311
MD vs. ME	MSTRG.1266.1	0.118871	0.963674
MD vs. ME	MSTRG.1581.1	0.824249	0.318616
MD vs. ME	MSTRG.1617.3	-0.00995028	0.98647
MD vs. ME	MSTRG.1870.2	-2.32829	0.559959
MD vs. ME	MSTRG.2181.1	-2.70542	0.468399
MD vs. ME	MSTRG.2633.2	-0.939174	0.265441
MD vs. ME	MSTRG.2685.1	-0.179705	0.817676
MD vs. ME	MSTRG.2692.1	0.396344	0.507757
MD vs. ME	MSTRG.2916.1	1.44596	0.331636
MD vs. ME	MSTRG.3359.2	0.695383	0.271281
MD vs. ME	MSTRG.3589.1	1.0809	0.791089
MD vs. ME	MSTRG.117.1	-3.2406	0.248527
MD vs. ME	MSTRG.242.1	0.150763	0.921154
MD vs. ME	MSTRG.246.4	-2.35582	0.555167
MD vs. ME	MSTRG.374.1	-0.00730207	0.988173
MD vs. ME	MSTRG.375.1	3.01577	0.393952
MD vs. ME	MSTRG.590.1	2.11128	0.546246
MD vs. ME	MSTRG.706.1	1.0809	0.791089
MD vs. ME	MSTRG.1435.1	-1.68735	0.383881
MD vs. ME	MSTRG.1449.1	6.12301	NA
MD vs. ME	MSTRG.1481.1	1.39503	0.115268
MD vs. ME	MSTRG.1587.1	-0.424167	0.447008
MD vs. ME	MSTRG.1699.1	-0.0587689	0.916103
MD vs. ME	MSTRG.1804.1	0.665145	0.621764
MD vs. ME	MSTRG.2174.1	-0.884825	0.503897
MD vs. ME	MSTRG.2359.1	0.573605	0.768953
MD vs. ME	MSTRG.2649.1	0.102203	0.884578
MD vs. ME	MSTRG.3244.5	1.00456	0.132243
MD vs. ME	MSTRG.3564.4	0.000988963	0.998795
MD vs. ME	MSTRG.3637.1	-3.07095	0.36818
MD vs. ME	MSTRG.3731.1	1.66687	0.0726901
MD vs. ME	MSTRG.4155.1	-1.99054	0.147939
MD vs. ME	MSTRG.4222.1	1.0809	0.791089
MD vs. ME	MSTRG.4263.1	0.388385	0.819969
MD vs. ME	MSTRG.4299.1	0.397404	0.692246
MD vs. ME	MSTRG.4391.1	1.10899	0.472713
MD vs. ME	MSTRG.4580.1	-1.31997	0.331997
MD vs. ME	MSTRG.4896.1	0.192294	0.761019
MD vs. ME	MSTRG.5009.11	-0.929278	0.588726
MD vs. ME	MSTRG.5233.1	0.818684	0.617218
MD vs. ME	MSTRG.5287.1	0.11913	0.976709
MD vs. ME	MSTRG.4228.4	0.108332	0.901434
MD vs. ME	MSTRG.4314.1	0.600929	0.366807
MD vs. ME	MSTRG.4377.1	0.96461	0.648881
MD vs. ME	MSTRG.4390.1	0.556809	0.7755
MD vs. ME	MSTRG.4907.1	0.650007	0.423765
MD vs. ME	MSTRG.5085.1	1.63741	0.585009
MD vs. ME	MSTRG.5194.1	-1.87969	0.247406
MD vs. ME	MSTRG.5267.1	-0.181283	0.801276
MD vs. ME	MSTRG.5640.1	-0.299304	0.900527
MD vs. ME	MSTRG.5487.1	0.24674	0.626301
MD vs. ME	MSTRG.5675.1	0.232305	0.792867
MD vs. ME	MSTRG.5677.1	0.790401	0.451777
MD vs. ME	MSTRG.5779.1	-0.340533	0.798701
MD vs. ME	MSTRG.6409.1	-0.0460928	0.96185
MD vs. ME	MSTRG.6415.1	2.47594	0.167345
MD vs. ME	MSTRG.6477.1	-0.842651	0.836394
MD vs. ME	MSTRG.6478.1	3.39848	0.390329
MD vs. ME	MSTRG.6515.1	1.48307	0.280822
MD vs. ME	MSTRG.6613.1	-0.75463	0.851818
MD vs. ME	MSTRG.6976.1	-1.95123	0.338904
MD vs. ME	MSTRG.7017.1	1.30116	0.141007
MD vs. ME	MSTRG.7268.1	0.539862	0.460417
MD vs. ME	MSTRG.7414.1	1.10714	0.7826
MD vs. ME	MSTRG.6703.1	0.192435	0.944601
MD vs. ME	MSTRG.7231.1	0.209246	0.918649
MD vs. ME	MSTRG.7435.1	0.11913	0.976709
MD vs. ME	MSTRG.7810.1	0.265046	0.811876
MD vs. ME	MSTRG.8003.1	-1.58097	0.288698
MD vs. ME	MSTRG.8321.1	1.44743	0.460575
MD vs. ME	MSTRG.8351.6	0.593969	0.230062
MD vs. ME	MSTRG.8418.1	-0.0859124	0.884074
MD vs. ME	MSTRG.8949.1	0.677461	0.211831
MD vs. ME	MSTRG.9216.5	-0.140612	0.773551
MD vs. ME	MSTRG.9355.2	-0.373986	0.835199
MD vs. ME	MSTRG.9428.1	0.130865	0.945201
MD vs. ME	MSTRG.9477.1	0.0810686	0.932699
MD vs. ME	MSTRG.9588.1	-1.79544	0.656169
MD vs. ME	MSTRG.9743.1	-0.0565636	0.965741
MD vs. ME	MSTRG.10034.1	-0.342133	0.697068
MD vs. ME	MSTRG.10508.5	5.61618	NA
MD vs. ME	MSTRG.10580.1	-4.11041	0.0119734
MD vs. ME	MSTRG.10806.2	0.013477	0.982032
MD vs. ME	MSTRG.11114.1	2.50526	0.529407
MD vs. ME	MSTRG.8058.1	-2.38293	0.550467
MD vs. ME	MSTRG.8756.1	-0.842651	0.836394
MD vs. ME	MSTRG.9369.1	0.660605	0.822163
MD vs. ME	MSTRG.9392.2	2.06903	0.607657
MD vs. ME	MSTRG.9475.1	2.43677	0.0706878
MD vs. ME	MSTRG.9497.1	-1.38761	0.0574083
MD vs. ME	MSTRG.10028.1	-1.00764	0.128927
MD vs. ME	MSTRG.10107.1	-0.404687	0.723673
MD vs. ME	MSTRG.10440.1	1.86939	0.236581
MD vs. ME	MSTRG.10597.1	-1.71641	0.670927
MD vs. ME	MSTRG.11133.1	0.636016	0.436953
MD vs. ME	MSTRG.11228.3	-0.842651	0.836394
MD vs. ME	MSTRG.11381.1	-0.842651	0.836394
MD vs. ME	MSTRG.11781.1	-0.359137	0.709243
MD vs. ME	MSTRG.12265.1	-0.702871	0.698873
MD vs. ME	MSTRG.12352.1	0.0741539	0.877304
MD vs. ME	MSTRG.12447.1	-2.05646	0.255624
MD vs. ME	MSTRG.12511.1	5.06278	0.00277736
MD vs. ME	MSTRG.13196.1	1.0809	0.791089
MD vs. ME	MSTRG.13554.2	-0.842651	0.836394
MD vs. ME	MSTRG.13570.1	1.02586	0.753997
MD vs. ME	MSTRG.13579.1	0.455437	0.657027
MD vs. ME	MSTRG.13670.1	-0.496811	0.690332
MD vs. ME	MSTRG.13803.1	-0.750853	0.818953
MD vs. ME	MSTRG.11883.2	-0.0363599	0.959811
MD vs. ME	MSTRG.12473.1	-3.22968	0.124547
MD vs. ME	MSTRG.13136.1	0.24316	0.94825
MD vs. ME	MSTRG.13553.1	1.13423	0.116117
MD vs. ME	MSTRG.14146.2	1.73042	0.117728
MD vs. ME	MSTRG.14247.1	-0.166526	0.933457
MD vs. ME	MSTRG.14398.1	2.4093	0.177668
MD vs. ME	MSTRG.15480.1	0.520855	0.583005
MD vs. ME	MSTRG.15627.1	-1.74206	0.100808
MD vs. ME	MSTRG.13897.2	-0.787604	0.81114
MD vs. ME	MSTRG.14120.1	-0.0558941	0.962867
MD vs. ME	MSTRG.14276.1	0.90746	0.117485
MD vs. ME	MSTRG.15165.2	3.25737	0.0634482
MD vs. ME	MSTRG.15233.1	0.922795	0.535454
MD vs. ME	MSTRG.15546.1	-3.99911	0.0867075
MD vs. ME	MSTRG.15715.1	0.781793	0.517509
MD vs. ME	MSTRG.15798.5	0.713841	0.551701
MD vs. ME	MSTRG.15858.1	-1.1003	0.222901
MD vs. ME	MSTRG.15936.2	-0.173641	0.784875
MD vs. ME	MSTRG.15949.1	1.0809	0.791089
MD vs. ME	MSTRG.16692.1	0.7377	0.57912
MD vs. ME	MSTRG.17053.1	1.20473	0.579487
MD vs. ME	MSTRG.17059.3	-0.25134	0.763452
MD vs. ME	MSTRG.16286.1	2.06858	0.182513
MD vs. ME	MSTRG.16674.1	1.96892	0.122549
MD vs. ME	MSTRG.16694.2	-0.465479	0.571937
MD vs. ME	MSTRG.17002.1	-1.79425	0.528248
MD vs. ME	MSTRG.17221.1	0.833565	0.448267
MD vs. ME	MSTRG.17353.1	1.14923	0.35733
MD vs. ME	MSTRG.17414.1	0.171198	0.862141
MD vs. ME	MSTRG.17430.1	-0.79315	0.810448
MD vs. ME	MSTRG.17463.1	1.0809	0.791089
MD vs. ME	MSTRG.17804.1	1.66131	0.237541
MD vs. ME	MSTRG.18043.1	-0.787604	0.81114
MD vs. ME	MSTRG.18059.1	1.0809	0.791089
MD vs. ME	MSTRG.18208.1	2.40277	0.125961
MD vs. ME	MSTRG.17129.7	-5.07444	7.48e-05
MD vs. ME	MSTRG.17217.8	1.5824	0.462978
MD vs. ME	MSTRG.17475.1	0.777929	0.715672
MD vs. ME	MSTRG.17777.1	-5.62027	0.0716795
MD vs. ME	MSTRG.17961.1	-0.889316	0.447851
MD vs. ME	MSTRG.18250.1	1.0809	0.791089
MD vs. ME	MSTRG.18325.2	-0.211266	0.796971
MD vs. ME	MSTRG.18515.1	-1.66069	0.240691
MD vs. ME	MSTRG.18602.1	0.450642	0.385997
MD vs. ME	MSTRG.18750.1	1.0809	0.791089
MD vs. ME	MSTRG.18742.1	-2.7148	0.494508
MD vs. ME	MSTRG.18290.1	-2.00565	0.166647
MD vs. ME	MSTRG.18513.4	0.381874	0.58465
MD vs. ME	MSTRG.18591.2	0.523911	0.36922
MD vs. ME	MSTRG.19085.1	-1.20195	0.256177
MD vs. ME	MSTRG.19408.1	0.634596	0.579035
MD vs. ME	MSTRG.19403.1	-2.2961	0.565589
MD vs. ME	MSTRG.19465.1	-1.47854	0.0375491
MD vs. ME	MSTRG.19813.1	1.93087	0.244241
MD vs. ME	MSTRG.20176.1	0.11913	0.976709
MD vs. ME	MSTRG.20276.1	1.0809	0.791089
MD vs. ME	MSTRG.21239.1	-0.151332	0.821712
MD vs. ME	MSTRG.21529.1	1.03244	0.503715
MD vs. ME	MSTRG.21786.1	6.56842	0.00929105
MD vs. ME	MSTRG.21938.1	-0.13161	0.815612
MD vs. ME	MSTRG.22286.1	0.673507	0.726971
MD vs. ME	MSTRG.22753.1	0.121755	0.974308
MD vs. ME	MSTRG.19447.2	0.438483	0.4573
MD vs. ME	MSTRG.19466.4	-0.801451	0.29115
MD vs. ME	MSTRG.20271.1	1.11984	0.742966
MD vs. ME	MSTRG.20376.1	-0.893027	0.250599
MD vs. ME	MSTRG.20418.1	-0.55967	0.674116
MD vs. ME	MSTRG.20886.1	0.302872	0.775983
MD vs. ME	MSTRG.21160.1	1.91081	0.436542
MD vs. ME	MSTRG.21559.1	-0.842651	0.836394
MD vs. ME	MSTRG.21737.1	-0.842651	0.836394
MD vs. ME	MSTRG.22124.2	0.361012	0.568425
MD vs. ME	MSTRG.22311.1	1.13011	0.488027
MD vs. ME	MSTRG.22783.1	-0.842651	0.836394
MD vs. ME	MSTRG.22906.1	0.236621	0.841207
MD vs. ME	MSTRG.23464.1	0.438727	0.87122
MD vs. ME	MSTRG.23511.2	1.0809	0.791089
MD vs. ME	MSTRG.23719.1	1.64017	0.212853
MD vs. ME	MSTRG.23866.1	-0.563279	0.518915
MD vs. ME	MSTRG.24368.1	-0.417939	0.72233
MD vs. ME	MSTRG.24394.2	0.101825	0.942225
MD vs. ME	MSTRG.24410.1	-0.275358	0.550888
MD vs. ME	MSTRG.24587.2	-5.10581	0.118886
MD vs. ME	MSTRG.25178.1	-0.657016	0.542507
MD vs. ME	MSTRG.25304.1	1.76212	0.216922
MD vs. ME	MSTRG.22827.1	1.68215	0.425862
MD vs. ME	MSTRG.22924.1	0.0983477	0.974561
MD vs. ME	MSTRG.23529.1	1.0809	0.791089
MD vs. ME	MSTRG.23643.12	0.28936	0.704119
MD vs. ME	MSTRG.23705.1	0.00966669	0.99285
MD vs. ME	MSTRG.23924.1	-0.546043	0.799578
MD vs. ME	MSTRG.23955.1	-0.372825	0.797737
MD vs. ME	MSTRG.24128.1	-0.74497	0.682254
MD vs. ME	MSTRG.24710.1	0.106628	0.865183
MD vs. ME	MSTRG.24718.1	-0.787627	0.811857
MD vs. ME	MSTRG.24927.3	-0.522238	0.196722
MD vs. ME	MSTRG.25201.1	4.0133	0.0109247
MD vs. ME	MSTRG.26049.1	1.18755	0.61843
MD vs. ME	MSTRG.26084.1	-1.49715	0.162263
MD vs. ME	MSTRG.26134.1	0.29327	0.85874
MD vs. ME	MSTRG.26428.1	0.851821	0.372749
MD vs. ME	MSTRG.27166.1	-1.16601	0.664581
MD vs. ME	MSTRG.27437.1	0.60369	0.603057
MD vs. ME	MSTRG.27482.1	-1.75038	0.664571
MD vs. ME	MSTRG.27595.1	0.25444	0.676158
MD vs. ME	MSTRG.27665.1	-1.36215	0.598638
MD vs. ME	MSTRG.25418.1	2.61968	0.500751
MD vs. ME	MSTRG.25553.1	-3.94789	0.0401267
MD vs. ME	MSTRG.25814.1	1.05257	0.119874
MD vs. ME	MSTRG.26082.1	1.0809	0.791089
MD vs. ME	MSTRG.26092.1	0.702551	0.362857
MD vs. ME	MSTRG.26164.1	-1.4203	0.704041
MD vs. ME	MSTRG.26361.1	2.57456	0.0157769
MD vs. ME	MSTRG.26914.1	0.828483	0.728472
MD vs. ME	MSTRG.27058.1	1.95732	0.628011
MD vs. ME	MSTRG.27492.1	0.108953	0.960833
MD vs. ME	MSTRG.27494.1	-0.842651	0.836394
MD vs. ME	MSTRG.27626.1	-0.880116	0.479596
MD vs. ME	MSTRG.27741.1	-0.312728	0.706067
MD vs. ME	MSTRG.27746.2	-2.87398	3.15e-05
MD vs. ME	MSTRG.28010.1	0.724149	0.767285
MD vs. ME	MSTRG.28207.1	-0.353975	0.920754
MD vs. ME	MSTRG.28724.1	0.19504	0.866567
MD vs. ME	MSTRG.28752.1	0.236043	0.663305
MD vs. ME	MSTRG.28894.1	0.43638	0.641001
MD vs. ME	MSTRG.29361.1	1.00929	0.402953
MD vs. ME	MSTRG.27816.1	2.43429	0.468446
MD vs. ME	MSTRG.28188.1	-0.5716	0.437311
MD vs. ME	MSTRG.28223.2	-4.52773	0.0116368
MD vs. ME	MSTRG.28603.1	2.02394	0.477086
MD vs. ME	MSTRG.28968.11	1.12118	0.314379
MD vs. ME	MSTRG.29466.1	0.281082	0.699282
MD vs. ME	MSTRG.29598.1	1.21888	0.162357
MD vs. ME	MSTRG.29852.1	-0.842651	0.836394
MD vs. ME	MSTRG.29899.1	0.198855	0.932994
MD vs. ME	MSTRG.29939.1	-0.128978	0.892112
MD vs. ME	MSTRG.30034.1	-0.8547	0.24383
MD vs. ME	MSTRG.30119.7	-1.79425	0.528248
MD vs. ME	MSTRG.30339.1	0.140406	0.855627
MD vs. ME	MSTRG.30793.2	1.0809	0.791089
MD vs. ME	MSTRG.30793.3	0.283826	0.706043
MD vs. ME	MSTRG.31463.3	0.506216	0.377441
MD vs. ME	MSTRG.31551.1	1.0809	0.791089
MD vs. ME	MSTRG.31715.1	2.0116	0.403736
MD vs. ME	MSTRG.31847.1	1.1909	0.269165
MD vs. ME	MSTRG.32130.1	0.0189477	0.98332
MD vs. ME	MSTRG.32263.1	-0.474993	0.62398
MD vs. ME	MSTRG.32291.1	-0.452151	0.684479
MD vs. ME	MSTRG.32315.1	-0.239815	0.875684
MD vs. ME	MSTRG.32354.1	-1.15301	0.294761
MD vs. ME	MSTRG.32887.2	1.0809	0.791089
MD vs. ME	MSTRG.33170.1	-0.750853	0.818953
MD vs. ME	MSTRG.33214.1	-0.407786	0.679997
MD vs. ME	MSTRG.33418.1	-0.754525	0.399154
MD vs. ME	MSTRG.29981.1	-0.417014	0.666367
MD vs. ME	MSTRG.29995.1	0.156356	0.874503
MD vs. ME	MSTRG.30169.2	1.53493	0.356187
MD vs. ME	MSTRG.30350.1	-0.596522	0.577954
MD vs. ME	MSTRG.31014.1	-0.329646	0.866325
MD vs. ME	MSTRG.31844.1	0.0269657	NA
MD vs. ME	MSTRG.31992.1	-0.842651	0.836394
MD vs. ME	MSTRG.32390.2	0.170793	0.75801
MD vs. ME	MSTRG.32811.1	1.88181	0.171622
MD vs. ME	MSTRG.33219.1	-0.0336861	0.981162
MD vs. ME	MSTRG.33622.4	-0.45724	0.481403
MD vs. ME	MSTRG.33662.1	-1.1298	0.428013
MD vs. ME	MSTRG.33671.1	0.79962	0.407465
MD vs. ME	MSTRG.33719.1	1.60115	0.532398
MD vs. ME	MSTRG.33769.1	-1.10107	0.313866
MD vs. ME	MSTRG.33930.1	-1.0914	0.372841
MD vs. ME	MSTRG.34215.1	0.00239795	0.998462
MD vs. ME	MSTRG.34232.1	-1.35839	0.653403
MD vs. ME	MSTRG.34547.1	0.11913	0.976709
MD vs. ME	MSTRG.36143.1	0.11913	0.976709
MD vs. ME	MSTRG.33655.1	-1.35184	0.546969
MD vs. ME	MSTRG.33779.1	-1.31419	0.0885539
MD vs. ME	MSTRG.34739.1	-1.79986	0.248123
MD vs. ME	MSTRG.34944.1	1.47933	0.443629
MD vs. ME	MSTRG.35303.1	-0.842651	0.836394
MD vs. ME	MSTRG.35619.1	2.07893	0.464444
MD vs. ME	MSTRG.35928.1	1.08021	0.398665
MD vs. ME	MSTRG.36128.1	-0.499981	0.88947
MD vs. ME	MSTRG.36236.1	1.83154	0.188339
MD vs. ME	MSTRG.36310.1	-1.79017	0.459682
MD vs. ME	MSTRG.36372.2	1.63734	0.583592
MD vs. ME	MSTRG.36579.1	0.567018	0.772395
MD vs. ME	MSTRG.36804.3	0.77374	0.644629
MD vs. ME	MSTRG.37413.1	-0.0329739	0.983273
MD vs. ME	MSTRG.37901.1	0.133705	0.971815
MD vs. ME	MSTRG.37931.1	-0.79707	0.625752
MD vs. ME	MSTRG.36272.2	-0.271559	0.635561
MD vs. ME	MSTRG.36286.1	1.13412	0.529814
MD vs. ME	MSTRG.36368.1	-6.29479	0.0352913
MD vs. ME	MSTRG.36377.1	1.85989	0.287553
MD vs. ME	MSTRG.36410.2	0.880162	0.265125
MD vs. ME	MSTRG.36469.2	2.06903	0.607657
MD vs. ME	MSTRG.36543.1	-0.842651	0.836394
MD vs. ME	MSTRG.36813.1	-4.34471	0.0592835
MD vs. ME	MSTRG.37074.1	-1.79544	0.656169
MD vs. ME	MSTRG.37238.3	0.265436	0.869136
MD vs. ME	MSTRG.37254.1	1.0809	0.791089
MD vs. ME	MSTRG.38068.2	-1.1416	0.484994
MD vs. ME	MSTRG.38073.1	2.90533	0.0748734
MD vs. ME	MSTRG.38116.1	0.407398	0.716813
MD vs. ME	MSTRG.38814.1	0.499953	0.612296
MD vs. ME	MSTRG.38941.1	0.0983477	0.974561
MD vs. ME	MSTRG.39059.9	1.12195	0.682685
MD vs. ME	MSTRG.39106.1	0.385509	0.468045
MD vs. ME	MSTRG.39111.1	-0.460077	0.61103
MD vs. ME	MSTRG.39461.2	1.90626	0.346375
MD vs. ME	MSTRG.39497.2	-1.75038	0.664571
MD vs. ME	MSTRG.40140.3	-2.38125	0.0475859
MD vs. ME	MSTRG.40388.3	-3.11131	0.00869987
MD vs. ME	MSTRG.40448.1	-1.36214	0.59671
MD vs. ME	MSTRG.40511.1	1.65548	0.018221
MD vs. ME	MSTRG.40566.1	0.416268	0.741294
MD vs. ME	MSTRG.40570.8	-0.0398545	0.933271
MD vs. ME	MSTRG.40575.1	1.47171	0.453458
MD vs. ME	MSTRG.40589.1	4.56132	0.0968597
MD vs. ME	MSTRG.40640.1	-1.22166	0.536619
MD vs. ME	MSTRG.38488.1	-0.75622	0.251955
MD vs. ME	MSTRG.38781.1	1.0809	0.791089
MD vs. ME	MSTRG.38833.1	-0.258254	0.621374
MD vs. ME	MSTRG.39058.1	1.0809	0.791089
MD vs. ME	MSTRG.39166.1	-0.635042	0.733266
MD vs. ME	MSTRG.39568.2	-0.0178443	0.985748
MD vs. ME	MSTRG.39704.2	1.46525	0.492288
MD vs. ME	MSTRG.39961.1	0.106177	0.947911
MD vs. ME	MSTRG.40667.2	0.399156	0.653289
MD vs. ME	MSTRG.40776.2	-2.30033	0.564847
MD vs. ME	MSTRG.40799.1	-4.90077	NA
MD vs. ME	MSTRG.40837.1	1.95732	0.628011
MD vs. ME	MSTRG.40997.1	0.469532	0.673366
MD vs. ME	MSTRG.41060.1	0.580128	0.583408
MD vs. ME	MSTRG.41070.2	-0.842651	0.836394
MD vs. ME	MSTRG.41281.1	0.243102	0.606976
MD vs. ME	MSTRG.41418.1	-1.02981	0.249787
MD vs. ME	MSTRG.41438.1	-0.219388	0.787147
MD vs. ME	MSTRG.41542.1	0.9576	0.16535
MD vs. ME	MSTRG.41792.1	0.192442	0.933961
MD vs. ME	MSTRG.41859.3	-1.70425	0.673208
MD vs. ME	MSTRG.41859.5	-2.61401	0.052245
MD vs. ME	MSTRG.41853.1	2.78738	0.273063
MD vs. ME	MSTRG.41993.1	2.06903	0.607657
MD vs. ME	MSTRG.42188.1	-0.509952	0.552574
MD vs. ME	MSTRG.42208.1	1.04363	0.294503
MD vs. ME	MSTRG.42227.1	-1.91841	0.285989
MD vs. ME	MSTRG.42391.2	0.0637426	0.892775
MD vs. ME	MSTRG.42778.1	-1.26885	0.363252
MD vs. ME	MSTRG.43864.1	1.02581	0.75252
MD vs. ME	MSTRG.42715.1	-0.25591	0.88062
MD vs. ME	MSTRG.42804.1	3.40896	0.157421
MD vs. ME	MSTRG.43366.1	0.48965	0.673489
MD vs. ME	MSTRG.43488.2	0.163867	0.758264
MD vs. ME	MSTRG.44118.2	0.180563	0.78087
MD vs. ME	MSTRG.44147.1	-0.625446	0.45149
MD vs. ME	MSTRG.44147.3	0.173488	0.838575
LE vs. ME	MSTRG.18.2	0.210318	0.958893
LE vs. ME	MSTRG.650.1	0.173161	0.906994
LE vs. ME	MSTRG.794.1	-0.751463	0.853887
LE vs. ME	MSTRG.795.1	0.210318	0.958893
LE vs. ME	MSTRG.868.1	5.17809	0.000947899
LE vs. ME	MSTRG.1266.1	-0.41393	0.866647
LE vs. ME	MSTRG.1581.1	-0.571963	0.419617
LE vs. ME	MSTRG.1617.3	0.230897	0.730714
LE vs. ME	MSTRG.1870.2	-4.30333	0.0356678
LE vs. ME	MSTRG.2181.1	-0.751463	0.853887
LE vs. ME	MSTRG.2633.2	-0.0981013	0.923516
LE vs. ME	MSTRG.2685.1	-0.947196	0.189935
LE vs. ME	MSTRG.2692.1	1.08292	0.104183
LE vs. ME	MSTRG.2916.1	-1.86321	0.131965
LE vs. ME	MSTRG.3359.2	0.325026	0.642074
LE vs. ME	MSTRG.3589.1	0.210318	0.958893
LE vs. ME	MSTRG.117.1	2.03371	0.614764
LE vs. ME	MSTRG.242.1	0.543369	0.726933
LE vs. ME	MSTRG.246.4	-0.751463	0.853887
LE vs. ME	MSTRG.374.1	1.31519	0.112254
LE vs. ME	MSTRG.375.1	-0.394857	0.842476
LE vs. ME	MSTRG.590.1	3.08325	0.437617
LE vs. ME	MSTRG.706.1	-1.15725	0.703815
LE vs. ME	MSTRG.1435.1	1.55691	0.557335
LE vs. ME	MSTRG.1449.1	6.25662	NA
LE vs. ME	MSTRG.1481.1	0.454864	0.580175
LE vs. ME	MSTRG.1587.1	0.332922	0.57111
LE vs. ME	MSTRG.1699.1	0.629525	0.279707
LE vs. ME	MSTRG.1804.1	3.88342	0.0191348
LE vs. ME	MSTRG.2174.1	-2.02684	0.0752141
LE vs. ME	MSTRG.2359.1	1.09807	0.632686
LE vs. ME	MSTRG.2649.1	-1.1942	0.110162
LE vs. ME	MSTRG.3244.5	0.0891148	0.906474
LE vs. ME	MSTRG.3564.4	0.786467	0.304816
LE vs. ME	MSTRG.3637.1	-4.61377	0.0219358
LE vs. ME	MSTRG.3731.1	0.209939	0.822818
LE vs. ME	MSTRG.4155.1	-1.02367	0.535857
LE vs. ME	MSTRG.4222.1	1.17209	0.773926
LE vs. ME	MSTRG.4263.1	2.69138	0.208093
LE vs. ME	MSTRG.4299.1	0.404926	0.711665
LE vs. ME	MSTRG.4391.1	0.466149	0.715992
LE vs. ME	MSTRG.4580.1	-1.83495	0.126789
LE vs. ME	MSTRG.4896.1	-0.288995	0.633685
LE vs. ME	MSTRG.5009.11	-0.969461	0.518295
LE vs. ME	MSTRG.5233.1	-2.13509	0.101074
LE vs. ME	MSTRG.5287.1	1.17209	0.773926
LE vs. ME	MSTRG.4228.4	-0.646011	0.429947
LE vs. ME	MSTRG.4314.1	-0.101658	0.865464
LE vs. ME	MSTRG.4377.1	0.433289	0.796533
LE vs. ME	MSTRG.4390.1	1.13892	0.584129
LE vs. ME	MSTRG.4454.1	-0.751463	0.853887
LE vs. ME	MSTRG.4907.1	0.477483	0.582986
LE vs. ME	MSTRG.5085.1	0.815152	0.739953
LE vs. ME	MSTRG.5194.1	-3.87886	0.00213471
LE vs. ME	MSTRG.5267.1	1.3203	0.147969
LE vs. ME	MSTRG.5640.1	-2.0552	0.172477
LE vs. ME	MSTRG.5838.1	-4.10254	0.213967
LE vs. ME	MSTRG.5487.1	0.370026	0.471323
LE vs. ME	MSTRG.5675.1	-0.97885	0.124614
LE vs. ME	MSTRG.5677.1	-0.452139	0.558644
LE vs. ME	MSTRG.5779.1	0.357198	0.79229
LE vs. ME	MSTRG.6409.1	0.00235409	0.997603
LE vs. ME	MSTRG.6415.1	-0.336035	0.803678
LE vs. ME	MSTRG.6477.1	-3.05356	0.349488
LE vs. ME	MSTRG.6478.1	0.682479	0.78234
LE vs. ME	MSTRG.6515.1	0.261101	0.827362
LE vs. ME	MSTRG.6613.1	0.210318	0.958893
LE vs. ME	MSTRG.6976.1	4.12061	0.0628137
LE vs. ME	MSTRG.7017.1	-0.207123	0.807096
LE vs. ME	MSTRG.7268.1	0.0979081	0.887115
LE vs. ME	MSTRG.7414.1	-1.49049	0.545477
LE vs. ME	MSTRG.6482.1	-1.62448	0.687654
LE vs. ME	MSTRG.6703.1	-2.0756	0.216148
LE vs. ME	MSTRG.7231.1	0.561378	0.78569
LE vs. ME	MSTRG.7435.1	1.17209	0.773926
LE vs. ME	MSTRG.7810.1	0.298898	0.814166
LE vs. ME	MSTRG.8003.1	-1.04193	0.589041
LE vs. ME	MSTRG.8321.1	0.880898	0.637449
LE vs. ME	MSTRG.8351.6	0.185978	0.697669
LE vs. ME	MSTRG.8418.1	-0.236528	0.673203
LE vs. ME	MSTRG.8949.1	0.434053	0.42387
LE vs. ME	MSTRG.9216.5	0.448089	0.413692
LE vs. ME	MSTRG.9355.2	-0.569458	0.724716
LE vs. ME	MSTRG.9428.1	1.15028	0.617852
LE vs. ME	MSTRG.9477.1	-0.515505	0.582763
LE vs. ME	MSTRG.9588.1	-0.751463	0.853887
LE vs. ME	MSTRG.9743.1	-0.480551	0.723766
LE vs. ME	MSTRG.10034.1	-0.173806	0.863226
LE vs. ME	MSTRG.10508.5	-1.24955	0.408287
LE vs. ME	MSTRG.10580.1	-1.0798	0.534939
LE vs. ME	MSTRG.10806.2	0.152048	0.80457
LE vs. ME	MSTRG.11114.1	-2.12233	0.17019
LE vs. ME	MSTRG.11377.1	-0.751463	0.853887
LE vs. ME	MSTRG.8058.1	-3.038	0.266539
LE vs. ME	MSTRG.8756.1	-2.10969	0.598163
LE vs. ME	MSTRG.9369.1	0.288166	0.915262
LE vs. ME	MSTRG.9392.2	-0.251216	0.929575
LE vs. ME	MSTRG.9475.1	2.26165	0.191514
LE vs. ME	MSTRG.9497.1	-1.28778	0.144343
LE vs. ME	MSTRG.10028.1	0.888247	0.189051
LE vs. ME	MSTRG.10107.1	-0.793028	0.413132
LE vs. ME	MSTRG.10440.1	-0.881094	0.382345
LE vs. ME	MSTRG.10837.1	-0.751463	0.853887
LE vs. ME	MSTRG.11133.1	1.91212	0.0217225
LE vs. ME	MSTRG.11781.1	1.42524	0.130883
LE vs. ME	MSTRG.12265.1	3.07497	0.363028
LE vs. ME	MSTRG.12352.1	0.00169291	0.997174
LE vs. ME	MSTRG.12447.1	-1.88736	0.374401
LE vs. ME	MSTRG.12511.1	-0.877456	0.375871
LE vs. ME	MSTRG.13196.1	0.210318	0.958893
LE vs. ME	MSTRG.13570.1	0.0640616	0.982862
LE vs. ME	MSTRG.13579.1	0.556375	0.582661
LE vs. ME	MSTRG.13670.1	-1.02498	0.365468
LE vs. ME	MSTRG.13803.1	-1.15723	0.703934
LE vs. ME	MSTRG.11883.2	-0.463136	0.451596
LE vs. ME	MSTRG.12473.1	-2.30442	0.179459
LE vs. ME	MSTRG.13136.1	2.08229	0.605949
LE vs. ME	MSTRG.13553.1	-0.134355	0.865247
LE vs. ME	MSTRG.13847.1	-4.25919	0.105021
LE vs. ME	MSTRG.14146.2	0.711384	0.449687
LE vs. ME	MSTRG.14247.1	-3.37627	0.00507639
LE vs. ME	MSTRG.14398.1	0.250281	0.843367
LE vs. ME	MSTRG.15480.1	0.420142	0.612912
LE vs. ME	MSTRG.15627.1	-1.10384	0.270776
LE vs. ME	MSTRG.13897.2	0.210318	0.958893
LE vs. ME	MSTRG.14120.1	-0.932991	0.383338
LE vs. ME	MSTRG.14276.1	1.37856	0.0243025
LE vs. ME	MSTRG.15165.2	2.71469	0.0396888
LE vs. ME	MSTRG.15233.1	-0.157098	0.879406
LE vs. ME	MSTRG.15546.1	-0.4674	0.907995
LE vs. ME	MSTRG.15715.1	0.18489	0.871586
LE vs. ME	MSTRG.15798.5	2.1368	0.168444
LE vs. ME	MSTRG.15858.1	3.13621	0.0702326
LE vs. ME	MSTRG.15936.2	-0.590283	0.310052
LE vs. ME	MSTRG.15949.1	-0.78922	0.806934
LE vs. ME	MSTRG.16692.1	0.436711	0.707339
LE vs. ME	MSTRG.17053.1	-0.129906	0.945526
LE vs. ME	MSTRG.17059.3	-1.40113	0.0720488
LE vs. ME	MSTRG.16286.1	0.0196543	0.988917
LE vs. ME	MSTRG.16674.1	-0.708221	0.602189
LE vs. ME	MSTRG.16694.2	0.523471	0.469244
LE vs. ME	MSTRG.17002.1	0.210318	0.958893
LE vs. ME	MSTRG.17221.1	0.734	0.491445
LE vs. ME	MSTRG.17353.1	0.450621	0.719716
LE vs. ME	MSTRG.17414.1	-0.125512	0.873688
LE vs. ME	MSTRG.17430.1	-1.24973	0.679065
LE vs. ME	MSTRG.17463.1	1.17209	0.773926
LE vs. ME	MSTRG.17804.1	-0.258852	NA
LE vs. ME	MSTRG.18043.1	1.17209	0.773926
LE vs. ME	MSTRG.18059.1	-0.621383	0.851171
LE vs. ME	MSTRG.18208.1	0.189653	0.894974
LE vs. ME	MSTRG.17129.7	1.48446	0.46414
LE vs. ME	MSTRG.17217.8	1.9534	0.161543
LE vs. ME	MSTRG.17409.1	-3.1785	0.220868
LE vs. ME	MSTRG.17475.1	-0.9851	0.495274
LE vs. ME	MSTRG.17961.1	8.31888	2.58e-08
LE vs. ME	MSTRG.18030.1	-3.53701	0.149993
LE vs. ME	MSTRG.18074.2	-0.751463	0.853887
LE vs. ME	MSTRG.18250.1	-0.621504	0.850512
LE vs. ME	MSTRG.18325.2	0.203278	0.844029
LE vs. ME	MSTRG.18515.1	2.66481	0.305871
LE vs. ME	MSTRG.18602.1	0.26705	0.609661
LE vs. ME	MSTRG.18750.1	1.17209	0.773926
LE vs. ME	MSTRG.18742.1	-0.751463	0.853887
LE vs. ME	MSTRG.19011.1	-4.15876	0.10577
LE vs. ME	MSTRG.18290.1	-0.834056	0.622515
LE vs. ME	MSTRG.18513.4	-1.00276	0.137497
LE vs. ME	MSTRG.18591.2	0.282922	0.56208
LE vs. ME	MSTRG.19085.1	0.0538857	0.959975
LE vs. ME	MSTRG.19408.1	7.37229	2.22e-05
LE vs. ME	MSTRG.19403.1	-1.42891	0.724852
LE vs. ME	MSTRG.19465.1	0.0948336	0.908195
LE vs. ME	MSTRG.19813.1	2.59177	0.102878
LE vs. ME	MSTRG.20176.1	1.17209	0.773926
LE vs. ME	MSTRG.20276.1	1.17209	0.773926
LE vs. ME	MSTRG.21239.1	-0.173127	0.788556
LE vs. ME	MSTRG.21529.1	-0.76697	0.589287
LE vs. ME	MSTRG.21786.1	6.57486	0.0928746
LE vs. ME	MSTRG.21938.1	0.522465	0.402349
LE vs. ME	MSTRG.22286.1	1.17181	0.529596
LE vs. ME	MSTRG.22753.1	1.1262	0.772495
LE vs. ME	MSTRG.19447.2	0.479006	0.441342
LE vs. ME	MSTRG.19466.4	1.46021	0.107425
LE vs. ME	MSTRG.20271.1	1.28968	0.636146
LE vs. ME	MSTRG.20376.1	-0.890179	0.233494
LE vs. ME	MSTRG.20418.1	-0.825766	0.4646
LE vs. ME	MSTRG.20886.1	0.33644	0.755959
LE vs. ME	MSTRG.21160.1	-3.27641	0.00460477
LE vs. ME	MSTRG.22124.2	1.03	0.0819664
LE vs. ME	MSTRG.22311.1	0.28294	0.832599
LE vs. ME	MSTRG.22783.1	-0.751463	0.853887
LE vs. ME	MSTRG.22906.1	-1.43133	0.222961
LE vs. ME	MSTRG.23464.1	-0.68119	0.732327
LE vs. ME	MSTRG.23511.2	1.17209	0.773926
LE vs. ME	MSTRG.23719.1	0.83676	0.480181
LE vs. ME	MSTRG.23866.1	0.01268	0.988784
LE vs. ME	MSTRG.24368.1	-0.767376	0.468578
LE vs. ME	MSTRG.24394.2	-0.227511	0.868248
LE vs. ME	MSTRG.24410.1	0.24169	0.609615
LE vs. ME	MSTRG.25178.1	-0.390431	0.703874
LE vs. ME	MSTRG.25280.1	-0.751463	0.853887
LE vs. ME	MSTRG.25304.1	0.705397	0.542965
LE vs. ME	MSTRG.22827.1	-0.863439	0.598245
LE vs. ME	MSTRG.22924.1	-0.491158	0.841258
LE vs. ME	MSTRG.23529.1	1.17209	0.773926
LE vs. ME	MSTRG.23643.12	-0.522657	0.470471
LE vs. ME	MSTRG.23705.1	-1.25163	0.141841
LE vs. ME	MSTRG.23924.1	-0.169	0.947178
LE vs. ME	MSTRG.23955.1	-0.460314	0.638713
LE vs. ME	MSTRG.24128.1	-0.0151403	0.994164
LE vs. ME	MSTRG.24710.1	-0.0486792	0.938084
LE vs. ME	MSTRG.24718.1	1.17209	0.773926
LE vs. ME	MSTRG.24927.3	0.403523	0.414936
LE vs. ME	MSTRG.25201.1	1.95194	0.0956194
LE vs. ME	MSTRG.25205.1	-0.751463	0.853887
LE vs. ME	MSTRG.26049.1	1.09878	0.664899
LE vs. ME	MSTRG.26084.1	-2.25507	0.00292429
LE vs. ME	MSTRG.26134.1	-0.116502	0.938014
LE vs. ME	MSTRG.26428.1	-1.22871	0.100376
LE vs. ME	MSTRG.27166.1	0.245232	0.935165
LE vs. ME	MSTRG.27437.1	0.981222	0.442852
LE vs. ME	MSTRG.27595.1	0.306847	0.698484
LE vs. ME	MSTRG.27665.1	-3.86032	0.0422539
LE vs. ME	MSTRG.25418.1	0.13957	0.951711
LE vs. ME	MSTRG.25553.1	-4.88144	0.00133558
LE vs. ME	MSTRG.25814.1	0.402161	0.520894
LE vs. ME	MSTRG.26082.1	1.17209	0.773926
LE vs. ME	MSTRG.26092.1	-0.362036	0.616754
LE vs. ME	MSTRG.26164.1	1.17209	0.773926
LE vs. ME	MSTRG.26361.1	0.845971	0.53878
LE vs. ME	MSTRG.26914.1	4.08778	0.136893
LE vs. ME	MSTRG.27058.1	1.126	0.766104
LE vs. ME	MSTRG.27492.1	3.08957	0.436646
LE vs. ME	MSTRG.27572.1	-1.42891	0.724852
LE vs. ME	MSTRG.27626.1	2.15647	0.293388
LE vs. ME	MSTRG.27741.1	0.119863	0.863203
LE vs. ME	MSTRG.27746.2	-1.2421	0.201989
LE vs. ME	MSTRG.28010.1	-0.586672	0.760028
LE vs. ME	MSTRG.28207.1	-3.79339	0.0804969
LE vs. ME	MSTRG.28724.1	-0.521623	0.616218
LE vs. ME	MSTRG.28752.1	0.869359	0.105141
LE vs. ME	MSTRG.28894.1	-0.199474	0.823332
LE vs. ME	MSTRG.29361.1	0.975617	0.379246
LE vs. ME	MSTRG.27816.1	0.927906	0.712947
LE vs. ME	MSTRG.28188.1	-0.887529	0.220472
LE vs. ME	MSTRG.28223.2	-2.40707	0.093249
LE vs. ME	MSTRG.28603.1	-4.20854	0.00316471
LE vs. ME	MSTRG.28968.11	1.10916	0.315149
LE vs. ME	MSTRG.29466.1	0.0400069	0.956315
LE vs. ME	MSTRG.29598.1	0.69366	0.420238
LE vs. ME	MSTRG.29899.1	-2.74662	0.0700732
LE vs. ME	MSTRG.29939.1	-0.0793103	0.933314
LE vs. ME	MSTRG.30034.1	-0.403254	0.495528
LE vs. ME	MSTRG.30119.7	0.210318	0.958893
LE vs. ME	MSTRG.30339.1	-0.946095	0.324587
LE vs. ME	MSTRG.30793.2	1.17209	0.773926
LE vs. ME	MSTRG.30793.3	0.786253	0.239527
LE vs. ME	MSTRG.31463.3	-0.124476	0.805136
LE vs. ME	MSTRG.31551.1	0.210318	0.958893
LE vs. ME	MSTRG.31715.1	0.0750518	0.972465
LE vs. ME	MSTRG.31847.1	0.621292	0.529344
LE vs. ME	MSTRG.32130.1	-0.0133238	0.990062
LE vs. ME	MSTRG.32263.1	-1.15687	0.205612
LE vs. ME	MSTRG.32291.1	-1.55316	0.152505
LE vs. ME	MSTRG.32315.1	3.37942	0.104411
LE vs. ME	MSTRG.32354.1	0.264464	0.859063
LE vs. ME	MSTRG.32664.2	-2.24069	0.48809
LE vs. ME	MSTRG.32887.2	1.17209	0.773926
LE vs. ME	MSTRG.33170.1	1.17209	0.773926
LE vs. ME	MSTRG.33214.1	0.763194	0.427512
LE vs. ME	MSTRG.33418.1	-0.237093	0.763701
LE vs. ME	MSTRG.29981.1	0.408071	0.645913
LE vs. ME	MSTRG.29995.1	0.338616	0.720985
LE vs. ME	MSTRG.30169.2	-0.259909	0.833689
LE vs. ME	MSTRG.30350.1	-2.0179	0.0908484
LE vs. ME	MSTRG.31014.1	2.63655	0.478368
LE vs. ME	MSTRG.31844.1	1.60073	NA
LE vs. ME	MSTRG.32390.2	0.00237107	0.996443
LE vs. ME	MSTRG.32811.1	0.142507	0.915381
LE vs. ME	MSTRG.33219.1	1.52107	0.26796
LE vs. ME	MSTRG.33622.4	-0.261801	0.696666
LE vs. ME	MSTRG.33662.1	-0.244636	0.839432
LE vs. ME	MSTRG.33671.1	2.05579	0.0651555
LE vs. ME	MSTRG.33719.1	0.816174	0.712371
LE vs. ME	MSTRG.33769.1	-1.30158	0.169151
LE vs. ME	MSTRG.33930.1	-1.40253	0.224833
LE vs. ME	MSTRG.34215.1	-0.0409176	0.971192
LE vs. ME	MSTRG.34232.1	-0.467788	0.907429
LE vs. ME	MSTRG.34409.1	-2.27251	0.555871
LE vs. ME	MSTRG.34547.1	0.210318	0.958893
LE vs. ME	MSTRG.36143.1	1.17209	0.773926
LE vs. ME	MSTRG.33655.1	0.326002	0.890441
LE vs. ME	MSTRG.33779.1	0.181072	0.842974
LE vs. ME	MSTRG.34739.1	-2.81152	0.0744526
LE vs. ME	MSTRG.34944.1	0.142579	0.922637
LE vs. ME	MSTRG.35619.1	-0.278648	0.89082
LE vs. ME	MSTRG.35928.1	0.392837	0.740913
LE vs. ME	MSTRG.36128.1	1.07259	0.778617
LE vs. ME	MSTRG.36236.1	-0.16291	0.896787
LE vs. ME	MSTRG.36310.1	-4.43822	0.0307762
LE vs. ME	MSTRG.36372.2	-1.17321	0.501864
LE vs. ME	MSTRG.36579.1	2.91567	0.158969
LE vs. ME	MSTRG.36804.3	-0.564248	0.65597
LE vs. ME	MSTRG.37413.1	-0.453802	0.77329
LE vs. ME	MSTRG.37901.1	2.08819	0.604881
LE vs. ME	MSTRG.37931.1	-0.739858	0.640833
LE vs. ME	MSTRG.36272.2	-0.488288	0.416939
LE vs. ME	MSTRG.36286.1	1.83288	0.341474
LE vs. ME	MSTRG.36377.1	1.40917	0.307672
LE vs. ME	MSTRG.36410.2	0.649646	0.350468
LE vs. ME	MSTRG.36469.2	2.08229	0.605949
LE vs. ME	MSTRG.36685.2	-1.57851	0.696349
LE vs. ME	MSTRG.36813.1	0.210318	0.958893
LE vs. ME	MSTRG.37238.3	-0.818994	0.457019
LE vs. ME	MSTRG.37254.1	-0.467788	0.907429
LE vs. ME	MSTRG.38068.2	0.103911	0.961608
LE vs. ME	MSTRG.38073.1	4.3076	0.0127371
LE vs. ME	MSTRG.38116.1	-1.67544	0.141607
LE vs. ME	MSTRG.38814.1	-0.376171	0.694665
LE vs. ME	MSTRG.38941.1	-0.879173	0.710059
LE vs. ME	MSTRG.39059.9	0.62312	0.756322
LE vs. ME	MSTRG.39106.1	0.232639	0.657274
LE vs. ME	MSTRG.39111.1	0.441549	0.726985
LE vs. ME	MSTRG.39461.2	-0.484321	0.752197
LE vs. ME	MSTRG.40140.3	0.745795	0.379387
LE vs. ME	MSTRG.40388.3	0.183007	0.861318
LE vs. ME	MSTRG.40448.1	1.17209	0.773926
LE vs. ME	MSTRG.40511.1	0.383833	0.501196
LE vs. ME	MSTRG.40566.1	0.0098549	0.994304
LE vs. ME	MSTRG.40570.8	0.441517	0.354848
LE vs. ME	MSTRG.40575.1	1.01973	0.586237
LE vs. ME	MSTRG.40589.1	-0.266514	0.866028
LE vs. ME	MSTRG.40640.1	1.0999	0.737315
LE vs. ME	MSTRG.38488.1	-0.576696	0.425954
LE vs. ME	MSTRG.38781.1	1.17209	0.773926
LE vs. ME	MSTRG.38833.1	0.123926	0.84766
LE vs. ME	MSTRG.39058.1	1.17209	0.773926
LE vs. ME	MSTRG.39166.1	0.709376	0.771293
LE vs. ME	MSTRG.39568.2	0.498786	0.707333
LE vs. ME	MSTRG.39704.2	-0.61858	0.66825
LE vs. ME	MSTRG.39961.1	0.235608	0.874962
LE vs. ME	MSTRG.40561.1	-0.751463	0.853887
LE vs. ME	MSTRG.40667.2	-0.702043	0.39805
LE vs. ME	MSTRG.40799.1	1.30418	0.494181
LE vs. ME	MSTRG.40837.1	2.08819	0.604881
LE vs. ME	MSTRG.40997.1	-0.901463	0.371524
LE vs. ME	MSTRG.41060.1	0.599462	0.553381
LE vs. ME	MSTRG.41070.2	-2.76447	0.419753
LE vs. ME	MSTRG.41212.1	-2.00318	0.617406
LE vs. ME	MSTRG.41281.1	0.488949	0.26043
LE vs. ME	MSTRG.41418.1	1.19631	0.309653
LE vs. ME	MSTRG.41438.1	-0.79042	0.350652
LE vs. ME	MSTRG.41542.1	0.368634	0.571573
LE vs. ME	MSTRG.41792.1	0.325371	0.888683
LE vs. ME	MSTRG.41859.5	2.31077	0.308343
LE vs. ME	MSTRG.41853.1	0.34515	0.854684
LE vs. ME	MSTRG.41993.1	1.12022	0.767465
LE vs. ME	MSTRG.42188.1	0.702539	0.509936
LE vs. ME	MSTRG.42208.1	-0.62154	0.506518
LE vs. ME	MSTRG.42227.1	0.0935498	0.966322
LE vs. ME	MSTRG.42391.2	0.0508181	0.911485
LE vs. ME	MSTRG.42714.1	-0.751463	0.853887
LE vs. ME	MSTRG.42778.1	-1.32987	0.275431
LE vs. ME	MSTRG.43864.1	2.05815	0.610323
LE vs. ME	MSTRG.42715.1	-0.948054	0.549498
LE vs. ME	MSTRG.42804.1	1.50106	0.494963
LE vs. ME	MSTRG.43366.1	-0.499278	0.6405
LE vs. ME	MSTRG.43488.2	0.360944	0.518427
LE vs. ME	MSTRG.43721.1	-0.751463	0.853887
LE vs. ME	MSTRG.44118.2	-0.106194	0.865785
LE vs. ME	MSTRG.44122.5	-0.751463	0.853887
LE vs. ME	MSTRG.44147.1	1.42207	0.220325
LE vs. ME	MSTRG.44147.3	0.948235	0.443265

## Sheet: lincRNA-vagina
Differential expression analysis of lincRNA in vagina
culster	gene	log2FoldChange	pvalue
LD vs. LE	MSTRG.18.2	-5.82777	0.00578551
LD vs. LE	MSTRG.650.1	0.854319	0.632201
LD vs. LE	MSTRG.794.1	-1.49754	0.711013
LD vs. LE	MSTRG.795.1	-2.98393	0.374696
LD vs. LE	MSTRG.868.1	-0.605463	0.790323
LD vs. LE	MSTRG.1266.1	1.15241	0.472998
LD vs. LE	MSTRG.1581.1	0.256781	0.804292
LD vs. LE	MSTRG.1617.3	-0.332628	0.58084
LD vs. LE	MSTRG.1870.2	-0.728944	0.43817
LD vs. LE	MSTRG.2181.1	-0.601055	0.863843
LD vs. LE	MSTRG.2633.2	-0.32365	0.78846
LD vs. LE	MSTRG.2685.1	0.826733	0.239288
LD vs. LE	MSTRG.2692.1	0.172993	0.854974
LD vs. LE	MSTRG.2916.1	1.47578	0.0748243
LD vs. LE	MSTRG.3359.2	0.695268	0.119493
LD vs. LE	MSTRG.3589.1	2.14119	0.596183
LD vs. LE	MSTRG.242.1	-0.692125	0.446019
LD vs. LE	MSTRG.246.4	0.314785	0.938509
LD vs. LE	MSTRG.374.1	0.223283	0.739686
LD vs. LE	MSTRG.375.1	2.21751	0.465026
LD vs. LE	MSTRG.590.1	3.55127	0.0770614
LD vs. LE	MSTRG.1435.1	-4.07843	0.225523
LD vs. LE	MSTRG.1481.1	0.556608	0.537111
LD vs. LE	MSTRG.1587.1	0.866395	0.0431944
LD vs. LE	MSTRG.1699.1	-0.181723	0.68158
LD vs. LE	MSTRG.2174.1	-2.1841	0.208404
LD vs. LE	MSTRG.2359.1	-1.12467	0.342522
LD vs. LE	MSTRG.2649.1	3.98438	0.0094868
LD vs. LE	MSTRG.3244.5	2.5656	NA
LD vs. LE	MSTRG.3564.4	1.84092	0.139694
LD vs. LE	MSTRG.3637.1	2.64015	0.0944024
LD vs. LE	MSTRG.3731.1	0.614667	0.436225
LD vs. LE	MSTRG.3901.1	-0.646996	0.874016
LD vs. LE	MSTRG.4155.1	-0.433858	0.66871
LD vs. LE	MSTRG.4222.1	1.27656	0.754398
LD vs. LE	MSTRG.4263.1	1.63841	0.409942
LD vs. LE	MSTRG.4299.1	-1.59146	0.104429
LD vs. LE	MSTRG.4391.1	0.288431	0.700707
LD vs. LE	MSTRG.4580.1	0.190416	0.889865
LD vs. LE	MSTRG.4896.1	0.0825519	0.865527
LD vs. LE	MSTRG.5009.11	0.482143	0.694195
LD vs. LE	MSTRG.5233.1	-0.0943402	0.965562
LD vs. LE	MSTRG.5287.2	0.270059	0.9183
LD vs. LE	MSTRG.4228.4	0.125245	0.887832
LD vs. LE	MSTRG.4314.1	0.972301	0.289392
LD vs. LE	MSTRG.4377.1	0.991725	0.358452
LD vs. LE	MSTRG.4390.1	0.589411	0.435013
LD vs. LE	MSTRG.4907.1	1.12882	0.393805
LD vs. LE	MSTRG.5267.1	-1.49	0.318826
LD vs. LE	MSTRG.5640.1	-0.891083	0.358075
LD vs. LE	MSTRG.5838.1	-1.22885	0.711017
LD vs. LE	MSTRG.5487.1	-0.297055	0.418319
LD vs. LE	MSTRG.5675.1	1.05393	0.172085
LD vs. LE	MSTRG.5677.1	1.55579	0.0814629
LD vs. LE	MSTRG.5779.1	-0.991682	0.377561
LD vs. LE	MSTRG.6308.1	-5.31536	0.0696075
LD vs. LE	MSTRG.6409.1	1.61734	0.080275
LD vs. LE	MSTRG.6415.1	3.21943	0.417495
LD vs. LE	MSTRG.6477.1	-1.57666	0.180887
LD vs. LE	MSTRG.6478.1	1.47788	0.387398
LD vs. LE	MSTRG.6515.1	-0.476462	0.764233
LD vs. LE	MSTRG.7017.1	1.10723	0.417065
LD vs. LE	MSTRG.7268.1	-0.273267	0.606473
LD vs. LE	MSTRG.7818.1	3.95993	0.244072
LD vs. LE	MSTRG.6482.1	2.81794	0.219737
LD vs. LE	MSTRG.6703.1	1.10105	0.785628
LD vs. LE	MSTRG.7231.1	3.18935	0.00456363
LD vs. LE	MSTRG.7435.1	1.27656	0.754398
LD vs. LE	MSTRG.7810.1	-0.209851	0.856034
LD vs. LE	MSTRG.8003.1	-3.17064	0.0475795
LD vs. LE	MSTRG.8321.1	1.40712	0.409593
LD vs. LE	MSTRG.8351.6	-0.452192	0.238241
LD vs. LE	MSTRG.8418.1	1.00916	0.328868
LD vs. LE	MSTRG.8949.1	1.0128	0.0395112
LD vs. LE	MSTRG.9216.5	-0.202608	0.521458
LD vs. LE	MSTRG.9355.2	-1.2035	0.390487
LD vs. LE	MSTRG.9428.1	-0.661542	0.782389
LD vs. LE	MSTRG.9477.1	0.613588	0.763877
LD vs. LE	MSTRG.9588.1	-1.62827	0.686218
LD vs. LE	MSTRG.9743.1	1.25206	0.230644
LD vs. LE	MSTRG.10034.1	-1.3094	0.49558
LD vs. LE	MSTRG.10508.5	4.26626	0.000126091
LD vs. LE	MSTRG.10580.1	2.64261	0.509036
LD vs. LE	MSTRG.10806.2	0.228312	0.730842
LD vs. LE	MSTRG.11114.1	-1.14497	0.307063
LD vs. LE	MSTRG.8058.1	-3.38652	0.358795
LD vs. LE	MSTRG.8756.1	1.26815	0.591275
LD vs. LE	MSTRG.9369.1	-0.813704	0.57454
LD vs. LE	MSTRG.9392.2	-0.542041	0.893306
LD vs. LE	MSTRG.9475.1	-4.20422	0.220396
LD vs. LE	MSTRG.9497.1	2.06283	0.610347
LD vs. LE	MSTRG.10028.1	-1.60178	0.515737
LD vs. LE	MSTRG.10107.1	1.86309	0.620416
LD vs. LE	MSTRG.10440.1	1.2617	0.248861
LD vs. LE	MSTRG.10597.1	-3.11708	0.263385
LD vs. LE	MSTRG.10909.1	-5.69893	NA
LD vs. LE	MSTRG.11133.1	-0.0260568	0.970015
LD vs. LE	MSTRG.11381.1	-6.27677	0.00241076
LD vs. LE	MSTRG.11781.1	0.38139	0.704343
LD vs. LE	MSTRG.12265.1	-1.8375	0.41526
LD vs. LE	MSTRG.12352.1	-0.0627319	0.909519
LD vs. LE	MSTRG.12447.1	-4.7077	0.00446024
LD vs. LE	MSTRG.12511.1	1.1997	0.364877
LD vs. LE	MSTRG.12852.1	-0.646996	0.874016
LD vs. LE	MSTRG.13196.1	-1.49754	0.711013
LD vs. LE	MSTRG.13554.2	-1.62827	0.686218
LD vs. LE	MSTRG.13570.1	-0.646996	0.874016
LD vs. LE	MSTRG.13579.1	-0.42844	0.746894
LD vs. LE	MSTRG.13609.1	-3.72822	0.282098
LD vs. LE	MSTRG.13670.1	1.87344	0.132398
LD vs. LE	MSTRG.13803.1	5.80707	0.138248
LD vs. LE	MSTRG.11883.2	0.755889	0.227165
LD vs. LE	MSTRG.12473.1	-0.809602	0.765497
LD vs. LE	MSTRG.13136.1	0.402561	0.90198
LD vs. LE	MSTRG.13553.1	0.427704	0.335366
LD vs. LE	MSTRG.13847.1	2.8195	0.479903
LD vs. LE	MSTRG.14247.1	0.427944	0.740279
LD vs. LE	MSTRG.14398.1	-0.465975	0.784461
LD vs. LE	MSTRG.15480.1	-0.223683	0.880448
LD vs. LE	MSTRG.15746.1	1.27656	0.754398
LD vs. LE	MSTRG.13897.2	4.3479	0.0989741
LD vs. LE	MSTRG.14120.1	-0.00197719	0.998849
LD vs. LE	MSTRG.14276.1	0.428219	0.545904
LD vs. LE	MSTRG.15165.2	-0.669974	0.821137
LD vs. LE	MSTRG.15233.1	0.304386	0.706038
LD vs. LE	MSTRG.15546.1	0.314785	0.938509
LD vs. LE	MSTRG.15715.1	2.93719	0.0249178
LD vs. LE	MSTRG.15798.5	-0.290266	0.785875
LD vs. LE	MSTRG.15858.1	1.5091	0.450672
LD vs. LE	MSTRG.15936.2	-0.635349	0.292849
LD vs. LE	MSTRG.15949.1	2.25766	0.569652
LD vs. LE	MSTRG.16692.1	-3.54401	0.276522
LD vs. LE	MSTRG.17053.1	0.314785	0.938509
LD vs. LE	MSTRG.17059.3	5.21761	0.183505
LD vs. LE	MSTRG.16042.15	-0.54124	0.876337
LD vs. LE	MSTRG.16286.1	0.304477	0.814542
LD vs. LE	MSTRG.16674.1	-0.319983	0.764459
LD vs. LE	MSTRG.16694.2	-0.282092	0.709708
LD vs. LE	MSTRG.17002.1	0.314785	0.938509
LD vs. LE	MSTRG.17221.1	1.0084	0.490214
LD vs. LE	MSTRG.17353.1	6.13418	0.106865
LD vs. LE	MSTRG.17414.1	-0.284687	0.714943
LD vs. LE	MSTRG.17419.1	-0.646996	0.874016
LD vs. LE	MSTRG.17430.1	-3.54979	0.0686343
LD vs. LE	MSTRG.17804.1	-2.87074	0.0437367
LD vs. LE	MSTRG.18059.1	-1.58492	0.077947
LD vs. LE	MSTRG.18208.1	2.11084	0.0576177
LD vs. LE	MSTRG.17129.7	1.59877	0.173076
LD vs. LE	MSTRG.17217.8	1.67796	0.315675
LD vs. LE	MSTRG.17409.1	1.27656	0.754398
LD vs. LE	MSTRG.17475.1	-1.0214	0.501839
LD vs. LE	MSTRG.17777.1	1.27656	0.754398
LD vs. LE	MSTRG.17961.1	0.16424	0.956798
LD vs. LE	MSTRG.18030.1	-5.48337	0.0186864
LD vs. LE	MSTRG.18074.2	-0.646996	0.874016
LD vs. LE	MSTRG.18325.2	-1.03173	0.278482
LD vs. LE	MSTRG.18515.1	-4.18055	0.204172
LD vs. LE	MSTRG.18602.1	0.124492	0.7268
LD vs. LE	MSTRG.18742.1	1.36205	0.437142
LD vs. LE	MSTRG.19011.1	2.80039	0.0751066
LD vs. LE	MSTRG.19203.1	-0.646996	0.874016
LD vs. LE	MSTRG.18290.1	-0.347606	0.806334
LD vs. LE	MSTRG.18513.4	0.0823574	0.879417
LD vs. LE	MSTRG.18591.2	-0.385811	0.404214
LD vs. LE	MSTRG.19085.1	2.14119	0.596183
LD vs. LE	MSTRG.19403.1	-1.56907	0.617779
LD vs. LE	MSTRG.19465.1	-0.670491	0.510918
LD vs. LE	MSTRG.19813.1	-0.417992	0.481711
LD vs. LE	MSTRG.20176.1	-5.67778	3.83387e-07
LD vs. LE	MSTRG.20276.1	1.99065	0.554445
LD vs. LE	MSTRG.20288.1	-4.409	0.188743
LD vs. LE	MSTRG.21239.1	0.434407	0.371185
LD vs. LE	MSTRG.21529.1	-0.646996	0.874016
LD vs. LE	MSTRG.21938.1	0.491899	0.297857
LD vs. LE	MSTRG.22286.1	-1.5574	0.335237
LD vs. LE	MSTRG.19447.2	0.274358	0.590747
LD vs. LE	MSTRG.19466.4	-0.893726	0.499339
LD vs. LE	MSTRG.20271.1	-2.08036	0.602779
LD vs. LE	MSTRG.20376.1	-1.16443	0.26509
LD vs. LE	MSTRG.20418.1	0.314785	0.938509
LD vs. LE	MSTRG.20886.1	-0.187355	0.86402
LD vs. LE	MSTRG.21160.1	-0.397619	0.615867
LD vs. LE	MSTRG.21559.1	-0.646996	0.874016
LD vs. LE	MSTRG.21737.1	2.98073	0.168065
LD vs. LE	MSTRG.22124.2	0.061799	0.932769
LD vs. LE	MSTRG.22311.1	0.0513626	0.976755
LD vs. LE	MSTRG.22783.1	-4.3118	0.0977544
LD vs. LE	MSTRG.22836.1	-1.4918	0.310496
LD vs. LE	MSTRG.22906.1	1.09524	0.177305
LD vs. LE	MSTRG.23511.2	-0.600943	0.862292
LD vs. LE	MSTRG.23719.1	-1.29956	0.462998
LD vs. LE	MSTRG.23866.1	-0.645711	0.477335
LD vs. LE	MSTRG.24368.1	4.18556	NA
LD vs. LE	MSTRG.24394.2	-1.03109	0.125655
LD vs. LE	MSTRG.24410.1	-0.894006	0.0665416
LD vs. LE	MSTRG.25178.1	0.232155	0.808173
LD vs. LE	MSTRG.25224.2	1.27656	0.754398
LD vs. LE	MSTRG.25304.1	0.198828	0.890394
LD vs. LE	MSTRG.22827.1	1.49682	0.320222
LD vs. LE	MSTRG.22924.1	-6.04241	0.00483206
LD vs. LE	MSTRG.23643.12	-0.390093	0.505513
LD vs. LE	MSTRG.23705.1	-0.780524	0.257831
LD vs. LE	MSTRG.23924.1	-0.771879	0.799116
LD vs. LE	MSTRG.23955.1	0.173056	0.812775
LD vs. LE	MSTRG.24128.1	-0.892529	0.684999
LD vs. LE	MSTRG.24710.1	-1.04689	0.112139
LD vs. LE	MSTRG.24718.1	-1.50068	0.710413
LD vs. LE	MSTRG.24927.3	1.01941	0.0622106
LD vs. LE	MSTRG.25201.1	3.79996	6.98243e-05
LD vs. LE	MSTRG.25205.1	-0.646996	0.874016
LD vs. LE	MSTRG.25675.1	-1.12516	0.778335
LD vs. LE	MSTRG.26049.1	1.27656	0.754398
LD vs. LE	MSTRG.26084.1	-0.646996	0.874016
LD vs. LE	MSTRG.26134.1	2.94809	0.00552566
LD vs. LE	MSTRG.26428.1	2.59917	0.00230611
LD vs. LE	MSTRG.27166.1	-1.40753	0.531684
LD vs. LE	MSTRG.27437.1	-0.23324	0.887515
LD vs. LE	MSTRG.27595.1	-0.87782	0.035032
LD vs. LE	MSTRG.27612.1	2.06283	0.610347
LD vs. LE	MSTRG.27665.1	1.86142	NA
LD vs. LE	MSTRG.25553.1	-0.46464	0.653287
LD vs. LE	MSTRG.25814.1	1.63848	0.0429205
LD vs. LE	MSTRG.26009.1	1.27656	0.754398
LD vs. LE	MSTRG.26092.1	3.73386	0.160235
LD vs. LE	MSTRG.26164.1	1.23152	0.611246
LD vs. LE	MSTRG.26361.1	-0.438399	0.738325
LD vs. LE	MSTRG.27389.1	0.282019	0.914668
LD vs. LE	MSTRG.27492.1	3.22732	0.013945
LD vs. LE	MSTRG.27494.1	-0.646996	0.874016
LD vs. LE	MSTRG.27572.1	-1.53249	0.555818
LD vs. LE	MSTRG.27626.1	1.06371	0.590181
LD vs. LE	MSTRG.27711.1	-1.49754	0.711013
LD vs. LE	MSTRG.27741.1	1.04717	0.301809
LD vs. LE	MSTRG.27746.2	2.75141	0.49101
LD vs. LE	MSTRG.28010.1	2.09308	0.598818
LD vs. LE	MSTRG.28207.1	1.852	0.33598
LD vs. LE	MSTRG.28724.1	1.12621	0.246593
LD vs. LE	MSTRG.28747.1	-2.71577	0.102594
LD vs. LE	MSTRG.28752.1	-0.0470045	0.937249
LD vs. LE	MSTRG.28894.1	-0.241515	0.774296
LD vs. LE	MSTRG.29361.1	-4.80856	2.93143e-05
LD vs. LE	MSTRG.29725.1	2.23962	0.578586
LD vs. LE	MSTRG.29746.1	-1.62827	0.686218
LD vs. LE	MSTRG.27816.1	1.59481	0.58336
LD vs. LE	MSTRG.28188.1	-5.81552	0.000470904
LD vs. LE	MSTRG.28968.11	-1.48208	0.127501
LD vs. LE	MSTRG.29466.1	0.878329	0.282981
LD vs. LE	MSTRG.29598.1	3.27581	0.0392061
LD vs. LE	MSTRG.29852.1	1.27656	0.754398
LD vs. LE	MSTRG.29899.1	-0.388067	0.681194
LD vs. LE	MSTRG.29939.1	2.41139	0.0109273
LD vs. LE	MSTRG.30034.1	-0.532626	0.414784
LD vs. LE	MSTRG.30119.7	-0.541024	0.87786
LD vs. LE	MSTRG.30339.1	1.97401	0.298612
LD vs. LE	MSTRG.30793.3	-0.646996	0.874016
LD vs. LE	MSTRG.31463.3	0.0211284	0.963995
LD vs. LE	MSTRG.31551.1	-0.646996	0.874016
LD vs. LE	MSTRG.31715.1	-2.01874	0.317984
LD vs. LE	MSTRG.31847.1	0.059339	0.950051
LD vs. LE	MSTRG.32130.1	1.01996	0.349466
LD vs. LE	MSTRG.32263.1	0.416542	0.532904
LD vs. LE	MSTRG.32291.1	-0.881023	0.526685
LD vs. LE	MSTRG.32354.1	0.149271	0.89445
LD vs. LE	MSTRG.32664.2	-0.646996	0.874016
LD vs. LE	MSTRG.32887.2	-0.646996	0.874016
LD vs. LE	MSTRG.33214.1	-1.51654	0.405203
LD vs. LE	MSTRG.33418.1	1.85787	0.173042
LD vs. LE	MSTRG.29981.1	1.27656	0.754398
LD vs. LE	MSTRG.29995.1	-0.912265	0.334108
LD vs. LE	MSTRG.30169.2	1.199	0.300205
LD vs. LE	MSTRG.31014.1	0.314785	0.938509
LD vs. LE	MSTRG.31992.1	1.27656	0.754398
LD vs. LE	MSTRG.32236.1	4.58181	0.157159
LD vs. LE	MSTRG.32382.1	-0.646996	0.874016
LD vs. LE	MSTRG.32390.2	0.203492	0.66357
LD vs. LE	MSTRG.32811.1	-0.0248682	0.983549
LD vs. LE	MSTRG.33219.1	-2.48023	0.140002
LD vs. LE	MSTRG.33622.4	0.298996	0.871151
LD vs. LE	MSTRG.33662.1	2.00134	0.0109544
LD vs. LE	MSTRG.33671.1	-0.421026	0.642299
LD vs. LE	MSTRG.33719.1	-1.34751	0.531143
LD vs. LE	MSTRG.33769.1	1.27656	0.754398
LD vs. LE	MSTRG.33930.1	4.09692	6.93785e-05
LD vs. LE	MSTRG.34215.1	-0.136887	0.907099
LD vs. LE	MSTRG.34232.1	0.116312	0.935097
LD vs. LE	MSTRG.34409.1	1.05857	0.620521
LD vs. LE	MSTRG.35320.10	-4.5101	0.0187848
LD vs. LE	MSTRG.36143.1	3.40109	0.188048
LD vs. LE	MSTRG.33655.1	-5.60331	0.000997007
LD vs. LE	MSTRG.33779.1	-5.08022	0.0198122
LD vs. LE	MSTRG.33824.1	-5.19783	0.0963584
LD vs. LE	MSTRG.34944.1	-0.637242	0.782397
LD vs. LE	MSTRG.35303.1	-5.53153	0.00211006
LD vs. LE	MSTRG.35619.1	1.31101	0.466227
LD vs. LE	MSTRG.35928.1	0.594727	0.46345
LD vs. LE	MSTRG.36236.1	1.66511	0.283155
LD vs. LE	MSTRG.36310.1	-2.84841	0.332918
LD vs. LE	MSTRG.36372.2	-0.421444	0.675743
LD vs. LE	MSTRG.36579.1	-2.304	0.0221511
LD vs. LE	MSTRG.36620.1	-0.646996	0.874016
LD vs. LE	MSTRG.36804.3	-1.21505	0.0836735
LD vs. LE	MSTRG.37901.1	-2.43785	0.29528
LD vs. LE	MSTRG.37931.1	-4.40472	0.000195591
LD vs. LE	MSTRG.36272.2	-0.4623	0.442099
LD vs. LE	MSTRG.36286.1	0.364065	0.875555
LD vs. LE	MSTRG.36368.1	6.46472	NA
LD vs. LE	MSTRG.36377.1	-1.22323	0.323534
LD vs. LE	MSTRG.36410.2	0.543048	0.532653
LD vs. LE	MSTRG.36469.2	-5.25203	0.0916357
LD vs. LE	MSTRG.36565.1	-0.646996	0.874016
LD vs. LE	MSTRG.36685.2	-1.62827	0.686218
LD vs. LE	MSTRG.36813.1	2.40483	0.361485
LD vs. LE	MSTRG.36940.1	-0.406786	0.697367
LD vs. LE	MSTRG.37074.1	1.27656	0.754398
LD vs. LE	MSTRG.37238.3	2.03635	0.0215264
LD vs. LE	MSTRG.37254.1	2.20553	0.0946829
LD vs. LE	MSTRG.38068.2	-1.54073	0.417697
LD vs. LE	MSTRG.38116.1	-2.8324	0.0113064
LD vs. LE	MSTRG.38814.1	1.72198	0.292395
LD vs. LE	MSTRG.38941.1	-4.59732	0.147889
LD vs. LE	MSTRG.38941.2	-2.49424	0.530354
LD vs. LE	MSTRG.39059.9	0.314612	0.841629
LD vs. LE	MSTRG.39106.1	0.430893	0.478542
LD vs. LE	MSTRG.39111.1	2.7974	0.191107
LD vs. LE	MSTRG.39461.2	0.633856	0.785905
LD vs. LE	MSTRG.39497.2	-1.12516	0.778335
LD vs. LE	MSTRG.40140.3	-0.686695	0.575302
LD vs. LE	MSTRG.40388.3	1.62225	0.529532
LD vs. LE	MSTRG.40448.1	2.69785	0.499843
LD vs. LE	MSTRG.40511.1	1.45642	0.0951628
LD vs. LE	MSTRG.40566.1	2.84276	0.259119
LD vs. LE	MSTRG.40570.8	-0.390902	0.462931
LD vs. LE	MSTRG.40575.1	-1.1387	0.344835
LD vs. LE	MSTRG.40640.1	-0.18519	0.962604
LD vs. LE	MSTRG.38488.1	0.236437	0.774396
LD vs. LE	MSTRG.38833.1	0.41749	0.623381
LD vs. LE	MSTRG.39058.1	-1.59126	0.671581
LD vs. LE	MSTRG.39166.1	0.213224	0.919493
LD vs. LE	MSTRG.39568.2	-0.83131	0.410762
LD vs. LE	MSTRG.39704.2	1.05974	0.581497
LD vs. LE	MSTRG.39961.1	-1.50658	0.111936
LD vs. LE	MSTRG.40561.1	5.13528	0.190623
LD vs. LE	MSTRG.40667.2	-0.0111544	0.983778
LD vs. LE	MSTRG.40763.1	1.25475	0.75577
LD vs. LE	MSTRG.40799.1	1.27656	0.754398
LD vs. LE	MSTRG.40837.1	3.23796	0.414723
LD vs. LE	MSTRG.40997.1	-0.282795	0.706641
LD vs. LE	MSTRG.41060.1	0.820172	0.467615
LD vs. LE	MSTRG.41070.2	0.052244	0.981775
LD vs. LE	MSTRG.41212.1	-2.08255	0.602384
LD vs. LE	MSTRG.41281.1	0.199351	0.571508
LD vs. LE	MSTRG.41418.1	-0.0492124	0.969918
LD vs. LE	MSTRG.41438.1	0.261777	0.812013
LD vs. LE	MSTRG.41542.1	-1.082	0.0665081
LD vs. LE	MSTRG.41792.1	2.14119	0.596183
LD vs. LE	MSTRG.41859.3	-0.646996	0.874016
LD vs. LE	MSTRG.41859.5	-1.50382	0.709815
LD vs. LE	MSTRG.41853.1	-0.646996	0.874016
LD vs. LE	MSTRG.42188.1	-0.484543	0.473492
LD vs. LE	MSTRG.42208.1	1.72054	0.0847046
LD vs. LE	MSTRG.42227.1	1.70559	0.517976
LD vs. LE	MSTRG.42391.2	0.589305	0.304136
LD vs. LE	MSTRG.42714.1	1.28478	0.666967
LD vs. LE	MSTRG.42778.1	1.27656	0.754398
LD vs. LE	MSTRG.43515.1	2.33103	0.179248
LD vs. LE	MSTRG.42715.1	3.97291	0.25421
LD vs. LE	MSTRG.42804.1	-3.19927	0.123575
LD vs. LE	MSTRG.43366.1	4.37661	0.0777124
LD vs. LE	MSTRG.43488.2	-0.24564	0.378649
LD vs. LE	MSTRG.44118.2	0.0987842	0.861783
LD vs. LE	MSTRG.44122.6	1.27656	0.754398
LD vs. LE	MSTRG.44147.1	1.31004	0.548687
LD vs. LE	MSTRG.44147.3	0.0401723	0.979606
LD vs. MD	MSTRG.18.2	-3.69839	0.0181637
LD vs. MD	MSTRG.650.1	0.789703	0.713123
LD vs. MD	MSTRG.794.1	-1.7915	0.657717
LD vs. MD	MSTRG.795.1	-5.17531	0.186764
LD vs. MD	MSTRG.868.1	-2.44787	0.259449
LD vs. MD	MSTRG.1266.1	0.61927	0.709823
LD vs. MD	MSTRG.1581.1	0.510487	0.55811
LD vs. MD	MSTRG.1617.3	-0.493547	0.371589
LD vs. MD	MSTRG.1870.2	-3.11145	0.0173076
LD vs. MD	MSTRG.2181.1	-1.8421	0.648315
LD vs. MD	MSTRG.2633.2	-2.27172	0.0136503
LD vs. MD	MSTRG.2685.1	-0.350296	0.619085
LD vs. MD	MSTRG.2692.1	1.3551	0.036369
LD vs. MD	MSTRG.2916.1	1.24146	0.214527
LD vs. MD	MSTRG.3359.2	0.0812238	0.756068
LD vs. MD	MSTRG.3589.1	0.966688	0.81273
LD vs. MD	MSTRG.117.1	0.966688	0.81273
LD vs. MD	MSTRG.242.1	0.696044	0.302314
LD vs. MD	MSTRG.246.4	-0.956865	0.814598
LD vs. MD	MSTRG.374.1	1.03384	0.0316875
LD vs. MD	MSTRG.375.1	0.00491559	0.999039
LD vs. MD	MSTRG.590.1	1.83011	0.520702
LD vs. MD	MSTRG.1435.1	-1.26533	0.454621
LD vs. MD	MSTRG.1481.1	-0.252936	0.727729
LD vs. MD	MSTRG.1587.1	0.104776	0.802583
LD vs. MD	MSTRG.1699.1	-0.525874	0.161608
LD vs. MD	MSTRG.2174.1	-3.84483	0.0289496
LD vs. MD	MSTRG.2359.1	-1.06855	0.30876
LD vs. MD	MSTRG.2649.1	-0.951833	0.617764
LD vs. MD	MSTRG.3244.5	0.494529	0.612664
LD vs. MD	MSTRG.3564.4	0.740213	0.489658
LD vs. MD	MSTRG.3637.1	-0.244864	0.896627
LD vs. MD	MSTRG.3731.1	-0.583502	0.483377
LD vs. MD	MSTRG.3901.1	0.00491559	0.999039
LD vs. MD	MSTRG.4155.1	1.75756	0.0452823
LD vs. MD	MSTRG.4263.1	1.36875	0.527197
LD vs. MD	MSTRG.4299.1	-0.839901	0.363433
LD vs. MD	MSTRG.4391.1	0.846756	0.0757168
LD vs. MD	MSTRG.4580.1	-0.99223	0.488579
LD vs. MD	MSTRG.4896.1	0.0168893	0.967311
LD vs. MD	MSTRG.5009.11	-0.475873	0.681966
LD vs. MD	MSTRG.5233.1	-3.68767	0.295558
LD vs. MD	MSTRG.5287.1	0.966688	0.81273
LD vs. MD	MSTRG.5287.2	-1.88367	0.640625
LD vs. MD	MSTRG.4228.4	-0.275916	0.700837
LD vs. MD	MSTRG.4314.1	0.303635	0.513648
LD vs. MD	MSTRG.4377.1	-0.43026	0.725417
LD vs. MD	MSTRG.4390.1	0.61243	0.29363
LD vs. MD	MSTRG.4907.1	0.187327	0.857575
LD vs. MD	MSTRG.5085.1	0.966688	0.81273
LD vs. MD	MSTRG.5267.1	0.725758	0.435523
LD vs. MD	MSTRG.5640.1	-1.83445	0.0559648
LD vs. MD	MSTRG.5829.1	0.966688	0.81273
LD vs. MD	MSTRG.5838.1	-5.42668	0.166026
LD vs. MD	MSTRG.5487.1	0.247239	0.417291
LD vs. MD	MSTRG.5675.1	-1.28519	0.0690653
LD vs. MD	MSTRG.5677.1	-1.14827	0.198962
LD vs. MD	MSTRG.5779.1	0.282038	0.743211
LD vs. MD	MSTRG.6308.1	-4.64234	0.052838
LD vs. MD	MSTRG.6409.1	0.573378	0.288824
LD vs. MD	MSTRG.6415.1	0.966688	0.81273
LD vs. MD	MSTRG.6477.1	-1.7126	0.0960056
LD vs. MD	MSTRG.6478.1	-0.212287	0.888964
LD vs. MD	MSTRG.6515.1	0.113178	0.935483
LD vs. MD	MSTRG.7017.1	-1.00602	0.450545
LD vs. MD	MSTRG.7268.1	-0.0988593	0.789307
LD vs. MD	MSTRG.7818.1	-0.956865	0.814598
LD vs. MD	MSTRG.6482.1	0.921479	0.769573
LD vs. MD	MSTRG.6703.1	0.00491559	0.999039
LD vs. MD	MSTRG.7231.1	-1.24972	0.429452
LD vs. MD	MSTRG.7810.1	-1.51422	0.195245
LD vs. MD	MSTRG.8003.1	-3.45843	0.0214766
LD vs. MD	MSTRG.8321.1	-2.23212	0.420669
LD vs. MD	MSTRG.8351.6	-0.464496	0.0479771
LD vs. MD	MSTRG.8418.1	0.142519	0.873876
LD vs. MD	MSTRG.8949.1	0.305446	0.477404
LD vs. MD	MSTRG.9216.5	-0.0808465	0.774542
LD vs. MD	MSTRG.9355.2	-2.01621	0.086559
LD vs. MD	MSTRG.9428.1	-0.459625	0.826876
LD vs. MD	MSTRG.9477.1	0.767901	0.447319
LD vs. MD	MSTRG.9588.1	0.0526814	0.986039
LD vs. MD	MSTRG.9743.1	-1.58304	0.342762
LD vs. MD	MSTRG.10034.1	-1.53626	0.388079
LD vs. MD	MSTRG.10508.5	-0.0953415	0.9199
LD vs. MD	MSTRG.10580.1	2.79648	0.481879
LD vs. MD	MSTRG.10806.2	0.306521	0.559942
LD vs. MD	MSTRG.11114.1	-4.18148	7.30462e-05
LD vs. MD	MSTRG.8058.1	-3.69471	0.271718
LD vs. MD	MSTRG.8756.1	0.0498893	0.983577
LD vs. MD	MSTRG.9369.1	-0.864231	0.349992
LD vs. MD	MSTRG.9392.2	-0.914124	0.820808
LD vs. MD	MSTRG.9475.1	-4.49381	0.165065
LD vs. MD	MSTRG.10028.1	3.85699	0.00151018
LD vs. MD	MSTRG.10107.1	-1.89141	0.639197
LD vs. MD	MSTRG.10440.1	-0.0318629	0.97004
LD vs. MD	MSTRG.10597.1	-3.41745	0.193283
LD vs. MD	MSTRG.10909.1	-6.95222	NA
LD vs. MD	MSTRG.11133.1	1.14021	0.0165062
LD vs. MD	MSTRG.11381.1	-4.57668	0.0116631
LD vs. MD	MSTRG.11781.1	-0.423082	0.602727
LD vs. MD	MSTRG.12265.1	-0.774005	0.649419
LD vs. MD	MSTRG.12352.1	-0.0408738	0.915109
LD vs. MD	MSTRG.12447.1	-3.18116	0.013022
LD vs. MD	MSTRG.12511.1	-5.04545	0.0233992
LD vs. MD	MSTRG.12852.1	0.875146	0.828538
LD vs. MD	MSTRG.13196.1	-0.829718	0.837413
LD vs. MD	MSTRG.13554.2	-1.89141	0.639197
LD vs. MD	MSTRG.13570.1	0.00491559	0.999039
LD vs. MD	MSTRG.13579.1	1.54873	0.119672
LD vs. MD	MSTRG.13609.1	0.659945	0.794152
LD vs. MD	MSTRG.13670.1	0.126836	0.878407
LD vs. MD	MSTRG.13803.1	2.40769	0.546981
LD vs. MD	MSTRG.11883.2	-1.32475	0.0179013
LD vs. MD	MSTRG.12473.1	-2.89826	0.258685
LD vs. MD	MSTRG.13136.1	-0.914124	0.820808
LD vs. MD	MSTRG.13553.1	-0.111664	0.748007
LD vs. MD	MSTRG.13847.1	2.06733	0.607188
LD vs. MD	MSTRG.14247.1	-2.58514	0.101529
LD vs. MD	MSTRG.14299.1	0.966688	0.81273
LD vs. MD	MSTRG.14398.1	-0.101216	0.94885
LD vs. MD	MSTRG.15480.1	-4.16078	0.0499078
LD vs. MD	MSTRG.13897.2	-0.956865	0.814598
LD vs. MD	MSTRG.14120.1	0.72941	0.506268
LD vs. MD	MSTRG.14276.1	0.715079	0.192176
LD vs. MD	MSTRG.15165.2	-2.88562	0.455879
LD vs. MD	MSTRG.15233.1	-0.312856	0.687066
LD vs. MD	MSTRG.15546.1	-0.956865	0.814598
LD vs. MD	MSTRG.15715.1	-1.19076	0.441041
LD vs. MD	MSTRG.15798.5	0.93695	0.2156
LD vs. MD	MSTRG.15858.1	-1.03488	0.613937
LD vs. MD	MSTRG.15936.2	-0.0180514	0.961406
LD vs. MD	MSTRG.15949.1	0.00491559	0.999039
LD vs. MD	MSTRG.16692.1	-4.62879	0.146688
LD vs. MD	MSTRG.17053.1	-0.956865	0.814598
LD vs. MD	MSTRG.17059.3	6.83196	0.0632419
LD vs. MD	MSTRG.16042.15	0.0330871	0.989104
LD vs. MD	MSTRG.16286.1	-1.69436	0.206463
LD vs. MD	MSTRG.16674.1	0.360266	0.664056
LD vs. MD	MSTRG.16694.2	-0.697165	0.260549
LD vs. MD	MSTRG.17002.1	3.89649	0.0558368
LD vs. MD	MSTRG.17221.1	0.772049	0.547978
LD vs. MD	MSTRG.17353.1	1.83692	0.649402
LD vs. MD	MSTRG.17414.1	-0.947711	0.187541
LD vs. MD	MSTRG.17419.1	-0.956865	0.814598
LD vs. MD	MSTRG.17430.1	-1.57474	0.216827
LD vs. MD	MSTRG.17804.1	-0.832366	0.513651
LD vs. MD	MSTRG.18059.1	-1.50532	0.0552415
LD vs. MD	MSTRG.18208.1	0.764149	0.527238
LD vs. MD	MSTRG.17129.7	4.7992	4.88173e-06
LD vs. MD	MSTRG.17217.8	1.57762	0.461835
LD vs. MD	MSTRG.17475.1	-2.39158	0.129694
LD vs. MD	MSTRG.17961.1	-2.4727	0.535698
LD vs. MD	MSTRG.18030.1	-8.25529	0.00162164
LD vs. MD	MSTRG.18074.2	-0.956865	0.814598
LD vs. MD	MSTRG.18325.2	0.141446	0.87684
LD vs. MD	MSTRG.18515.1	0.630791	0.732958
LD vs. MD	MSTRG.18602.1	-0.0638419	0.858281
LD vs. MD	MSTRG.18742.1	-1.85563	0.517511
LD vs. MD	MSTRG.19011.1	-0.62819	0.704223
LD vs. MD	MSTRG.19203.1	-0.956865	0.814598
LD vs. MD	MSTRG.18290.1	-1.48188	0.358046
LD vs. MD	MSTRG.18513.4	-1.25696	0.00385243
LD vs. MD	MSTRG.18591.2	-0.19374	0.617222
LD vs. MD	MSTRG.19085.1	0.966688	0.81273
LD vs. MD	MSTRG.19408.1	7.17732	3.50778e-06
LD vs. MD	MSTRG.19403.1	2.92449	0.177465
LD vs. MD	MSTRG.19465.1	0.775374	0.268179
LD vs. MD	MSTRG.19813.1	-1.14357	0.11318
LD vs. MD	MSTRG.20176.1	-4.1709	0.000300479
LD vs. MD	MSTRG.20276.1	-0.526192	0.8855
LD vs. MD	MSTRG.20288.1	-4.69887	0.139891
LD vs. MD	MSTRG.21239.1	-0.0702026	0.888625
LD vs. MD	MSTRG.21529.1	0.00491559	0.999039
LD vs. MD	MSTRG.21786.1	0.966688	0.81273
LD vs. MD	MSTRG.21938.1	0.473699	0.23444
LD vs. MD	MSTRG.22286.1	0.457397	0.7402
LD vs. MD	MSTRG.22753.1	1.95551	0.627542
LD vs. MD	MSTRG.19447.2	-0.154224	0.771724
LD vs. MD	MSTRG.19466.4	0.246627	0.752046
LD vs. MD	MSTRG.20271.1	-1.41182	0.724026
LD vs. MD	MSTRG.20376.1	-0.440616	0.654067
LD vs. MD	MSTRG.20418.1	0.00491559	0.999039
LD vs. MD	MSTRG.20886.1	1.14676	0.124604
LD vs. MD	MSTRG.21160.1	-6.01348	1.68342e-06
LD vs. MD	MSTRG.21559.1	-0.956865	0.814598
LD vs. MD	MSTRG.21737.1	4.56957	0.0504497
LD vs. MD	MSTRG.22124.2	0.70569	0.257413
LD vs. MD	MSTRG.22311.1	0.052743	0.973313
LD vs. MD	MSTRG.22783.1	-2.74475	0.143231
LD vs. MD	MSTRG.22836.1	2.4071	0.0498124
LD vs. MD	MSTRG.22906.1	-0.2088	0.800281
LD vs. MD	MSTRG.23511.2	-1.8421	0.648315
LD vs. MD	MSTRG.23719.1	-3.15255	0.0453685
LD vs. MD	MSTRG.23866.1	-0.172131	0.797332
LD vs. MD	MSTRG.24368.1	2.36051	0.0723816
LD vs. MD	MSTRG.24394.2	-0.804766	0.314964
LD vs. MD	MSTRG.24410.1	0.446624	0.261791
LD vs. MD	MSTRG.25178.1	1.89925	0.0268254
LD vs. MD	MSTRG.25224.2	0.966688	0.81273
LD vs. MD	MSTRG.25304.1	0.802767	0.353617
LD vs. MD	MSTRG.25304.2	1.76464	0.662854
LD vs. MD	MSTRG.22827.1	0.308369	0.853122
LD vs. MD	MSTRG.22924.1	-7.29566	0.00139399
LD vs. MD	MSTRG.23643.12	-0.0579957	0.896446
LD vs. MD	MSTRG.23705.1	0.423806	0.409292
LD vs. MD	MSTRG.23924.1	0.787201	0.696656
LD vs. MD	MSTRG.23955.1	-0.232945	0.850415
LD vs. MD	MSTRG.24128.1	-0.550573	0.77452
LD vs. MD	MSTRG.24710.1	0.338814	0.559683
LD vs. MD	MSTRG.24718.1	-0.874184	0.78111
LD vs. MD	MSTRG.24927.3	0.919859	0.0472879
LD vs. MD	MSTRG.25058.1	1.76464	0.662854
LD vs. MD	MSTRG.25201.1	0.308689	0.790156
LD vs. MD	MSTRG.25205.1	-0.956865	0.814598
LD vs. MD	MSTRG.25675.1	1.19732	0.570762
LD vs. MD	MSTRG.26084.1	0.00491559	0.999039
LD vs. MD	MSTRG.26134.1	3.04613	0.0288781
LD vs. MD	MSTRG.26428.1	-0.916459	0.538457
LD vs. MD	MSTRG.27166.1	-0.124646	0.941592
LD vs. MD	MSTRG.27437.1	-1.05942	0.596771
LD vs. MD	MSTRG.27482.1	0.966688	0.81273
LD vs. MD	MSTRG.27595.1	-0.214207	0.526071
LD vs. MD	MSTRG.27665.1	-4.62923	0.0424615
LD vs. MD	MSTRG.25418.1	0.966688	0.81273
LD vs. MD	MSTRG.25553.1	-2.71728	0.0161865
LD vs. MD	MSTRG.25814.1	0.221011	0.764404
LD vs. MD	MSTRG.26092.1	0.966688	0.81273
LD vs. MD	MSTRG.26164.1	1.92286	0.362092
LD vs. MD	MSTRG.26361.1	-1.99005	0.166024
LD vs. MD	MSTRG.27389.1	0.0810871	0.973308
LD vs. MD	MSTRG.27492.1	2.00928	0.121147
LD vs. MD	MSTRG.27494.1	-0.956865	0.814598
LD vs. MD	MSTRG.27572.1	-1.00388	0.514904
LD vs. MD	MSTRG.27626.1	0.940561	0.550656
LD vs. MD	MSTRG.27711.1	-1.7915	0.657717
LD vs. MD	MSTRG.27741.1	1.76203	0.0525318
LD vs. MD	MSTRG.27746.2	1.95551	0.627542
LD vs. MD	MSTRG.28010.1	-0.956865	0.814598
LD vs. MD	MSTRG.28207.1	1.67684	0.489624
LD vs. MD	MSTRG.28724.1	1.34248	0.187197
LD vs. MD	MSTRG.28747.1	-2.8764	0.0119984
LD vs. MD	MSTRG.28752.1	-0.54607	0.22485
LD vs. MD	MSTRG.28894.1	0.31531	0.700231
LD vs. MD	MSTRG.29361.1	-1.90069	0.0832292
LD vs. MD	MSTRG.29746.1	-0.929634	0.81776
LD vs. MD	MSTRG.27816.1	2.00908	0.281591
LD vs. MD	MSTRG.28188.1	-1.62889	0.219688
LD vs. MD	MSTRG.28968.11	-1.432	0.195978
LD vs. MD	MSTRG.29466.1	-0.203072	0.83213
LD vs. MD	MSTRG.29598.1	2.29424	0.120196
LD vs. MD	MSTRG.29899.1	-2.08388	0.0634375
LD vs. MD	MSTRG.29939.1	1.57995	0.110959
LD vs. MD	MSTRG.30034.1	1.12751	0.0835868
LD vs. MD	MSTRG.30119.7	1.55245	0.379534
LD vs. MD	MSTRG.30339.1	-1.17191	0.661854
LD vs. MD	MSTRG.30793.3	-0.956865	0.814598
LD vs. MD	MSTRG.31463.3	-0.509484	0.256402
LD vs. MD	MSTRG.31551.1	-0.956865	0.814598
LD vs. MD	MSTRG.31715.1	-2.15625	0.274564
LD vs. MD	MSTRG.31847.1	-0.199051	0.797364
LD vs. MD	MSTRG.32130.1	2.16134	0.0243872
LD vs. MD	MSTRG.32263.1	-0.797751	0.181456
LD vs. MD	MSTRG.32291.1	-1.94274	0.0335725
LD vs. MD	MSTRG.32354.1	0.688665	0.352657
LD vs. MD	MSTRG.32664.2	-0.956865	0.814598
LD vs. MD	MSTRG.32887.2	-0.956865	0.814598
LD vs. MD	MSTRG.33170.1	0.966688	0.81273
LD vs. MD	MSTRG.33214.1	0.807026	0.455694
LD vs. MD	MSTRG.33418.1	0.565068	0.751171
LD vs. MD	MSTRG.29995.1	1.30251	0.068275
LD vs. MD	MSTRG.30169.2	-0.867293	0.433502
LD vs. MD	MSTRG.30350.1	0.966688	0.81273
LD vs. MD	MSTRG.31014.1	-0.956865	0.814598
LD vs. MD	MSTRG.32236.1	-0.956865	0.814598
LD vs. MD	MSTRG.32382.1	-0.956865	0.814598
LD vs. MD	MSTRG.32390.2	0.368311	0.249378
LD vs. MD	MSTRG.32811.1	-0.504142	0.676986
LD vs. MD	MSTRG.33219.1	-0.00154509	0.998946
LD vs. MD	MSTRG.33622.4	-1.16913	0.528859
LD vs. MD	MSTRG.33662.1	0.353601	0.657747
LD vs. MD	MSTRG.33671.1	0.244752	0.685424
LD vs. MD	MSTRG.33719.1	-0.28267	0.830732
LD vs. MD	MSTRG.33930.1	2.55883	0.0472148
LD vs. MD	MSTRG.34215.1	-0.861848	0.450493
LD vs. MD	MSTRG.34232.1	-0.569236	0.750537
LD vs. MD	MSTRG.34409.1	-0.508243	0.803029
LD vs. MD	MSTRG.35320.10	-2.65968	0.0799384
LD vs. MD	MSTRG.36143.1	-1.50009	0.707166
LD vs. MD	MSTRG.33655.1	-3.80227	0.0180972
LD vs. MD	MSTRG.33779.1	-5.3755	0.025721
LD vs. MD	MSTRG.33824.1	-5.48843	0.0697292
LD vs. MD	MSTRG.34944.1	-1.73588	0.522517
LD vs. MD	MSTRG.35303.1	-2.96949	0.0135113
LD vs. MD	MSTRG.35619.1	-1.50296	0.612203
LD vs. MD	MSTRG.35928.1	0.0685757	0.937269
LD vs. MD	MSTRG.36236.1	0.878383	0.487082
LD vs. MD	MSTRG.36310.1	-2.20661	0.30106
LD vs. MD	MSTRG.36372.2	-0.889849	0.227917
LD vs. MD	MSTRG.36579.1	0.848835	0.183862
LD vs. MD	MSTRG.36620.1	-0.956865	0.814598
LD vs. MD	MSTRG.36804.3	-0.403169	0.378604
LD vs. MD	MSTRG.37901.1	-1.06785	0.61779
LD vs. MD	MSTRG.37931.1	-1.88842	0.119046
LD vs. MD	MSTRG.36272.2	-0.183192	0.731964
LD vs. MD	MSTRG.36286.1	2.64673	0.0402505
LD vs. MD	MSTRG.36368.1	0.00491559	0.999039
LD vs. MD	MSTRG.36377.1	-3.76204	0.00397262
LD vs. MD	MSTRG.36410.2	1.35388	0.119089
LD vs. MD	MSTRG.36469.2	-2.45225	0.256237
LD vs. MD	MSTRG.36565.1	-0.956865	0.814598
LD vs. MD	MSTRG.36685.2	-1.89141	0.639197
LD vs. MD	MSTRG.36813.1	-0.452786	0.829337
LD vs. MD	MSTRG.36940.1	-1.16006	0.283381
LD vs. MD	MSTRG.37238.3	-0.34206	0.749635
LD vs. MD	MSTRG.37254.1	-4.78587	0.0248252
LD vs. MD	MSTRG.38068.2	0.410244	0.793141
LD vs. MD	MSTRG.38073.1	0.966688	0.81273
LD vs. MD	MSTRG.38116.1	-2.97748	0.063017
LD vs. MD	MSTRG.38814.1	0.92625	0.62569
LD vs. MD	MSTRG.38941.1	-1.02134	0.518123
LD vs. MD	MSTRG.38941.2	-2.7871	0.483301
LD vs. MD	MSTRG.39059.9	-1.14402	0.535262
LD vs. MD	MSTRG.39106.1	0.0525864	0.926616
LD vs. MD	MSTRG.39111.1	2.16798	0.436693
LD vs. MD	MSTRG.39461.2	-0.0345944	0.987494
LD vs. MD	MSTRG.39497.2	-2.46188	0.53755
LD vs. MD	MSTRG.40140.3	-1.83057	0.21217
LD vs. MD	MSTRG.40388.3	1.60661	0.363362
LD vs. MD	MSTRG.40448.1	1.83692	0.649402
LD vs. MD	MSTRG.40511.1	-0.362367	0.697488
LD vs. MD	MSTRG.40566.1	1.75575	0.506765
LD vs. MD	MSTRG.40570.8	0.0101873	0.979139
LD vs. MD	MSTRG.40575.1	-1.92366	0.112616
LD vs. MD	MSTRG.40640.1	-2.46188	0.53755
LD vs. MD	MSTRG.38488.1	0.593647	0.291902
LD vs. MD	MSTRG.38833.1	0.454169	0.345746
LD vs. MD	MSTRG.39058.1	-2.82342	0.434257
LD vs. MD	MSTRG.39166.1	-0.891085	0.582272
LD vs. MD	MSTRG.39568.2	0.0588775	0.950073
LD vs. MD	MSTRG.39704.2	0.161837	0.93034
LD vs. MD	MSTRG.39961.1	-0.410664	0.688035
LD vs. MD	MSTRG.40667.2	-0.647076	0.234778
LD vs. MD	MSTRG.40763.1	-0.956865	0.814598
LD vs. MD	MSTRG.40799.1	1.83692	0.649402
LD vs. MD	MSTRG.40837.1	1.88757	0.640032
LD vs. MD	MSTRG.40997.1	-0.230223	0.684783
LD vs. MD	MSTRG.41060.1	0.926872	0.378621
LD vs. MD	MSTRG.41070.2	3.54688	0.0666127
LD vs. MD	MSTRG.41212.1	-1.44472	0.626786
LD vs. MD	MSTRG.41281.1	-0.0148151	0.952658
LD vs. MD	MSTRG.41418.1	2.00849	0.0231666
LD vs. MD	MSTRG.41438.1	0.258304	0.715854
LD vs. MD	MSTRG.41542.1	-0.564276	0.282386
LD vs. MD	MSTRG.41792.1	3.60884	0.29261
LD vs. MD	MSTRG.41859.3	0.983826	0.752713
LD vs. MD	MSTRG.41859.5	5.05995	0.000884256
LD vs. MD	MSTRG.41853.1	1.89959	0.398739
LD vs. MD	MSTRG.42188.1	0.0994713	0.865731
LD vs. MD	MSTRG.42208.1	0.199782	0.829862
LD vs. MD	MSTRG.42227.1	3.90236	0.112312
LD vs. MD	MSTRG.42391.2	-0.104728	0.706743
LD vs. MD	MSTRG.42714.1	-1.7915	0.657717
LD vs. MD	MSTRG.43515.1	0.204393	0.945832
LD vs. MD	MSTRG.42715.1	3.25942	0.369999
LD vs. MD	MSTRG.42804.1	-1.30785	0.329911
LD vs. MD	MSTRG.43366.1	3.27332	0.220188
LD vs. MD	MSTRG.43488.2	-0.887879	0.00067151
LD vs. MD	MSTRG.44118.2	-0.495221	0.462787
LD vs. MD	MSTRG.44122.6	0.966688	0.81273
LD vs. MD	MSTRG.44147.1	2.4855	0.0868057
LD vs. MD	MSTRG.44147.3	1.68878	0.0759798
MD vs. ME	MSTRG.18.2	-1.94139	0.627296
MD vs. ME	MSTRG.650.1	-0.728614	0.734647
MD vs. ME	MSTRG.795.1	1.40908	0.729852
MD vs. ME	MSTRG.868.1	1.93078	0.401115
MD vs. ME	MSTRG.1266.1	-2.04636	0.431522
MD vs. ME	MSTRG.1581.1	-1.34118	0.259775
MD vs. ME	MSTRG.1617.3	0.268607	0.713799
MD vs. ME	MSTRG.1870.2	-1.10344	0.701407
MD vs. ME	MSTRG.2633.2	2.93099	NA
MD vs. ME	MSTRG.2685.1	0.797777	0.37699
MD vs. ME	MSTRG.2692.1	-1.97723	0.0236093
MD vs. ME	MSTRG.2916.1	0.627932	0.568206
MD vs. ME	MSTRG.3359.2	0.891297	0.0175359
MD vs. ME	MSTRG.3589.1	-0.514473	0.899667
MD vs. ME	MSTRG.117.1	-0.514473	0.899667
MD vs. ME	MSTRG.242.1	-1.46176	0.0573829
MD vs. ME	MSTRG.374.1	0.460623	0.289303
MD vs. ME	MSTRG.375.1	-0.514473	0.899667
MD vs. ME	MSTRG.590.1	0.505296	0.808844
MD vs. ME	MSTRG.1435.1	0.477004	0.743006
MD vs. ME	MSTRG.1449.1	1.40908	0.729852
MD vs. ME	MSTRG.1481.1	-0.836392	0.372528
MD vs. ME	MSTRG.1587.1	0.778478	0.0499043
MD vs. ME	MSTRG.1699.1	0.289056	0.588191
MD vs. ME	MSTRG.2174.1	2.31005	0.181234
MD vs. ME	MSTRG.2359.1	-1.69219	0.292492
MD vs. ME	MSTRG.2649.1	2.10765	0.30406
MD vs. ME	MSTRG.3244.5	2.4479	NA
MD vs. ME	MSTRG.3564.4	1.06719	0.00416992
MD vs. ME	MSTRG.3637.1	-3.72393	0.246083
MD vs. ME	MSTRG.3731.1	0.129037	0.854481
MD vs. ME	MSTRG.3901.1	-0.514473	0.899667
MD vs. ME	MSTRG.4155.1	-3.11398	0.00227459
MD vs. ME	MSTRG.4222.1	1.40908	0.729852
MD vs. ME	MSTRG.4263.1	-1.85023	0.486393
MD vs. ME	MSTRG.4299.1	0.0786363	0.932164
MD vs. ME	MSTRG.4391.1	0.448275	0.609048
MD vs. ME	MSTRG.4580.1	-0.329961	0.876154
MD vs. ME	MSTRG.4896.1	0.614441	0.257176
MD vs. ME	MSTRG.5009.11	-0.612653	0.628773
MD vs. ME	MSTRG.5233.1	2.35504	0.559336
MD vs. ME	MSTRG.5287.1	-0.514473	0.899667
MD vs. ME	MSTRG.5287.2	1.40908	0.729852
MD vs. ME	MSTRG.4228.4	0.522214	0.653586
MD vs. ME	MSTRG.4314.1	1.2205	0.0254159
MD vs. ME	MSTRG.4377.1	1.53686	0.21155
MD vs. ME	MSTRG.4390.1	1.25462	0.0894361
MD vs. ME	MSTRG.4907.1	1.33241	0.226491
MD vs. ME	MSTRG.5085.1	-0.514473	0.899667
MD vs. ME	MSTRG.5267.1	-0.74027	0.398838
MD vs. ME	MSTRG.5640.1	-0.559829	0.690054
MD vs. ME	MSTRG.5829.1	-0.514473	0.899667
MD vs. ME	MSTRG.5487.1	-0.609088	0.0495632
MD vs. ME	MSTRG.5675.1	-0.43549	0.54224
MD vs. ME	MSTRG.5677.1	0.787885	0.414143
MD vs. ME	MSTRG.5779.1	-0.132867	0.914349
MD vs. ME	MSTRG.6308.1	0.447307	0.91271
MD vs. ME	MSTRG.6409.1	1.17601	0.263555
MD vs. ME	MSTRG.6415.1	0.447307	0.91271
MD vs. ME	MSTRG.6477.1	0.484373	0.710248
MD vs. ME	MSTRG.6478.1	2.08733	0.175672
MD vs. ME	MSTRG.6515.1	-0.653347	0.649627
MD vs. ME	MSTRG.7017.1	1.84805	0.211285
MD vs. ME	MSTRG.7268.1	0.203748	0.612639
MD vs. ME	MSTRG.7414.1	1.40908	0.729852
MD vs. ME	MSTRG.7818.1	3.48715	0.37917
MD vs. ME	MSTRG.6482.1	0.370597	0.899392
MD vs. ME	MSTRG.6703.1	1.26436	0.754631
MD vs. ME	MSTRG.7231.1	0.565471	0.793355
MD vs. ME	MSTRG.7810.1	1.36445	0.276834
MD vs. ME	MSTRG.8003.1	-0.400374	0.844311
MD vs. ME	MSTRG.8321.1	1.8495	0.508922
MD vs. ME	MSTRG.8351.6	0.408216	0.328671
MD vs. ME	MSTRG.8418.1	-1.36898	0.223294
MD vs. ME	MSTRG.8949.1	0.950908	0.00323646
MD vs. ME	MSTRG.9216.5	-0.455885	0.139392
MD vs. ME	MSTRG.9355.2	0.462941	0.778244
MD vs. ME	MSTRG.9428.1	0.899315	0.670297
MD vs. ME	MSTRG.9477.1	-0.744556	0.552996
MD vs. ME	MSTRG.9588.1	-1.51018	0.707846
MD vs. ME	MSTRG.9743.1	2.77296	0.163721
MD vs. ME	MSTRG.10034.1	0.315248	0.89434
MD vs. ME	MSTRG.10508.5	2.85625	0.0527797
MD vs. ME	MSTRG.10580.1	-2.36152	0.5525
MD vs. ME	MSTRG.10806.2	-0.204293	0.697971
MD vs. ME	MSTRG.11114.1	1.47539	0.218435
MD vs. ME	MSTRG.8756.1	-1.51018	0.707846
MD vs. ME	MSTRG.9369.1	0.892374	0.480631
MD vs. ME	MSTRG.9392.2	0.447307	0.91271
MD vs. ME	MSTRG.9497.1	1.40908	0.729852
MD vs. ME	MSTRG.10028.1	-3.12518	0.00917039
MD vs. ME	MSTRG.10107.1	2.35052	0.560127
MD vs. ME	MSTRG.10440.1	0.0026504	0.997432
MD vs. ME	MSTRG.10597.1	0.447307	0.91271
MD vs. ME	MSTRG.11133.1	0.2807	0.561552
MD vs. ME	MSTRG.11381.1	-1.60516	0.689832
MD vs. ME	MSTRG.11781.1	0.791659	0.392813
MD vs. ME	MSTRG.12265.1	-2.81716	0.294597
MD vs. ME	MSTRG.12352.1	-0.055429	0.898635
MD vs. ME	MSTRG.12447.1	-1.47297	0.456919
MD vs. ME	MSTRG.12511.1	4.56663	0.0430251
MD vs. ME	MSTRG.12852.1	-1.41037	0.726916
MD vs. ME	MSTRG.13196.1	-0.514473	0.899667
MD vs. ME	MSTRG.13570.1	-0.514473	0.899667
MD vs. ME	MSTRG.13579.1	-0.2579	0.759683
MD vs. ME	MSTRG.13609.1	-0.262308	0.916256
MD vs. ME	MSTRG.13670.1	-1.66366	0.110924
MD vs. ME	MSTRG.13803.1	1.85439	0.278041
MD vs. ME	MSTRG.11883.2	2.05374	5.39356e-08
MD vs. ME	MSTRG.12473.1	0.819042	0.824841
MD vs. ME	MSTRG.13136.1	-0.514473	0.899667
MD vs. ME	MSTRG.13553.1	0.564487	0.126338
MD vs. ME	MSTRG.13847.1	0.203355	0.944754
MD vs. ME	MSTRG.14247.1	1.1354	0.583043
MD vs. ME	MSTRG.14299.1	2.52296	0.489713
MD vs. ME	MSTRG.14398.1	-0.642822	0.761326
MD vs. ME	MSTRG.15480.1	3.53882	0.301985
MD vs. ME	MSTRG.13897.2	6.85571	0.063352
MD vs. ME	MSTRG.14120.1	-0.0432933	0.966916
MD vs. ME	MSTRG.14276.1	0.327532	0.464247
MD vs. ME	MSTRG.15165.2	4.22289	0.181671
MD vs. ME	MSTRG.15233.1	0.306842	0.705025
MD vs. ME	MSTRG.15715.1	4.18987	0.0251018
MD vs. ME	MSTRG.15798.5	-0.459746	0.660683
MD vs. ME	MSTRG.15858.1	1.34373	0.524794
MD vs. ME	MSTRG.15936.2	-0.1763	0.644333
MD vs. ME	MSTRG.15949.1	0.447307	0.91271
MD vs. ME	MSTRG.16692.1	-0.514473	0.899667
MD vs. ME	MSTRG.17059.3	-6.40908	0.0872252
MD vs. ME	MSTRG.16042.15	-1.42285	0.724525
MD vs. ME	MSTRG.16286.1	1.31471	0.608396
MD vs. ME	MSTRG.16674.1	-0.207335	0.835291
MD vs. ME	MSTRG.16694.2	0.544708	0.611203
MD vs. ME	MSTRG.17002.1	-3.46348	0.0905369
MD vs. ME	MSTRG.17221.1	0.177195	0.851472
MD vs. ME	MSTRG.17353.1	-1.41037	0.726916
MD vs. ME	MSTRG.17414.1	0.284315	0.716904
MD vs. ME	MSTRG.17430.1	-4.17066	0.030938
MD vs. ME	MSTRG.17804.1	-0.542152	0.529839
MD vs. ME	MSTRG.18059.1	-0.104691	0.929749
MD vs. ME	MSTRG.18208.1	0.0506595	0.968196
MD vs. ME	MSTRG.17129.7	-0.575976	0.592079
MD vs. ME	MSTRG.17217.8	2.76604	0.0766408
MD vs. ME	MSTRG.17475.1	1.94124	0.261684
MD vs. ME	MSTRG.18030.1	2.35504	0.559336
MD vs. ME	MSTRG.18250.1	1.40908	0.729852
MD vs. ME	MSTRG.18325.2	0.29774	0.732965
MD vs. ME	MSTRG.18515.1	-1.70272	0.044968
MD vs. ME	MSTRG.18602.1	0.397537	0.356049
MD vs. ME	MSTRG.18750.1	1.40908	0.729852
MD vs. ME	MSTRG.18742.1	-0.514473	0.899667
MD vs. ME	MSTRG.19011.1	-2.36152	0.5525
MD vs. ME	MSTRG.18290.1	-1.86581	0.641168
MD vs. ME	MSTRG.18513.4	0.275551	0.623525
MD vs. ME	MSTRG.18591.2	-0.13026	0.809197
MD vs. ME	MSTRG.19085.1	2.39069	0.365591
MD vs. ME	MSTRG.19408.1	0.0923104	0.915708
MD vs. ME	MSTRG.19403.1	-4.36226	0.0915502
MD vs. ME	MSTRG.19465.1	-1.08044	0.164257
MD vs. ME	MSTRG.19813.1	-0.6144	0.480591
MD vs. ME	MSTRG.20176.1	-0.302214	0.849951
MD vs. ME	MSTRG.20276.1	0.618777	0.816553
MD vs. ME	MSTRG.21239.1	0.202304	0.693544
MD vs. ME	MSTRG.21529.1	-0.514473	0.899667
MD vs. ME	MSTRG.21786.1	-0.514473	0.899667
MD vs. ME	MSTRG.21938.1	0.0350959	0.945068
MD vs. ME	MSTRG.22286.1	-0.329643	0.799356
MD vs. ME	MSTRG.22753.1	-1.51018	0.707846
MD vs. ME	MSTRG.19447.2	0.303204	0.608908
MD vs. ME	MSTRG.19466.4	-1.28293	0.202728
MD vs. ME	MSTRG.20271.1	1.27027	0.67406
MD vs. ME	MSTRG.20376.1	-1.28612	0.386551
MD vs. ME	MSTRG.20418.1	-0.514473	0.899667
MD vs. ME	MSTRG.20886.1	-0.929521	0.525425
MD vs. ME	MSTRG.21160.1	2.047	0.549112
MD vs. ME	MSTRG.21737.1	-0.866034	0.643577
MD vs. ME	MSTRG.22124.2	-0.284047	0.721053
MD vs. ME	MSTRG.22311.1	-3.25068	0.184647
MD vs. ME	MSTRG.22783.1	-0.457658	0.882406
MD vs. ME	MSTRG.22836.1	-1.4473	0.305892
MD vs. ME	MSTRG.22906.1	-0.409388	0.683337
MD vs. ME	MSTRG.23511.2	1.40908	0.729852
MD vs. ME	MSTRG.23719.1	-1.35913	0.6226
MD vs. ME	MSTRG.23866.1	0.0964094	0.907393
MD vs. ME	MSTRG.24368.1	-0.796908	0.549276
MD vs. ME	MSTRG.24394.2	0.601653	0.514384
MD vs. ME	MSTRG.24410.1	-0.682524	0.273237
MD vs. ME	MSTRG.24587.2	1.40908	0.729852
MD vs. ME	MSTRG.25178.1	0.050724	0.968698
MD vs. ME	MSTRG.25224.2	0.447307	0.91271
MD vs. ME	MSTRG.25304.1	0.448653	0.547664
MD vs. ME	MSTRG.25304.2	-1.31833	0.74461
MD vs. ME	MSTRG.22827.1	-0.513754	0.784047
MD vs. ME	MSTRG.23643.12	0.0293951	0.958558
MD vs. ME	MSTRG.23705.1	-0.66523	0.389093
MD vs. ME	MSTRG.23924.1	2.84177	0.0760537
MD vs. ME	MSTRG.23955.1	0.302785	0.846941
MD vs. ME	MSTRG.24128.1	0.730144	0.694909
MD vs. ME	MSTRG.24710.1	-1.28765	0.0070925
MD vs. ME	MSTRG.24718.1	-0.514473	0.899667
MD vs. ME	MSTRG.24927.3	0.765243	0.193083
MD vs. ME	MSTRG.25058.1	-1.31833	0.74461
MD vs. ME	MSTRG.25201.1	1.59633	0.360235
MD vs. ME	MSTRG.25675.1	-1.42398	0.499068
MD vs. ME	MSTRG.26049.1	3.22023	0.418108
MD vs. ME	MSTRG.26084.1	-0.514473	0.899667
MD vs. ME	MSTRG.26134.1	-0.0368385	0.977313
MD vs. ME	MSTRG.26428.1	1.49911	0.385934
MD vs. ME	MSTRG.27166.1	-2.20453	0.186824
MD vs. ME	MSTRG.27437.1	1.17073	0.471689
MD vs. ME	MSTRG.27482.1	-0.514473	0.899667
MD vs. ME	MSTRG.27595.1	0.0868815	0.770229
MD vs. ME	MSTRG.27665.1	2.43115	0.212291
MD vs. ME	MSTRG.25418.1	-0.514473	0.899667
MD vs. ME	MSTRG.25553.1	0.610763	0.587726
MD vs. ME	MSTRG.25814.1	-1.17079	0.156451
MD vs. ME	MSTRG.26092.1	1.92937	0.492734
MD vs. ME	MSTRG.26164.1	-1.47551	0.482803
MD vs. ME	MSTRG.26361.1	0.928902	0.557286
MD vs. ME	MSTRG.27389.1	-1.51018	0.707846
MD vs. ME	MSTRG.27492.1	2.49968	0.100814
MD vs. ME	MSTRG.27494.1	2.22131	0.582987
MD vs. ME	MSTRG.27572.1	-2.70137	0.301433
MD vs. ME	MSTRG.27626.1	0.58561	0.687827
MD vs. ME	MSTRG.27741.1	-0.946133	0.484253
MD vs. ME	MSTRG.27746.2	-0.53645	0.859618
MD vs. ME	MSTRG.28207.1	-4.43445	0.127444
MD vs. ME	MSTRG.28724.1	0.615827	0.507608
MD vs. ME	MSTRG.28747.1	-1.27121	0.598244
MD vs. ME	MSTRG.28752.1	1.05414	0.106549
MD vs. ME	MSTRG.28894.1	0.153353	0.841704
MD vs. ME	MSTRG.29361.1	-1.44313	0.155739
MD vs. ME	MSTRG.29746.1	-0.514473	0.899667
MD vs. ME	MSTRG.27816.1	-3.4418	0.123788
MD vs. ME	MSTRG.28188.1	-0.589714	0.696684
MD vs. ME	MSTRG.28603.1	1.40908	0.729852
MD vs. ME	MSTRG.28968.11	-0.553109	0.702167
MD vs. ME	MSTRG.29466.1	-3.00765	0.0048199
MD vs. ME	MSTRG.29598.1	-0.160927	0.912869
MD vs. ME	MSTRG.29899.1	-2.73726	0.309711
MD vs. ME	MSTRG.29939.1	-0.809664	0.449252
MD vs. ME	MSTRG.30034.1	0.338444	0.695087
MD vs. ME	MSTRG.30119.7	-1.98188	0.333369
MD vs. ME	MSTRG.30339.1	2.08115	0.313755
MD vs. ME	MSTRG.30793.3	1.40908	0.729852
MD vs. ME	MSTRG.31463.3	0.44308	0.386249
MD vs. ME	MSTRG.31715.1	-1.88931	0.481047
MD vs. ME	MSTRG.31847.1	-0.356491	0.673569
MD vs. ME	MSTRG.32130.1	-0.133058	0.845479
MD vs. ME	MSTRG.32263.1	0.804384	0.242864
MD vs. ME	MSTRG.32291.1	0.572935	0.626125
MD vs. ME	MSTRG.32315.1	1.40908	0.729852
MD vs. ME	MSTRG.32354.1	-0.388485	0.670554
MD vs. ME	MSTRG.32887.2	1.40908	0.729852
MD vs. ME	MSTRG.33170.1	-0.514473	0.899667
MD vs. ME	MSTRG.33214.1	-0.237991	0.850795
MD vs. ME	MSTRG.33418.1	0.469455	0.72769
MD vs. ME	MSTRG.29995.1	-2.61307	0.000355393
MD vs. ME	MSTRG.30169.2	1.32751	0.273947
MD vs. ME	MSTRG.30350.1	-0.514473	0.899667
MD vs. ME	MSTRG.31014.1	2.21647	0.58385
MD vs. ME	MSTRG.32236.1	1.40908	0.729852
MD vs. ME	MSTRG.32390.2	0.18906	0.595242
MD vs. ME	MSTRG.32811.1	-0.799529	0.630509
MD vs. ME	MSTRG.33219.1	-1.40698	0.370096
MD vs. ME	MSTRG.33622.4	0.794457	0.662264
MD vs. ME	MSTRG.33662.1	1.05097	0.32739
MD vs. ME	MSTRG.33671.1	-0.41188	0.574543
MD vs. ME	MSTRG.33719.1	-1.74202	0.41056
MD vs. ME	MSTRG.33769.1	4.81639	0.220388
MD vs. ME	MSTRG.33930.1	-0.472646	0.728193
MD vs. ME	MSTRG.34215.1	-0.110224	0.942587
MD vs. ME	MSTRG.34232.1	0.652779	0.70068
MD vs. ME	MSTRG.34409.1	3.39194	0.190776
MD vs. ME	MSTRG.35320.10	0.949454	0.619637
MD vs. ME	MSTRG.36143.1	-0.514473	0.899667
MD vs. ME	MSTRG.33655.1	-0.131338	0.946431
MD vs. ME	MSTRG.33779.1	0.955563	0.730561
MD vs. ME	MSTRG.34944.1	-0.259929	0.948909
MD vs. ME	MSTRG.35303.1	-0.637914	0.811805
MD vs. ME	MSTRG.35619.1	-0.514473	0.899667
MD vs. ME	MSTRG.35928.1	0.0751438	0.927541
MD vs. ME	MSTRG.36236.1	0.123932	0.894754
MD vs. ME	MSTRG.36310.1	-0.514473	0.899667
MD vs. ME	MSTRG.36372.2	0.249766	0.83851
MD vs. ME	MSTRG.36579.1	-0.311361	0.780523
MD vs. ME	MSTRG.36804.3	0.211118	0.733547
MD vs. ME	MSTRG.37901.1	-1.23654	0.756254
MD vs. ME	MSTRG.37931.1	-1.78853	0.455065
MD vs. ME	MSTRG.36272.2	-0.00619078	0.988619
MD vs. ME	MSTRG.36286.1	0.0477539	0.965581
MD vs. ME	MSTRG.36368.1	-0.514473	0.899667
MD vs. ME	MSTRG.36377.1	2.44328	0.142437
MD vs. ME	MSTRG.36410.2	-3.26038	0.000779413
MD vs. ME	MSTRG.36469.2	-1.66425	0.545727
MD vs. ME	MSTRG.36813.1	0.888952	0.613954
MD vs. ME	MSTRG.36940.1	-0.754742	0.540005
MD vs. ME	MSTRG.37238.3	0.991524	0.300888
MD vs. ME	MSTRG.37254.1	5.5508	0.052835
MD vs. ME	MSTRG.38068.2	0.337302	0.826834
MD vs. ME	MSTRG.38073.1	2.10522	0.584265
MD vs. ME	MSTRG.38116.1	-2.76675	0.108621
MD vs. ME	MSTRG.38814.1	-0.225824	0.877876
MD vs. ME	MSTRG.38941.1	-2.45585	0.195016
MD vs. ME	MSTRG.38941.2	1.40908	0.729852
MD vs. ME	MSTRG.39059.9	0.678825	0.794221
MD vs. ME	MSTRG.39106.1	1.01069	0.0361739
MD vs. ME	MSTRG.39111.1	0.596588	0.776949
MD vs. ME	MSTRG.39461.2	-0.983292	0.732842
MD vs. ME	MSTRG.40140.3	-2.30535	0.389002
MD vs. ME	MSTRG.40388.3	-1.57551	0.278952
MD vs. ME	MSTRG.40448.1	-1.41037	0.726916
MD vs. ME	MSTRG.40511.1	-1.69622	0.115267
MD vs. ME	MSTRG.40566.1	2.37262	0.212805
MD vs. ME	MSTRG.40570.8	0.455006	0.196793
MD vs. ME	MSTRG.40575.1	1.45042	0.272572
MD vs. ME	MSTRG.40589.1	1.40908	0.729852
MD vs. ME	MSTRG.40640.1	2.47597	0.538329
MD vs. ME	MSTRG.38488.1	-0.04168	0.948438
MD vs. ME	MSTRG.38833.1	0.13152	0.843505
MD vs. ME	MSTRG.39058.1	2.10522	0.584265
MD vs. ME	MSTRG.39166.1	-0.229709	0.89509
MD vs. ME	MSTRG.39568.2	-0.386707	0.72085
MD vs. ME	MSTRG.39704.2	1.4995	0.302016
MD vs. ME	MSTRG.39961.1	-4.29492	0.0223113
MD vs. ME	MSTRG.40667.2	0.115645	0.898441
MD vs. ME	MSTRG.40763.1	1.40908	0.729852
MD vs. ME	MSTRG.40799.1	-0.448585	0.911555
MD vs. ME	MSTRG.40837.1	2.55351	0.21737
MD vs. ME	MSTRG.40997.1	-0.392945	0.619515
MD vs. ME	MSTRG.41060.1	0.2212	0.835446
MD vs. ME	MSTRG.41070.2	-5.32651	0.0177561
MD vs. ME	MSTRG.41212.1	-0.514473	0.899667
MD vs. ME	MSTRG.41281.1	0.797311	0.0505269
MD vs. ME	MSTRG.41418.1	-0.5341	0.571969
MD vs. ME	MSTRG.41438.1	-0.400449	0.622567
MD vs. ME	MSTRG.41482.3	1.40908	0.729852
MD vs. ME	MSTRG.41542.1	-0.203717	0.853649
MD vs. ME	MSTRG.41792.1	-0.193751	0.923204
MD vs. ME	MSTRG.41859.3	-1.51018	0.707846
MD vs. ME	MSTRG.41859.5	-2.67852	0.0986925
MD vs. ME	MSTRG.41853.1	-0.530332	0.778382
MD vs. ME	MSTRG.42188.1	-0.583074	0.515548
MD vs. ME	MSTRG.42208.1	1.39229	0.256615
MD vs. ME	MSTRG.42227.1	-1.48352	0.404806
MD vs. ME	MSTRG.42391.2	1.15046	0.16849
MD vs. ME	MSTRG.43515.1	-1.60516	0.689832
MD vs. ME	MSTRG.42715.1	1.75528	0.17063
MD vs. ME	MSTRG.42804.1	-0.173188	0.921098
MD vs. ME	MSTRG.43366.1	3.75562	0.0528917
MD vs. ME	MSTRG.43488.2	0.460943	0.106596
MD vs. ME	MSTRG.44118.2	0.243818	0.72787
MD vs. ME	MSTRG.44122.6	-0.514473	0.899667
MD vs. ME	MSTRG.44147.1	-0.164235	0.871205
MD vs. ME	MSTRG.44147.3	-0.156989	0.781326
LE vs. ME	MSTRG.650.1	-0.689974	0.708761
LE vs. ME	MSTRG.795.1	-0.592022	0.88369
LE vs. ME	MSTRG.868.1	0.135379	0.955742
LE vs. ME	MSTRG.1266.1	-2.44267	0.292397
LE vs. ME	MSTRG.1581.1	-0.944313	0.489071
LE vs. ME	MSTRG.1617.3	0.127328	0.87278
LE vs. ME	MSTRG.1870.2	-3.37774	0.0717597
LE vs. ME	MSTRG.2181.1	-0.754435	0.853316
LE vs. ME	MSTRG.2633.2	1.17608	NA
LE vs. ME	MSTRG.2685.1	-0.34623	0.705506
LE vs. ME	MSTRG.2692.1	-0.688676	0.574418
LE vs. ME	MSTRG.2916.1	0.412479	0.677163
LE vs. ME	MSTRG.3359.2	0.387465	0.449983
LE vs. ME	MSTRG.3589.1	-1.60884	0.690585
LE vs. ME	MSTRG.242.1	-0.0793644	0.939861
LE vs. ME	MSTRG.246.4	-0.754435	0.853316
LE vs. ME	MSTRG.374.1	1.29996	0.0666949
LE vs. ME	MSTRG.375.1	-2.57662	0.516992
LE vs. ME	MSTRG.590.1	-1.11913	0.500362
LE vs. ME	MSTRG.1435.1	3.37379	0.232591
LE vs. ME	MSTRG.1449.1	1.16912	0.774483
LE vs. ME	MSTRG.1481.1	-1.555	0.158979
LE vs. ME	MSTRG.1587.1	0.125754	0.772739
LE vs. ME	MSTRG.1699.1	0.0407914	0.945458
LE vs. ME	MSTRG.2174.1	0.800474	0.650483
LE vs. ME	MSTRG.2359.1	-1.5505	0.402006
LE vs. ME	MSTRG.2649.1	-2.88345	0.0797038
LE vs. ME	MSTRG.3244.5	0.603271	NA
LE vs. ME	MSTRG.3564.4	0.201712	0.81795
LE vs. ME	MSTRG.3637.1	-6.53742	0.00142317
LE vs. ME	MSTRG.3731.1	-0.945127	0.155949
LE vs. ME	MSTRG.4155.1	-0.921734	0.459304
LE vs. ME	MSTRG.4222.1	0.207345	0.959474
LE vs. ME	MSTRG.4263.1	-1.97537	0.409307
LE vs. ME	MSTRG.4299.1	0.900316	0.386084
LE vs. ME	MSTRG.4391.1	1.0481	0.309524
LE vs. ME	MSTRG.4580.1	-1.3836	0.461511
LE vs. ME	MSTRG.4896.1	0.590873	0.371882
LE vs. ME	MSTRG.5009.11	-1.38766	0.300104
LE vs. ME	MSTRG.5233.1	-1.07614	0.644185
LE vs. ME	MSTRG.5287.2	-0.649367	0.85112
LE vs. ME	MSTRG.4228.4	0.250889	0.839291
LE vs. ME	MSTRG.4314.1	0.718078	0.435829
LE vs. ME	MSTRG.4377.1	0.166779	0.882405
LE vs. ME	MSTRG.4390.1	1.3217	0.138321
LE vs. ME	MSTRG.4907.1	0.630885	0.636122
LE vs. ME	MSTRG.5267.1	1.5433	0.29279
LE vs. ME	MSTRG.5640.1	-1.38962	0.310369
LE vs. ME	MSTRG.5838.1	-3.83339	0.330095
LE vs. ME	MSTRG.5487.1	-0.00498317	0.99139
LE vs. ME	MSTRG.5675.1	-2.63665	0.000994449
LE vs. ME	MSTRG.5677.1	-1.80078	0.0640124
LE vs. ME	MSTRG.5779.1	1.14457	0.454764
LE vs. ME	MSTRG.6308.1	1.16912	0.774483
LE vs. ME	MSTRG.6409.1	0.326206	0.786519
LE vs. ME	MSTRG.6415.1	-1.58524	0.686218
LE vs. ME	MSTRG.6477.1	0.335249	0.824078
LE vs. ME	MSTRG.6478.1	0.628503	0.7084
LE vs. ME	MSTRG.6515.1	0.0745648	0.963993
LE vs. ME	MSTRG.7017.1	-0.213479	0.890739
LE vs. ME	MSTRG.7268.1	0.445458	0.443801
LE vs. ME	MSTRG.7414.1	1.16912	0.774483
LE vs. ME	MSTRG.7818.1	-1.20148	0.707501
LE vs. ME	MSTRG.6482.1	-1.36282	0.551842
LE vs. ME	MSTRG.6703.1	0.153781	0.969317
LE vs. ME	MSTRG.7231.1	-3.80926	0.00816264
LE vs. ME	MSTRG.7435.1	-0.754435	0.853316
LE vs. ME	MSTRG.7810.1	0.0902901	0.944392
LE vs. ME	MSTRG.8003.1	-0.560125	0.807421
LE vs. ME	MSTRG.8321.1	-1.68906	0.328709
LE vs. ME	MSTRG.8351.6	0.457476	0.392199
LE vs. ME	MSTRG.8418.1	-2.20298	0.0886961
LE vs. ME	MSTRG.8949.1	0.345521	0.426461
LE vs. ME	MSTRG.9216.5	-0.28498	0.498091
LE vs. ME	MSTRG.9355.2	-0.169317	0.933937
LE vs. ME	MSTRG.9428.1	1.22485	0.613514
LE vs. ME	MSTRG.9477.1	-0.679684	0.785055
LE vs. ME	MSTRG.9743.1	0.0962439	0.944527
LE vs. ME	MSTRG.10034.1	0.171461	0.948949
LE vs. ME	MSTRG.10508.5	-1.48313	0.330625
LE vs. ME	MSTRG.10580.1	-2.24779	0.573572
LE vs. ME	MSTRG.10806.2	-0.0851159	0.904348
LE vs. ME	MSTRG.11114.1	-1.51643	0.213607
LE vs. ME	MSTRG.8756.1	-2.60593	0.512088
LE vs. ME	MSTRG.9369.1	0.995438	0.559969
LE vs. ME	MSTRG.9392.2	0.207345	0.959474
LE vs. ME	MSTRG.9497.1	-0.700581	0.862222
LE vs. ME	MSTRG.10028.1	2.37948	0.315204
LE vs. ME	MSTRG.10107.1	-1.25209	0.665765
LE vs. ME	MSTRG.10440.1	-1.10016	0.313805
LE vs. ME	MSTRG.10597.1	0.207345	0.959474
LE vs. ME	MSTRG.10909.1	-0.754435	0.853316
LE vs. ME	MSTRG.11133.1	1.46749	0.0431756
LE vs. ME	MSTRG.11781.1	0.160049	0.882133
LE vs. ME	MSTRG.12265.1	-1.60884	0.690585
LE vs. ME	MSTRG.12352.1	0.0783251	0.895138
LE vs. ME	MSTRG.12447.1	0.0899681	0.977824
LE vs. ME	MSTRG.12511.1	-1.48587	0.248945
LE vs. ME	MSTRG.13579.1	1.7782	0.121318
LE vs. ME	MSTRG.13609.1	4.14645	0.179214
LE vs. ME	MSTRG.13670.1	-3.45363	0.0144495
LE vs. ME	MSTRG.13803.1	-1.3514	0.531266
LE vs. ME	MSTRG.11883.2	0.0550139	0.914425
LE vs. ME	MSTRG.12473.1	-1.0913	0.743986
LE vs. ME	MSTRG.13136.1	-1.64717	0.683349
LE vs. ME	MSTRG.13553.1	0.123017	0.794986
LE vs. ME	MSTRG.13847.1	-0.469179	0.852718
LE vs. ME	MSTRG.14247.1	-1.73423	0.260141
LE vs. ME	MSTRG.14299.1	3.25393	0.41184
LE vs. ME	MSTRG.14398.1	-0.132958	0.954543
LE vs. ME	MSTRG.15480.1	-0.391641	0.845408
LE vs. ME	MSTRG.15746.1	-0.754435	0.853316
LE vs. ME	MSTRG.13897.2	1.77098	0.484479
LE vs. ME	MSTRG.14120.1	0.874135	0.508598
LE vs. ME	MSTRG.14276.1	0.692018	0.280869
LE vs. ME	MSTRG.15165.2	2.21627	0.395252
LE vs. ME	MSTRG.15233.1	-0.211425	0.810485
LE vs. ME	MSTRG.15546.1	-0.754435	0.853316
LE vs. ME	MSTRG.15715.1	0.290975	0.858424
LE vs. ME	MSTRG.15798.5	0.888638	0.496856
LE vs. ME	MSTRG.15858.1	-1.07391	0.598435
LE vs. ME	MSTRG.15936.2	0.539689	0.389447
LE vs. ME	MSTRG.15949.1	-1.58524	0.686218
LE vs. ME	MSTRG.16692.1	-1.66236	0.680488
LE vs. ME	MSTRG.17053.1	-0.754435	0.853316
LE vs. ME	MSTRG.17059.3	-4.83354	0.202886
LE vs. ME	MSTRG.16042.15	-0.754435	0.853316
LE vs. ME	MSTRG.16286.1	-0.469947	0.819795
LE vs. ME	MSTRG.16674.1	0.585315	0.636526
LE vs. ME	MSTRG.16694.2	0.138882	0.904604
LE vs. ME	MSTRG.17002.1	0.207345	0.959474
LE vs. ME	MSTRG.17221.1	0.0155609	0.989016
LE vs. ME	MSTRG.17353.1	-5.75114	0.0954748
LE vs. ME	MSTRG.17414.1	-0.291215	0.744834
LE vs. ME	MSTRG.17430.1	-2.24779	0.573572
LE vs. ME	MSTRG.17804.1	1.5025	0.183786
LE vs. ME	MSTRG.18059.1	-0.100166	0.937349
LE vs. ME	MSTRG.18208.1	-1.22462	0.324402
LE vs. ME	MSTRG.17129.7	2.5495	0.0299327
LE vs. ME	MSTRG.17217.8	2.70934	0.0319636
LE vs. ME	MSTRG.17409.1	-0.754435	0.853316
LE vs. ME	MSTRG.17475.1	0.721025	0.651389
LE vs. ME	MSTRG.17777.1	-0.754435	0.853316
LE vs. ME	MSTRG.17961.1	-2.24779	0.573572
LE vs. ME	MSTRG.18030.1	-0.219311	0.943443
LE vs. ME	MSTRG.18250.1	1.16912	0.774483
LE vs. ME	MSTRG.18325.2	1.55815	0.0913363
LE vs. ME	MSTRG.18515.1	3.21917	0.12148
LE vs. ME	MSTRG.18602.1	0.263203	0.597512
LE vs. ME	MSTRG.18750.1	1.16912	0.774483
LE vs. ME	MSTRG.18742.1	-3.68437	0.15144
LE vs. ME	MSTRG.19011.1	-5.80262	0.0200019
LE vs. ME	MSTRG.18290.1	-2.99368	0.29568
LE vs. ME	MSTRG.18513.4	-0.988267	0.124864
LE vs. ME	MSTRG.18591.2	0.161249	0.793908
LE vs. ME	MSTRG.19085.1	1.30376	0.582286
LE vs. ME	MSTRG.19408.1	7.01497	2.7778e-05
LE vs. ME	MSTRG.19403.1	0.207345	0.959474
LE vs. ME	MSTRG.19465.1	0.43721	0.70218
LE vs. ME	MSTRG.19813.1	-1.27802	0.118314
LE vs. ME	MSTRG.20176.1	1.26541	0.479418
LE vs. ME	MSTRG.20276.1	-1.57777	0.543383
LE vs. ME	MSTRG.21239.1	-0.199818	0.705145
LE vs. ME	MSTRG.21938.1	0.0807288	0.899796
LE vs. ME	MSTRG.22286.1	1.72378	0.257672
LE vs. ME	MSTRG.19447.2	-0.0413178	0.946864
LE vs. ME	MSTRG.19466.4	-0.165527	0.927619
LE vs. ME	MSTRG.20271.1	1.97897	0.624775
LE vs. ME	MSTRG.20376.1	-0.517495	0.754086
LE vs. ME	MSTRG.20418.1	-0.754435	0.853316
LE vs. ME	MSTRG.20886.1	0.527482	0.762647
LE vs. ME	MSTRG.21160.1	-3.70582	0.0129491
LE vs. ME	MSTRG.21737.1	0.794647	0.619081
LE vs. ME	MSTRG.22124.2	0.346615	0.703459
LE vs. ME	MSTRG.22311.1	-3.24252	0.249389
LE vs. ME	MSTRG.22783.1	1.16912	0.774483
LE vs. ME	MSTRG.22836.1	2.48096	0.133589
LE vs. ME	MSTRG.22906.1	-1.66016	0.112821
LE vs. ME	MSTRG.23511.2	0.207345	0.959474
LE vs. ME	MSTRG.23719.1	-3.05461	0.256741
LE vs. ME	MSTRG.23866.1	0.689584	0.504082
LE vs. ME	MSTRG.24368.1	-2.66044	NA
LE vs. ME	MSTRG.24394.2	0.872257	0.289199
LE vs. ME	MSTRG.24410.1	0.68808	0.351125
LE vs. ME	MSTRG.24587.2	1.16912	0.774483
LE vs. ME	MSTRG.25178.1	1.70078	0.205122
LE vs. ME	MSTRG.25224.2	0.207345	0.959474
LE vs. ME	MSTRG.25304.1	1.17902	0.356544
LE vs. ME	MSTRG.22827.1	-1.50172	0.3563
LE vs. ME	MSTRG.22924.1	-0.754435	0.853316
LE vs. ME	MSTRG.23643.12	0.445443	0.527674
LE vs. ME	MSTRG.23705.1	0.654996	0.486279
LE vs. ME	MSTRG.23924.1	4.33733	0.0252011
LE vs. ME	MSTRG.23955.1	-0.113526	0.92694
LE vs. ME	MSTRG.24128.1	1.05817	0.62611
LE vs. ME	MSTRG.24710.1	0.149589	0.811417
LE vs. ME	MSTRG.24927.3	0.708391	0.311494
LE vs. ME	MSTRG.25201.1	-1.81352	0.230759
LE vs. ME	MSTRG.25675.1	0.971639	0.810426
LE vs. ME	MSTRG.26049.1	2.05868	0.59365
LE vs. ME	MSTRG.26134.1	0.0826569	0.933769
LE vs. ME	MSTRG.26428.1	-1.97595	0.079407
LE vs. ME	MSTRG.27166.1	-0.813741	0.74047
LE vs. ME	MSTRG.27437.1	0.429871	0.767132
LE vs. ME	MSTRG.27595.1	0.810444	0.0647161
LE vs. ME	MSTRG.27612.1	-1.66236	0.680488
LE vs. ME	MSTRG.27665.1	-3.76284	NA
LE vs. ME	MSTRG.25553.1	-1.53346	0.141279
LE vs. ME	MSTRG.25814.1	-2.58372	0.00594134
LE vs. ME	MSTRG.26009.1	-0.754435	0.853316
LE vs. ME	MSTRG.26092.1	-0.829465	0.65331
LE vs. ME	MSTRG.26164.1	-0.724454	0.767239
LE vs. ME	MSTRG.26361.1	-0.406531	0.769327
LE vs. ME	MSTRG.27389.1	-1.69967	0.673478
LE vs. ME	MSTRG.27492.1	1.24162	0.4186
LE vs. ME	MSTRG.27494.1	1.97897	0.624775
LE vs. ME	MSTRG.27572.1	-2.24779	0.573572
LE vs. ME	MSTRG.27626.1	0.620524	0.738211
LE vs. ME	MSTRG.27741.1	-0.2146	0.883031
LE vs. ME	MSTRG.27746.2	-1.21512	0.701247
LE vs. ME	MSTRG.28010.1	-2.66306	0.5026
LE vs. ME	MSTRG.28207.1	-4.40927	0.0456871
LE vs. ME	MSTRG.28724.1	0.847465	0.340893
LE vs. ME	MSTRG.28747.1	-1.48357	0.64453
LE vs. ME	MSTRG.28752.1	0.591033	0.44598
LE vs. ME	MSTRG.28894.1	0.795268	0.340811
LE vs. ME	MSTRG.29361.1	1.51806	0.175889
LE vs. ME	MSTRG.29725.1	-1.73628	0.666621
LE vs. ME	MSTRG.27816.1	-3.04903	0.419533
LE vs. ME	MSTRG.28188.1	3.64329	0.0746344
LE vs. ME	MSTRG.28603.1	1.16912	0.774483
LE vs. ME	MSTRG.28968.11	-0.461445	0.742163
LE vs. ME	MSTRG.29466.1	-4.1129	3.17521e-05
LE vs. ME	MSTRG.29598.1	-1.15846	0.467889
LE vs. ME	MSTRG.29852.1	-0.754435	0.853316
LE vs. ME	MSTRG.29899.1	-4.3681	0.0396293
LE vs. ME	MSTRG.29939.1	-1.5834	0.137669
LE vs. ME	MSTRG.30034.1	2.03442	0.0252036
LE vs. ME	MSTRG.30119.7	0.207345	0.959474
LE vs. ME	MSTRG.30339.1	-1.0607	0.524522
LE vs. ME	MSTRG.30793.3	1.16912	0.774483
LE vs. ME	MSTRG.31463.3	-0.046807	0.935919
LE vs. ME	MSTRG.31715.1	-1.97923	0.491439
LE vs. ME	MSTRG.31847.1	-0.527901	0.609616
LE vs. ME	MSTRG.32130.1	1.10194	0.17224
LE vs. ME	MSTRG.32263.1	-0.328054	0.669842
LE vs. ME	MSTRG.32291.1	-0.461626	0.782489
LE vs. ME	MSTRG.32315.1	1.16912	0.774483
LE vs. ME	MSTRG.32354.1	0.166046	0.895502
LE vs. ME	MSTRG.32887.2	1.16912	0.774483
LE vs. ME	MSTRG.33214.1	2.08694	0.332095
LE vs. ME	MSTRG.33418.1	-0.714785	0.531292
LE vs. ME	MSTRG.29981.1	-0.754435	0.853316
LE vs. ME	MSTRG.29995.1	-0.38804	0.705861
LE vs. ME	MSTRG.30169.2	-0.60634	0.631143
LE vs. ME	MSTRG.31014.1	0.971639	0.810426
LE vs. ME	MSTRG.31992.1	-0.754435	0.853316
LE vs. ME	MSTRG.32236.1	-3.90169	0.207306
LE vs. ME	MSTRG.32390.2	0.455871	0.367137
LE vs. ME	MSTRG.32811.1	-1.18979	0.490808
LE vs. ME	MSTRG.33219.1	1.0684	0.660545
LE vs. ME	MSTRG.33622.4	-0.696322	0.708132
LE vs. ME	MSTRG.33662.1	-0.556677	0.606037
LE vs. ME	MSTRG.33671.1	0.25622	0.809082
LE vs. ME	MSTRG.33719.1	-0.700581	0.862222
LE vs. ME	MSTRG.33769.1	3.6187	0.261599
LE vs. ME	MSTRG.33930.1	-2.00932	0.0832271
LE vs. ME	MSTRG.34215.1	-0.741695	0.648449
LE vs. ME	MSTRG.34232.1	-0.0592929	0.963815
LE vs. ME	MSTRG.34409.1	2.03299	0.417567
LE vs. ME	MSTRG.35320.10	2.82828	0.282163
LE vs. ME	MSTRG.36143.1	-5.13553	0.0769543
LE vs. ME	MSTRG.33655.1	1.68684	0.444268
LE vs. ME	MSTRG.33779.1	0.690838	0.783287
LE vs. ME	MSTRG.34944.1	-1.33407	0.676061
LE vs. ME	MSTRG.35303.1	1.93341	0.633136
LE vs. ME	MSTRG.35619.1	-3.20595	0.242182
LE vs. ME	MSTRG.35928.1	-0.36471	0.654109
LE vs. ME	MSTRG.36236.1	-0.505964	0.682169
LE vs. ME	MSTRG.36372.2	-0.192922	0.895622
LE vs. ME	MSTRG.36579.1	2.84486	0.0548947
LE vs. ME	MSTRG.36804.3	1.0764	0.212762
LE vs. ME	MSTRG.37901.1	0.207345	0.959474
LE vs. ME	MSTRG.37931.1	0.787446	0.741604
LE vs. ME	MSTRG.36272.2	0.330491	0.579649
LE vs. ME	MSTRG.36286.1	2.53602	0.149947
LE vs. ME	MSTRG.36368.1	-7.0359	NA
LE vs. ME	MSTRG.36377.1	0.0348083	0.981273
LE vs. ME	MSTRG.36410.2	-2.47397	0.014213
LE vs. ME	MSTRG.36469.2	1.16912	0.774483
LE vs. ME	MSTRG.36813.1	-1.71393	0.436921
LE vs. ME	MSTRG.36940.1	-1.48554	0.224972
LE vs. ME	MSTRG.37074.1	-0.754435	0.853316
LE vs. ME	MSTRG.37238.3	-1.32102	0.12416
LE vs. ME	MSTRG.37254.1	-1.24564	0.44289
LE vs. ME	MSTRG.38068.2	2.36865	0.203216
LE vs. ME	MSTRG.38073.1	2.83491	0.476778
LE vs. ME	MSTRG.38116.1	-2.844	0.00784192
LE vs. ME	MSTRG.38814.1	-0.863824	0.530552
LE vs. ME	MSTRG.38941.1	1.16912	0.774483
LE vs. ME	MSTRG.38941.2	1.16912	0.774483
LE vs. ME	MSTRG.39059.9	-0.661225	0.749395
LE vs. ME	MSTRG.39106.1	0.71825	0.225213
LE vs. ME	MSTRG.39111.1	0.0580126	0.973684
LE vs. ME	MSTRG.39461.2	-1.71943	0.56779
LE vs. ME	MSTRG.39497.2	-0.754435	0.853316
LE vs. ME	MSTRG.40140.3	-3.33749	0.0984064
LE vs. ME	MSTRG.40388.3	-1.64719	0.42812
LE vs. ME	MSTRG.40448.1	-2.21074	0.580118
LE vs. ME	MSTRG.40511.1	-3.45179	0.000661677
LE vs. ME	MSTRG.40566.1	1.24841	0.507179
LE vs. ME	MSTRG.40570.8	0.946779	0.0610468
LE vs. ME	MSTRG.40575.1	0.686331	0.612121
LE vs. ME	MSTRG.40589.1	1.16912	0.774483
LE vs. ME	MSTRG.40640.1	0.481246	0.903977
LE vs. ME	MSTRG.38488.1	0.468997	0.589919
LE vs. ME	MSTRG.38833.1	0.203895	0.831948
LE vs. ME	MSTRG.39058.1	1.07134	0.778477
LE vs. ME	MSTRG.39166.1	-1.09471	0.62516
LE vs. ME	MSTRG.39568.2	0.592614	0.622972
LE vs. ME	MSTRG.39704.2	0.724693	0.638415
LE vs. ME	MSTRG.39961.1	-3.17124	0.13009
LE vs. ME	MSTRG.40561.1	-4.75107	0.215521
LE vs. ME	MSTRG.40667.2	-0.480318	0.609498
LE vs. ME	MSTRG.40763.1	-0.592022	0.88369
LE vs. ME	MSTRG.40799.1	0.207345	0.959474
LE vs. ME	MSTRG.40837.1	1.29595	0.539296
LE vs. ME	MSTRG.40997.1	-0.306286	0.759809
LE vs. ME	MSTRG.41060.1	0.348307	0.766975
LE vs. ME	MSTRG.41070.2	-1.63899	0.588147
LE vs. ME	MSTRG.41281.1	0.629839	0.240319
LE vs. ME	MSTRG.41418.1	1.53656	0.246935
LE vs. ME	MSTRG.41438.1	-0.405637	0.735862
LE vs. ME	MSTRG.41482.3	1.16912	0.774483
LE vs. ME	MSTRG.41542.1	0.373391	0.752837
LE vs. ME	MSTRG.41792.1	1.3554	0.575241
LE vs. ME	MSTRG.41859.5	4.01832	0.307929
LE vs. ME	MSTRG.41853.1	2.13599	0.596283
LE vs. ME	MSTRG.42188.1	0.0382341	0.970179
LE vs. ME	MSTRG.42208.1	0.0597233	0.961538
LE vs. ME	MSTRG.42227.1	0.861012	0.57961
LE vs. ME	MSTRG.42391.2	0.577076	0.530546
LE vs. ME	MSTRG.42714.1	-2.63474	0.507292
LE vs. ME	MSTRG.42778.1	-0.754435	0.853316
LE vs. ME	MSTRG.43515.1	-3.64131	0.13658
LE vs. ME	MSTRG.42715.1	1.03395	0.462181
LE vs. ME	MSTRG.42804.1	1.79208	0.561494
LE vs. ME	MSTRG.43366.1	2.79358	0.1333
LE vs. ME	MSTRG.43488.2	-0.101545	0.776894
LE vs. ME	MSTRG.44118.2	-0.257706	0.67845
LE vs. ME	MSTRG.44122.6	-0.754435	0.853316
LE vs. ME	MSTRG.44147.1	1.12689	0.442886
LE vs. ME	MSTRG.44147.3	1.65992	0.194899
