# Supplementary material for: Deciphering Estrus Expression in Gilts: The Role of Alternative Polyadenylation and LincRNAs in Reproductive Transcriptomics
Source: Animals (Basel). 2024 Mar 4;14(5):791. doi: 10.3390/ani14050791 (PMC10931002; doi:10.3390/ani14050791)
Supplement: Supplementary file 1 [file animals-14-00791-s001.zip › table S5.xlsx]

## Sheet: vulva
Table S5. Cis-acting target genes of differentially expressed lincRNAs.
1	StringTie	transcript	180147405	180162756	.	+	.	transcript_id "MSTRG.2633.2"; gene_id "MSTRG.2633"; xloc "XLOC_001183"; class_code "u"; tss_id "TSS2032";	1	ensembl	exon	180056949	180057080	.	-	.	gene_id "ENSSSCG00000005016"; gene_version "5"; transcript_id "ENSSSCT00000058026"; transcript_version "3"; exon_number "4"; gene_name "L2HGDH"; gene_source "ensembl"; gene_biotype "protein_coding"; transcript_name "L2HGDH-201"; transcript_source "ensembl"; transcript_biotype "protein_coding"; exon_id "ENSSSCE00000043013"; exon_version "1";
1	StringTie	transcript	180147405	180162756	.	+	.	transcript_id "MSTRG.2633.2"; gene_id "MSTRG.2633"; xloc "XLOC_001183"; class_code "u"; tss_id "TSS2032";	1	ensembl	CDS	180056949	180057080	.	-	0	gene_id "ENSSSCG00000005016"; gene_version "5"; transcript_id "ENSSSCT00000058026"; transcript_version "3"; exon_number "4"; gene_name "L2HGDH"; gene_source "ensembl"; gene_biotype "protein_coding"; transcript_name "L2HGDH-201"; transcript_source "ensembl"; transcript_biotype "protein_coding"; protein_id "ENSSSCP00000040701"; protein_version "2";
1	StringTie	transcript	180147405	180162756	.	+	.	transcript_id "MSTRG.2633.2"; gene_id "MSTRG.2633"; xloc "XLOC_001183"; class_code "u"; tss_id "TSS2032";	1	ensembl	exon	180056949	180057080	.	-	.	gene_id "ENSSSCG00000005016"; gene_version "5"; transcript_id "ENSSSCT00000063003"; transcript_version "3"; exon_number "4"; gene_name "L2HGDH"; gene_source "ensembl"; gene_biotype "protein_coding"; transcript_name "L2HGDH-202"; transcript_source "ensembl"; transcript_biotype "protein_coding"; exon_id "ENSSSCE00000043013"; exon_version "1";
1	StringTie	transcript	180147405	180162756	.	+	.	transcript_id "MSTRG.2633.2"; gene_id "MSTRG.2633"; xloc "XLOC_001183"; class_code "u"; tss_id "TSS2032";	1	ensembl	CDS	180056949	180057080	.	-	0	gene_id "ENSSSCG00000005016"; gene_version "5"; transcript_id "ENSSSCT00000063003"; transcript_version "3"; exon_number "4"; gene_name "L2HGDH"; gene_source "ensembl"; gene_biotype "protein_coding"; transcript_name "L2HGDH-202"; transcript_source "ensembl"; transcript_biotype "protein_coding"; protein_id "ENSSSCP00000034040"; protein_version "3";
1	StringTie	transcript	180147405	180162756	.	+	.	transcript_id "MSTRG.2633.2"; gene_id "MSTRG.2633"; xloc "XLOC_001183"; class_code "u"; tss_id "TSS2032";	1	ensembl	exon	180056949	180057080	.	-	.	gene_id "ENSSSCG00000005016"; gene_version "5"; transcript_id "ENSSSCT00000005532"; transcript_version "4"; exon_number "4"; gene_name "L2HGDH"; gene_source "ensembl"; gene_biotype "protein_coding"; transcript_name "L2HGDH-203"; transcript_source "ensembl"; transcript_biotype "protein_coding"; exon_id "ENSSSCE00000043013"; exon_version "1";
1	StringTie	transcript	180147405	180162756	.	+	.	transcript_id "MSTRG.2633.2"; gene_id "MSTRG.2633"; xloc "XLOC_001183"; class_code "u"; tss_id "TSS2032";	1	ensembl	CDS	180056949	180057080	.	-	0	gene_id "ENSSSCG00000005016"; gene_version "5"; transcript_id "ENSSSCT00000005532"; transcript_version "4"; exon_number "4"; gene_name "L2HGDH"; gene_source "ensembl"; gene_biotype "protein_coding"; transcript_name "L2HGDH-203"; transcript_source "ensembl"; transcript_biotype "protein_coding"; protein_id "ENSSSCP00000005394"; protein_version "3";
1	StringTie	transcript	180147405	180162756	.	+	.	transcript_id "MSTRG.2633.2"; gene_id "MSTRG.2633"; xloc "XLOC_001183"; class_code "u"; tss_id "TSS2032";	1	ensembl	exon	180056949	180057080	.	-	.	gene_id "ENSSSCG00000005016"; gene_version "5"; transcript_id "ENSSSCT00000079344"; transcript_version "2"; exon_number "4"; gene_name "L2HGDH"; gene_source "ensembl"; gene_biotype "protein_coding"; transcript_name "L2HGDH-204"; transcript_source "ensembl"; transcript_biotype "protein_coding"; exon_id "ENSSSCE00000043013"; exon_version "1";
1	StringTie	transcript	180147405	180162756	.	+	.	transcript_id "MSTRG.2633.2"; gene_id "MSTRG.2633"; xloc "XLOC_001183"; class_code "u"; tss_id "TSS2032";	1	ensembl	CDS	180056949	180057080	.	-	0	gene_id "ENSSSCG00000005016"; gene_version "5"; transcript_id "ENSSSCT00000079344"; transcript_version "2"; exon_number "4"; gene_name "L2HGDH"; gene_source "ensembl"; gene_biotype "protein_coding"; transcript_name "L2HGDH-204"; transcript_source "ensembl"; transcript_biotype "protein_coding"; protein_id "ENSSSCP00000066108"; protein_version "2";
1	StringTie	transcript	180147405	180162756	.	+	.	transcript_id "MSTRG.2633.2"; gene_id "MSTRG.2633"; xloc "XLOC_001183"; class_code "u"; tss_id "TSS2032";	1	ensembl	exon	180068926	180069146	.	-	.	gene_id "ENSSSCG00000005016"; gene_version "5"; transcript_id "ENSSSCT00000058026"; transcript_version "3"; exon_number "1"; gene_name "L2HGDH"; gene_source "ensembl"; gene_biotype "protein_coding"; transcript_name "L2HGDH-201"; transcript_source "ensembl"; transcript_biotype "protein_coding"; exon_id "ENSSSCE00000328990"; exon_version "2";
1	StringTie	transcript	180147405	180162756	.	+	.	transcript_id "MSTRG.2633.2"; gene_id "MSTRG.2633"; xloc "XLOC_001183"; class_code "u"; tss_id "TSS2032";	1	ensembl	CDS	180068926	180069065	.	-	0	gene_id "ENSSSCG00000005016"; gene_version "5"; transcript_id "ENSSSCT00000058026"; transcript_version "3"; exon_number "1"; gene_name "L2HGDH"; gene_source "ensembl"; gene_biotype "protein_coding"; transcript_name "L2HGDH-201"; transcript_source "ensembl"; transcript_biotype "protein_coding"; protein_id "ENSSSCP00000040701"; protein_version "2";
1	StringTie	transcript	180147405	180162756	.	+	.	transcript_id "MSTRG.2633.2"; gene_id "MSTRG.2633"; xloc "XLOC_001183"; class_code "u"; tss_id "TSS2032";	1	ensembl	start_codon	180069063	180069065	.	-	0	gene_id "ENSSSCG00000005016"; gene_version "5"; transcript_id "ENSSSCT00000058026"; transcript_version "3"; exon_number "1"; gene_name "L2HGDH"; gene_source "ensembl"; gene_biotype "protein_coding"; transcript_name "L2HGDH-201"; transcript_source "ensembl"; transcript_biotype "protein_coding";
1	StringTie	transcript	180147405	180162756	.	+	.	transcript_id "MSTRG.2633.2"; gene_id "MSTRG.2633"; xloc "XLOC_001183"; class_code "u"; tss_id "TSS2032";	1	ensembl	exon	180065356	180065471	.	-	.	gene_id "ENSSSCG00000005016"; gene_version "5"; transcript_id "ENSSSCT00000058026"; transcript_version "3"; exon_number "2"; gene_name "L2HGDH"; gene_source "ensembl"; gene_biotype "protein_coding"; transcript_name "L2HGDH-201"; transcript_source "ensembl"; transcript_biotype "protein_coding"; exon_id "ENSSSCE00000043011"; exon_version "1";
1	StringTie	transcript	180147405	180162756	.	+	.	transcript_id "MSTRG.2633.2"; gene_id "MSTRG.2633"; xloc "XLOC_001183"; class_code "u"; tss_id "TSS2032";	1	ensembl	CDS	180065356	180065471	.	-	1	gene_id "ENSSSCG00000005016"; gene_version "5"; transcript_id "ENSSSCT00000058026"; transcript_version "3"; exon_number "2"; gene_name "L2HGDH"; gene_source "ensembl"; gene_biotype "protein_coding"; transcript_name "L2HGDH-201"; transcript_source "ensembl"; transcript_biotype "protein_coding"; protein_id "ENSSSCP00000040701"; protein_version "2";
1	StringTie	transcript	180147405	180162756	.	+	.	transcript_id "MSTRG.2633.2"; gene_id "MSTRG.2633"; xloc "XLOC_001183"; class_code "u"; tss_id "TSS2032";	1	ensembl	exon	180064546	180064697	.	-	.	gene_id "ENSSSCG00000005016"; gene_version "5"; transcript_id "ENSSSCT00000058026"; transcript_version "3"; exon_number "3"; gene_name "L2HGDH"; gene_source "ensembl"; gene_biotype "protein_coding"; transcript_name "L2HGDH-201"; transcript_source "ensembl"; transcript_biotype "protein_coding"; exon_id "ENSSSCE00000043012"; exon_version "1";
1	StringTie	transcript	180147405	180162756	.	+	.	transcript_id "MSTRG.2633.2"; gene_id "MSTRG.2633"; xloc "XLOC_001183"; class_code "u"; tss_id "TSS2032";	1	ensembl	CDS	180064546	180064697	.	-	2	gene_id "ENSSSCG00000005016"; gene_version "5"; transcript_id "ENSSSCT00000058026"; transcript_version "3"; exon_number "3"; gene_name "L2HGDH"; gene_source "ensembl"; gene_biotype "protein_coding"; transcript_name "L2HGDH-201"; transcript_source "ensembl"; transcript_biotype "protein_coding"; protein_id "ENSSSCP00000040701"; protein_version "2";
1	StringTie	transcript	180147405	180162756	.	+	.	transcript_id "MSTRG.2633.2"; gene_id "MSTRG.2633"; xloc "XLOC_001183"; class_code "u"; tss_id "TSS2032";	1	ensembl	five_prime_utr	180069066	180069146	.	-	.	gene_id "ENSSSCG00000005016"; gene_version "5"; transcript_id "ENSSSCT00000058026"; transcript_version "3"; gene_name "L2HGDH"; gene_source "ensembl"; gene_biotype "protein_coding"; transcript_name "L2HGDH-201"; transcript_source "ensembl"; transcript_biotype "protein_coding";
1	StringTie	transcript	180147405	180162756	.	+	.	transcript_id "MSTRG.2633.2"; gene_id "MSTRG.2633"; xloc "XLOC_001183"; class_code "u"; tss_id "TSS2032";	1	ensembl	exon	180068926	180069146	.	-	.	gene_id "ENSSSCG00000005016"; gene_version "5"; transcript_id "ENSSSCT00000063003"; transcript_version "3"; exon_number "1"; gene_name "L2HGDH"; gene_source "ensembl"; gene_biotype "protein_coding"; transcript_name "L2HGDH-202"; transcript_source "ensembl"; transcript_biotype "protein_coding"; exon_id "ENSSSCE00000328990"; exon_version "2";
1	StringTie	transcript	180147405	180162756	.	+	.	transcript_id "MSTRG.2633.2"; gene_id "MSTRG.2633"; xloc "XLOC_001183"; class_code "u"; tss_id "TSS2032";	1	ensembl	CDS	180068926	180069065	.	-	0	gene_id "ENSSSCG00000005016"; gene_version "5"; transcript_id "ENSSSCT00000063003"; transcript_version "3"; exon_number "1"; gene_name "L2HGDH"; gene_source "ensembl"; gene_biotype "protein_coding"; transcript_name "L2HGDH-202"; transcript_source "ensembl"; transcript_biotype "protein_coding"; protein_id "ENSSSCP00000034040"; protein_version "3";
1	StringTie	transcript	180147405	180162756	.	+	.	transcript_id "MSTRG.2633.2"; gene_id "MSTRG.2633"; xloc "XLOC_001183"; class_code "u"; tss_id "TSS2032";	1	ensembl	start_codon	180069063	180069065	.	-	0	gene_id "ENSSSCG00000005016"; gene_version "5"; transcript_id "ENSSSCT00000063003"; transcript_version "3"; exon_number "1"; gene_name "L2HGDH"; gene_source "ensembl"; gene_biotype "protein_coding"; transcript_name "L2HGDH-202"; transcript_source "ensembl"; transcript_biotype "protein_coding";
1	StringTie	transcript	180147405	180162756	.	+	.	transcript_id "MSTRG.2633.2"; gene_id "MSTRG.2633"; xloc "XLOC_001183"; class_code "u"; tss_id "TSS2032";	1	ensembl	exon	180065356	180065471	.	-	.	gene_id "ENSSSCG00000005016"; gene_version "5"; transcript_id "ENSSSCT00000063003"; transcript_version "3"; exon_number "2"; gene_name "L2HGDH"; gene_source "ensembl"; gene_biotype "protein_coding"; transcript_name "L2HGDH-202"; transcript_source "ensembl"; transcript_biotype "protein_coding"; exon_id "ENSSSCE00000043011"; exon_version "1";
1	StringTie	transcript	180147405	180162756	.	+	.	transcript_id "MSTRG.2633.2"; gene_id "MSTRG.2633"; xloc "XLOC_001183"; class_code "u"; tss_id "TSS2032";	1	ensembl	CDS	180065356	180065471	.	-	1	gene_id "ENSSSCG00000005016"; gene_version "5"; transcript_id "ENSSSCT00000063003"; transcript_version "3"; exon_number "2"; gene_name "L2HGDH"; gene_source "ensembl"; gene_biotype "protein_coding"; transcript_name "L2HGDH-202"; transcript_source "ensembl"; transcript_biotype "protein_coding"; protein_id "ENSSSCP00000034040"; protein_version "3";
1	StringTie	transcript	180147405	180162756	.	+	.	transcript_id "MSTRG.2633.2"; gene_id "MSTRG.2633"; xloc "XLOC_001183"; class_code "u"; tss_id "TSS2032";	1	ensembl	exon	180064546	180064697	.	-	.	gene_id "ENSSSCG00000005016"; gene_version "5"; transcript_id "ENSSSCT00000063003"; transcript_version "3"; exon_number "3"; gene_name "L2HGDH"; gene_source "ensembl"; gene_biotype "protein_coding"; transcript_name "L2HGDH-202"; transcript_source "ensembl"; transcript_biotype "protein_coding"; exon_id "ENSSSCE00000043012"; exon_version "1";
1	StringTie	transcript	180147405	180162756	.	+	.	transcript_id "MSTRG.2633.2"; gene_id "MSTRG.2633"; xloc "XLOC_001183"; class_code "u"; tss_id "TSS2032";	1	ensembl	CDS	180064546	180064697	.	-	2	gene_id "ENSSSCG00000005016"; gene_version "5"; transcript_id "ENSSSCT00000063003"; transcript_version "3"; exon_number "3"; gene_name "L2HGDH"; gene_source "ensembl"; gene_biotype "protein_coding"; transcript_name "L2HGDH-202"; transcript_source "ensembl"; transcript_biotype "protein_coding"; protein_id "ENSSSCP00000034040"; protein_version "3";
1	StringTie	transcript	180147405	180162756	.	+	.	transcript_id "MSTRG.2633.2"; gene_id "MSTRG.2633"; xloc "XLOC_001183"; class_code "u"; tss_id "TSS2032";	1	ensembl	five_prime_utr	180069066	180069146	.	-	.	gene_id "ENSSSCG00000005016"; gene_version "5"; transcript_id "ENSSSCT00000063003"; transcript_version "3"; gene_name "L2HGDH"; gene_source "ensembl"; gene_biotype "protein_coding"; transcript_name "L2HGDH-202"; transcript_source "ensembl"; transcript_biotype "protein_coding";
1	StringTie	transcript	180147405	180162756	.	+	.	transcript_id "MSTRG.2633.2"; gene_id "MSTRG.2633"; xloc "XLOC_001183"; class_code "u"; tss_id "TSS2032";	1	ensembl	exon	180068926	180069146	.	-	.	gene_id "ENSSSCG00000005016"; gene_version "5"; transcript_id "ENSSSCT00000005532"; transcript_version "4"; exon_number "1"; gene_name "L2HGDH"; gene_source "ensembl"; gene_biotype "protein_coding"; transcript_name "L2HGDH-203"; transcript_source "ensembl"; transcript_biotype "protein_coding"; exon_id "ENSSSCE00000328990"; exon_version "2";
1	StringTie	transcript	180147405	180162756	.	+	.	transcript_id "MSTRG.2633.2"; gene_id "MSTRG.2633"; xloc "XLOC_001183"; class_code "u"; tss_id "TSS2032";	1	ensembl	CDS	180068926	180069065	.	-	0	gene_id "ENSSSCG00000005016"; gene_version "5"; transcript_id "ENSSSCT00000005532"; transcript_version "4"; exon_number "1"; gene_name "L2HGDH"; gene_source "ensembl"; gene_biotype "protein_coding"; transcript_name "L2HGDH-203"; transcript_source "ensembl"; transcript_biotype "protein_coding"; protein_id "ENSSSCP00000005394"; protein_version "3";
1	StringTie	transcript	180147405	180162756	.	+	.	transcript_id "MSTRG.2633.2"; gene_id "MSTRG.2633"; xloc "XLOC_001183"; class_code "u"; tss_id "TSS2032";	1	ensembl	start_codon	180069063	180069065	.	-	0	gene_id "ENSSSCG00000005016"; gene_version "5"; transcript_id "ENSSSCT00000005532"; transcript_version "4"; exon_number "1"; gene_name "L2HGDH"; gene_source "ensembl"; gene_biotype "protein_coding"; transcript_name "L2HGDH-203"; transcript_source "ensembl"; transcript_biotype "protein_coding";
1	StringTie	transcript	180147405	180162756	.	+	.	transcript_id "MSTRG.2633.2"; gene_id "MSTRG.2633"; xloc "XLOC_001183"; class_code "u"; tss_id "TSS2032";	1	ensembl	exon	180065356	180065471	.	-	.	gene_id "ENSSSCG00000005016"; gene_version "5"; transcript_id "ENSSSCT00000005532"; transcript_version "4"; exon_number "2"; gene_name "L2HGDH"; gene_source "ensembl"; gene_biotype "protein_coding"; transcript_name "L2HGDH-203"; transcript_source "ensembl"; transcript_biotype "protein_coding"; exon_id "ENSSSCE00000043011"; exon_version "1";
1	StringTie	transcript	180147405	180162756	.	+	.	transcript_id "MSTRG.2633.2"; gene_id "MSTRG.2633"; xloc "XLOC_001183"; class_code "u"; tss_id "TSS2032";	1	ensembl	CDS	180065356	180065471	.	-	1	gene_id "ENSSSCG00000005016"; gene_version "5"; transcript_id "ENSSSCT00000005532"; transcript_version "4"; exon_number "2"; gene_name "L2HGDH"; gene_source "ensembl"; gene_biotype "protein_coding"; transcript_name "L2HGDH-203"; transcript_source "ensembl"; transcript_biotype "protein_coding"; protein_id "ENSSSCP00000005394"; protein_version "3";
1	StringTie	transcript	180147405	180162756	.	+	.	transcript_id "MSTRG.2633.2"; gene_id "MSTRG.2633"; xloc "XLOC_001183"; class_code "u"; tss_id "TSS2032";	1	ensembl	exon	180064546	180064697	.	-	.	gene_id "ENSSSCG00000005016"; gene_version "5"; transcript_id "ENSSSCT00000005532"; transcript_version "4"; exon_number "3"; gene_name "L2HGDH"; gene_source "ensembl"; gene_biotype "protein_coding"; transcript_name "L2HGDH-203"; transcript_source "ensembl"; transcript_biotype "protein_coding"; exon_id "ENSSSCE00000043012"; exon_version "1";
1	StringTie	transcript	180147405	180162756	.	+	.	transcript_id "MSTRG.2633.2"; gene_id "MSTRG.2633"; xloc "XLOC_001183"; class_code "u"; tss_id "TSS2032";	1	ensembl	CDS	180064546	180064697	.	-	2	gene_id "ENSSSCG00000005016"; gene_version "5"; transcript_id "ENSSSCT00000005532"; transcript_version "4"; exon_number "3"; gene_name "L2HGDH"; gene_source "ensembl"; gene_biotype "protein_coding"; transcript_name "L2HGDH-203"; transcript_source "ensembl"; transcript_biotype "protein_coding"; protein_id "ENSSSCP00000005394"; protein_version "3";
1	StringTie	transcript	180147405	180162756	.	+	.	transcript_id "MSTRG.2633.2"; gene_id "MSTRG.2633"; xloc "XLOC_001183"; class_code "u"; tss_id "TSS2032";	1	ensembl	five_prime_utr	180069066	180069146	.	-	.	gene_id "ENSSSCG00000005016"; gene_version "5"; transcript_id "ENSSSCT00000005532"; transcript_version "4"; gene_name "L2HGDH"; gene_source "ensembl"; gene_biotype "protein_coding"; transcript_name "L2HGDH-203"; transcript_source "ensembl"; transcript_biotype "protein_coding";
1	StringTie	transcript	180147405	180162756	.	+	.	transcript_id "MSTRG.2633.2"; gene_id "MSTRG.2633"; xloc "XLOC_001183"; class_code "u"; tss_id "TSS2032";	1	ensembl	exon	180068926	180069099	.	-	.	gene_id "ENSSSCG00000005016"; gene_version "5"; transcript_id "ENSSSCT00000079344"; transcript_version "2"; exon_number "1"; gene_name "L2HGDH"; gene_source "ensembl"; gene_biotype "protein_coding"; transcript_name "L2HGDH-204"; transcript_source "ensembl"; transcript_biotype "protein_coding"; exon_id "ENSSSCE00000043010"; exon_version "4";
1	StringTie	transcript	180147405	180162756	.	+	.	transcript_id "MSTRG.2633.2"; gene_id "MSTRG.2633"; xloc "XLOC_001183"; class_code "u"; tss_id "TSS2032";	1	ensembl	CDS	180068926	180069065	.	-	0	gene_id "ENSSSCG00000005016"; gene_version "5"; transcript_id "ENSSSCT00000079344"; transcript_version "2"; exon_number "1"; gene_name "L2HGDH"; gene_source "ensembl"; gene_biotype "protein_coding"; transcript_name "L2HGDH-204"; transcript_source "ensembl"; transcript_biotype "protein_coding"; protein_id "ENSSSCP00000066108"; protein_version "2";
1	StringTie	transcript	180147405	180162756	.	+	.	transcript_id "MSTRG.2633.2"; gene_id "MSTRG.2633"; xloc "XLOC_001183"; class_code "u"; tss_id "TSS2032";	1	ensembl	start_codon	180069063	180069065	.	-	0	gene_id "ENSSSCG00000005016"; gene_version "5"; transcript_id "ENSSSCT00000079344"; transcript_version "2"; exon_number "1"; gene_name "L2HGDH"; gene_source "ensembl"; gene_biotype "protein_coding"; transcript_name "L2HGDH-204"; transcript_source "ensembl"; transcript_biotype "protein_coding";
1	StringTie	transcript	180147405	180162756	.	+	.	transcript_id "MSTRG.2633.2"; gene_id "MSTRG.2633"; xloc "XLOC_001183"; class_code "u"; tss_id "TSS2032";	1	ensembl	exon	180065356	180065471	.	-	.	gene_id "ENSSSCG00000005016"; gene_version "5"; transcript_id "ENSSSCT00000079344"; transcript_version "2"; exon_number "2"; gene_name "L2HGDH"; gene_source "ensembl"; gene_biotype "protein_coding"; transcript_name "L2HGDH-204"; transcript_source "ensembl"; transcript_biotype "protein_coding"; exon_id "ENSSSCE00000043011"; exon_version "1";
1	StringTie	transcript	180147405	180162756	.	+	.	transcript_id "MSTRG.2633.2"; gene_id "MSTRG.2633"; xloc "XLOC_001183"; class_code "u"; tss_id "TSS2032";	1	ensembl	CDS	180065356	180065471	.	-	1	gene_id "ENSSSCG00000005016"; gene_version "5"; transcript_id "ENSSSCT00000079344"; transcript_version "2"; exon_number "2"; gene_name "L2HGDH"; gene_source "ensembl"; gene_biotype "protein_coding"; transcript_name "L2HGDH-204"; transcript_source "ensembl"; transcript_biotype "protein_coding"; protein_id "ENSSSCP00000066108"; protein_version "2";
1	StringTie	transcript	180147405	180162756	.	+	.	transcript_id "MSTRG.2633.2"; gene_id "MSTRG.2633"; xloc "XLOC_001183"; class_code "u"; tss_id "TSS2032";	1	ensembl	exon	180064546	180064697	.	-	.	gene_id "ENSSSCG00000005016"; gene_version "5"; transcript_id "ENSSSCT00000079344"; transcript_version "2"; exon_number "3"; gene_name "L2HGDH"; gene_source "ensembl"; gene_biotype "protein_coding"; transcript_name "L2HGDH-204"; transcript_source "ensembl"; transcript_biotype "protein_coding"; exon_id "ENSSSCE00000043012"; exon_version "1";
1	StringTie	transcript	180147405	180162756	.	+	.	transcript_id "MSTRG.2633.2"; gene_id "MSTRG.2633"; xloc "XLOC_001183"; class_code "u"; tss_id "TSS2032";	1	ensembl	CDS	180064546	180064697	.	-	2	gene_id "ENSSSCG00000005016"; gene_version "5"; transcript_id "ENSSSCT00000079344"; transcript_version "2"; exon_number "3"; gene_name "L2HGDH"; gene_source "ensembl"; gene_biotype "protein_coding"; transcript_name "L2HGDH-204"; transcript_source "ensembl"; transcript_biotype "protein_coding"; protein_id "ENSSSCP00000066108"; protein_version "2";
1	StringTie	transcript	180147405	180162756	.	+	.	transcript_id "MSTRG.2633.2"; gene_id "MSTRG.2633"; xloc "XLOC_001183"; class_code "u"; tss_id "TSS2032";	1	ensembl	five_prime_utr	180069066	180069099	.	-	.	gene_id "ENSSSCG00000005016"; gene_version "5"; transcript_id "ENSSSCT00000079344"; transcript_version "2"; gene_name "L2HGDH"; gene_source "ensembl"; gene_biotype "protein_coding"; transcript_name "L2HGDH-204"; transcript_source "ensembl"; transcript_biotype "protein_coding";
1	StringTie	transcript	180147405	180162756	.	+	.	transcript_id "MSTRG.2633.2"; gene_id "MSTRG.2633"; xloc "XLOC_001183"; class_code "u"; tss_id "TSS2032";	1	ensembl	exon	180069248	180069307	.	+	.	gene_id "ENSSSCG00000031354"; gene_version "3"; transcript_id "ENSSSCT00000094980"; transcript_version "1"; exon_number "1"; gene_name "DMAC2L"; gene_source "ensembl"; gene_biotype "protein_coding"; transcript_name "DMAC2L-201"; transcript_source "ensembl"; transcript_biotype "protein_coding"; exon_id "ENSSSCE00000522885"; exon_version "1";
1	StringTie	transcript	180147405	180162756	.	+	.	transcript_id "MSTRG.2633.2"; gene_id "MSTRG.2633"; xloc "XLOC_001183"; class_code "u"; tss_id "TSS2032";	1	ensembl	exon	180074977	180075241	.	+	.	gene_id "ENSSSCG00000031354"; gene_version "3"; transcript_id "ENSSSCT00000094980"; transcript_version "1"; exon_number "2"; gene_name "DMAC2L"; gene_source "ensembl"; gene_biotype "protein_coding"; transcript_name "DMAC2L-201"; transcript_source "ensembl"; transcript_biotype "protein_coding"; exon_id "ENSSSCE00000515491"; exon_version "1";
1	StringTie	transcript	180147405	180162756	.	+	.	transcript_id "MSTRG.2633.2"; gene_id "MSTRG.2633"; xloc "XLOC_001183"; class_code "u"; tss_id "TSS2032";	1	ensembl	exon	180075360	180075471	.	+	.	gene_id "ENSSSCG00000031354"; gene_version "3"; transcript_id "ENSSSCT00000094980"; transcript_version "1"; exon_number "3"; gene_name "DMAC2L"; gene_source "ensembl"; gene_biotype "protein_coding"; transcript_name "DMAC2L-201"; transcript_source "ensembl"; transcript_biotype "protein_coding"; exon_id "ENSSSCE00000336988"; exon_version "1";
1	StringTie	transcript	180147405	180162756	.	+	.	transcript_id "MSTRG.2633.2"; gene_id "MSTRG.2633"; xloc "XLOC_001183"; class_code "u"; tss_id "TSS2032";	1	ensembl	CDS	180075365	180075471	.	+	0	gene_id "ENSSSCG00000031354"; gene_version "3"; transcript_id "ENSSSCT00000094980"; transcript_version "1"; exon_number "3"; gene_name "DMAC2L"; gene_source "ensembl"; gene_biotype "protein_coding"; transcript_name "DMAC2L-201"; transcript_source "ensembl"; transcript_biotype "protein_coding"; protein_id "ENSSSCP00000080422"; protein_version "1";
1	StringTie	transcript	180147405	180162756	.	+	.	transcript_id "MSTRG.2633.2"; gene_id "MSTRG.2633"; xloc "XLOC_001183"; class_code "u"; tss_id "TSS2032";	1	ensembl	start_codon	180075365	180075367	.	+	0	gene_id "ENSSSCG00000031354"; gene_version "3"; transcript_id "ENSSSCT00000094980"; transcript_version "1"; exon_number "3"; gene_name "DMAC2L"; gene_source "ensembl"; gene_biotype "protein_coding"; transcript_name "DMAC2L-201"; transcript_source "ensembl"; transcript_biotype "protein_coding";
1	StringTie	transcript	180147405	180162756	.	+	.	transcript_id "MSTRG.2633.2"; gene_id "MSTRG.2633"; xloc "XLOC_001183"; class_code "u"; tss_id "TSS2032";	1	ensembl	five_prime_utr	180069248	180069307	.	+	.	gene_id "ENSSSCG00000031354"; gene_version "3"; transcript_id "ENSSSCT00000094980"; transcript_version "1"; gene_name "DMAC2L"; gene_source "ensembl"; gene_biotype "protein_coding"; transcript_name "DMAC2L-201"; transcript_source "ensembl"; transcript_biotype "protein_coding";
1	StringTie	transcript	180147405	180162756	.	+	.	transcript_id "MSTRG.2633.2"; gene_id "MSTRG.2633"; xloc "XLOC_001183"; class_code "u"; tss_id "TSS2032";	1	ensembl	five_prime_utr	180074977	180075241	.	+	.	gene_id "ENSSSCG00000031354"; gene_version "3"; transcript_id "ENSSSCT00000094980"; transcript_version "1"; gene_name "DMAC2L"; gene_source "ensembl"; gene_biotype "protein_coding"; transcript_name "DMAC2L-201"; transcript_source "ensembl"; transcript_biotype "protein_coding";
1	StringTie	transcript	180147405	180162756	.	+	.	transcript_id "MSTRG.2633.2"; gene_id "MSTRG.2633"; xloc "XLOC_001183"; class_code "u"; tss_id "TSS2032";	1	ensembl	five_prime_utr	180075360	180075364	.	+	.	gene_id "ENSSSCG00000031354"; gene_version "3"; transcript_id "ENSSSCT00000094980"; transcript_version "1"; gene_name "DMAC2L"; gene_source "ensembl"; gene_biotype "protein_coding"; transcript_name "DMAC2L-201"; transcript_source "ensembl"; transcript_biotype "protein_coding";
1	StringTie	transcript	180147405	180162756	.	+	.	transcript_id "MSTRG.2633.2"; gene_id "MSTRG.2633"; xloc "XLOC_001183"; class_code "u"; tss_id "TSS2032";	1	ensembl	exon	180069248	180069307	.	+	.	gene_id "ENSSSCG00000031354"; gene_version "3"; transcript_id "ENSSSCT00000094790"; transcript_version "1"; exon_number "1"; gene_name "DMAC2L"; gene_source "ensembl"; gene_biotype "protein_coding"; transcript_name "DMAC2L-202"; transcript_source "ensembl"; transcript_biotype "protein_coding"; exon_id "ENSSSCE00000522885"; exon_version "1";
1	StringTie	transcript	180147405	180162756	.	+	.	transcript_id "MSTRG.2633.2"; gene_id "MSTRG.2633"; xloc "XLOC_001183"; class_code "u"; tss_id "TSS2032";	1	ensembl	exon	180074977	180075241	.	+	.	gene_id "ENSSSCG00000031354"; gene_version "3"; transcript_id "ENSSSCT00000094790"; transcript_version "1"; exon_number "2"; gene_name "DMAC2L"; gene_source "ensembl"; gene_biotype "protein_coding"; transcript_name "DMAC2L-202"; transcript_source "ensembl"; transcript_biotype "protein_coding"; exon_id "ENSSSCE00000515491"; exon_version "1";
1	StringTie	transcript	180147405	180162756	.	+	.	transcript_id "MSTRG.2633.2"; gene_id "MSTRG.2633"; xloc "XLOC_001183"; class_code "u"; tss_id "TSS2032";	1	ensembl	exon	180075360	180075471	.	+	.	gene_id "ENSSSCG00000031354"; gene_version "3"; transcript_id "ENSSSCT00000094790"; transcript_version "1"; exon_number "3"; gene_name "DMAC2L"; gene_source "ensembl"; gene_biotype "protein_coding"; transcript_name "DMAC2L-202"; transcript_source "ensembl"; transcript_biotype "protein_coding"; exon_id "ENSSSCE00000336988"; exon_version "1";
1	StringTie	transcript	180147405	180162756	.	+	.	transcript_id "MSTRG.2633.2"; gene_id "MSTRG.2633"; xloc "XLOC_001183"; class_code "u"; tss_id "TSS2032";	1	ensembl	CDS	180075365	180075471	.	+	0	gene_id "ENSSSCG00000031354"; gene_version "3"; transcript_id "ENSSSCT00000094790"; transcript_version "1"; exon_number "3"; gene_name "DMAC2L"; gene_source "ensembl"; gene_biotype "protein_coding"; transcript_name "DMAC2L-202"; transcript_source "ensembl"; transcript_biotype "protein_coding"; protein_id "ENSSSCP00000075286"; protein_version "1";
1	StringTie	transcript	180147405	180162756	.	+	.	transcript_id "MSTRG.2633.2"; gene_id "MSTRG.2633"; xloc "XLOC_001183"; class_code "u"; tss_id "TSS2032";	1	ensembl	start_codon	180075365	180075367	.	+	0	gene_id "ENSSSCG00000031354"; gene_version "3"; transcript_id "ENSSSCT00000094790"; transcript_version "1"; exon_number "3"; gene_name "DMAC2L"; gene_source "ensembl"; gene_biotype "protein_coding"; transcript_name "DMAC2L-202"; transcript_source "ensembl"; transcript_biotype "protein_coding";
1	StringTie	transcript	180147405	180162756	.	+	.	transcript_id "MSTRG.2633.2"; gene_id "MSTRG.2633"; xloc "XLOC_001183"; class_code "u"; tss_id "TSS2032";	1	ensembl	five_prime_utr	180069248	180069307	.	+	.	gene_id "ENSSSCG00000031354"; gene_version "3"; transcript_id "ENSSSCT00000094790"; transcript_version "1"; gene_name "DMAC2L"; gene_source "ensembl"; gene_biotype "protein_coding"; transcript_name "DMAC2L-202"; transcript_source "ensembl"; transcript_biotype "protein_coding";
1	StringTie	transcript	180147405	180162756	.	+	.	transcript_id "MSTRG.2633.2"; gene_id "MSTRG.2633"; xloc "XLOC_001183"; class_code "u"; tss_id "TSS2032";	1	ensembl	five_prime_utr	180074977	180075241	.	+	.	gene_id "ENSSSCG00000031354"; gene_version "3"; transcript_id "ENSSSCT00000094790"; transcript_version "1"; gene_name "DMAC2L"; gene_source "ensembl"; gene_biotype "protein_coding"; transcript_name "DMAC2L-202"; transcript_source "ensembl"; transcript_biotype "protein_coding";
1	StringTie	transcript	180147405	180162756	.	+	.	transcript_id "MSTRG.2633.2"; gene_id "MSTRG.2633"; xloc "XLOC_001183"; class_code "u"; tss_id "TSS2032";	1	ensembl	five_prime_utr	180075360	180075364	.	+	.	gene_id "ENSSSCG00000031354"; gene_version "3"; transcript_id "ENSSSCT00000094790"; transcript_version "1"; gene_name "DMAC2L"; gene_source "ensembl"; gene_biotype "protein_coding"; transcript_name "DMAC2L-202"; transcript_source "ensembl"; transcript_biotype "protein_coding";
1	StringTie	transcript	180147405	180162756	.	+	.	transcript_id "MSTRG.2633.2"; gene_id "MSTRG.2633"; xloc "XLOC_001183"; class_code "u"; tss_id "TSS2032";	1	ensembl	exon	180069245	180069307	.	+	.	gene_id "ENSSSCG00000031354"; gene_version "3"; transcript_id "ENSSSCT00000041018"; transcript_version "3"; exon_number "1"; gene_name "DMAC2L"; gene_source "ensembl"; gene_biotype "protein_coding"; transcript_name "DMAC2L-203"; transcript_source "ensembl"; transcript_biotype "protein_coding"; exon_id "ENSSSCE00000043020"; exon_version "5";
1	StringTie	transcript	180147405	180162756	.	+	.	transcript_id "MSTRG.2633.2"; gene_id "MSTRG.2633"; xloc "XLOC_001183"; class_code "u"; tss_id "TSS2032";	1	ensembl	exon	180075048	180075241	.	+	.	gene_id "ENSSSCG00000031354"; gene_version "3"; transcript_id "ENSSSCT00000041018"; transcript_version "3"; exon_number "2"; gene_name "DMAC2L"; gene_source "ensembl"; gene_biotype "protein_coding"; transcript_name "DMAC2L-203"; transcript_source "ensembl"; transcript_biotype "protein_coding"; exon_id "ENSSSCE00000043021"; exon_version "1";
1	StringTie	transcript	180147405	180162756	.	+	.	transcript_id "MSTRG.2633.2"; gene_id "MSTRG.2633"; xloc "XLOC_001183"; class_code "u"; tss_id "TSS2032";	1	ensembl	exon	180075360	180075471	.	+	.	gene_id "ENSSSCG00000031354"; gene_version "3"; transcript_id "ENSSSCT00000041018"; transcript_version "3"; exon_number "3"; gene_name "DMAC2L"; gene_source "ensembl"; gene_biotype "protein_coding"; transcript_name "DMAC2L-203"; transcript_source "ensembl"; transcript_biotype "protein_coding"; exon_id "ENSSSCE00000336988"; exon_version "1";
1	StringTie	transcript	180147405	180162756	.	+	.	transcript_id "MSTRG.2633.2"; gene_id "MSTRG.2633"; xloc "XLOC_001183"; class_code "u"; tss_id "TSS2032";	1	ensembl	CDS	180075365	180075471	.	+	0	gene_id "ENSSSCG00000031354"; gene_version "3"; transcript_id "ENSSSCT00000041018"; transcript_version "3"; exon_number "3"; gene_name "DMAC2L"; gene_source "ensembl"; gene_biotype "protein_coding"; transcript_name "DMAC2L-203"; transcript_source "ensembl"; transcript_biotype "protein_coding"; protein_id "ENSSSCP00000035990"; protein_version "1";
1	StringTie	transcript	180147405	180162756	.	+	.	transcript_id "MSTRG.2633.2"; gene_id "MSTRG.2633"; xloc "XLOC_001183"; class_code "u"; tss_id "TSS2032";	1	ensembl	start_codon	180075365	180075367	.	+	0	gene_id "ENSSSCG00000031354"; gene_version "3"; transcript_id "ENSSSCT00000041018"; transcript_version "3"; exon_number "3"; gene_name "DMAC2L"; gene_source "ensembl"; gene_biotype "protein_coding"; transcript_name "DMAC2L-203"; transcript_source "ensembl"; transcript_biotype "protein_coding";
1	StringTie	transcript	180147405	180162756	.	+	.	transcript_id "MSTRG.2633.2"; gene_id "MSTRG.2633"; xloc "XLOC_001183"; class_code "u"; tss_id "TSS2032";	1	ensembl	five_prime_utr	180069245	180069307	.	+	.	gene_id "ENSSSCG00000031354"; gene_version "3"; transcript_id "ENSSSCT00000041018"; transcript_version "3"; gene_name "DMAC2L"; gene_source "ensembl"; gene_biotype "protein_coding"; transcript_name "DMAC2L-203"; transcript_source "ensembl"; transcript_biotype "protein_coding";
1	StringTie	transcript	180147405	180162756	.	+	.	transcript_id "MSTRG.2633.2"; gene_id "MSTRG.2633"; xloc "XLOC_001183"; class_code "u"; tss_id "TSS2032";	1	ensembl	five_prime_utr	180075048	180075241	.	+	.	gene_id "ENSSSCG00000031354"; gene_version "3"; transcript_id "ENSSSCT00000041018"; transcript_version "3"; gene_name "DMAC2L"; gene_source "ensembl"; gene_biotype "protein_coding"; transcript_name "DMAC2L-203"; transcript_source "ensembl"; transcript_biotype "protein_coding";
1	StringTie	transcript	180147405	180162756	.	+	.	transcript_id "MSTRG.2633.2"; gene_id "MSTRG.2633"; xloc "XLOC_001183"; class_code "u"; tss_id "TSS2032";	1	ensembl	five_prime_utr	180075360	180075364	.	+	.	gene_id "ENSSSCG00000031354"; gene_version "3"; transcript_id "ENSSSCT00000041018"; transcript_version "3"; gene_name "DMAC2L"; gene_source "ensembl"; gene_biotype "protein_coding"; transcript_name "DMAC2L-203"; transcript_source "ensembl"; transcript_biotype "protein_coding";
1	StringTie	transcript	180147405	180162756	.	+	.	transcript_id "MSTRG.2633.2"; gene_id "MSTRG.2633"; xloc "XLOC_001183"; class_code "u"; tss_id "TSS2032";	1	ensembl	exon	180068973	180069307	.	+	.	gene_id "ENSSSCG00000031354"; gene_version "3"; transcript_id "ENSSSCT00000039137"; transcript_version "2"; exon_number "1"; gene_name "DMAC2L"; gene_source "ensembl"; gene_biotype "protein_coding"; transcript_name "DMAC2L-204"; transcript_source "ensembl"; transcript_biotype "protein_coding"; exon_id "ENSSSCE00000269865"; exon_version "2";
1	StringTie	transcript	180147405	180162756	.	+	.	transcript_id "MSTRG.2633.2"; gene_id "MSTRG.2633"; xloc "XLOC_001183"; class_code "u"; tss_id "TSS2032";	1	ensembl	CDS	180069172	180069307	.	+	0	gene_id "ENSSSCG00000031354"; gene_version "3"; transcript_id "ENSSSCT00000039137"; transcript_version "2"; exon_number "1"; gene_name "DMAC2L"; gene_source "ensembl"; gene_biotype "protein_coding"; transcript_name "DMAC2L-204"; transcript_source "ensembl"; transcript_biotype "protein_coding"; protein_id "ENSSSCP00000034229"; protein_version "1";
1	StringTie	transcript	180147405	180162756	.	+	.	transcript_id "MSTRG.2633.2"; gene_id "MSTRG.2633"; xloc "XLOC_001183"; class_code "u"; tss_id "TSS2032";	1	ensembl	start_codon	180069172	180069174	.	+	0	gene_id "ENSSSCG00000031354"; gene_version "3"; transcript_id "ENSSSCT00000039137"; transcript_version "2"; exon_number "1"; gene_name "DMAC2L"; gene_source "ensembl"; gene_biotype "protein_coding"; transcript_name "DMAC2L-204"; transcript_source "ensembl"; transcript_biotype "protein_coding";
1	StringTie	transcript	180147405	180162756	.	+	.	transcript_id "MSTRG.2633.2"; gene_id "MSTRG.2633"; xloc "XLOC_001183"; class_code "u"; tss_id "TSS2032";	1	ensembl	exon	180075360	180075471	.	+	.	gene_id "ENSSSCG00000031354"; gene_version "3"; transcript_id "ENSSSCT00000039137"; transcript_version "2"; exon_number "2"; gene_name "DMAC2L"; gene_source "ensembl"; gene_biotype "protein_coding"; transcript_name "DMAC2L-204"; transcript_source "ensembl"; transcript_biotype "protein_coding"; exon_id "ENSSSCE00000291804"; exon_version "1";
1	StringTie	transcript	180147405	180162756	.	+	.	transcript_id "MSTRG.2633.2"; gene_id "MSTRG.2633"; xloc "XLOC_001183"; class_code "u"; tss_id "TSS2032";	1	ensembl	CDS	180075360	180075471	.	+	2	gene_id "ENSSSCG00000031354"; gene_version "3"; transcript_id "ENSSSCT00000039137"; transcript_version "2"; exon_number "2"; gene_name "DMAC2L"; gene_source "ensembl"; gene_biotype "protein_coding"; transcript_name "DMAC2L-204"; transcript_source "ensembl"; transcript_biotype "protein_coding"; protein_id "ENSSSCP00000034229"; protein_version "1";
1	StringTie	transcript	180147405	180162756	.	+	.	transcript_id "MSTRG.2633.2"; gene_id "MSTRG.2633"; xloc "XLOC_001183"; class_code "u"; tss_id "TSS2032";	1	ensembl	five_prime_utr	180068973	180069171	.	+	.	gene_id "ENSSSCG00000031354"; gene_version "3"; transcript_id "ENSSSCT00000039137"; transcript_version "2"; gene_name "DMAC2L"; gene_source "ensembl"; gene_biotype "protein_coding"; transcript_name "DMAC2L-204"; transcript_source "ensembl"; transcript_biotype "protein_coding";
1	StringTie	transcript	180147405	180162756	.	+	.	transcript_id "MSTRG.2633.2"; gene_id "MSTRG.2633"; xloc "XLOC_001183"; class_code "u"; tss_id "TSS2032";	1	ensembl	exon	180076632	180076854	.	+	.	gene_id "ENSSSCG00000031354"; gene_version "3"; transcript_id "ENSSSCT00000094980"; transcript_version "1"; exon_number "4"; gene_name "DMAC2L"; gene_source "ensembl"; gene_biotype "protein_coding"; transcript_name "DMAC2L-201"; transcript_source "ensembl"; transcript_biotype "protein_coding"; exon_id "ENSSSCE00000511578"; exon_version "1";
1	StringTie	transcript	180147405	180162756	.	+	.	transcript_id "MSTRG.2633.2"; gene_id "MSTRG.2633"; xloc "XLOC_001183"; class_code "u"; tss_id "TSS2032";	1	ensembl	CDS	180076632	180076854	.	+	1	gene_id "ENSSSCG00000031354"; gene_version "3"; transcript_id "ENSSSCT00000094980"; transcript_version "1"; exon_number "4"; gene_name "DMAC2L"; gene_source "ensembl"; gene_biotype "protein_coding"; transcript_name "DMAC2L-201"; transcript_source "ensembl"; transcript_biotype "protein_coding"; protein_id "ENSSSCP00000080422"; protein_version "1";
1	StringTie	transcript	180147405	180162756	.	+	.	transcript_id "MSTRG.2633.2"; gene_id "MSTRG.2633"; xloc "XLOC_001183"; class_code "u"; tss_id "TSS2032";	1	ensembl	exon	180076857	180076859	.	+	.	gene_id "ENSSSCG00000031354"; gene_version "3"; transcript_id "ENSSSCT00000094980"; transcript_version "1"; exon_number "5"; gene_name "DMAC2L"; gene_source "ensembl"; gene_biotype "protein_coding"; transcript_name "DMAC2L-201"; transcript_source "ensembl"; transcript_biotype "protein_coding"; exon_id "ENSSSCE00000526550"; exon_version "1";
1	StringTie	transcript	180147405	180162756	.	+	.	transcript_id "MSTRG.2633.2"; gene_id "MSTRG.2633"; xloc "XLOC_001183"; class_code "u"; tss_id "TSS2032";	1	ensembl	CDS	180076857	180076859	.	+	0	gene_id "ENSSSCG00000031354"; gene_version "3"; transcript_id "ENSSSCT00000094980"; transcript_version "1"; exon_number "5"; gene_name "DMAC2L"; gene_source "ensembl"; gene_biotype "protein_coding"; transcript_name "DMAC2L-201"; transcript_source "ensembl"; transcript_biotype "protein_coding"; protein_id "ENSSSCP00000080422"; protein_version "1";
1	StringTie	transcript	180147405	180162756	.	+	.	transcript_id "MSTRG.2633.2"; gene_id "MSTRG.2633"; xloc "XLOC_001183"; class_code "u"; tss_id "TSS2032";	1	ensembl	exon	180076862	180076888	.	+	.	gene_id "ENSSSCG00000031354"; gene_version "3"; transcript_id "ENSSSCT00000094980"; transcript_version "1"; exon_number "6"; gene_name "DMAC2L"; gene_source "ensembl"; gene_biotype "protein_coding"; transcript_name "DMAC2L-201"; transcript_source "ensembl"; transcript_biotype "protein_coding"; exon_id "ENSSSCE00000490279"; exon_version "1";
1	StringTie	transcript	180147405	180162756	.	+	.	transcript_id "MSTRG.2633.2"; gene_id "MSTRG.2633"; xloc "XLOC_001183"; class_code "u"; tss_id "TSS2032";	1	ensembl	CDS	180076862	180076885	.	+	0	gene_id "ENSSSCG00000031354"; gene_version "3"; transcript_id "ENSSSCT00000094980"; transcript_version "1"; exon_number "6"; gene_name "DMAC2L"; gene_source "ensembl"; gene_biotype "protein_coding"; transcript_name "DMAC2L-201"; transcript_source "ensembl"; transcript_biotype "protein_coding"; protein_id "ENSSSCP00000080422"; protein_version "1";
1	StringTie	transcript	180147405	180162756	.	+	.	transcript_id "MSTRG.2633.2"; gene_id "MSTRG.2633"; xloc "XLOC_001183"; class_code "u"; tss_id "TSS2032";	1	ensembl	stop_codon	180076886	180076888	.	+	0	gene_id "ENSSSCG00000031354"; gene_version "3"; transcript_id "ENSSSCT00000094980"; transcript_version "1"; exon_number "6"; gene_name "DMAC2L"; gene_source "ensembl"; gene_biotype "protein_coding"; transcript_name "DMAC2L-201"; transcript_source "ensembl"; transcript_biotype "protein_coding";
1	StringTie	transcript	180147405	180162756	.	+	.	transcript_id "MSTRG.2633.2"; gene_id "MSTRG.2633"; xloc "XLOC_001183"; class_code "u"; tss_id "TSS2032";	1	ensembl	exon	180076632	180076840	.	+	.	gene_id "ENSSSCG00000031354"; gene_version "3"; transcript_id "ENSSSCT00000094790"; transcript_version "1"; exon_number "4"; gene_name "DMAC2L"; gene_source "ensembl"; gene_biotype "protein_coding"; transcript_name "DMAC2L-202"; transcript_source "ensembl"; transcript_biotype "protein_coding"; exon_id "ENSSSCE00000043023"; exon_version "1";
1	StringTie	transcript	180147405	180162756	.	+	.	transcript_id "MSTRG.2633.2"; gene_id "MSTRG.2633"; xloc "XLOC_001183"; class_code "u"; tss_id "TSS2032";	1	ensembl	CDS	180076632	180076840	.	+	1	gene_id "ENSSSCG00000031354"; gene_version "3"; transcript_id "ENSSSCT00000094790"; transcript_version "1"; exon_number "4"; gene_name "DMAC2L"; gene_source "ensembl"; gene_biotype "protein_coding"; transcript_name "DMAC2L-202"; transcript_source "ensembl"; transcript_biotype "protein_coding"; protein_id "ENSSSCP00000075286"; protein_version "1";
1	StringTie	transcript	180147405	180162756	.	+	.	transcript_id "MSTRG.2633.2"; gene_id "MSTRG.2633"; xloc "XLOC_001183"; class_code "u"; tss_id "TSS2032";	1	ensembl	exon	180079861	180079883	.	+	.	gene_id "ENSSSCG00000031354"; gene_version "3"; transcript_id "ENSSSCT00000094790"; transcript_version "1"; exon_number "5"; gene_name "DMAC2L"; gene_source "ensembl"; gene_biotype "protein_coding"; transcript_name "DMAC2L-202"; transcript_source "ensembl"; transcript_biotype "protein_coding"; exon_id "ENSSSCE00000515042"; exon_version "1";
1	StringTie	transcript	180147405	180162756	.	+	.	transcript_id "MSTRG.2633.2"; gene_id "MSTRG.2633"; xloc "XLOC_001183"; class_code "u"; tss_id "TSS2032";	1	ensembl	CDS	180079861	180079880	.	+	2	gene_id "ENSSSCG00000031354"; gene_version "3"; transcript_id "ENSSSCT00000094790"; transcript_version "1"; exon_number "5"; gene_name "DMAC2L"; gene_source "ensembl"; gene_biotype "protein_coding"; transcript_name "DMAC2L-202"; transcript_source "ensembl"; transcript_biotype "protein_coding"; protein_id "ENSSSCP00000075286"; protein_version "1";
1	StringTie	transcript	180147405	180162756	.	+	.	transcript_id "MSTRG.2633.2"; gene_id "MSTRG.2633"; xloc "XLOC_001183"; class_code "u"; tss_id "TSS2032";	1	ensembl	stop_codon	180079881	180079883	.	+	0	gene_id "ENSSSCG00000031354"; gene_version "3"; transcript_id "ENSSSCT00000094790"; transcript_version "1"; exon_number "5"; gene_name "DMAC2L"; gene_source "ensembl"; gene_biotype "protein_coding"; transcript_name "DMAC2L-202"; transcript_source "ensembl"; transcript_biotype "protein_coding";
1	StringTie	transcript	180147405	180162756	.	+	.	transcript_id "MSTRG.2633.2"; gene_id "MSTRG.2633"; xloc "XLOC_001183"; class_code "u"; tss_id "TSS2032";	1	ensembl	exon	180076632	180076840	.	+	.	gene_id "ENSSSCG00000031354"; gene_version "3"; transcript_id "ENSSSCT00000041018"; transcript_version "3"; exon_number "4"; gene_name "DMAC2L"; gene_source "ensembl"; gene_biotype "protein_coding"; transcript_name "DMAC2L-203"; transcript_source "ensembl"; transcript_biotype "protein_coding"; exon_id "ENSSSCE00000043023"; exon_version "1";
1	StringTie	transcript	180147405	180162756	.	+	.	transcript_id "MSTRG.2633.2"; gene_id "MSTRG.2633"; xloc "XLOC_001183"; class_code "u"; tss_id "TSS2032";	1	ensembl	CDS	180076632	180076840	.	+	1	gene_id "ENSSSCG00000031354"; gene_version "3"; transcript_id "ENSSSCT00000041018"; transcript_version "3"; exon_number "4"; gene_name "DMAC2L"; gene_source "ensembl"; gene_biotype "protein_coding"; transcript_name "DMAC2L-203"; transcript_source "ensembl"; transcript_biotype "protein_coding"; protein_id "ENSSSCP00000035990"; protein_version "1";
1	StringTie	transcript	180147405	180162756	.	+	.	transcript_id "MSTRG.2633.2"; gene_id "MSTRG.2633"; xloc "XLOC_001183"; class_code "u"; tss_id "TSS2032";	1	ensembl	exon	180077400	180077571	.	+	.	gene_id "ENSSSCG00000031354"; gene_version "3"; transcript_id "ENSSSCT00000041018"; transcript_version "3"; exon_number "5"; gene_name "DMAC2L"; gene_source "ensembl"; gene_biotype "protein_coding"; transcript_name "DMAC2L-203"; transcript_source "ensembl"; transcript_biotype "protein_coding"; exon_id "ENSSSCE00000043024"; exon_version "1";
1	StringTie	transcript	180147405	180162756	.	+	.	transcript_id "MSTRG.2633.2"; gene_id "MSTRG.2633"; xloc "XLOC_001183"; class_code "u"; tss_id "TSS2032";	1	ensembl	CDS	180077400	180077571	.	+	2	gene_id "ENSSSCG00000031354"; gene_version "3"; transcript_id "ENSSSCT00000041018"; transcript_version "3"; exon_number "5"; gene_name "DMAC2L"; gene_source "ensembl"; gene_biotype "protein_coding"; transcript_name "DMAC2L-203"; transcript_source "ensembl"; transcript_biotype "protein_coding"; protein_id "ENSSSCP00000035990"; protein_version "1";
1	StringTie	transcript	180147405	180162756	.	+	.	transcript_id "MSTRG.2633.2"; gene_id "MSTRG.2633"; xloc "XLOC_001183"; class_code "u"; tss_id "TSS2032";	1	ensembl	exon	180079861	180081404	.	+	.	gene_id "ENSSSCG00000031354"; gene_version "3"; transcript_id "ENSSSCT00000041018"; transcript_version "3"; exon_number "6"; gene_name "DMAC2L"; gene_source "ensembl"; gene_biotype "protein_coding"; transcript_name "DMAC2L-203"; transcript_source "ensembl"; transcript_biotype "protein_coding"; exon_id "ENSSSCE00000285039"; exon_version "3";
1	StringTie	transcript	180147405	180162756	.	+	.	transcript_id "MSTRG.2633.2"; gene_id "MSTRG.2633"; xloc "XLOC_001183"; class_code "u"; tss_id "TSS2032";	1	ensembl	CDS	180079861	180079972	.	+	1	gene_id "ENSSSCG00000031354"; gene_version "3"; transcript_id "ENSSSCT00000041018"; transcript_version "3"; exon_number "6"; gene_name "DMAC2L"; gene_source "ensembl"; gene_biotype "protein_coding"; transcript_name "DMAC2L-203"; transcript_source "ensembl"; transcript_biotype "protein_coding"; protein_id "ENSSSCP00000035990"; protein_version "1";
1	StringTie	transcript	180147405	180162756	.	+	.	transcript_id "MSTRG.2633.2"; gene_id "MSTRG.2633"; xloc "XLOC_001183"; class_code "u"; tss_id "TSS2032";	1	ensembl	stop_codon	180079973	180079975	.	+	0	gene_id "ENSSSCG00000031354"; gene_version "3"; transcript_id "ENSSSCT00000041018"; transcript_version "3"; exon_number "6"; gene_name "DMAC2L"; gene_source "ensembl"; gene_biotype "protein_coding"; transcript_name "DMAC2L-203"; transcript_source "ensembl"; transcript_biotype "protein_coding";
1	StringTie	transcript	180147405	180162756	.	+	.	transcript_id "MSTRG.2633.2"; gene_id "MSTRG.2633"; xloc "XLOC_001183"; class_code "u"; tss_id "TSS2032";	1	ensembl	three_prime_utr	180079976	180081404	.	+	.	gene_id "ENSSSCG00000031354"; gene_version "3"; transcript_id "ENSSSCT00000041018"; transcript_version "3"; gene_name "DMAC2L"; gene_source "ensembl"; gene_biotype "protein_coding"; transcript_name "DMAC2L-203"; transcript_source "ensembl"; transcript_biotype "protein_coding";
1	StringTie	transcript	180147405	180162756	.	+	.	transcript_id "MSTRG.2633.2"; gene_id "MSTRG.2633"; xloc "XLOC_001183"; class_code "u"; tss_id "TSS2032";	1	ensembl	exon	180076632	180076840	.	+	.	gene_id "ENSSSCG00000031354"; gene_version "3"; transcript_id "ENSSSCT00000039137"; transcript_version "2"; exon_number "3"; gene_name "DMAC2L"; gene_source "ensembl"; gene_biotype "protein_coding"; transcript_name "DMAC2L-204"; transcript_source "ensembl"; transcript_biotype "protein_coding"; exon_id "ENSSSCE00000043023"; exon_version "1";
1	StringTie	transcript	180147405	180162756	.	+	.	transcript_id "MSTRG.2633.2"; gene_id "MSTRG.2633"; xloc "XLOC_001183"; class_code "u"; tss_id "TSS2032";	1	ensembl	CDS	180076632	180076840	.	+	1	gene_id "ENSSSCG00000031354"; gene_version "3"; transcript_id "ENSSSCT00000039137"; transcript_version "2"; exon_number "3"; gene_name "DMAC2L"; gene_source "ensembl"; gene_biotype "protein_coding"; transcript_name "DMAC2L-204"; transcript_source "ensembl"; transcript_biotype "protein_coding"; protein_id "ENSSSCP00000034229"; protein_version "1";
1	StringTie	transcript	180147405	180162756	.	+	.	transcript_id "MSTRG.2633.2"; gene_id "MSTRG.2633"; xloc "XLOC_001183"; class_code "u"; tss_id "TSS2032";	1	ensembl	exon	180077400	180077571	.	+	.	gene_id "ENSSSCG00000031354"; gene_version "3"; transcript_id "ENSSSCT00000039137"; transcript_version "2"; exon_number "4"; gene_name "DMAC2L"; gene_source "ensembl"; gene_biotype "protein_coding"; transcript_name "DMAC2L-204"; transcript_source "ensembl"; transcript_biotype "protein_coding"; exon_id "ENSSSCE00000043024"; exon_version "1";
1	StringTie	transcript	180147405	180162756	.	+	.	transcript_id "MSTRG.2633.2"; gene_id "MSTRG.2633"; xloc "XLOC_001183"; class_code "u"; tss_id "TSS2032";	1	ensembl	CDS	180077400	180077571	.	+	2	gene_id "ENSSSCG00000031354"; gene_version "3"; transcript_id "ENSSSCT00000039137"; transcript_version "2"; exon_number "4"; gene_name "DMAC2L"; gene_source "ensembl"; gene_biotype "protein_coding"; transcript_name "DMAC2L-204"; transcript_source "ensembl"; transcript_biotype "protein_coding"; protein_id "ENSSSCP00000034229"; protein_version "1";
1	StringTie	transcript	180147405	180162756	.	+	.	transcript_id "MSTRG.2633.2"; gene_id "MSTRG.2633"; xloc "XLOC_001183"; class_code "u"; tss_id "TSS2032";	1	ensembl	exon	180079861	180081412	.	+	.	gene_id "ENSSSCG00000031354"; gene_version "3"; transcript_id "ENSSSCT00000039137"; transcript_version "2"; exon_number "5"; gene_name "DMAC2L"; gene_source "ensembl"; gene_biotype "protein_coding"; transcript_name "DMAC2L-204"; transcript_source "ensembl"; transcript_biotype "protein_coding"; exon_id "ENSSSCE00000294769"; exon_version "1";
1	StringTie	transcript	180147405	180162756	.	+	.	transcript_id "MSTRG.2633.2"; gene_id "MSTRG.2633"; xloc "XLOC_001183"; class_code "u"; tss_id "TSS2032";	1	ensembl	CDS	180079861	180079972	.	+	1	gene_id "ENSSSCG00000031354"; gene_version "3"; transcript_id "ENSSSCT00000039137"; transcript_version "2"; exon_number "5"; gene_name "DMAC2L"; gene_source "ensembl"; gene_biotype "protein_coding"; transcript_name "DMAC2L-204"; transcript_source "ensembl"; transcript_biotype "protein_coding"; protein_id "ENSSSCP00000034229"; protein_version "1";
1	StringTie	transcript	180147405	180162756	.	+	.	transcript_id "MSTRG.2633.2"; gene_id "MSTRG.2633"; xloc "XLOC_001183"; class_code "u"; tss_id "TSS2032";	1	ensembl	stop_codon	180079973	180079975	.	+	0	gene_id "ENSSSCG00000031354"; gene_version "3"; transcript_id "ENSSSCT00000039137"; transcript_version "2"; exon_number "5"; gene_name "DMAC2L"; gene_source "ensembl"; gene_biotype "protein_coding"; transcript_name "DMAC2L-204"; transcript_source "ensembl"; transcript_biotype "protein_coding";
1	StringTie	transcript	180147405	180162756	.	+	.	transcript_id "MSTRG.2633.2"; gene_id "MSTRG.2633"; xloc "XLOC_001183"; class_code "u"; tss_id "TSS2032";	1	ensembl	three_prime_utr	180079976	180081412	.	+	.	gene_id "ENSSSCG00000031354"; gene_version "3"; transcript_id "ENSSSCT00000039137"; transcript_version "2"; gene_name "DMAC2L"; gene_source "ensembl"; gene_biotype "protein_coding"; transcript_name "DMAC2L-204"; transcript_source "ensembl"; transcript_biotype "protein_coding";
1	StringTie	transcript	180147405	180162756	.	+	.	transcript_id "MSTRG.2633.2"; gene_id "MSTRG.2633"; xloc "XLOC_001183"; class_code "u"; tss_id "TSS2032";	1	ensembl	exon	180090603	180090685	.	-	.	gene_id "ENSSSCG00000034516"; gene_version "3"; transcript_id "ENSSSCT00000078310"; transcript_version "2"; exon_number "7"; gene_name "CDKL1"; gene_source "ensembl"; gene_biotype "protein_coding"; transcript_name "CDKL1-201"; transcript_source "ensembl"; transcript_biotype "protein_coding"; exon_id "ENSSSCE00000043029"; exon_version "1";
1	StringTie	transcript	180147405	180162756	.	+	.	transcript_id "MSTRG.2633.2"; gene_id "MSTRG.2633"; xloc "XLOC_001183"; class_code "u"; tss_id "TSS2032";	1	ensembl	CDS	180090603	180090685	.	-	2	gene_id "ENSSSCG00000034516"; gene_version "3"; transcript_id "ENSSSCT00000078310"; transcript_version "2"; exon_number "7"; gene_name "CDKL1"; gene_source "ensembl"; gene_biotype "protein_coding"; transcript_name "CDKL1-201"; transcript_source "ensembl"; transcript_biotype "protein_coding"; protein_id "ENSSSCP00000069969"; protein_version "1";
1	StringTie	transcript	180147405	180162756	.	+	.	transcript_id "MSTRG.2633.2"; gene_id "MSTRG.2633"; xloc "XLOC_001183"; class_code "u"; tss_id "TSS2032";	1	ensembl	exon	180087569	180087625	.	-	.	gene_id "ENSSSCG00000034516"; gene_version "3"; transcript_id "ENSSSCT00000078310"; transcript_version "2"; exon_number "8"; gene_name "CDKL1"; gene_source "ensembl"; gene_biotype "protein_coding"; transcript_name "CDKL1-201"; transcript_source "ensembl"; transcript_biotype "protein_coding"; exon_id "ENSSSCE00000043030"; exon_version "1";
1	StringTie	transcript	180147405	180162756	.	+	.	transcript_id "MSTRG.2633.2"; gene_id "MSTRG.2633"; xloc "XLOC_001183"; class_code "u"; tss_id "TSS2032";	1	ensembl	CDS	180087569	180087625	.	-	0	gene_id "ENSSSCG00000034516"; gene_version "3"; transcript_id "ENSSSCT00000078310"; transcript_version "2"; exon_number "8"; gene_name "CDKL1"; gene_source "ensembl"; gene_biotype "protein_coding"; transcript_name "CDKL1-201"; transcript_source "ensembl"; transcript_biotype "protein_coding"; protein_id "ENSSSCP00000069969"; protein_version "1";
1	StringTie	transcript	180147405	180162756	.	+	.	transcript_id "MSTRG.2633.2"; gene_id "MSTRG.2633"; xloc "XLOC_001183"; class_code "u"; tss_id "TSS2032";	1	ensembl	exon	180086641	180086649	.	-	.	gene_id "ENSSSCG00000034516"; gene_version "3"; transcript_id "ENSSSCT00000078310"; transcript_version "2"; exon_number "9"; gene_name "CDKL1"; gene_source "ensembl"; gene_biotype "protein_coding"; transcript_name "CDKL1-201"; transcript_source "ensembl"; transcript_biotype "protein_coding"; exon_id "ENSSSCE00000491868"; exon_version "1";
1	StringTie	transcript	180147405	180162756	.	+	.	transcript_id "MSTRG.2633.2"; gene_id "MSTRG.2633"; xloc "XLOC_001183"; class_code "u"; tss_id "TSS2032";	1	ensembl	CDS	180086641	180086649	.	-	0	gene_id "ENSSSCG00000034516"; gene_version "3"; transcript_id "ENSSSCT00000078310"; transcript_version "2"; exon_number "9"; gene_name "CDKL1"; gene_source "ensembl"; gene_biotype "protein_coding"; transcript_name "CDKL1-201"; transcript_source "ensembl"; transcript_biotype "protein_coding"; protein_id "ENSSSCP00000069969"; protein_version "1";
1	StringTie	transcript	180147405	180162756	.	+	.	transcript_id "MSTRG.2633.2"; gene_id "MSTRG.2633"; xloc "XLOC_001183"; class_code "u"; tss_id "TSS2032";	1	ensembl	exon	180086618	180086638	.	-	.	gene_id "ENSSSCG00000034516"; gene_version "3"; transcript_id "ENSSSCT00000078310"; transcript_version "2"; exon_number "10"; gene_name "CDKL1"; gene_source "ensembl"; gene_biotype "protein_coding"; transcript_name "CDKL1-201"; transcript_source "ensembl"; transcript_biotype "protein_coding"; exon_id "ENSSSCE00000419092"; exon_version "1";
1	StringTie	transcript	180147405	180162756	.	+	.	transcript_id "MSTRG.2633.2"; gene_id "MSTRG.2633"; xloc "XLOC_001183"; class_code "u"; tss_id "TSS2032";	1	ensembl	CDS	180086618	180086638	.	-	0	gene_id "ENSSSCG00000034516"; gene_version "3"; transcript_id "ENSSSCT00000078310"; transcript_version "2"; exon_number "10"; gene_name "CDKL1"; gene_source "ensembl"; gene_biotype "protein_coding"; transcript_name "CDKL1-201"; transcript_source "ensembl"; transcript_biotype "protein_coding"; protein_id "ENSSSCP00000069969"; protein_version "1";
1	StringTie	transcript	180147405	180162756	.	+	.	transcript_id "MSTRG.2633.2"; gene_id "MSTRG.2633"; xloc "XLOC_001183"; class_code "u"; tss_id "TSS2032";	1	ensembl	exon	180090603	180090685	.	-	.	gene_id "ENSSSCG00000034516"; gene_version "3"; transcript_id "ENSSSCT00000075014"; transcript_version "2"; exon_number "7"; gene_name "CDKL1"; gene_source "ensembl"; gene_biotype "protein_coding"; transcript_name "CDKL1-202"; transcript_source "ensembl"; transcript_biotype "protein_coding"; exon_id "ENSSSCE00000043029"; exon_version "1";
1	StringTie	transcript	180147405	180162756	.	+	.	transcript_id "MSTRG.2633.2"; gene_id "MSTRG.2633"; xloc "XLOC_001183"; class_code "u"; tss_id "TSS2032";	1	ensembl	CDS	180090603	180090685	.	-	2	gene_id "ENSSSCG00000034516"; gene_version "3"; transcript_id "ENSSSCT00000075014"; transcript_version "2"; exon_number "7"; gene_name "CDKL1"; gene_source "ensembl"; gene_biotype "protein_coding"; transcript_name "CDKL1-202"; transcript_source "ensembl"; transcript_biotype "protein_coding"; protein_id "ENSSSCP00000071907"; protein_version "2";
1	StringTie	transcript	180147405	180162756	.	+	.	transcript_id "MSTRG.2633.2"; gene_id "MSTRG.2633"; xloc "XLOC_001183"; class_code "u"; tss_id "TSS2032";	1	ensembl	exon	180087569	180087625	.	-	.	gene_id "ENSSSCG00000034516"; gene_version "3"; transcript_id "ENSSSCT00000075014"; transcript_version "2"; exon_number "8"; gene_name "CDKL1"; gene_source "ensembl"; gene_biotype "protein_coding"; transcript_name "CDKL1-202"; transcript_source "ensembl"; transcript_biotype "protein_coding"; exon_id "ENSSSCE00000043030"; exon_version "1";
1	StringTie	transcript	180147405	180162756	.	+	.	transcript_id "MSTRG.2633.2"; gene_id "MSTRG.2633"; xloc "XLOC_001183"; class_code "u"; tss_id "TSS2032";	1	ensembl	CDS	180087569	180087625	.	-	0	gene_id "ENSSSCG00000034516"; gene_version "3"; transcript_id "ENSSSCT00000075014"; transcript_version "2"; exon_number "8"; gene_name "CDKL1"; gene_source "ensembl"; gene_biotype "protein_coding"; transcript_name "CDKL1-202"; transcript_source "ensembl"; transcript_biotype "protein_coding"; protein_id "ENSSSCP00000071907"; protein_version "2";
1	StringTie	transcript	180147405	180162756	.	+	.	transcript_id "MSTRG.2633.2"; gene_id "MSTRG.2633"; xloc "XLOC_001183"; class_code "u"; tss_id "TSS2032";	1	ensembl	exon	180086222	180086369	.	-	.	gene_id "ENSSSCG00000034516"; gene_version "3"; transcript_id "ENSSSCT00000075014"; transcript_version "2"; exon_number "9"; gene_name "CDKL1"; gene_source "ensembl"; gene_biotype "protein_coding"; transcript_name "CDKL1-202"; transcript_source "ensembl"; transcript_biotype "protein_coding"; exon_id "ENSSSCE00000414812"; exon_version "2";
1	StringTie	transcript	180147405	180162756	.	+	.	transcript_id "MSTRG.2633.2"; gene_id "MSTRG.2633"; xloc "XLOC_001183"; class_code "u"; tss_id "TSS2032";	1	ensembl	CDS	180086222	180086369	.	-	0	gene_id "ENSSSCG00000034516"; gene_version "3"; transcript_id "ENSSSCT00000075014"; transcript_version "2"; exon_number "9"; gene_name "CDKL1"; gene_source "ensembl"; gene_biotype "protein_coding"; transcript_name "CDKL1-202"; transcript_source "ensembl"; transcript_biotype "protein_coding"; protein_id "ENSSSCP00000071907"; protein_version "2";
1	StringTie	transcript	180147405	180162756	.	+	.	transcript_id "MSTRG.2633.2"; gene_id "MSTRG.2633"; xloc "XLOC_001183"; class_code "u"; tss_id "TSS2032";	1	ensembl	exon	180086178	180086200	.	-	.	gene_id "ENSSSCG00000034516"; gene_version "3"; transcript_id "ENSSSCT00000075014"; transcript_version "2"; exon_number "10"; gene_name "CDKL1"; gene_source "ensembl"; gene_biotype "protein_coding"; transcript_name "CDKL1-202"; transcript_source "ensembl"; transcript_biotype "protein_coding"; exon_id "ENSSSCE00000429433"; exon_version "2";
1	StringTie	transcript	180147405	180162756	.	+	.	transcript_id "MSTRG.2633.2"; gene_id "MSTRG.2633"; xloc "XLOC_001183"; class_code "u"; tss_id "TSS2032";	1	ensembl	CDS	180086178	180086200	.	-	2	gene_id "ENSSSCG00000034516"; gene_version "3"; transcript_id "ENSSSCT00000075014"; transcript_version "2"; exon_number "10"; gene_name "CDKL1"; gene_source "ensembl"; gene_biotype "protein_coding"; transcript_name "CDKL1-202"; transcript_source "ensembl"; transcript_biotype "protein_coding"; protein_id "ENSSSCP00000071907"; protein_version "2";
1	StringTie	transcript	180147405	180162756	.	+	.	transcript_id "MSTRG.2633.2"; gene_id "MSTRG.2633"; xloc "XLOC_001183"; class_code "u"; tss_id "TSS2032";	1	ensembl	exon	180084102	180084209	.	-	.	gene_id "ENSSSCG00000034516"; gene_version "3"; transcript_id "ENSSSCT00000075014"; transcript_version "2"; exon_number "11"; gene_name "CDKL1"; gene_source "ensembl"; gene_biotype "protein_coding"; transcript_name "CDKL1-202"; transcript_source "ensembl"; transcript_biotype "protein_coding"; exon_id "ENSSSCE00000409717"; exon_version "1";
1	StringTie	transcript	180147405	180162756	.	+	.	transcript_id "MSTRG.2633.2"; gene_id "MSTRG.2633"; xloc "XLOC_001183"; class_code "u"; tss_id "TSS2032";	1	ensembl	CDS	180084105	180084209	.	-	0	gene_id "ENSSSCG00000034516"; gene_version "3"; transcript_id "ENSSSCT00000075014"; transcript_version "2"; exon_number "11"; gene_name "CDKL1"; gene_source "ensembl"; gene_biotype "protein_coding"; transcript_name "CDKL1-202"; transcript_source "ensembl"; transcript_biotype "protein_coding"; protein_id "ENSSSCP00000071907"; protein_version "2";
1	StringTie	transcript	180147405	180162756	.	+	.	transcript_id "MSTRG.2633.2"; gene_id "MSTRG.2633"; xloc "XLOC_001183"; class_code "u"; tss_id "TSS2032";	1	ensembl	stop_codon	180084102	180084104	.	-	0	gene_id "ENSSSCG00000034516"; gene_version "3"; transcript_id "ENSSSCT00000075014"; transcript_version "2"; exon_number "11"; gene_name "CDKL1"; gene_source "ensembl"; gene_biotype "protein_coding"; transcript_name "CDKL1-202"; transcript_source "ensembl"; transcript_biotype "protein_coding";
1	StringTie	transcript	180147405	180162756	.	+	.	transcript_id "MSTRG.2633.2"; gene_id "MSTRG.2633"; xloc "XLOC_001183"; class_code "u"; tss_id "TSS2032";	1	ensembl	exon	180090603	180090685	.	-	.	gene_id "ENSSSCG00000034516"; gene_version "3"; transcript_id "ENSSSCT00000061065"; transcript_version "2"; exon_number "7"; gene_name "CDKL1"; gene_source "ensembl"; gene_biotype "protein_coding"; transcript_name "CDKL1-203"; transcript_source "ensembl"; transcript_biotype "protein_coding"; exon_id "ENSSSCE00000043029"; exon_version "1";
1	StringTie	transcript	180147405	180162756	.	+	.	transcript_id "MSTRG.2633.2"; gene_id "MSTRG.2633"; xloc "XLOC_001183"; class_code "u"; tss_id "TSS2032";	1	ensembl	CDS	180090603	180090685	.	-	2	gene_id "ENSSSCG00000034516"; gene_version "3"; transcript_id "ENSSSCT00000061065"; transcript_version "2"; exon_number "7"; gene_name "CDKL1"; gene_source "ensembl"; gene_biotype "protein_coding"; transcript_name "CDKL1-203"; transcript_source "ensembl"; transcript_biotype "protein_coding"; protein_id "ENSSSCP00000036467"; protein_version "1";
1	StringTie	transcript	180147405	180162756	.	+	.	transcript_id "MSTRG.2633.2"; gene_id "MSTRG.2633"; xloc "XLOC_001183"; class_code "u"; tss_id "TSS2032";	1	ensembl	exon	180087569	180087625	.	-	.	gene_id "ENSSSCG00000034516"; gene_version "3"; transcript_id "ENSSSCT00000061065"; transcript_version "2"; exon_number "8"; gene_name "CDKL1"; gene_source "ensembl"; gene_biotype "protein_coding"; transcript_name "CDKL1-203"; transcript_source "ensembl"; transcript_biotype "protein_coding"; exon_id "ENSSSCE00000043030"; exon_version "1";
1	StringTie	transcript	180147405	180162756	.	+	.	transcript_id "MSTRG.2633.2"; gene_id "MSTRG.2633"; xloc "XLOC_001183"; class_code "u"; tss_id "TSS2032";	1	ensembl	CDS	180087569	180087625	.	-	0	gene_id "ENSSSCG00000034516"; gene_version "3"; transcript_id "ENSSSCT00000061065"; transcript_version "2"; exon_number "8"; gene_name "CDKL1"; gene_source "ensembl"; gene_biotype "protein_coding"; transcript_name "CDKL1-203"; transcript_source "ensembl"; transcript_biotype "protein_coding"; protein_id "ENSSSCP00000036467"; protein_version "1";
1	StringTie	transcript	180147405	180162756	.	+	.	transcript_id "MSTRG.2633.2"; gene_id "MSTRG.2633"; xloc "XLOC_001183"; class_code "u"; tss_id "TSS2032";	1	ensembl	exon	180086214	180086369	.	-	.	gene_id "ENSSSCG00000034516"; gene_version "3"; transcript_id "ENSSSCT00000061065"; transcript_version "2"; exon_number "9"; gene_name "CDKL1"; gene_source "ensembl"; gene_biotype "protein_coding"; transcript_name "CDKL1-203"; transcript_source "ensembl"; transcript_biotype "protein_coding"; exon_id "ENSSSCE00000043031"; exon_version "1";
1	StringTie	transcript	180147405	180162756	.	+	.	transcript_id "MSTRG.2633.2"; gene_id "MSTRG.2633"; xloc "XLOC_001183"; class_code "u"; tss_id "TSS2032";	1	ensembl	CDS	180086214	180086369	.	-	0	gene_id "ENSSSCG00000034516"; gene_version "3"; transcript_id "ENSSSCT00000061065"; transcript_version "2"; exon_number "9"; gene_name "CDKL1"; gene_source "ensembl"; gene_biotype "protein_coding"; transcript_name "CDKL1-203"; transcript_source "ensembl"; transcript_biotype "protein_coding"; protein_id "ENSSSCP00000036467"; protein_version "1";
1	StringTie	transcript	180147405	180162756	.	+	.	transcript_id "MSTRG.2633.2"; gene_id "MSTRG.2633"; xloc "XLOC_001183"; class_code "u"; tss_id "TSS2032";	1	ensembl	exon	180079859	180084209	.	-	.	gene_id "ENSSSCG00000034516"; gene_version "3"; transcript_id "ENSSSCT00000061065"; transcript_version "2"; exon_number "10"; gene_name "CDKL1"; gene_source "ensembl"; gene_biotype "protein_coding"; transcript_name "CDKL1-203"; transcript_source "ensembl"; transcript_biotype "protein_coding"; exon_id "ENSSSCE00000312854"; exon_version "2";
1	StringTie	transcript	180147405	180162756	.	+	.	transcript_id "MSTRG.2633.2"; gene_id "MSTRG.2633"; xloc "XLOC_001183"; class_code "u"; tss_id "TSS2032";	1	ensembl	CDS	180084105	180084209	.	-	0	gene_id "ENSSSCG00000034516"; gene_version "3"; transcript_id "ENSSSCT00000061065"; transcript_version "2"; exon_number "10"; gene_name "CDKL1"; gene_source "ensembl"; gene_biotype "protein_coding"; transcript_name "CDKL1-203"; transcript_source "ensembl"; transcript_biotype "protein_coding"; protein_id "ENSSSCP00000036467"; protein_version "1";
1	StringTie	transcript	180147405	180162756	.	+	.	transcript_id "MSTRG.2633.2"; gene_id "MSTRG.2633"; xloc "XLOC_001183"; class_code "u"; tss_id "TSS2032";	1	ensembl	stop_codon	180084102	180084104	.	-	0	gene_id "ENSSSCG00000034516"; gene_version "3"; transcript_id "ENSSSCT00000061065"; transcript_version "2"; exon_number "10"; gene_name "CDKL1"; gene_source "ensembl"; gene_biotype "protein_coding"; transcript_name "CDKL1-203"; transcript_source "ensembl"; transcript_biotype "protein_coding";
1	StringTie	transcript	180147405	180162756	.	+	.	transcript_id "MSTRG.2633.2"; gene_id "MSTRG.2633"; xloc "XLOC_001183"; class_code "u"; tss_id "TSS2032";	1	ensembl	exon	180078659	180079747	.	-	.	gene_id "ENSSSCG00000034516"; gene_version "3"; transcript_id "ENSSSCT00000061065"; transcript_version "2"; exon_number "11"; gene_name "CDKL1"; gene_source "ensembl"; gene_biotype "protein_coding"; transcript_name "CDKL1-203"; transcript_source "ensembl"; transcript_biotype "protein_coding"; exon_id "ENSSSCE00000414625"; exon_version "1";
1	StringTie	transcript	180147405	180162756	.	+	.	transcript_id "MSTRG.2633.2"; gene_id "MSTRG.2633"; xloc "XLOC_001183"; class_code "u"; tss_id "TSS2032";	1	ensembl	three_prime_utr	180079859	180084101	.	-	.	gene_id "ENSSSCG00000034516"; gene_version "3"; transcript_id "ENSSSCT00000061065"; transcript_version "2"; gene_name "CDKL1"; gene_source "ensembl"; gene_biotype "protein_coding"; transcript_name "CDKL1-203"; transcript_source "ensembl"; transcript_biotype "protein_coding";
1	StringTie	transcript	180147405	180162756	.	+	.	transcript_id "MSTRG.2633.2"; gene_id "MSTRG.2633"; xloc "XLOC_001183"; class_code "u"; tss_id "TSS2032";	1	ensembl	three_prime_utr	180078659	180079747	.	-	.	gene_id "ENSSSCG00000034516"; gene_version "3"; transcript_id "ENSSSCT00000061065"; transcript_version "2"; gene_name "CDKL1"; gene_source "ensembl"; gene_biotype "protein_coding"; transcript_name "CDKL1-203"; transcript_source "ensembl"; transcript_biotype "protein_coding";
1	StringTie	transcript	180147405	180162756	.	+	.	transcript_id "MSTRG.2633.2"; gene_id "MSTRG.2633"; xloc "XLOC_001183"; class_code "u"; tss_id "TSS2032";	1	ensembl	exon	180097790	180097862	.	-	.	gene_id "ENSSSCG00000034516"; gene_version "3"; transcript_id "ENSSSCT00000078310"; transcript_version "2"; exon_number "4"; gene_name "CDKL1"; gene_source "ensembl"; gene_biotype "protein_coding"; transcript_name "CDKL1-201"; transcript_source "ensembl"; transcript_biotype "protein_coding"; exon_id "ENSSSCE00000043026"; exon_version "2";
1	StringTie	transcript	180147405	180162756	.	+	.	transcript_id "MSTRG.2633.2"; gene_id "MSTRG.2633"; xloc "XLOC_001183"; class_code "u"; tss_id "TSS2032";	1	ensembl	CDS	180097790	180097862	.	-	1	gene_id "ENSSSCG00000034516"; gene_version "3"; transcript_id "ENSSSCT00000078310"; transcript_version "2"; exon_number "4"; gene_name "CDKL1"; gene_source "ensembl"; gene_biotype "protein_coding"; transcript_name "CDKL1-201"; transcript_source "ensembl"; transcript_biotype "protein_coding"; protein_id "ENSSSCP00000069969"; protein_version "1";
1	StringTie	transcript	180147405	180162756	.	+	.	transcript_id "MSTRG.2633.2"; gene_id "MSTRG.2633"; xloc "XLOC_001183"; class_code "u"; tss_id "TSS2032";	1	ensembl	exon	180095396	180095486	.	-	.	gene_id "ENSSSCG00000034516"; gene_version "3"; transcript_id "ENSSSCT00000078310"; transcript_version "2"; exon_number "5"; gene_name "CDKL1"; gene_source "ensembl"; gene_biotype "protein_coding"; transcript_name "CDKL1-201"; transcript_source "ensembl"; transcript_biotype "protein_coding"; exon_id "ENSSSCE00000043027"; exon_version "1";
1	StringTie	transcript	180147405	180162756	.	+	.	transcript_id "MSTRG.2633.2"; gene_id "MSTRG.2633"; xloc "XLOC_001183"; class_code "u"; tss_id "TSS2032";	1	ensembl	CDS	180095396	180095486	.	-	0	gene_id "ENSSSCG00000034516"; gene_version "3"; transcript_id "ENSSSCT00000078310"; transcript_version "2"; exon_number "5"; gene_name "CDKL1"; gene_source "ensembl"; gene_biotype "protein_coding"; transcript_name "CDKL1-201"; transcript_source "ensembl"; transcript_biotype "protein_coding"; protein_id "ENSSSCP00000069969"; protein_version "1";
1	StringTie	transcript	180147405	180162756	.	+	.	transcript_id "MSTRG.2633.2"; gene_id "MSTRG.2633"; xloc "XLOC_001183"; class_code "u"; tss_id "TSS2032";	1	ensembl	exon	180097790	180097862	.	-	.	gene_id "ENSSSCG00000034516"; gene_version "3"; transcript_id "ENSSSCT00000075014"; transcript_version "2"; exon_number "4"; gene_name "CDKL1"; gene_source "ensembl"; gene_biotype "protein_coding"; transcript_name "CDKL1-202"; transcript_source "ensembl"; transcript_biotype "protein_coding"; exon_id "ENSSSCE00000043026"; exon_version "2";
1	StringTie	transcript	180147405	180162756	.	+	.	transcript_id "MSTRG.2633.2"; gene_id "MSTRG.2633"; xloc "XLOC_001183"; class_code "u"; tss_id "TSS2032";	1	ensembl	CDS	180097790	180097862	.	-	1	gene_id "ENSSSCG00000034516"; gene_version "3"; transcript_id "ENSSSCT00000075014"; transcript_version "2"; exon_number "4"; gene_name "CDKL1"; gene_source "ensembl"; gene_biotype "protein_coding"; transcript_name "CDKL1-202"; transcript_source "ensembl"; transcript_biotype "protein_coding"; protein_id "ENSSSCP00000071907"; protein_version "2";
1	StringTie	transcript	180147405	180162756	.	+	.	transcript_id "MSTRG.2633.2"; gene_id "MSTRG.2633"; xloc "XLOC_001183"; class_code "u"; tss_id "TSS2032";	1	ensembl	exon	180095396	180095486	.	-	.	gene_id "ENSSSCG00000034516"; gene_version "3"; transcript_id "ENSSSCT00000075014"; transcript_version "2"; exon_number "5"; gene_name "CDKL1"; gene_source "ensembl"; gene_biotype "protein_coding"; transcript_name "CDKL1-202"; transcript_source "ensembl"; transcript_biotype "protein_coding"; exon_id "ENSSSCE00000043027"; exon_version "1";
1	StringTie	transcript	180147405	180162756	.	+	.	transcript_id "MSTRG.2633.2"; gene_id "MSTRG.2633"; xloc "XLOC_001183"; class_code "u"; tss_id "TSS2032";	1	ensembl	CDS	180095396	180095486	.	-	0	gene_id "ENSSSCG00000034516"; gene_version "3"; transcript_id "ENSSSCT00000075014"; transcript_version "2"; exon_number "5"; gene_name "CDKL1"; gene_source "ensembl"; gene_biotype "protein_coding"; transcript_name "CDKL1-202"; transcript_source "ensembl"; transcript_biotype "protein_coding"; protein_id "ENSSSCP00000071907"; protein_version "2";
1	StringTie	transcript	180147405	180162756	.	+	.	transcript_id "MSTRG.2633.2"; gene_id "MSTRG.2633"; xloc "XLOC_001183"; class_code "u"; tss_id "TSS2032";	1	ensembl	exon	180097790	180097862	.	-	.	gene_id "ENSSSCG00000034516"; gene_version "3"; transcript_id "ENSSSCT00000061065"; transcript_version "2"; exon_number "4"; gene_name "CDKL1"; gene_source "ensembl"; gene_biotype "protein_coding"; transcript_name "CDKL1-203"; transcript_source "ensembl"; transcript_biotype "protein_coding"; exon_id "ENSSSCE00000043026"; exon_version "2";
1	StringTie	transcript	180147405	180162756	.	+	.	transcript_id "MSTRG.2633.2"; gene_id "MSTRG.2633"; xloc "XLOC_001183"; class_code "u"; tss_id "TSS2032";	1	ensembl	CDS	180097790	180097862	.	-	1	gene_id "ENSSSCG00000034516"; gene_version "3"; transcript_id "ENSSSCT00000061065"; transcript_version "2"; exon_number "4"; gene_name "CDKL1"; gene_source "ensembl"; gene_biotype "protein_coding"; transcript_name "CDKL1-203"; transcript_source "ensembl"; transcript_biotype "protein_coding"; protein_id "ENSSSCP00000036467"; protein_version "1";
1	StringTie	transcript	180147405	180162756	.	+	.	transcript_id "MSTRG.2633.2"; gene_id "MSTRG.2633"; xloc "XLOC_001183"; class_code "u"; tss_id "TSS2032";	1	ensembl	exon	180095396	180095486	.	-	.	gene_id "ENSSSCG00000034516"; gene_version "3"; transcript_id "ENSSSCT00000061065"; transcript_version "2"; exon_number "5"; gene_name "CDKL1"; gene_source "ensembl"; gene_biotype "protein_coding"; transcript_name "CDKL1-203"; transcript_source "ensembl"; transcript_biotype "protein_coding"; exon_id "ENSSSCE00000043027"; exon_version "1";
1	StringTie	transcript	180147405	180162756	.	+	.	transcript_id "MSTRG.2633.2"; gene_id "MSTRG.2633"; xloc "XLOC_001183"; class_code "u"; tss_id "TSS2032";	1	ensembl	CDS	180095396	180095486	.	-	0	gene_id "ENSSSCG00000034516"; gene_version "3"; transcript_id "ENSSSCT00000061065"; transcript_version "2"; exon_number "5"; gene_name "CDKL1"; gene_source "ensembl"; gene_biotype "protein_coding"; transcript_name "CDKL1-203"; transcript_source "ensembl"; transcript_biotype "protein_coding"; protein_id "ENSSSCP00000036467"; protein_version "1";
1	StringTie	transcript	180147405	180162756	.	+	.	transcript_id "MSTRG.2633.2"; gene_id "MSTRG.2633"; xloc "XLOC_001183"; class_code "u"; tss_id "TSS2032";	1	ensembl	exon	180109574	180109695	.	-	.	gene_id "ENSSSCG00000034516"; gene_version "3"; transcript_id "ENSSSCT00000078310"; transcript_version "2"; exon_number "3"; gene_name "CDKL1"; gene_source "ensembl"; gene_biotype "protein_coding"; transcript_name "CDKL1-201"; transcript_source "ensembl"; transcript_biotype "protein_coding"; exon_id "ENSSSCE00000299988"; exon_version "1";
1	StringTie	transcript	180147405	180162756	.	+	.	transcript_id "MSTRG.2633.2"; gene_id "MSTRG.2633"; xloc "XLOC_001183"; class_code "u"; tss_id "TSS2032";	1	ensembl	CDS	180109574	180109695	.	-	0	gene_id "ENSSSCG00000034516"; gene_version "3"; transcript_id "ENSSSCT00000078310"; transcript_version "2"; exon_number "3"; gene_name "CDKL1"; gene_source "ensembl"; gene_biotype "protein_coding"; transcript_name "CDKL1-201"; transcript_source "ensembl"; transcript_biotype "protein_coding"; protein_id "ENSSSCP00000069969"; protein_version "1";
1	StringTie	transcript	180147405	180162756	.	+	.	transcript_id "MSTRG.2633.2"; gene_id "MSTRG.2633"; xloc "XLOC_001183"; class_code "u"; tss_id "TSS2032";	1	ensembl	exon	180109574	180109695	.	-	.	gene_id "ENSSSCG00000034516"; gene_version "3"; transcript_id "ENSSSCT00000075014"; transcript_version "2"; exon_number "3"; gene_name "CDKL1"; gene_source "ensembl"; gene_biotype "protein_coding"; transcript_name "CDKL1-202"; transcript_source "ensembl"; transcript_biotype "protein_coding"; exon_id "ENSSSCE00000299988"; exon_version "1";
1	StringTie	transcript	180147405	180162756	.	+	.	transcript_id "MSTRG.2633.2"; gene_id "MSTRG.2633"; xloc "XLOC_001183"; class_code "u"; tss_id "TSS2032";	1	ensembl	CDS	180109574	180109695	.	-	0	gene_id "ENSSSCG00000034516"; gene_version "3"; transcript_id "ENSSSCT00000075014"; transcript_version "2"; exon_number "3"; gene_name "CDKL1"; gene_source "ensembl"; gene_biotype "protein_coding"; transcript_name "CDKL1-202"; transcript_source "ensembl"; transcript_biotype "protein_coding"; protein_id "ENSSSCP00000071907"; protein_version "2";
1	StringTie	transcript	180147405	180162756	.	+	.	transcript_id "MSTRG.2633.2"; gene_id "MSTRG.2633"; xloc "XLOC_001183"; class_code "u"; tss_id "TSS2032";	1	ensembl	exon	180109574	180109695	.	-	.	gene_id "ENSSSCG00000034516"; gene_version "3"; transcript_id "ENSSSCT00000061065"; transcript_version "2"; exon_number "3"; gene_name "CDKL1"; gene_source "ensembl"; gene_biotype "protein_coding"; transcript_name "CDKL1-203"; transcript_source "ensembl"; transcript_biotype "protein_coding"; exon_id "ENSSSCE00000299988"; exon_version "1";
1	StringTie	transcript	180147405	180162756	.	+	.	transcript_id "MSTRG.2633.2"; gene_id "MSTRG.2633"; xloc "XLOC_001183"; class_code "u"; tss_id "TSS2032";	1	ensembl	CDS	180109574	180109695	.	-	0	gene_id "ENSSSCG00000034516"; gene_version "3"; transcript_id "ENSSSCT00000061065"; transcript_version "2"; exon_number "3"; gene_name "CDKL1"; gene_source "ensembl"; gene_biotype "protein_coding"; transcript_name "CDKL1-203"; transcript_source "ensembl"; transcript_biotype "protein_coding"; protein_id "ENSSSCP00000036467"; protein_version "1";
1	StringTie	transcript	180147405	180162756	.	+	.	transcript_id "MSTRG.2633.2"; gene_id "MSTRG.2633"; xloc "XLOC_001183"; class_code "u"; tss_id "TSS2032";	1	ensembl	exon	180144993	180145054	.	-	.	gene_id "ENSSSCG00000034516"; gene_version "3"; transcript_id "ENSSSCT00000078310"; transcript_version "2"; exon_number "1"; gene_name "CDKL1"; gene_source "ensembl"; gene_biotype "protein_coding"; transcript_name "CDKL1-201"; transcript_source "ensembl"; transcript_biotype "protein_coding"; exon_id "ENSSSCE00000333614"; exon_version "3";
1	StringTie	transcript	180147405	180162756	.	+	.	transcript_id "MSTRG.2633.2"; gene_id "MSTRG.2633"; xloc "XLOC_001183"; class_code "u"; tss_id "TSS2032";	1	ensembl	exon	180144472	180144757	.	-	.	gene_id "ENSSSCG00000034516"; gene_version "3"; transcript_id "ENSSSCT00000078310"; transcript_version "2"; exon_number "2"; gene_name "CDKL1"; gene_source "ensembl"; gene_biotype "protein_coding"; transcript_name "CDKL1-201"; transcript_source "ensembl"; transcript_biotype "protein_coding"; exon_id "ENSSSCE00000308455"; exon_version "1";
1	StringTie	transcript	180147405	180162756	.	+	.	transcript_id "MSTRG.2633.2"; gene_id "MSTRG.2633"; xloc "XLOC_001183"; class_code "u"; tss_id "TSS2032";	1	ensembl	CDS	180144472	180144642	.	-	0	gene_id "ENSSSCG00000034516"; gene_version "3"; transcript_id "ENSSSCT00000078310"; transcript_version "2"; exon_number "2"; gene_name "CDKL1"; gene_source "ensembl"; gene_biotype "protein_coding"; transcript_name "CDKL1-201"; transcript_source "ensembl"; transcript_biotype "protein_coding"; protein_id "ENSSSCP00000069969"; protein_version "1";
1	StringTie	transcript	180147405	180162756	.	+	.	transcript_id "MSTRG.2633.2"; gene_id "MSTRG.2633"; xloc "XLOC_001183"; class_code "u"; tss_id "TSS2032";	1	ensembl	five_prime_utr	180144993	180145054	.	-	.	gene_id "ENSSSCG00000034516"; gene_version "3"; transcript_id "ENSSSCT00000078310"; transcript_version "2"; gene_name "CDKL1"; gene_source "ensembl"; gene_biotype "protein_coding"; transcript_name "CDKL1-201"; transcript_source "ensembl"; transcript_biotype "protein_coding";
1	StringTie	transcript	180147405	180162756	.	+	.	transcript_id "MSTRG.2633.2"; gene_id "MSTRG.2633"; xloc "XLOC_001183"; class_code "u"; tss_id "TSS2032";	1	ensembl	five_prime_utr	180144643	180144757	.	-	.	gene_id "ENSSSCG00000034516"; gene_version "3"; transcript_id "ENSSSCT00000078310"; transcript_version "2"; gene_name "CDKL1"; gene_source "ensembl"; gene_biotype "protein_coding"; transcript_name "CDKL1-201"; transcript_source "ensembl"; transcript_biotype "protein_coding";
1	StringTie	transcript	180147405	180162756	.	+	.	transcript_id "MSTRG.2633.2"; gene_id "MSTRG.2633"; xloc "XLOC_001183"; class_code "u"; tss_id "TSS2032";	1	ensembl	exon	180144993	180145054	.	-	.	gene_id "ENSSSCG00000034516"; gene_version "3"; transcript_id "ENSSSCT00000075014"; transcript_version "2"; exon_number "1"; gene_name "CDKL1"; gene_source "ensembl"; gene_biotype "protein_coding"; transcript_name "CDKL1-202"; transcript_source "ensembl"; transcript_biotype "protein_coding"; exon_id "ENSSSCE00000333614"; exon_version "3";
1	StringTie	transcript	180147405	180162756	.	+	.	transcript_id "MSTRG.2633.2"; gene_id "MSTRG.2633"; xloc "XLOC_001183"; class_code "u"; tss_id "TSS2032";	1	ensembl	exon	180144472	180144757	.	-	.	gene_id "ENSSSCG00000034516"; gene_version "3"; transcript_id "ENSSSCT00000075014"; transcript_version "2"; exon_number "2"; gene_name "CDKL1"; gene_source "ensembl"; gene_biotype "protein_coding"; transcript_name "CDKL1-202"; transcript_source "ensembl"; transcript_biotype "protein_coding"; exon_id "ENSSSCE00000308455"; exon_version "1";
1	StringTie	transcript	180147405	180162756	.	+	.	transcript_id "MSTRG.2633.2"; gene_id "MSTRG.2633"; xloc "XLOC_001183"; class_code "u"; tss_id "TSS2032";	1	ensembl	CDS	180144472	180144639	.	-	0	gene_id "ENSSSCG00000034516"; gene_version "3"; transcript_id "ENSSSCT00000075014"; transcript_version "2"; exon_number "2"; gene_name "CDKL1"; gene_source "ensembl"; gene_biotype "protein_coding"; transcript_name "CDKL1-202"; transcript_source "ensembl"; transcript_biotype "protein_coding"; protein_id "ENSSSCP00000071907"; protein_version "2";
1	StringTie	transcript	180147405	180162756	.	+	.	transcript_id "MSTRG.2633.2"; gene_id "MSTRG.2633"; xloc "XLOC_001183"; class_code "u"; tss_id "TSS2032";	1	ensembl	start_codon	180144637	180144639	.	-	0	gene_id "ENSSSCG00000034516"; gene_version "3"; transcript_id "ENSSSCT00000075014"; transcript_version "2"; exon_number "2"; gene_name "CDKL1"; gene_source "ensembl"; gene_biotype "protein_coding"; transcript_name "CDKL1-202"; transcript_source "ensembl"; transcript_biotype "protein_coding";
1	StringTie	transcript	180147405	180162756	.	+	.	transcript_id "MSTRG.2633.2"; gene_id "MSTRG.2633"; xloc "XLOC_001183"; class_code "u"; tss_id "TSS2032";	1	ensembl	five_prime_utr	180144993	180145054	.	-	.	gene_id "ENSSSCG00000034516"; gene_version "3"; transcript_id "ENSSSCT00000075014"; transcript_version "2"; gene_name "CDKL1"; gene_source "ensembl"; gene_biotype "protein_coding"; transcript_name "CDKL1-202"; transcript_source "ensembl"; transcript_biotype "protein_coding";
1	StringTie	transcript	180147405	180162756	.	+	.	transcript_id "MSTRG.2633.2"; gene_id "MSTRG.2633"; xloc "XLOC_001183"; class_code "u"; tss_id "TSS2032";	1	ensembl	five_prime_utr	180144640	180144757	.	-	.	gene_id "ENSSSCG00000034516"; gene_version "3"; transcript_id "ENSSSCT00000075014"; transcript_version "2"; gene_name "CDKL1"; gene_source "ensembl"; gene_biotype "protein_coding"; transcript_name "CDKL1-202"; transcript_source "ensembl"; transcript_biotype "protein_coding";
1	StringTie	transcript	180147405	180162756	.	+	.	transcript_id "MSTRG.2633.2"; gene_id "MSTRG.2633"; xloc "XLOC_001183"; class_code "u"; tss_id "TSS2032";	1	ensembl	exon	180144993	180145032	.	-	.	gene_id "ENSSSCG00000034516"; gene_version "3"; transcript_id "ENSSSCT00000061065"; transcript_version "2"; exon_number "1"; gene_name "CDKL1"; gene_source "ensembl"; gene_biotype "protein_coding"; transcript_name "CDKL1-203"; transcript_source "ensembl"; transcript_biotype "protein_coding"; exon_id "ENSSSCE00000433102"; exon_version "1";
1	StringTie	transcript	180147405	180162756	.	+	.	transcript_id "MSTRG.2633.2"; gene_id "MSTRG.2633"; xloc "XLOC_001183"; class_code "u"; tss_id "TSS2032";	1	ensembl	exon	180144472	180144757	.	-	.	gene_id "ENSSSCG00000034516"; gene_version "3"; transcript_id "ENSSSCT00000061065"; transcript_version "2"; exon_number "2"; gene_name "CDKL1"; gene_source "ensembl"; gene_biotype "protein_coding"; transcript_name "CDKL1-203"; transcript_source "ensembl"; transcript_biotype "protein_coding"; exon_id "ENSSSCE00000308455"; exon_version "1";
1	StringTie	transcript	180147405	180162756	.	+	.	transcript_id "MSTRG.2633.2"; gene_id "MSTRG.2633"; xloc "XLOC_001183"; class_code "u"; tss_id "TSS2032";	1	ensembl	CDS	180144472	180144639	.	-	0	gene_id "ENSSSCG00000034516"; gene_version "3"; transcript_id "ENSSSCT00000061065"; transcript_version "2"; exon_number "2"; gene_name "CDKL1"; gene_source "ensembl"; gene_biotype "protein_coding"; transcript_name "CDKL1-203"; transcript_source "ensembl"; transcript_biotype "protein_coding"; protein_id "ENSSSCP00000036467"; protein_version "1";
1	StringTie	transcript	180147405	180162756	.	+	.	transcript_id "MSTRG.2633.2"; gene_id "MSTRG.2633"; xloc "XLOC_001183"; class_code "u"; tss_id "TSS2032";	1	ensembl	start_codon	180144637	180144639	.	-	0	gene_id "ENSSSCG00000034516"; gene_version "3"; transcript_id "ENSSSCT00000061065"; transcript_version "2"; exon_number "2"; gene_name "CDKL1"; gene_source "ensembl"; gene_biotype "protein_coding"; transcript_name "CDKL1-203"; transcript_source "ensembl"; transcript_biotype "protein_coding";
1	StringTie	transcript	180147405	180162756	.	+	.	transcript_id "MSTRG.2633.2"; gene_id "MSTRG.2633"; xloc "XLOC_001183"; class_code "u"; tss_id "TSS2032";	1	ensembl	five_prime_utr	180144993	180145032	.	-	.	gene_id "ENSSSCG00000034516"; gene_version "3"; transcript_id "ENSSSCT00000061065"; transcript_version "2"; gene_name "CDKL1"; gene_source "ensembl"; gene_biotype "protein_coding"; transcript_name "CDKL1-203"; transcript_source "ensembl"; transcript_biotype "protein_coding";
1	StringTie	transcript	180147405	180162756	.	+	.	transcript_id "MSTRG.2633.2"; gene_id "MSTRG.2633"; xloc "XLOC_001183"; class_code "u"; tss_id "TSS2032";	1	ensembl	five_prime_utr	180144640	180144757	.	-	.	gene_id "ENSSSCG00000034516"; gene_version "3"; transcript_id "ENSSSCT00000061065"; transcript_version "2"; gene_name "CDKL1"; gene_source "ensembl"; gene_biotype "protein_coding"; transcript_name "CDKL1-203"; transcript_source "ensembl"; transcript_biotype "protein_coding";
1	StringTie	transcript	180147405	180162756	.	+	.	transcript_id "MSTRG.2633.2"; gene_id "MSTRG.2633"; xloc "XLOC_001183"; class_code "u"; tss_id "TSS2032";	1	ensembl	exon	180173520	180173612	.	-	.	gene_id "ENSSSCG00000036634"; gene_version "3"; transcript_id "ENSSSCT00000087108"; transcript_version "2"; exon_number "30"; gene_name "MAP4K5"; gene_source "ensembl"; gene_biotype "protein_coding"; transcript_name "MAP4K5-201"; transcript_source "ensembl"; transcript_biotype "protein_coding"; exon_id "ENSSSCE00000367886"; exon_version "1";
1	StringTie	transcript	180147405	180162756	.	+	.	transcript_id "MSTRG.2633.2"; gene_id "MSTRG.2633"; xloc "XLOC_001183"; class_code "u"; tss_id "TSS2032";	1	ensembl	CDS	180173520	180173612	.	-	2	gene_id "ENSSSCG00000036634"; gene_version "3"; transcript_id "ENSSSCT00000087108"; transcript_version "2"; exon_number "30"; gene_name "MAP4K5"; gene_source "ensembl"; gene_biotype "protein_coding"; transcript_name "MAP4K5-201"; transcript_source "ensembl"; transcript_biotype "protein_coding"; protein_id "ENSSSCP00000060345"; protein_version "2";
1	StringTie	transcript	180147405	180162756	.	+	.	transcript_id "MSTRG.2633.2"; gene_id "MSTRG.2633"; xloc "XLOC_001183"; class_code "u"; tss_id "TSS2032";	1	ensembl	exon	180170189	180170259	.	-	.	gene_id "ENSSSCG00000036634"; gene_version "3"; transcript_id "ENSSSCT00000087108"; transcript_version "2"; exon_number "31"; gene_name "MAP4K5"; gene_source "ensembl"; gene_biotype "protein_coding"; transcript_name "MAP4K5-201"; transcript_source "ensembl"; transcript_biotype "protein_coding"; exon_id "ENSSSCE00000208369"; exon_version "2";
1	StringTie	transcript	180147405	180162756	.	+	.	transcript_id "MSTRG.2633.2"; gene_id "MSTRG.2633"; xloc "XLOC_001183"; class_code "u"; tss_id "TSS2032";	1	ensembl	CDS	180170189	180170259	.	-	2	gene_id "ENSSSCG00000036634"; gene_version "3"; transcript_id "ENSSSCT00000087108"; transcript_version "2"; exon_number "31"; gene_name "MAP4K5"; gene_source "ensembl"; gene_biotype "protein_coding"; transcript_name "MAP4K5-201"; transcript_source "ensembl"; transcript_biotype "protein_coding"; protein_id "ENSSSCP00000060345"; protein_version "2";
1	StringTie	transcript	180147405	180162756	.	+	.	transcript_id "MSTRG.2633.2"; gene_id "MSTRG.2633"; xloc "XLOC_001183"; class_code "u"; tss_id "TSS2032";	1	ensembl	exon	180167691	180167746	.	-	.	gene_id "ENSSSCG00000036634"; gene_version "3"; transcript_id "ENSSSCT00000087108"; transcript_version "2"; exon_number "32"; gene_name "MAP4K5"; gene_source "ensembl"; gene_biotype "protein_coding"; transcript_name "MAP4K5-201"; transcript_source "ensembl"; transcript_biotype "protein_coding"; exon_id "ENSSSCE00000334155"; exon_version "1";
1	StringTie	transcript	180147405	180162756	.	+	.	transcript_id "MSTRG.2633.2"; gene_id "MSTRG.2633"; xloc "XLOC_001183"; class_code "u"; tss_id "TSS2032";	1	ensembl	CDS	180167691	180167746	.	-	0	gene_id "ENSSSCG00000036634"; gene_version "3"; transcript_id "ENSSSCT00000087108"; transcript_version "2"; exon_number "32"; gene_name "MAP4K5"; gene_source "ensembl"; gene_biotype "protein_coding"; transcript_name "MAP4K5-201"; transcript_source "ensembl"; transcript_biotype "protein_coding"; protein_id "ENSSSCP00000060345"; protein_version "2";
1	StringTie	transcript	180147405	180162756	.	+	.	transcript_id "MSTRG.2633.2"; gene_id "MSTRG.2633"; xloc "XLOC_001183"; class_code "u"; tss_id "TSS2032";	1	ensembl	exon	180164458	180166059	.	-	.	gene_id "ENSSSCG00000036634"; gene_version "3"; transcript_id "ENSSSCT00000087108"; transcript_version "2"; exon_number "33"; gene_name "MAP4K5"; gene_source "ensembl"; gene_biotype "protein_coding"; transcript_name "MAP4K5-201"; transcript_source "ensembl"; transcript_biotype "protein_coding"; exon_id "ENSSSCE00000301069"; exon_version "2";
1	StringTie	transcript	180147405	180162756	.	+	.	transcript_id "MSTRG.2633.2"; gene_id "MSTRG.2633"; xloc "XLOC_001183"; class_code "u"; tss_id "TSS2032";	1	ensembl	CDS	180165975	180166059	.	-	1	gene_id "ENSSSCG00000036634"; gene_version "3"; transcript_id "ENSSSCT00000087108"; transcript_version "2"; exon_number "33"; gene_name "MAP4K5"; gene_source "ensembl"; gene_biotype "protein_coding"; transcript_name "MAP4K5-201"; transcript_source "ensembl"; transcript_biotype "protein_coding"; protein_id "ENSSSCP00000060345"; protein_version "2";
1	StringTie	transcript	180147405	180162756	.	+	.	transcript_id "MSTRG.2633.2"; gene_id "MSTRG.2633"; xloc "XLOC_001183"; class_code "u"; tss_id "TSS2032";	1	ensembl	stop_codon	180165972	180165974	.	-	0	gene_id "ENSSSCG00000036634"; gene_version "3"; transcript_id "ENSSSCT00000087108"; transcript_version "2"; exon_number "33"; gene_name "MAP4K5"; gene_source "ensembl"; gene_biotype "protein_coding"; transcript_name "MAP4K5-201"; transcript_source "ensembl"; transcript_biotype "protein_coding";
1	StringTie	transcript	180147405	180162756	.	+	.	transcript_id "MSTRG.2633.2"; gene_id "MSTRG.2633"; xloc "XLOC_001183"; class_code "u"; tss_id "TSS2032";	1	ensembl	three_prime_utr	180164458	180165971	.	-	.	gene_id "ENSSSCG00000036634"; gene_version "3"; transcript_id "ENSSSCT00000087108"; transcript_version "2"; gene_name "MAP4K5"; gene_source "ensembl"; gene_biotype "protein_coding"; transcript_name "MAP4K5-201"; transcript_source "ensembl"; transcript_biotype "protein_coding";
1	StringTie	transcript	180147405	180162756	.	+	.	transcript_id "MSTRG.2633.2"; gene_id "MSTRG.2633"; xloc "XLOC_001183"; class_code "u"; tss_id "TSS2032";	1	ensembl	exon	180173520	180173612	.	-	.	gene_id "ENSSSCG00000036634"; gene_version "3"; transcript_id "ENSSSCT00000053912"; transcript_version "3"; exon_number "29"; gene_name "MAP4K5"; gene_source "ensembl"; gene_biotype "protein_coding"; transcript_name "MAP4K5-202"; transcript_source "ensembl"; transcript_biotype "protein_coding"; exon_id "ENSSSCE00000367886"; exon_version "1";
1	StringTie	transcript	180147405	180162756	.	+	.	transcript_id "MSTRG.2633.2"; gene_id "MSTRG.2633"; xloc "XLOC_001183"; class_code "u"; tss_id "TSS2032";	1	ensembl	CDS	180173520	180173612	.	-	2	gene_id "ENSSSCG00000036634"; gene_version "3"; transcript_id "ENSSSCT00000053912"; transcript_version "3"; exon_number "29"; gene_name "MAP4K5"; gene_source "ensembl"; gene_biotype "protein_coding"; transcript_name "MAP4K5-202"; transcript_source "ensembl"; transcript_biotype "protein_coding"; protein_id "ENSSSCP00000057390"; protein_version "3";
1	StringTie	transcript	180147405	180162756	.	+	.	transcript_id "MSTRG.2633.2"; gene_id "MSTRG.2633"; xloc "XLOC_001183"; class_code "u"; tss_id "TSS2032";	1	ensembl	exon	180170189	180170259	.	-	.	gene_id "ENSSSCG00000036634"; gene_version "3"; transcript_id "ENSSSCT00000053912"; transcript_version "3"; exon_number "30"; gene_name "MAP4K5"; gene_source "ensembl"; gene_biotype "protein_coding"; transcript_name "MAP4K5-202"; transcript_source "ensembl"; transcript_biotype "protein_coding"; exon_id "ENSSSCE00000208369"; exon_version "2";
1	StringTie	transcript	180147405	180162756	.	+	.	transcript_id "MSTRG.2633.2"; gene_id "MSTRG.2633"; xloc "XLOC_001183"; class_code "u"; tss_id "TSS2032";	1	ensembl	CDS	180170189	180170259	.	-	2	gene_id "ENSSSCG00000036634"; gene_version "3"; transcript_id "ENSSSCT00000053912"; transcript_version "3"; exon_number "30"; gene_name "MAP4K5"; gene_source "ensembl"; gene_biotype "protein_coding"; transcript_name "MAP4K5-202"; transcript_source "ensembl"; transcript_biotype "protein_coding"; protein_id "ENSSSCP00000057390"; protein_version "3";
1	StringTie	transcript	180147405	180162756	.	+	.	transcript_id "MSTRG.2633.2"; gene_id "MSTRG.2633"; xloc "XLOC_001183"; class_code "u"; tss_id "TSS2032";	1	ensembl	exon	180167691	180167746	.	-	.	gene_id "ENSSSCG00000036634"; gene_version "3"; transcript_id "ENSSSCT00000053912"; transcript_version "3"; exon_number "31"; gene_name "MAP4K5"; gene_source "ensembl"; gene_biotype "protein_coding"; transcript_name "MAP4K5-202"; transcript_source "ensembl"; transcript_biotype "protein_coding"; exon_id "ENSSSCE00000334155"; exon_version "1";
1	StringTie	transcript	180147405	180162756	.	+	.	transcript_id "MSTRG.2633.2"; gene_id "MSTRG.2633"; xloc "XLOC_001183"; class_code "u"; tss_id "TSS2032";	1	ensembl	CDS	180167691	180167746	.	-	0	gene_id "ENSSSCG00000036634"; gene_version "3"; transcript_id "ENSSSCT00000053912"; transcript_version "3"; exon_number "31"; gene_name "MAP4K5"; gene_source "ensembl"; gene_biotype "protein_coding"; transcript_name "MAP4K5-202"; transcript_source "ensembl"; transcript_biotype "protein_coding"; protein_id "ENSSSCP00000057390"; protein_version "3";
1	StringTie	transcript	180147405	180162756	.	+	.	transcript_id "MSTRG.2633.2"; gene_id "MSTRG.2633"; xloc "XLOC_001183"; class_code "u"; tss_id "TSS2032";	1	ensembl	exon	180164458	180166059	.	-	.	gene_id "ENSSSCG00000036634"; gene_version "3"; transcript_id "ENSSSCT00000053912"; transcript_version "3"; exon_number "32"; gene_name "MAP4K5"; gene_source "ensembl"; gene_biotype "protein_coding"; transcript_name "MAP4K5-202"; transcript_source "ensembl"; transcript_biotype "protein_coding"; exon_id "ENSSSCE00000301069"; exon_version "2";
1	StringTie	transcript	180147405	180162756	.	+	.	transcript_id "MSTRG.2633.2"; gene_id "MSTRG.2633"; xloc "XLOC_001183"; class_code "u"; tss_id "TSS2032";	1	ensembl	CDS	180165975	180166059	.	-	1	gene_id "ENSSSCG00000036634"; gene_version "3"; transcript_id "ENSSSCT00000053912"; transcript_version "3"; exon_number "32"; gene_name "MAP4K5"; gene_source "ensembl"; gene_biotype "protein_coding"; transcript_name "MAP4K5-202"; transcript_source "ensembl"; transcript_biotype "protein_coding"; protein_id "ENSSSCP00000057390"; protein_version "3";
1	StringTie	transcript	180147405	180162756	.	+	.	transcript_id "MSTRG.2633.2"; gene_id "MSTRG.2633"; xloc "XLOC_001183"; class_code "u"; tss_id "TSS2032";	1	ensembl	stop_codon	180165972	180165974	.	-	0	gene_id "ENSSSCG00000036634"; gene_version "3"; transcript_id "ENSSSCT00000053912"; transcript_version "3"; exon_number "32"; gene_name "MAP4K5"; gene_source "ensembl"; gene_biotype "protein_coding"; transcript_name "MAP4K5-202"; transcript_source "ensembl"; transcript_biotype "protein_coding";
1	StringTie	transcript	180147405	180162756	.	+	.	transcript_id "MSTRG.2633.2"; gene_id "MSTRG.2633"; xloc "XLOC_001183"; class_code "u"; tss_id "TSS2032";	1	ensembl	three_prime_utr	180164458	180165971	.	-	.	gene_id "ENSSSCG00000036634"; gene_version "3"; transcript_id "ENSSSCT00000053912"; transcript_version "3"; gene_name "MAP4K5"; gene_source "ensembl"; gene_biotype "protein_coding"; transcript_name "MAP4K5-202"; transcript_source "ensembl"; transcript_biotype "protein_coding";
1	StringTie	transcript	180147405	180162756	.	+	.	transcript_id "MSTRG.2633.2"; gene_id "MSTRG.2633"; xloc "XLOC_001183"; class_code "u"; tss_id "TSS2032";	1	ensembl	exon	180187953	180187955	.	-	.	gene_id "ENSSSCG00000036634"; gene_version "3"; transcript_id "ENSSSCT00000087108"; transcript_version "2"; exon_number "24"; gene_name "MAP4K5"; gene_source "ensembl"; gene_biotype "protein_coding"; transcript_name "MAP4K5-201"; transcript_source "ensembl"; transcript_biotype "protein_coding"; exon_id "ENSSSCE00000517557"; exon_version "1";
1	StringTie	transcript	180147405	180162756	.	+	.	transcript_id "MSTRG.2633.2"; gene_id "MSTRG.2633"; xloc "XLOC_001183"; class_code "u"; tss_id "TSS2032";	1	ensembl	CDS	180187953	180187955	.	-	2	gene_id "ENSSSCG00000036634"; gene_version "3"; transcript_id "ENSSSCT00000087108"; transcript_version "2"; exon_number "24"; gene_name "MAP4K5"; gene_source "ensembl"; gene_biotype "protein_coding"; transcript_name "MAP4K5-201"; transcript_source "ensembl"; transcript_biotype "protein_coding"; protein_id "ENSSSCP00000060345"; protein_version "2";
1	StringTie	transcript	180147405	180162756	.	+	.	transcript_id "MSTRG.2633.2"; gene_id "MSTRG.2633"; xloc "XLOC_001183"; class_code "u"; tss_id "TSS2032";	1	ensembl	exon	180187757	180187871	.	-	.	gene_id "ENSSSCG00000036634"; gene_version "3"; transcript_id "ENSSSCT00000087108"; transcript_version "2"; exon_number "25"; gene_name "MAP4K5"; gene_source "ensembl"; gene_biotype "protein_coding"; transcript_name "MAP4K5-201"; transcript_source "ensembl"; transcript_biotype "protein_coding"; exon_id "ENSSSCE00000288414"; exon_version "2";
1	StringTie	transcript	180147405	180162756	.	+	.	transcript_id "MSTRG.2633.2"; gene_id "MSTRG.2633"; xloc "XLOC_001183"; class_code "u"; tss_id "TSS2032";	1	ensembl	CDS	180187757	180187871	.	-	2	gene_id "ENSSSCG00000036634"; gene_version "3"; transcript_id "ENSSSCT00000087108"; transcript_version "2"; exon_number "25"; gene_name "MAP4K5"; gene_source "ensembl"; gene_biotype "protein_coding"; transcript_name "MAP4K5-201"; transcript_source "ensembl"; transcript_biotype "protein_coding"; protein_id "ENSSSCP00000060345"; protein_version "2";
1	StringTie	transcript	180147405	180162756	.	+	.	transcript_id "MSTRG.2633.2"; gene_id "MSTRG.2633"; xloc "XLOC_001183"; class_code "u"; tss_id "TSS2032";	1	ensembl	exon	180187074	180187132	.	-	.	gene_id "ENSSSCG00000036634"; gene_version "3"; transcript_id "ENSSSCT00000087108"; transcript_version "2"; exon_number "26"; gene_name "MAP4K5"; gene_source "ensembl"; gene_biotype "protein_coding"; transcript_name "MAP4K5-201"; transcript_source "ensembl"; transcript_biotype "protein_coding"; exon_id "ENSSSCE00000305656"; exon_version "1";
1	StringTie	transcript	180147405	180162756	.	+	.	transcript_id "MSTRG.2633.2"; gene_id "MSTRG.2633"; xloc "XLOC_001183"; class_code "u"; tss_id "TSS2032";	1	ensembl	CDS	180187074	180187132	.	-	1	gene_id "ENSSSCG00000036634"; gene_version "3"; transcript_id "ENSSSCT00000087108"; transcript_version "2"; exon_number "26"; gene_name "MAP4K5"; gene_source "ensembl"; gene_biotype "protein_coding"; transcript_name "MAP4K5-201"; transcript_source "ensembl"; transcript_biotype "protein_coding"; protein_id "ENSSSCP00000060345"; protein_version "2";
1	StringTie	transcript	180147405	180162756	.	+	.	transcript_id "MSTRG.2633.2"; gene_id "MSTRG.2633"; xloc "XLOC_001183"; class_code "u"; tss_id "TSS2032";	1	ensembl	exon	180182967	180183070	.	-	.	gene_id "ENSSSCG00000036634"; gene_version "3"; transcript_id "ENSSSCT00000087108"; transcript_version "2"; exon_number "27"; gene_name "MAP4K5"; gene_source "ensembl"; gene_biotype "protein_coding"; transcript_name "MAP4K5-201"; transcript_source "ensembl"; transcript_biotype "protein_coding"; exon_id "ENSSSCE00000208153"; exon_version "2";
1	StringTie	transcript	180147405	180162756	.	+	.	transcript_id "MSTRG.2633.2"; gene_id "MSTRG.2633"; xloc "XLOC_001183"; class_code "u"; tss_id "TSS2032";	1	ensembl	CDS	180182967	180183070	.	-	2	gene_id "ENSSSCG00000036634"; gene_version "3"; transcript_id "ENSSSCT00000087108"; transcript_version "2"; exon_number "27"; gene_name "MAP4K5"; gene_source "ensembl"; gene_biotype "protein_coding"; transcript_name "MAP4K5-201"; transcript_source "ensembl"; transcript_biotype "protein_coding"; protein_id "ENSSSCP00000060345"; protein_version "2";
1	StringTie	transcript	180147405	180162756	.	+	.	transcript_id "MSTRG.2633.2"; gene_id "MSTRG.2633"; xloc "XLOC_001183"; class_code "u"; tss_id "TSS2032";	1	ensembl	exon	180180010	180180187	.	-	.	gene_id "ENSSSCG00000036634"; gene_version "3"; transcript_id "ENSSSCT00000087108"; transcript_version "2"; exon_number "28"; gene_name "MAP4K5"; gene_source "ensembl"; gene_biotype "protein_coding"; transcript_name "MAP4K5-201"; transcript_source "ensembl"; transcript_biotype "protein_coding"; exon_id "ENSSSCE00000366227"; exon_version "1";
1	StringTie	transcript	180147405	180162756	.	+	.	transcript_id "MSTRG.2633.2"; gene_id "MSTRG.2633"; xloc "XLOC_001183"; class_code "u"; tss_id "TSS2032";	1	ensembl	CDS	180180010	180180187	.	-	0	gene_id "ENSSSCG00000036634"; gene_version "3"; transcript_id "ENSSSCT00000087108"; transcript_version "2"; exon_number "28"; gene_name "MAP4K5"; gene_source "ensembl"; gene_biotype "protein_coding"; transcript_name "MAP4K5-201"; transcript_source "ensembl"; transcript_biotype "protein_coding"; protein_id "ENSSSCP00000060345"; protein_version "2";
1	StringTie	transcript	180147405	180162756	.	+	.	transcript_id "MSTRG.2633.2"; gene_id "MSTRG.2633"; xloc "XLOC_001183"; class_code "u"; tss_id "TSS2032";	1	ensembl	exon	180177094	180177162	.	-	.	gene_id "ENSSSCG00000036634"; gene_version "3"; transcript_id "ENSSSCT00000087108"; transcript_version "2"; exon_number "29"; gene_name "MAP4K5"; gene_source "ensembl"; gene_biotype "protein_coding"; transcript_name "MAP4K5-201"; transcript_source "ensembl"; transcript_biotype "protein_coding"; exon_id "ENSSSCE00000319741"; exon_version "1";
1	StringTie	transcript	180147405	180162756	.	+	.	transcript_id "MSTRG.2633.2"; gene_id "MSTRG.2633"; xloc "XLOC_001183"; class_code "u"; tss_id "TSS2032";	1	ensembl	CDS	180177094	180177162	.	-	2	gene_id "ENSSSCG00000036634"; gene_version "3"; transcript_id "ENSSSCT00000087108"; transcript_version "2"; exon_number "29"; gene_name "MAP4K5"; gene_source "ensembl"; gene_biotype "protein_coding"; transcript_name "MAP4K5-201"; transcript_source "ensembl"; transcript_biotype "protein_coding"; protein_id "ENSSSCP00000060345"; protein_version "2";
1	StringTie	transcript	180147405	180162756	.	+	.	transcript_id "MSTRG.2633.2"; gene_id "MSTRG.2633"; xloc "XLOC_001183"; class_code "u"; tss_id "TSS2032";	1	ensembl	exon	180187757	180187871	.	-	.	gene_id "ENSSSCG00000036634"; gene_version "3"; transcript_id "ENSSSCT00000053912"; transcript_version "3"; exon_number "24"; gene_name "MAP4K5"; gene_source "ensembl"; gene_biotype "protein_coding"; transcript_name "MAP4K5-202"; transcript_source "ensembl"; transcript_biotype "protein_coding"; exon_id "ENSSSCE00000288414"; exon_version "2";
1	StringTie	transcript	180147405	180162756	.	+	.	transcript_id "MSTRG.2633.2"; gene_id "MSTRG.2633"; xloc "XLOC_001183"; class_code "u"; tss_id "TSS2032";	1	ensembl	CDS	180187757	180187871	.	-	2	gene_id "ENSSSCG00000036634"; gene_version "3"; transcript_id "ENSSSCT00000053912"; transcript_version "3"; exon_number "24"; gene_name "MAP4K5"; gene_source "ensembl"; gene_biotype "protein_coding"; transcript_name "MAP4K5-202"; transcript_source "ensembl"; transcript_biotype "protein_coding"; protein_id "ENSSSCP00000057390"; protein_version "3";
1	StringTie	transcript	180147405	180162756	.	+	.	transcript_id "MSTRG.2633.2"; gene_id "MSTRG.2633"; xloc "XLOC_001183"; class_code "u"; tss_id "TSS2032";	1	ensembl	exon	180187074	180187132	.	-	.	gene_id "ENSSSCG00000036634"; gene_version "3"; transcript_id "ENSSSCT00000053912"; transcript_version "3"; exon_number "25"; gene_name "MAP4K5"; gene_source "ensembl"; gene_biotype "protein_coding"; transcript_name "MAP4K5-202"; transcript_source "ensembl"; transcript_biotype "protein_coding"; exon_id "ENSSSCE00000305656"; exon_version "1";
1	StringTie	transcript	180147405	180162756	.	+	.	transcript_id "MSTRG.2633.2"; gene_id "MSTRG.2633"; xloc "XLOC_001183"; class_code "u"; tss_id "TSS2032";	1	ensembl	CDS	180187074	180187132	.	-	1	gene_id "ENSSSCG00000036634"; gene_version "3"; transcript_id "ENSSSCT00000053912"; transcript_version "3"; exon_number "25"; gene_name "MAP4K5"; gene_source "ensembl"; gene_biotype "protein_coding"; transcript_name "MAP4K5-202"; transcript_source "ensembl"; transcript_biotype "protein_coding"; protein_id "ENSSSCP00000057390"; protein_version "3";
1	StringTie	transcript	180147405	180162756	.	+	.	transcript_id "MSTRG.2633.2"; gene_id "MSTRG.2633"; xloc "XLOC_001183"; class_code "u"; tss_id "TSS2032";	1	ensembl	exon	180182967	180183070	.	-	.	gene_id "ENSSSCG00000036634"; gene_version "3"; transcript_id "ENSSSCT00000053912"; transcript_version "3"; exon_number "26"; gene_name "MAP4K5"; gene_source "ensembl"; gene_biotype "protein_coding"; transcript_name "MAP4K5-202"; transcript_source "ensembl"; transcript_biotype "protein_coding"; exon_id "ENSSSCE00000208153"; exon_version "2";
1	StringTie	transcript	180147405	180162756	.	+	.	transcript_id "MSTRG.2633.2"; gene_id "MSTRG.2633"; xloc "XLOC_001183"; class_code "u"; tss_id "TSS2032";	1	ensembl	CDS	180182967	180183070	.	-	2	gene_id "ENSSSCG00000036634"; gene_version "3"; transcript_id "ENSSSCT00000053912"; transcript_version "3"; exon_number "26"; gene_name "MAP4K5"; gene_source "ensembl"; gene_biotype "protein_coding"; transcript_name "MAP4K5-202"; transcript_source "ensembl"; transcript_biotype "protein_coding"; protein_id "ENSSSCP00000057390"; protein_version "3";
1	StringTie	transcript	180147405	180162756	.	+	.	transcript_id "MSTRG.2633.2"; gene_id "MSTRG.2633"; xloc "XLOC_001183"; class_code "u"; tss_id "TSS2032";	1	ensembl	exon	180180010	180180187	.	-	.	gene_id "ENSSSCG00000036634"; gene_version "3"; transcript_id "ENSSSCT00000053912"; transcript_version "3"; exon_number "27"; gene_name "MAP4K5"; gene_source "ensembl"; gene_biotype "protein_coding"; transcript_name "MAP4K5-202"; transcript_source "ensembl"; transcript_biotype "protein_coding"; exon_id "ENSSSCE00000366227"; exon_version "1";
1	StringTie	transcript	180147405	180162756	.	+	.	transcript_id "MSTRG.2633.2"; gene_id "MSTRG.2633"; xloc "XLOC_001183"; class_code "u"; tss_id "TSS2032";	1	ensembl	CDS	180180010	180180187	.	-	0	gene_id "ENSSSCG00000036634"; gene_version "3"; transcript_id "ENSSSCT00000053912"; transcript_version "3"; exon_number "27"; gene_name "MAP4K5"; gene_source "ensembl"; gene_biotype "protein_coding"; transcript_name "MAP4K5-202"; transcript_source "ensembl"; transcript_biotype "protein_coding"; protein_id "ENSSSCP00000057390"; protein_version "3";
1	StringTie	transcript	180147405	180162756	.	+	.	transcript_id "MSTRG.2633.2"; gene_id "MSTRG.2633"; xloc "XLOC_001183"; class_code "u"; tss_id "TSS2032";	1	ensembl	exon	180177094	180177162	.	-	.	gene_id "ENSSSCG00000036634"; gene_version "3"; transcript_id "ENSSSCT00000053912"; transcript_version "3"; exon_number "28"; gene_name "MAP4K5"; gene_source "ensembl"; gene_biotype "protein_coding"; transcript_name "MAP4K5-202"; transcript_source "ensembl"; transcript_biotype "protein_coding"; exon_id "ENSSSCE00000319741"; exon_version "1";
1	StringTie	transcript	180147405	180162756	.	+	.	transcript_id "MSTRG.2633.2"; gene_id "MSTRG.2633"; xloc "XLOC_001183"; class_code "u"; tss_id "TSS2032";	1	ensembl	CDS	180177094	180177162	.	-	2	gene_id "ENSSSCG00000036634"; gene_version "3"; transcript_id "ENSSSCT00000053912"; transcript_version "3"; exon_number "28"; gene_name "MAP4K5"; gene_source "ensembl"; gene_biotype "protein_coding"; transcript_name "MAP4K5-202"; transcript_source "ensembl"; transcript_biotype "protein_coding"; protein_id "ENSSSCP00000057390"; protein_version "3";
1	StringTie	transcript	180147405	180162756	.	+	.	transcript_id "MSTRG.2633.2"; gene_id "MSTRG.2633"; xloc "XLOC_001183"; class_code "u"; tss_id "TSS2032";	1	ensembl	exon	180201578	180201636	.	-	.	gene_id "ENSSSCG00000036634"; gene_version "3"; transcript_id "ENSSSCT00000087108"; transcript_version "2"; exon_number "15"; gene_name "MAP4K5"; gene_source "ensembl"; gene_biotype "protein_coding"; transcript_name "MAP4K5-201"; transcript_source "ensembl"; transcript_biotype "protein_coding"; exon_id "ENSSSCE00000330908"; exon_version "1";
1	StringTie	transcript	180147405	180162756	.	+	.	transcript_id "MSTRG.2633.2"; gene_id "MSTRG.2633"; xloc "XLOC_001183"; class_code "u"; tss_id "TSS2032";	1	ensembl	CDS	180201578	180201636	.	-	2	gene_id "ENSSSCG00000036634"; gene_version "3"; transcript_id "ENSSSCT00000087108"; transcript_version "2"; exon_number "15"; gene_name "MAP4K5"; gene_source "ensembl"; gene_biotype "protein_coding"; transcript_name "MAP4K5-201"; transcript_source "ensembl"; transcript_biotype "protein_coding"; protein_id "ENSSSCP00000060345"; protein_version "2";
1	StringTie	transcript	180147405	180162756	.	+	.	transcript_id "MSTRG.2633.2"; gene_id "MSTRG.2633"; xloc "XLOC_001183"; class_code "u"; tss_id "TSS2032";	1	ensembl	exon	180200260	180200327	.	-	.	gene_id "ENSSSCG00000036634"; gene_version "3"; transcript_id "ENSSSCT00000087108"; transcript_version "2"; exon_number "16"; gene_name "MAP4K5"; gene_source "ensembl"; gene_biotype "protein_coding"; transcript_name "MAP4K5-201"; transcript_source "ensembl"; transcript_biotype "protein_coding"; exon_id "ENSSSCE00000327220"; exon_version "1";
1	StringTie	transcript	180147405	180162756	.	+	.	transcript_id "MSTRG.2633.2"; gene_id "MSTRG.2633"; xloc "XLOC_001183"; class_code "u"; tss_id "TSS2032";	1	ensembl	CDS	180200260	180200327	.	-	0	gene_id "ENSSSCG00000036634"; gene_version "3"; transcript_id "ENSSSCT00000087108"; transcript_version "2"; exon_number "16"; gene_name "MAP4K5"; gene_source "ensembl"; gene_biotype "protein_coding"; transcript_name "MAP4K5-201"; transcript_source "ensembl"; transcript_biotype "protein_coding"; protein_id "ENSSSCP00000060345"; protein_version "2";
1	StringTie	transcript	180147405	180162756	.	+	.	transcript_id "MSTRG.2633.2"; gene_id "MSTRG.2633"; xloc "XLOC_001183"; class_code "u"; tss_id "TSS2032";	1	ensembl	exon	180198281	180198323	.	-	.	gene_id "ENSSSCG00000036634"; gene_version "3"; transcript_id "ENSSSCT00000087108"; transcript_version "2"; exon_number "17"; gene_name "MAP4K5"; gene_source "ensembl"; gene_biotype "protein_coding"; transcript_name "MAP4K5-201"; transcript_source "ensembl"; transcript_biotype "protein_coding"; exon_id "ENSSSCE00000307716"; exon_version "1";
1	StringTie	transcript	180147405	180162756	.	+	.	transcript_id "MSTRG.2633.2"; gene_id "MSTRG.2633"; xloc "XLOC_001183"; class_code "u"; tss_id "TSS2032";	1	ensembl	CDS	180198281	180198323	.	-	1	gene_id "ENSSSCG00000036634"; gene_version "3"; transcript_id "ENSSSCT00000087108"; transcript_version "2"; exon_number "17"; gene_name "MAP4K5"; gene_source "ensembl"; gene_biotype "protein_coding"; transcript_name "MAP4K5-201"; transcript_source "ensembl"; transcript_biotype "protein_coding"; protein_id "ENSSSCP00000060345"; protein_version "2";
1	StringTie	transcript	180147405	180162756	.	+	.	transcript_id "MSTRG.2633.2"; gene_id "MSTRG.2633"; xloc "XLOC_001183"; class_code "u"; tss_id "TSS2032";	1	ensembl	exon	180197053	180197206	.	-	.	gene_id "ENSSSCG00000036634"; gene_version "3"; transcript_id "ENSSSCT00000087108"; transcript_version "2"; exon_number "18"; gene_name "MAP4K5"; gene_source "ensembl"; gene_biotype "protein_coding"; transcript_name "MAP4K5-201"; transcript_source "ensembl"; transcript_biotype "protein_coding"; exon_id "ENSSSCE00000302264"; exon_version "1";
1	StringTie	transcript	180147405	180162756	.	+	.	transcript_id "MSTRG.2633.2"; gene_id "MSTRG.2633"; xloc "XLOC_001183"; class_code "u"; tss_id "TSS2032";	1	ensembl	CDS	180197053	180197206	.	-	0	gene_id "ENSSSCG00000036634"; gene_version "3"; transcript_id "ENSSSCT00000087108"; transcript_version "2"; exon_number "18"; gene_name "MAP4K5"; gene_source "ensembl"; gene_biotype "protein_coding"; transcript_name "MAP4K5-201"; transcript_source "ensembl"; transcript_biotype "protein_coding"; protein_id "ENSSSCP00000060345"; protein_version "2";
1	StringTie	transcript	180147405	180162756	.	+	.	transcript_id "MSTRG.2633.2"; gene_id "MSTRG.2633"; xloc "XLOC_001183"; class_code "u"; tss_id "TSS2032";	1	ensembl	exon	180195673	180195770	.	-	.	gene_id "ENSSSCG00000036634"; gene_version "3"; transcript_id "ENSSSCT00000087108"; transcript_version "2"; exon_number "19"; gene_name "MAP4K5"; gene_source "ensembl"; gene_biotype "protein_coding"; transcript_name "MAP4K5-201"; transcript_source "ensembl"; transcript_biotype "protein_coding"; exon_id "ENSSSCE00000304470"; exon_version "1";
1	StringTie	transcript	180147405	180162756	.	+	.	transcript_id "MSTRG.2633.2"; gene_id "MSTRG.2633"; xloc "XLOC_001183"; class_code "u"; tss_id "TSS2032";	1	ensembl	CDS	180195673	180195770	.	-	2	gene_id "ENSSSCG00000036634"; gene_version "3"; transcript_id "ENSSSCT00000087108"; transcript_version "2"; exon_number "19"; gene_name "MAP4K5"; gene_source "ensembl"; gene_biotype "protein_coding"; transcript_name "MAP4K5-201"; transcript_source "ensembl"; transcript_biotype "protein_coding"; protein_id "ENSSSCP00000060345"; protein_version "2";
1	StringTie	transcript	180147405	180162756	.	+	.	transcript_id "MSTRG.2633.2"; gene_id "MSTRG.2633"; xloc "XLOC_001183"; class_code "u"; tss_id "TSS2032";	1	ensembl	exon	180195461	180195502	.	-	.	gene_id "ENSSSCG00000036634"; gene_version "3"; transcript_id "ENSSSCT00000087108"; transcript_version "2"; exon_number "20"; gene_name "MAP4K5"; gene_source "ensembl"; gene_biotype "protein_coding"; transcript_name "MAP4K5-201"; transcript_source "ensembl"; transcript_biotype "protein_coding"; exon_id "ENSSSCE00000357137"; exon_version "1";
1	StringTie	transcript	180147405	180162756	.	+	.	transcript_id "MSTRG.2633.2"; gene_id "MSTRG.2633"; xloc "XLOC_001183"; class_code "u"; tss_id "TSS2032";	1	ensembl	CDS	180195461	180195502	.	-	0	gene_id "ENSSSCG00000036634"; gene_version "3"; transcript_id "ENSSSCT00000087108"; transcript_version "2"; exon_number "20"; gene_name "MAP4K5"; gene_source "ensembl"; gene_biotype "protein_coding"; transcript_name "MAP4K5-201"; transcript_source "ensembl"; transcript_biotype "protein_coding"; protein_id "ENSSSCP00000060345"; protein_version "2";
1	StringTie	transcript	180147405	180162756	.	+	.	transcript_id "MSTRG.2633.2"; gene_id "MSTRG.2633"; xloc "XLOC_001183"; class_code "u"; tss_id "TSS2032";	1	ensembl	exon	180194125	180194209	.	-	.	gene_id "ENSSSCG00000036634"; gene_version "3"; transcript_id "ENSSSCT00000087108"; transcript_version "2"; exon_number "21"; gene_name "MAP4K5"; gene_source "ensembl"; gene_biotype "protein_coding"; transcript_name "MAP4K5-201"; transcript_source "ensembl"; transcript_biotype "protein_coding"; exon_id "ENSSSCE00000297736"; exon_version "1";
1	StringTie	transcript	180147405	180162756	.	+	.	transcript_id "MSTRG.2633.2"; gene_id "MSTRG.2633"; xloc "XLOC_001183"; class_code "u"; tss_id "TSS2032";	1	ensembl	CDS	180194125	180194209	.	-	0	gene_id "ENSSSCG00000036634"; gene_version "3"; transcript_id "ENSSSCT00000087108"; transcript_version "2"; exon_number "21"; gene_name "MAP4K5"; gene_source "ensembl"; gene_biotype "protein_coding"; transcript_name "MAP4K5-201"; transcript_source "ensembl"; transcript_biotype "protein_coding"; protein_id "ENSSSCP00000060345"; protein_version "2";
1	StringTie	transcript	180147405	180162756	.	+	.	transcript_id "MSTRG.2633.2"; gene_id "MSTRG.2633"; xloc "XLOC_001183"; class_code "u"; tss_id "TSS2032";	1	ensembl	exon	180191671	180191750	.	-	.	gene_id "ENSSSCG00000036634"; gene_version "3"; transcript_id "ENSSSCT00000087108"; transcript_version "2"; exon_number "22"; gene_name "MAP4K5"; gene_source "ensembl"; gene_biotype "protein_coding"; transcript_name "MAP4K5-201"; transcript_source "ensembl"; transcript_biotype "protein_coding"; exon_id "ENSSSCE00000310709"; exon_version "1";
1	StringTie	transcript	180147405	180162756	.	+	.	transcript_id "MSTRG.2633.2"; gene_id "MSTRG.2633"; xloc "XLOC_001183"; class_code "u"; tss_id "TSS2032";	1	ensembl	CDS	180191671	180191750	.	-	2	gene_id "ENSSSCG00000036634"; gene_version "3"; transcript_id "ENSSSCT00000087108"; transcript_version "2"; exon_number "22"; gene_name "MAP4K5"; gene_source "ensembl"; gene_biotype "protein_coding"; transcript_name "MAP4K5-201"; transcript_source "ensembl"; transcript_biotype "protein_coding"; protein_id "ENSSSCP00000060345"; protein_version "2";
1	StringTie	transcript	180147405	180162756	.	+	.	transcript_id "MSTRG.2633.2"; gene_id "MSTRG.2633"; xloc "XLOC_001183"; class_code "u"; tss_id "TSS2032";	1	ensembl	exon	180191312	180191372	.	-	.	gene_id "ENSSSCG00000036634"; gene_version "3"; transcript_id "ENSSSCT00000087108"; transcript_version "2"; exon_number "23"; gene_name "MAP4K5"; gene_source "ensembl"; gene_biotype "protein_coding"; transcript_name "MAP4K5-201"; transcript_source "ensembl"; transcript_biotype "protein_coding"; exon_id "ENSSSCE00000363197"; exon_version "1";
1	StringTie	transcript	180147405	180162756	.	+	.	transcript_id "MSTRG.2633.2"; gene_id "MSTRG.2633"; xloc "XLOC_001183"; class_code "u"; tss_id "TSS2032";	1	ensembl	CDS	180191312	180191372	.	-	0	gene_id "ENSSSCG00000036634"; gene_version "3"; transcript_id "ENSSSCT00000087108"; transcript_version "2"; exon_number "23"; gene_name "MAP4K5"; gene_source "ensembl"; gene_biotype "protein_coding"; transcript_name "MAP4K5-201"; transcript_source "ensembl"; transcript_biotype "protein_coding"; protein_id "ENSSSCP00000060345"; protein_version "2";
1	StringTie	transcript	180147405	180162756	.	+	.	transcript_id "MSTRG.2633.2"; gene_id "MSTRG.2633"; xloc "XLOC_001183"; class_code "u"; tss_id "TSS2032";	1	ensembl	exon	180201578	180201636	.	-	.	gene_id "ENSSSCG00000036634"; gene_version "3"; transcript_id "ENSSSCT00000053912"; transcript_version "3"; exon_number "15"; gene_name "MAP4K5"; gene_source "ensembl"; gene_biotype "protein_coding"; transcript_name "MAP4K5-202"; transcript_source "ensembl"; transcript_biotype "protein_coding"; exon_id "ENSSSCE00000330908"; exon_version "1";
1	StringTie	transcript	180147405	180162756	.	+	.	transcript_id "MSTRG.2633.2"; gene_id "MSTRG.2633"; xloc "XLOC_001183"; class_code "u"; tss_id "TSS2032";	1	ensembl	CDS	180201578	180201636	.	-	2	gene_id "ENSSSCG00000036634"; gene_version "3"; transcript_id "ENSSSCT00000053912"; transcript_version "3"; exon_number "15"; gene_name "MAP4K5"; gene_source "ensembl"; gene_biotype "protein_coding"; transcript_name "MAP4K5-202"; transcript_source "ensembl"; transcript_biotype "protein_coding"; protein_id "ENSSSCP00000057390"; protein_version "3";
1	StringTie	transcript	180147405	180162756	.	+	.	transcript_id "MSTRG.2633.2"; gene_id "MSTRG.2633"; xloc "XLOC_001183"; class_code "u"; tss_id "TSS2032";	1	ensembl	exon	180200260	180200327	.	-	.	gene_id "ENSSSCG00000036634"; gene_version "3"; transcript_id "ENSSSCT00000053912"; transcript_version "3"; exon_number "16"; gene_name "MAP4K5"; gene_source "ensembl"; gene_biotype "protein_coding"; transcript_name "MAP4K5-202"; transcript_source "ensembl"; transcript_biotype "protein_coding"; exon_id "ENSSSCE00000327220"; exon_version "1";
1	StringTie	transcript	180147405	180162756	.	+	.	transcript_id "MSTRG.2633.2"; gene_id "MSTRG.2633"; xloc "XLOC_001183"; class_code "u"; tss_id "TSS2032";	1	ensembl	CDS	180200260	180200327	.	-	0	gene_id "ENSSSCG00000036634"; gene_version "3"; transcript_id "ENSSSCT00000053912"; transcript_version "3"; exon_number "16"; gene_name "MAP4K5"; gene_source "ensembl"; gene_biotype "protein_coding"; transcript_name "MAP4K5-202"; transcript_source "ensembl"; transcript_biotype "protein_coding"; protein_id "ENSSSCP00000057390"; protein_version "3";
1	StringTie	transcript	180147405	180162756	.	+	.	transcript_id "MSTRG.2633.2"; gene_id "MSTRG.2633"; xloc "XLOC_001183"; class_code "u"; tss_id "TSS2032";	1	ensembl	exon	180198281	180198323	.	-	.	gene_id "ENSSSCG00000036634"; gene_version "3"; transcript_id "ENSSSCT00000053912"; transcript_version "3"; exon_number "17"; gene_name "MAP4K5"; gene_source "ensembl"; gene_biotype "protein_coding"; transcript_name "MAP4K5-202"; transcript_source "ensembl"; transcript_biotype "protein_coding"; exon_id "ENSSSCE00000307716"; exon_version "1";
1	StringTie	transcript	180147405	180162756	.	+	.	transcript_id "MSTRG.2633.2"; gene_id "MSTRG.2633"; xloc "XLOC_001183"; class_code "u"; tss_id "TSS2032";	1	ensembl	CDS	180198281	180198323	.	-	1	gene_id "ENSSSCG00000036634"; gene_version "3"; transcript_id "ENSSSCT00000053912"; transcript_version "3"; exon_number "17"; gene_name "MAP4K5"; gene_source "ensembl"; gene_biotype "protein_coding"; transcript_name "MAP4K5-202"; transcript_source "ensembl"; transcript_biotype "protein_coding"; protein_id "ENSSSCP00000057390"; protein_version "3";
1	StringTie	transcript	180147405	180162756	.	+	.	transcript_id "MSTRG.2633.2"; gene_id "MSTRG.2633"; xloc "XLOC_001183"; class_code "u"; tss_id "TSS2032";	1	ensembl	exon	180197053	180197206	.	-	.	gene_id "ENSSSCG00000036634"; gene_version "3"; transcript_id "ENSSSCT00000053912"; transcript_version "3"; exon_number "18"; gene_name "MAP4K5"; gene_source "ensembl"; gene_biotype "protein_coding"; transcript_name "MAP4K5-202"; transcript_source "ensembl"; transcript_biotype "protein_coding"; exon_id "ENSSSCE00000302264"; exon_version "1";
1	StringTie	transcript	180147405	180162756	.	+	.	transcript_id "MSTRG.2633.2"; gene_id "MSTRG.2633"; xloc "XLOC_001183"; class_code "u"; tss_id "TSS2032";	1	ensembl	CDS	180197053	180197206	.	-	0	gene_id "ENSSSCG00000036634"; gene_version "3"; transcript_id "ENSSSCT00000053912"; transcript_version "3"; exon_number "18"; gene_name "MAP4K5"; gene_source "ensembl"; gene_biotype "protein_coding"; transcript_name "MAP4K5-202"; transcript_source "ensembl"; transcript_biotype "protein_coding"; protein_id "ENSSSCP00000057390"; protein_version "3";
1	StringTie	transcript	180147405	180162756	.	+	.	transcript_id "MSTRG.2633.2"; gene_id "MSTRG.2633"; xloc "XLOC_001183"; class_code "u"; tss_id "TSS2032";	1	ensembl	exon	180195673	180195770	.	-	.	gene_id "ENSSSCG00000036634"; gene_version "3"; transcript_id "ENSSSCT00000053912"; transcript_version "3"; exon_number "19"; gene_name "MAP4K5"; gene_source "ensembl"; gene_biotype "protein_coding"; transcript_name "MAP4K5-202"; transcript_source "ensembl"; transcript_biotype "protein_coding"; exon_id "ENSSSCE00000304470"; exon_version "1";
1	StringTie	transcript	180147405	180162756	.	+	.	transcript_id "MSTRG.2633.2"; gene_id "MSTRG.2633"; xloc "XLOC_001183"; class_code "u"; tss_id "TSS2032";	1	ensembl	CDS	180195673	180195770	.	-	2	gene_id "ENSSSCG00000036634"; gene_version "3"; transcript_id "ENSSSCT00000053912"; transcript_version "3"; exon_number "19"; gene_name "MAP4K5"; gene_source "ensembl"; gene_biotype "protein_coding"; transcript_name "MAP4K5-202"; transcript_source "ensembl"; transcript_biotype "protein_coding"; protein_id "ENSSSCP00000057390"; protein_version "3";
1	StringTie	transcript	180147405	180162756	.	+	.	transcript_id "MSTRG.2633.2"; gene_id "MSTRG.2633"; xloc "XLOC_001183"; class_code "u"; tss_id "TSS2032";	1	ensembl	exon	180195461	180195502	.	-	.	gene_id "ENSSSCG00000036634"; gene_version "3"; transcript_id "ENSSSCT00000053912"; transcript_version "3"; exon_number "20"; gene_name "MAP4K5"; gene_source "ensembl"; gene_biotype "protein_coding"; transcript_name "MAP4K5-202"; transcript_source "ensembl"; transcript_biotype "protein_coding"; exon_id "ENSSSCE00000357137"; exon_version "1";
1	StringTie	transcript	180147405	180162756	.	+	.	transcript_id "MSTRG.2633.2"; gene_id "MSTRG.2633"; xloc "XLOC_001183"; class_code "u"; tss_id "TSS2032";	1	ensembl	CDS	180195461	180195502	.	-	0	gene_id "ENSSSCG00000036634"; gene_version "3"; transcript_id "ENSSSCT00000053912"; transcript_version "3"; exon_number "20"; gene_name "MAP4K5"; gene_source "ensembl"; gene_biotype "protein_coding"; transcript_name "MAP4K5-202"; transcript_source "ensembl"; transcript_biotype "protein_coding"; protein_id "ENSSSCP00000057390"; protein_version "3";
1	StringTie	transcript	180147405	180162756	.	+	.	transcript_id "MSTRG.2633.2"; gene_id "MSTRG.2633"; xloc "XLOC_001183"; class_code "u"; tss_id "TSS2032";	1	ensembl	exon	180194125	180194209	.	-	.	gene_id "ENSSSCG00000036634"; gene_version "3"; transcript_id "ENSSSCT00000053912"; transcript_version "3"; exon_number "21"; gene_name "MAP4K5"; gene_source "ensembl"; gene_biotype "protein_coding"; transcript_name "MAP4K5-202"; transcript_source "ensembl"; transcript_biotype "protein_coding"; exon_id "ENSSSCE00000297736"; exon_version "1";
1	StringTie	transcript	180147405	180162756	.	+	.	transcript_id "MSTRG.2633.2"; gene_id "MSTRG.2633"; xloc "XLOC_001183"; class_code "u"; tss_id "TSS2032";	1	ensembl	CDS	180194125	180194209	.	-	0	gene_id "ENSSSCG00000036634"; gene_version "3"; transcript_id "ENSSSCT00000053912"; transcript_version "3"; exon_number "21"; gene_name "MAP4K5"; gene_source "ensembl"; gene_biotype "protein_coding"; transcript_name "MAP4K5-202"; transcript_source "ensembl"; transcript_biotype "protein_coding"; protein_id "ENSSSCP00000057390"; protein_version "3";
1	StringTie	transcript	180147405	180162756	.	+	.	transcript_id "MSTRG.2633.2"; gene_id "MSTRG.2633"; xloc "XLOC_001183"; class_code "u"; tss_id "TSS2032";	1	ensembl	exon	180191671	180191750	.	-	.	gene_id "ENSSSCG00000036634"; gene_version "3"; transcript_id "ENSSSCT00000053912"; transcript_version "3"; exon_number "22"; gene_name "MAP4K5"; gene_source "ensembl"; gene_biotype "protein_coding"; transcript_name "MAP4K5-202"; transcript_source "ensembl"; transcript_biotype "protein_coding"; exon_id "ENSSSCE00000310709"; exon_version "1";
1	StringTie	transcript	180147405	180162756	.	+	.	transcript_id "MSTRG.2633.2"; gene_id "MSTRG.2633"; xloc "XLOC_001183"; class_code "u"; tss_id "TSS2032";	1	ensembl	CDS	180191671	180191750	.	-	2	gene_id "ENSSSCG00000036634"; gene_version "3"; transcript_id "ENSSSCT00000053912"; transcript_version "3"; exon_number "22"; gene_name "MAP4K5"; gene_source "ensembl"; gene_biotype "protein_coding"; transcript_name "MAP4K5-202"; transcript_source "ensembl"; transcript_biotype "protein_coding"; protein_id "ENSSSCP00000057390"; protein_version "3";
1	StringTie	transcript	180147405	180162756	.	+	.	transcript_id "MSTRG.2633.2"; gene_id "MSTRG.2633"; xloc "XLOC_001183"; class_code "u"; tss_id "TSS2032";	1	ensembl	exon	180191312	180191372	.	-	.	gene_id "ENSSSCG00000036634"; gene_version "3"; transcript_id "ENSSSCT00000053912"; transcript_version "3"; exon_number "23"; gene_name "MAP4K5"; gene_source "ensembl"; gene_biotype "protein_coding"; transcript_name "MAP4K5-202"; transcript_source "ensembl"; transcript_biotype "protein_coding"; exon_id "ENSSSCE00000363197"; exon_version "1";
1	StringTie	transcript	180147405	180162756	.	+	.	transcript_id "MSTRG.2633.2"; gene_id "MSTRG.2633"; xloc "XLOC_001183"; class_code "u"; tss_id "TSS2032";	1	ensembl	CDS	180191312	180191372	.	-	0	gene_id "ENSSSCG00000036634"; gene_version "3"; transcript_id "ENSSSCT00000053912"; transcript_version "3"; exon_number "23"; gene_name "MAP4K5"; gene_source "ensembl"; gene_biotype "protein_coding"; transcript_name "MAP4K5-202"; transcript_source "ensembl"; transcript_biotype "protein_coding"; protein_id "ENSSSCP00000057390"; protein_version "3";
1	StringTie	transcript	180147405	180162756	.	+	.	transcript_id "MSTRG.2633.2"; gene_id "MSTRG.2633"; xloc "XLOC_001183"; class_code "u"; tss_id "TSS2032";	1	ensembl	exon	180209669	180209747	.	-	.	gene_id "ENSSSCG00000036634"; gene_version "3"; transcript_id "ENSSSCT00000087108"; transcript_version "2"; exon_number "14"; gene_name "MAP4K5"; gene_source "ensembl"; gene_biotype "protein_coding"; transcript_name "MAP4K5-201"; transcript_source "ensembl"; transcript_biotype "protein_coding"; exon_id "ENSSSCE00000339006"; exon_version "1";
1	StringTie	transcript	180147405	180162756	.	+	.	transcript_id "MSTRG.2633.2"; gene_id "MSTRG.2633"; xloc "XLOC_001183"; class_code "u"; tss_id "TSS2032";	1	ensembl	CDS	180209669	180209747	.	-	0	gene_id "ENSSSCG00000036634"; gene_version "3"; transcript_id "ENSSSCT00000087108"; transcript_version "2"; exon_number "14"; gene_name "MAP4K5"; gene_source "ensembl"; gene_biotype "protein_coding"; transcript_name "MAP4K5-201"; transcript_source "ensembl"; transcript_biotype "protein_coding"; protein_id "ENSSSCP00000060345"; protein_version "2";
1	StringTie	transcript	180147405	180162756	.	+	.	transcript_id "MSTRG.2633.2"; gene_id "MSTRG.2633"; xloc "XLOC_001183"; class_code "u"; tss_id "TSS2032";	1	ensembl	exon	180209669	180209747	.	-	.	gene_id "ENSSSCG00000036634"; gene_version "3"; transcript_id "ENSSSCT00000053912"; transcript_version "3"; exon_number "14"; gene_name "MAP4K5"; gene_source "ensembl"; gene_biotype "protein_coding"; transcript_name "MAP4K5-202"; transcript_source "ensembl"; transcript_biotype "protein_coding"; exon_id "ENSSSCE00000339006"; exon_version "1";
1	StringTie	transcript	180147405	180162756	.	+	.	transcript_id "MSTRG.2633.2"; gene_id "MSTRG.2633"; xloc "XLOC_001183"; class_code "u"; tss_id "TSS2032";	1	ensembl	CDS	180209669	180209747	.	-	0	gene_id "ENSSSCG00000036634"; gene_version "3"; transcript_id "ENSSSCT00000053912"; transcript_version "3"; exon_number "14"; gene_name "MAP4K5"; gene_source "ensembl"; gene_biotype "protein_coding"; transcript_name "MAP4K5-202"; transcript_source "ensembl"; transcript_biotype "protein_coding"; protein_id "ENSSSCP00000057390"; protein_version "3";
1	StringTie	transcript	180147405	180162756	.	+	.	transcript_id "MSTRG.2633.2"; gene_id "MSTRG.2633"; xloc "XLOC_001183"; class_code "u"; tss_id "TSS2032";	1	ensembl	exon	180237082	180237129	.	-	.	gene_id "ENSSSCG00000036634"; gene_version "3"; transcript_id "ENSSSCT00000087108"; transcript_version "2"; exon_number "7"; gene_name "MAP4K5"; gene_source "ensembl"; gene_biotype "protein_coding"; transcript_name "MAP4K5-201"; transcript_source "ensembl"; transcript_biotype "protein_coding"; exon_id "ENSSSCE00000284713"; exon_version "1";
1	StringTie	transcript	180147405	180162756	.	+	.	transcript_id "MSTRG.2633.2"; gene_id "MSTRG.2633"; xloc "XLOC_001183"; class_code "u"; tss_id "TSS2032";	1	ensembl	CDS	180237082	180237129	.	-	0	gene_id "ENSSSCG00000036634"; gene_version "3"; transcript_id "ENSSSCT00000087108"; transcript_version "2"; exon_number "7"; gene_name "MAP4K5"; gene_source "ensembl"; gene_biotype "protein_coding"; transcript_name "MAP4K5-201"; transcript_source "ensembl"; transcript_biotype "protein_coding"; protein_id "ENSSSCP00000060345"; protein_version "2";
1	StringTie	transcript	180147405	180162756	.	+	.	transcript_id "MSTRG.2633.2"; gene_id "MSTRG.2633"; xloc "XLOC_001183"; class_code "u"; tss_id "TSS2032";	1	ensembl	exon	180236945	180236987	.	-	.	gene_id "ENSSSCG00000036634"; gene_version "3"; transcript_id "ENSSSCT00000087108"; transcript_version "2"; exon_number "8"; gene_name "MAP4K5"; gene_source "ensembl"; gene_biotype "protein_coding"; transcript_name "MAP4K5-201"; transcript_source "ensembl"; transcript_biotype "protein_coding"; exon_id "ENSSSCE00000331520"; exon_version "1";
1	StringTie	transcript	180147405	180162756	.	+	.	transcript_id "MSTRG.2633.2"; gene_id "MSTRG.2633"; xloc "XLOC_001183"; class_code "u"; tss_id "TSS2032";	1	ensembl	CDS	180236945	180236987	.	-	0	gene_id "ENSSSCG00000036634"; gene_version "3"; transcript_id "ENSSSCT00000087108"; transcript_version "2"; exon_number "8"; gene_name "MAP4K5"; gene_source "ensembl"; gene_biotype "protein_coding"; transcript_name "MAP4K5-201"; transcript_source "ensembl"; transcript_biotype "protein_coding"; protein_id "ENSSSCP00000060345"; protein_version "2";
1	StringTie	transcript	180147405	180162756	.	+	.	transcript_id "MSTRG.2633.2"; gene_id "MSTRG.2633"; xloc "XLOC_001183"; class_code "u"; tss_id "TSS2032";	1	ensembl	exon	180236106	180236178	.	-	.	gene_id "ENSSSCG00000036634"; gene_version "3"; transcript_id "ENSSSCT00000087108"; transcript_version "2"; exon_number "9"; gene_name "MAP4K5"; gene_source "ensembl"; gene_biotype "protein_coding"; transcript_name "MAP4K5-201"; transcript_source "ensembl"; transcript_biotype "protein_coding"; exon_id "ENSSSCE00000266671"; exon_version "1";
1	StringTie	transcript	180147405	180162756	.	+	.	transcript_id "MSTRG.2633.2"; gene_id "MSTRG.2633"; xloc "XLOC_001183"; class_code "u"; tss_id "TSS2032";	1	ensembl	CDS	180236106	180236178	.	-	2	gene_id "ENSSSCG00000036634"; gene_version "3"; transcript_id "ENSSSCT00000087108"; transcript_version "2"; exon_number "9"; gene_name "MAP4K5"; gene_source "ensembl"; gene_biotype "protein_coding"; transcript_name "MAP4K5-201"; transcript_source "ensembl"; transcript_biotype "protein_coding"; protein_id "ENSSSCP00000060345"; protein_version "2";
1	StringTie	transcript	180147405	180162756	.	+	.	transcript_id "MSTRG.2633.2"; gene_id "MSTRG.2633"; xloc "XLOC_001183"; class_code "u"; tss_id "TSS2032";	1	ensembl	exon	180229237	180229368	.	-	.	gene_id "ENSSSCG00000036634"; gene_version "3"; transcript_id "ENSSSCT00000087108"; transcript_version "2"; exon_number "10"; gene_name "MAP4K5"; gene_source "ensembl"; gene_biotype "protein_coding"; transcript_name "MAP4K5-201"; transcript_source "ensembl"; transcript_biotype "protein_coding"; exon_id "ENSSSCE00000237902"; exon_version "2";
1	StringTie	transcript	180147405	180162756	.	+	.	transcript_id "MSTRG.2633.2"; gene_id "MSTRG.2633"; xloc "XLOC_001183"; class_code "u"; tss_id "TSS2032";	1	ensembl	CDS	180229237	180229368	.	-	1	gene_id "ENSSSCG00000036634"; gene_version "3"; transcript_id "ENSSSCT00000087108"; transcript_version "2"; exon_number "10"; gene_name "MAP4K5"; gene_source "ensembl"; gene_biotype "protein_coding"; transcript_name "MAP4K5-201"; transcript_source "ensembl"; transcript_biotype "protein_coding"; protein_id "ENSSSCP00000060345"; protein_version "2";
1	StringTie	transcript	180147405	180162756	.	+	.	transcript_id "MSTRG.2633.2"; gene_id "MSTRG.2633"; xloc "XLOC_001183"; class_code "u"; tss_id "TSS2032";	1	ensembl	exon	180227271	180227333	.	-	.	gene_id "ENSSSCG00000036634"; gene_version "3"; transcript_id "ENSSSCT00000087108"; transcript_version "2"; exon_number "11"; gene_name "MAP4K5"; gene_source "ensembl"; gene_biotype "protein_coding"; transcript_name "MAP4K5-201"; transcript_source "ensembl"; transcript_biotype "protein_coding"; exon_id "ENSSSCE00000202015"; exon_version "2";
1	StringTie	transcript	180147405	180162756	.	+	.	transcript_id "MSTRG.2633.2"; gene_id "MSTRG.2633"; xloc "XLOC_001183"; class_code "u"; tss_id "TSS2032";	1	ensembl	CDS	180227271	180227333	.	-	1	gene_id "ENSSSCG00000036634"; gene_version "3"; transcript_id "ENSSSCT00000087108"; transcript_version "2"; exon_number "11"; gene_name "MAP4K5"; gene_source "ensembl"; gene_biotype "protein_coding"; transcript_name "MAP4K5-201"; transcript_source "ensembl"; transcript_biotype "protein_coding"; protein_id "ENSSSCP00000060345"; protein_version "2";
1	StringTie	transcript	180147405	180162756	.	+	.	transcript_id "MSTRG.2633.2"; gene_id "MSTRG.2633"; xloc "XLOC_001183"; class_code "u"; tss_id "TSS2032";	1	ensembl	exon	180225005	180225086	.	-	.	gene_id "ENSSSCG00000036634"; gene_version "3"; transcript_id "ENSSSCT00000087108"; transcript_version "2"; exon_number "12"; gene_name "MAP4K5"; gene_source "ensembl"; gene_biotype "protein_coding"; transcript_name "MAP4K5-201"; transcript_source "ensembl"; transcript_biotype "protein_coding"; exon_id "ENSSSCE00000239453"; exon_version "2";
1	StringTie	transcript	180147405	180162756	.	+	.	transcript_id "MSTRG.2633.2"; gene_id "MSTRG.2633"; xloc "XLOC_001183"; class_code "u"; tss_id "TSS2032";	1	ensembl	CDS	180225005	180225086	.	-	1	gene_id "ENSSSCG00000036634"; gene_version "3"; transcript_id "ENSSSCT00000087108"; transcript_version "2"; exon_number "12"; gene_name "MAP4K5"; gene_source "ensembl"; gene_biotype "protein_coding"; transcript_name "MAP4K5-201"; transcript_source "ensembl"; transcript_biotype "protein_coding"; protein_id "ENSSSCP00000060345"; protein_version "2";
1	StringTie	transcript	180147405	180162756	.	+	.	transcript_id "MSTRG.2633.2"; gene_id "MSTRG.2633"; xloc "XLOC_001183"; class_code "u"; tss_id "TSS2032";	1	ensembl	exon	180237082	180237129	.	-	.	gene_id "ENSSSCG00000036634"; gene_version "3"; transcript_id "ENSSSCT00000053912"; transcript_version "3"; exon_number "7"; gene_name "MAP4K5"; gene_source "ensembl"; gene_biotype "protein_coding"; transcript_name "MAP4K5-202"; transcript_source "ensembl"; transcript_biotype "protein_coding"; exon_id "ENSSSCE00000284713"; exon_version "1";
1	StringTie	transcript	180147405	180162756	.	+	.	transcript_id "MSTRG.2633.2"; gene_id "MSTRG.2633"; xloc "XLOC_001183"; class_code "u"; tss_id "TSS2032";	1	ensembl	CDS	180237082	180237129	.	-	0	gene_id "ENSSSCG00000036634"; gene_version "3"; transcript_id "ENSSSCT00000053912"; transcript_version "3"; exon_number "7"; gene_name "MAP4K5"; gene_source "ensembl"; gene_biotype "protein_coding"; transcript_name "MAP4K5-202"; transcript_source "ensembl"; transcript_biotype "protein_coding"; protein_id "ENSSSCP00000057390"; protein_version "3";
1	StringTie	transcript	180147405	180162756	.	+	.	transcript_id "MSTRG.2633.2"; gene_id "MSTRG.2633"; xloc "XLOC_001183"; class_code "u"; tss_id "TSS2032";	1	ensembl	exon	180236945	180236987	.	-	.	gene_id "ENSSSCG00000036634"; gene_version "3"; transcript_id "ENSSSCT00000053912"; transcript_version "3"; exon_number "8"; gene_name "MAP4K5"; gene_source "ensembl"; gene_biotype "protein_coding"; transcript_name "MAP4K5-202"; transcript_source "ensembl"; transcript_biotype "protein_coding"; exon_id "ENSSSCE00000331520"; exon_version "1";
1	StringTie	transcript	180147405	180162756	.	+	.	transcript_id "MSTRG.2633.2"; gene_id "MSTRG.2633"; xloc "XLOC_001183"; class_code "u"; tss_id "TSS2032";	1	ensembl	CDS	180236945	180236987	.	-	0	gene_id "ENSSSCG00000036634"; gene_version "3"; transcript_id "ENSSSCT00000053912"; transcript_version "3"; exon_number "8"; gene_name "MAP4K5"; gene_source "ensembl"; gene_biotype "protein_coding"; transcript_name "MAP4K5-202"; transcript_source "ensembl"; transcript_biotype "protein_coding"; protein_id "ENSSSCP00000057390"; protein_version "3";
1	StringTie	transcript	180147405	180162756	.	+	.	transcript_id "MSTRG.2633.2"; gene_id "MSTRG.2633"; xloc "XLOC_001183"; class_code "u"; tss_id "TSS2032";	1	ensembl	exon	180236106	180236178	.	-	.	gene_id "ENSSSCG00000036634"; gene_version "3"; transcript_id "ENSSSCT00000053912"; transcript_version "3"; exon_number "9"; gene_name "MAP4K5"; gene_source "ensembl"; gene_biotype "protein_coding"; transcript_name "MAP4K5-202"; transcript_source "ensembl"; transcript_biotype "protein_coding"; exon_id "ENSSSCE00000266671"; exon_version "1";
1	StringTie	transcript	180147405	180162756	.	+	.	transcript_id "MSTRG.2633.2"; gene_id "MSTRG.2633"; xloc "XLOC_001183"; class_code "u"; tss_id "TSS2032";	1	ensembl	CDS	180236106	180236178	.	-	2	gene_id "ENSSSCG00000036634"; gene_version "3"; transcript_id "ENSSSCT00000053912"; transcript_version "3"; exon_number "9"; gene_name "MAP4K5"; gene_source "ensembl"; gene_biotype "protein_coding"; transcript_name "MAP4K5-202"; transcript_source "ensembl"; transcript_biotype "protein_coding"; protein_id "ENSSSCP00000057390"; protein_version "3";
1	StringTie	transcript	180147405	180162756	.	+	.	transcript_id "MSTRG.2633.2"; gene_id "MSTRG.2633"; xloc "XLOC_001183"; class_code "u"; tss_id "TSS2032";	1	ensembl	exon	180229237	180229368	.	-	.	gene_id "ENSSSCG00000036634"; gene_version "3"; transcript_id "ENSSSCT00000053912"; transcript_version "3"; exon_number "10"; gene_name "MAP4K5"; gene_source "ensembl"; gene_biotype "protein_coding"; transcript_name "MAP4K5-202"; transcript_source "ensembl"; transcript_biotype "protein_coding"; exon_id "ENSSSCE00000237902"; exon_version "2";
1	StringTie	transcript	180147405	180162756	.	+	.	transcript_id "MSTRG.2633.2"; gene_id "MSTRG.2633"; xloc "XLOC_001183"; class_code "u"; tss_id "TSS2032";	1	ensembl	CDS	180229237	180229368	.	-	1	gene_id "ENSSSCG00000036634"; gene_version "3"; transcript_id "ENSSSCT00000053912"; transcript_version "3"; exon_number "10"; gene_name "MAP4K5"; gene_source "ensembl"; gene_biotype "protein_coding"; transcript_name "MAP4K5-202"; transcript_source "ensembl"; transcript_biotype "protein_coding"; protein_id "ENSSSCP00000057390"; protein_version "3";
1	StringTie	transcript	180147405	180162756	.	+	.	transcript_id "MSTRG.2633.2"; gene_id "MSTRG.2633"; xloc "XLOC_001183"; class_code "u"; tss_id "TSS2032";	1	ensembl	exon	180227271	180227333	.	-	.	gene_id "ENSSSCG00000036634"; gene_version "3"; transcript_id "ENSSSCT00000053912"; transcript_version "3"; exon_number "11"; gene_name "MAP4K5"; gene_source "ensembl"; gene_biotype "protein_coding"; transcript_name "MAP4K5-202"; transcript_source "ensembl"; transcript_biotype "protein_coding"; exon_id "ENSSSCE00000202015"; exon_version "2";
1	StringTie	transcript	180147405	180162756	.	+	.	transcript_id "MSTRG.2633.2"; gene_id "MSTRG.2633"; xloc "XLOC_001183"; class_code "u"; tss_id "TSS2032";	1	ensembl	CDS	180227271	180227333	.	-	1	gene_id "ENSSSCG00000036634"; gene_version "3"; transcript_id "ENSSSCT00000053912"; transcript_version "3"; exon_number "11"; gene_name "MAP4K5"; gene_source "ensembl"; gene_biotype "protein_coding"; transcript_name "MAP4K5-202"; transcript_source "ensembl"; transcript_biotype "protein_coding"; protein_id "ENSSSCP00000057390"; protein_version "3";
1	StringTie	transcript	180147405	180162756	.	+	.	transcript_id "MSTRG.2633.2"; gene_id "MSTRG.2633"; xloc "XLOC_001183"; class_code "u"; tss_id "TSS2032";	1	ensembl	exon	180225005	180225086	.	-	.	gene_id "ENSSSCG00000036634"; gene_version "3"; transcript_id "ENSSSCT00000053912"; transcript_version "3"; exon_number "12"; gene_name "MAP4K5"; gene_source "ensembl"; gene_biotype "protein_coding"; transcript_name "MAP4K5-202"; transcript_source "ensembl"; transcript_biotype "protein_coding"; exon_id "ENSSSCE00000239453"; exon_version "2";
1	StringTie	transcript	180147405	180162756	.	+	.	transcript_id "MSTRG.2633.2"; gene_id "MSTRG.2633"; xloc "XLOC_001183"; class_code "u"; tss_id "TSS2032";	1	ensembl	CDS	180225005	180225086	.	-	1	gene_id "ENSSSCG00000036634"; gene_version "3"; transcript_id "ENSSSCT00000053912"; transcript_version "3"; exon_number "12"; gene_name "MAP4K5"; gene_source "ensembl"; gene_biotype "protein_coding"; transcript_name "MAP4K5-202"; transcript_source "ensembl"; transcript_biotype "protein_coding"; protein_id "ENSSSCP00000057390"; protein_version "3";
1	StringTie	transcript	180147405	180162756	.	+	.	transcript_id "MSTRG.2633.2"; gene_id "MSTRG.2633"; xloc "XLOC_001183"; class_code "u"; tss_id "TSS2032";	1	ensembl	exon	180248420	180248510	.	-	.	gene_id "ENSSSCG00000036634"; gene_version "3"; transcript_id "ENSSSCT00000087108"; transcript_version "2"; exon_number "4"; gene_name "MAP4K5"; gene_source "ensembl"; gene_biotype "protein_coding"; transcript_name "MAP4K5-201"; transcript_source "ensembl"; transcript_biotype "protein_coding"; exon_id "ENSSSCE00000515096"; exon_version "1";
1	StringTie	transcript	180147405	180162756	.	+	.	transcript_id "MSTRG.2633.2"; gene_id "MSTRG.2633"; xloc "XLOC_001183"; class_code "u"; tss_id "TSS2032";	1	ensembl	CDS	180248420	180248510	.	-	2	gene_id "ENSSSCG00000036634"; gene_version "3"; transcript_id "ENSSSCT00000087108"; transcript_version "2"; exon_number "4"; gene_name "MAP4K5"; gene_source "ensembl"; gene_biotype "protein_coding"; transcript_name "MAP4K5-201"; transcript_source "ensembl"; transcript_biotype "protein_coding"; protein_id "ENSSSCP00000060345"; protein_version "2";
1	StringTie	transcript	180147405	180162756	.	+	.	transcript_id "MSTRG.2633.2"; gene_id "MSTRG.2633"; xloc "XLOC_001183"; class_code "u"; tss_id "TSS2032";	1	ensembl	exon	180247902	180247966	.	-	.	gene_id "ENSSSCG00000036634"; gene_version "3"; transcript_id "ENSSSCT00000087108"; transcript_version "2"; exon_number "5"; gene_name "MAP4K5"; gene_source "ensembl"; gene_biotype "protein_coding"; transcript_name "MAP4K5-201"; transcript_source "ensembl"; transcript_biotype "protein_coding"; exon_id "ENSSSCE00000215435"; exon_version "2";
1	StringTie	transcript	180147405	180162756	.	+	.	transcript_id "MSTRG.2633.2"; gene_id "MSTRG.2633"; xloc "XLOC_001183"; class_code "u"; tss_id "TSS2032";	1	ensembl	CDS	180247902	180247966	.	-	1	gene_id "ENSSSCG00000036634"; gene_version "3"; transcript_id "ENSSSCT00000087108"; transcript_version "2"; exon_number "5"; gene_name "MAP4K5"; gene_source "ensembl"; gene_biotype "protein_coding"; transcript_name "MAP4K5-201"; transcript_source "ensembl"; transcript_biotype "protein_coding"; protein_id "ENSSSCP00000060345"; protein_version "2";
1	StringTie	transcript	180147405	180162756	.	+	.	transcript_id "MSTRG.2633.2"; gene_id "MSTRG.2633"; xloc "XLOC_001183"; class_code "u"; tss_id "TSS2032";	1	ensembl	exon	180242169	180242224	.	-	.	gene_id "ENSSSCG00000036634"; gene_version "3"; transcript_id "ENSSSCT00000087108"; transcript_version "2"; exon_number "6"; gene_name "MAP4K5"; gene_source "ensembl"; gene_biotype "protein_coding"; transcript_name "MAP4K5-201"; transcript_source "ensembl"; transcript_biotype "protein_coding"; exon_id "ENSSSCE00000310900"; exon_version "1";
1	StringTie	transcript	180147405	180162756	.	+	.	transcript_id "MSTRG.2633.2"; gene_id "MSTRG.2633"; xloc "XLOC_001183"; class_code "u"; tss_id "TSS2032";	1	ensembl	CDS	180242169	180242224	.	-	2	gene_id "ENSSSCG00000036634"; gene_version "3"; transcript_id "ENSSSCT00000087108"; transcript_version "2"; exon_number "6"; gene_name "MAP4K5"; gene_source "ensembl"; gene_biotype "protein_coding"; transcript_name "MAP4K5-201"; transcript_source "ensembl"; transcript_biotype "protein_coding"; protein_id "ENSSSCP00000060345"; protein_version "2";
1	StringTie	transcript	180147405	180162756	.	+	.	transcript_id "MSTRG.2633.2"; gene_id "MSTRG.2633"; xloc "XLOC_001183"; class_code "u"; tss_id "TSS2032";	1	ensembl	exon	180248420	180248510	.	-	.	gene_id "ENSSSCG00000036634"; gene_version "3"; transcript_id "ENSSSCT00000053912"; transcript_version "3"; exon_number "4"; gene_name "MAP4K5"; gene_source "ensembl"; gene_biotype "protein_coding"; transcript_name "MAP4K5-202"; transcript_source "ensembl"; transcript_biotype "protein_coding"; exon_id "ENSSSCE00000515096"; exon_version "1";
1	StringTie	transcript	180147405	180162756	.	+	.	transcript_id "MSTRG.2633.2"; gene_id "MSTRG.2633"; xloc "XLOC_001183"; class_code "u"; tss_id "TSS2032";	1	ensembl	CDS	180248420	180248510	.	-	2	gene_id "ENSSSCG00000036634"; gene_version "3"; transcript_id "ENSSSCT00000053912"; transcript_version "3"; exon_number "4"; gene_name "MAP4K5"; gene_source "ensembl"; gene_biotype "protein_coding"; transcript_name "MAP4K5-202"; transcript_source "ensembl"; transcript_biotype "protein_coding"; protein_id "ENSSSCP00000057390"; protein_version "3";
1	StringTie	transcript	180147405	180162756	.	+	.	transcript_id "MSTRG.2633.2"; gene_id "MSTRG.2633"; xloc "XLOC_001183"; class_code "u"; tss_id "TSS2032";	1	ensembl	exon	180247902	180247966	.	-	.	gene_id "ENSSSCG00000036634"; gene_version "3"; transcript_id "ENSSSCT00000053912"; transcript_version "3"; exon_number "5"; gene_name "MAP4K5"; gene_source "ensembl"; gene_biotype "protein_coding"; transcript_name "MAP4K5-202"; transcript_source "ensembl"; transcript_biotype "protein_coding"; exon_id "ENSSSCE00000215435"; exon_version "2";
1	StringTie	transcript	180147405	180162756	.	+	.	transcript_id "MSTRG.2633.2"; gene_id "MSTRG.2633"; xloc "XLOC_001183"; class_code "u"; tss_id "TSS2032";	1	ensembl	CDS	180247902	180247966	.	-	1	gene_id "ENSSSCG00000036634"; gene_version "3"; transcript_id "ENSSSCT00000053912"; transcript_version "3"; exon_number "5"; gene_name "MAP4K5"; gene_source "ensembl"; gene_biotype "protein_coding"; transcript_name "MAP4K5-202"; transcript_source "ensembl"; transcript_biotype "protein_coding"; protein_id "ENSSSCP00000057390"; protein_version "3";
1	StringTie	transcript	180147405	180162756	.	+	.	transcript_id "MSTRG.2633.2"; gene_id "MSTRG.2633"; xloc "XLOC_001183"; class_code "u"; tss_id "TSS2032";	1	ensembl	exon	180242169	180242224	.	-	.	gene_id "ENSSSCG00000036634"; gene_version "3"; transcript_id "ENSSSCT00000053912"; transcript_version "3"; exon_number "6"; gene_name "MAP4K5"; gene_source "ensembl"; gene_biotype "protein_coding"; transcript_name "MAP4K5-202"; transcript_source "ensembl"; transcript_biotype "protein_coding"; exon_id "ENSSSCE00000310900"; exon_version "1";
1	StringTie	transcript	180147405	180162756	.	+	.	transcript_id "MSTRG.2633.2"; gene_id "MSTRG.2633"; xloc "XLOC_001183"; class_code "u"; tss_id "TSS2032";	1	ensembl	CDS	180242169	180242224	.	-	2	gene_id "ENSSSCG00000036634"; gene_version "3"; transcript_id "ENSSSCT00000053912"; transcript_version "3"; exon_number "6"; gene_name "MAP4K5"; gene_source "ensembl"; gene_biotype "protein_coding"; transcript_name "MAP4K5-202"; transcript_source "ensembl"; transcript_biotype "protein_coding"; protein_id "ENSSSCP00000057390"; protein_version "3";
1	StringTie	transcript	180147405	180162756	.	+	.	transcript_id "MSTRG.2633.2"; gene_id "MSTRG.2633"; xloc "XLOC_001183"; class_code "u"; tss_id "TSS2032";	1	ensembl	gene	180261624	180266784	.	-	.	gene_id "ENSSSCG00000048049"; gene_version "1"; gene_source "ensembl"; gene_biotype "protein_coding";
1	StringTie	transcript	180147405	180162756	.	+	.	transcript_id "MSTRG.2633.2"; gene_id "MSTRG.2633"; xloc "XLOC_001183"; class_code "u"; tss_id "TSS2032";	1	ensembl	transcript	180261624	180266784	.	-	.	gene_id "ENSSSCG00000048049"; gene_version "1"; transcript_id "ENSSSCT00000085605"; transcript_version "1"; gene_source "ensembl"; gene_biotype "protein_coding"; transcript_source "ensembl"; transcript_biotype "protein_coding";
1	StringTie	transcript	180147405	180162756	.	+	.	transcript_id "MSTRG.2633.2"; gene_id "MSTRG.2633"; xloc "XLOC_001183"; class_code "u"; tss_id "TSS2032";	1	ensembl	exon	180261624	180263981	.	-	.	gene_id "ENSSSCG00000048049"; gene_version "1"; transcript_id "ENSSSCT00000085605"; transcript_version "1"; exon_number "2"; gene_source "ensembl"; gene_biotype "protein_coding"; transcript_source "ensembl"; transcript_biotype "protein_coding"; exon_id "ENSSSCE00000461532"; exon_version "1";
1	StringTie	transcript	180147405	180162756	.	+	.	transcript_id "MSTRG.2633.2"; gene_id "MSTRG.2633"; xloc "XLOC_001183"; class_code "u"; tss_id "TSS2032";	1	ensembl	CDS	180262240	180262821	.	-	0	gene_id "ENSSSCG00000048049"; gene_version "1"; transcript_id "ENSSSCT00000085605"; transcript_version "1"; exon_number "2"; gene_source "ensembl"; gene_biotype "protein_coding"; transcript_source "ensembl"; transcript_biotype "protein_coding"; protein_id "ENSSSCP00000081037"; protein_version "1";
1	StringTie	transcript	180147405	180162756	.	+	.	transcript_id "MSTRG.2633.2"; gene_id "MSTRG.2633"; xloc "XLOC_001183"; class_code "u"; tss_id "TSS2032";	1	ensembl	stop_codon	180262237	180262239	.	-	0	gene_id "ENSSSCG00000048049"; gene_version "1"; transcript_id "ENSSSCT00000085605"; transcript_version "1"; exon_number "2"; gene_source "ensembl"; gene_biotype "protein_coding"; transcript_source "ensembl"; transcript_biotype "protein_coding";
1	StringTie	transcript	180147405	180162756	.	+	.	transcript_id "MSTRG.2633.2"; gene_id "MSTRG.2633"; xloc "XLOC_001183"; class_code "u"; tss_id "TSS2032";	1	ensembl	three_prime_utr	180261624	180262236	.	-	.	gene_id "ENSSSCG00000048049"; gene_version "1"; transcript_id "ENSSSCT00000085605"; transcript_version "1"; gene_source "ensembl"; gene_biotype "protein_coding"; transcript_source "ensembl"; transcript_biotype "protein_coding";
1	StringTie	transcript	180147405	180162756	.	+	.	transcript_id "MSTRG.2633.2"; gene_id "MSTRG.2633"; xloc "XLOC_001183"; class_code "u"; tss_id "TSS2032";	1	ensembl	gene	180020863	180069146	.	-	.	gene_id "ENSSSCG00000005016"; gene_version "5"; gene_name "L2HGDH"; gene_source "ensembl"; gene_biotype "protein_coding";
1	StringTie	transcript	180147405	180162756	.	+	.	transcript_id "MSTRG.2633.2"; gene_id "MSTRG.2633"; xloc "XLOC_001183"; class_code "u"; tss_id "TSS2032";	1	ensembl	transcript	180028101	180069146	.	-	.	gene_id "ENSSSCG00000005016"; gene_version "5"; transcript_id "ENSSSCT00000058026"; transcript_version "3"; gene_name "L2HGDH"; gene_source "ensembl"; gene_biotype "protein_coding"; transcript_name "L2HGDH-201"; transcript_source "ensembl"; transcript_biotype "protein_coding";
1	StringTie	transcript	180147405	180162756	.	+	.	transcript_id "MSTRG.2633.2"; gene_id "MSTRG.2633"; xloc "XLOC_001183"; class_code "u"; tss_id "TSS2032";	1	ensembl	transcript	180026336	180069146	.	-	.	gene_id "ENSSSCG00000005016"; gene_version "5"; transcript_id "ENSSSCT00000063003"; transcript_version "3"; gene_name "L2HGDH"; gene_source "ensembl"; gene_biotype "protein_coding"; transcript_name "L2HGDH-202"; transcript_source "ensembl"; transcript_biotype "protein_coding";
1	StringTie	transcript	180147405	180162756	.	+	.	transcript_id "MSTRG.2633.2"; gene_id "MSTRG.2633"; xloc "XLOC_001183"; class_code "u"; tss_id "TSS2032";	1	ensembl	transcript	180022721	180069146	.	-	.	gene_id "ENSSSCG00000005016"; gene_version "5"; transcript_id "ENSSSCT00000005532"; transcript_version "4"; gene_name "L2HGDH"; gene_source "ensembl"; gene_biotype "protein_coding"; transcript_name "L2HGDH-203"; transcript_source "ensembl"; transcript_biotype "protein_coding";
1	StringTie	transcript	180147405	180162756	.	+	.	transcript_id "MSTRG.2633.2"; gene_id "MSTRG.2633"; xloc "XLOC_001183"; class_code "u"; tss_id "TSS2032";	1	ensembl	transcript	180020863	180069099	.	-	.	gene_id "ENSSSCG00000005016"; gene_version "5"; transcript_id "ENSSSCT00000079344"; transcript_version "2"; gene_name "L2HGDH"; gene_source "ensembl"; gene_biotype "protein_coding"; transcript_name "L2HGDH-204"; transcript_source "ensembl"; transcript_biotype "protein_coding";
1	StringTie	transcript	180147405	180162756	.	+	.	transcript_id "MSTRG.2633.2"; gene_id "MSTRG.2633"; xloc "XLOC_001183"; class_code "u"; tss_id "TSS2032";	1	ensembl	gene	180068973	180081412	.	+	.	gene_id "ENSSSCG00000031354"; gene_version "3"; gene_name "DMAC2L"; gene_source "ensembl"; gene_biotype "protein_coding";
1	StringTie	transcript	180147405	180162756	.	+	.	transcript_id "MSTRG.2633.2"; gene_id "MSTRG.2633"; xloc "XLOC_001183"; class_code "u"; tss_id "TSS2032";	1	ensembl	transcript	180069248	180076888	.	+	.	gene_id "ENSSSCG00000031354"; gene_version "3"; transcript_id "ENSSSCT00000094980"; transcript_version "1"; gene_name "DMAC2L"; gene_source "ensembl"; gene_biotype "protein_coding"; transcript_name "DMAC2L-201"; transcript_source "ensembl"; transcript_biotype "protein_coding";
1	StringTie	transcript	180147405	180162756	.	+	.	transcript_id "MSTRG.2633.2"; gene_id "MSTRG.2633"; xloc "XLOC_001183"; class_code "u"; tss_id "TSS2032";	1	ensembl	transcript	180069248	180079883	.	+	.	gene_id "ENSSSCG00000031354"; gene_version "3"; transcript_id "ENSSSCT00000094790"; transcript_version "1"; gene_name "DMAC2L"; gene_source "ensembl"; gene_biotype "protein_coding"; transcript_name "DMAC2L-202"; transcript_source "ensembl"; transcript_biotype "protein_coding";
1	StringTie	transcript	180147405	180162756	.	+	.	transcript_id "MSTRG.2633.2"; gene_id "MSTRG.2633"; xloc "XLOC_001183"; class_code "u"; tss_id "TSS2032";	1	ensembl	transcript	180069245	180081404	.	+	.	gene_id "ENSSSCG00000031354"; gene_version "3"; transcript_id "ENSSSCT00000041018"; transcript_version "3"; gene_name "DMAC2L"; gene_source "ensembl"; gene_biotype "protein_coding"; transcript_name "DMAC2L-203"; transcript_source "ensembl"; transcript_biotype "protein_coding";
1	StringTie	transcript	180147405	180162756	.	+	.	transcript_id "MSTRG.2633.2"; gene_id "MSTRG.2633"; xloc "XLOC_001183"; class_code "u"; tss_id "TSS2032";	1	ensembl	transcript	180068973	180081412	.	+	.	gene_id "ENSSSCG00000031354"; gene_version "3"; transcript_id "ENSSSCT00000039137"; transcript_version "2"; gene_name "DMAC2L"; gene_source "ensembl"; gene_biotype "protein_coding"; transcript_name "DMAC2L-204"; transcript_source "ensembl"; transcript_biotype "protein_coding";
1	StringTie	transcript	180147405	180162756	.	+	.	transcript_id "MSTRG.2633.2"; gene_id "MSTRG.2633"; xloc "XLOC_001183"; class_code "u"; tss_id "TSS2032";	1	ensembl	gene	180078659	180145054	.	-	.	gene_id "ENSSSCG00000034516"; gene_version "3"; gene_name "CDKL1"; gene_source "ensembl"; gene_biotype "protein_coding";
1	StringTie	transcript	180147405	180162756	.	+	.	transcript_id "MSTRG.2633.2"; gene_id "MSTRG.2633"; xloc "XLOC_001183"; class_code "u"; tss_id "TSS2032";	1	ensembl	transcript	180086618	180145054	.	-	.	gene_id "ENSSSCG00000034516"; gene_version "3"; transcript_id "ENSSSCT00000078310"; transcript_version "2"; gene_name "CDKL1"; gene_source "ensembl"; gene_biotype "protein_coding"; transcript_name "CDKL1-201"; transcript_source "ensembl"; transcript_biotype "protein_coding";
1	StringTie	transcript	180147405	180162756	.	+	.	transcript_id "MSTRG.2633.2"; gene_id "MSTRG.2633"; xloc "XLOC_001183"; class_code "u"; tss_id "TSS2032";	1	ensembl	exon	180092880	180093080	.	-	.	gene_id "ENSSSCG00000034516"; gene_version "3"; transcript_id "ENSSSCT00000078310"; transcript_version "2"; exon_number "6"; gene_name "CDKL1"; gene_source "ensembl"; gene_biotype "protein_coding"; transcript_name "CDKL1-201"; transcript_source "ensembl"; transcript_biotype "protein_coding"; exon_id "ENSSSCE00000043028"; exon_version "1";
1	StringTie	transcript	180147405	180162756	.	+	.	transcript_id "MSTRG.2633.2"; gene_id "MSTRG.2633"; xloc "XLOC_001183"; class_code "u"; tss_id "TSS2032";	1	ensembl	CDS	180092880	180093080	.	-	2	gene_id "ENSSSCG00000034516"; gene_version "3"; transcript_id "ENSSSCT00000078310"; transcript_version "2"; exon_number "6"; gene_name "CDKL1"; gene_source "ensembl"; gene_biotype "protein_coding"; transcript_name "CDKL1-201"; transcript_source "ensembl"; transcript_biotype "protein_coding"; protein_id "ENSSSCP00000069969"; protein_version "1";
1	StringTie	transcript	180147405	180162756	.	+	.	transcript_id "MSTRG.2633.2"; gene_id "MSTRG.2633"; xloc "XLOC_001183"; class_code "u"; tss_id "TSS2032";	1	ensembl	transcript	180084102	180145054	.	-	.	gene_id "ENSSSCG00000034516"; gene_version "3"; transcript_id "ENSSSCT00000075014"; transcript_version "2"; gene_name "CDKL1"; gene_source "ensembl"; gene_biotype "protein_coding"; transcript_name "CDKL1-202"; transcript_source "ensembl"; transcript_biotype "protein_coding";
1	StringTie	transcript	180147405	180162756	.	+	.	transcript_id "MSTRG.2633.2"; gene_id "MSTRG.2633"; xloc "XLOC_001183"; class_code "u"; tss_id "TSS2032";	1	ensembl	exon	180092880	180093080	.	-	.	gene_id "ENSSSCG00000034516"; gene_version "3"; transcript_id "ENSSSCT00000075014"; transcript_version "2"; exon_number "6"; gene_name "CDKL1"; gene_source "ensembl"; gene_biotype "protein_coding"; transcript_name "CDKL1-202"; transcript_source "ensembl"; transcript_biotype "protein_coding"; exon_id "ENSSSCE00000043028"; exon_version "1";
1	StringTie	transcript	180147405	180162756	.	+	.	transcript_id "MSTRG.2633.2"; gene_id "MSTRG.2633"; xloc "XLOC_001183"; class_code "u"; tss_id "TSS2032";	1	ensembl	CDS	180092880	180093080	.	-	2	gene_id "ENSSSCG00000034516"; gene_version "3"; transcript_id "ENSSSCT00000075014"; transcript_version "2"; exon_number "6"; gene_name "CDKL1"; gene_source "ensembl"; gene_biotype "protein_coding"; transcript_name "CDKL1-202"; transcript_source "ensembl"; transcript_biotype "protein_coding"; protein_id "ENSSSCP00000071907"; protein_version "2";
1	StringTie	transcript	180147405	180162756	.	+	.	transcript_id "MSTRG.2633.2"; gene_id "MSTRG.2633"; xloc "XLOC_001183"; class_code "u"; tss_id "TSS2032";	1	ensembl	transcript	180078659	180145032	.	-	.	gene_id "ENSSSCG00000034516"; gene_version "3"; transcript_id "ENSSSCT00000061065"; transcript_version "2"; gene_name "CDKL1"; gene_source "ensembl"; gene_biotype "protein_coding"; transcript_name "CDKL1-203"; transcript_source "ensembl"; transcript_biotype "protein_coding";
1	StringTie	transcript	180147405	180162756	.	+	.	transcript_id "MSTRG.2633.2"; gene_id "MSTRG.2633"; xloc "XLOC_001183"; class_code "u"; tss_id "TSS2032";	1	ensembl	exon	180092880	180093080	.	-	.	gene_id "ENSSSCG00000034516"; gene_version "3"; transcript_id "ENSSSCT00000061065"; transcript_version "2"; exon_number "6"; gene_name "CDKL1"; gene_source "ensembl"; gene_biotype "protein_coding"; transcript_name "CDKL1-203"; transcript_source "ensembl"; transcript_biotype "protein_coding"; exon_id "ENSSSCE00000043028"; exon_version "1";
1	StringTie	transcript	180147405	180162756	.	+	.	transcript_id "MSTRG.2633.2"; gene_id "MSTRG.2633"; xloc "XLOC_001183"; class_code "u"; tss_id "TSS2032";	1	ensembl	CDS	180092880	180093080	.	-	2	gene_id "ENSSSCG00000034516"; gene_version "3"; transcript_id "ENSSSCT00000061065"; transcript_version "2"; exon_number "6"; gene_name "CDKL1"; gene_source "ensembl"; gene_biotype "protein_coding"; transcript_name "CDKL1-203"; transcript_source "ensembl"; transcript_biotype "protein_coding"; protein_id "ENSSSCP00000036467"; protein_version "1";
1	StringTie	transcript	180147405	180162756	.	+	.	transcript_id "MSTRG.2633.2"; gene_id "MSTRG.2633"; xloc "XLOC_001183"; class_code "u"; tss_id "TSS2032";	1	ensembl	gene	180164458	180299496	.	-	.	gene_id "ENSSSCG00000036634"; gene_version "3"; gene_name "MAP4K5"; gene_source "ensembl"; gene_biotype "protein_coding";
1	StringTie	transcript	180147405	180162756	.	+	.	transcript_id "MSTRG.2633.2"; gene_id "MSTRG.2633"; xloc "XLOC_001183"; class_code "u"; tss_id "TSS2032";	1	ensembl	transcript	180164458	180299496	.	-	.	gene_id "ENSSSCG00000036634"; gene_version "3"; transcript_id "ENSSSCT00000087108"; transcript_version "2"; gene_name "MAP4K5"; gene_source "ensembl"; gene_biotype "protein_coding"; transcript_name "MAP4K5-201"; transcript_source "ensembl"; transcript_biotype "protein_coding";
1	StringTie	transcript	180147405	180162756	.	+	.	transcript_id "MSTRG.2633.2"; gene_id "MSTRG.2633"; xloc "XLOC_001183"; class_code "u"; tss_id "TSS2032";	1	ensembl	exon	180223968	180224084	.	-	.	gene_id "ENSSSCG00000036634"; gene_version "3"; transcript_id "ENSSSCT00000087108"; transcript_version "2"; exon_number "13"; gene_name "MAP4K5"; gene_source "ensembl"; gene_biotype "protein_coding"; transcript_name "MAP4K5-201"; transcript_source "ensembl"; transcript_biotype "protein_coding"; exon_id "ENSSSCE00000333668"; exon_version "1";
1	StringTie	transcript	180147405	180162756	.	+	.	transcript_id "MSTRG.2633.2"; gene_id "MSTRG.2633"; xloc "XLOC_001183"; class_code "u"; tss_id "TSS2032";	1	ensembl	CDS	180223968	180224084	.	-	0	gene_id "ENSSSCG00000036634"; gene_version "3"; transcript_id "ENSSSCT00000087108"; transcript_version "2"; exon_number "13"; gene_name "MAP4K5"; gene_source "ensembl"; gene_biotype "protein_coding"; transcript_name "MAP4K5-201"; transcript_source "ensembl"; transcript_biotype "protein_coding"; protein_id "ENSSSCP00000060345"; protein_version "2";
1	StringTie	transcript	180147405	180162756	.	+	.	transcript_id "MSTRG.2633.2"; gene_id "MSTRG.2633"; xloc "XLOC_001183"; class_code "u"; tss_id "TSS2032";	1	ensembl	transcript	180164458	180299496	.	-	.	gene_id "ENSSSCG00000036634"; gene_version "3"; transcript_id "ENSSSCT00000053912"; transcript_version "3"; gene_name "MAP4K5"; gene_source "ensembl"; gene_biotype "protein_coding"; transcript_name "MAP4K5-202"; transcript_source "ensembl"; transcript_biotype "protein_coding";
1	StringTie	transcript	180147405	180162756	.	+	.	transcript_id "MSTRG.2633.2"; gene_id "MSTRG.2633"; xloc "XLOC_001183"; class_code "u"; tss_id "TSS2032";	1	ensembl	exon	180223968	180224084	.	-	.	gene_id "ENSSSCG00000036634"; gene_version "3"; transcript_id "ENSSSCT00000053912"; transcript_version "3"; exon_number "13"; gene_name "MAP4K5"; gene_source "ensembl"; gene_biotype "protein_coding"; transcript_name "MAP4K5-202"; transcript_source "ensembl"; transcript_biotype "protein_coding"; exon_id "ENSSSCE00000333668"; exon_version "1";
1	StringTie	transcript	180147405	180162756	.	+	.	transcript_id "MSTRG.2633.2"; gene_id "MSTRG.2633"; xloc "XLOC_001183"; class_code "u"; tss_id "TSS2032";	1	ensembl	CDS	180223968	180224084	.	-	0	gene_id "ENSSSCG00000036634"; gene_version "3"; transcript_id "ENSSSCT00000053912"; transcript_version "3"; exon_number "13"; gene_name "MAP4K5"; gene_source "ensembl"; gene_biotype "protein_coding"; transcript_name "MAP4K5-202"; transcript_source "ensembl"; transcript_biotype "protein_coding"; protein_id "ENSSSCP00000057390"; protein_version "3";
1	StringTie	exon	180147405	180147982	.	+	.	transcript_id "MSTRG.2633.2"; gene_id "MSTRG.2633"; exon_number "1";	1	ensembl	exon	180056949	180057080	.	-	.	gene_id "ENSSSCG00000005016"; gene_version "5"; transcript_id "ENSSSCT00000058026"; transcript_version "3"; exon_number "4"; gene_name "L2HGDH"; gene_source "ensembl"; gene_biotype "protein_coding"; transcript_name "L2HGDH-201"; transcript_source "ensembl"; transcript_biotype "protein_coding"; exon_id "ENSSSCE00000043013"; exon_version "1";
1	StringTie	exon	180147405	180147982	.	+	.	transcript_id "MSTRG.2633.2"; gene_id "MSTRG.2633"; exon_number "1";	1	ensembl	CDS	180056949	180057080	.	-	0	gene_id "ENSSSCG00000005016"; gene_version "5"; transcript_id "ENSSSCT00000058026"; transcript_version "3"; exon_number "4"; gene_name "L2HGDH"; gene_source "ensembl"; gene_biotype "protein_coding"; transcript_name "L2HGDH-201"; transcript_source "ensembl"; transcript_biotype "protein_coding"; protein_id "ENSSSCP00000040701"; protein_version "2";
1	StringTie	exon	180147405	180147982	.	+	.	transcript_id "MSTRG.2633.2"; gene_id "MSTRG.2633"; exon_number "1";	1	ensembl	exon	180056949	180057080	.	-	.	gene_id "ENSSSCG00000005016"; gene_version "5"; transcript_id "ENSSSCT00000063003"; transcript_version "3"; exon_number "4"; gene_name "L2HGDH"; gene_source "ensembl"; gene_biotype "protein_coding"; transcript_name "L2HGDH-202"; transcript_source "ensembl"; transcript_biotype "protein_coding"; exon_id "ENSSSCE00000043013"; exon_version "1";
1	StringTie	exon	180147405	180147982	.	+	.	transcript_id "MSTRG.2633.2"; gene_id "MSTRG.2633"; exon_number "1";	1	ensembl	CDS	180056949	180057080	.	-	0	gene_id "ENSSSCG00000005016"; gene_version "5"; transcript_id "ENSSSCT00000063003"; transcript_version "3"; exon_number "4"; gene_name "L2HGDH"; gene_source "ensembl"; gene_biotype "protein_coding"; transcript_name "L2HGDH-202"; transcript_source "ensembl"; transcript_biotype "protein_coding"; protein_id "ENSSSCP00000034040"; protein_version "3";
1	StringTie	exon	180147405	180147982	.	+	.	transcript_id "MSTRG.2633.2"; gene_id "MSTRG.2633"; exon_number "1";	1	ensembl	exon	180056949	180057080	.	-	.	gene_id "ENSSSCG00000005016"; gene_version "5"; transcript_id "ENSSSCT00000005532"; transcript_version "4"; exon_number "4"; gene_name "L2HGDH"; gene_source "ensembl"; gene_biotype "protein_coding"; transcript_name "L2HGDH-203"; transcript_source "ensembl"; transcript_biotype "protein_coding"; exon_id "ENSSSCE00000043013"; exon_version "1";
1	StringTie	exon	180147405	180147982	.	+	.	transcript_id "MSTRG.2633.2"; gene_id "MSTRG.2633"; exon_number "1";	1	ensembl	CDS	180056949	180057080	.	-	0	gene_id "ENSSSCG00000005016"; gene_version "5"; transcript_id "ENSSSCT00000005532"; transcript_version "4"; exon_number "4"; gene_name "L2HGDH"; gene_source "ensembl"; gene_biotype "protein_coding"; transcript_name "L2HGDH-203"; transcript_source "ensembl"; transcript_biotype "protein_coding"; protein_id "ENSSSCP00000005394"; protein_version "3";
1	StringTie	exon	180147405	180147982	.	+	.	transcript_id "MSTRG.2633.2"; gene_id "MSTRG.2633"; exon_number "1";	1	ensembl	exon	180056949	180057080	.	-	.	gene_id "ENSSSCG00000005016"; gene_version "5"; transcript_id "ENSSSCT00000079344"; transcript_version "2"; exon_number "4"; gene_name "L2HGDH"; gene_source "ensembl"; gene_biotype "protein_coding"; transcript_name "L2HGDH-204"; transcript_source "ensembl"; transcript_biotype "protein_coding"; exon_id "ENSSSCE00000043013"; exon_version "1";
1	StringTie	exon	180147405	180147982	.	+	.	transcript_id "MSTRG.2633.2"; gene_id "MSTRG.2633"; exon_number "1";	1	ensembl	CDS	180056949	180057080	.	-	0	gene_id "ENSSSCG00000005016"; gene_version "5"; transcript_id "ENSSSCT00000079344"; transcript_version "2"; exon_number "4"; gene_name "L2HGDH"; gene_source "ensembl"; gene_biotype "protein_coding"; transcript_name "L2HGDH-204"; transcript_source "ensembl"; transcript_biotype "protein_coding"; protein_id "ENSSSCP00000066108"; protein_version "2";
1	StringTie	exon	180147405	180147982	.	+	.	transcript_id "MSTRG.2633.2"; gene_id "MSTRG.2633"; exon_number "1";	1	ensembl	exon	180068926	180069146	.	-	.	gene_id "ENSSSCG00000005016"; gene_version "5"; transcript_id "ENSSSCT00000058026"; transcript_version "3"; exon_number "1"; gene_name "L2HGDH"; gene_source "ensembl"; gene_biotype "protein_coding"; transcript_name "L2HGDH-201"; transcript_source "ensembl"; transcript_biotype "protein_coding"; exon_id "ENSSSCE00000328990"; exon_version "2";
1	StringTie	exon	180147405	180147982	.	+	.	transcript_id "MSTRG.2633.2"; gene_id "MSTRG.2633"; exon_number "1";	1	ensembl	CDS	180068926	180069065	.	-	0	gene_id "ENSSSCG00000005016"; gene_version "5"; transcript_id "ENSSSCT00000058026"; transcript_version "3"; exon_number "1"; gene_name "L2HGDH"; gene_source "ensembl"; gene_biotype "protein_coding"; transcript_name "L2HGDH-201"; transcript_source "ensembl"; transcript_biotype "protein_coding"; protein_id "ENSSSCP00000040701"; protein_version "2";
1	StringTie	exon	180147405	180147982	.	+	.	transcript_id "MSTRG.2633.2"; gene_id "MSTRG.2633"; exon_number "1";	1	ensembl	start_codon	180069063	180069065	.	-	0	gene_id "ENSSSCG00000005016"; gene_version "5"; transcript_id "ENSSSCT00000058026"; transcript_version "3"; exon_number "1"; gene_name "L2HGDH"; gene_source "ensembl"; gene_biotype "protein_coding"; transcript_name "L2HGDH-201"; transcript_source "ensembl"; transcript_biotype "protein_coding";
1	StringTie	exon	180147405	180147982	.	+	.	transcript_id "MSTRG.2633.2"; gene_id "MSTRG.2633"; exon_number "1";	1	ensembl	exon	180065356	180065471	.	-	.	gene_id "ENSSSCG00000005016"; gene_version "5"; transcript_id "ENSSSCT00000058026"; transcript_version "3"; exon_number "2"; gene_name "L2HGDH"; gene_source "ensembl"; gene_biotype "protein_coding"; transcript_name "L2HGDH-201"; transcript_source "ensembl"; transcript_biotype "protein_coding"; exon_id "ENSSSCE00000043011"; exon_version "1";
1	StringTie	exon	180147405	180147982	.	+	.	transcript_id "MSTRG.2633.2"; gene_id "MSTRG.2633"; exon_number "1";	1	ensembl	CDS	180065356	180065471	.	-	1	gene_id "ENSSSCG00000005016"; gene_version "5"; transcript_id "ENSSSCT00000058026"; transcript_version "3"; exon_number "2"; gene_name "L2HGDH"; gene_source "ensembl"; gene_biotype "protein_coding"; transcript_name "L2HGDH-201"; transcript_source "ensembl"; transcript_biotype "protein_coding"; protein_id "ENSSSCP00000040701"; protein_version "2";
1	StringTie	exon	180147405	180147982	.	+	.	transcript_id "MSTRG.2633.2"; gene_id "MSTRG.2633"; exon_number "1";	1	ensembl	exon	180064546	180064697	.	-	.	gene_id "ENSSSCG00000005016"; gene_version "5"; transcript_id "ENSSSCT00000058026"; transcript_version "3"; exon_number "3"; gene_name "L2HGDH"; gene_source "ensembl"; gene_biotype "protein_coding"; transcript_name "L2HGDH-201"; transcript_source "ensembl"; transcript_biotype "protein_coding"; exon_id "ENSSSCE00000043012"; exon_version "1";
1	StringTie	exon	180147405	180147982	.	+	.	transcript_id "MSTRG.2633.2"; gene_id "MSTRG.2633"; exon_number "1";	1	ensembl	CDS	180064546	180064697	.	-	2	gene_id "ENSSSCG00000005016"; gene_version "5"; transcript_id "ENSSSCT00000058026"; transcript_version "3"; exon_number "3"; gene_name "L2HGDH"; gene_source "ensembl"; gene_biotype "protein_coding"; transcript_name "L2HGDH-201"; transcript_source "ensembl"; transcript_biotype "protein_coding"; protein_id "ENSSSCP00000040701"; protein_version "2";
1	StringTie	exon	180147405	180147982	.	+	.	transcript_id "MSTRG.2633.2"; gene_id "MSTRG.2633"; exon_number "1";	1	ensembl	five_prime_utr	180069066	180069146	.	-	.	gene_id "ENSSSCG00000005016"; gene_version "5"; transcript_id "ENSSSCT00000058026"; transcript_version "3"; gene_name "L2HGDH"; gene_source "ensembl"; gene_biotype "protein_coding"; transcript_name "L2HGDH-201"; transcript_source "ensembl"; transcript_biotype "protein_coding";
1	StringTie	exon	180147405	180147982	.	+	.	transcript_id "MSTRG.2633.2"; gene_id "MSTRG.2633"; exon_number "1";	1	ensembl	exon	180068926	180069146	.	-	.	gene_id "ENSSSCG00000005016"; gene_version "5"; transcript_id "ENSSSCT00000063003"; transcript_version "3"; exon_number "1"; gene_name "L2HGDH"; gene_source "ensembl"; gene_biotype "protein_coding"; transcript_name "L2HGDH-202"; transcript_source "ensembl"; transcript_biotype "protein_coding"; exon_id "ENSSSCE00000328990"; exon_version "2";
1	StringTie	exon	180147405	180147982	.	+	.	transcript_id "MSTRG.2633.2"; gene_id "MSTRG.2633"; exon_number "1";	1	ensembl	CDS	180068926	180069065	.	-	0	gene_id "ENSSSCG00000005016"; gene_version "5"; transcript_id "ENSSSCT00000063003"; transcript_version "3"; exon_number "1"; gene_name "L2HGDH"; gene_source "ensembl"; gene_biotype "protein_coding"; transcript_name "L2HGDH-202"; transcript_source "ensembl"; transcript_biotype "protein_coding"; protein_id "ENSSSCP00000034040"; protein_version "3";
1	StringTie	exon	180147405	180147982	.	+	.	transcript_id "MSTRG.2633.2"; gene_id "MSTRG.2633"; exon_number "1";	1	ensembl	start_codon	180069063	180069065	.	-	0	gene_id "ENSSSCG00000005016"; gene_version "5"; transcript_id "ENSSSCT00000063003"; transcript_version "3"; exon_number "1"; gene_name "L2HGDH"; gene_source "ensembl"; gene_biotype "protein_coding"; transcript_name "L2HGDH-202"; transcript_source "ensembl"; transcript_biotype "protein_coding";
1	StringTie	exon	180147405	180147982	.	+	.	transcript_id "MSTRG.2633.2"; gene_id "MSTRG.2633"; exon_number "1";	1	ensembl	exon	180065356	180065471	.	-	.	gene_id "ENSSSCG00000005016"; gene_version "5"; transcript_id "ENSSSCT00000063003"; transcript_version "3"; exon_number "2"; gene_name "L2HGDH"; gene_source "ensembl"; gene_biotype "protein_coding"; transcript_name "L2HGDH-202"; transcript_source "ensembl"; transcript_biotype "protein_coding"; exon_id "ENSSSCE00000043011"; exon_version "1";
1	StringTie	exon	180147405	180147982	.	+	.	transcript_id "MSTRG.2633.2"; gene_id "MSTRG.2633"; exon_number "1";	1	ensembl	CDS	180065356	180065471	.	-	1	gene_id "ENSSSCG00000005016"; gene_version "5"; transcript_id "ENSSSCT00000063003"; transcript_version "3"; exon_number "2"; gene_name "L2HGDH"; gene_source "ensembl"; gene_biotype "protein_coding"; transcript_name "L2HGDH-202"; transcript_source "ensembl"; transcript_biotype "protein_coding"; protein_id "ENSSSCP00000034040"; protein_version "3";
1	StringTie	exon	180147405	180147982	.	+	.	transcript_id "MSTRG.2633.2"; gene_id "MSTRG.2633"; exon_number "1";	1	ensembl	exon	180064546	180064697	.	-	.	gene_id "ENSSSCG00000005016"; gene_version "5"; transcript_id "ENSSSCT00000063003"; transcript_version "3"; exon_number "3"; gene_name "L2HGDH"; gene_source "ensembl"; gene_biotype "protein_coding"; transcript_name "L2HGDH-202"; transcript_source "ensembl"; transcript_biotype "protein_coding"; exon_id "ENSSSCE00000043012"; exon_version "1";
1	StringTie	exon	180147405	180147982	.	+	.	transcript_id "MSTRG.2633.2"; gene_id "MSTRG.2633"; exon_number "1";	1	ensembl	CDS	180064546	180064697	.	-	2	gene_id "ENSSSCG00000005016"; gene_version "5"; transcript_id "ENSSSCT00000063003"; transcript_version "3"; exon_number "3"; gene_name "L2HGDH"; gene_source "ensembl"; gene_biotype "protein_coding"; transcript_name "L2HGDH-202"; transcript_source "ensembl"; transcript_biotype "protein_coding"; protein_id "ENSSSCP00000034040"; protein_version "3";
1	StringTie	exon	180147405	180147982	.	+	.	transcript_id "MSTRG.2633.2"; gene_id "MSTRG.2633"; exon_number "1";	1	ensembl	five_prime_utr	180069066	180069146	.	-	.	gene_id "ENSSSCG00000005016"; gene_version "5"; transcript_id "ENSSSCT00000063003"; transcript_version "3"; gene_name "L2HGDH"; gene_source "ensembl"; gene_biotype "protein_coding"; transcript_name "L2HGDH-202"; transcript_source "ensembl"; transcript_biotype "protein_coding";
1	StringTie	exon	180147405	180147982	.	+	.	transcript_id "MSTRG.2633.2"; gene_id "MSTRG.2633"; exon_number "1";	1	ensembl	exon	180068926	180069146	.	-	.	gene_id "ENSSSCG00000005016"; gene_version "5"; transcript_id "ENSSSCT00000005532"; transcript_version "4"; exon_number "1"; gene_name "L2HGDH"; gene_source "ensembl"; gene_biotype "protein_coding"; transcript_name "L2HGDH-203"; transcript_source "ensembl"; transcript_biotype "protein_coding"; exon_id "ENSSSCE00000328990"; exon_version "2";
1	StringTie	exon	180147405	180147982	.	+	.	transcript_id "MSTRG.2633.2"; gene_id "MSTRG.2633"; exon_number "1";	1	ensembl	CDS	180068926	180069065	.	-	0	gene_id "ENSSSCG00000005016"; gene_version "5"; transcript_id "ENSSSCT00000005532"; transcript_version "4"; exon_number "1"; gene_name "L2HGDH"; gene_source "ensembl"; gene_biotype "protein_coding"; transcript_name "L2HGDH-203"; transcript_source "ensembl"; transcript_biotype "protein_coding"; protein_id "ENSSSCP00000005394"; protein_version "3";
1	StringTie	exon	180147405	180147982	.	+	.	transcript_id "MSTRG.2633.2"; gene_id "MSTRG.2633"; exon_number "1";	1	ensembl	start_codon	180069063	180069065	.	-	0	gene_id "ENSSSCG00000005016"; gene_version "5"; transcript_id "ENSSSCT00000005532"; transcript_version "4"; exon_number "1"; gene_name "L2HGDH"; gene_source "ensembl"; gene_biotype "protein_coding"; transcript_name "L2HGDH-203"; transcript_source "ensembl"; transcript_biotype "protein_coding";
1	StringTie	exon	180147405	180147982	.	+	.	transcript_id "MSTRG.2633.2"; gene_id "MSTRG.2633"; exon_number "1";	1	ensembl	exon	180065356	180065471	.	-	.	gene_id "ENSSSCG00000005016"; gene_version "5"; transcript_id "ENSSSCT00000005532"; transcript_version "4"; exon_number "2"; gene_name "L2HGDH"; gene_source "ensembl"; gene_biotype "protein_coding"; transcript_name "L2HGDH-203"; transcript_source "ensembl"; transcript_biotype "protein_coding"; exon_id "ENSSSCE00000043011"; exon_version "1";
1	StringTie	exon	180147405	180147982	.	+	.	transcript_id "MSTRG.2633.2"; gene_id "MSTRG.2633"; exon_number "1";	1	ensembl	CDS	180065356	180065471	.	-	1	gene_id "ENSSSCG00000005016"; gene_version "5"; transcript_id "ENSSSCT00000005532"; transcript_version "4"; exon_number "2"; gene_name "L2HGDH"; gene_source "ensembl"; gene_biotype "protein_coding"; transcript_name "L2HGDH-203"; transcript_source "ensembl"; transcript_biotype "protein_coding"; protein_id "ENSSSCP00000005394"; protein_version "3";
1	StringTie	exon	180147405	180147982	.	+	.	transcript_id "MSTRG.2633.2"; gene_id "MSTRG.2633"; exon_number "1";	1	ensembl	exon	180064546	180064697	.	-	.	gene_id "ENSSSCG00000005016"; gene_version "5"; transcript_id "ENSSSCT00000005532"; transcript_version "4"; exon_number "3"; gene_name "L2HGDH"; gene_source "ensembl"; gene_biotype "protein_coding"; transcript_name "L2HGDH-203"; transcript_source "ensembl"; transcript_biotype "protein_coding"; exon_id "ENSSSCE00000043012"; exon_version "1";
1	StringTie	exon	180147405	180147982	.	+	.	transcript_id "MSTRG.2633.2"; gene_id "MSTRG.2633"; exon_number "1";	1	ensembl	CDS	180064546	180064697	.	-	2	gene_id "ENSSSCG00000005016"; gene_version "5"; transcript_id "ENSSSCT00000005532"; transcript_version "4"; exon_number "3"; gene_name "L2HGDH"; gene_source "ensembl"; gene_biotype "protein_coding"; transcript_name "L2HGDH-203"; transcript_source "ensembl"; transcript_biotype "protein_coding"; protein_id "ENSSSCP00000005394"; protein_version "3";
1	StringTie	exon	180147405	180147982	.	+	.	transcript_id "MSTRG.2633.2"; gene_id "MSTRG.2633"; exon_number "1";	1	ensembl	five_prime_utr	180069066	180069146	.	-	.	gene_id "ENSSSCG00000005016"; gene_version "5"; transcript_id "ENSSSCT00000005532"; transcript_version "4"; gene_name "L2HGDH"; gene_source "ensembl"; gene_biotype "protein_coding"; transcript_name "L2HGDH-203"; transcript_source "ensembl"; transcript_biotype "protein_coding";
1	StringTie	exon	180147405	180147982	.	+	.	transcript_id "MSTRG.2633.2"; gene_id "MSTRG.2633"; exon_number "1";	1	ensembl	exon	180068926	180069099	.	-	.	gene_id "ENSSSCG00000005016"; gene_version "5"; transcript_id "ENSSSCT00000079344"; transcript_version "2"; exon_number "1"; gene_name "L2HGDH"; gene_source "ensembl"; gene_biotype "protein_coding"; transcript_name "L2HGDH-204"; transcript_source "ensembl"; transcript_biotype "protein_coding"; exon_id "ENSSSCE00000043010"; exon_version "4";
1	StringTie	exon	180147405	180147982	.	+	.	transcript_id "MSTRG.2633.2"; gene_id "MSTRG.2633"; exon_number "1";	1	ensembl	CDS	180068926	180069065	.	-	0	gene_id "ENSSSCG00000005016"; gene_version "5"; transcript_id "ENSSSCT00000079344"; transcript_version "2"; exon_number "1"; gene_name "L2HGDH"; gene_source "ensembl"; gene_biotype "protein_coding"; transcript_name "L2HGDH-204"; transcript_source "ensembl"; transcript_biotype "protein_coding"; protein_id "ENSSSCP00000066108"; protein_version "2";
1	StringTie	exon	180147405	180147982	.	+	.	transcript_id "MSTRG.2633.2"; gene_id "MSTRG.2633"; exon_number "1";	1	ensembl	start_codon	180069063	180069065	.	-	0	gene_id "ENSSSCG00000005016"; gene_version "5"; transcript_id "ENSSSCT00000079344"; transcript_version "2"; exon_number "1"; gene_name "L2HGDH"; gene_source "ensembl"; gene_biotype "protein_coding"; transcript_name "L2HGDH-204"; transcript_source "ensembl"; transcript_biotype "protein_coding";
1	StringTie	exon	180147405	180147982	.	+	.	transcript_id "MSTRG.2633.2"; gene_id "MSTRG.2633"; exon_number "1";	1	ensembl	exon	180065356	180065471	.	-	.	gene_id "ENSSSCG00000005016"; gene_version "5"; transcript_id "ENSSSCT00000079344"; transcript_version "2"; exon_number "2"; gene_name "L2HGDH"; gene_source "ensembl"; gene_biotype "protein_coding"; transcript_name "L2HGDH-204"; transcript_source "ensembl"; transcript_biotype "protein_coding"; exon_id "ENSSSCE00000043011"; exon_version "1";
1	StringTie	exon	180147405	180147982	.	+	.	transcript_id "MSTRG.2633.2"; gene_id "MSTRG.2633"; exon_number "1";	1	ensembl	CDS	180065356	180065471	.	-	1	gene_id "ENSSSCG00000005016"; gene_version "5"; transcript_id "ENSSSCT00000079344"; transcript_version "2"; exon_number "2"; gene_name "L2HGDH"; gene_source "ensembl"; gene_biotype "protein_coding"; transcript_name "L2HGDH-204"; transcript_source "ensembl"; transcript_biotype "protein_coding"; protein_id "ENSSSCP00000066108"; protein_version "2";
1	StringTie	exon	180147405	180147982	.	+	.	transcript_id "MSTRG.2633.2"; gene_id "MSTRG.2633"; exon_number "1";	1	ensembl	exon	180064546	180064697	.	-	.	gene_id "ENSSSCG00000005016"; gene_version "5"; transcript_id "ENSSSCT00000079344"; transcript_version "2"; exon_number "3"; gene_name "L2HGDH"; gene_source "ensembl"; gene_biotype "protein_coding"; transcript_name "L2HGDH-204"; transcript_source "ensembl"; transcript_biotype "protein_coding"; exon_id "ENSSSCE00000043012"; exon_version "1";
1	StringTie	exon	180147405	180147982	.	+	.	transcript_id "MSTRG.2633.2"; gene_id "MSTRG.2633"; exon_number "1";	1	ensembl	CDS	180064546	180064697	.	-	2	gene_id "ENSSSCG00000005016"; gene_version "5"; transcript_id "ENSSSCT00000079344"; transcript_version "2"; exon_number "3"; gene_name "L2HGDH"; gene_source "ensembl"; gene_biotype "protein_coding"; transcript_name "L2HGDH-204"; transcript_source "ensembl"; transcript_biotype "protein_coding"; protein_id "ENSSSCP00000066108"; protein_version "2";
1	StringTie	exon	180147405	180147982	.	+	.	transcript_id "MSTRG.2633.2"; gene_id "MSTRG.2633"; exon_number "1";	1	ensembl	five_prime_utr	180069066	180069099	.	-	.	gene_id "ENSSSCG00000005016"; gene_version "5"; transcript_id "ENSSSCT00000079344"; transcript_version "2"; gene_name "L2HGDH"; gene_source "ensembl"; gene_biotype "protein_coding"; transcript_name "L2HGDH-204"; transcript_source "ensembl"; transcript_biotype "protein_coding";
1	StringTie	exon	180147405	180147982	.	+	.	transcript_id "MSTRG.2633.2"; gene_id "MSTRG.2633"; exon_number "1";	1	ensembl	exon	180069248	180069307	.	+	.	gene_id "ENSSSCG00000031354"; gene_version "3"; transcript_id "ENSSSCT00000094980"; transcript_version "1"; exon_number "1"; gene_name "DMAC2L"; gene_source "ensembl"; gene_biotype "protein_coding"; transcript_name "DMAC2L-201"; transcript_source "ensembl"; transcript_biotype "protein_coding"; exon_id "ENSSSCE00000522885"; exon_version "1";
1	StringTie	exon	180147405	180147982	.	+	.	transcript_id "MSTRG.2633.2"; gene_id "MSTRG.2633"; exon_number "1";	1	ensembl	exon	180074977	180075241	.	+	.	gene_id "ENSSSCG00000031354"; gene_version "3"; transcript_id "ENSSSCT00000094980"; transcript_version "1"; exon_number "2"; gene_name "DMAC2L"; gene_source "ensembl"; gene_biotype "protein_coding"; transcript_name "DMAC2L-201"; transcript_source "ensembl"; transcript_biotype "protein_coding"; exon_id "ENSSSCE00000515491"; exon_version "1";
1	StringTie	exon	180147405	180147982	.	+	.	transcript_id "MSTRG.2633.2"; gene_id "MSTRG.2633"; exon_number "1";	1	ensembl	exon	180075360	180075471	.	+	.	gene_id "ENSSSCG00000031354"; gene_version "3"; transcript_id "ENSSSCT00000094980"; transcript_version "1"; exon_number "3"; gene_name "DMAC2L"; gene_source "ensembl"; gene_biotype "protein_coding"; transcript_name "DMAC2L-201"; transcript_source "ensembl"; transcript_biotype "protein_coding"; exon_id "ENSSSCE00000336988"; exon_version "1";
1	StringTie	exon	180147405	180147982	.	+	.	transcript_id "MSTRG.2633.2"; gene_id "MSTRG.2633"; exon_number "1";	1	ensembl	CDS	180075365	180075471	.	+	0	gene_id "ENSSSCG00000031354"; gene_version "3"; transcript_id "ENSSSCT00000094980"; transcript_version "1"; exon_number "3"; gene_name "DMAC2L"; gene_source "ensembl"; gene_biotype "protein_coding"; transcript_name "DMAC2L-201"; transcript_source "ensembl"; transcript_biotype "protein_coding"; protein_id "ENSSSCP00000080422"; protein_version "1";
1	StringTie	exon	180147405	180147982	.	+	.	transcript_id "MSTRG.2633.2"; gene_id "MSTRG.2633"; exon_number "1";	1	ensembl	start_codon	180075365	180075367	.	+	0	gene_id "ENSSSCG00000031354"; gene_version "3"; transcript_id "ENSSSCT00000094980"; transcript_version "1"; exon_number "3"; gene_name "DMAC2L"; gene_source "ensembl"; gene_biotype "protein_coding"; transcript_name "DMAC2L-201"; transcript_source "ensembl"; transcript_biotype "protein_coding";
1	StringTie	exon	180147405	180147982	.	+	.	transcript_id "MSTRG.2633.2"; gene_id "MSTRG.2633"; exon_number "1";	1	ensembl	five_prime_utr	180069248	180069307	.	+	.	gene_id "ENSSSCG00000031354"; gene_version "3"; transcript_id "ENSSSCT00000094980"; transcript_version "1"; gene_name "DMAC2L"; gene_source "ensembl"; gene_biotype "protein_coding"; transcript_name "DMAC2L-201"; transcript_source "ensembl"; transcript_biotype "protein_coding";
1	StringTie	exon	180147405	180147982	.	+	.	transcript_id "MSTRG.2633.2"; gene_id "MSTRG.2633"; exon_number "1";	1	ensembl	five_prime_utr	180074977	180075241	.	+	.	gene_id "ENSSSCG00000031354"; gene_version "3"; transcript_id "ENSSSCT00000094980"; transcript_version "1"; gene_name "DMAC2L"; gene_source "ensembl"; gene_biotype "protein_coding"; transcript_name "DMAC2L-201"; transcript_source "ensembl"; transcript_biotype "protein_coding";
1	StringTie	exon	180147405	180147982	.	+	.	transcript_id "MSTRG.2633.2"; gene_id "MSTRG.2633"; exon_number "1";	1	ensembl	five_prime_utr	180075360	180075364	.	+	.	gene_id "ENSSSCG00000031354"; gene_version "3"; transcript_id "ENSSSCT00000094980"; transcript_version "1"; gene_name "DMAC2L"; gene_source "ensembl"; gene_biotype "protein_coding"; transcript_name "DMAC2L-201"; transcript_source "ensembl"; transcript_biotype "protein_coding";
1	StringTie	exon	180147405	180147982	.	+	.	transcript_id "MSTRG.2633.2"; gene_id "MSTRG.2633"; exon_number "1";	1	ensembl	exon	180069248	180069307	.	+	.	gene_id "ENSSSCG00000031354"; gene_version "3"; transcript_id "ENSSSCT00000094790"; transcript_version "1"; exon_number "1"; gene_name "DMAC2L"; gene_source "ensembl"; gene_biotype "protein_coding"; transcript_name "DMAC2L-202"; transcript_source "ensembl"; transcript_biotype "protein_coding"; exon_id "ENSSSCE00000522885"; exon_version "1";
1	StringTie	exon	180147405	180147982	.	+	.	transcript_id "MSTRG.2633.2"; gene_id "MSTRG.2633"; exon_number "1";	1	ensembl	exon	180074977	180075241	.	+	.	gene_id "ENSSSCG00000031354"; gene_version "3"; transcript_id "ENSSSCT00000094790"; transcript_version "1"; exon_number "2"; gene_name "DMAC2L"; gene_source "ensembl"; gene_biotype "protein_coding"; transcript_name "DMAC2L-202"; transcript_source "ensembl"; transcript_biotype "protein_coding"; exon_id "ENSSSCE00000515491"; exon_version "1";
1	StringTie	exon	180147405	180147982	.	+	.	transcript_id "MSTRG.2633.2"; gene_id "MSTRG.2633"; exon_number "1";	1	ensembl	exon	180075360	180075471	.	+	.	gene_id "ENSSSCG00000031354"; gene_version "3"; transcript_id "ENSSSCT00000094790"; transcript_version "1"; exon_number "3"; gene_name "DMAC2L"; gene_source "ensembl"; gene_biotype "protein_coding"; transcript_name "DMAC2L-202"; transcript_source "ensembl"; transcript_biotype "protein_coding"; exon_id "ENSSSCE00000336988"; exon_version "1";
1	StringTie	exon	180147405	180147982	.	+	.	transcript_id "MSTRG.2633.2"; gene_id "MSTRG.2633"; exon_number "1";	1	ensembl	CDS	180075365	180075471	.	+	0	gene_id "ENSSSCG00000031354"; gene_version "3"; transcript_id "ENSSSCT00000094790"; transcript_version "1"; exon_number "3"; gene_name "DMAC2L"; gene_source "ensembl"; gene_biotype "protein_coding"; transcript_name "DMAC2L-202"; transcript_source "ensembl"; transcript_biotype "protein_coding"; protein_id "ENSSSCP00000075286"; protein_version "1";
1	StringTie	exon	180147405	180147982	.	+	.	transcript_id "MSTRG.2633.2"; gene_id "MSTRG.2633"; exon_number "1";	1	ensembl	start_codon	180075365	180075367	.	+	0	gene_id "ENSSSCG00000031354"; gene_version "3"; transcript_id "ENSSSCT00000094790"; transcript_version "1"; exon_number "3"; gene_name "DMAC2L"; gene_source "ensembl"; gene_biotype "protein_coding"; transcript_name "DMAC2L-202"; transcript_source "ensembl"; transcript_biotype "protein_coding";
1	StringTie	exon	180147405	180147982	.	+	.	transcript_id "MSTRG.2633.2"; gene_id "MSTRG.2633"; exon_number "1";	1	ensembl	five_prime_utr	180069248	180069307	.	+	.	gene_id "ENSSSCG00000031354"; gene_version "3"; transcript_id "ENSSSCT00000094790"; transcript_version "1"; gene_name "DMAC2L"; gene_source "ensembl"; gene_biotype "protein_coding"; transcript_name "DMAC2L-202"; transcript_source "ensembl"; transcript_biotype "protein_coding";
1	StringTie	exon	180147405	180147982	.	+	.	transcript_id "MSTRG.2633.2"; gene_id "MSTRG.2633"; exon_number "1";	1	ensembl	five_prime_utr	180074977	180075241	.	+	.	gene_id "ENSSSCG00000031354"; gene_version "3"; transcript_id "ENSSSCT00000094790"; transcript_version "1"; gene_name "DMAC2L"; gene_source "ensembl"; gene_biotype "protein_coding"; transcript_name "DMAC2L-202"; transcript_source "ensembl"; transcript_biotype "protein_coding";
1	StringTie	exon	180147405	180147982	.	+	.	transcript_id "MSTRG.2633.2"; gene_id "MSTRG.2633"; exon_number "1";	1	ensembl	five_prime_utr	180075360	180075364	.	+	.	gene_id "ENSSSCG00000031354"; gene_version "3"; transcript_id "ENSSSCT00000094790"; transcript_version "1"; gene_name "DMAC2L"; gene_source "ensembl"; gene_biotype "protein_coding"; transcript_name "DMAC2L-202"; transcript_source "ensembl"; transcript_biotype "protein_coding";
1	StringTie	exon	180147405	180147982	.	+	.	transcript_id "MSTRG.2633.2"; gene_id "MSTRG.2633"; exon_number "1";	1	ensembl	exon	180069245	180069307	.	+	.	gene_id "ENSSSCG00000031354"; gene_version "3"; transcript_id "ENSSSCT00000041018"; transcript_version "3"; exon_number "1"; gene_name "DMAC2L"; gene_source "ensembl"; gene_biotype "protein_coding"; transcript_name "DMAC2L-203"; transcript_source "ensembl"; transcript_biotype "protein_coding"; exon_id "ENSSSCE00000043020"; exon_version "5";
1	StringTie	exon	180147405	180147982	.	+	.	transcript_id "MSTRG.2633.2"; gene_id "MSTRG.2633"; exon_number "1";	1	ensembl	exon	180075048	180075241	.	+	.	gene_id "ENSSSCG00000031354"; gene_version "3"; transcript_id "ENSSSCT00000041018"; transcript_version "3"; exon_number "2"; gene_name "DMAC2L"; gene_source "ensembl"; gene_biotype "protein_coding"; transcript_name "DMAC2L-203"; transcript_source "ensembl"; transcript_biotype "protein_coding"; exon_id "ENSSSCE00000043021"; exon_version "1";
1	StringTie	exon	180147405	180147982	.	+	.	transcript_id "MSTRG.2633.2"; gene_id "MSTRG.2633"; exon_number "1";	1	ensembl	exon	180075360	180075471	.	+	.	gene_id "ENSSSCG00000031354"; gene_version "3"; transcript_id "ENSSSCT00000041018"; transcript_version "3"; exon_number "3"; gene_name "DMAC2L"; gene_source "ensembl"; gene_biotype "protein_coding"; transcript_name "DMAC2L-203"; transcript_source "ensembl"; transcript_biotype "protein_coding"; exon_id "ENSSSCE00000336988"; exon_version "1";
1	StringTie	exon	180147405	180147982	.	+	.	transcript_id "MSTRG.2633.2"; gene_id "MSTRG.2633"; exon_number "1";	1	ensembl	CDS	180075365	180075471	.	+	0	gene_id "ENSSSCG00000031354"; gene_version "3"; transcript_id "ENSSSCT00000041018"; transcript_version "3"; exon_number "3"; gene_name "DMAC2L"; gene_source "ensembl"; gene_biotype "protein_coding"; transcript_name "DMAC2L-203"; transcript_source "ensembl"; transcript_biotype "protein_coding"; protein_id "ENSSSCP00000035990"; protein_version "1";
1	StringTie	exon	180147405	180147982	.	+	.	transcript_id "MSTRG.2633.2"; gene_id "MSTRG.2633"; exon_number "1";	1	ensembl	start_codon	180075365	180075367	.	+	0	gene_id "ENSSSCG00000031354"; gene_version "3"; transcript_id "ENSSSCT00000041018"; transcript_version "3"; exon_number "3"; gene_name "DMAC2L"; gene_source "ensembl"; gene_biotype "protein_coding"; transcript_name "DMAC2L-203"; transcript_source "ensembl"; transcript_biotype "protein_coding";
1	StringTie	exon	180147405	180147982	.	+	.	transcript_id "MSTRG.2633.2"; gene_id "MSTRG.2633"; exon_number "1";	1	ensembl	five_prime_utr	180069245	180069307	.	+	.	gene_id "ENSSSCG00000031354"; gene_version "3"; transcript_id "ENSSSCT00000041018"; transcript_version "3"; gene_name "DMAC2L"; gene_source "ensembl"; gene_biotype "protein_coding"; transcript_name "DMAC2L-203"; transcript_source "ensembl"; transcript_biotype "protein_coding";
1	StringTie	exon	180147405	180147982	.	+	.	transcript_id "MSTRG.2633.2"; gene_id "MSTRG.2633"; exon_number "1";	1	ensembl	five_prime_utr	180075048	180075241	.	+	.	gene_id "ENSSSCG00000031354"; gene_version "3"; transcript_id "ENSSSCT00000041018"; transcript_version "3"; gene_name "DMAC2L"; gene_source "ensembl"; gene_biotype "protein_coding"; transcript_name "DMAC2L-203"; transcript_source "ensembl"; transcript_biotype "protein_coding";
1	StringTie	exon	180147405	180147982	.	+	.	transcript_id "MSTRG.2633.2"; gene_id "MSTRG.2633"; exon_number "1";	1	ensembl	five_prime_utr	180075360	180075364	.	+	.	gene_id "ENSSSCG00000031354"; gene_version "3"; transcript_id "ENSSSCT00000041018"; transcript_version "3"; gene_name "DMAC2L"; gene_source "ensembl"; gene_biotype "protein_coding"; transcript_name "DMAC2L-203"; transcript_source "ensembl"; transcript_biotype "protein_coding";
1	StringTie	exon	180147405	180147982	.	+	.	transcript_id "MSTRG.2633.2"; gene_id "MSTRG.2633"; exon_number "1";	1	ensembl	exon	180068973	180069307	.	+	.	gene_id "ENSSSCG00000031354"; gene_version "3"; transcript_id "ENSSSCT00000039137"; transcript_version "2"; exon_number "1"; gene_name "DMAC2L"; gene_source "ensembl"; gene_biotype "protein_coding"; transcript_name "DMAC2L-204"; transcript_source "ensembl"; transcript_biotype "protein_coding"; exon_id "ENSSSCE00000269865"; exon_version "2";
1	StringTie	exon	180147405	180147982	.	+	.	transcript_id "MSTRG.2633.2"; gene_id "MSTRG.2633"; exon_number "1";	1	ensembl	CDS	180069172	180069307	.	+	0	gene_id "ENSSSCG00000031354"; gene_version "3"; transcript_id "ENSSSCT00000039137"; transcript_version "2"; exon_number "1"; gene_name "DMAC2L"; gene_source "ensembl"; gene_biotype "protein_coding"; transcript_name "DMAC2L-204"; transcript_source "ensembl"; transcript_biotype "protein_coding"; protein_id "ENSSSCP00000034229"; protein_version "1";
1	StringTie	exon	180147405	180147982	.	+	.	transcript_id "MSTRG.2633.2"; gene_id "MSTRG.2633"; exon_number "1";	1	ensembl	start_codon	180069172	180069174	.	+	0	gene_id "ENSSSCG00000031354"; gene_version "3"; transcript_id "ENSSSCT00000039137"; transcript_version "2"; exon_number "1"; gene_name "DMAC2L"; gene_source "ensembl"; gene_biotype "protein_coding"; transcript_name "DMAC2L-204"; transcript_source "ensembl"; transcript_biotype "protein_coding";
1	StringTie	exon	180147405	180147982	.	+	.	transcript_id "MSTRG.2633.2"; gene_id "MSTRG.2633"; exon_number "1";	1	ensembl	exon	180075360	180075471	.	+	.	gene_id "ENSSSCG00000031354"; gene_version "3"; transcript_id "ENSSSCT00000039137"; transcript_version "2"; exon_number "2"; gene_name "DMAC2L"; gene_source "ensembl"; gene_biotype "protein_coding"; transcript_name "DMAC2L-204"; transcript_source "ensembl"; transcript_biotype "protein_coding"; exon_id "ENSSSCE00000291804"; exon_version "1";
1	StringTie	exon	180147405	180147982	.	+	.	transcript_id "MSTRG.2633.2"; gene_id "MSTRG.2633"; exon_number "1";	1	ensembl	CDS	180075360	180075471	.	+	2	gene_id "ENSSSCG00000031354"; gene_version "3"; transcript_id "ENSSSCT00000039137"; transcript_version "2"; exon_number "2"; gene_name "DMAC2L"; gene_source "ensembl"; gene_biotype "protein_coding"; transcript_name "DMAC2L-204"; transcript_source "ensembl"; transcript_biotype "protein_coding"; protein_id "ENSSSCP00000034229"; protein_version "1";
1	StringTie	exon	180147405	180147982	.	+	.	transcript_id "MSTRG.2633.2"; gene_id "MSTRG.2633"; exon_number "1";	1	ensembl	five_prime_utr	180068973	180069171	.	+	.	gene_id "ENSSSCG00000031354"; gene_version "3"; transcript_id "ENSSSCT00000039137"; transcript_version "2"; gene_name "DMAC2L"; gene_source "ensembl"; gene_biotype "protein_coding"; transcript_name "DMAC2L-204"; transcript_source "ensembl"; transcript_biotype "protein_coding";
1	StringTie	exon	180147405	180147982	.	+	.	transcript_id "MSTRG.2633.2"; gene_id "MSTRG.2633"; exon_number "1";	1	ensembl	exon	180076632	180076854	.	+	.	gene_id "ENSSSCG00000031354"; gene_version "3"; transcript_id "ENSSSCT00000094980"; transcript_version "1"; exon_number "4"; gene_name "DMAC2L"; gene_source "ensembl"; gene_biotype "protein_coding"; transcript_name "DMAC2L-201"; transcript_source "ensembl"; transcript_biotype "protein_coding"; exon_id "ENSSSCE00000511578"; exon_version "1";
1	StringTie	exon	180147405	180147982	.	+	.	transcript_id "MSTRG.2633.2"; gene_id "MSTRG.2633"; exon_number "1";	1	ensembl	CDS	180076632	180076854	.	+	1	gene_id "ENSSSCG00000031354"; gene_version "3"; transcript_id "ENSSSCT00000094980"; transcript_version "1"; exon_number "4"; gene_name "DMAC2L"; gene_source "ensembl"; gene_biotype "protein_coding"; transcript_name "DMAC2L-201"; transcript_source "ensembl"; transcript_biotype "protein_coding"; protein_id "ENSSSCP00000080422"; protein_version "1";
1	StringTie	exon	180147405	180147982	.	+	.	transcript_id "MSTRG.2633.2"; gene_id "MSTRG.2633"; exon_number "1";	1	ensembl	exon	180076857	180076859	.	+	.	gene_id "ENSSSCG00000031354"; gene_version "3"; transcript_id "ENSSSCT00000094980"; transcript_version "1"; exon_number "5"; gene_name "DMAC2L"; gene_source "ensembl"; gene_biotype "protein_coding"; transcript_name "DMAC2L-201"; transcript_source "ensembl"; transcript_biotype "protein_coding"; exon_id "ENSSSCE00000526550"; exon_version "1";
1	StringTie	exon	180147405	180147982	.	+	.	transcript_id "MSTRG.2633.2"; gene_id "MSTRG.2633"; exon_number "1";	1	ensembl	CDS	180076857	180076859	.	+	0	gene_id "ENSSSCG00000031354"; gene_version "3"; transcript_id "ENSSSCT00000094980"; transcript_version "1"; exon_number "5"; gene_name "DMAC2L"; gene_source "ensembl"; gene_biotype "protein_coding"; transcript_name "DMAC2L-201"; transcript_source "ensembl"; transcript_biotype "protein_coding"; protein_id "ENSSSCP00000080422"; protein_version "1";
1	StringTie	exon	180147405	180147982	.	+	.	transcript_id "MSTRG.2633.2"; gene_id "MSTRG.2633"; exon_number "1";	1	ensembl	exon	180076862	180076888	.	+	.	gene_id "ENSSSCG00000031354"; gene_version "3"; transcript_id "ENSSSCT00000094980"; transcript_version "1"; exon_number "6"; gene_name "DMAC2L"; gene_source "ensembl"; gene_biotype "protein_coding"; transcript_name "DMAC2L-201"; transcript_source "ensembl"; transcript_biotype "protein_coding"; exon_id "ENSSSCE00000490279"; exon_version "1";
1	StringTie	exon	180147405	180147982	.	+	.	transcript_id "MSTRG.2633.2"; gene_id "MSTRG.2633"; exon_number "1";	1	ensembl	CDS	180076862	180076885	.	+	0	gene_id "ENSSSCG00000031354"; gene_version "3"; transcript_id "ENSSSCT00000094980"; transcript_version "1"; exon_number "6"; gene_name "DMAC2L"; gene_source "ensembl"; gene_biotype "protein_coding"; transcript_name "DMAC2L-201"; transcript_source "ensembl"; transcript_biotype "protein_coding"; protein_id "ENSSSCP00000080422"; protein_version "1";
1	StringTie	exon	180147405	180147982	.	+	.	transcript_id "MSTRG.2633.2"; gene_id "MSTRG.2633"; exon_number "1";	1	ensembl	stop_codon	180076886	180076888	.	+	0	gene_id "ENSSSCG00000031354"; gene_version "3"; transcript_id "ENSSSCT00000094980"; transcript_version "1"; exon_number "6"; gene_name "DMAC2L"; gene_source "ensembl"; gene_biotype "protein_coding"; transcript_name "DMAC2L-201"; transcript_source "ensembl"; transcript_biotype "protein_coding";
1	StringTie	exon	180147405	180147982	.	+	.	transcript_id "MSTRG.2633.2"; gene_id "MSTRG.2633"; exon_number "1";	1	ensembl	exon	180076632	180076840	.	+	.	gene_id "ENSSSCG00000031354"; gene_version "3"; transcript_id "ENSSSCT00000094790"; transcript_version "1"; exon_number "4"; gene_name "DMAC2L"; gene_source "ensembl"; gene_biotype "protein_coding"; transcript_name "DMAC2L-202"; transcript_source "ensembl"; transcript_biotype "protein_coding"; exon_id "ENSSSCE00000043023"; exon_version "1";
1	StringTie	exon	180147405	180147982	.	+	.	transcript_id "MSTRG.2633.2"; gene_id "MSTRG.2633"; exon_number "1";	1	ensembl	CDS	180076632	180076840	.	+	1	gene_id "ENSSSCG00000031354"; gene_version "3"; transcript_id "ENSSSCT00000094790"; transcript_version "1"; exon_number "4"; gene_name "DMAC2L"; gene_source "ensembl"; gene_biotype "protein_coding"; transcript_name "DMAC2L-202"; transcript_source "ensembl"; transcript_biotype "protein_coding"; protein_id "ENSSSCP00000075286"; protein_version "1";
1	StringTie	exon	180147405	180147982	.	+	.	transcript_id "MSTRG.2633.2"; gene_id "MSTRG.2633"; exon_number "1";	1	ensembl	exon	180079861	180079883	.	+	.	gene_id "ENSSSCG00000031354"; gene_version "3"; transcript_id "ENSSSCT00000094790"; transcript_version "1"; exon_number "5"; gene_name "DMAC2L"; gene_source "ensembl"; gene_biotype "protein_coding"; transcript_name "DMAC2L-202"; transcript_source "ensembl"; transcript_biotype "protein_coding"; exon_id "ENSSSCE00000515042"; exon_version "1";
1	StringTie	exon	180147405	180147982	.	+	.	transcript_id "MSTRG.2633.2"; gene_id "MSTRG.2633"; exon_number "1";	1	ensembl	CDS	180079861	180079880	.	+	2	gene_id "ENSSSCG00000031354"; gene_version "3"; transcript_id "ENSSSCT00000094790"; transcript_version "1"; exon_number "5"; gene_name "DMAC2L"; gene_source "ensembl"; gene_biotype "protein_coding"; transcript_name "DMAC2L-202"; transcript_source "ensembl"; transcript_biotype "protein_coding"; protein_id "ENSSSCP00000075286"; protein_version "1";
1	StringTie	exon	180147405	180147982	.	+	.	transcript_id "MSTRG.2633.2"; gene_id "MSTRG.2633"; exon_number "1";	1	ensembl	stop_codon	180079881	180079883	.	+	0	gene_id "ENSSSCG00000031354"; gene_version "3"; transcript_id "ENSSSCT00000094790"; transcript_version "1"; exon_number "5"; gene_name "DMAC2L"; gene_source "ensembl"; gene_biotype "protein_coding"; transcript_name "DMAC2L-202"; transcript_source "ensembl"; transcript_biotype "protein_coding";
1	StringTie	exon	180147405	180147982	.	+	.	transcript_id "MSTRG.2633.2"; gene_id "MSTRG.2633"; exon_number "1";	1	ensembl	exon	180076632	180076840	.	+	.	gene_id "ENSSSCG00000031354"; gene_version "3"; transcript_id "ENSSSCT00000041018"; transcript_version "3"; exon_number "4"; gene_name "DMAC2L"; gene_source "ensembl"; gene_biotype "protein_coding"; transcript_name "DMAC2L-203"; transcript_source "ensembl"; transcript_biotype "protein_coding"; exon_id "ENSSSCE00000043023"; exon_version "1";
1	StringTie	exon	180147405	180147982	.	+	.	transcript_id "MSTRG.2633.2"; gene_id "MSTRG.2633"; exon_number "1";	1	ensembl	CDS	180076632	180076840	.	+	1	gene_id "ENSSSCG00000031354"; gene_version "3"; transcript_id "ENSSSCT00000041018"; transcript_version "3"; exon_number "4"; gene_name "DMAC2L"; gene_source "ensembl"; gene_biotype "protein_coding"; transcript_name "DMAC2L-203"; transcript_source "ensembl"; transcript_biotype "protein_coding"; protein_id "ENSSSCP00000035990"; protein_version "1";
1	StringTie	exon	180147405	180147982	.	+	.	transcript_id "MSTRG.2633.2"; gene_id "MSTRG.2633"; exon_number "1";	1	ensembl	exon	180077400	180077571	.	+	.	gene_id "ENSSSCG00000031354"; gene_version "3"; transcript_id "ENSSSCT00000041018"; transcript_version "3"; exon_number "5"; gene_name "DMAC2L"; gene_source "ensembl"; gene_biotype "protein_coding"; transcript_name "DMAC2L-203"; transcript_source "ensembl"; transcript_biotype "protein_coding"; exon_id "ENSSSCE00000043024"; exon_version "1";
1	StringTie	exon	180147405	180147982	.	+	.	transcript_id "MSTRG.2633.2"; gene_id "MSTRG.2633"; exon_number "1";	1	ensembl	CDS	180077400	180077571	.	+	2	gene_id "ENSSSCG00000031354"; gene_version "3"; transcript_id "ENSSSCT00000041018"; transcript_version "3"; exon_number "5"; gene_name "DMAC2L"; gene_source "ensembl"; gene_biotype "protein_coding"; transcript_name "DMAC2L-203"; transcript_source "ensembl"; transcript_biotype "protein_coding"; protein_id "ENSSSCP00000035990"; protein_version "1";
1	StringTie	exon	180147405	180147982	.	+	.	transcript_id "MSTRG.2633.2"; gene_id "MSTRG.2633"; exon_number "1";	1	ensembl	exon	180079861	180081404	.	+	.	gene_id "ENSSSCG00000031354"; gene_version "3"; transcript_id "ENSSSCT00000041018"; transcript_version "3"; exon_number "6"; gene_name "DMAC2L"; gene_source "ensembl"; gene_biotype "protein_coding"; transcript_name "DMAC2L-203"; transcript_source "ensembl"; transcript_biotype "protein_coding"; exon_id "ENSSSCE00000285039"; exon_version "3";
1	StringTie	exon	180147405	180147982	.	+	.	transcript_id "MSTRG.2633.2"; gene_id "MSTRG.2633"; exon_number "1";	1	ensembl	CDS	180079861	180079972	.	+	1	gene_id "ENSSSCG00000031354"; gene_version "3"; transcript_id "ENSSSCT00000041018"; transcript_version "3"; exon_number "6"; gene_name "DMAC2L"; gene_source "ensembl"; gene_biotype "protein_coding"; transcript_name "DMAC2L-203"; transcript_source "ensembl"; transcript_biotype "protein_coding"; protein_id "ENSSSCP00000035990"; protein_version "1";
1	StringTie	exon	180147405	180147982	.	+	.	transcript_id "MSTRG.2633.2"; gene_id "MSTRG.2633"; exon_number "1";	1	ensembl	stop_codon	180079973	180079975	.	+	0	gene_id "ENSSSCG00000031354"; gene_version "3"; transcript_id "ENSSSCT00000041018"; transcript_version "3"; exon_number "6"; gene_name "DMAC2L"; gene_source "ensembl"; gene_biotype "protein_coding"; transcript_name "DMAC2L-203"; transcript_source "ensembl"; transcript_biotype "protein_coding";
1	StringTie	exon	180147405	180147982	.	+	.	transcript_id "MSTRG.2633.2"; gene_id "MSTRG.2633"; exon_number "1";	1	ensembl	three_prime_utr	180079976	180081404	.	+	.	gene_id "ENSSSCG00000031354"; gene_version "3"; transcript_id "ENSSSCT00000041018"; transcript_version "3"; gene_name "DMAC2L"; gene_source "ensembl"; gene_biotype "protein_coding"; transcript_name "DMAC2L-203"; transcript_source "ensembl"; transcript_biotype "protein_coding";
1	StringTie	exon	180147405	180147982	.	+	.	transcript_id "MSTRG.2633.2"; gene_id "MSTRG.2633"; exon_number "1";	1	ensembl	exon	180076632	180076840	.	+	.	gene_id "ENSSSCG00000031354"; gene_version "3"; transcript_id "ENSSSCT00000039137"; transcript_version "2"; exon_number "3"; gene_name "DMAC2L"; gene_source "ensembl"; gene_biotype "protein_coding"; transcript_name "DMAC2L-204"; transcript_source "ensembl"; transcript_biotype "protein_coding"; exon_id "ENSSSCE00000043023"; exon_version "1";
1	StringTie	exon	180147405	180147982	.	+	.	transcript_id "MSTRG.2633.2"; gene_id "MSTRG.2633"; exon_number "1";	1	ensembl	CDS	180076632	180076840	.	+	1	gene_id "ENSSSCG00000031354"; gene_version "3"; transcript_id "ENSSSCT00000039137"; transcript_version "2"; exon_number "3"; gene_name "DMAC2L"; gene_source "ensembl"; gene_biotype "protein_coding"; transcript_name "DMAC2L-204"; transcript_source "ensembl"; transcript_biotype "protein_coding"; protein_id "ENSSSCP00000034229"; protein_version "1";
1	StringTie	exon	180147405	180147982	.	+	.	transcript_id "MSTRG.2633.2"; gene_id "MSTRG.2633"; exon_number "1";	1	ensembl	exon	180077400	180077571	.	+	.	gene_id "ENSSSCG00000031354"; gene_version "3"; transcript_id "ENSSSCT00000039137"; transcript_version "2"; exon_number "4"; gene_name "DMAC2L"; gene_source "ensembl"; gene_biotype "protein_coding"; transcript_name "DMAC2L-204"; transcript_source "ensembl"; transcript_biotype "protein_coding"; exon_id "ENSSSCE00000043024"; exon_version "1";
1	StringTie	exon	180147405	180147982	.	+	.	transcript_id "MSTRG.2633.2"; gene_id "MSTRG.2633"; exon_number "1";	1	ensembl	CDS	180077400	180077571	.	+	2	gene_id "ENSSSCG00000031354"; gene_version "3"; transcript_id "ENSSSCT00000039137"; transcript_version "2"; exon_number "4"; gene_name "DMAC2L"; gene_source "ensembl"; gene_biotype "protein_coding"; transcript_name "DMAC2L-204"; transcript_source "ensembl"; transcript_biotype "protein_coding"; protein_id "ENSSSCP00000034229"; protein_version "1";
1	StringTie	exon	180147405	180147982	.	+	.	transcript_id "MSTRG.2633.2"; gene_id "MSTRG.2633"; exon_number "1";	1	ensembl	exon	180079861	180081412	.	+	.	gene_id "ENSSSCG00000031354"; gene_version "3"; transcript_id "ENSSSCT00000039137"; transcript_version "2"; exon_number "5"; gene_name "DMAC2L"; gene_source "ensembl"; gene_biotype "protein_coding"; transcript_name "DMAC2L-204"; transcript_source "ensembl"; transcript_biotype "protein_coding"; exon_id "ENSSSCE00000294769"; exon_version "1";
1	StringTie	exon	180147405	180147982	.	+	.	transcript_id "MSTRG.2633.2"; gene_id "MSTRG.2633"; exon_number "1";	1	ensembl	CDS	180079861	180079972	.	+	1	gene_id "ENSSSCG00000031354"; gene_version "3"; transcript_id "ENSSSCT00000039137"; transcript_version "2"; exon_number "5"; gene_name "DMAC2L"; gene_source "ensembl"; gene_biotype "protein_coding"; transcript_name "DMAC2L-204"; transcript_source "ensembl"; transcript_biotype "protein_coding"; protein_id "ENSSSCP00000034229"; protein_version "1";
1	StringTie	exon	180147405	180147982	.	+	.	transcript_id "MSTRG.2633.2"; gene_id "MSTRG.2633"; exon_number "1";	1	ensembl	stop_codon	180079973	180079975	.	+	0	gene_id "ENSSSCG00000031354"; gene_version "3"; transcript_id "ENSSSCT00000039137"; transcript_version "2"; exon_number "5"; gene_name "DMAC2L"; gene_source "ensembl"; gene_biotype "protein_coding"; transcript_name "DMAC2L-204"; transcript_source "ensembl"; transcript_biotype "protein_coding";
1	StringTie	exon	180147405	180147982	.	+	.	transcript_id "MSTRG.2633.2"; gene_id "MSTRG.2633"; exon_number "1";	1	ensembl	three_prime_utr	180079976	180081412	.	+	.	gene_id "ENSSSCG00000031354"; gene_version "3"; transcript_id "ENSSSCT00000039137"; transcript_version "2"; gene_name "DMAC2L"; gene_source "ensembl"; gene_biotype "protein_coding"; transcript_name "DMAC2L-204"; transcript_source "ensembl"; transcript_biotype "protein_coding";
1	StringTie	exon	180147405	180147982	.	+	.	transcript_id "MSTRG.2633.2"; gene_id "MSTRG.2633"; exon_number "1";	1	ensembl	exon	180090603	180090685	.	-	.	gene_id "ENSSSCG00000034516"; gene_version "3"; transcript_id "ENSSSCT00000078310"; transcript_version "2"; exon_number "7"; gene_name "CDKL1"; gene_source "ensembl"; gene_biotype "protein_coding"; transcript_name "CDKL1-201"; transcript_source "ensembl"; transcript_biotype "protein_coding"; exon_id "ENSSSCE00000043029"; exon_version "1";
1	StringTie	exon	180147405	180147982	.	+	.	transcript_id "MSTRG.2633.2"; gene_id "MSTRG.2633"; exon_number "1";	1	ensembl	CDS	180090603	180090685	.	-	2	gene_id "ENSSSCG00000034516"; gene_version "3"; transcript_id "ENSSSCT00000078310"; transcript_version "2"; exon_number "7"; gene_name "CDKL1"; gene_source "ensembl"; gene_biotype "protein_coding"; transcript_name "CDKL1-201"; transcript_source "ensembl"; transcript_biotype "protein_coding"; protein_id "ENSSSCP00000069969"; protein_version "1";
1	StringTie	exon	180147405	180147982	.	+	.	transcript_id "MSTRG.2633.2"; gene_id "MSTRG.2633"; exon_number "1";	1	ensembl	exon	180087569	180087625	.	-	.	gene_id "ENSSSCG00000034516"; gene_version "3"; transcript_id "ENSSSCT00000078310"; transcript_version "2"; exon_number "8"; gene_name "CDKL1"; gene_source "ensembl"; gene_biotype "protein_coding"; transcript_name "CDKL1-201"; transcript_source "ensembl"; transcript_biotype "protein_coding"; exon_id "ENSSSCE00000043030"; exon_version "1";
1	StringTie	exon	180147405	180147982	.	+	.	transcript_id "MSTRG.2633.2"; gene_id "MSTRG.2633"; exon_number "1";	1	ensembl	CDS	180087569	180087625	.	-	0	gene_id "ENSSSCG00000034516"; gene_version "3"; transcript_id "ENSSSCT00000078310"; transcript_version "2"; exon_number "8"; gene_name "CDKL1"; gene_source "ensembl"; gene_biotype "protein_coding"; transcript_name "CDKL1-201"; transcript_source "ensembl"; transcript_biotype "protein_coding"; protein_id "ENSSSCP00000069969"; protein_version "1";
1	StringTie	exon	180147405	180147982	.	+	.	transcript_id "MSTRG.2633.2"; gene_id "MSTRG.2633"; exon_number "1";	1	ensembl	exon	180086641	180086649	.	-	.	gene_id "ENSSSCG00000034516"; gene_version "3"; transcript_id "ENSSSCT00000078310"; transcript_version "2"; exon_number "9"; gene_name "CDKL1"; gene_source "ensembl"; gene_biotype "protein_coding"; transcript_name "CDKL1-201"; transcript_source "ensembl"; transcript_biotype "protein_coding"; exon_id "ENSSSCE00000491868"; exon_version "1";
1	StringTie	exon	180147405	180147982	.	+	.	transcript_id "MSTRG.2633.2"; gene_id "MSTRG.2633"; exon_number "1";	1	ensembl	CDS	180086641	180086649	.	-	0	gene_id "ENSSSCG00000034516"; gene_version "3"; transcript_id "ENSSSCT00000078310"; transcript_version "2"; exon_number "9"; gene_name "CDKL1"; gene_source "ensembl"; gene_biotype "protein_coding"; transcript_name "CDKL1-201"; transcript_source "ensembl"; transcript_biotype "protein_coding"; protein_id "ENSSSCP00000069969"; protein_version "1";
1	StringTie	exon	180147405	180147982	.	+	.	transcript_id "MSTRG.2633.2"; gene_id "MSTRG.2633"; exon_number "1";	1	ensembl	exon	180086618	180086638	.	-	.	gene_id "ENSSSCG00000034516"; gene_version "3"; transcript_id "ENSSSCT00000078310"; transcript_version "2"; exon_number "10"; gene_name "CDKL1"; gene_source "ensembl"; gene_biotype "protein_coding"; transcript_name "CDKL1-201"; transcript_source "ensembl"; transcript_biotype "protein_coding"; exon_id "ENSSSCE00000419092"; exon_version "1";
1	StringTie	exon	180147405	180147982	.	+	.	transcript_id "MSTRG.2633.2"; gene_id "MSTRG.2633"; exon_number "1";	1	ensembl	CDS	180086618	180086638	.	-	0	gene_id "ENSSSCG00000034516"; gene_version "3"; transcript_id "ENSSSCT00000078310"; transcript_version "2"; exon_number "10"; gene_name "CDKL1"; gene_source "ensembl"; gene_biotype "protein_coding"; transcript_name "CDKL1-201"; transcript_source "ensembl"; transcript_biotype "protein_coding"; protein_id "ENSSSCP00000069969"; protein_version "1";
1	StringTie	exon	180147405	180147982	.	+	.	transcript_id "MSTRG.2633.2"; gene_id "MSTRG.2633"; exon_number "1";	1	ensembl	exon	180090603	180090685	.	-	.	gene_id "ENSSSCG00000034516"; gene_version "3"; transcript_id "ENSSSCT00000075014"; transcript_version "2"; exon_number "7"; gene_name "CDKL1"; gene_source "ensembl"; gene_biotype "protein_coding"; transcript_name "CDKL1-202"; transcript_source "ensembl"; transcript_biotype "protein_coding"; exon_id "ENSSSCE00000043029"; exon_version "1";
1	StringTie	exon	180147405	180147982	.	+	.	transcript_id "MSTRG.2633.2"; gene_id "MSTRG.2633"; exon_number "1";	1	ensembl	CDS	180090603	180090685	.	-	2	gene_id "ENSSSCG00000034516"; gene_version "3"; transcript_id "ENSSSCT00000075014"; transcript_version "2"; exon_number "7"; gene_name "CDKL1"; gene_source "ensembl"; gene_biotype "protein_coding"; transcript_name "CDKL1-202"; transcript_source "ensembl"; transcript_biotype "protein_coding"; protein_id "ENSSSCP00000071907"; protein_version "2";
1	StringTie	exon	180147405	180147982	.	+	.	transcript_id "MSTRG.2633.2"; gene_id "MSTRG.2633"; exon_number "1";	1	ensembl	exon	180087569	180087625	.	-	.	gene_id "ENSSSCG00000034516"; gene_version "3"; transcript_id "ENSSSCT00000075014"; transcript_version "2"; exon_number "8"; gene_name "CDKL1"; gene_source "ensembl"; gene_biotype "protein_coding"; transcript_name "CDKL1-202"; transcript_source "ensembl"; transcript_biotype "protein_coding"; exon_id "ENSSSCE00000043030"; exon_version "1";
1	StringTie	exon	180147405	180147982	.	+	.	transcript_id "MSTRG.2633.2"; gene_id "MSTRG.2633"; exon_number "1";	1	ensembl	CDS	180087569	180087625	.	-	0	gene_id "ENSSSCG00000034516"; gene_version "3"; transcript_id "ENSSSCT00000075014"; transcript_version "2"; exon_number "8"; gene_name "CDKL1"; gene_source "ensembl"; gene_biotype "protein_coding"; transcript_name "CDKL1-202"; transcript_source "ensembl"; transcript_biotype "protein_coding"; protein_id "ENSSSCP00000071907"; protein_version "2";
1	StringTie	exon	180147405	180147982	.	+	.	transcript_id "MSTRG.2633.2"; gene_id "MSTRG.2633"; exon_number "1";	1	ensembl	exon	180086222	180086369	.	-	.	gene_id "ENSSSCG00000034516"; gene_version "3"; transcript_id "ENSSSCT00000075014"; transcript_version "2"; exon_number "9"; gene_name "CDKL1"; gene_source "ensembl"; gene_biotype "protein_coding"; transcript_name "CDKL1-202"; transcript_source "ensembl"; transcript_biotype "protein_coding"; exon_id "ENSSSCE00000414812"; exon_version "2";
1	StringTie	exon	180147405	180147982	.	+	.	transcript_id "MSTRG.2633.2"; gene_id "MSTRG.2633"; exon_number "1";	1	ensembl	CDS	180086222	180086369	.	-	0	gene_id "ENSSSCG00000034516"; gene_version "3"; transcript_id "ENSSSCT00000075014"; transcript_version "2"; exon_number "9"; gene_name "CDKL1"; gene_source "ensembl"; gene_biotype "protein_coding"; transcript_name "CDKL1-202"; transcript_source "ensembl"; transcript_biotype "protein_coding"; protein_id "ENSSSCP00000071907"; protein_version "2";
1	StringTie	exon	180147405	180147982	.	+	.	transcript_id "MSTRG.2633.2"; gene_id "MSTRG.2633"; exon_number "1";	1	ensembl	exon	180086178	180086200	.	-	.	gene_id "ENSSSCG00000034516"; gene_version "3"; transcript_id "ENSSSCT00000075014"; transcript_version "2"; exon_number "10"; gene_name "CDKL1"; gene_source "ensembl"; gene_biotype "protein_coding"; transcript_name "CDKL1-202"; transcript_source "ensembl"; transcript_biotype "protein_coding"; exon_id "ENSSSCE00000429433"; exon_version "2";
1	StringTie	exon	180147405	180147982	.	+	.	transcript_id "MSTRG.2633.2"; gene_id "MSTRG.2633"; exon_number "1";	1	ensembl	CDS	180086178	180086200	.	-	2	gene_id "ENSSSCG00000034516"; gene_version "3"; transcript_id "ENSSSCT00000075014"; transcript_version "2"; exon_number "10"; gene_name "CDKL1"; gene_source "ensembl"; gene_biotype "protein_coding"; transcript_name "CDKL1-202"; transcript_source "ensembl"; transcript_biotype "protein_coding"; protein_id "ENSSSCP00000071907"; protein_version "2";
1	StringTie	exon	180147405	180147982	.	+	.	transcript_id "MSTRG.2633.2"; gene_id "MSTRG.2633"; exon_number "1";	1	ensembl	exon	180084102	180084209	.	-	.	gene_id "ENSSSCG00000034516"; gene_version "3"; transcript_id "ENSSSCT00000075014"; transcript_version "2"; exon_number "11"; gene_name "CDKL1"; gene_source "ensembl"; gene_biotype "protein_coding"; transcript_name "CDKL1-202"; transcript_source "ensembl"; transcript_biotype "protein_coding"; exon_id "ENSSSCE00000409717"; exon_version "1";
1	StringTie	exon	180147405	180147982	.	+	.	transcript_id "MSTRG.2633.2"; gene_id "MSTRG.2633"; exon_number "1";	1	ensembl	CDS	180084105	180084209	.	-	0	gene_id "ENSSSCG00000034516"; gene_version "3"; transcript_id "ENSSSCT00000075014"; transcript_version "2"; exon_number "11"; gene_name "CDKL1"; gene_source "ensembl"; gene_biotype "protein_coding"; transcript_name "CDKL1-202"; transcript_source "ensembl"; transcript_biotype "protein_coding"; protein_id "ENSSSCP00000071907"; protein_version "2";
1	StringTie	exon	180147405	180147982	.	+	.	transcript_id "MSTRG.2633.2"; gene_id "MSTRG.2633"; exon_number "1";	1	ensembl	stop_codon	180084102	180084104	.	-	0	gene_id "ENSSSCG00000034516"; gene_version "3"; transcript_id "ENSSSCT00000075014"; transcript_version "2"; exon_number "11"; gene_name "CDKL1"; gene_source "ensembl"; gene_biotype "protein_coding"; transcript_name "CDKL1-202"; transcript_source "ensembl"; transcript_biotype "protein_coding";
1	StringTie	exon	180147405	180147982	.	+	.	transcript_id "MSTRG.2633.2"; gene_id "MSTRG.2633"; exon_number "1";	1	ensembl	exon	180090603	180090685	.	-	.	gene_id "ENSSSCG00000034516"; gene_version "3"; transcript_id "ENSSSCT00000061065"; transcript_version "2"; exon_number "7"; gene_name "CDKL1"; gene_source "ensembl"; gene_biotype "protein_coding"; transcript_name "CDKL1-203"; transcript_source "ensembl"; transcript_biotype "protein_coding"; exon_id "ENSSSCE00000043029"; exon_version "1";
1	StringTie	exon	180147405	180147982	.	+	.	transcript_id "MSTRG.2633.2"; gene_id "MSTRG.2633"; exon_number "1";	1	ensembl	CDS	180090603	180090685	.	-	2	gene_id "ENSSSCG00000034516"; gene_version "3"; transcript_id "ENSSSCT00000061065"; transcript_version "2"; exon_number "7"; gene_name "CDKL1"; gene_source "ensembl"; gene_biotype "protein_coding"; transcript_name "CDKL1-203"; transcript_source "ensembl"; transcript_biotype "protein_coding"; protein_id "ENSSSCP00000036467"; protein_version "1";
1	StringTie	exon	180147405	180147982	.	+	.	transcript_id "MSTRG.2633.2"; gene_id "MSTRG.2633"; exon_number "1";	1	ensembl	exon	180087569	180087625	.	-	.	gene_id "ENSSSCG00000034516"; gene_version "3"; transcript_id "ENSSSCT00000061065"; transcript_version "2"; exon_number "8"; gene_name "CDKL1"; gene_source "ensembl"; gene_biotype "protein_coding"; transcript_name "CDKL1-203"; transcript_source "ensembl"; transcript_biotype "protein_coding"; exon_id "ENSSSCE00000043030"; exon_version "1";
1	StringTie	exon	180147405	180147982	.	+	.	transcript_id "MSTRG.2633.2"; gene_id "MSTRG.2633"; exon_number "1";	1	ensembl	CDS	180087569	180087625	.	-	0	gene_id "ENSSSCG00000034516"; gene_version "3"; transcript_id "ENSSSCT00000061065"; transcript_version "2"; exon_number "8"; gene_name "CDKL1"; gene_source "ensembl"; gene_biotype "protein_coding"; transcript_name "CDKL1-203"; transcript_source "ensembl"; transcript_biotype "protein_coding"; protein_id "ENSSSCP00000036467"; protein_version "1";
1	StringTie	exon	180147405	180147982	.	+	.	transcript_id "MSTRG.2633.2"; gene_id "MSTRG.2633"; exon_number "1";	1	ensembl	exon	180086214	180086369	.	-	.	gene_id "ENSSSCG00000034516"; gene_version "3"; transcript_id "ENSSSCT00000061065"; transcript_version "2"; exon_number "9"; gene_name "CDKL1"; gene_source "ensembl"; gene_biotype "protein_coding"; transcript_name "CDKL1-203"; transcript_source "ensembl"; transcript_biotype "protein_coding"; exon_id "ENSSSCE00000043031"; exon_version "1";
1	StringTie	exon	180147405	180147982	.	+	.	transcript_id "MSTRG.2633.2"; gene_id "MSTRG.2633"; exon_number "1";	1	ensembl	CDS	180086214	180086369	.	-	0	gene_id "ENSSSCG00000034516"; gene_version "3"; transcript_id "ENSSSCT00000061065"; transcript_version "2"; exon_number "9"; gene_name "CDKL1"; gene_source "ensembl"; gene_biotype "protein_coding"; transcript_name "CDKL1-203"; transcript_source "ensembl"; transcript_biotype "protein_coding"; protein_id "ENSSSCP00000036467"; protein_version "1";
1	StringTie	exon	180147405	180147982	.	+	.	transcript_id "MSTRG.2633.2"; gene_id "MSTRG.2633"; exon_number "1";	1	ensembl	exon	180079859	180084209	.	-	.	gene_id "ENSSSCG00000034516"; gene_version "3"; transcript_id "ENSSSCT00000061065"; transcript_version "2"; exon_number "10"; gene_name "CDKL1"; gene_source "ensembl"; gene_biotype "protein_coding"; transcript_name "CDKL1-203"; transcript_source "ensembl"; transcript_biotype "protein_coding"; exon_id "ENSSSCE00000312854"; exon_version "2";
1	StringTie	exon	180147405	180147982	.	+	.	transcript_id "MSTRG.2633.2"; gene_id "MSTRG.2633"; exon_number "1";	1	ensembl	CDS	180084105	180084209	.	-	0	gene_id "ENSSSCG00000034516"; gene_version "3"; transcript_id "ENSSSCT00000061065"; transcript_version "2"; exon_number "10"; gene_name "CDKL1"; gene_source "ensembl"; gene_biotype "protein_coding"; transcript_name "CDKL1-203"; transcript_source "ensembl"; transcript_biotype "protein_coding"; protein_id "ENSSSCP00000036467"; protein_version "1";
1	StringTie	exon	180147405	180147982	.	+	.	transcript_id "MSTRG.2633.2"; gene_id "MSTRG.2633"; exon_number "1";	1	ensembl	stop_codon	180084102	180084104	.	-	0	gene_id "ENSSSCG00000034516"; gene_version "3"; transcript_id "ENSSSCT00000061065"; transcript_version "2"; exon_number "10"; gene_name "CDKL1"; gene_source "ensembl"; gene_biotype "protein_coding"; transcript_name "CDKL1-203"; transcript_source "ensembl"; transcript_biotype "protein_coding";
1	StringTie	exon	180147405	180147982	.	+	.	transcript_id "MSTRG.2633.2"; gene_id "MSTRG.2633"; exon_number "1";	1	ensembl	exon	180078659	180079747	.	-	.	gene_id "ENSSSCG00000034516"; gene_version "3"; transcript_id "ENSSSCT00000061065"; transcript_version "2"; exon_number "11"; gene_name "CDKL1"; gene_source "ensembl"; gene_biotype "protein_coding"; transcript_name "CDKL1-203"; transcript_source "ensembl"; transcript_biotype "protein_coding"; exon_id "ENSSSCE00000414625"; exon_version "1";
1	StringTie	exon	180147405	180147982	.	+	.	transcript_id "MSTRG.2633.2"; gene_id "MSTRG.2633"; exon_number "1";	1	ensembl	three_prime_utr	180079859	180084101	.	-	.	gene_id "ENSSSCG00000034516"; gene_version "3"; transcript_id "ENSSSCT00000061065"; transcript_version "2"; gene_name "CDKL1"; gene_source "ensembl"; gene_biotype "protein_coding"; transcript_name "CDKL1-203"; transcript_source "ensembl"; transcript_biotype "protein_coding";
1	StringTie	exon	180147405	180147982	.	+	.	transcript_id "MSTRG.2633.2"; gene_id "MSTRG.2633"; exon_number "1";	1	ensembl	three_prime_utr	180078659	180079747	.	-	.	gene_id "ENSSSCG00000034516"; gene_version "3"; transcript_id "ENSSSCT00000061065"; transcript_version "2"; gene_name "CDKL1"; gene_source "ensembl"; gene_biotype "protein_coding"; transcript_name "CDKL1-203"; transcript_source "ensembl"; transcript_biotype "protein_coding";
1	StringTie	exon	180147405	180147982	.	+	.	transcript_id "MSTRG.2633.2"; gene_id "MSTRG.2633"; exon_number "1";	1	ensembl	exon	180097790	180097862	.	-	.	gene_id "ENSSSCG00000034516"; gene_version "3"; transcript_id "ENSSSCT00000078310"; transcript_version "2"; exon_number "4"; gene_name "CDKL1"; gene_source "ensembl"; gene_biotype "protein_coding"; transcript_name "CDKL1-201"; transcript_source "ensembl"; transcript_biotype "protein_coding"; exon_id "ENSSSCE00000043026"; exon_version "2";
1	StringTie	exon	180147405	180147982	.	+	.	transcript_id "MSTRG.2633.2"; gene_id "MSTRG.2633"; exon_number "1";	1	ensembl	CDS	180097790	180097862	.	-	1	gene_id "ENSSSCG00000034516"; gene_version "3"; transcript_id "ENSSSCT00000078310"; transcript_version "2"; exon_number "4"; gene_name "CDKL1"; gene_source "ensembl"; gene_biotype "protein_coding"; transcript_name "CDKL1-201"; transcript_source "ensembl"; transcript_biotype "protein_coding"; protein_id "ENSSSCP00000069969"; protein_version "1";
1	StringTie	exon	180147405	180147982	.	+	.	transcript_id "MSTRG.2633.2"; gene_id "MSTRG.2633"; exon_number "1";	1	ensembl	exon	180095396	180095486	.	-	.	gene_id "ENSSSCG00000034516"; gene_version "3"; transcript_id "ENSSSCT00000078310"; transcript_version "2"; exon_number "5"; gene_name "CDKL1"; gene_source "ensembl"; gene_biotype "protein_coding"; transcript_name "CDKL1-201"; transcript_source "ensembl"; transcript_biotype "protein_coding"; exon_id "ENSSSCE00000043027"; exon_version "1";
1	StringTie	exon	180147405	180147982	.	+	.	transcript_id "MSTRG.2633.2"; gene_id "MSTRG.2633"; exon_number "1";	1	ensembl	CDS	180095396	180095486	.	-	0	gene_id "ENSSSCG00000034516"; gene_version "3"; transcript_id "ENSSSCT00000078310"; transcript_version "2"; exon_number "5"; gene_name "CDKL1"; gene_source "ensembl"; gene_biotype "protein_coding"; transcript_name "CDKL1-201"; transcript_source "ensembl"; transcript_biotype "protein_coding"; protein_id "ENSSSCP00000069969"; protein_version "1";
1	StringTie	exon	180147405	180147982	.	+	.	transcript_id "MSTRG.2633.2"; gene_id "MSTRG.2633"; exon_number "1";	1	ensembl	exon	180097790	180097862	.	-	.	gene_id "ENSSSCG00000034516"; gene_version "3"; transcript_id "ENSSSCT00000075014"; transcript_version "2"; exon_number "4"; gene_name "CDKL1"; gene_source "ensembl"; gene_biotype "protein_coding"; transcript_name "CDKL1-202"; transcript_source "ensembl"; transcript_biotype "protein_coding"; exon_id "ENSSSCE00000043026"; exon_version "2";
1	StringTie	exon	180147405	180147982	.	+	.	transcript_id "MSTRG.2633.2"; gene_id "MSTRG.2633"; exon_number "1";	1	ensembl	CDS	180097790	180097862	.	-	1	gene_id "ENSSSCG00000034516"; gene_version "3"; transcript_id "ENSSSCT00000075014"; transcript_version "2"; exon_number "4"; gene_name "CDKL1"; gene_source "ensembl"; gene_biotype "protein_coding"; transcript_name "CDKL1-202"; transcript_source "ensembl"; transcript_biotype "protein_coding"; protein_id "ENSSSCP00000071907"; protein_version "2";
1	StringTie	exon	180147405	180147982	.	+	.	transcript_id "MSTRG.2633.2"; gene_id "MSTRG.2633"; exon_number "1";	1	ensembl	exon	180095396	180095486	.	-	.	gene_id "ENSSSCG00000034516"; gene_version "3"; transcript_id "ENSSSCT00000075014"; transcript_version "2"; exon_number "5"; gene_name "CDKL1"; gene_source "ensembl"; gene_biotype "protein_coding"; transcript_name "CDKL1-202"; transcript_source "ensembl"; transcript_biotype "protein_coding"; exon_id "ENSSSCE00000043027"; exon_version "1";
1	StringTie	exon	180147405	180147982	.	+	.	transcript_id "MSTRG.2633.2"; gene_id "MSTRG.2633"; exon_number "1";	1	ensembl	CDS	180095396	180095486	.	-	0	gene_id "ENSSSCG00000034516"; gene_version "3"; transcript_id "ENSSSCT00000075014"; transcript_version "2"; exon_number "5"; gene_name "CDKL1"; gene_source "ensembl"; gene_biotype "protein_coding"; transcript_name "CDKL1-202"; transcript_source "ensembl"; transcript_biotype "protein_coding"; protein_id "ENSSSCP00000071907"; protein_version "2";
1	StringTie	exon	180147405	180147982	.	+	.	transcript_id "MSTRG.2633.2"; gene_id "MSTRG.2633"; exon_number "1";	1	ensembl	exon	180097790	180097862	.	-	.	gene_id "ENSSSCG00000034516"; gene_version "3"; transcript_id "ENSSSCT00000061065"; transcript_version "2"; exon_number "4"; gene_name "CDKL1"; gene_source "ensembl"; gene_biotype "protein_coding"; transcript_name "CDKL1-203"; transcript_source "ensembl"; transcript_biotype "protein_coding"; exon_id "ENSSSCE00000043026"; exon_version "2";
1	StringTie	exon	180147405	180147982	.	+	.	transcript_id "MSTRG.2633.2"; gene_id "MSTRG.2633"; exon_number "1";	1	ensembl	CDS	180097790	180097862	.	-	1	gene_id "ENSSSCG00000034516"; gene_version "3"; transcript_id "ENSSSCT00000061065"; transcript_version "2"; exon_number "4"; gene_name "CDKL1"; gene_source "ensembl"; gene_biotype "protein_coding"; transcript_name "CDKL1-203"; transcript_source "ensembl"; transcript_biotype "protein_coding"; protein_id "ENSSSCP00000036467"; protein_version "1";
1	StringTie	exon	180147405	180147982	.	+	.	transcript_id "MSTRG.2633.2"; gene_id "MSTRG.2633"; exon_number "1";	1	ensembl	exon	180095396	180095486	.	-	.	gene_id "ENSSSCG00000034516"; gene_version "3"; transcript_id "ENSSSCT00000061065"; transcript_version "2"; exon_number "5"; gene_name "CDKL1"; gene_source "ensembl"; gene_biotype "protein_coding"; transcript_name "CDKL1-203"; transcript_source "ensembl"; transcript_biotype "protein_coding"; exon_id "ENSSSCE00000043027"; exon_version "1";
1	StringTie	exon	180147405	180147982	.	+	.	transcript_id "MSTRG.2633.2"; gene_id "MSTRG.2633"; exon_number "1";	1	ensembl	CDS	180095396	180095486	.	-	0	gene_id "ENSSSCG00000034516"; gene_version "3"; transcript_id "ENSSSCT00000061065"; transcript_version "2"; exon_number "5"; gene_name "CDKL1"; gene_source "ensembl"; gene_biotype "protein_coding"; transcript_name "CDKL1-203"; transcript_source "ensembl"; transcript_biotype "protein_coding"; protein_id "ENSSSCP00000036467"; protein_version "1";
1	StringTie	exon	180147405	180147982	.	+	.	transcript_id "MSTRG.2633.2"; gene_id "MSTRG.2633"; exon_number "1";	1	ensembl	exon	180109574	180109695	.	-	.	gene_id "ENSSSCG00000034516"; gene_version "3"; transcript_id "ENSSSCT00000078310"; transcript_version "2"; exon_number "3"; gene_name "CDKL1"; gene_source "ensembl"; gene_biotype "protein_coding"; transcript_name "CDKL1-201"; transcript_source "ensembl"; transcript_biotype "protein_coding"; exon_id "ENSSSCE00000299988"; exon_version "1";
1	StringTie	exon	180147405	180147982	.	+	.	transcript_id "MSTRG.2633.2"; gene_id "MSTRG.2633"; exon_number "1";	1	ensembl	CDS	180109574	180109695	.	-	0	gene_id "ENSSSCG00000034516"; gene_version "3"; transcript_id "ENSSSCT00000078310"; transcript_version "2"; exon_number "3"; gene_name "CDKL1"; gene_source "ensembl"; gene_biotype "protein_coding"; transcript_name "CDKL1-201"; transcript_source "ensembl"; transcript_biotype "protein_coding"; protein_id "ENSSSCP00000069969"; protein_version "1";
1	StringTie	exon	180147405	180147982	.	+	.	transcript_id "MSTRG.2633.2"; gene_id "MSTRG.2633"; exon_number "1";	1	ensembl	exon	180109574	180109695	.	-	.	gene_id "ENSSSCG00000034516"; gene_version "3"; transcript_id "ENSSSCT00000075014"; transcript_version "2"; exon_number "3"; gene_name "CDKL1"; gene_source "ensembl"; gene_biotype "protein_coding"; transcript_name "CDKL1-202"; transcript_source "ensembl"; transcript_biotype "protein_coding"; exon_id "ENSSSCE00000299988"; exon_version "1";
1	StringTie	exon	180147405	180147982	.	+	.	transcript_id "MSTRG.2633.2"; gene_id "MSTRG.2633"; exon_number "1";	1	ensembl	CDS	180109574	180109695	.	-	0	gene_id "ENSSSCG00000034516"; gene_version "3"; transcript_id "ENSSSCT00000075014"; transcript_version "2"; exon_number "3"; gene_name "CDKL1"; gene_source "ensembl"; gene_biotype "protein_coding"; transcript_name "CDKL1-202"; transcript_source "ensembl"; transcript_biotype "protein_coding"; protein_id "ENSSSCP00000071907"; protein_version "2";
1	StringTie	exon	180147405	180147982	.	+	.	transcript_id "MSTRG.2633.2"; gene_id "MSTRG.2633"; exon_number "1";	1	ensembl	exon	180109574	180109695	.	-	.	gene_id "ENSSSCG00000034516"; gene_version "3"; transcript_id "ENSSSCT00000061065"; transcript_version "2"; exon_number "3"; gene_name "CDKL1"; gene_source "ensembl"; gene_biotype "protein_coding"; transcript_name "CDKL1-203"; transcript_source "ensembl"; transcript_biotype "protein_coding"; exon_id "ENSSSCE00000299988"; exon_version "1";
1	StringTie	exon	180147405	180147982	.	+	.	transcript_id "MSTRG.2633.2"; gene_id "MSTRG.2633"; exon_number "1";	1	ensembl	CDS	180109574	180109695	.	-	0	gene_id "ENSSSCG00000034516"; gene_version "3"; transcript_id "ENSSSCT00000061065"; transcript_version "2"; exon_number "3"; gene_name "CDKL1"; gene_source "ensembl"; gene_biotype "protein_coding"; transcript_name "CDKL1-203"; transcript_source "ensembl"; transcript_biotype "protein_coding"; protein_id "ENSSSCP00000036467"; protein_version "1";
1	StringTie	exon	180147405	180147982	.	+	.	transcript_id "MSTRG.2633.2"; gene_id "MSTRG.2633"; exon_number "1";	1	ensembl	exon	180144993	180145054	.	-	.	gene_id "ENSSSCG00000034516"; gene_version "3"; transcript_id "ENSSSCT00000078310"; transcript_version "2"; exon_number "1"; gene_name "CDKL1"; gene_source "ensembl"; gene_biotype "protein_coding"; transcript_name "CDKL1-201"; transcript_source "ensembl"; transcript_biotype "protein_coding"; exon_id "ENSSSCE00000333614"; exon_version "3";
1	StringTie	exon	180147405	180147982	.	+	.	transcript_id "MSTRG.2633.2"; gene_id "MSTRG.2633"; exon_number "1";	1	ensembl	exon	180144472	180144757	.	-	.	gene_id "ENSSSCG00000034516"; gene_version "3"; transcript_id "ENSSSCT00000078310"; transcript_version "2"; exon_number "2"; gene_name "CDKL1"; gene_source "ensembl"; gene_biotype "protein_coding"; transcript_name "CDKL1-201"; transcript_source "ensembl"; transcript_biotype "protein_coding"; exon_id "ENSSSCE00000308455"; exon_version "1";
1	StringTie	exon	180147405	180147982	.	+	.	transcript_id "MSTRG.2633.2"; gene_id "MSTRG.2633"; exon_number "1";	1	ensembl	CDS	180144472	180144642	.	-	0	gene_id "ENSSSCG00000034516"; gene_version "3"; transcript_id "ENSSSCT00000078310"; transcript_version "2"; exon_number "2"; gene_name "CDKL1"; gene_source "ensembl"; gene_biotype "protein_coding"; transcript_name "CDKL1-201"; transcript_source "ensembl"; transcript_biotype "protein_coding"; protein_id "ENSSSCP00000069969"; protein_version "1";
1	StringTie	exon	180147405	180147982	.	+	.	transcript_id "MSTRG.2633.2"; gene_id "MSTRG.2633"; exon_number "1";	1	ensembl	five_prime_utr	180144993	180145054	.	-	.	gene_id "ENSSSCG00000034516"; gene_version "3"; transcript_id "ENSSSCT00000078310"; transcript_version "2"; gene_name "CDKL1"; gene_source "ensembl"; gene_biotype "protein_coding"; transcript_name "CDKL1-201"; transcript_source "ensembl"; transcript_biotype "protein_coding";
1	StringTie	exon	180147405	180147982	.	+	.	transcript_id "MSTRG.2633.2"; gene_id "MSTRG.2633"; exon_number "1";	1	ensembl	five_prime_utr	180144643	180144757	.	-	.	gene_id "ENSSSCG00000034516"; gene_version "3"; transcript_id "ENSSSCT00000078310"; transcript_version "2"; gene_name "CDKL1"; gene_source "ensembl"; gene_biotype "protein_coding"; transcript_name "CDKL1-201"; transcript_source "ensembl"; transcript_biotype "protein_coding";
1	StringTie	exon	180147405	180147982	.	+	.	transcript_id "MSTRG.2633.2"; gene_id "MSTRG.2633"; exon_number "1";	1	ensembl	exon	180144993	180145054	.	-	.	gene_id "ENSSSCG00000034516"; gene_version "3"; transcript_id "ENSSSCT00000075014"; transcript_version "2"; exon_number "1"; gene_name "CDKL1"; gene_source "ensembl"; gene_biotype "protein_coding"; transcript_name "CDKL1-202"; transcript_source "ensembl"; transcript_biotype "protein_coding"; exon_id "ENSSSCE00000333614"; exon_version "3";
1	StringTie	exon	180147405	180147982	.	+	.	transcript_id "MSTRG.2633.2"; gene_id "MSTRG.2633"; exon_number "1";	1	ensembl	exon	180144472	180144757	.	-	.	gene_id "ENSSSCG00000034516"; gene_version "3"; transcript_id "ENSSSCT00000075014"; transcript_version "2"; exon_number "2"; gene_name "CDKL1"; gene_source "ensembl"; gene_biotype "protein_coding"; transcript_name "CDKL1-202"; transcript_source "ensembl"; transcript_biotype "protein_coding"; exon_id "ENSSSCE00000308455"; exon_version "1";
1	StringTie	exon	180147405	180147982	.	+	.	transcript_id "MSTRG.2633.2"; gene_id "MSTRG.2633"; exon_number "1";	1	ensembl	CDS	180144472	180144639	.	-	0	gene_id "ENSSSCG00000034516"; gene_version "3"; transcript_id "ENSSSCT00000075014"; transcript_version "2"; exon_number "2"; gene_name "CDKL1"; gene_source "ensembl"; gene_biotype "protein_coding"; transcript_name "CDKL1-202"; transcript_source "ensembl"; transcript_biotype "protein_coding"; protein_id "ENSSSCP00000071907"; protein_version "2";
1	StringTie	exon	180147405	180147982	.	+	.	transcript_id "MSTRG.2633.2"; gene_id "MSTRG.2633"; exon_number "1";	1	ensembl	start_codon	180144637	180144639	.	-	0	gene_id "ENSSSCG00000034516"; gene_version "3"; transcript_id "ENSSSCT00000075014"; transcript_version "2"; exon_number "2"; gene_name "CDKL1"; gene_source "ensembl"; gene_biotype "protein_coding"; transcript_name "CDKL1-202"; transcript_source "ensembl"; transcript_biotype "protein_coding";
1	StringTie	exon	180147405	180147982	.	+	.	transcript_id "MSTRG.2633.2"; gene_id "MSTRG.2633"; exon_number "1";	1	ensembl	five_prime_utr	180144993	180145054	.	-	.	gene_id "ENSSSCG00000034516"; gene_version "3"; transcript_id "ENSSSCT00000075014"; transcript_version "2"; gene_name "CDKL1"; gene_source "ensembl"; gene_biotype "protein_coding"; transcript_name "CDKL1-202"; transcript_source "ensembl"; transcript_biotype "protein_coding";
1	StringTie	exon	180147405	180147982	.	+	.	transcript_id "MSTRG.2633.2"; gene_id "MSTRG.2633"; exon_number "1";	1	ensembl	five_prime_utr	180144640	180144757	.	-	.	gene_id "ENSSSCG00000034516"; gene_version "3"; transcript_id "ENSSSCT00000075014"; transcript_version "2"; gene_name "CDKL1"; gene_source "ensembl"; gene_biotype "protein_coding"; transcript_name "CDKL1-202"; transcript_source "ensembl"; transcript_biotype "protein_coding";
1	StringTie	exon	180147405	180147982	.	+	.	transcript_id "MSTRG.2633.2"; gene_id "MSTRG.2633"; exon_number "1";	1	ensembl	exon	180144993	180145032	.	-	.	gene_id "ENSSSCG00000034516"; gene_version "3"; transcript_id "ENSSSCT00000061065"; transcript_version "2"; exon_number "1"; gene_name "CDKL1"; gene_source "ensembl"; gene_biotype "protein_coding"; transcript_name "CDKL1-203"; transcript_source "ensembl"; transcript_biotype "protein_coding"; exon_id "ENSSSCE00000433102"; exon_version "1";
1	StringTie	exon	180147405	180147982	.	+	.	transcript_id "MSTRG.2633.2"; gene_id "MSTRG.2633"; exon_number "1";	1	ensembl	exon	180144472	180144757	.	-	.	gene_id "ENSSSCG00000034516"; gene_version "3"; transcript_id "ENSSSCT00000061065"; transcript_version "2"; exon_number "2"; gene_name "CDKL1"; gene_source "ensembl"; gene_biotype "protein_coding"; transcript_name "CDKL1-203"; transcript_source "ensembl"; transcript_biotype "protein_coding"; exon_id "ENSSSCE00000308455"; exon_version "1";
1	StringTie	exon	180147405	180147982	.	+	.	transcript_id "MSTRG.2633.2"; gene_id "MSTRG.2633"; exon_number "1";	1	ensembl	CDS	180144472	180144639	.	-	0	gene_id "ENSSSCG00000034516"; gene_version "3"; transcript_id "ENSSSCT00000061065"; transcript_version "2"; exon_number "2"; gene_name "CDKL1"; gene_source "ensembl"; gene_biotype "protein_coding"; transcript_name "CDKL1-203"; transcript_source "ensembl"; transcript_biotype "protein_coding"; protein_id "ENSSSCP00000036467"; protein_version "1";
1	StringTie	exon	180147405	180147982	.	+	.	transcript_id "MSTRG.2633.2"; gene_id "MSTRG.2633"; exon_number "1";	1	ensembl	start_codon	180144637	180144639	.	-	0	gene_id "ENSSSCG00000034516"; gene_version "3"; transcript_id "ENSSSCT00000061065"; transcript_version "2"; exon_number "2"; gene_name "CDKL1"; gene_source "ensembl"; gene_biotype "protein_coding"; transcript_name "CDKL1-203"; transcript_source "ensembl"; transcript_biotype "protein_coding";
1	StringTie	exon	180147405	180147982	.	+	.	transcript_id "MSTRG.2633.2"; gene_id "MSTRG.2633"; exon_number "1";	1	ensembl	five_prime_utr	180144993	180145032	.	-	.	gene_id "ENSSSCG00000034516"; gene_version "3"; transcript_id "ENSSSCT00000061065"; transcript_version "2"; gene_name "CDKL1"; gene_source "ensembl"; gene_biotype "protein_coding"; transcript_name "CDKL1-203"; transcript_source "ensembl"; transcript_biotype "protein_coding";
1	StringTie	exon	180147405	180147982	.	+	.	transcript_id "MSTRG.2633.2"; gene_id "MSTRG.2633"; exon_number "1";	1	ensembl	five_prime_utr	180144640	180144757	.	-	.	gene_id "ENSSSCG00000034516"; gene_version "3"; transcript_id "ENSSSCT00000061065"; transcript_version "2"; gene_name "CDKL1"; gene_source "ensembl"; gene_biotype "protein_coding"; transcript_name "CDKL1-203"; transcript_source "ensembl"; transcript_biotype "protein_coding";
1	StringTie	exon	180147405	180147982	.	+	.	transcript_id "MSTRG.2633.2"; gene_id "MSTRG.2633"; exon_number "1";	1	ensembl	exon	180173520	180173612	.	-	.	gene_id "ENSSSCG00000036634"; gene_version "3"; transcript_id "ENSSSCT00000087108"; transcript_version "2"; exon_number "30"; gene_name "MAP4K5"; gene_source "ensembl"; gene_biotype "protein_coding"; transcript_name "MAP4K5-201"; transcript_source "ensembl"; transcript_biotype "protein_coding"; exon_id "ENSSSCE00000367886"; exon_version "1";
1	StringTie	exon	180147405	180147982	.	+	.	transcript_id "MSTRG.2633.2"; gene_id "MSTRG.2633"; exon_number "1";	1	ensembl	CDS	180173520	180173612	.	-	2	gene_id "ENSSSCG00000036634"; gene_version "3"; transcript_id "ENSSSCT00000087108"; transcript_version "2"; exon_number "30"; gene_name "MAP4K5"; gene_source "ensembl"; gene_biotype "protein_coding"; transcript_name "MAP4K5-201"; transcript_source "ensembl"; transcript_biotype "protein_coding"; protein_id "ENSSSCP00000060345"; protein_version "2";
1	StringTie	exon	180147405	180147982	.	+	.	transcript_id "MSTRG.2633.2"; gene_id "MSTRG.2633"; exon_number "1";	1	ensembl	exon	180170189	180170259	.	-	.	gene_id "ENSSSCG00000036634"; gene_version "3"; transcript_id "ENSSSCT00000087108"; transcript_version "2"; exon_number "31"; gene_name "MAP4K5"; gene_source "ensembl"; gene_biotype "protein_coding"; transcript_name "MAP4K5-201"; transcript_source "ensembl"; transcript_biotype "protein_coding"; exon_id "ENSSSCE00000208369"; exon_version "2";
1	StringTie	exon	180147405	180147982	.	+	.	transcript_id "MSTRG.2633.2"; gene_id "MSTRG.2633"; exon_number "1";	1	ensembl	CDS	180170189	180170259	.	-	2	gene_id "ENSSSCG00000036634"; gene_version "3"; transcript_id "ENSSSCT00000087108"; transcript_version "2"; exon_number "31"; gene_name "MAP4K5"; gene_source "ensembl"; gene_biotype "protein_coding"; transcript_name "MAP4K5-201"; transcript_source "ensembl"; transcript_biotype "protein_coding"; protein_id "ENSSSCP00000060345"; protein_version "2";
1	StringTie	exon	180147405	180147982	.	+	.	transcript_id "MSTRG.2633.2"; gene_id "MSTRG.2633"; exon_number "1";	1	ensembl	exon	180167691	180167746	.	-	.	gene_id "ENSSSCG00000036634"; gene_version "3"; transcript_id "ENSSSCT00000087108"; transcript_version "2"; exon_number "32"; gene_name "MAP4K5"; gene_source "ensembl"; gene_biotype "protein_coding"; transcript_name "MAP4K5-201"; transcript_source "ensembl"; transcript_biotype "protein_coding"; exon_id "ENSSSCE00000334155"; exon_version "1";
1	StringTie	exon	180147405	180147982	.	+	.	transcript_id "MSTRG.2633.2"; gene_id "MSTRG.2633"; exon_number "1";	1	ensembl	CDS	180167691	180167746	.	-	0	gene_id "ENSSSCG00000036634"; gene_version "3"; transcript_id "ENSSSCT00000087108"; transcript_version "2"; exon_number "32"; gene_name "MAP4K5"; gene_source "ensembl"; gene_biotype "protein_coding"; transcript_name "MAP4K5-201"; transcript_source "ensembl"; transcript_biotype "protein_coding"; protein_id "ENSSSCP00000060345"; protein_version "2";
1	StringTie	exon	180147405	180147982	.	+	.	transcript_id "MSTRG.2633.2"; gene_id "MSTRG.2633"; exon_number "1";	1	ensembl	exon	180164458	180166059	.	-	.	gene_id "ENSSSCG00000036634"; gene_version "3"; transcript_id "ENSSSCT00000087108"; transcript_version "2"; exon_number "33"; gene_name "MAP4K5"; gene_source "ensembl"; gene_biotype "protein_coding"; transcript_name "MAP4K5-201"; transcript_source "ensembl"; transcript_biotype "protein_coding"; exon_id "ENSSSCE00000301069"; exon_version "2";
1	StringTie	exon	180147405	180147982	.	+	.	transcript_id "MSTRG.2633.2"; gene_id "MSTRG.2633"; exon_number "1";	1	ensembl	CDS	180165975	180166059	.	-	1	gene_id "ENSSSCG00000036634"; gene_version "3"; transcript_id "ENSSSCT00000087108"; transcript_version "2"; exon_number "33"; gene_name "MAP4K5"; gene_source "ensembl"; gene_biotype "protein_coding"; transcript_name "MAP4K5-201"; transcript_source "ensembl"; transcript_biotype "protein_coding"; protein_id "ENSSSCP00000060345"; protein_version "2";
1	StringTie	exon	180147405	180147982	.	+	.	transcript_id "MSTRG.2633.2"; gene_id "MSTRG.2633"; exon_number "1";	1	ensembl	stop_codon	180165972	180165974	.	-	0	gene_id "ENSSSCG00000036634"; gene_version "3"; transcript_id "ENSSSCT00000087108"; transcript_version "2"; exon_number "33"; gene_name "MAP4K5"; gene_source "ensembl"; gene_biotype "protein_coding"; transcript_name "MAP4K5-201"; transcript_source "ensembl"; transcript_biotype "protein_coding";
1	StringTie	exon	180147405	180147982	.	+	.	transcript_id "MSTRG.2633.2"; gene_id "MSTRG.2633"; exon_number "1";	1	ensembl	three_prime_utr	180164458	180165971	.	-	.	gene_id "ENSSSCG00000036634"; gene_version "3"; transcript_id "ENSSSCT00000087108"; transcript_version "2"; gene_name "MAP4K5"; gene_source "ensembl"; gene_biotype "protein_coding"; transcript_name "MAP4K5-201"; transcript_source "ensembl"; transcript_biotype "protein_coding";
1	StringTie	exon	180147405	180147982	.	+	.	transcript_id "MSTRG.2633.2"; gene_id "MSTRG.2633"; exon_number "1";	1	ensembl	exon	180173520	180173612	.	-	.	gene_id "ENSSSCG00000036634"; gene_version "3"; transcript_id "ENSSSCT00000053912"; transcript_version "3"; exon_number "29"; gene_name "MAP4K5"; gene_source "ensembl"; gene_biotype "protein_coding"; transcript_name "MAP4K5-202"; transcript_source "ensembl"; transcript_biotype "protein_coding"; exon_id "ENSSSCE00000367886"; exon_version "1";
1	StringTie	exon	180147405	180147982	.	+	.	transcript_id "MSTRG.2633.2"; gene_id "MSTRG.2633"; exon_number "1";	1	ensembl	CDS	180173520	180173612	.	-	2	gene_id "ENSSSCG00000036634"; gene_version "3"; transcript_id "ENSSSCT00000053912"; transcript_version "3"; exon_number "29"; gene_name "MAP4K5"; gene_source "ensembl"; gene_biotype "protein_coding"; transcript_name "MAP4K5-202"; transcript_source "ensembl"; transcript_biotype "protein_coding"; protein_id "ENSSSCP00000057390"; protein_version "3";
1	StringTie	exon	180147405	180147982	.	+	.	transcript_id "MSTRG.2633.2"; gene_id "MSTRG.2633"; exon_number "1";	1	ensembl	exon	180170189	180170259	.	-	.	gene_id "ENSSSCG00000036634"; gene_version "3"; transcript_id "ENSSSCT00000053912"; transcript_version "3"; exon_number "30"; gene_name "MAP4K5"; gene_source "ensembl"; gene_biotype "protein_coding"; transcript_name "MAP4K5-202"; transcript_source "ensembl"; transcript_biotype "protein_coding"; exon_id "ENSSSCE00000208369"; exon_version "2";
1	StringTie	exon	180147405	180147982	.	+	.	transcript_id "MSTRG.2633.2"; gene_id "MSTRG.2633"; exon_number "1";	1	ensembl	CDS	180170189	180170259	.	-	2	gene_id "ENSSSCG00000036634"; gene_version "3"; transcript_id "ENSSSCT00000053912"; transcript_version "3"; exon_number "30"; gene_name "MAP4K5"; gene_source "ensembl"; gene_biotype "protein_coding"; transcript_name "MAP4K5-202"; transcript_source "ensembl"; transcript_biotype "protein_coding"; protein_id "ENSSSCP00000057390"; protein_version "3";
1	StringTie	exon	180147405	180147982	.	+	.	transcript_id "MSTRG.2633.2"; gene_id "MSTRG.2633"; exon_number "1";	1	ensembl	exon	180167691	180167746	.	-	.	gene_id "ENSSSCG00000036634"; gene_version "3"; transcript_id "ENSSSCT00000053912"; transcript_version "3"; exon_number "31"; gene_name "MAP4K5"; gene_source "ensembl"; gene_biotype "protein_coding"; transcript_name "MAP4K5-202"; transcript_source "ensembl"; transcript_biotype "protein_coding"; exon_id "ENSSSCE00000334155"; exon_version "1";
1	StringTie	exon	180147405	180147982	.	+	.	transcript_id "MSTRG.2633.2"; gene_id "MSTRG.2633"; exon_number "1";	1	ensembl	CDS	180167691	180167746	.	-	0	gene_id "ENSSSCG00000036634"; gene_version "3"; transcript_id "ENSSSCT00000053912"; transcript_version "3"; exon_number "31"; gene_name "MAP4K5"; gene_source "ensembl"; gene_biotype "protein_coding"; transcript_name "MAP4K5-202"; transcript_source "ensembl"; transcript_biotype "protein_coding"; protein_id "ENSSSCP00000057390"; protein_version "3";
1	StringTie	exon	180147405	180147982	.	+	.	transcript_id "MSTRG.2633.2"; gene_id "MSTRG.2633"; exon_number "1";	1	ensembl	exon	180164458	180166059	.	-	.	gene_id "ENSSSCG00000036634"; gene_version "3"; transcript_id "ENSSSCT00000053912"; transcript_version "3"; exon_number "32"; gene_name "MAP4K5"; gene_source "ensembl"; gene_biotype "protein_coding"; transcript_name "MAP4K5-202"; transcript_source "ensembl"; transcript_biotype "protein_coding"; exon_id "ENSSSCE00000301069"; exon_version "2";
1	StringTie	exon	180147405	180147982	.	+	.	transcript_id "MSTRG.2633.2"; gene_id "MSTRG.2633"; exon_number "1";	1	ensembl	CDS	180165975	180166059	.	-	1	gene_id "ENSSSCG00000036634"; gene_version "3"; transcript_id "ENSSSCT00000053912"; transcript_version "3"; exon_number "32"; gene_name "MAP4K5"; gene_source "ensembl"; gene_biotype "protein_coding"; transcript_name "MAP4K5-202"; transcript_source "ensembl"; transcript_biotype "protein_coding"; protein_id "ENSSSCP00000057390"; protein_version "3";
1	StringTie	exon	180147405	180147982	.	+	.	transcript_id "MSTRG.2633.2"; gene_id "MSTRG.2633"; exon_number "1";	1	ensembl	stop_codon	180165972	180165974	.	-	0	gene_id "ENSSSCG00000036634"; gene_version "3"; transcript_id "ENSSSCT00000053912"; transcript_version "3"; exon_number "32"; gene_name "MAP4K5"; gene_source "ensembl"; gene_biotype "protein_coding"; transcript_name "MAP4K5-202"; transcript_source "ensembl"; transcript_biotype "protein_coding";
1	StringTie	exon	180147405	180147982	.	+	.	transcript_id "MSTRG.2633.2"; gene_id "MSTRG.2633"; exon_number "1";	1	ensembl	three_prime_utr	180164458	180165971	.	-	.	gene_id "ENSSSCG00000036634"; gene_version "3"; transcript_id "ENSSSCT00000053912"; transcript_version "3"; gene_name "MAP4K5"; gene_source "ensembl"; gene_biotype "protein_coding"; transcript_name "MAP4K5-202"; transcript_source "ensembl"; transcript_biotype "protein_coding";
1	StringTie	exon	180147405	180147982	.	+	.	transcript_id "MSTRG.2633.2"; gene_id "MSTRG.2633"; exon_number "1";	1	ensembl	exon	180187953	180187955	.	-	.	gene_id "ENSSSCG00000036634"; gene_version "3"; transcript_id "ENSSSCT00000087108"; transcript_version "2"; exon_number "24"; gene_name "MAP4K5"; gene_source "ensembl"; gene_biotype "protein_coding"; transcript_name "MAP4K5-201"; transcript_source "ensembl"; transcript_biotype "protein_coding"; exon_id "ENSSSCE00000517557"; exon_version "1";
1	StringTie	exon	180147405	180147982	.	+	.	transcript_id "MSTRG.2633.2"; gene_id "MSTRG.2633"; exon_number "1";	1	ensembl	CDS	180187953	180187955	.	-	2	gene_id "ENSSSCG00000036634"; gene_version "3"; transcript_id "ENSSSCT00000087108"; transcript_version "2"; exon_number "24"; gene_name "MAP4K5"; gene_source "ensembl"; gene_biotype "protein_coding"; transcript_name "MAP4K5-201"; transcript_source "ensembl"; transcript_biotype "protein_coding"; protein_id "ENSSSCP00000060345"; protein_version "2";
1	StringTie	exon	180147405	180147982	.	+	.	transcript_id "MSTRG.2633.2"; gene_id "MSTRG.2633"; exon_number "1";	1	ensembl	exon	180187757	180187871	.	-	.	gene_id "ENSSSCG00000036634"; gene_version "3"; transcript_id "ENSSSCT00000087108"; transcript_version "2"; exon_number "25"; gene_name "MAP4K5"; gene_source "ensembl"; gene_biotype "protein_coding"; transcript_name "MAP4K5-201"; transcript_source "ensembl"; transcript_biotype "protein_coding"; exon_id "ENSSSCE00000288414"; exon_version "2";
1	StringTie	exon	180147405	180147982	.	+	.	transcript_id "MSTRG.2633.2"; gene_id "MSTRG.2633"; exon_number "1";	1	ensembl	CDS	180187757	180187871	.	-	2	gene_id "ENSSSCG00000036634"; gene_version "3"; transcript_id "ENSSSCT00000087108"; transcript_version "2"; exon_number "25"; gene_name "MAP4K5"; gene_source "ensembl"; gene_biotype "protein_coding"; transcript_name "MAP4K5-201"; transcript_source "ensembl"; transcript_biotype "protein_coding"; protein_id "ENSSSCP00000060345"; protein_version "2";
1	StringTie	exon	180147405	180147982	.	+	.	transcript_id "MSTRG.2633.2"; gene_id "MSTRG.2633"; exon_number "1";	1	ensembl	exon	180187074	180187132	.	-	.	gene_id "ENSSSCG00000036634"; gene_version "3"; transcript_id "ENSSSCT00000087108"; transcript_version "2"; exon_number "26"; gene_name "MAP4K5"; gene_source "ensembl"; gene_biotype "protein_coding"; transcript_name "MAP4K5-201"; transcript_source "ensembl"; transcript_biotype "protein_coding"; exon_id "ENSSSCE00000305656"; exon_version "1";
1	StringTie	exon	180147405	180147982	.	+	.	transcript_id "MSTRG.2633.2"; gene_id "MSTRG.2633"; exon_number "1";	1	ensembl	CDS	180187074	180187132	.	-	1	gene_id "ENSSSCG00000036634"; gene_version "3"; transcript_id "ENSSSCT00000087108"; transcript_version "2"; exon_number "26"; gene_name "MAP4K5"; gene_source "ensembl"; gene_biotype "protein_coding"; transcript_name "MAP4K5-201"; transcript_source "ensembl"; transcript_biotype "protein_coding"; protein_id "ENSSSCP00000060345"; protein_version "2";
1	StringTie	exon	180147405	180147982	.	+	.	transcript_id "MSTRG.2633.2"; gene_id "MSTRG.2633"; exon_number "1";	1	ensembl	exon	180182967	180183070	.	-	.	gene_id "ENSSSCG00000036634"; gene_version "3"; transcript_id "ENSSSCT00000087108"; transcript_version "2"; exon_number "27"; gene_name "MAP4K5"; gene_source "ensembl"; gene_biotype "protein_coding"; transcript_name "MAP4K5-201"; transcript_source "ensembl"; transcript_biotype "protein_coding"; exon_id "ENSSSCE00000208153"; exon_version "2";
1	StringTie	exon	180147405	180147982	.	+	.	transcript_id "MSTRG.2633.2"; gene_id "MSTRG.2633"; exon_number "1";	1	ensembl	CDS	180182967	180183070	.	-	2	gene_id "ENSSSCG00000036634"; gene_version "3"; transcript_id "ENSSSCT00000087108"; transcript_version "2"; exon_number "27"; gene_name "MAP4K5"; gene_source "ensembl"; gene_biotype "protein_coding"; transcript_name "MAP4K5-201"; transcript_source "ensembl"; transcript_biotype "protein_coding"; protein_id "ENSSSCP00000060345"; protein_version "2";
1	StringTie	exon	180147405	180147982	.	+	.	transcript_id "MSTRG.2633.2"; gene_id "MSTRG.2633"; exon_number "1";	1	ensembl	exon	180180010	180180187	.	-	.	gene_id "ENSSSCG00000036634"; gene_version "3"; transcript_id "ENSSSCT00000087108"; transcript_version "2"; exon_number "28"; gene_name "MAP4K5"; gene_source "ensembl"; gene_biotype "protein_coding"; transcript_name "MAP4K5-201"; transcript_source "ensembl"; transcript_biotype "protein_coding"; exon_id "ENSSSCE00000366227"; exon_version "1";
1	StringTie	exon	180147405	180147982	.	+	.	transcript_id "MSTRG.2633.2"; gene_id "MSTRG.2633"; exon_number "1";	1	ensembl	CDS	180180010	180180187	.	-	0	gene_id "ENSSSCG00000036634"; gene_version "3"; transcript_id "ENSSSCT00000087108"; transcript_version "2"; exon_number "28"; gene_name "MAP4K5"; gene_source "ensembl"; gene_biotype "protein_coding"; transcript_name "MAP4K5-201"; transcript_source "ensembl"; transcript_biotype "protein_coding"; protein_id "ENSSSCP00000060345"; protein_version "2";
1	StringTie	exon	180147405	180147982	.	+	.	transcript_id "MSTRG.2633.2"; gene_id "MSTRG.2633"; exon_number "1";	1	ensembl	exon	180177094	180177162	.	-	.	gene_id "ENSSSCG00000036634"; gene_version "3"; transcript_id "ENSSSCT00000087108"; transcript_version "2"; exon_number "29"; gene_name "MAP4K5"; gene_source "ensembl"; gene_biotype "protein_coding"; transcript_name "MAP4K5-201"; transcript_source "ensembl"; transcript_biotype "protein_coding"; exon_id "ENSSSCE00000319741"; exon_version "1";
1	StringTie	exon	180147405	180147982	.	+	.	transcript_id "MSTRG.2633.2"; gene_id "MSTRG.2633"; exon_number "1";	1	ensembl	CDS	180177094	180177162	.	-	2	gene_id "ENSSSCG00000036634"; gene_version "3"; transcript_id "ENSSSCT00000087108"; transcript_version "2"; exon_number "29"; gene_name "MAP4K5"; gene_source "ensembl"; gene_biotype "protein_coding"; transcript_name "MAP4K5-201"; transcript_source "ensembl"; transcript_biotype "protein_coding"; protein_id "ENSSSCP00000060345"; protein_version "2";
1	StringTie	exon	180147405	180147982	.	+	.	transcript_id "MSTRG.2633.2"; gene_id "MSTRG.2633"; exon_number "1";	1	ensembl	exon	180187757	180187871	.	-	.	gene_id "ENSSSCG00000036634"; gene_version "3"; transcript_id "ENSSSCT00000053912"; transcript_version "3"; exon_number "24"; gene_name "MAP4K5"; gene_source "ensembl"; gene_biotype "protein_coding"; transcript_name "MAP4K5-202"; transcript_source "ensembl"; transcript_biotype "protein_coding"; exon_id "ENSSSCE00000288414"; exon_version "2";
1	StringTie	exon	180147405	180147982	.	+	.	transcript_id "MSTRG.2633.2"; gene_id "MSTRG.2633"; exon_number "1";	1	ensembl	CDS	180187757	180187871	.	-	2	gene_id "ENSSSCG00000036634"; gene_version "3"; transcript_id "ENSSSCT00000053912"; transcript_version "3"; exon_number "24"; gene_name "MAP4K5"; gene_source "ensembl"; gene_biotype "protein_coding"; transcript_name "MAP4K5-202"; transcript_source "ensembl"; transcript_biotype "protein_coding"; protein_id "ENSSSCP00000057390"; protein_version "3";
1	StringTie	exon	180147405	180147982	.	+	.	transcript_id "MSTRG.2633.2"; gene_id "MSTRG.2633"; exon_number "1";	1	ensembl	exon	180187074	180187132	.	-	.	gene_id "ENSSSCG00000036634"; gene_version "3"; transcript_id "ENSSSCT00000053912"; transcript_version "3"; exon_number "25"; gene_name "MAP4K5"; gene_source "ensembl"; gene_biotype "protein_coding"; transcript_name "MAP4K5-202"; transcript_source "ensembl"; transcript_biotype "protein_coding"; exon_id "ENSSSCE00000305656"; exon_version "1";
1	StringTie	exon	180147405	180147982	.	+	.	transcript_id "MSTRG.2633.2"; gene_id "MSTRG.2633"; exon_number "1";	1	ensembl	CDS	180187074	180187132	.	-	1	gene_id "ENSSSCG00000036634"; gene_version "3"; transcript_id "ENSSSCT00000053912"; transcript_version "3"; exon_number "25"; gene_name "MAP4K5"; gene_source "ensembl"; gene_biotype "protein_coding"; transcript_name "MAP4K5-202"; transcript_source "ensembl"; transcript_biotype "protein_coding"; protein_id "ENSSSCP00000057390"; protein_version "3";
1	StringTie	exon	180147405	180147982	.	+	.	transcript_id "MSTRG.2633.2"; gene_id "MSTRG.2633"; exon_number "1";	1	ensembl	exon	180182967	180183070	.	-	.	gene_id "ENSSSCG00000036634"; gene_version "3"; transcript_id "ENSSSCT00000053912"; transcript_version "3"; exon_number "26"; gene_name "MAP4K5"; gene_source "ensembl"; gene_biotype "protein_coding"; transcript_name "MAP4K5-202"; transcript_source "ensembl"; transcript_biotype "protein_coding"; exon_id "ENSSSCE00000208153"; exon_version "2";
1	StringTie	exon	180147405	180147982	.	+	.	transcript_id "MSTRG.2633.2"; gene_id "MSTRG.2633"; exon_number "1";	1	ensembl	CDS	180182967	180183070	.	-	2	gene_id "ENSSSCG00000036634"; gene_version "3"; transcript_id "ENSSSCT00000053912"; transcript_version "3"; exon_number "26"; gene_name "MAP4K5"; gene_source "ensembl"; gene_biotype "protein_coding"; transcript_name "MAP4K5-202"; transcript_source "ensembl"; transcript_biotype "protein_coding"; protein_id "ENSSSCP00000057390"; protein_version "3";
1	StringTie	exon	180147405	180147982	.	+	.	transcript_id "MSTRG.2633.2"; gene_id "MSTRG.2633"; exon_number "1";	1	ensembl	exon	180180010	180180187	.	-	.	gene_id "ENSSSCG00000036634"; gene_version "3"; transcript_id "ENSSSCT00000053912"; transcript_version "3"; exon_number "27"; gene_name "MAP4K5"; gene_source "ensembl"; gene_biotype "protein_coding"; transcript_name "MAP4K5-202"; transcript_source "ensembl"; transcript_biotype "protein_coding"; exon_id "ENSSSCE00000366227"; exon_version "1";
1	StringTie	exon	180147405	180147982	.	+	.	transcript_id "MSTRG.2633.2"; gene_id "MSTRG.2633"; exon_number "1";	1	ensembl	CDS	180180010	180180187	.	-	0	gene_id "ENSSSCG00000036634"; gene_version "3"; transcript_id "ENSSSCT00000053912"; transcript_version "3"; exon_number "27"; gene_name "MAP4K5"; gene_source "ensembl"; gene_biotype "protein_coding"; transcript_name "MAP4K5-202"; transcript_source "ensembl"; transcript_biotype "protein_coding"; protein_id "ENSSSCP00000057390"; protein_version "3";
1	StringTie	exon	180147405	180147982	.	+	.	transcript_id "MSTRG.2633.2"; gene_id "MSTRG.2633"; exon_number "1";	1	ensembl	exon	180177094	180177162	.	-	.	gene_id "ENSSSCG00000036634"; gene_version "3"; transcript_id "ENSSSCT00000053912"; transcript_version "3"; exon_number "28"; gene_name "MAP4K5"; gene_source "ensembl"; gene_biotype "protein_coding"; transcript_name "MAP4K5-202"; transcript_source "ensembl"; transcript_biotype "protein_coding"; exon_id "ENSSSCE00000319741"; exon_version "1";
1	StringTie	exon	180147405	180147982	.	+	.	transcript_id "MSTRG.2633.2"; gene_id "MSTRG.2633"; exon_number "1";	1	ensembl	CDS	180177094	180177162	.	-	2	gene_id "ENSSSCG00000036634"; gene_version "3"; transcript_id "ENSSSCT00000053912"; transcript_version "3"; exon_number "28"; gene_name "MAP4K5"; gene_source "ensembl"; gene_biotype "protein_coding"; transcript_name "MAP4K5-202"; transcript_source "ensembl"; transcript_biotype "protein_coding"; protein_id "ENSSSCP00000057390"; protein_version "3";
1	StringTie	exon	180147405	180147982	.	+	.	transcript_id "MSTRG.2633.2"; gene_id "MSTRG.2633"; exon_number "1";	1	ensembl	exon	180201578	180201636	.	-	.	gene_id "ENSSSCG00000036634"; gene_version "3"; transcript_id "ENSSSCT00000087108"; transcript_version "2"; exon_number "15"; gene_name "MAP4K5"; gene_source "ensembl"; gene_biotype "protein_coding"; transcript_name "MAP4K5-201"; transcript_source "ensembl"; transcript_biotype "protein_coding"; exon_id "ENSSSCE00000330908"; exon_version "1";
1	StringTie	exon	180147405	180147982	.	+	.	transcript_id "MSTRG.2633.2"; gene_id "MSTRG.2633"; exon_number "1";	1	ensembl	CDS	180201578	180201636	.	-	2	gene_id "ENSSSCG00000036634"; gene_version "3"; transcript_id "ENSSSCT00000087108"; transcript_version "2"; exon_number "15"; gene_name "MAP4K5"; gene_source "ensembl"; gene_biotype "protein_coding"; transcript_name "MAP4K5-201"; transcript_source "ensembl"; transcript_biotype "protein_coding"; protein_id "ENSSSCP00000060345"; protein_version "2";
1	StringTie	exon	180147405	180147982	.	+	.	transcript_id "MSTRG.2633.2"; gene_id "MSTRG.2633"; exon_number "1";	1	ensembl	exon	180200260	180200327	.	-	.	gene_id "ENSSSCG00000036634"; gene_version "3"; transcript_id "ENSSSCT00000087108"; transcript_version "2"; exon_number "16"; gene_name "MAP4K5"; gene_source "ensembl"; gene_biotype "protein_coding"; transcript_name "MAP4K5-201"; transcript_source "ensembl"; transcript_biotype "protein_coding"; exon_id "ENSSSCE00000327220"; exon_version "1";
1	StringTie	exon	180147405	180147982	.	+	.	transcript_id "MSTRG.2633.2"; gene_id "MSTRG.2633"; exon_number "1";	1	ensembl	CDS	180200260	180200327	.	-	0	gene_id "ENSSSCG00000036634"; gene_version "3"; transcript_id "ENSSSCT00000087108"; transcript_version "2"; exon_number "16"; gene_name "MAP4K5"; gene_source "ensembl"; gene_biotype "protein_coding"; transcript_name "MAP4K5-201"; transcript_source "ensembl"; transcript_biotype "protein_coding"; protein_id "ENSSSCP00000060345"; protein_version "2";
1	StringTie	exon	180147405	180147982	.	+	.	transcript_id "MSTRG.2633.2"; gene_id "MSTRG.2633"; exon_number "1";	1	ensembl	exon	180198281	180198323	.	-	.	gene_id "ENSSSCG00000036634"; gene_version "3"; transcript_id "ENSSSCT00000087108"; transcript_version "2"; exon_number "17"; gene_name "MAP4K5"; gene_source "ensembl"; gene_biotype "protein_coding"; transcript_name "MAP4K5-201"; transcript_source "ensembl"; transcript_biotype "protein_coding"; exon_id "ENSSSCE00000307716"; exon_version "1";
1	StringTie	exon	180147405	180147982	.	+	.	transcript_id "MSTRG.2633.2"; gene_id "MSTRG.2633"; exon_number "1";	1	ensembl	CDS	180198281	180198323	.	-	1	gene_id "ENSSSCG00000036634"; gene_version "3"; transcript_id "ENSSSCT00000087108"; transcript_version "2"; exon_number "17"; gene_name "MAP4K5"; gene_source "ensembl"; gene_biotype "protein_coding"; transcript_name "MAP4K5-201"; transcript_source "ensembl"; transcript_biotype "protein_coding"; protein_id "ENSSSCP00000060345"; protein_version "2";
1	StringTie	exon	180147405	180147982	.	+	.	transcript_id "MSTRG.2633.2"; gene_id "MSTRG.2633"; exon_number "1";	1	ensembl	exon	180197053	180197206	.	-	.	gene_id "ENSSSCG00000036634"; gene_version "3"; transcript_id "ENSSSCT00000087108"; transcript_version "2"; exon_number "18"; gene_name "MAP4K5"; gene_source "ensembl"; gene_biotype "protein_coding"; transcript_name "MAP4K5-201"; transcript_source "ensembl"; transcript_biotype "protein_coding"; exon_id "ENSSSCE00000302264"; exon_version "1";
1	StringTie	exon	180147405	180147982	.	+	.	transcript_id "MSTRG.2633.2"; gene_id "MSTRG.2633"; exon_number "1";	1	ensembl	CDS	180197053	180197206	.	-	0	gene_id "ENSSSCG00000036634"; gene_version "3"; transcript_id "ENSSSCT00000087108"; transcript_version "2"; exon_number "18"; gene_name "MAP4K5"; gene_source "ensembl"; gene_biotype "protein_coding"; transcript_name "MAP4K5-201"; transcript_source "ensembl"; transcript_biotype "protein_coding"; protein_id "ENSSSCP00000060345"; protein_version "2";
1	StringTie	exon	180147405	180147982	.	+	.	transcript_id "MSTRG.2633.2"; gene_id "MSTRG.2633"; exon_number "1";	1	ensembl	exon	180195673	180195770	.	-	.	gene_id "ENSSSCG00000036634"; gene_version "3"; transcript_id "ENSSSCT00000087108"; transcript_version "2"; exon_number "19"; gene_name "MAP4K5"; gene_source "ensembl"; gene_biotype "protein_coding"; transcript_name "MAP4K5-201"; transcript_source "ensembl"; transcript_biotype "protein_coding"; exon_id "ENSSSCE00000304470"; exon_version "1";
1	StringTie	exon	180147405	180147982	.	+	.	transcript_id "MSTRG.2633.2"; gene_id "MSTRG.2633"; exon_number "1";	1	ensembl	CDS	180195673	180195770	.	-	2	gene_id "ENSSSCG00000036634"; gene_version "3"; transcript_id "ENSSSCT00000087108"; transcript_version "2"; exon_number "19"; gene_name "MAP4K5"; gene_source "ensembl"; gene_biotype "protein_coding"; transcript_name "MAP4K5-201"; transcript_source "ensembl"; transcript_biotype "protein_coding"; protein_id "ENSSSCP00000060345"; protein_version "2";
1	StringTie	exon	180147405	180147982	.	+	.	transcript_id "MSTRG.2633.2"; gene_id "MSTRG.2633"; exon_number "1";	1	ensembl	exon	180195461	180195502	.	-	.	gene_id "ENSSSCG00000036634"; gene_version "3"; transcript_id "ENSSSCT00000087108"; transcript_version "2"; exon_number "20"; gene_name "MAP4K5"; gene_source "ensembl"; gene_biotype "protein_coding"; transcript_name "MAP4K5-201"; transcript_source "ensembl"; transcript_biotype "protein_coding"; exon_id "ENSSSCE00000357137"; exon_version "1";
1	StringTie	exon	180147405	180147982	.	+	.	transcript_id "MSTRG.2633.2"; gene_id "MSTRG.2633"; exon_number "1";	1	ensembl	CDS	180195461	180195502	.	-	0	gene_id "ENSSSCG00000036634"; gene_version "3"; transcript_id "ENSSSCT00000087108"; transcript_version "2"; exon_number "20"; gene_name "MAP4K5"; gene_source "ensembl"; gene_biotype "protein_coding"; transcript_name "MAP4K5-201"; transcript_source "ensembl"; transcript_biotype "protein_coding"; protein_id "ENSSSCP00000060345"; protein_version "2";
1	StringTie	exon	180147405	180147982	.	+	.	transcript_id "MSTRG.2633.2"; gene_id "MSTRG.2633"; exon_number "1";	1	ensembl	exon	180194125	180194209	.	-	.	gene_id "ENSSSCG00000036634"; gene_version "3"; transcript_id "ENSSSCT00000087108"; transcript_version "2"; exon_number "21"; gene_name "MAP4K5"; gene_source "ensembl"; gene_biotype "protein_coding"; transcript_name "MAP4K5-201"; transcript_source "ensembl"; transcript_biotype "protein_coding"; exon_id "ENSSSCE00000297736"; exon_version "1";
1	StringTie	exon	180147405	180147982	.	+	.	transcript_id "MSTRG.2633.2"; gene_id "MSTRG.2633"; exon_number "1";	1	ensembl	CDS	180194125	180194209	.	-	0	gene_id "ENSSSCG00000036634"; gene_version "3"; transcript_id "ENSSSCT00000087108"; transcript_version "2"; exon_number "21"; gene_name "MAP4K5"; gene_source "ensembl"; gene_biotype "protein_coding"; transcript_name "MAP4K5-201"; transcript_source "ensembl"; transcript_biotype "protein_coding"; protein_id "ENSSSCP00000060345"; protein_version "2";
1	StringTie	exon	180147405	180147982	.	+	.	transcript_id "MSTRG.2633.2"; gene_id "MSTRG.2633"; exon_number "1";	1	ensembl	exon	180191671	180191750	.	-	.	gene_id "ENSSSCG00000036634"; gene_version "3"; transcript_id "ENSSSCT00000087108"; transcript_version "2"; exon_number "22"; gene_name "MAP4K5"; gene_source "ensembl"; gene_biotype "protein_coding"; transcript_name "MAP4K5-201"; transcript_source "ensembl"; transcript_biotype "protein_coding"; exon_id "ENSSSCE00000310709"; exon_version "1";
1	StringTie	exon	180147405	180147982	.	+	.	transcript_id "MSTRG.2633.2"; gene_id "MSTRG.2633"; exon_number "1";	1	ensembl	CDS	180191671	180191750	.	-	2	gene_id "ENSSSCG00000036634"; gene_version "3"; transcript_id "ENSSSCT00000087108"; transcript_version "2"; exon_number "22"; gene_name "MAP4K5"; gene_source "ensembl"; gene_biotype "protein_coding"; transcript_name "MAP4K5-201"; transcript_source "ensembl"; transcript_biotype "protein_coding"; protein_id "ENSSSCP00000060345"; protein_version "2";
1	StringTie	exon	180147405	180147982	.	+	.	transcript_id "MSTRG.2633.2"; gene_id "MSTRG.2633"; exon_number "1";	1	ensembl	exon	180191312	180191372	.	-	.	gene_id "ENSSSCG00000036634"; gene_version "3"; transcript_id "ENSSSCT00000087108"; transcript_version "2"; exon_number "23"; gene_name "MAP4K5"; gene_source "ensembl"; gene_biotype "protein_coding"; transcript_name "MAP4K5-201"; transcript_source "ensembl"; transcript_biotype "protein_coding"; exon_id "ENSSSCE00000363197"; exon_version "1";
1	StringTie	exon	180147405	180147982	.	+	.	transcript_id "MSTRG.2633.2"; gene_id "MSTRG.2633"; exon_number "1";	1	ensembl	CDS	180191312	180191372	.	-	0	gene_id "ENSSSCG00000036634"; gene_version "3"; transcript_id "ENSSSCT00000087108"; transcript_version "2"; exon_number "23"; gene_name "MAP4K5"; gene_source "ensembl"; gene_biotype "protein_coding"; transcript_name "MAP4K5-201"; transcript_source "ensembl"; transcript_biotype "protein_coding"; protein_id "ENSSSCP00000060345"; protein_version "2";
1	StringTie	exon	180147405	180147982	.	+	.	transcript_id "MSTRG.2633.2"; gene_id "MSTRG.2633"; exon_number "1";	1	ensembl	exon	180201578	180201636	.	-	.	gene_id "ENSSSCG00000036634"; gene_version "3"; transcript_id "ENSSSCT00000053912"; transcript_version "3"; exon_number "15"; gene_name "MAP4K5"; gene_source "ensembl"; gene_biotype "protein_coding"; transcript_name "MAP4K5-202"; transcript_source "ensembl"; transcript_biotype "protein_coding"; exon_id "ENSSSCE00000330908"; exon_version "1";
1	StringTie	exon	180147405	180147982	.	+	.	transcript_id "MSTRG.2633.2"; gene_id "MSTRG.2633"; exon_number "1";	1	ensembl	CDS	180201578	180201636	.	-	2	gene_id "ENSSSCG00000036634"; gene_version "3"; transcript_id "ENSSSCT00000053912"; transcript_version "3"; exon_number "15"; gene_name "MAP4K5"; gene_source "ensembl"; gene_biotype "protein_coding"; transcript_name "MAP4K5-202"; transcript_source "ensembl"; transcript_biotype "protein_coding"; protein_id "ENSSSCP00000057390"; protein_version "3";
1	StringTie	exon	180147405	180147982	.	+	.	transcript_id "MSTRG.2633.2"; gene_id "MSTRG.2633"; exon_number "1";	1	ensembl	exon	180200260	180200327	.	-	.	gene_id "ENSSSCG00000036634"; gene_version "3"; transcript_id "ENSSSCT00000053912"; transcript_version "3"; exon_number "16"; gene_name "MAP4K5"; gene_source "ensembl"; gene_biotype "protein_coding"; transcript_name "MAP4K5-202"; transcript_source "ensembl"; transcript_biotype "protein_coding"; exon_id "ENSSSCE00000327220"; exon_version "1";
1	StringTie	exon	180147405	180147982	.	+	.	transcript_id "MSTRG.2633.2"; gene_id "MSTRG.2633"; exon_number "1";	1	ensembl	CDS	180200260	180200327	.	-	0	gene_id "ENSSSCG00000036634"; gene_version "3"; transcript_id "ENSSSCT00000053912"; transcript_version "3"; exon_number "16"; gene_name "MAP4K5"; gene_source "ensembl"; gene_biotype "protein_coding"; transcript_name "MAP4K5-202"; transcript_source "ensembl"; transcript_biotype "protein_coding"; protein_id "ENSSSCP00000057390"; protein_version "3";
1	StringTie	exon	180147405	180147982	.	+	.	transcript_id "MSTRG.2633.2"; gene_id "MSTRG.2633"; exon_number "1";	1	ensembl	exon	180198281	180198323	.	-	.	gene_id "ENSSSCG00000036634"; gene_version "3"; transcript_id "ENSSSCT00000053912"; transcript_version "3"; exon_number "17"; gene_name "MAP4K5"; gene_source "ensembl"; gene_biotype "protein_coding"; transcript_name "MAP4K5-202"; transcript_source "ensembl"; transcript_biotype "protein_coding"; exon_id "ENSSSCE00000307716"; exon_version "1";
1	StringTie	exon	180147405	180147982	.	+	.	transcript_id "MSTRG.2633.2"; gene_id "MSTRG.2633"; exon_number "1";	1	ensembl	CDS	180198281	180198323	.	-	1	gene_id "ENSSSCG00000036634"; gene_version "3"; transcript_id "ENSSSCT00000053912"; transcript_version "3"; exon_number "17"; gene_name "MAP4K5"; gene_source "ensembl"; gene_biotype "protein_coding"; transcript_name "MAP4K5-202"; transcript_source "ensembl"; transcript_biotype "protein_coding"; protein_id "ENSSSCP00000057390"; protein_version "3";
1	StringTie	exon	180147405	180147982	.	+	.	transcript_id "MSTRG.2633.2"; gene_id "MSTRG.2633"; exon_number "1";	1	ensembl	exon	180197053	180197206	.	-	.	gene_id "ENSSSCG00000036634"; gene_version "3"; transcript_id "ENSSSCT00000053912"; transcript_version "3"; exon_number "18"; gene_name "MAP4K5"; gene_source "ensembl"; gene_biotype "protein_coding"; transcript_name "MAP4K5-202"; transcript_source "ensembl"; transcript_biotype "protein_coding"; exon_id "ENSSSCE00000302264"; exon_version "1";
1	StringTie	exon	180147405	180147982	.	+	.	transcript_id "MSTRG.2633.2"; gene_id "MSTRG.2633"; exon_number "1";	1	ensembl	CDS	180197053	180197206	.	-	0	gene_id "ENSSSCG00000036634"; gene_version "3"; transcript_id "ENSSSCT00000053912"; transcript_version "3"; exon_number "18"; gene_name "MAP4K5"; gene_source "ensembl"; gene_biotype "protein_coding"; transcript_name "MAP4K5-202"; transcript_source "ensembl"; transcript_biotype "protein_coding"; protein_id "ENSSSCP00000057390"; protein_version "3";
1	StringTie	exon	180147405	180147982	.	+	.	transcript_id "MSTRG.2633.2"; gene_id "MSTRG.2633"; exon_number "1";	1	ensembl	exon	180195673	180195770	.	-	.	gene_id "ENSSSCG00000036634"; gene_version "3"; transcript_id "ENSSSCT00000053912"; transcript_version "3"; exon_number "19"; gene_name "MAP4K5"; gene_source "ensembl"; gene_biotype "protein_coding"; transcript_name "MAP4K5-202"; transcript_source "ensembl"; transcript_biotype "protein_coding"; exon_id "ENSSSCE00000304470"; exon_version "1";
1	StringTie	exon	180147405	180147982	.	+	.	transcript_id "MSTRG.2633.2"; gene_id "MSTRG.2633"; exon_number "1";	1	ensembl	CDS	180195673	180195770	.	-	2	gene_id "ENSSSCG00000036634"; gene_version "3"; transcript_id "ENSSSCT00000053912"; transcript_version "3"; exon_number "19"; gene_name "MAP4K5"; gene_source "ensembl"; gene_biotype "protein_coding"; transcript_name "MAP4K5-202"; transcript_source "ensembl"; transcript_biotype "protein_coding"; protein_id "ENSSSCP00000057390"; protein_version "3";
1	StringTie	exon	180147405	180147982	.	+	.	transcript_id "MSTRG.2633.2"; gene_id "MSTRG.2633"; exon_number "1";	1	ensembl	exon	180195461	180195502	.	-	.	gene_id "ENSSSCG00000036634"; gene_version "3"; transcript_id "ENSSSCT00000053912"; transcript_version "3"; exon_number "20"; gene_name "MAP4K5"; gene_source "ensembl"; gene_biotype "protein_coding"; transcript_name "MAP4K5-202"; transcript_source "ensembl"; transcript_biotype "protein_coding"; exon_id "ENSSSCE00000357137"; exon_version "1";
1	StringTie	exon	180147405	180147982	.	+	.	transcript_id "MSTRG.2633.2"; gene_id "MSTRG.2633"; exon_number "1";	1	ensembl	CDS	180195461	180195502	.	-	0	gene_id "ENSSSCG00000036634"; gene_version "3"; transcript_id "ENSSSCT00000053912"; transcript_version "3"; exon_number "20"; gene_name "MAP4K5"; gene_source "ensembl"; gene_biotype "protein_coding"; transcript_name "MAP4K5-202"; transcript_source "ensembl"; transcript_biotype "protein_coding"; protein_id "ENSSSCP00000057390"; protein_version "3";
1	StringTie	exon	180147405	180147982	.	+	.	transcript_id "MSTRG.2633.2"; gene_id "MSTRG.2633"; exon_number "1";	1	ensembl	exon	180194125	180194209	.	-	.	gene_id "ENSSSCG00000036634"; gene_version "3"; transcript_id "ENSSSCT00000053912"; transcript_version "3"; exon_number "21"; gene_name "MAP4K5"; gene_source "ensembl"; gene_biotype "protein_coding"; transcript_name "MAP4K5-202"; transcript_source "ensembl"; transcript_biotype "protein_coding"; exon_id "ENSSSCE00000297736"; exon_version "1";
1	StringTie	exon	180147405	180147982	.	+	.	transcript_id "MSTRG.2633.2"; gene_id "MSTRG.2633"; exon_number "1";	1	ensembl	CDS	180194125	180194209	.	-	0	gene_id "ENSSSCG00000036634"; gene_version "3"; transcript_id "ENSSSCT00000053912"; transcript_version "3"; exon_number "21"; gene_name "MAP4K5"; gene_source "ensembl"; gene_biotype "protein_coding"; transcript_name "MAP4K5-202"; transcript_source "ensembl"; transcript_biotype "protein_coding"; protein_id "ENSSSCP00000057390"; protein_version "3";
1	StringTie	exon	180147405	180147982	.	+	.	transcript_id "MSTRG.2633.2"; gene_id "MSTRG.2633"; exon_number "1";	1	ensembl	exon	180191671	180191750	.	-	.	gene_id "ENSSSCG00000036634"; gene_version "3"; transcript_id "ENSSSCT00000053912"; transcript_version "3"; exon_number "22"; gene_name "MAP4K5"; gene_source "ensembl"; gene_biotype "protein_coding"; transcript_name "MAP4K5-202"; transcript_source "ensembl"; transcript_biotype "protein_coding"; exon_id "ENSSSCE00000310709"; exon_version "1";
1	StringTie	exon	180147405	180147982	.	+	.	transcript_id "MSTRG.2633.2"; gene_id "MSTRG.2633"; exon_number "1";	1	ensembl	CDS	180191671	180191750	.	-	2	gene_id "ENSSSCG00000036634"; gene_version "3"; transcript_id "ENSSSCT00000053912"; transcript_version "3"; exon_number "22"; gene_name "MAP4K5"; gene_source "ensembl"; gene_biotype "protein_coding"; transcript_name "MAP4K5-202"; transcript_source "ensembl"; transcript_biotype "protein_coding"; protein_id "ENSSSCP00000057390"; protein_version "3";
1	StringTie	exon	180147405	180147982	.	+	.	transcript_id "MSTRG.2633.2"; gene_id "MSTRG.2633"; exon_number "1";	1	ensembl	exon	180191312	180191372	.	-	.	gene_id "ENSSSCG00000036634"; gene_version "3"; transcript_id "ENSSSCT00000053912"; transcript_version "3"; exon_number "23"; gene_name "MAP4K5"; gene_source "ensembl"; gene_biotype "protein_coding"; transcript_name "MAP4K5-202"; transcript_source "ensembl"; transcript_biotype "protein_coding"; exon_id "ENSSSCE00000363197"; exon_version "1";
1	StringTie	exon	180147405	180147982	.	+	.	transcript_id "MSTRG.2633.2"; gene_id "MSTRG.2633"; exon_number "1";	1	ensembl	CDS	180191312	180191372	.	-	0	gene_id "ENSSSCG00000036634"; gene_version "3"; transcript_id "ENSSSCT00000053912"; transcript_version "3"; exon_number "23"; gene_name "MAP4K5"; gene_source "ensembl"; gene_biotype "protein_coding"; transcript_name "MAP4K5-202"; transcript_source "ensembl"; transcript_biotype "protein_coding"; protein_id "ENSSSCP00000057390"; protein_version "3";
1	StringTie	exon	180147405	180147982	.	+	.	transcript_id "MSTRG.2633.2"; gene_id "MSTRG.2633"; exon_number "1";	1	ensembl	exon	180209669	180209747	.	-	.	gene_id "ENSSSCG00000036634"; gene_version "3"; transcript_id "ENSSSCT00000087108"; transcript_version "2"; exon_number "14"; gene_name "MAP4K5"; gene_source "ensembl"; gene_biotype "protein_coding"; transcript_name "MAP4K5-201"; transcript_source "ensembl"; transcript_biotype "protein_coding"; exon_id "ENSSSCE00000339006"; exon_version "1";
1	StringTie	exon	180147405	180147982	.	+	.	transcript_id "MSTRG.2633.2"; gene_id "MSTRG.2633"; exon_number "1";	1	ensembl	CDS	180209669	180209747	.	-	0	gene_id "ENSSSCG00000036634"; gene_version "3"; transcript_id "ENSSSCT00000087108"; transcript_version "2"; exon_number "14"; gene_name "MAP4K5"; gene_source "ensembl"; gene_biotype "protein_coding"; transcript_name "MAP4K5-201"; transcript_source "ensembl"; transcript_biotype "protein_coding"; protein_id "ENSSSCP00000060345"; protein_version "2";
1	StringTie	exon	180147405	180147982	.	+	.	transcript_id "MSTRG.2633.2"; gene_id "MSTRG.2633"; exon_number "1";	1	ensembl	exon	180209669	180209747	.	-	.	gene_id "ENSSSCG00000036634"; gene_version "3"; transcript_id "ENSSSCT00000053912"; transcript_version "3"; exon_number "14"; gene_name "MAP4K5"; gene_source "ensembl"; gene_biotype "protein_coding"; transcript_name "MAP4K5-202"; transcript_source "ensembl"; transcript_biotype "protein_coding"; exon_id "ENSSSCE00000339006"; exon_version "1";
1	StringTie	exon	180147405	180147982	.	+	.	transcript_id "MSTRG.2633.2"; gene_id "MSTRG.2633"; exon_number "1";	1	ensembl	CDS	180209669	180209747	.	-	0	gene_id "ENSSSCG00000036634"; gene_version "3"; transcript_id "ENSSSCT00000053912"; transcript_version "3"; exon_number "14"; gene_name "MAP4K5"; gene_source "ensembl"; gene_biotype "protein_coding"; transcript_name "MAP4K5-202"; transcript_source "ensembl"; transcript_biotype "protein_coding"; protein_id "ENSSSCP00000057390"; protein_version "3";
1	StringTie	exon	180147405	180147982	.	+	.	transcript_id "MSTRG.2633.2"; gene_id "MSTRG.2633"; exon_number "1";	1	ensembl	exon	180237082	180237129	.	-	.	gene_id "ENSSSCG00000036634"; gene_version "3"; transcript_id "ENSSSCT00000087108"; transcript_version "2"; exon_number "7"; gene_name "MAP4K5"; gene_source "ensembl"; gene_biotype "protein_coding"; transcript_name "MAP4K5-201"; transcript_source "ensembl"; transcript_biotype "protein_coding"; exon_id "ENSSSCE00000284713"; exon_version "1";
1	StringTie	exon	180147405	180147982	.	+	.	transcript_id "MSTRG.2633.2"; gene_id "MSTRG.2633"; exon_number "1";	1	ensembl	CDS	180237082	180237129	.	-	0	gene_id "ENSSSCG00000036634"; gene_version "3"; transcript_id "ENSSSCT00000087108"; transcript_version "2"; exon_number "7"; gene_name "MAP4K5"; gene_source "ensembl"; gene_biotype "protein_coding"; transcript_name "MAP4K5-201"; transcript_source "ensembl"; transcript_biotype "protein_coding"; protein_id "ENSSSCP00000060345"; protein_version "2";
1	StringTie	exon	180147405	180147982	.	+	.	transcript_id "MSTRG.2633.2"; gene_id "MSTRG.2633"; exon_number "1";	1	ensembl	exon	180236945	180236987	.	-	.	gene_id "ENSSSCG00000036634"; gene_version "3"; transcript_id "ENSSSCT00000087108"; transcript_version "2"; exon_number "8"; gene_name "MAP4K5"; gene_source "ensembl"; gene_biotype "protein_coding"; transcript_name "MAP4K5-201"; transcript_source "ensembl"; transcript_biotype "protein_coding"; exon_id "ENSSSCE00000331520"; exon_version "1";
1	StringTie	exon	180147405	180147982	.	+	.	transcript_id "MSTRG.2633.2"; gene_id "MSTRG.2633"; exon_number "1";	1	ensembl	CDS	180236945	180236987	.	-	0	gene_id "ENSSSCG00000036634"; gene_version "3"; transcript_id "ENSSSCT00000087108"; transcript_version "2"; exon_number "8"; gene_name "MAP4K5"; gene_source "ensembl"; gene_biotype "protein_coding"; transcript_name "MAP4K5-201"; transcript_source "ensembl"; transcript_biotype "protein_coding"; protein_id "ENSSSCP00000060345"; protein_version "2";
1	StringTie	exon	180147405	180147982	.	+	.	transcript_id "MSTRG.2633.2"; gene_id "MSTRG.2633"; exon_number "1";	1	ensembl	exon	180236106	180236178	.	-	.	gene_id "ENSSSCG00000036634"; gene_version "3"; transcript_id "ENSSSCT00000087108"; transcript_version "2"; exon_number "9"; gene_name "MAP4K5"; gene_source "ensembl"; gene_biotype "protein_coding"; transcript_name "MAP4K5-201"; transcript_source "ensembl"; transcript_biotype "protein_coding"; exon_id "ENSSSCE00000266671"; exon_version "1";
1	StringTie	exon	180147405	180147982	.	+	.	transcript_id "MSTRG.2633.2"; gene_id "MSTRG.2633"; exon_number "1";	1	ensembl	CDS	180236106	180236178	.	-	2	gene_id "ENSSSCG00000036634"; gene_version "3"; transcript_id "ENSSSCT00000087108"; transcript_version "2"; exon_number "9"; gene_name "MAP4K5"; gene_source "ensembl"; gene_biotype "protein_coding"; transcript_name "MAP4K5-201"; transcript_source "ensembl"; transcript_biotype "protein_coding"; protein_id "ENSSSCP00000060345"; protein_version "2";
1	StringTie	exon	180147405	180147982	.	+	.	transcript_id "MSTRG.2633.2"; gene_id "MSTRG.2633"; exon_number "1";	1	ensembl	exon	180229237	180229368	.	-	.	gene_id "ENSSSCG00000036634"; gene_version "3"; transcript_id "ENSSSCT00000087108"; transcript_version "2"; exon_number "10"; gene_name "MAP4K5"; gene_source "ensembl"; gene_biotype "protein_coding"; transcript_name "MAP4K5-201"; transcript_source "ensembl"; transcript_biotype "protein_coding"; exon_id "ENSSSCE00000237902"; exon_version "2";
1	StringTie	exon	180147405	180147982	.	+	.	transcript_id "MSTRG.2633.2"; gene_id "MSTRG.2633"; exon_number "1";	1	ensembl	CDS	180229237	180229368	.	-	1	gene_id "ENSSSCG00000036634"; gene_version "3"; transcript_id "ENSSSCT00000087108"; transcript_version "2"; exon_number "10"; gene_name "MAP4K5"; gene_source "ensembl"; gene_biotype "protein_coding"; transcript_name "MAP4K5-201"; transcript_source "ensembl"; transcript_biotype "protein_coding"; protein_id "ENSSSCP00000060345"; protein_version "2";
1	StringTie	exon	180147405	180147982	.	+	.	transcript_id "MSTRG.2633.2"; gene_id "MSTRG.2633"; exon_number "1";	1	ensembl	exon	180227271	180227333	.	-	.	gene_id "ENSSSCG00000036634"; gene_version "3"; transcript_id "ENSSSCT00000087108"; transcript_version "2"; exon_number "11"; gene_name "MAP4K5"; gene_source "ensembl"; gene_biotype "protein_coding"; transcript_name "MAP4K5-201"; transcript_source "ensembl"; transcript_biotype "protein_coding"; exon_id "ENSSSCE00000202015"; exon_version "2";
1	StringTie	exon	180147405	180147982	.	+	.	transcript_id "MSTRG.2633.2"; gene_id "MSTRG.2633"; exon_number "1";	1	ensembl	CDS	180227271	180227333	.	-	1	gene_id "ENSSSCG00000036634"; gene_version "3"; transcript_id "ENSSSCT00000087108"; transcript_version "2"; exon_number "11"; gene_name "MAP4K5"; gene_source "ensembl"; gene_biotype "protein_coding"; transcript_name "MAP4K5-201"; transcript_source "ensembl"; transcript_biotype "protein_coding"; protein_id "ENSSSCP00000060345"; protein_version "2";
1	StringTie	exon	180147405	180147982	.	+	.	transcript_id "MSTRG.2633.2"; gene_id "MSTRG.2633"; exon_number "1";	1	ensembl	exon	180225005	180225086	.	-	.	gene_id "ENSSSCG00000036634"; gene_version "3"; transcript_id "ENSSSCT00000087108"; transcript_version "2"; exon_number "12"; gene_name "MAP4K5"; gene_source "ensembl"; gene_biotype "protein_coding"; transcript_name "MAP4K5-201"; transcript_source "ensembl"; transcript_biotype "protein_coding"; exon_id "ENSSSCE00000239453"; exon_version "2";
1	StringTie	exon	180147405	180147982	.	+	.	transcript_id "MSTRG.2633.2"; gene_id "MSTRG.2633"; exon_number "1";	1	ensembl	CDS	180225005	180225086	.	-	1	gene_id "ENSSSCG00000036634"; gene_version "3"; transcript_id "ENSSSCT00000087108"; transcript_version "2"; exon_number "12"; gene_name "MAP4K5"; gene_source "ensembl"; gene_biotype "protein_coding"; transcript_name "MAP4K5-201"; transcript_source "ensembl"; transcript_biotype "protein_coding"; protein_id "ENSSSCP00000060345"; protein_version "2";
1	StringTie	exon	180147405	180147982	.	+	.	transcript_id "MSTRG.2633.2"; gene_id "MSTRG.2633"; exon_number "1";	1	ensembl	exon	180237082	180237129	.	-	.	gene_id "ENSSSCG00000036634"; gene_version "3"; transcript_id "ENSSSCT00000053912"; transcript_version "3"; exon_number "7"; gene_name "MAP4K5"; gene_source "ensembl"; gene_biotype "protein_coding"; transcript_name "MAP4K5-202"; transcript_source "ensembl"; transcript_biotype "protein_coding"; exon_id "ENSSSCE00000284713"; exon_version "1";
1	StringTie	exon	180147405	180147982	.	+	.	transcript_id "MSTRG.2633.2"; gene_id "MSTRG.2633"; exon_number "1";	1	ensembl	CDS	180237082	180237129	.	-	0	gene_id "ENSSSCG00000036634"; gene_version "3"; transcript_id "ENSSSCT00000053912"; transcript_version "3"; exon_number "7"; gene_name "MAP4K5"; gene_source "ensembl"; gene_biotype "protein_coding"; transcript_name "MAP4K5-202"; transcript_source "ensembl"; transcript_biotype "protein_coding"; protein_id "ENSSSCP00000057390"; protein_version "3";
1	StringTie	exon	180147405	180147982	.	+	.	transcript_id "MSTRG.2633.2"; gene_id "MSTRG.2633"; exon_number "1";	1	ensembl	exon	180236945	180236987	.	-	.	gene_id "ENSSSCG00000036634"; gene_version "3"; transcript_id "ENSSSCT00000053912"; transcript_version "3"; exon_number "8"; gene_name "MAP4K5"; gene_source "ensembl"; gene_biotype "protein_coding"; transcript_name "MAP4K5-202"; transcript_source "ensembl"; transcript_biotype "protein_coding"; exon_id "ENSSSCE00000331520"; exon_version "1";
1	StringTie	exon	180147405	180147982	.	+	.	transcript_id "MSTRG.2633.2"; gene_id "MSTRG.2633"; exon_number "1";	1	ensembl	CDS	180236945	180236987	.	-	0	gene_id "ENSSSCG00000036634"; gene_version "3"; transcript_id "ENSSSCT00000053912"; transcript_version "3"; exon_number "8"; gene_name "MAP4K5"; gene_source "ensembl"; gene_biotype "protein_coding"; transcript_name "MAP4K5-202"; transcript_source "ensembl"; transcript_biotype "protein_coding"; protein_id "ENSSSCP00000057390"; protein_version "3";
1	StringTie	exon	180147405	180147982	.	+	.	transcript_id "MSTRG.2633.2"; gene_id "MSTRG.2633"; exon_number "1";	1	ensembl	exon	180236106	180236178	.	-	.	gene_id "ENSSSCG00000036634"; gene_version "3"; transcript_id "ENSSSCT00000053912"; transcript_version "3"; exon_number "9"; gene_name "MAP4K5"; gene_source "ensembl"; gene_biotype "protein_coding"; transcript_name "MAP4K5-202"; transcript_source "ensembl"; transcript_biotype "protein_coding"; exon_id "ENSSSCE00000266671"; exon_version "1";
1	StringTie	exon	180147405	180147982	.	+	.	transcript_id "MSTRG.2633.2"; gene_id "MSTRG.2633"; exon_number "1";	1	ensembl	CDS	180236106	180236178	.	-	2	gene_id "ENSSSCG00000036634"; gene_version "3"; transcript_id "ENSSSCT00000053912"; transcript_version "3"; exon_number "9"; gene_name "MAP4K5"; gene_source "ensembl"; gene_biotype "protein_coding"; transcript_name "MAP4K5-202"; transcript_source "ensembl"; transcript_biotype "protein_coding"; protein_id "ENSSSCP00000057390"; protein_version "3";
1	StringTie	exon	180147405	180147982	.	+	.	transcript_id "MSTRG.2633.2"; gene_id "MSTRG.2633"; exon_number "1";	1	ensembl	exon	180229237	180229368	.	-	.	gene_id "ENSSSCG00000036634"; gene_version "3"; transcript_id "ENSSSCT00000053912"; transcript_version "3"; exon_number "10"; gene_name "MAP4K5"; gene_source "ensembl"; gene_biotype "protein_coding"; transcript_name "MAP4K5-202"; transcript_source "ensembl"; transcript_biotype "protein_coding"; exon_id "ENSSSCE00000237902"; exon_version "2";
1	StringTie	exon	180147405	180147982	.	+	.	transcript_id "MSTRG.2633.2"; gene_id "MSTRG.2633"; exon_number "1";	1	ensembl	CDS	180229237	180229368	.	-	1	gene_id "ENSSSCG00000036634"; gene_version "3"; transcript_id "ENSSSCT00000053912"; transcript_version "3"; exon_number "10"; gene_name "MAP4K5"; gene_source "ensembl"; gene_biotype "protein_coding"; transcript_name "MAP4K5-202"; transcript_source "ensembl"; transcript_biotype "protein_coding"; protein_id "ENSSSCP00000057390"; protein_version "3";
1	StringTie	exon	180147405	180147982	.	+	.	transcript_id "MSTRG.2633.2"; gene_id "MSTRG.2633"; exon_number "1";	1	ensembl	exon	180227271	180227333	.	-	.	gene_id "ENSSSCG00000036634"; gene_version "3"; transcript_id "ENSSSCT00000053912"; transcript_version "3"; exon_number "11"; gene_name "MAP4K5"; gene_source "ensembl"; gene_biotype "protein_coding"; transcript_name "MAP4K5-202"; transcript_source "ensembl"; transcript_biotype "protein_coding"; exon_id "ENSSSCE00000202015"; exon_version "2";
1	StringTie	exon	180147405	180147982	.	+	.	transcript_id "MSTRG.2633.2"; gene_id "MSTRG.2633"; exon_number "1";	1	ensembl	CDS	180227271	180227333	.	-	1	gene_id "ENSSSCG00000036634"; gene_version "3"; transcript_id "ENSSSCT00000053912"; transcript_version "3"; exon_number "11"; gene_name "MAP4K5"; gene_source "ensembl"; gene_biotype "protein_coding"; transcript_name "MAP4K5-202"; transcript_source "ensembl"; transcript_biotype "protein_coding"; protein_id "ENSSSCP00000057390"; protein_version "3";
1	StringTie	exon	180147405	180147982	.	+	.	transcript_id "MSTRG.2633.2"; gene_id "MSTRG.2633"; exon_number "1";	1	ensembl	exon	180225005	180225086	.	-	.	gene_id "ENSSSCG00000036634"; gene_version "3"; transcript_id "ENSSSCT00000053912"; transcript_version "3"; exon_number "12"; gene_name "MAP4K5"; gene_source "ensembl"; gene_biotype "protein_coding"; transcript_name "MAP4K5-202"; transcript_source "ensembl"; transcript_biotype "protein_coding"; exon_id "ENSSSCE00000239453"; exon_version "2";
1	StringTie	exon	180147405	180147982	.	+	.	transcript_id "MSTRG.2633.2"; gene_id "MSTRG.2633"; exon_number "1";	1	ensembl	CDS	180225005	180225086	.	-	1	gene_id "ENSSSCG00000036634"; gene_version "3"; transcript_id "ENSSSCT00000053912"; transcript_version "3"; exon_number "12"; gene_name "MAP4K5"; gene_source "ensembl"; gene_biotype "protein_coding"; transcript_name "MAP4K5-202"; transcript_source "ensembl"; transcript_biotype "protein_coding"; protein_id "ENSSSCP00000057390"; protein_version "3";
1	StringTie	exon	180147405	180147982	.	+	.	transcript_id "MSTRG.2633.2"; gene_id "MSTRG.2633"; exon_number "1";	1	ensembl	exon	180247902	180247966	.	-	.	gene_id "ENSSSCG00000036634"; gene_version "3"; transcript_id "ENSSSCT00000087108"; transcript_version "2"; exon_number "5"; gene_name "MAP4K5"; gene_source "ensembl"; gene_biotype "protein_coding"; transcript_name "MAP4K5-201"; transcript_source "ensembl"; transcript_biotype "protein_coding"; exon_id "ENSSSCE00000215435"; exon_version "2";
1	StringTie	exon	180147405	180147982	.	+	.	transcript_id "MSTRG.2633.2"; gene_id "MSTRG.2633"; exon_number "1";	1	ensembl	CDS	180247902	180247966	.	-	1	gene_id "ENSSSCG00000036634"; gene_version "3"; transcript_id "ENSSSCT00000087108"; transcript_version "2"; exon_number "5"; gene_name "MAP4K5"; gene_source "ensembl"; gene_biotype "protein_coding"; transcript_name "MAP4K5-201"; transcript_source "ensembl"; transcript_biotype "protein_coding"; protein_id "ENSSSCP00000060345"; protein_version "2";
1	StringTie	exon	180147405	180147982	.	+	.	transcript_id "MSTRG.2633.2"; gene_id "MSTRG.2633"; exon_number "1";	1	ensembl	exon	180242169	180242224	.	-	.	gene_id "ENSSSCG00000036634"; gene_version "3"; transcript_id "ENSSSCT00000087108"; transcript_version "2"; exon_number "6"; gene_name "MAP4K5"; gene_source "ensembl"; gene_biotype "protein_coding"; transcript_name "MAP4K5-201"; transcript_source "ensembl"; transcript_biotype "protein_coding"; exon_id "ENSSSCE00000310900"; exon_version "1";
1	StringTie	exon	180147405	180147982	.	+	.	transcript_id "MSTRG.2633.2"; gene_id "MSTRG.2633"; exon_number "1";	1	ensembl	CDS	180242169	180242224	.	-	2	gene_id "ENSSSCG00000036634"; gene_version "3"; transcript_id "ENSSSCT00000087108"; transcript_version "2"; exon_number "6"; gene_name "MAP4K5"; gene_source "ensembl"; gene_biotype "protein_coding"; transcript_name "MAP4K5-201"; transcript_source "ensembl"; transcript_biotype "protein_coding"; protein_id "ENSSSCP00000060345"; protein_version "2";
1	StringTie	exon	180147405	180147982	.	+	.	transcript_id "MSTRG.2633.2"; gene_id "MSTRG.2633"; exon_number "1";	1	ensembl	exon	180247902	180247966	.	-	.	gene_id "ENSSSCG00000036634"; gene_version "3"; transcript_id "ENSSSCT00000053912"; transcript_version "3"; exon_number "5"; gene_name "MAP4K5"; gene_source "ensembl"; gene_biotype "protein_coding"; transcript_name "MAP4K5-202"; transcript_source "ensembl"; transcript_biotype "protein_coding"; exon_id "ENSSSCE00000215435"; exon_version "2";
1	StringTie	exon	180147405	180147982	.	+	.	transcript_id "MSTRG.2633.2"; gene_id "MSTRG.2633"; exon_number "1";	1	ensembl	CDS	180247902	180247966	.	-	1	gene_id "ENSSSCG00000036634"; gene_version "3"; transcript_id "ENSSSCT00000053912"; transcript_version "3"; exon_number "5"; gene_name "MAP4K5"; gene_source "ensembl"; gene_biotype "protein_coding"; transcript_name "MAP4K5-202"; transcript_source "ensembl"; transcript_biotype "protein_coding"; protein_id "ENSSSCP00000057390"; protein_version "3";
1	StringTie	exon	180147405	180147982	.	+	.	transcript_id "MSTRG.2633.2"; gene_id "MSTRG.2633"; exon_number "1";	1	ensembl	exon	180242169	180242224	.	-	.	gene_id "ENSSSCG00000036634"; gene_version "3"; transcript_id "ENSSSCT00000053912"; transcript_version "3"; exon_number "6"; gene_name "MAP4K5"; gene_source "ensembl"; gene_biotype "protein_coding"; transcript_name "MAP4K5-202"; transcript_source "ensembl"; transcript_biotype "protein_coding"; exon_id "ENSSSCE00000310900"; exon_version "1";
1	StringTie	exon	180147405	180147982	.	+	.	transcript_id "MSTRG.2633.2"; gene_id "MSTRG.2633"; exon_number "1";	1	ensembl	CDS	180242169	180242224	.	-	2	gene_id "ENSSSCG00000036634"; gene_version "3"; transcript_id "ENSSSCT00000053912"; transcript_version "3"; exon_number "6"; gene_name "MAP4K5"; gene_source "ensembl"; gene_biotype "protein_coding"; transcript_name "MAP4K5-202"; transcript_source "ensembl"; transcript_biotype "protein_coding"; protein_id "ENSSSCP00000057390"; protein_version "3";
1	StringTie	exon	180147405	180147982	.	+	.	transcript_id "MSTRG.2633.2"; gene_id "MSTRG.2633"; exon_number "1";	1	ensembl	gene	180020863	180069146	.	-	.	gene_id "ENSSSCG00000005016"; gene_version "5"; gene_name "L2HGDH"; gene_source "ensembl"; gene_biotype "protein_coding";
1	StringTie	exon	180147405	180147982	.	+	.	transcript_id "MSTRG.2633.2"; gene_id "MSTRG.2633"; exon_number "1";	1	ensembl	transcript	180028101	180069146	.	-	.	gene_id "ENSSSCG00000005016"; gene_version "5"; transcript_id "ENSSSCT00000058026"; transcript_version "3"; gene_name "L2HGDH"; gene_source "ensembl"; gene_biotype "protein_coding"; transcript_name "L2HGDH-201"; transcript_source "ensembl"; transcript_biotype "protein_coding";
1	StringTie	exon	180147405	180147982	.	+	.	transcript_id "MSTRG.2633.2"; gene_id "MSTRG.2633"; exon_number "1";	1	ensembl	transcript	180026336	180069146	.	-	.	gene_id "ENSSSCG00000005016"; gene_version "5"; transcript_id "ENSSSCT00000063003"; transcript_version "3"; gene_name "L2HGDH"; gene_source "ensembl"; gene_biotype "protein_coding"; transcript_name "L2HGDH-202"; transcript_source "ensembl"; transcript_biotype "protein_coding";
1	StringTie	exon	180147405	180147982	.	+	.	transcript_id "MSTRG.2633.2"; gene_id "MSTRG.2633"; exon_number "1";	1	ensembl	transcript	180022721	180069146	.	-	.	gene_id "ENSSSCG00000005016"; gene_version "5"; transcript_id "ENSSSCT00000005532"; transcript_version "4"; gene_name "L2HGDH"; gene_source "ensembl"; gene_biotype "protein_coding"; transcript_name "L2HGDH-203"; transcript_source "ensembl"; transcript_biotype "protein_coding";
1	StringTie	exon	180147405	180147982	.	+	.	transcript_id "MSTRG.2633.2"; gene_id "MSTRG.2633"; exon_number "1";	1	ensembl	transcript	180020863	180069099	.	-	.	gene_id "ENSSSCG00000005016"; gene_version "5"; transcript_id "ENSSSCT00000079344"; transcript_version "2"; gene_name "L2HGDH"; gene_source "ensembl"; gene_biotype "protein_coding"; transcript_name "L2HGDH-204"; transcript_source "ensembl"; transcript_biotype "protein_coding";
1	StringTie	exon	180147405	180147982	.	+	.	transcript_id "MSTRG.2633.2"; gene_id "MSTRG.2633"; exon_number "1";	1	ensembl	gene	180068973	180081412	.	+	.	gene_id "ENSSSCG00000031354"; gene_version "3"; gene_name "DMAC2L"; gene_source "ensembl"; gene_biotype "protein_coding";
1	StringTie	exon	180147405	180147982	.	+	.	transcript_id "MSTRG.2633.2"; gene_id "MSTRG.2633"; exon_number "1";	1	ensembl	transcript	180069248	180076888	.	+	.	gene_id "ENSSSCG00000031354"; gene_version "3"; transcript_id "ENSSSCT00000094980"; transcript_version "1"; gene_name "DMAC2L"; gene_source "ensembl"; gene_biotype "protein_coding"; transcript_name "DMAC2L-201"; transcript_source "ensembl"; transcript_biotype "protein_coding";
1	StringTie	exon	180147405	180147982	.	+	.	transcript_id "MSTRG.2633.2"; gene_id "MSTRG.2633"; exon_number "1";	1	ensembl	transcript	180069248	180079883	.	+	.	gene_id "ENSSSCG00000031354"; gene_version "3"; transcript_id "ENSSSCT00000094790"; transcript_version "1"; gene_name "DMAC2L"; gene_source "ensembl"; gene_biotype "protein_coding"; transcript_name "DMAC2L-202"; transcript_source "ensembl"; transcript_biotype "protein_coding";
1	StringTie	exon	180147405	180147982	.	+	.	transcript_id "MSTRG.2633.2"; gene_id "MSTRG.2633"; exon_number "1";	1	ensembl	transcript	180069245	180081404	.	+	.	gene_id "ENSSSCG00000031354"; gene_version "3"; transcript_id "ENSSSCT00000041018"; transcript_version "3"; gene_name "DMAC2L"; gene_source "ensembl"; gene_biotype "protein_coding"; transcript_name "DMAC2L-203"; transcript_source "ensembl"; transcript_biotype "protein_coding";
1	StringTie	exon	180147405	180147982	.	+	.	transcript_id "MSTRG.2633.2"; gene_id "MSTRG.2633"; exon_number "1";	1	ensembl	transcript	180068973	180081412	.	+	.	gene_id "ENSSSCG00000031354"; gene_version "3"; transcript_id "ENSSSCT00000039137"; transcript_version "2"; gene_name "DMAC2L"; gene_source "ensembl"; gene_biotype "protein_coding"; transcript_name "DMAC2L-204"; transcript_source "ensembl"; transcript_biotype "protein_coding";
1	StringTie	exon	180147405	180147982	.	+	.	transcript_id "MSTRG.2633.2"; gene_id "MSTRG.2633"; exon_number "1";	1	ensembl	gene	180078659	180145054	.	-	.	gene_id "ENSSSCG00000034516"; gene_version "3"; gene_name "CDKL1"; gene_source "ensembl"; gene_biotype "protein_coding";
1	StringTie	exon	180147405	180147982	.	+	.	transcript_id "MSTRG.2633.2"; gene_id "MSTRG.2633"; exon_number "1";	1	ensembl	transcript	180086618	180145054	.	-	.	gene_id "ENSSSCG00000034516"; gene_version "3"; transcript_id "ENSSSCT00000078310"; transcript_version "2"; gene_name "CDKL1"; gene_source "ensembl"; gene_biotype "protein_coding"; transcript_name "CDKL1-201"; transcript_source "ensembl"; transcript_biotype "protein_coding";
1	StringTie	exon	180147405	180147982	.	+	.	transcript_id "MSTRG.2633.2"; gene_id "MSTRG.2633"; exon_number "1";	1	ensembl	exon	180092880	180093080	.	-	.	gene_id "ENSSSCG00000034516"; gene_version "3"; transcript_id "ENSSSCT00000078310"; transcript_version "2"; exon_number "6"; gene_name "CDKL1"; gene_source "ensembl"; gene_biotype "protein_coding"; transcript_name "CDKL1-201"; transcript_source "ensembl"; transcript_biotype "protein_coding"; exon_id "ENSSSCE00000043028"; exon_version "1";
1	StringTie	exon	180147405	180147982	.	+	.	transcript_id "MSTRG.2633.2"; gene_id "MSTRG.2633"; exon_number "1";	1	ensembl	CDS	180092880	180093080	.	-	2	gene_id "ENSSSCG00000034516"; gene_version "3"; transcript_id "ENSSSCT00000078310"; transcript_version "2"; exon_number "6"; gene_name "CDKL1"; gene_source "ensembl"; gene_biotype "protein_coding"; transcript_name "CDKL1-201"; transcript_source "ensembl"; transcript_biotype "protein_coding"; protein_id "ENSSSCP00000069969"; protein_version "1";
1	StringTie	exon	180147405	180147982	.	+	.	transcript_id "MSTRG.2633.2"; gene_id "MSTRG.2633"; exon_number "1";	1	ensembl	transcript	180084102	180145054	.	-	.	gene_id "ENSSSCG00000034516"; gene_version "3"; transcript_id "ENSSSCT00000075014"; transcript_version "2"; gene_name "CDKL1"; gene_source "ensembl"; gene_biotype "protein_coding"; transcript_name "CDKL1-202"; transcript_source "ensembl"; transcript_biotype "protein_coding";
1	StringTie	exon	180147405	180147982	.	+	.	transcript_id "MSTRG.2633.2"; gene_id "MSTRG.2633"; exon_number "1";	1	ensembl	exon	180092880	180093080	.	-	.	gene_id "ENSSSCG00000034516"; gene_version "3"; transcript_id "ENSSSCT00000075014"; transcript_version "2"; exon_number "6"; gene_name "CDKL1"; gene_source "ensembl"; gene_biotype "protein_coding"; transcript_name "CDKL1-202"; transcript_source "ensembl"; transcript_biotype "protein_coding"; exon_id "ENSSSCE00000043028"; exon_version "1";
1	StringTie	exon	180147405	180147982	.	+	.	transcript_id "MSTRG.2633.2"; gene_id "MSTRG.2633"; exon_number "1";	1	ensembl	CDS	180092880	180093080	.	-	2	gene_id "ENSSSCG00000034516"; gene_version "3"; transcript_id "ENSSSCT00000075014"; transcript_version "2"; exon_number "6"; gene_name "CDKL1"; gene_source "ensembl"; gene_biotype "protein_coding"; transcript_name "CDKL1-202"; transcript_source "ensembl"; transcript_biotype "protein_coding"; protein_id "ENSSSCP00000071907"; protein_version "2";
1	StringTie	exon	180147405	180147982	.	+	.	transcript_id "MSTRG.2633.2"; gene_id "MSTRG.2633"; exon_number "1";	1	ensembl	transcript	180078659	180145032	.	-	.	gene_id "ENSSSCG00000034516"; gene_version "3"; transcript_id "ENSSSCT00000061065"; transcript_version "2"; gene_name "CDKL1"; gene_source "ensembl"; gene_biotype "protein_coding"; transcript_name "CDKL1-203"; transcript_source "ensembl"; transcript_biotype "protein_coding";
1	StringTie	exon	180147405	180147982	.	+	.	transcript_id "MSTRG.2633.2"; gene_id "MSTRG.2633"; exon_number "1";	1	ensembl	exon	180092880	180093080	.	-	.	gene_id "ENSSSCG00000034516"; gene_version "3"; transcript_id "ENSSSCT00000061065"; transcript_version "2"; exon_number "6"; gene_name "CDKL1"; gene_source "ensembl"; gene_biotype "protein_coding"; transcript_name "CDKL1-203"; transcript_source "ensembl"; transcript_biotype "protein_coding"; exon_id "ENSSSCE00000043028"; exon_version "1";
1	StringTie	exon	180147405	180147982	.	+	.	transcript_id "MSTRG.2633.2"; gene_id "MSTRG.2633"; exon_number "1";	1	ensembl	CDS	180092880	180093080	.	-	2	gene_id "ENSSSCG00000034516"; gene_version "3"; transcript_id "ENSSSCT00000061065"; transcript_version "2"; exon_number "6"; gene_name "CDKL1"; gene_source "ensembl"; gene_biotype "protein_coding"; transcript_name "CDKL1-203"; transcript_source "ensembl"; transcript_biotype "protein_coding"; protein_id "ENSSSCP00000036467"; protein_version "1";
1	StringTie	exon	180147405	180147982	.	+	.	transcript_id "MSTRG.2633.2"; gene_id "MSTRG.2633"; exon_number "1";	1	ensembl	gene	180164458	180299496	.	-	.	gene_id "ENSSSCG00000036634"; gene_version "3"; gene_name "MAP4K5"; gene_source "ensembl"; gene_biotype "protein_coding";
1	StringTie	exon	180147405	180147982	.	+	.	transcript_id "MSTRG.2633.2"; gene_id "MSTRG.2633"; exon_number "1";	1	ensembl	transcript	180164458	180299496	.	-	.	gene_id "ENSSSCG00000036634"; gene_version "3"; transcript_id "ENSSSCT00000087108"; transcript_version "2"; gene_name "MAP4K5"; gene_source "ensembl"; gene_biotype "protein_coding"; transcript_name "MAP4K5-201"; transcript_source "ensembl"; transcript_biotype "protein_coding";
1	StringTie	exon	180147405	180147982	.	+	.	transcript_id "MSTRG.2633.2"; gene_id "MSTRG.2633"; exon_number "1";	1	ensembl	exon	180223968	180224084	.	-	.	gene_id "ENSSSCG00000036634"; gene_version "3"; transcript_id "ENSSSCT00000087108"; transcript_version "2"; exon_number "13"; gene_name "MAP4K5"; gene_source "ensembl"; gene_biotype "protein_coding"; transcript_name "MAP4K5-201"; transcript_source "ensembl"; transcript_biotype "protein_coding"; exon_id "ENSSSCE00000333668"; exon_version "1";
1	StringTie	exon	180147405	180147982	.	+	.	transcript_id "MSTRG.2633.2"; gene_id "MSTRG.2633"; exon_number "1";	1	ensembl	CDS	180223968	180224084	.	-	0	gene_id "ENSSSCG00000036634"; gene_version "3"; transcript_id "ENSSSCT00000087108"; transcript_version "2"; exon_number "13"; gene_name "MAP4K5"; gene_source "ensembl"; gene_biotype "protein_coding"; transcript_name "MAP4K5-201"; transcript_source "ensembl"; transcript_biotype "protein_coding"; protein_id "ENSSSCP00000060345"; protein_version "2";
1	StringTie	exon	180147405	180147982	.	+	.	transcript_id "MSTRG.2633.2"; gene_id "MSTRG.2633"; exon_number "1";	1	ensembl	transcript	180164458	180299496	.	-	.	gene_id "ENSSSCG00000036634"; gene_version "3"; transcript_id "ENSSSCT00000053912"; transcript_version "3"; gene_name "MAP4K5"; gene_source "ensembl"; gene_biotype "protein_coding"; transcript_name "MAP4K5-202"; transcript_source "ensembl"; transcript_biotype "protein_coding";
1	StringTie	exon	180147405	180147982	.	+	.	transcript_id "MSTRG.2633.2"; gene_id "MSTRG.2633"; exon_number "1";	1	ensembl	exon	180223968	180224084	.	-	.	gene_id "ENSSSCG00000036634"; gene_version "3"; transcript_id "ENSSSCT00000053912"; transcript_version "3"; exon_number "13"; gene_name "MAP4K5"; gene_source "ensembl"; gene_biotype "protein_coding"; transcript_name "MAP4K5-202"; transcript_source "ensembl"; transcript_biotype "protein_coding"; exon_id "ENSSSCE00000333668"; exon_version "1";
1	StringTie	exon	180147405	180147982	.	+	.	transcript_id "MSTRG.2633.2"; gene_id "MSTRG.2633"; exon_number "1";	1	ensembl	CDS	180223968	180224084	.	-	0	gene_id "ENSSSCG00000036634"; gene_version "3"; transcript_id "ENSSSCT00000053912"; transcript_version "3"; exon_number "13"; gene_name "MAP4K5"; gene_source "ensembl"; gene_biotype "protein_coding"; transcript_name "MAP4K5-202"; transcript_source "ensembl"; transcript_biotype "protein_coding"; protein_id "ENSSSCP00000057390"; protein_version "3";
1	StringTie	exon	180153304	180153417	.	+	.	transcript_id "MSTRG.2633.2"; gene_id "MSTRG.2633"; exon_number "2";	1	ensembl	exon	180056949	180057080	.	-	.	gene_id "ENSSSCG00000005016"; gene_version "5"; transcript_id "ENSSSCT00000058026"; transcript_version "3"; exon_number "4"; gene_name "L2HGDH"; gene_source "ensembl"; gene_biotype "protein_coding"; transcript_name "L2HGDH-201"; transcript_source "ensembl"; transcript_biotype "protein_coding"; exon_id "ENSSSCE00000043013"; exon_version "1";
1	StringTie	exon	180153304	180153417	.	+	.	transcript_id "MSTRG.2633.2"; gene_id "MSTRG.2633"; exon_number "2";	1	ensembl	CDS	180056949	180057080	.	-	0	gene_id "ENSSSCG00000005016"; gene_version "5"; transcript_id "ENSSSCT00000058026"; transcript_version "3"; exon_number "4"; gene_name "L2HGDH"; gene_source "ensembl"; gene_biotype "protein_coding"; transcript_name "L2HGDH-201"; transcript_source "ensembl"; transcript_biotype "protein_coding"; protein_id "ENSSSCP00000040701"; protein_version "2";
1	StringTie	exon	180153304	180153417	.	+	.	transcript_id "MSTRG.2633.2"; gene_id "MSTRG.2633"; exon_number "2";	1	ensembl	exon	180056949	180057080	.	-	.	gene_id "ENSSSCG00000005016"; gene_version "5"; transcript_id "ENSSSCT00000063003"; transcript_version "3"; exon_number "4"; gene_name "L2HGDH"; gene_source "ensembl"; gene_biotype "protein_coding"; transcript_name "L2HGDH-202"; transcript_source "ensembl"; transcript_biotype "protein_coding"; exon_id "ENSSSCE00000043013"; exon_version "1";
1	StringTie	exon	180153304	180153417	.	+	.	transcript_id "MSTRG.2633.2"; gene_id "MSTRG.2633"; exon_number "2";	1	ensembl	CDS	180056949	180057080	.	-	0	gene_id "ENSSSCG00000005016"; gene_version "5"; transcript_id "ENSSSCT00000063003"; transcript_version "3"; exon_number "4"; gene_name "L2HGDH"; gene_source "ensembl"; gene_biotype "protein_coding"; transcript_name "L2HGDH-202"; transcript_source "ensembl"; transcript_biotype "protein_coding"; protein_id "ENSSSCP00000034040"; protein_version "3";
1	StringTie	exon	180153304	180153417	.	+	.	transcript_id "MSTRG.2633.2"; gene_id "MSTRG.2633"; exon_number "2";	1	ensembl	exon	180056949	180057080	.	-	.	gene_id "ENSSSCG00000005016"; gene_version "5"; transcript_id "ENSSSCT00000005532"; transcript_version "4"; exon_number "4"; gene_name "L2HGDH"; gene_source "ensembl"; gene_biotype "protein_coding"; transcript_name "L2HGDH-203"; transcript_source "ensembl"; transcript_biotype "protein_coding"; exon_id "ENSSSCE00000043013"; exon_version "1";
1	StringTie	exon	180153304	180153417	.	+	.	transcript_id "MSTRG.2633.2"; gene_id "MSTRG.2633"; exon_number "2";	1	ensembl	CDS	180056949	180057080	.	-	0	gene_id "ENSSSCG00000005016"; gene_version "5"; transcript_id "ENSSSCT00000005532"; transcript_version "4"; exon_number "4"; gene_name "L2HGDH"; gene_source "ensembl"; gene_biotype "protein_coding"; transcript_name "L2HGDH-203"; transcript_source "ensembl"; transcript_biotype "protein_coding"; protein_id "ENSSSCP00000005394"; protein_version "3";
1	StringTie	exon	180153304	180153417	.	+	.	transcript_id "MSTRG.2633.2"; gene_id "MSTRG.2633"; exon_number "2";	1	ensembl	exon	180056949	180057080	.	-	.	gene_id "ENSSSCG00000005016"; gene_version "5"; transcript_id "ENSSSCT00000079344"; transcript_version "2"; exon_number "4"; gene_name "L2HGDH"; gene_source "ensembl"; gene_biotype "protein_coding"; transcript_name "L2HGDH-204"; transcript_source "ensembl"; transcript_biotype "protein_coding"; exon_id "ENSSSCE00000043013"; exon_version "1";
1	StringTie	exon	180153304	180153417	.	+	.	transcript_id "MSTRG.2633.2"; gene_id "MSTRG.2633"; exon_number "2";	1	ensembl	CDS	180056949	180057080	.	-	0	gene_id "ENSSSCG00000005016"; gene_version "5"; transcript_id "ENSSSCT00000079344"; transcript_version "2"; exon_number "4"; gene_name "L2HGDH"; gene_source "ensembl"; gene_biotype "protein_coding"; transcript_name "L2HGDH-204"; transcript_source "ensembl"; transcript_biotype "protein_coding"; protein_id "ENSSSCP00000066108"; protein_version "2";
1	StringTie	exon	180153304	180153417	.	+	.	transcript_id "MSTRG.2633.2"; gene_id "MSTRG.2633"; exon_number "2";	1	ensembl	exon	180068926	180069146	.	-	.	gene_id "ENSSSCG00000005016"; gene_version "5"; transcript_id "ENSSSCT00000058026"; transcript_version "3"; exon_number "1"; gene_name "L2HGDH"; gene_source "ensembl"; gene_biotype "protein_coding"; transcript_name "L2HGDH-201"; transcript_source "ensembl"; transcript_biotype "protein_coding"; exon_id "ENSSSCE00000328990"; exon_version "2";
1	StringTie	exon	180153304	180153417	.	+	.	transcript_id "MSTRG.2633.2"; gene_id "MSTRG.2633"; exon_number "2";	1	ensembl	CDS	180068926	180069065	.	-	0	gene_id "ENSSSCG00000005016"; gene_version "5"; transcript_id "ENSSSCT00000058026"; transcript_version "3"; exon_number "1"; gene_name "L2HGDH"; gene_source "ensembl"; gene_biotype "protein_coding"; transcript_name "L2HGDH-201"; transcript_source "ensembl"; transcript_biotype "protein_coding"; protein_id "ENSSSCP00000040701"; protein_version "2";
1	StringTie	exon	180153304	180153417	.	+	.	transcript_id "MSTRG.2633.2"; gene_id "MSTRG.2633"; exon_number "2";	1	ensembl	start_codon	180069063	180069065	.	-	0	gene_id "ENSSSCG00000005016"; gene_version "5"; transcript_id "ENSSSCT00000058026"; transcript_version "3"; exon_number "1"; gene_name "L2HGDH"; gene_source "ensembl"; gene_biotype "protein_coding"; transcript_name "L2HGDH-201"; transcript_source "ensembl"; transcript_biotype "protein_coding";
1	StringTie	exon	180153304	180153417	.	+	.	transcript_id "MSTRG.2633.2"; gene_id "MSTRG.2633"; exon_number "2";	1	ensembl	exon	180065356	180065471	.	-	.	gene_id "ENSSSCG00000005016"; gene_version "5"; transcript_id "ENSSSCT00000058026"; transcript_version "3"; exon_number "2"; gene_name "L2HGDH"; gene_source "ensembl"; gene_biotype "protein_coding"; transcript_name "L2HGDH-201"; transcript_source "ensembl"; transcript_biotype "protein_coding"; exon_id "ENSSSCE00000043011"; exon_version "1";
1	StringTie	exon	180153304	180153417	.	+	.	transcript_id "MSTRG.2633.2"; gene_id "MSTRG.2633"; exon_number "2";	1	ensembl	CDS	180065356	180065471	.	-	1	gene_id "ENSSSCG00000005016"; gene_version "5"; transcript_id "ENSSSCT00000058026"; transcript_version "3"; exon_number "2"; gene_name "L2HGDH"; gene_source "ensembl"; gene_biotype "protein_coding"; transcript_name "L2HGDH-201"; transcript_source "ensembl"; transcript_biotype "protein_coding"; protein_id "ENSSSCP00000040701"; protein_version "2";
1	StringTie	exon	180153304	180153417	.	+	.	transcript_id "MSTRG.2633.2"; gene_id "MSTRG.2633"; exon_number "2";	1	ensembl	exon	180064546	180064697	.	-	.	gene_id "ENSSSCG00000005016"; gene_version "5"; transcript_id "ENSSSCT00000058026"; transcript_version "3"; exon_number "3"; gene_name "L2HGDH"; gene_source "ensembl"; gene_biotype "protein_coding"; transcript_name "L2HGDH-201"; transcript_source "ensembl"; transcript_biotype "protein_coding"; exon_id "ENSSSCE00000043012"; exon_version "1";
1	StringTie	exon	180153304	180153417	.	+	.	transcript_id "MSTRG.2633.2"; gene_id "MSTRG.2633"; exon_number "2";	1	ensembl	CDS	180064546	180064697	.	-	2	gene_id "ENSSSCG00000005016"; gene_version "5"; transcript_id "ENSSSCT00000058026"; transcript_version "3"; exon_number "3"; gene_name "L2HGDH"; gene_source "ensembl"; gene_biotype "protein_coding"; transcript_name "L2HGDH-201"; transcript_source "ensembl"; transcript_biotype "protein_coding"; protein_id "ENSSSCP00000040701"; protein_version "2";
1	StringTie	exon	180153304	180153417	.	+	.	transcript_id "MSTRG.2633.2"; gene_id "MSTRG.2633"; exon_number "2";	1	ensembl	five_prime_utr	180069066	180069146	.	-	.	gene_id "ENSSSCG00000005016"; gene_version "5"; transcript_id "ENSSSCT00000058026"; transcript_version "3"; gene_name "L2HGDH"; gene_source "ensembl"; gene_biotype "protein_coding"; transcript_name "L2HGDH-201"; transcript_source "ensembl"; transcript_biotype "protein_coding";
1	StringTie	exon	180153304	180153417	.	+	.	transcript_id "MSTRG.2633.2"; gene_id "MSTRG.2633"; exon_number "2";	1	ensembl	exon	180068926	180069146	.	-	.	gene_id "ENSSSCG00000005016"; gene_version "5"; transcript_id "ENSSSCT00000063003"; transcript_version "3"; exon_number "1"; gene_name "L2HGDH"; gene_source "ensembl"; gene_biotype "protein_coding"; transcript_name "L2HGDH-202"; transcript_source "ensembl"; transcript_biotype "protein_coding"; exon_id "ENSSSCE00000328990"; exon_version "2";
1	StringTie	exon	180153304	180153417	.	+	.	transcript_id "MSTRG.2633.2"; gene_id "MSTRG.2633"; exon_number "2";	1	ensembl	CDS	180068926	180069065	.	-	0	gene_id "ENSSSCG00000005016"; gene_version "5"; transcript_id "ENSSSCT00000063003"; transcript_version "3"; exon_number "1"; gene_name "L2HGDH"; gene_source "ensembl"; gene_biotype "protein_coding"; transcript_name "L2HGDH-202"; transcript_source "ensembl"; transcript_biotype "protein_coding"; protein_id "ENSSSCP00000034040"; protein_version "3";
1	StringTie	exon	180153304	180153417	.	+	.	transcript_id "MSTRG.2633.2"; gene_id "MSTRG.2633"; exon_number "2";	1	ensembl	start_codon	180069063	180069065	.	-	0	gene_id "ENSSSCG00000005016"; gene_version "5"; transcript_id "ENSSSCT00000063003"; transcript_version "3"; exon_number "1"; gene_name "L2HGDH"; gene_source "ensembl"; gene_biotype "protein_coding"; transcript_name "L2HGDH-202"; transcript_source "ensembl"; transcript_biotype "protein_coding";
1	StringTie	exon	180153304	180153417	.	+	.	transcript_id "MSTRG.2633.2"; gene_id "MSTRG.2633"; exon_number "2";	1	ensembl	exon	180065356	180065471	.	-	.	gene_id "ENSSSCG00000005016"; gene_version "5"; transcript_id "ENSSSCT00000063003"; transcript_version "3"; exon_number "2"; gene_name "L2HGDH"; gene_source "ensembl"; gene_biotype "protein_coding"; transcript_name "L2HGDH-202"; transcript_source "ensembl"; transcript_biotype "protein_coding"; exon_id "ENSSSCE00000043011"; exon_version "1";
1	StringTie	exon	180153304	180153417	.	+	.	transcript_id "MSTRG.2633.2"; gene_id "MSTRG.2633"; exon_number "2";	1	ensembl	CDS	180065356	180065471	.	-	1	gene_id "ENSSSCG00000005016"; gene_version "5"; transcript_id "ENSSSCT00000063003"; transcript_version "3"; exon_number "2"; gene_name "L2HGDH"; gene_source "ensembl"; gene_biotype "protein_coding"; transcript_name "L2HGDH-202"; transcript_source "ensembl"; transcript_biotype "protein_coding"; protein_id "ENSSSCP00000034040"; protein_version "3";
1	StringTie	exon	180153304	180153417	.	+	.	transcript_id "MSTRG.2633.2"; gene_id "MSTRG.2633"; exon_number "2";	1	ensembl	exon	180064546	180064697	.	-	.	gene_id "ENSSSCG00000005016"; gene_version "5"; transcript_id "ENSSSCT00000063003"; transcript_version "3"; exon_number "3"; gene_name "L2HGDH"; gene_source "ensembl"; gene_biotype "protein_coding"; transcript_name "L2HGDH-202"; transcript_source "ensembl"; transcript_biotype "protein_coding"; exon_id "ENSSSCE00000043012"; exon_version "1";
1	StringTie	exon	180153304	180153417	.	+	.	transcript_id "MSTRG.2633.2"; gene_id "MSTRG.2633"; exon_number "2";	1	ensembl	CDS	180064546	180064697	.	-	2	gene_id "ENSSSCG00000005016"; gene_version "5"; transcript_id "ENSSSCT00000063003"; transcript_version "3"; exon_number "3"; gene_name "L2HGDH"; gene_source "ensembl"; gene_biotype "protein_coding"; transcript_name "L2HGDH-202"; transcript_source "ensembl"; transcript_biotype "protein_coding"; protein_id "ENSSSCP00000034040"; protein_version "3";
1	StringTie	exon	180153304	180153417	.	+	.	transcript_id "MSTRG.2633.2"; gene_id "MSTRG.2633"; exon_number "2";	1	ensembl	five_prime_utr	180069066	180069146	.	-	.	gene_id "ENSSSCG00000005016"; gene_version "5"; transcript_id "ENSSSCT00000063003"; transcript_version "3"; gene_name "L2HGDH"; gene_source "ensembl"; gene_biotype "protein_coding"; transcript_name "L2HGDH-202"; transcript_source "ensembl"; transcript_biotype "protein_coding";
1	StringTie	exon	180153304	180153417	.	+	.	transcript_id "MSTRG.2633.2"; gene_id "MSTRG.2633"; exon_number "2";	1	ensembl	exon	180068926	180069146	.	-	.	gene_id "ENSSSCG00000005016"; gene_version "5"; transcript_id "ENSSSCT00000005532"; transcript_version "4"; exon_number "1"; gene_name "L2HGDH"; gene_source "ensembl"; gene_biotype "protein_coding"; transcript_name "L2HGDH-203"; transcript_source "ensembl"; transcript_biotype "protein_coding"; exon_id "ENSSSCE00000328990"; exon_version "2";
1	StringTie	exon	180153304	180153417	.	+	.	transcript_id "MSTRG.2633.2"; gene_id "MSTRG.2633"; exon_number "2";	1	ensembl	CDS	180068926	180069065	.	-	0	gene_id "ENSSSCG00000005016"; gene_version "5"; transcript_id "ENSSSCT00000005532"; transcript_version "4"; exon_number "1"; gene_name "L2HGDH"; gene_source "ensembl"; gene_biotype "protein_coding"; transcript_name "L2HGDH-203"; transcript_source "ensembl"; transcript_biotype "protein_coding"; protein_id "ENSSSCP00000005394"; protein_version "3";
1	StringTie	exon	180153304	180153417	.	+	.	transcript_id "MSTRG.2633.2"; gene_id "MSTRG.2633"; exon_number "2";	1	ensembl	start_codon	180069063	180069065	.	-	0	gene_id "ENSSSCG00000005016"; gene_version "5"; transcript_id "ENSSSCT00000005532"; transcript_version "4"; exon_number "1"; gene_name "L2HGDH"; gene_source "ensembl"; gene_biotype "protein_coding"; transcript_name "L2HGDH-203"; transcript_source "ensembl"; transcript_biotype "protein_coding";
1	StringTie	exon	180153304	180153417	.	+	.	transcript_id "MSTRG.2633.2"; gene_id "MSTRG.2633"; exon_number "2";	1	ensembl	exon	180065356	180065471	.	-	.	gene_id "ENSSSCG00000005016"; gene_version "5"; transcript_id "ENSSSCT00000005532"; transcript_version "4"; exon_number "2"; gene_name "L2HGDH"; gene_source "ensembl"; gene_biotype "protein_coding"; transcript_name "L2HGDH-203"; transcript_source "ensembl"; transcript_biotype "protein_coding"; exon_id "ENSSSCE00000043011"; exon_version "1";
1	StringTie	exon	180153304	180153417	.	+	.	transcript_id "MSTRG.2633.2"; gene_id "MSTRG.2633"; exon_number "2";	1	ensembl	CDS	180065356	180065471	.	-	1	gene_id "ENSSSCG00000005016"; gene_version "5"; transcript_id "ENSSSCT00000005532"; transcript_version "4"; exon_number "2"; gene_name "L2HGDH"; gene_source "ensembl"; gene_biotype "protein_coding"; transcript_name "L2HGDH-203"; transcript_source "ensembl"; transcript_biotype "protein_coding"; protein_id "ENSSSCP00000005394"; protein_version "3";
1	StringTie	exon	180153304	180153417	.	+	.	transcript_id "MSTRG.2633.2"; gene_id "MSTRG.2633"; exon_number "2";	1	ensembl	exon	180064546	180064697	.	-	.	gene_id "ENSSSCG00000005016"; gene_version "5"; transcript_id "ENSSSCT00000005532"; transcript_version "4"; exon_number "3"; gene_name "L2HGDH"; gene_source "ensembl"; gene_biotype "protein_coding"; transcript_name "L2HGDH-203"; transcript_source "ensembl"; transcript_biotype "protein_coding"; exon_id "ENSSSCE00000043012"; exon_version "1";
1	StringTie	exon	180153304	180153417	.	+	.	transcript_id "MSTRG.2633.2"; gene_id "MSTRG.2633"; exon_number "2";	1	ensembl	CDS	180064546	180064697	.	-	2	gene_id "ENSSSCG00000005016"; gene_version "5"; transcript_id "ENSSSCT00000005532"; transcript_version "4"; exon_number "3"; gene_name "L2HGDH"; gene_source "ensembl"; gene_biotype "protein_coding"; transcript_name "L2HGDH-203"; transcript_source "ensembl"; transcript_biotype "protein_coding"; protein_id "ENSSSCP00000005394"; protein_version "3";
1	StringTie	exon	180153304	180153417	.	+	.	transcript_id "MSTRG.2633.2"; gene_id "MSTRG.2633"; exon_number "2";	1	ensembl	five_prime_utr	180069066	180069146	.	-	.	gene_id "ENSSSCG00000005016"; gene_version "5"; transcript_id "ENSSSCT00000005532"; transcript_version "4"; gene_name "L2HGDH"; gene_source "ensembl"; gene_biotype "protein_coding"; transcript_name "L2HGDH-203"; transcript_source "ensembl"; transcript_biotype "protein_coding";
1	StringTie	exon	180153304	180153417	.	+	.	transcript_id "MSTRG.2633.2"; gene_id "MSTRG.2633"; exon_number "2";	1	ensembl	exon	180068926	180069099	.	-	.	gene_id "ENSSSCG00000005016"; gene_version "5"; transcript_id "ENSSSCT00000079344"; transcript_version "2"; exon_number "1"; gene_name "L2HGDH"; gene_source "ensembl"; gene_biotype "protein_coding"; transcript_name "L2HGDH-204"; transcript_source "ensembl"; transcript_biotype "protein_coding"; exon_id "ENSSSCE00000043010"; exon_version "4";
1	StringTie	exon	180153304	180153417	.	+	.	transcript_id "MSTRG.2633.2"; gene_id "MSTRG.2633"; exon_number "2";	1	ensembl	CDS	180068926	180069065	.	-	0	gene_id "ENSSSCG00000005016"; gene_version "5"; transcript_id "ENSSSCT00000079344"; transcript_version "2"; exon_number "1"; gene_name "L2HGDH"; gene_source "ensembl"; gene_biotype "protein_coding"; transcript_name "L2HGDH-204"; transcript_source "ensembl"; transcript_biotype "protein_coding"; protein_id "ENSSSCP00000066108"; protein_version "2";
1	StringTie	exon	180153304	180153417	.	+	.	transcript_id "MSTRG.2633.2"; gene_id "MSTRG.2633"; exon_number "2";	1	ensembl	start_codon	180069063	180069065	.	-	0	gene_id "ENSSSCG00000005016"; gene_version "5"; transcript_id "ENSSSCT00000079344"; transcript_version "2"; exon_number "1"; gene_name "L2HGDH"; gene_source "ensembl"; gene_biotype "protein_coding"; transcript_name "L2HGDH-204"; transcript_source "ensembl"; transcript_biotype "protein_coding";
1	StringTie	exon	180153304	180153417	.	+	.	transcript_id "MSTRG.2633.2"; gene_id "MSTRG.2633"; exon_number "2";	1	ensembl	exon	180065356	180065471	.	-	.	gene_id "ENSSSCG00000005016"; gene_version "5"; transcript_id "ENSSSCT00000079344"; transcript_version "2"; exon_number "2"; gene_name "L2HGDH"; gene_source "ensembl"; gene_biotype "protein_coding"; transcript_name "L2HGDH-204"; transcript_source "ensembl"; transcript_biotype "protein_coding"; exon_id "ENSSSCE00000043011"; exon_version "1";
1	StringTie	exon	180153304	180153417	.	+	.	transcript_id "MSTRG.2633.2"; gene_id "MSTRG.2633"; exon_number "2";	1	ensembl	CDS	180065356	180065471	.	-	1	gene_id "ENSSSCG00000005016"; gene_version "5"; transcript_id "ENSSSCT00000079344"; transcript_version "2"; exon_number "2"; gene_name "L2HGDH"; gene_source "ensembl"; gene_biotype "protein_coding"; transcript_name "L2HGDH-204"; transcript_source "ensembl"; transcript_biotype "protein_coding"; protein_id "ENSSSCP00000066108"; protein_version "2";
1	StringTie	exon	180153304	180153417	.	+	.	transcript_id "MSTRG.2633.2"; gene_id "MSTRG.2633"; exon_number "2";	1	ensembl	exon	180064546	180064697	.	-	.	gene_id "ENSSSCG00000005016"; gene_version "5"; transcript_id "ENSSSCT00000079344"; transcript_version "2"; exon_number "3"; gene_name "L2HGDH"; gene_source "ensembl"; gene_biotype "protein_coding"; transcript_name "L2HGDH-204"; transcript_source "ensembl"; transcript_biotype "protein_coding"; exon_id "ENSSSCE00000043012"; exon_version "1";
1	StringTie	exon	180153304	180153417	.	+	.	transcript_id "MSTRG.2633.2"; gene_id "MSTRG.2633"; exon_number "2";	1	ensembl	CDS	180064546	180064697	.	-	2	gene_id "ENSSSCG00000005016"; gene_version "5"; transcript_id "ENSSSCT00000079344"; transcript_version "2"; exon_number "3"; gene_name "L2HGDH"; gene_source "ensembl"; gene_biotype "protein_coding"; transcript_name "L2HGDH-204"; transcript_source "ensembl"; transcript_biotype "protein_coding"; protein_id "ENSSSCP00000066108"; protein_version "2";
1	StringTie	exon	180153304	180153417	.	+	.	transcript_id "MSTRG.2633.2"; gene_id "MSTRG.2633"; exon_number "2";	1	ensembl	five_prime_utr	180069066	180069099	.	-	.	gene_id "ENSSSCG00000005016"; gene_version "5"; transcript_id "ENSSSCT00000079344"; transcript_version "2"; gene_name "L2HGDH"; gene_source "ensembl"; gene_biotype "protein_coding"; transcript_name "L2HGDH-204"; transcript_source "ensembl"; transcript_biotype "protein_coding";
1	StringTie	exon	180153304	180153417	.	+	.	transcript_id "MSTRG.2633.2"; gene_id "MSTRG.2633"; exon_number "2";	1	ensembl	exon	180069248	180069307	.	+	.	gene_id "ENSSSCG00000031354"; gene_version "3"; transcript_id "ENSSSCT00000094980"; transcript_version "1"; exon_number "1"; gene_name "DMAC2L"; gene_source "ensembl"; gene_biotype "protein_coding"; transcript_name "DMAC2L-201"; transcript_source "ensembl"; transcript_biotype "protein_coding"; exon_id "ENSSSCE00000522885"; exon_version "1";
1	StringTie	exon	180153304	180153417	.	+	.	transcript_id "MSTRG.2633.2"; gene_id "MSTRG.2633"; exon_number "2";	1	ensembl	exon	180074977	180075241	.	+	.	gene_id "ENSSSCG00000031354"; gene_version "3"; transcript_id "ENSSSCT00000094980"; transcript_version "1"; exon_number "2"; gene_name "DMAC2L"; gene_source "ensembl"; gene_biotype "protein_coding"; transcript_name "DMAC2L-201"; transcript_source "ensembl"; transcript_biotype "protein_coding"; exon_id "ENSSSCE00000515491"; exon_version "1";
1	StringTie	exon	180153304	180153417	.	+	.	transcript_id "MSTRG.2633.2"; gene_id "MSTRG.2633"; exon_number "2";	1	ensembl	exon	180075360	180075471	.	+	.	gene_id "ENSSSCG00000031354"; gene_version "3"; transcript_id "ENSSSCT00000094980"; transcript_version "1"; exon_number "3"; gene_name "DMAC2L"; gene_source "ensembl"; gene_biotype "protein_coding"; transcript_name "DMAC2L-201"; transcript_source "ensembl"; transcript_biotype "protein_coding"; exon_id "ENSSSCE00000336988"; exon_version "1";
1	StringTie	exon	180153304	180153417	.	+	.	transcript_id "MSTRG.2633.2"; gene_id "MSTRG.2633"; exon_number "2";	1	ensembl	CDS	180075365	180075471	.	+	0	gene_id "ENSSSCG00000031354"; gene_version "3"; transcript_id "ENSSSCT00000094980"; transcript_version "1"; exon_number "3"; gene_name "DMAC2L"; gene_source "ensembl"; gene_biotype "protein_coding"; transcript_name "DMAC2L-201"; transcript_source "ensembl"; transcript_biotype "protein_coding"; protein_id "ENSSSCP00000080422"; protein_version "1";
1	StringTie	exon	180153304	180153417	.	+	.	transcript_id "MSTRG.2633.2"; gene_id "MSTRG.2633"; exon_number "2";	1	ensembl	start_codon	180075365	180075367	.	+	0	gene_id "ENSSSCG00000031354"; gene_version "3"; transcript_id "ENSSSCT00000094980"; transcript_version "1"; exon_number "3"; gene_name "DMAC2L"; gene_source "ensembl"; gene_biotype "protein_coding"; transcript_name "DMAC2L-201"; transcript_source "ensembl"; transcript_biotype "protein_coding";
1	StringTie	exon	180153304	180153417	.	+	.	transcript_id "MSTRG.2633.2"; gene_id "MSTRG.2633"; exon_number "2";	1	ensembl	five_prime_utr	180069248	180069307	.	+	.	gene_id "ENSSSCG00000031354"; gene_version "3"; transcript_id "ENSSSCT00000094980"; transcript_version "1"; gene_name "DMAC2L"; gene_source "ensembl"; gene_biotype "protein_coding"; transcript_name "DMAC2L-201"; transcript_source "ensembl"; transcript_biotype "protein_coding";
1	StringTie	exon	180153304	180153417	.	+	.	transcript_id "MSTRG.2633.2"; gene_id "MSTRG.2633"; exon_number "2";	1	ensembl	five_prime_utr	180074977	180075241	.	+	.	gene_id "ENSSSCG00000031354"; gene_version "3"; transcript_id "ENSSSCT00000094980"; transcript_version "1"; gene_name "DMAC2L"; gene_source "ensembl"; gene_biotype "protein_coding"; transcript_name "DMAC2L-201"; transcript_source "ensembl"; transcript_biotype "protein_coding";
1	StringTie	exon	180153304	180153417	.	+	.	transcript_id "MSTRG.2633.2"; gene_id "MSTRG.2633"; exon_number "2";	1	ensembl	five_prime_utr	180075360	180075364	.	+	.	gene_id "ENSSSCG00000031354"; gene_version "3"; transcript_id "ENSSSCT00000094980"; transcript_version "1"; gene_name "DMAC2L"; gene_source "ensembl"; gene_biotype "protein_coding"; transcript_name "DMAC2L-201"; transcript_source "ensembl"; transcript_biotype "protein_coding";
1	StringTie	exon	180153304	180153417	.	+	.	transcript_id "MSTRG.2633.2"; gene_id "MSTRG.2633"; exon_number "2";	1	ensembl	exon	180069248	180069307	.	+	.	gene_id "ENSSSCG00000031354"; gene_version "3"; transcript_id "ENSSSCT00000094790"; transcript_version "1"; exon_number "1"; gene_name "DMAC2L"; gene_source "ensembl"; gene_biotype "protein_coding"; transcript_name "DMAC2L-202"; transcript_source "ensembl"; transcript_biotype "protein_coding"; exon_id "ENSSSCE00000522885"; exon_version "1";
1	StringTie	exon	180153304	180153417	.	+	.	transcript_id "MSTRG.2633.2"; gene_id "MSTRG.2633"; exon_number "2";	1	ensembl	exon	180074977	180075241	.	+	.	gene_id "ENSSSCG00000031354"; gene_version "3"; transcript_id "ENSSSCT00000094790"; transcript_version "1"; exon_number "2"; gene_name "DMAC2L"; gene_source "ensembl"; gene_biotype "protein_coding"; transcript_name "DMAC2L-202"; transcript_source "ensembl"; transcript_biotype "protein_coding"; exon_id "ENSSSCE00000515491"; exon_version "1";
1	StringTie	exon	180153304	180153417	.	+	.	transcript_id "MSTRG.2633.2"; gene_id "MSTRG.2633"; exon_number "2";	1	ensembl	exon	180075360	180075471	.	+	.	gene_id "ENSSSCG00000031354"; gene_version "3"; transcript_id "ENSSSCT00000094790"; transcript_version "1"; exon_number "3"; gene_name "DMAC2L"; gene_source "ensembl"; gene_biotype "protein_coding"; transcript_name "DMAC2L-202"; transcript_source "ensembl"; transcript_biotype "protein_coding"; exon_id "ENSSSCE00000336988"; exon_version "1";
1	StringTie	exon	180153304	180153417	.	+	.	transcript_id "MSTRG.2633.2"; gene_id "MSTRG.2633"; exon_number "2";	1	ensembl	CDS	180075365	180075471	.	+	0	gene_id "ENSSSCG00000031354"; gene_version "3"; transcript_id "ENSSSCT00000094790"; transcript_version "1"; exon_number "3"; gene_name "DMAC2L"; gene_source "ensembl"; gene_biotype "protein_coding"; transcript_name "DMAC2L-202"; transcript_source "ensembl"; transcript_biotype "protein_coding"; protein_id "ENSSSCP00000075286"; protein_version "1";
1	StringTie	exon	180153304	180153417	.	+	.	transcript_id "MSTRG.2633.2"; gene_id "MSTRG.2633"; exon_number "2";	1	ensembl	start_codon	180075365	180075367	.	+	0	gene_id "ENSSSCG00000031354"; gene_version "3"; transcript_id "ENSSSCT00000094790"; transcript_version "1"; exon_number "3"; gene_name "DMAC2L"; gene_source "ensembl"; gene_biotype "protein_coding"; transcript_name "DMAC2L-202"; transcript_source "ensembl"; transcript_biotype "protein_coding";
1	StringTie	exon	180153304	180153417	.	+	.	transcript_id "MSTRG.2633.2"; gene_id "MSTRG.2633"; exon_number "2";	1	ensembl	five_prime_utr	180069248	180069307	.	+	.	gene_id "ENSSSCG00000031354"; gene_version "3"; transcript_id "ENSSSCT00000094790"; transcript_version "1"; gene_name "DMAC2L"; gene_source "ensembl"; gene_biotype "protein_coding"; transcript_name "DMAC2L-202"; transcript_source "ensembl"; transcript_biotype "protein_coding";
1	StringTie	exon	180153304	180153417	.	+	.	transcript_id "MSTRG.2633.2"; gene_id "MSTRG.2633"; exon_number "2";	1	ensembl	five_prime_utr	180074977	180075241	.	+	.	gene_id "ENSSSCG00000031354"; gene_version "3"; transcript_id "ENSSSCT00000094790"; transcript_version "1"; gene_name "DMAC2L"; gene_source "ensembl"; gene_biotype "protein_coding"; transcript_name "DMAC2L-202"; transcript_source "ensembl"; transcript_biotype "protein_coding";
1	StringTie	exon	180153304	180153417	.	+	.	transcript_id "MSTRG.2633.2"; gene_id "MSTRG.2633"; exon_number "2";	1	ensembl	five_prime_utr	180075360	180075364	.	+	.	gene_id "ENSSSCG00000031354"; gene_version "3"; transcript_id "ENSSSCT00000094790"; transcript_version "1"; gene_name "DMAC2L"; gene_source "ensembl"; gene_biotype "protein_coding"; transcript_name "DMAC2L-202"; transcript_source "ensembl"; transcript_biotype "protein_coding";
1	StringTie	exon	180153304	180153417	.	+	.	transcript_id "MSTRG.2633.2"; gene_id "MSTRG.2633"; exon_number "2";	1	ensembl	exon	180069245	180069307	.	+	.	gene_id "ENSSSCG00000031354"; gene_version "3"; transcript_id "ENSSSCT00000041018"; transcript_version "3"; exon_number "1"; gene_name "DMAC2L"; gene_source "ensembl"; gene_biotype "protein_coding"; transcript_name "DMAC2L-203"; transcript_source "ensembl"; transcript_biotype "protein_coding"; exon_id "ENSSSCE00000043020"; exon_version "5";
1	StringTie	exon	180153304	180153417	.	+	.	transcript_id "MSTRG.2633.2"; gene_id "MSTRG.2633"; exon_number "2";	1	ensembl	exon	180075048	180075241	.	+	.	gene_id "ENSSSCG00000031354"; gene_version "3"; transcript_id "ENSSSCT00000041018"; transcript_version "3"; exon_number "2"; gene_name "DMAC2L"; gene_source "ensembl"; gene_biotype "protein_coding"; transcript_name "DMAC2L-203"; transcript_source "ensembl"; transcript_biotype "protein_coding"; exon_id "ENSSSCE00000043021"; exon_version "1";
1	StringTie	exon	180153304	180153417	.	+	.	transcript_id "MSTRG.2633.2"; gene_id "MSTRG.2633"; exon_number "2";	1	ensembl	exon	180075360	180075471	.	+	.	gene_id "ENSSSCG00000031354"; gene_version "3"; transcript_id "ENSSSCT00000041018"; transcript_version "3"; exon_number "3"; gene_name "DMAC2L"; gene_source "ensembl"; gene_biotype "protein_coding"; transcript_name "DMAC2L-203"; transcript_source "ensembl"; transcript_biotype "protein_coding"; exon_id "ENSSSCE00000336988"; exon_version "1";
1	StringTie	exon	180153304	180153417	.	+	.	transcript_id "MSTRG.2633.2"; gene_id "MSTRG.2633"; exon_number "2";	1	ensembl	CDS	180075365	180075471	.	+	0	gene_id "ENSSSCG00000031354"; gene_version "3"; transcript_id "ENSSSCT00000041018"; transcript_version "3"; exon_number "3"; gene_name "DMAC2L"; gene_source "ensembl"; gene_biotype "protein_coding"; transcript_name "DMAC2L-203"; transcript_source "ensembl"; transcript_biotype "protein_coding"; protein_id "ENSSSCP00000035990"; protein_version "1";
1	StringTie	exon	180153304	180153417	.	+	.	transcript_id "MSTRG.2633.2"; gene_id "MSTRG.2633"; exon_number "2";	1	ensembl	start_codon	180075365	180075367	.	+	0	gene_id "ENSSSCG00000031354"; gene_version "3"; transcript_id "ENSSSCT00000041018"; transcript_version "3"; exon_number "3"; gene_name "DMAC2L"; gene_source "ensembl"; gene_biotype "protein_coding"; transcript_name "DMAC2L-203"; transcript_source "ensembl"; transcript_biotype "protein_coding";
1	StringTie	exon	180153304	180153417	.	+	.	transcript_id "MSTRG.2633.2"; gene_id "MSTRG.2633"; exon_number "2";	1	ensembl	five_prime_utr	180069245	180069307	.	+	.	gene_id "ENSSSCG00000031354"; gene_version "3"; transcript_id "ENSSSCT00000041018"; transcript_version "3"; gene_name "DMAC2L"; gene_source "ensembl"; gene_biotype "protein_coding"; transcript_name "DMAC2L-203"; transcript_source "ensembl"; transcript_biotype "protein_coding";
1	StringTie	exon	180153304	180153417	.	+	.	transcript_id "MSTRG.2633.2"; gene_id "MSTRG.2633"; exon_number "2";	1	ensembl	five_prime_utr	180075048	180075241	.	+	.	gene_id "ENSSSCG00000031354"; gene_version "3"; transcript_id "ENSSSCT00000041018"; transcript_version "3"; gene_name "DMAC2L"; gene_source "ensembl"; gene_biotype "protein_coding"; transcript_name "DMAC2L-203"; transcript_source "ensembl"; transcript_biotype "protein_coding";
1	StringTie	exon	180153304	180153417	.	+	.	transcript_id "MSTRG.2633.2"; gene_id "MSTRG.2633"; exon_number "2";	1	ensembl	five_prime_utr	180075360	180075364	.	+	.	gene_id "ENSSSCG00000031354"; gene_version "3"; transcript_id "ENSSSCT00000041018"; transcript_version "3"; gene_name "DMAC2L"; gene_source "ensembl"; gene_biotype "protein_coding"; transcript_name "DMAC2L-203"; transcript_source "ensembl"; transcript_biotype "protein_coding";
1	StringTie	exon	180153304	180153417	.	+	.	transcript_id "MSTRG.2633.2"; gene_id "MSTRG.2633"; exon_number "2";	1	ensembl	exon	180068973	180069307	.	+	.	gene_id "ENSSSCG00000031354"; gene_version "3"; transcript_id "ENSSSCT00000039137"; transcript_version "2"; exon_number "1"; gene_name "DMAC2L"; gene_source "ensembl"; gene_biotype "protein_coding"; transcript_name "DMAC2L-204"; transcript_source "ensembl"; transcript_biotype "protein_coding"; exon_id "ENSSSCE00000269865"; exon_version "2";
1	StringTie	exon	180153304	180153417	.	+	.	transcript_id "MSTRG.2633.2"; gene_id "MSTRG.2633"; exon_number "2";	1	ensembl	CDS	180069172	180069307	.	+	0	gene_id "ENSSSCG00000031354"; gene_version "3"; transcript_id "ENSSSCT00000039137"; transcript_version "2"; exon_number "1"; gene_name "DMAC2L"; gene_source "ensembl"; gene_biotype "protein_coding"; transcript_name "DMAC2L-204"; transcript_source "ensembl"; transcript_biotype "protein_coding"; protein_id "ENSSSCP00000034229"; protein_version "1";
1	StringTie	exon	180153304	180153417	.	+	.	transcript_id "MSTRG.2633.2"; gene_id "MSTRG.2633"; exon_number "2";	1	ensembl	start_codon	180069172	180069174	.	+	0	gene_id "ENSSSCG00000031354"; gene_version "3"; transcript_id "ENSSSCT00000039137"; transcript_version "2"; exon_number "1"; gene_name "DMAC2L"; gene_source "ensembl"; gene_biotype "protein_coding"; transcript_name "DMAC2L-204"; transcript_source "ensembl"; transcript_biotype "protein_coding";
1	StringTie	exon	180153304	180153417	.	+	.	transcript_id "MSTRG.2633.2"; gene_id "MSTRG.2633"; exon_number "2";	1	ensembl	exon	180075360	180075471	.	+	.	gene_id "ENSSSCG00000031354"; gene_version "3"; transcript_id "ENSSSCT00000039137"; transcript_version "2"; exon_number "2"; gene_name "DMAC2L"; gene_source "ensembl"; gene_biotype "protein_coding"; transcript_name "DMAC2L-204"; transcript_source "ensembl"; transcript_biotype "protein_coding"; exon_id "ENSSSCE00000291804"; exon_version "1";
1	StringTie	exon	180153304	180153417	.	+	.	transcript_id "MSTRG.2633.2"; gene_id "MSTRG.2633"; exon_number "2";	1	ensembl	CDS	180075360	180075471	.	+	2	gene_id "ENSSSCG00000031354"; gene_version "3"; transcript_id "ENSSSCT00000039137"; transcript_version "2"; exon_number "2"; gene_name "DMAC2L"; gene_source "ensembl"; gene_biotype "protein_coding"; transcript_name "DMAC2L-204"; transcript_source "ensembl"; transcript_biotype "protein_coding"; protein_id "ENSSSCP00000034229"; protein_version "1";
1	StringTie	exon	180153304	180153417	.	+	.	transcript_id "MSTRG.2633.2"; gene_id "MSTRG.2633"; exon_number "2";	1	ensembl	five_prime_utr	180068973	180069171	.	+	.	gene_id "ENSSSCG00000031354"; gene_version "3"; transcript_id "ENSSSCT00000039137"; transcript_version "2"; gene_name "DMAC2L"; gene_source "ensembl"; gene_biotype "protein_coding"; transcript_name "DMAC2L-204"; transcript_source "ensembl"; transcript_biotype "protein_coding";
1	StringTie	exon	180153304	180153417	.	+	.	transcript_id "MSTRG.2633.2"; gene_id "MSTRG.2633"; exon_number "2";	1	ensembl	exon	180076632	180076854	.	+	.	gene_id "ENSSSCG00000031354"; gene_version "3"; transcript_id "ENSSSCT00000094980"; transcript_version "1"; exon_number "4"; gene_name "DMAC2L"; gene_source "ensembl"; gene_biotype "protein_coding"; transcript_name "DMAC2L-201"; transcript_source "ensembl"; transcript_biotype "protein_coding"; exon_id "ENSSSCE00000511578"; exon_version "1";
1	StringTie	exon	180153304	180153417	.	+	.	transcript_id "MSTRG.2633.2"; gene_id "MSTRG.2633"; exon_number "2";	1	ensembl	CDS	180076632	180076854	.	+	1	gene_id "ENSSSCG00000031354"; gene_version "3"; transcript_id "ENSSSCT00000094980"; transcript_version "1"; exon_number "4"; gene_name "DMAC2L"; gene_source "ensembl"; gene_biotype "protein_coding"; transcript_name "DMAC2L-201"; transcript_source "ensembl"; transcript_biotype "protein_coding"; protein_id "ENSSSCP00000080422"; protein_version "1";
1	StringTie	exon	180153304	180153417	.	+	.	transcript_id "MSTRG.2633.2"; gene_id "MSTRG.2633"; exon_number "2";	1	ensembl	exon	180076857	180076859	.	+	.	gene_id "ENSSSCG00000031354"; gene_version "3"; transcript_id "ENSSSCT00000094980"; transcript_version "1"; exon_number "5"; gene_name "DMAC2L"; gene_source "ensembl"; gene_biotype "protein_coding"; transcript_name "DMAC2L-201"; transcript_source "ensembl"; transcript_biotype "protein_coding"; exon_id "ENSSSCE00000526550"; exon_version "1";
1	StringTie	exon	180153304	180153417	.	+	.	transcript_id "MSTRG.2633.2"; gene_id "MSTRG.2633"; exon_number "2";	1	ensembl	CDS	180076857	180076859	.	+	0	gene_id "ENSSSCG00000031354"; gene_version "3"; transcript_id "ENSSSCT00000094980"; transcript_version "1"; exon_number "5"; gene_name "DMAC2L"; gene_source "ensembl"; gene_biotype "protein_coding"; transcript_name "DMAC2L-201"; transcript_source "ensembl"; transcript_biotype "protein_coding"; protein_id "ENSSSCP00000080422"; protein_version "1";
1	StringTie	exon	180153304	180153417	.	+	.	transcript_id "MSTRG.2633.2"; gene_id "MSTRG.2633"; exon_number "2";	1	ensembl	exon	180076862	180076888	.	+	.	gene_id "ENSSSCG00000031354"; gene_version "3"; transcript_id "ENSSSCT00000094980"; transcript_version "1"; exon_number "6"; gene_name "DMAC2L"; gene_source "ensembl"; gene_biotype "protein_coding"; transcript_name "DMAC2L-201"; transcript_source "ensembl"; transcript_biotype "protein_coding"; exon_id "ENSSSCE00000490279"; exon_version "1";
1	StringTie	exon	180153304	180153417	.	+	.	transcript_id "MSTRG.2633.2"; gene_id "MSTRG.2633"; exon_number "2";	1	ensembl	CDS	180076862	180076885	.	+	0	gene_id "ENSSSCG00000031354"; gene_version "3"; transcript_id "ENSSSCT00000094980"; transcript_version "1"; exon_number "6"; gene_name "DMAC2L"; gene_source "ensembl"; gene_biotype "protein_coding"; transcript_name "DMAC2L-201"; transcript_source "ensembl"; transcript_biotype "protein_coding"; protein_id "ENSSSCP00000080422"; protein_version "1";
1	StringTie	exon	180153304	180153417	.	+	.	transcript_id "MSTRG.2633.2"; gene_id "MSTRG.2633"; exon_number "2";	1	ensembl	stop_codon	180076886	180076888	.	+	0	gene_id "ENSSSCG00000031354"; gene_version "3"; transcript_id "ENSSSCT00000094980"; transcript_version "1"; exon_number "6"; gene_name "DMAC2L"; gene_source "ensembl"; gene_biotype "protein_coding"; transcript_name "DMAC2L-201"; transcript_source "ensembl"; transcript_biotype "protein_coding";
1	StringTie	exon	180153304	180153417	.	+	.	transcript_id "MSTRG.2633.2"; gene_id "MSTRG.2633"; exon_number "2";	1	ensembl	exon	180076632	180076840	.	+	.	gene_id "ENSSSCG00000031354"; gene_version "3"; transcript_id "ENSSSCT00000094790"; transcript_version "1"; exon_number "4"; gene_name "DMAC2L"; gene_source "ensembl"; gene_biotype "protein_coding"; transcript_name "DMAC2L-202"; transcript_source "ensembl"; transcript_biotype "protein_coding"; exon_id "ENSSSCE00000043023"; exon_version "1";
1	StringTie	exon	180153304	180153417	.	+	.	transcript_id "MSTRG.2633.2"; gene_id "MSTRG.2633"; exon_number "2";	1	ensembl	CDS	180076632	180076840	.	+	1	gene_id "ENSSSCG00000031354"; gene_version "3"; transcript_id "ENSSSCT00000094790"; transcript_version "1"; exon_number "4"; gene_name "DMAC2L"; gene_source "ensembl"; gene_biotype "protein_coding"; transcript_name "DMAC2L-202"; transcript_source "ensembl"; transcript_biotype "protein_coding"; protein_id "ENSSSCP00000075286"; protein_version "1";
1	StringTie	exon	180153304	180153417	.	+	.	transcript_id "MSTRG.2633.2"; gene_id "MSTRG.2633"; exon_number "2";	1	ensembl	exon	180079861	180079883	.	+	.	gene_id "ENSSSCG00000031354"; gene_version "3"; transcript_id "ENSSSCT00000094790"; transcript_version "1"; exon_number "5"; gene_name "DMAC2L"; gene_source "ensembl"; gene_biotype "protein_coding"; transcript_name "DMAC2L-202"; transcript_source "ensembl"; transcript_biotype "protein_coding"; exon_id "ENSSSCE00000515042"; exon_version "1";
1	StringTie	exon	180153304	180153417	.	+	.	transcript_id "MSTRG.2633.2"; gene_id "MSTRG.2633"; exon_number "2";	1	ensembl	CDS	180079861	180079880	.	+	2	gene_id "ENSSSCG00000031354"; gene_version "3"; transcript_id "ENSSSCT00000094790"; transcript_version "1"; exon_number "5"; gene_name "DMAC2L"; gene_source "ensembl"; gene_biotype "protein_coding"; transcript_name "DMAC2L-202"; transcript_source "ensembl"; transcript_biotype "protein_coding"; protein_id "ENSSSCP00000075286"; protein_version "1";
1	StringTie	exon	180153304	180153417	.	+	.	transcript_id "MSTRG.2633.2"; gene_id "MSTRG.2633"; exon_number "2";	1	ensembl	stop_codon	180079881	180079883	.	+	0	gene_id "ENSSSCG00000031354"; gene_version "3"; transcript_id "ENSSSCT00000094790"; transcript_version "1"; exon_number "5"; gene_name "DMAC2L"; gene_source "ensembl"; gene_biotype "protein_coding"; transcript_name "DMAC2L-202"; transcript_source "ensembl"; transcript_biotype "protein_coding";
1	StringTie	exon	180153304	180153417	.	+	.	transcript_id "MSTRG.2633.2"; gene_id "MSTRG.2633"; exon_number "2";	1	ensembl	exon	180076632	180076840	.	+	.	gene_id "ENSSSCG00000031354"; gene_version "3"; transcript_id "ENSSSCT00000041018"; transcript_version "3"; exon_number "4"; gene_name "DMAC2L"; gene_source "ensembl"; gene_biotype "protein_coding"; transcript_name "DMAC2L-203"; transcript_source "ensembl"; transcript_biotype "protein_coding"; exon_id "ENSSSCE00000043023"; exon_version "1";
1	StringTie	exon	180153304	180153417	.	+	.	transcript_id "MSTRG.2633.2"; gene_id "MSTRG.2633"; exon_number "2";	1	ensembl	CDS	180076632	180076840	.	+	1	gene_id "ENSSSCG00000031354"; gene_version "3"; transcript_id "ENSSSCT00000041018"; transcript_version "3"; exon_number "4"; gene_name "DMAC2L"; gene_source "ensembl"; gene_biotype "protein_coding"; transcript_name "DMAC2L-203"; transcript_source "ensembl"; transcript_biotype "protein_coding"; protein_id "ENSSSCP00000035990"; protein_version "1";
1	StringTie	exon	180153304	180153417	.	+	.	transcript_id "MSTRG.2633.2"; gene_id "MSTRG.2633"; exon_number "2";	1	ensembl	exon	180077400	180077571	.	+	.	gene_id "ENSSSCG00000031354"; gene_version "3"; transcript_id "ENSSSCT00000041018"; transcript_version "3"; exon_number "5"; gene_name "DMAC2L"; gene_source "ensembl"; gene_biotype "protein_coding"; transcript_name "DMAC2L-203"; transcript_source "ensembl"; transcript_biotype "protein_coding"; exon_id "ENSSSCE00000043024"; exon_version "1";
1	StringTie	exon	180153304	180153417	.	+	.	transcript_id "MSTRG.2633.2"; gene_id "MSTRG.2633"; exon_number "2";	1	ensembl	CDS	180077400	180077571	.	+	2	gene_id "ENSSSCG00000031354"; gene_version "3"; transcript_id "ENSSSCT00000041018"; transcript_version "3"; exon_number "5"; gene_name "DMAC2L"; gene_source "ensembl"; gene_biotype "protein_coding"; transcript_name "DMAC2L-203"; transcript_source "ensembl"; transcript_biotype "protein_coding"; protein_id "ENSSSCP00000035990"; protein_version "1";
1	StringTie	exon	180153304	180153417	.	+	.	transcript_id "MSTRG.2633.2"; gene_id "MSTRG.2633"; exon_number "2";	1	ensembl	exon	180079861	180081404	.	+	.	gene_id "ENSSSCG00000031354"; gene_version "3"; transcript_id "ENSSSCT00000041018"; transcript_version "3"; exon_number "6"; gene_name "DMAC2L"; gene_source "ensembl"; gene_biotype "protein_coding"; transcript_name "DMAC2L-203"; transcript_source "ensembl"; transcript_biotype "protein_coding"; exon_id "ENSSSCE00000285039"; exon_version "3";
1	StringTie	exon	180153304	180153417	.	+	.	transcript_id "MSTRG.2633.2"; gene_id "MSTRG.2633"; exon_number "2";	1	ensembl	CDS	180079861	180079972	.	+	1	gene_id "ENSSSCG00000031354"; gene_version "3"; transcript_id "ENSSSCT00000041018"; transcript_version "3"; exon_number "6"; gene_name "DMAC2L"; gene_source "ensembl"; gene_biotype "protein_coding"; transcript_name "DMAC2L-203"; transcript_source "ensembl"; transcript_biotype "protein_coding"; protein_id "ENSSSCP00000035990"; protein_version "1";
1	StringTie	exon	180153304	180153417	.	+	.	transcript_id "MSTRG.2633.2"; gene_id "MSTRG.2633"; exon_number "2";	1	ensembl	stop_codon	180079973	180079975	.	+	0	gene_id "ENSSSCG00000031354"; gene_version "3"; transcript_id "ENSSSCT00000041018"; transcript_version "3"; exon_number "6"; gene_name "DMAC2L"; gene_source "ensembl"; gene_biotype "protein_coding"; transcript_name "DMAC2L-203"; transcript_source "ensembl"; transcript_biotype "protein_coding";
1	StringTie	exon	180153304	180153417	.	+	.	transcript_id "MSTRG.2633.2"; gene_id "MSTRG.2633"; exon_number "2";	1	ensembl	three_prime_utr	180079976	180081404	.	+	.	gene_id "ENSSSCG00000031354"; gene_version "3"; transcript_id "ENSSSCT00000041018"; transcript_version "3"; gene_name "DMAC2L"; gene_source "ensembl"; gene_biotype "protein_coding"; transcript_name "DMAC2L-203"; transcript_source "ensembl"; transcript_biotype "protein_coding";
1	StringTie	exon	180153304	180153417	.	+	.	transcript_id "MSTRG.2633.2"; gene_id "MSTRG.2633"; exon_number "2";	1	ensembl	exon	180076632	180076840	.	+	.	gene_id "ENSSSCG00000031354"; gene_version "3"; transcript_id "ENSSSCT00000039137"; transcript_version "2"; exon_number "3"; gene_name "DMAC2L"; gene_source "ensembl"; gene_biotype "protein_coding"; transcript_name "DMAC2L-204"; transcript_source "ensembl"; transcript_biotype "protein_coding"; exon_id "ENSSSCE00000043023"; exon_version "1";
1	StringTie	exon	180153304	180153417	.	+	.	transcript_id "MSTRG.2633.2"; gene_id "MSTRG.2633"; exon_number "2";	1	ensembl	CDS	180076632	180076840	.	+	1	gene_id "ENSSSCG00000031354"; gene_version "3"; transcript_id "ENSSSCT00000039137"; transcript_version "2"; exon_number "3"; gene_name "DMAC2L"; gene_source "ensembl"; gene_biotype "protein_coding"; transcript_name "DMAC2L-204"; transcript_source "ensembl"; transcript_biotype "protein_coding"; protein_id "ENSSSCP00000034229"; protein_version "1";
1	StringTie	exon	180153304	180153417	.	+	.	transcript_id "MSTRG.2633.2"; gene_id "MSTRG.2633"; exon_number "2";	1	ensembl	exon	180077400	180077571	.	+	.	gene_id "ENSSSCG00000031354"; gene_version "3"; transcript_id "ENSSSCT00000039137"; transcript_version "2"; exon_number "4"; gene_name "DMAC2L"; gene_source "ensembl"; gene_biotype "protein_coding"; transcript_name "DMAC2L-204"; transcript_source "ensembl"; transcript_biotype "protein_coding"; exon_id "ENSSSCE00000043024"; exon_version "1";
1	StringTie	exon	180153304	180153417	.	+	.	transcript_id "MSTRG.2633.2"; gene_id "MSTRG.2633"; exon_number "2";	1	ensembl	CDS	180077400	180077571	.	+	2	gene_id "ENSSSCG00000031354"; gene_version "3"; transcript_id "ENSSSCT00000039137"; transcript_version "2"; exon_number "4"; gene_name "DMAC2L"; gene_source "ensembl"; gene_biotype "protein_coding"; transcript_name "DMAC2L-204"; transcript_source "ensembl"; transcript_biotype "protein_coding"; protein_id "ENSSSCP00000034229"; protein_version "1";
1	StringTie	exon	180153304	180153417	.	+	.	transcript_id "MSTRG.2633.2"; gene_id "MSTRG.2633"; exon_number "2";	1	ensembl	exon	180079861	180081412	.	+	.	gene_id "ENSSSCG00000031354"; gene_version "3"; transcript_id "ENSSSCT00000039137"; transcript_version "2"; exon_number "5"; gene_name "DMAC2L"; gene_source "ensembl"; gene_biotype "protein_coding"; transcript_name "DMAC2L-204"; transcript_source "ensembl"; transcript_biotype "protein_coding"; exon_id "ENSSSCE00000294769"; exon_version "1";
1	StringTie	exon	180153304	180153417	.	+	.	transcript_id "MSTRG.2633.2"; gene_id "MSTRG.2633"; exon_number "2";	1	ensembl	CDS	180079861	180079972	.	+	1	gene_id "ENSSSCG00000031354"; gene_version "3"; transcript_id "ENSSSCT00000039137"; transcript_version "2"; exon_number "5"; gene_name "DMAC2L"; gene_source "ensembl"; gene_biotype "protein_coding"; transcript_name "DMAC2L-204"; transcript_source "ensembl"; transcript_biotype "protein_coding"; protein_id "ENSSSCP00000034229"; protein_version "1";
1	StringTie	exon	180153304	180153417	.	+	.	transcript_id "MSTRG.2633.2"; gene_id "MSTRG.2633"; exon_number "2";	1	ensembl	stop_codon	180079973	180079975	.	+	0	gene_id "ENSSSCG00000031354"; gene_version "3"; transcript_id "ENSSSCT00000039137"; transcript_version "2"; exon_number "5"; gene_name "DMAC2L"; gene_source "ensembl"; gene_biotype "protein_coding"; transcript_name "DMAC2L-204"; transcript_source "ensembl"; transcript_biotype "protein_coding";
1	StringTie	exon	180153304	180153417	.	+	.	transcript_id "MSTRG.2633.2"; gene_id "MSTRG.2633"; exon_number "2";	1	ensembl	three_prime_utr	180079976	180081412	.	+	.	gene_id "ENSSSCG00000031354"; gene_version "3"; transcript_id "ENSSSCT00000039137"; transcript_version "2"; gene_name "DMAC2L"; gene_source "ensembl"; gene_biotype "protein_coding"; transcript_name "DMAC2L-204"; transcript_source "ensembl"; transcript_biotype "protein_coding";
1	StringTie	exon	180153304	180153417	.	+	.	transcript_id "MSTRG.2633.2"; gene_id "MSTRG.2633"; exon_number "2";	1	ensembl	exon	180090603	180090685	.	-	.	gene_id "ENSSSCG00000034516"; gene_version "3"; transcript_id "ENSSSCT00000078310"; transcript_version "2"; exon_number "7"; gene_name "CDKL1"; gene_source "ensembl"; gene_biotype "protein_coding"; transcript_name "CDKL1-201"; transcript_source "ensembl"; transcript_biotype "protein_coding"; exon_id "ENSSSCE00000043029"; exon_version "1";
1	StringTie	exon	180153304	180153417	.	+	.	transcript_id "MSTRG.2633.2"; gene_id "MSTRG.2633"; exon_number "2";	1	ensembl	CDS	180090603	180090685	.	-	2	gene_id "ENSSSCG00000034516"; gene_version "3"; transcript_id "ENSSSCT00000078310"; transcript_version "2"; exon_number "7"; gene_name "CDKL1"; gene_source "ensembl"; gene_biotype "protein_coding"; transcript_name "CDKL1-201"; transcript_source "ensembl"; transcript_biotype "protein_coding"; protein_id "ENSSSCP00000069969"; protein_version "1";
1	StringTie	exon	180153304	180153417	.	+	.	transcript_id "MSTRG.2633.2"; gene_id "MSTRG.2633"; exon_number "2";	1	ensembl	exon	180087569	180087625	.	-	.	gene_id "ENSSSCG00000034516"; gene_version "3"; transcript_id "ENSSSCT00000078310"; transcript_version "2"; exon_number "8"; gene_name "CDKL1"; gene_source "ensembl"; gene_biotype "protein_coding"; transcript_name "CDKL1-201"; transcript_source "ensembl"; transcript_biotype "protein_coding"; exon_id "ENSSSCE00000043030"; exon_version "1";
1	StringTie	exon	180153304	180153417	.	+	.	transcript_id "MSTRG.2633.2"; gene_id "MSTRG.2633"; exon_number "2";	1	ensembl	CDS	180087569	180087625	.	-	0	gene_id "ENSSSCG00000034516"; gene_version "3"; transcript_id "ENSSSCT00000078310"; transcript_version "2"; exon_number "8"; gene_name "CDKL1"; gene_source "ensembl"; gene_biotype "protein_coding"; transcript_name "CDKL1-201"; transcript_source "ensembl"; transcript_biotype "protein_coding"; protein_id "ENSSSCP00000069969"; protein_version "1";
1	StringTie	exon	180153304	180153417	.	+	.	transcript_id "MSTRG.2633.2"; gene_id "MSTRG.2633"; exon_number "2";	1	ensembl	exon	180086641	180086649	.	-	.	gene_id "ENSSSCG00000034516"; gene_version "3"; transcript_id "ENSSSCT00000078310"; transcript_version "2"; exon_number "9"; gene_name "CDKL1"; gene_source "ensembl"; gene_biotype "protein_coding"; transcript_name "CDKL1-201"; transcript_source "ensembl"; transcript_biotype "protein_coding"; exon_id "ENSSSCE00000491868"; exon_version "1";
1	StringTie	exon	180153304	180153417	.	+	.	transcript_id "MSTRG.2633.2"; gene_id "MSTRG.2633"; exon_number "2";	1	ensembl	CDS	180086641	180086649	.	-	0	gene_id "ENSSSCG00000034516"; gene_version "3"; transcript_id "ENSSSCT00000078310"; transcript_version "2"; exon_number "9"; gene_name "CDKL1"; gene_source "ensembl"; gene_biotype "protein_coding"; transcript_name "CDKL1-201"; transcript_source "ensembl"; transcript_biotype "protein_coding"; protein_id "ENSSSCP00000069969"; protein_version "1";
1	StringTie	exon	180153304	180153417	.	+	.	transcript_id "MSTRG.2633.2"; gene_id "MSTRG.2633"; exon_number "2";	1	ensembl	exon	180086618	180086638	.	-	.	gene_id "ENSSSCG00000034516"; gene_version "3"; transcript_id "ENSSSCT00000078310"; transcript_version "2"; exon_number "10"; gene_name "CDKL1"; gene_source "ensembl"; gene_biotype "protein_coding"; transcript_name "CDKL1-201"; transcript_source "ensembl"; transcript_biotype "protein_coding"; exon_id "ENSSSCE00000419092"; exon_version "1";
1	StringTie	exon	180153304	180153417	.	+	.	transcript_id "MSTRG.2633.2"; gene_id "MSTRG.2633"; exon_number "2";	1	ensembl	CDS	180086618	180086638	.	-	0	gene_id "ENSSSCG00000034516"; gene_version "3"; transcript_id "ENSSSCT00000078310"; transcript_version "2"; exon_number "10"; gene_name "CDKL1"; gene_source "ensembl"; gene_biotype "protein_coding"; transcript_name "CDKL1-201"; transcript_source "ensembl"; transcript_biotype "protein_coding"; protein_id "ENSSSCP00000069969"; protein_version "1";
1	StringTie	exon	180153304	180153417	.	+	.	transcript_id "MSTRG.2633.2"; gene_id "MSTRG.2633"; exon_number "2";	1	ensembl	exon	180090603	180090685	.	-	.	gene_id "ENSSSCG00000034516"; gene_version "3"; transcript_id "ENSSSCT00000075014"; transcript_version "2"; exon_number "7"; gene_name "CDKL1"; gene_source "ensembl"; gene_biotype "protein_coding"; transcript_name "CDKL1-202"; transcript_source "ensembl"; transcript_biotype "protein_coding"; exon_id "ENSSSCE00000043029"; exon_version "1";
1	StringTie	exon	180153304	180153417	.	+	.	transcript_id "MSTRG.2633.2"; gene_id "MSTRG.2633"; exon_number "2";	1	ensembl	CDS	180090603	180090685	.	-	2	gene_id "ENSSSCG00000034516"; gene_version "3"; transcript_id "ENSSSCT00000075014"; transcript_version "2"; exon_number "7"; gene_name "CDKL1"; gene_source "ensembl"; gene_biotype "protein_coding"; transcript_name "CDKL1-202"; transcript_source "ensembl"; transcript_biotype "protein_coding"; protein_id "ENSSSCP00000071907"; protein_version "2";
1	StringTie	exon	180153304	180153417	.	+	.	transcript_id "MSTRG.2633.2"; gene_id "MSTRG.2633"; exon_number "2";	1	ensembl	exon	180087569	180087625	.	-	.	gene_id "ENSSSCG00000034516"; gene_version "3"; transcript_id "ENSSSCT00000075014"; transcript_version "2"; exon_number "8"; gene_name "CDKL1"; gene_source "ensembl"; gene_biotype "protein_coding"; transcript_name "CDKL1-202"; transcript_source "ensembl"; transcript_biotype "protein_coding"; exon_id "ENSSSCE00000043030"; exon_version "1";
1	StringTie	exon	180153304	180153417	.	+	.	transcript_id "MSTRG.2633.2"; gene_id "MSTRG.2633"; exon_number "2";	1	ensembl	CDS	180087569	180087625	.	-	0	gene_id "ENSSSCG00000034516"; gene_version "3"; transcript_id "ENSSSCT00000075014"; transcript_version "2"; exon_number "8"; gene_name "CDKL1"; gene_source "ensembl"; gene_biotype "protein_coding"; transcript_name "CDKL1-202"; transcript_source "ensembl"; transcript_biotype "protein_coding"; protein_id "ENSSSCP00000071907"; protein_version "2";
1	StringTie	exon	180153304	180153417	.	+	.	transcript_id "MSTRG.2633.2"; gene_id "MSTRG.2633"; exon_number "2";	1	ensembl	exon	180086222	180086369	.	-	.	gene_id "ENSSSCG00000034516"; gene_version "3"; transcript_id "ENSSSCT00000075014"; transcript_version "2"; exon_number "9"; gene_name "CDKL1"; gene_source "ensembl"; gene_biotype "protein_coding"; transcript_name "CDKL1-202"; transcript_source "ensembl"; transcript_biotype "protein_coding"; exon_id "ENSSSCE00000414812"; exon_version "2";
1	StringTie	exon	180153304	180153417	.	+	.	transcript_id "MSTRG.2633.2"; gene_id "MSTRG.2633"; exon_number "2";	1	ensembl	CDS	180086222	180086369	.	-	0	gene_id "ENSSSCG00000034516"; gene_version "3"; transcript_id "ENSSSCT00000075014"; transcript_version "2"; exon_number "9"; gene_name "CDKL1"; gene_source "ensembl"; gene_biotype "protein_coding"; transcript_name "CDKL1-202"; transcript_source "ensembl"; transcript_biotype "protein_coding"; protein_id "ENSSSCP00000071907"; protein_version "2";
1	StringTie	exon	180153304	180153417	.	+	.	transcript_id "MSTRG.2633.2"; gene_id "MSTRG.2633"; exon_number "2";	1	ensembl	exon	180086178	180086200	.	-	.	gene_id "ENSSSCG00000034516"; gene_version "3"; transcript_id "ENSSSCT00000075014"; transcript_version "2"; exon_number "10"; gene_name "CDKL1"; gene_source "ensembl"; gene_biotype "protein_coding"; transcript_name "CDKL1-202"; transcript_source "ensembl"; transcript_biotype "protein_coding"; exon_id "ENSSSCE00000429433"; exon_version "2";
1	StringTie	exon	180153304	180153417	.	+	.	transcript_id "MSTRG.2633.2"; gene_id "MSTRG.2633"; exon_number "2";	1	ensembl	CDS	180086178	180086200	.	-	2	gene_id "ENSSSCG00000034516"; gene_version "3"; transcript_id "ENSSSCT00000075014"; transcript_version "2"; exon_number "10"; gene_name "CDKL1"; gene_source "ensembl"; gene_biotype "protein_coding"; transcript_name "CDKL1-202"; transcript_source "ensembl"; transcript_biotype "protein_coding"; protein_id "ENSSSCP00000071907"; protein_version "2";
1	StringTie	exon	180153304	180153417	.	+	.	transcript_id "MSTRG.2633.2"; gene_id "MSTRG.2633"; exon_number "2";	1	ensembl	exon	180084102	180084209	.	-	.	gene_id "ENSSSCG00000034516"; gene_version "3"; transcript_id "ENSSSCT00000075014"; transcript_version "2"; exon_number "11"; gene_name "CDKL1"; gene_source "ensembl"; gene_biotype "protein_coding"; transcript_name "CDKL1-202"; transcript_source "ensembl"; transcript_biotype "protein_coding"; exon_id "ENSSSCE00000409717"; exon_version "1";
1	StringTie	exon	180153304	180153417	.	+	.	transcript_id "MSTRG.2633.2"; gene_id "MSTRG.2633"; exon_number "2";	1	ensembl	CDS	180084105	180084209	.	-	0	gene_id "ENSSSCG00000034516"; gene_version "3"; transcript_id "ENSSSCT00000075014"; transcript_version "2"; exon_number "11"; gene_name "CDKL1"; gene_source "ensembl"; gene_biotype "protein_coding"; transcript_name "CDKL1-202"; transcript_source "ensembl"; transcript_biotype "protein_coding"; protein_id "ENSSSCP00000071907"; protein_version "2";
1	StringTie	exon	180153304	180153417	.	+	.	transcript_id "MSTRG.2633.2"; gene_id "MSTRG.2633"; exon_number "2";	1	ensembl	stop_codon	180084102	180084104	.	-	0	gene_id "ENSSSCG00000034516"; gene_version "3"; transcript_id "ENSSSCT00000075014"; transcript_version "2"; exon_number "11"; gene_name "CDKL1"; gene_source "ensembl"; gene_biotype "protein_coding"; transcript_name "CDKL1-202"; transcript_source "ensembl"; transcript_biotype "protein_coding";
1	StringTie	exon	180153304	180153417	.	+	.	transcript_id "MSTRG.2633.2"; gene_id "MSTRG.2633"; exon_number "2";	1	ensembl	exon	180090603	180090685	.	-	.	gene_id "ENSSSCG00000034516"; gene_version "3"; transcript_id "ENSSSCT00000061065"; transcript_version "2"; exon_number "7"; gene_name "CDKL1"; gene_source "ensembl"; gene_biotype "protein_coding"; transcript_name "CDKL1-203"; transcript_source "ensembl"; transcript_biotype "protein_coding"; exon_id "ENSSSCE00000043029"; exon_version "1";
1	StringTie	exon	180153304	180153417	.	+	.	transcript_id "MSTRG.2633.2"; gene_id "MSTRG.2633"; exon_number "2";	1	ensembl	CDS	180090603	180090685	.	-	2	gene_id "ENSSSCG00000034516"; gene_version "3"; transcript_id "ENSSSCT00000061065"; transcript_version "2"; exon_number "7"; gene_name "CDKL1"; gene_source "ensembl"; gene_biotype "protein_coding"; transcript_name "CDKL1-203"; transcript_source "ensembl"; transcript_biotype "protein_coding"; protein_id "ENSSSCP00000036467"; protein_version "1";
1	StringTie	exon	180153304	180153417	.	+	.	transcript_id "MSTRG.2633.2"; gene_id "MSTRG.2633"; exon_number "2";	1	ensembl	exon	180087569	180087625	.	-	.	gene_id "ENSSSCG00000034516"; gene_version "3"; transcript_id "ENSSSCT00000061065"; transcript_version "2"; exon_number "8"; gene_name "CDKL1"; gene_source "ensembl"; gene_biotype "protein_coding"; transcript_name "CDKL1-203"; transcript_source "ensembl"; transcript_biotype "protein_coding"; exon_id "ENSSSCE00000043030"; exon_version "1";
1	StringTie	exon	180153304	180153417	.	+	.	transcript_id "MSTRG.2633.2"; gene_id "MSTRG.2633"; exon_number "2";	1	ensembl	CDS	180087569	180087625	.	-	0	gene_id "ENSSSCG00000034516"; gene_version "3"; transcript_id "ENSSSCT00000061065"; transcript_version "2"; exon_number "8"; gene_name "CDKL1"; gene_source "ensembl"; gene_biotype "protein_coding"; transcript_name "CDKL1-203"; transcript_source "ensembl"; transcript_biotype "protein_coding"; protein_id "ENSSSCP00000036467"; protein_version "1";
1	StringTie	exon	180153304	180153417	.	+	.	transcript_id "MSTRG.2633.2"; gene_id "MSTRG.2633"; exon_number "2";	1	ensembl	exon	180086214	180086369	.	-	.	gene_id "ENSSSCG00000034516"; gene_version "3"; transcript_id "ENSSSCT00000061065"; transcript_version "2"; exon_number "9"; gene_name "CDKL1"; gene_source "ensembl"; gene_biotype "protein_coding"; transcript_name "CDKL1-203"; transcript_source "ensembl"; transcript_biotype "protein_coding"; exon_id "ENSSSCE00000043031"; exon_version "1";
1	StringTie	exon	180153304	180153417	.	+	.	transcript_id "MSTRG.2633.2"; gene_id "MSTRG.2633"; exon_number "2";	1	ensembl	CDS	180086214	180086369	.	-	0	gene_id "ENSSSCG00000034516"; gene_version "3"; transcript_id "ENSSSCT00000061065"; transcript_version "2"; exon_number "9"; gene_name "CDKL1"; gene_source "ensembl"; gene_biotype "protein_coding"; transcript_name "CDKL1-203"; transcript_source "ensembl"; transcript_biotype "protein_coding"; protein_id "ENSSSCP00000036467"; protein_version "1";
1	StringTie	exon	180153304	180153417	.	+	.	transcript_id "MSTRG.2633.2"; gene_id "MSTRG.2633"; exon_number "2";	1	ensembl	exon	180079859	180084209	.	-	.	gene_id "ENSSSCG00000034516"; gene_version "3"; transcript_id "ENSSSCT00000061065"; transcript_version "2"; exon_number "10"; gene_name "CDKL1"; gene_source "ensembl"; gene_biotype "protein_coding"; transcript_name "CDKL1-203"; transcript_source "ensembl"; transcript_biotype "protein_coding"; exon_id "ENSSSCE00000312854"; exon_version "2";
1	StringTie	exon	180153304	180153417	.	+	.	transcript_id "MSTRG.2633.2"; gene_id "MSTRG.2633"; exon_number "2";	1	ensembl	CDS	180084105	180084209	.	-	0	gene_id "ENSSSCG00000034516"; gene_version "3"; transcript_id "ENSSSCT00000061065"; transcript_version "2"; exon_number "10"; gene_name "CDKL1"; gene_source "ensembl"; gene_biotype "protein_coding"; transcript_name "CDKL1-203"; transcript_source "ensembl"; transcript_biotype "protein_coding"; protein_id "ENSSSCP00000036467"; protein_version "1";
1	StringTie	exon	180153304	180153417	.	+	.	transcript_id "MSTRG.2633.2"; gene_id "MSTRG.2633"; exon_number "2";	1	ensembl	stop_codon	180084102	180084104	.	-	0	gene_id "ENSSSCG00000034516"; gene_version "3"; transcript_id "ENSSSCT00000061065"; transcript_version "2"; exon_number "10"; gene_name "CDKL1"; gene_source "ensembl"; gene_biotype "protein_coding"; transcript_name "CDKL1-203"; transcript_source "ensembl"; transcript_biotype "protein_coding";
1	StringTie	exon	180153304	180153417	.	+	.	transcript_id "MSTRG.2633.2"; gene_id "MSTRG.2633"; exon_number "2";	1	ensembl	exon	180078659	180079747	.	-	.	gene_id "ENSSSCG00000034516"; gene_version "3"; transcript_id "ENSSSCT00000061065"; transcript_version "2"; exon_number "11"; gene_name "CDKL1"; gene_source "ensembl"; gene_biotype "protein_coding"; transcript_name "CDKL1-203"; transcript_source "ensembl"; transcript_biotype "protein_coding"; exon_id "ENSSSCE00000414625"; exon_version "1";
1	StringTie	exon	180153304	180153417	.	+	.	transcript_id "MSTRG.2633.2"; gene_id "MSTRG.2633"; exon_number "2";	1	ensembl	three_prime_utr	180079859	180084101	.	-	.	gene_id "ENSSSCG00000034516"; gene_version "3"; transcript_id "ENSSSCT00000061065"; transcript_version "2"; gene_name "CDKL1"; gene_source "ensembl"; gene_biotype "protein_coding"; transcript_name "CDKL1-203"; transcript_source "ensembl"; transcript_biotype "protein_coding";
1	StringTie	exon	180153304	180153417	.	+	.	transcript_id "MSTRG.2633.2"; gene_id "MSTRG.2633"; exon_number "2";	1	ensembl	three_prime_utr	180078659	180079747	.	-	.	gene_id "ENSSSCG00000034516"; gene_version "3"; transcript_id "ENSSSCT00000061065"; transcript_version "2"; gene_name "CDKL1"; gene_source "ensembl"; gene_biotype "protein_coding"; transcript_name "CDKL1-203"; transcript_source "ensembl"; transcript_biotype "protein_coding";
1	StringTie	exon	180153304	180153417	.	+	.	transcript_id "MSTRG.2633.2"; gene_id "MSTRG.2633"; exon_number "2";	1	ensembl	exon	180097790	180097862	.	-	.	gene_id "ENSSSCG00000034516"; gene_version "3"; transcript_id "ENSSSCT00000078310"; transcript_version "2"; exon_number "4"; gene_name "CDKL1"; gene_source "ensembl"; gene_biotype "protein_coding"; transcript_name "CDKL1-201"; transcript_source "ensembl"; transcript_biotype "protein_coding"; exon_id "ENSSSCE00000043026"; exon_version "2";
1	StringTie	exon	180153304	180153417	.	+	.	transcript_id "MSTRG.2633.2"; gene_id "MSTRG.2633"; exon_number "2";	1	ensembl	CDS	180097790	180097862	.	-	1	gene_id "ENSSSCG00000034516"; gene_version "3"; transcript_id "ENSSSCT00000078310"; transcript_version "2"; exon_number "4"; gene_name "CDKL1"; gene_source "ensembl"; gene_biotype "protein_coding"; transcript_name "CDKL1-201"; transcript_source "ensembl"; transcript_biotype "protein_coding"; protein_id "ENSSSCP00000069969"; protein_version "1";
1	StringTie	exon	180153304	180153417	.	+	.	transcript_id "MSTRG.2633.2"; gene_id "MSTRG.2633"; exon_number "2";	1	ensembl	exon	180095396	180095486	.	-	.	gene_id "ENSSSCG00000034516"; gene_version "3"; transcript_id "ENSSSCT00000078310"; transcript_version "2"; exon_number "5"; gene_name "CDKL1"; gene_source "ensembl"; gene_biotype "protein_coding"; transcript_name "CDKL1-201"; transcript_source "ensembl"; transcript_biotype "protein_coding"; exon_id "ENSSSCE00000043027"; exon_version "1";
1	StringTie	exon	180153304	180153417	.	+	.	transcript_id "MSTRG.2633.2"; gene_id "MSTRG.2633"; exon_number "2";	1	ensembl	CDS	180095396	180095486	.	-	0	gene_id "ENSSSCG00000034516"; gene_version "3"; transcript_id "ENSSSCT00000078310"; transcript_version "2"; exon_number "5"; gene_name "CDKL1"; gene_source "ensembl"; gene_biotype "protein_coding"; transcript_name "CDKL1-201"; transcript_source "ensembl"; transcript_biotype "protein_coding"; protein_id "ENSSSCP00000069969"; protein_version "1";
1	StringTie	exon	180153304	180153417	.	+	.	transcript_id "MSTRG.2633.2"; gene_id "MSTRG.2633"; exon_number "2";	1	ensembl	exon	180097790	180097862	.	-	.	gene_id "ENSSSCG00000034516"; gene_version "3"; transcript_id "ENSSSCT00000075014"; transcript_version "2"; exon_number "4"; gene_name "CDKL1"; gene_source "ensembl"; gene_biotype "protein_coding"; transcript_name "CDKL1-202"; transcript_source "ensembl"; transcript_biotype "protein_coding"; exon_id "ENSSSCE00000043026"; exon_version "2";
1	StringTie	exon	180153304	180153417	.	+	.	transcript_id "MSTRG.2633.2"; gene_id "MSTRG.2633"; exon_number "2";	1	ensembl	CDS	180097790	180097862	.	-	1	gene_id "ENSSSCG00000034516"; gene_version "3"; transcript_id "ENSSSCT00000075014"; transcript_version "2"; exon_number "4"; gene_name "CDKL1"; gene_source "ensembl"; gene_biotype "protein_coding"; transcript_name "CDKL1-202"; transcript_source "ensembl"; transcript_biotype "protein_coding"; protein_id "ENSSSCP00000071907"; protein_version "2";
1	StringTie	exon	180153304	180153417	.	+	.	transcript_id "MSTRG.2633.2"; gene_id "MSTRG.2633"; exon_number "2";	1	ensembl	exon	180095396	180095486	.	-	.	gene_id "ENSSSCG00000034516"; gene_version "3"; transcript_id "ENSSSCT00000075014"; transcript_version "2"; exon_number "5"; gene_name "CDKL1"; gene_source "ensembl"; gene_biotype "protein_coding"; transcript_name "CDKL1-202"; transcript_source "ensembl"; transcript_biotype "protein_coding"; exon_id "ENSSSCE00000043027"; exon_version "1";
1	StringTie	exon	180153304	180153417	.	+	.	transcript_id "MSTRG.2633.2"; gene_id "MSTRG.2633"; exon_number "2";	1	ensembl	CDS	180095396	180095486	.	-	0	gene_id "ENSSSCG00000034516"; gene_version "3"; transcript_id "ENSSSCT00000075014"; transcript_version "2"; exon_number "5"; gene_name "CDKL1"; gene_source "ensembl"; gene_biotype "protein_coding"; transcript_name "CDKL1-202"; transcript_source "ensembl"; transcript_biotype "protein_coding"; protein_id "ENSSSCP00000071907"; protein_version "2";
1	StringTie	exon	180153304	180153417	.	+	.	transcript_id "MSTRG.2633.2"; gene_id "MSTRG.2633"; exon_number "2";	1	ensembl	exon	180097790	180097862	.	-	.	gene_id "ENSSSCG00000034516"; gene_version "3"; transcript_id "ENSSSCT00000061065"; transcript_version "2"; exon_number "4"; gene_name "CDKL1"; gene_source "ensembl"; gene_biotype "protein_coding"; transcript_name "CDKL1-203"; transcript_source "ensembl"; transcript_biotype "protein_coding"; exon_id "ENSSSCE00000043026"; exon_version "2";
1	StringTie	exon	180153304	180153417	.	+	.	transcript_id "MSTRG.2633.2"; gene_id "MSTRG.2633"; exon_number "2";	1	ensembl	CDS	180097790	180097862	.	-	1	gene_id "ENSSSCG00000034516"; gene_version "3"; transcript_id "ENSSSCT00000061065"; transcript_version "2"; exon_number "4"; gene_name "CDKL1"; gene_source "ensembl"; gene_biotype "protein_coding"; transcript_name "CDKL1-203"; transcript_source "ensembl"; transcript_biotype "protein_coding"; protein_id "ENSSSCP00000036467"; protein_version "1";
1	StringTie	exon	180153304	180153417	.	+	.	transcript_id "MSTRG.2633.2"; gene_id "MSTRG.2633"; exon_number "2";	1	ensembl	exon	180095396	180095486	.	-	.	gene_id "ENSSSCG00000034516"; gene_version "3"; transcript_id "ENSSSCT00000061065"; transcript_version "2"; exon_number "5"; gene_name "CDKL1"; gene_source "ensembl"; gene_biotype "protein_coding"; transcript_name "CDKL1-203"; transcript_source "ensembl"; transcript_biotype "protein_coding"; exon_id "ENSSSCE00000043027"; exon_version "1";
1	StringTie	exon	180153304	180153417	.	+	.	transcript_id "MSTRG.2633.2"; gene_id "MSTRG.2633"; exon_number "2";	1	ensembl	CDS	180095396	180095486	.	-	0	gene_id "ENSSSCG00000034516"; gene_version "3"; transcript_id "ENSSSCT00000061065"; transcript_version "2"; exon_number "5"; gene_name "CDKL1"; gene_source "ensembl"; gene_biotype "protein_coding"; transcript_name "CDKL1-203"; transcript_source "ensembl"; transcript_biotype "protein_coding"; protein_id "ENSSSCP00000036467"; protein_version "1";
1	StringTie	exon	180153304	180153417	.	+	.	transcript_id "MSTRG.2633.2"; gene_id "MSTRG.2633"; exon_number "2";	1	ensembl	exon	180109574	180109695	.	-	.	gene_id "ENSSSCG00000034516"; gene_version "3"; transcript_id "ENSSSCT00000078310"; transcript_version "2"; exon_number "3"; gene_name "CDKL1"; gene_source "ensembl"; gene_biotype "protein_coding"; transcript_name "CDKL1-201"; transcript_source "ensembl"; transcript_biotype "protein_coding"; exon_id "ENSSSCE00000299988"; exon_version "1";
1	StringTie	exon	180153304	180153417	.	+	.	transcript_id "MSTRG.2633.2"; gene_id "MSTRG.2633"; exon_number "2";	1	ensembl	CDS	180109574	180109695	.	-	0	gene_id "ENSSSCG00000034516"; gene_version "3"; transcript_id "ENSSSCT00000078310"; transcript_version "2"; exon_number "3"; gene_name "CDKL1"; gene_source "ensembl"; gene_biotype "protein_coding"; transcript_name "CDKL1-201"; transcript_source "ensembl"; transcript_biotype "protein_coding"; protein_id "ENSSSCP00000069969"; protein_version "1";
1	StringTie	exon	180153304	180153417	.	+	.	transcript_id "MSTRG.2633.2"; gene_id "MSTRG.2633"; exon_number "2";	1	ensembl	exon	180109574	180109695	.	-	.	gene_id "ENSSSCG00000034516"; gene_version "3"; transcript_id "ENSSSCT00000075014"; transcript_version "2"; exon_number "3"; gene_name "CDKL1"; gene_source "ensembl"; gene_biotype "protein_coding"; transcript_name "CDKL1-202"; transcript_source "ensembl"; transcript_biotype "protein_coding"; exon_id "ENSSSCE00000299988"; exon_version "1";
1	StringTie	exon	180153304	180153417	.	+	.	transcript_id "MSTRG.2633.2"; gene_id "MSTRG.2633"; exon_number "2";	1	ensembl	CDS	180109574	180109695	.	-	0	gene_id "ENSSSCG00000034516"; gene_version "3"; transcript_id "ENSSSCT00000075014"; transcript_version "2"; exon_number "3"; gene_name "CDKL1"; gene_source "ensembl"; gene_biotype "protein_coding"; transcript_name "CDKL1-202"; transcript_source "ensembl"; transcript_biotype "protein_coding"; protein_id "ENSSSCP00000071907"; protein_version "2";
1	StringTie	exon	180153304	180153417	.	+	.	transcript_id "MSTRG.2633.2"; gene_id "MSTRG.2633"; exon_number "2";	1	ensembl	exon	180109574	180109695	.	-	.	gene_id "ENSSSCG00000034516"; gene_version "3"; transcript_id "ENSSSCT00000061065"; transcript_version "2"; exon_number "3"; gene_name "CDKL1"; gene_source "ensembl"; gene_biotype "protein_coding"; transcript_name "CDKL1-203"; transcript_source "ensembl"; transcript_biotype "protein_coding"; exon_id "ENSSSCE00000299988"; exon_version "1";
1	StringTie	exon	180153304	180153417	.	+	.	transcript_id "MSTRG.2633.2"; gene_id "MSTRG.2633"; exon_number "2";	1	ensembl	CDS	180109574	180109695	.	-	0	gene_id "ENSSSCG00000034516"; gene_version "3"; transcript_id "ENSSSCT00000061065"; transcript_version "2"; exon_number "3"; gene_name "CDKL1"; gene_source "ensembl"; gene_biotype "protein_coding"; transcript_name "CDKL1-203"; transcript_source "ensembl"; transcript_biotype "protein_coding"; protein_id "ENSSSCP00000036467"; protein_version "1";
1	StringTie	exon	180153304	180153417	.	+	.	transcript_id "MSTRG.2633.2"; gene_id "MSTRG.2633"; exon_number "2";	1	ensembl	exon	180144993	180145054	.	-	.	gene_id "ENSSSCG00000034516"; gene_version "3"; transcript_id "ENSSSCT00000078310"; transcript_version "2"; exon_number "1"; gene_name "CDKL1"; gene_source "ensembl"; gene_biotype "protein_coding"; transcript_name "CDKL1-201"; transcript_source "ensembl"; transcript_biotype "protein_coding"; exon_id "ENSSSCE00000333614"; exon_version "3";
1	StringTie	exon	180153304	180153417	.	+	.	transcript_id "MSTRG.2633.2"; gene_id "MSTRG.2633"; exon_number "2";	1	ensembl	exon	180144472	180144757	.	-	.	gene_id "ENSSSCG00000034516"; gene_version "3"; transcript_id "ENSSSCT00000078310"; transcript_version "2"; exon_number "2"; gene_name "CDKL1"; gene_source "ensembl"; gene_biotype "protein_coding"; transcript_name "CDKL1-201"; transcript_source "ensembl"; transcript_biotype "protein_coding"; exon_id "ENSSSCE00000308455"; exon_version "1";
1	StringTie	exon	180153304	180153417	.	+	.	transcript_id "MSTRG.2633.2"; gene_id "MSTRG.2633"; exon_number "2";	1	ensembl	CDS	180144472	180144642	.	-	0	gene_id "ENSSSCG00000034516"; gene_version "3"; transcript_id "ENSSSCT00000078310"; transcript_version "2"; exon_number "2"; gene_name "CDKL1"; gene_source "ensembl"; gene_biotype "protein_coding"; transcript_name "CDKL1-201"; transcript_source "ensembl"; transcript_biotype "protein_coding"; protein_id "ENSSSCP00000069969"; protein_version "1";
1	StringTie	exon	180153304	180153417	.	+	.	transcript_id "MSTRG.2633.2"; gene_id "MSTRG.2633"; exon_number "2";	1	ensembl	five_prime_utr	180144993	180145054	.	-	.	gene_id "ENSSSCG00000034516"; gene_version "3"; transcript_id "ENSSSCT00000078310"; transcript_version "2"; gene_name "CDKL1"; gene_source "ensembl"; gene_biotype "protein_coding"; transcript_name "CDKL1-201"; transcript_source "ensembl"; transcript_biotype "protein_coding";
1	StringTie	exon	180153304	180153417	.	+	.	transcript_id "MSTRG.2633.2"; gene_id "MSTRG.2633"; exon_number "2";	1	ensembl	five_prime_utr	180144643	180144757	.	-	.	gene_id "ENSSSCG00000034516"; gene_version "3"; transcript_id "ENSSSCT00000078310"; transcript_version "2"; gene_name "CDKL1"; gene_source "ensembl"; gene_biotype "protein_coding"; transcript_name "CDKL1-201"; transcript_source "ensembl"; transcript_biotype "protein_coding";
1	StringTie	exon	180153304	180153417	.	+	.	transcript_id "MSTRG.2633.2"; gene_id "MSTRG.2633"; exon_number "2";	1	ensembl	exon	180144993	180145054	.	-	.	gene_id "ENSSSCG00000034516"; gene_version "3"; transcript_id "ENSSSCT00000075014"; transcript_version "2"; exon_number "1"; gene_name "CDKL1"; gene_source "ensembl"; gene_biotype "protein_coding"; transcript_name "CDKL1-202"; transcript_source "ensembl"; transcript_biotype "protein_coding"; exon_id "ENSSSCE00000333614"; exon_version "3";
1	StringTie	exon	180153304	180153417	.	+	.	transcript_id "MSTRG.2633.2"; gene_id "MSTRG.2633"; exon_number "2";	1	ensembl	exon	180144472	180144757	.	-	.	gene_id "ENSSSCG00000034516"; gene_version "3"; transcript_id "ENSSSCT00000075014"; transcript_version "2"; exon_number "2"; gene_name "CDKL1"; gene_source "ensembl"; gene_biotype "protein_coding"; transcript_name "CDKL1-202"; transcript_source "ensembl"; transcript_biotype "protein_coding"; exon_id "ENSSSCE00000308455"; exon_version "1";
1	StringTie	exon	180153304	180153417	.	+	.	transcript_id "MSTRG.2633.2"; gene_id "MSTRG.2633"; exon_number "2";	1	ensembl	CDS	180144472	180144639	.	-	0	gene_id "ENSSSCG00000034516"; gene_version "3"; transcript_id "ENSSSCT00000075014"; transcript_version "2"; exon_number "2"; gene_name "CDKL1"; gene_source "ensembl"; gene_biotype "protein_coding"; transcript_name "CDKL1-202"; transcript_source "ensembl"; transcript_biotype "protein_coding"; protein_id "ENSSSCP00000071907"; protein_version "2";
1	StringTie	exon	180153304	180153417	.	+	.	transcript_id "MSTRG.2633.2"; gene_id "MSTRG.2633"; exon_number "2";	1	ensembl	start_codon	180144637	180144639	.	-	0	gene_id "ENSSSCG00000034516"; gene_version "3"; transcript_id "ENSSSCT00000075014"; transcript_version "2"; exon_number "2"; gene_name "CDKL1"; gene_source "ensembl"; gene_biotype "protein_coding"; transcript_name "CDKL1-202"; transcript_source "ensembl"; transcript_biotype "protein_coding";
1	StringTie	exon	180153304	180153417	.	+	.	transcript_id "MSTRG.2633.2"; gene_id "MSTRG.2633"; exon_number "2";	1	ensembl	five_prime_utr	180144993	180145054	.	-	.	gene_id "ENSSSCG00000034516"; gene_version "3"; transcript_id "ENSSSCT00000075014"; transcript_version "2"; gene_name "CDKL1"; gene_source "ensembl"; gene_biotype "protein_coding"; transcript_name "CDKL1-202"; transcript_source "ensembl"; transcript_biotype "protein_coding";
1	StringTie	exon	180153304	180153417	.	+	.	transcript_id "MSTRG.2633.2"; gene_id "MSTRG.2633"; exon_number "2";	1	ensembl	five_prime_utr	180144640	180144757	.	-	.	gene_id "ENSSSCG00000034516"; gene_version "3"; transcript_id "ENSSSCT00000075014"; transcript_version "2"; gene_name "CDKL1"; gene_source "ensembl"; gene_biotype "protein_coding"; transcript_name "CDKL1-202"; transcript_source "ensembl"; transcript_biotype "protein_coding";
1	StringTie	exon	180153304	180153417	.	+	.	transcript_id "MSTRG.2633.2"; gene_id "MSTRG.2633"; exon_number "2";	1	ensembl	exon	180144993	180145032	.	-	.	gene_id "ENSSSCG00000034516"; gene_version "3"; transcript_id "ENSSSCT00000061065"; transcript_version "2"; exon_number "1"; gene_name "CDKL1"; gene_source "ensembl"; gene_biotype "protein_coding"; transcript_name "CDKL1-203"; transcript_source "ensembl"; transcript_biotype "protein_coding"; exon_id "ENSSSCE00000433102"; exon_version "1";
1	StringTie	exon	180153304	180153417	.	+	.	transcript_id "MSTRG.2633.2"; gene_id "MSTRG.2633"; exon_number "2";	1	ensembl	exon	180144472	180144757	.	-	.	gene_id "ENSSSCG00000034516"; gene_version "3"; transcript_id "ENSSSCT00000061065"; transcript_version "2"; exon_number "2"; gene_name "CDKL1"; gene_source "ensembl"; gene_biotype "protein_coding"; transcript_name "CDKL1-203"; transcript_source "ensembl"; transcript_biotype "protein_coding"; exon_id "ENSSSCE00000308455"; exon_version "1";
1	StringTie	exon	180153304	180153417	.	+	.	transcript_id "MSTRG.2633.2"; gene_id "MSTRG.2633"; exon_number "2";	1	ensembl	CDS	180144472	180144639	.	-	0	gene_id "ENSSSCG00000034516"; gene_version "3"; transcript_id "ENSSSCT00000061065"; transcript_version "2"; exon_number "2"; gene_name "CDKL1"; gene_source "ensembl"; gene_biotype "protein_coding"; transcript_name "CDKL1-203"; transcript_source "ensembl"; transcript_biotype "protein_coding"; protein_id "ENSSSCP00000036467"; protein_version "1";
1	StringTie	exon	180153304	180153417	.	+	.	transcript_id "MSTRG.2633.2"; gene_id "MSTRG.2633"; exon_number "2";	1	ensembl	start_codon	180144637	180144639	.	-	0	gene_id "ENSSSCG00000034516"; gene_version "3"; transcript_id "ENSSSCT00000061065"; transcript_version "2"; exon_number "2"; gene_name "CDKL1"; gene_source "ensembl"; gene_biotype "protein_coding"; transcript_name "CDKL1-203"; transcript_source "ensembl"; transcript_biotype "protein_coding";
1	StringTie	exon	180153304	180153417	.	+	.	transcript_id "MSTRG.2633.2"; gene_id "MSTRG.2633"; exon_number "2";	1	ensembl	five_prime_utr	180144993	180145032	.	-	.	gene_id "ENSSSCG00000034516"; gene_version "3"; transcript_id "ENSSSCT00000061065"; transcript_version "2"; gene_name "CDKL1"; gene_source "ensembl"; gene_biotype "protein_coding"; transcript_name "CDKL1-203"; transcript_source "ensembl"; transcript_biotype "protein_coding";
1	StringTie	exon	180153304	180153417	.	+	.	transcript_id "MSTRG.2633.2"; gene_id "MSTRG.2633"; exon_number "2";	1	ensembl	five_prime_utr	180144640	180144757	.	-	.	gene_id "ENSSSCG00000034516"; gene_version "3"; transcript_id "ENSSSCT00000061065"; transcript_version "2"; gene_name "CDKL1"; gene_source "ensembl"; gene_biotype "protein_coding"; transcript_name "CDKL1-203"; transcript_source "ensembl"; transcript_biotype "protein_coding";
1	StringTie	exon	180153304	180153417	.	+	.	transcript_id "MSTRG.2633.2"; gene_id "MSTRG.2633"; exon_number "2";	1	ensembl	exon	180173520	180173612	.	-	.	gene_id "ENSSSCG00000036634"; gene_version "3"; transcript_id "ENSSSCT00000087108"; transcript_version "2"; exon_number "30"; gene_name "MAP4K5"; gene_source "ensembl"; gene_biotype "protein_coding"; transcript_name "MAP4K5-201"; transcript_source "ensembl"; transcript_biotype "protein_coding"; exon_id "ENSSSCE00000367886"; exon_version "1";
1	StringTie	exon	180153304	180153417	.	+	.	transcript_id "MSTRG.2633.2"; gene_id "MSTRG.2633"; exon_number "2";	1	ensembl	CDS	180173520	180173612	.	-	2	gene_id "ENSSSCG00000036634"; gene_version "3"; transcript_id "ENSSSCT00000087108"; transcript_version "2"; exon_number "30"; gene_name "MAP4K5"; gene_source "ensembl"; gene_biotype "protein_coding"; transcript_name "MAP4K5-201"; transcript_source "ensembl"; transcript_biotype "protein_coding"; protein_id "ENSSSCP00000060345"; protein_version "2";
1	StringTie	exon	180153304	180153417	.	+	.	transcript_id "MSTRG.2633.2"; gene_id "MSTRG.2633"; exon_number "2";	1	ensembl	exon	180170189	180170259	.	-	.	gene_id "ENSSSCG00000036634"; gene_version "3"; transcript_id "ENSSSCT00000087108"; transcript_version "2"; exon_number "31"; gene_name "MAP4K5"; gene_source "ensembl"; gene_biotype "protein_coding"; transcript_name "MAP4K5-201"; transcript_source "ensembl"; transcript_biotype "protein_coding"; exon_id "ENSSSCE00000208369"; exon_version "2";
1	StringTie	exon	180153304	180153417	.	+	.	transcript_id "MSTRG.2633.2"; gene_id "MSTRG.2633"; exon_number "2";	1	ensembl	CDS	180170189	180170259	.	-	2	gene_id "ENSSSCG00000036634"; gene_version "3"; transcript_id "ENSSSCT00000087108"; transcript_version "2"; exon_number "31"; gene_name "MAP4K5"; gene_source "ensembl"; gene_biotype "protein_coding"; transcript_name "MAP4K5-201"; transcript_source "ensembl"; transcript_biotype "protein_coding"; protein_id "ENSSSCP00000060345"; protein_version "2";
[truncated: 13,382 more rows]

## Sheet: vagina
Table S3. Cis-acting target genes of differentially expressed lincRNAs.
[truncated: 7,517 more rows]
