# Supplementary material for: Deciphering Estrus Expression in Gilts: The Role of Alternative Polyadenylation and LincRNAs in Reproductive Transcriptomics
Source: Animals (Basel). 2024 Mar 4;14(5):791. doi: 10.3390/ani14050791 (PMC10931002; doi:10.3390/ani14050791)
Supplement: Supplementary file 1 [file animals-14-00791-s001.zip › table S6.xlsx]

## Sheet: tableS2-V_kegg
Table S6. Functional enrichment analysis of genes undergoing APA in the vulva
Group	Term	Category	Count	Pvalue(adj)
LDV vs. LEV	Neurotrophin signaling pathway	Lengthened	4	5.56e-05
	Fluid shear stress and atherosclerosis	Lengthened	4	9.27e-05
	Cellular senescence	Lengthened	4	0.000156309
	Protein digestion and absorption	Lengthened	3	0.000484233
	Terpenoid backbone biosynthesis	Lengthened	2	0.000712203
	AGE-RAGE signaling pathway in diabetic complications	Lengthened	3	0.000741543
	TNF signaling pathway	Lengthened	3	0.000897388
	Sphingolipid signaling pathway	Lengthened	3	0.00115385
	Relaxin signaling pathway	Lengthened	3	0.00151738
	Antifolate resistance	Lengthened	2	0.00156038
	Apoptosis	Lengthened	3	0.00168773
	Phagosome	Shortened	16	9.5e-09
	Protein processing in endoplasmic reticulum	Shortened	16	4.38e-08
	Tight junction	Shortened	16	6.47e-08
	Mitophagy - animal	Shortened	10	3.72e-07
	Focal adhesion	Shortened	16	4.6e-07
	Endocytosis	Shortened	15	2.21e-05
	Leukocyte transendothelial migration	Shortened	10	3.06e-05
	Apoptosis	Shortened	10	0.000142908
	Lysosome	Shortened	9	0.000262326
	Regulation of actin cytoskeleton	Shortened	12	0.000299417
	Hippo signaling pathway	Shortened	10	0.000335707
	Spliceosome	Shortened	9	0.000349472
	Pertussis	Shortened	7	0.000353369
	Starch and sucrose metabolism	Shortened	5	0.000379492
	Chagas disease (American trypanosomiasis)	Shortened	8	0.000646365
	PI3K-Akt signaling pathway	Shortened	15	0.000768421
	Antigen processing and presentation	Shortened	6	0.000890793
	Necroptosis	Shortened	9	0.00116351
	Small cell lung cancer	Shortened	7	0.00119553
	RNA transport	Shortened	9	0.00127187
	Human papillomavirus infection	Shortened	14	0.0013259
	AMPK signaling pathway	Shortened	8	0.00136558
	Collecting duct acid secretion	Shortened	4	0.00141545
	Adherens junction	Shortened	6	0.00148831
MDV vs. MEV	Phagosome	Lengthened	12	0.00200097
	Cellular senescence	Lengthened	12	0.00277825
	Protein processing in endoplasmic reticulum	Lengthened	12	0.00277825
	Metabolic pathways	Lengthened	43	0.00346063
	Human T-cell leukemia virus 1 infection	Lengthened	12	0.0317649
	FoxO signaling pathway	Lengthened	9	0.0339417
	Steroid biosynthesis	Lengthened	4	0.0348971
	Terpenoid backbone biosynthesis	Lengthened	4	0.0382496
	Endocytosis	Lengthened	12	0.0382496
	Focal adhesion	Shortened	7	0.0158943
	ECM-receptor interaction	Shortened	5	0.0158943
	Phagosome	Shortened	6	0.0158943
	Human papillomavirus infection	Shortened	8	0.0240967
	Arrhythmogenic right ventricular cardiomyopathy (ARVC)	Shortened	4	0.0361598
	Cell adhesion molecules (CAMs)	Shortened	5	0.0442072
	Protein digestion and absorption	Shortened	4	0.0444617
	Hypertrophic cardiomyopathy (HCM)	Shortened	4	0.0444617
	Dilated cardiomyopathy (DCM)	Shortened	4	0.0459293
