# Supplementary material for: Deciphering Estrus Expression in Gilts: The Role of Alternative Polyadenylation and LincRNAs in Reproductive Transcriptomics
Source: Animals (Basel). 2024 Mar 4;14(5):791. doi: 10.3390/ani14050791 (PMC10931002; doi:10.3390/ani14050791)
Supplement: Supplementary file 1 [file animals-14-00791-s001.zip › table S7.xlsx]

## Sheet: tableS3-Y_KEGG
Table S7. Functional enrichment analysis of genes undergoing APA in the vagina
Group	Term	Category	Count	Pvalue(adj)
LDY vs. LEY	Lysosome	Lengthened	11	0.00410585
	Focal adhesion	Lengthened	13	0.0134728
	Sphingolipid metabolism	Lengthened	6	0.029317
	Proteoglycans in cancer	Lengthened	12	0.0314607
	Prion diseases	Lengthened	5	0.0374727
	Human cytomegalovirus infection	Lengthened	12	0.0442495
	Metabolic pathways	Lengthened	42	0.0442495
	Autophagy - animal	Lengthened	9	0.0442495
	FoxO signaling pathway	Lengthened	9	0.0463493
	Human papillomavirus infection	Lengthened	15	0.0463493
	Complement and coagulation cascades	Lengthened	7	0.0463493
	Lysine degradation	Lengthened	6	0.0463994
	Protein processing in endoplasmic reticulum	Lengthened	10	0.0463994
	Endocytosis	Shortened	7	0.0241829
MDY vs. MEY	Apoptosis(KEGG)	Lengthened	6	0.017547
	HIF-1 signaling pathway(KEGG)	Lengthened	5	0.0401535
	nucleus(GO)	Lengthened	36	0.000522859
	endoplasmic reticulum(GO)	Lengthened	13	0.0027494
	integrin binding(GO)	Lengthened	6	0.0027494
	protein phosphatase regulator activity(GO)	Lengthened	4	0.0027494
	regulation of phosphoprotein phosphatase activity(GO)	Lengthened	4	0.00400569
	cytosol(GO)	Lengthened	27	0.00400569
	nucleoplasm(GO)	Lengthened	21	0.017547
	heparin binding(GO)	Lengthened	5	0.0319723
	protein stabilization(GO)	Lengthened	5	0.0401535
	angiogenesis(GO)	Lengthened	5	0.04249
	extracellular matrix organization(GO)	Lengthened	5	0.04249
	cellular response to glucocorticoid stimulus(GO)	Lengthened	2	0.04249
	CRD-mediated mRNA stability complex(GO)	Lengthened	2	0.04249
	neutrophil clearance(GO)	Lengthened	2	0.04249
	positive regulation of cell migration(GO)	Lengthened	5	0.0475165
	E-box binding(GO)	Shortened	4	0.0248368
