# Supplementary material for: Deciphering Estrus Expression in Gilts: The Role of Alternative Polyadenylation and LincRNAs in Reproductive Transcriptomics
Source: Animals (Basel). 2024 Mar 4;14(5):791. doi: 10.3390/ani14050791 (PMC10931002; doi:10.3390/ani14050791)
Supplement: Supplementary file 1 [file animals-14-00791-s001.zip › table S8.xlsx]

## Sheet: tableS4-Y_V_KEGG
Table S8. Functional enrichment analysis of genes undergoing APA in the vulva and vagina
Group	Term	Category	Count	Pvalue(adj)
LY vs. LV	Focal adhesion	Lengthened	48	3.78e-09
	Endocytosis	Lengthened	53	8.81e-09
	Protein processing in endoplasmic reticulum	Lengthened	41	4.34e-08
	Lysosome	Lengthened	34	9.7e-08
	Phagosome	Lengthened	35	1.51e-06
	Hepatitis C	Lengthened	35	2.24e-06
	Human papillomavirus infection	Lengthened	56	2.36e-06
	Pathways in cancer	Lengthened	76	3.11e-06
	Metabolic pathways	Lengthened	158	8.68e-06
	Tight junction	Lengthened	36	1.04e-05
	Regulation of actin cytoskeleton	Lengthened	40	2.11e-05
	Renal cell carcinoma	Lengthened	21	3e-05
	Adherens junction	Lengthened	21	3.58e-05
	PI3K-Akt signaling pathway	Lengthened	53	5.11e-05
	FoxO signaling pathway	Lengthened	29	5.72e-05
	Human immunodeficiency virus 1 infection	Lengthened	38	6.26e-05
	Viral carcinogenesis	Lengthened	35	9.53e-05
	Kaposi sarcoma-associated herpesvirus infection	Lengthened	34	0.000116503
	Cell cycle	Lengthened	27	0.000118237
	Spliceosome	Lengthened	27	0.000146488
	Glycerophospholipid metabolism	Shortened	4	0.0160541
	Ether lipid metabolism	Shortened	3	0.0160541
MY vs. MV	PI3K-Akt signaling pathway	Lengthened	54	1.01e-09
	Focal adhesion	Lengthened	39	2.7e-09
	Protein processing in endoplasmic reticulum	Lengthened	34	1.69e-08
	Endocytosis	Lengthened	41	4.02e-08
	Hepatitis C	Lengthened	31	8.16e-08
	Lysosome	Lengthened	27	2.24e-07
	Human papillomavirus infection	Lengthened	46	3.54e-07
	Pathways in cancer	Lengthened	60	1.17e-06
	Chagas disease (American trypanosomiasis)	Lengthened	24	2.08e-06
	Tight junction	Lengthened	30	2.55e-06
	Phagosome	Lengthened	27	5.01e-06
	Hepatitis B	Lengthened	28	6.97e-06
	Amoebiasis	Lengthened	21	8.11e-06
	Proteoglycans in cancer	Lengthened	32	8.11e-06
	Human cytomegalovirus infection	Lengthened	33	1.13e-05
	Viral carcinogenesis	Lengthened	30	1.13e-05
	Adherens junction	Lengthened	18	1.21e-05
	Apoptosis	Lengthened	25	1.38e-05
	Oocyte meiosis	Lengthened	23	1.42e-05
	Human T-cell leukemia virus 1 infection	Lengthened	33	1.48e-05
	nucleus(GO)	Shortened	27	0.000812464
	mRNA binding(GO)	Shortened	6	0.00788715
	extracellular exosome(GO)	Shortened	4	0.00788715
	autophagy(GO)	Shortened	3	0.0423646
	DNA replication(GO)	Shortened	3	0.0423646
	beta-catenin destruction complex(GO)	Shortened	2	0.0423646
