# Supplementary material for: Deciphering Estrus Expression in Gilts: The Role of Alternative Polyadenylation and LincRNAs in Reproductive Transcriptomics
Source: Animals (Basel). 2024 Mar 4;14(5):791. doi: 10.3390/ani14050791 (PMC10931002; doi:10.3390/ani14050791)
Supplement: Supplementary file 1 [file animals-14-00791-s001.zip › table S9.xlsx]

## Sheet: Sheet1
Table S9. The transcripts with |ΔPDUI| ≥ 0.35.
Group	Transcript	Gene	Chr	fit_value	Predicted_Proximal_APA	Loci	Group_A_Mean_PDUI	Group_B_Mean_PDUI	ΔPDUI	P_val	adjusted.P_val
LDV vs. LEV	XM_001925989.7	ABHD2	chr7	1151.4	54770064	chr7:54769766-54776140	0.94	0.376667	0.56	5.7e-20	1.4e-17
	XM_005669466.3	CCDC12	chr13	596.6	29788077	chr13:29785581-29791320	0.746667	0.263333	0.48	5.74e-09	4.73e-07
	XM_021064040.1	PTER	chr10	54.7	45369577	chr10:45368901-45369778	1	0.63	0.37	4.28e-06	0.000178832
	XR_002336746.1	TPP2	chr11	393.4	71008591	chr11:71008390-71008854	0.84	0.493333	0.35	1.81e-07	1.05e-05
	XM_013987242.2	RCE1	chr2	518.8	5588859	chr2:5587853-5589278	0.35	0.82	-0.47	5.56e-07	2.99e-05
	XM_013996826.2	TOMM40L	chr4	33.4	89232237	chr4:89231781-89232515	0.546667	0.916667	-0.37	8.12e-05	0.00229785
	XM_021067495.1	DHRS13	chr12	110	45121383	chr12:45121146-45121795	0.523333	0.883333	-0.36	0.000771012	0.0146569
LDY vs. LEY	XM_013994109.2	POLA2	chr2	33.9	6922619	chr2:6922384-6922820	0.9	0.515	0.39	0.000463026	0.00941581
	XM_021094621.1	FKRP	chr6	17.6	52637208	chr6:52637007-52637451	0.8	0.42	0.38	0.00130822	0.0212135
	XM_021084358.1	PHYKPL	chr2	110.3	80186428	chr2:80186227-80186998	1	0.65	0.35	0.000347029	0.00743473
	XM_003126079.5	CRY1	chr5	27.3	13364160	chr5:13363959-13364597	0.44	1	-0.56	4.03599e-10	4.58865e-08
	XM_013992659.2	CEP162	chr1	45.5	53333231	chr1:53332428-53333966	0.47	0.95	-0.48	8.29769e-07	5.09315e-05
	XM_021080783.1	CXHXorf23	chrX	74.8	16253269	chrX:16253083-16253470	0.48	0.96	-0.48	7.055e-06	0.000315113
	XM_013985901.2	MOSPD2	chrX	139.2	11473307	chrX:11473041-11473969	0.496667	0.9	-0.4	1.7951e-05	0.000657876
	XM_021067994.1	MIEF2	chr12	38	60472274	chr12:60470645-60472475	0.6	1	-0.4	2.86663e-05	0.000952844
	XR_002344076.1	CASC1	chr5	31.2	48648830	chr5:48648589-48649067	0.5	0.88	-0.38	9.42752e-05	0.00261281
	XM_021073482.1	PDCD11	chr14	124.7	114378950	chr14:114378749-114380467	0.33	0.685	-0.36	0.00248114	0.0342946
LY vs. LV	XM_021063648.1	NFIB	chr1	3062.2	208422315	chr1:208420875-208427504	0.906667	0.338333	0.57	4.00666e-18	1.57302e-16
	XM_005667533.3	NUCKS1	chr9	9861.8	66403586	chr9:66398845-66403787	0.806667	0.393333	0.41	1.21276e-34	1.39706e-32
	XR_115698.4	PCNX4	chr1	928.9	189150257	chr1:189149835-189151871	0.46	0.993333	-0.53	3.17788e-12	6.41068e-11
	XR_115757.6	LOC100513397	chr2	2153.5	68657142	chr2:68655873-68657910	0.386667	0.843333	-0.46	3.33911e-18	1.32882e-16
	XM_021070141.1	SNAP23	chr1	854.8	128849975	chr1:128849465-128850980	0.535	0.936667	-0.4	5.50016e-18	2.08458e-16
	XM_021095972.1	C6H1orf109	chr6	1254.9	93743358	chr6:93741085-93744292	0.55	0.948333	-0.4	4.51885e-09	5.86982e-08
	XM_021065988.1	FECH	chr1	529.4	106861988	chr1:106861628-106862912	0.448333	0.84	-0.39	2.23997e-10	3.70018e-09
	XM_013978128.2	ARHGAP5	chr7	1874.7	67497451	chr7:67494237-67497883	0.566667	0.96	-0.39	1.43547e-15	4.18918e-14
	XM_021065812.1	MBNL2	chr11	3780.7	66639869	chr11:66638894-66641644	0.606667	0.991667	-0.39	6.80592e-17	2.32757e-15
	XM_013985467.2	ADNP	chr17	4158.1	52317970	chr17:52316388-52321851	0.323333	0.715	-0.39	8.12343e-14	1.96466e-12
	XM_021097468.1	NDUFAF1	chr1	377.7	129991722	chr1:129990345-129992797	0.443333	0.81	-0.37	2.59778e-05	0.00017062
	XM_001924618.6	TRAM1	chr4	6151.1	64799420	chr4:64798940-64800513	0.53	0.901667	-0.37	1.34043e-35	1.62992e-33
	XM_003135124.6	SMC1A	chrX	670.7	46163310	chrX:46158729-46164807	0.55	0.908333	-0.36	2.50208e-08	2.92467e-07
	XM_021065554.1	B3GLCT	chr11	653.1	7906213	chr11:7905116-7907052	0.426667	0.786667	-0.36	1.15715e-07	1.19187e-06
	XM_021069885.1	DCUN1D1	chr13	929.4	120914989	chr13:120914001-120916810	0.583333	0.943333	-0.36	2.01612e-09	2.74512e-08
	XM_013997353.2	STAM2	chr15	287.5	167049	chr15:165257-168659	0.366667	0.726667	-0.36	2.95474e-05	0.000192333
	XM_021076996.1	NNT	chr16	428.6	28248408	chr16:28247758-28248719	0.535	0.895	-0.36	2.06877e-09	2.79939e-08
	XM_021079153.1	CANX	chr2	27520.3	78881204	chr2:78879031-78881405	0.606667	0.956667	-0.35	1.16046e-77	5.64435e-75
	XM_021070783.1	GBE1	chr13	1053	173909112	chr13:173908877-173909646	0.578333	0.928333	-0.35	9.33111e-15	2.46066e-13
	XM_021068460.1	PLSCR1	chr13	2175.7	86837070	chr13:86836288-86837271	0.4	0.748333	-0.35	5.54482e-09	7.11803e-08
