# Supplementary material for: Deciphering Estrus Expression in Gilts: The Role of Alternative Polyadenylation and LincRNAs in Reproductive Transcriptomics
Source: Animals (Basel). 2024 Mar 4;14(5):791. doi: 10.3390/ani14050791 (PMC10931002; doi:10.3390/ani14050791)
Supplement: Supplementary file 1 [file animals-14-00791-s001.zip › table S10.xlsx]

## Sheet: Sheet1
Table S10. Overview of the CPEs present in the lengthened 3'UTRs of these genes with |ΔPDUI| ≥ 0.35.
Gene	CPE type	number	CPE type	number	CPE type	number	CPE type	number
ABHD2	CPENC	1	CPEC	7	HEXA	2	PBE	1
CCDC12	CPENC	4	CPEC	3	HEXA	1	PBE	0
PTER	CPENC	0	CPEC	0	HEXA	1	PBE	0
TPP2	CPENC	0	CPEC	2	HEXA	1	PBE	0
RCE1	CPENC	0	CPEC	0	HEXA	2	PBE	0
TOMM40L	CPENC	0	CPEC	0	HEXA	0	PBE	0
DHRS13	CPENC	0	CPEC	0	HEXA	0	PBE	0
POLA2	CPENC	0	CPEC	1	HEXA	0	PBE	0
FKRP	CPENC	0	CPEC	0	HEXA	2	PBE	0
PHYKPL	CPENC	0	CPEC	0	HEXA	1	PBE	0
CRY1	CPENC	1	CPEC	0	HEXA	0	PBE	1
CEP162	CPENC	0	CPEC	8	HEXA	4	PBE	0
CXHXorf23	CPENC	0	CPEC	1	HEXA	0	PBE	0
MOSPD2	CPENC	1	CPEC	4	HEXA	1	PBE	0
MIEF2	CPENC	0	CPEC	0	HEXA	0	PBE	0
CASC1	CPENC	0	CPEC	1	HEXA	0	PBE	0
PDCD11	CPENC	0	CPEC	1	HEXA	1	PBE	0
NFIB	CPENC	7	CPEC	9	HEXA	11	PBE	2
NUCKS1	CPENC	1	CPEC	7	HEXA	6	PBE	1
PCNX4	CPENC	5	CPEC	7	HEXA	2	PBE	2
LOC100513397	CPENC	1	CPEC	1	HEXA	1	PBE	0
SNAP23	CPENC	1	CPEC	0	HEXA	3	PBE	0
C6H1orf109	CPENC	1	CPEC	4	HEXA	4	PBE	0
FECH	CPENC	0	CPEC	1	HEXA	2	PBE	0
ARHGAP5	CPENC	3	CPEC	6	HEXA	12	PBE	2
MBNL2	CPENC	4	CPEC	8	HEXA	3	PBE	0
ADNP	CPENC	0	CPEC	1	HEXA	2	PBE	0
NDUFAF1	CPENC	2	CPEC	2	HEXA	1	PBE	1
TRAM1	CPENC	0	CPEC	1	HEXA	1	PBE	0
SMC1A	CPENC	1	CPEC	3	HEXA	3	PBE	2
B3GLCT	CPENC	1	CPEC	2	HEXA	1	PBE	0
DCUN1D1	CPENC	3	CPEC	4	HEXA	3	PBE	1
STAM2	CPENC	3	CPEC	5	HEXA	6	PBE	2
NNT	CPENC	0	CPEC	1	HEXA	2	PBE	0
CANX	CPENC	0	CPEC	3	HEXA	5	PBE	0
GBE1	CPENC	1	CPEC	2	HEXA	2	PBE	0
PLSCR1	CPENC	2	CPEC	1	HEXA	3	PBE	1
